# Supplementary material for: Prediction of drug–target interaction by label propagation with mutual interaction information derived from heterogeneous network
Source: Royal Society of Chemistry journal article supplement (doi:10.1039/c5mb00615e), 2015-12-01
Supplement: c5mb00615e4.xlsx [file c5mb00615e4.xlsx]

## Sheet: DT network
Table S10 Enzymes (Es) dataset drug-target interaction network
	D00002	D00005	D00007	D00014	D00018	D00021	D00027	D00029	D00032	D00035	D00036	D00037	D00038	D00039	D00041	D00043	D00045	D00049	D00050	D00052	D00054	D00055	D00065	D00070	D00086	D00094	D00097	D00103	D00107	D00109	D00118	D00120	D00125	D00126	D00127	D00129	D00130	D00131	D00132	D00136	D00139	D00141	D00142	D00145	D00148	D00151	D00153	D00155	D00158
hsa:10	1	0	0	0	0	0	0	0	0	0	0	0	0	0	0	0	0	0	0	0	0	0	0	0	0	0	0	0	0	0	0	0	0	0	0	0	0	0	0	0	0	0	0	0	0	0	0	0	0
hsa:100	0	0	0	0	0	0	0	0	0	0	0	1	0	0	0	0	0	0	0	0	0	0	0	0	0	0	0	0	0	0	0	0	0	0	0	0	0	0	0	0	0	0	0	0	0	0	0	1	0
hsa:10056	0	0	0	0	0	1	0	0	0	0	0	0	0	0	0	0	0	0	0	0	0	0	0	0	0	0	0	0	0	0	0	0	0	0	0	0	0	0	0	0	0	0	0	0	0	0	0	0	0
hsa:1017	0	0	0	0	0	0	0	0	0	0	0	0	0	0	0	0	0	0	0	0	0	0	0	0	0	0	0	0	0	0	0	0	0	0	0	0	0	0	0	0	0	0	0	0	0	0	0	0	0
hsa:1018	0	0	0	0	0	0	0	0	0	0	0	0	0	0	0	0	0	0	0	0	0	0	0	0	0	0	0	0	0	0	0	0	0	0	0	0	0	0	0	0	0	0	0	0	0	0	0	0	0
hsa:10188	0	0	0	0	0	0	0	0	0	0	0	0	0	0	0	0	0	0	0	0	0	0	0	0	0	0	0	0	0	0	0	0	0	0	0	0	0	0	0	0	0	0	0	0	0	0	0	0	0
hsa:1019	0	0	0	0	0	0	0	0	0	0	0	0	0	0	0	0	0	0	0	0	0	0	0	0	0	0	0	0	0	0	0	0	0	0	0	0	0	0	0	0	0	0	0	0	0	0	0	0	0
hsa:1020	0	0	0	0	0	0	0	0	0	0	0	0	0	0	0	0	0	0	0	0	0	0	0	0	0	0	0	0	0	0	0	0	0	0	0	0	0	0	0	0	0	0	0	0	0	0	0	0	0
hsa:1021	0	0	0	0	0	0	0	0	0	0	0	0	0	0	0	0	0	0	0	0	0	0	0	0	0	0	0	0	0	0	0	0	0	0	0	0	0	0	0	0	0	0	0	0	0	0	0	0	0
hsa:1022	0	0	0	0	0	0	0	0	0	0	0	0	0	0	0	0	0	0	0	0	0	0	0	0	0	0	0	0	0	0	0	0	0	0	0	0	0	0	0	0	0	0	0	0	0	0	0	0	0
hsa:1024	0	0	0	0	0	0	0	0	0	0	0	0	0	0	0	0	0	0	0	0	0	0	0	0	0	0	0	0	0	0	0	0	0	0	0	0	0	0	0	0	0	0	0	0	0	0	0	0	0
hsa:1025	0	0	0	0	0	0	0	0	0	0	0	0	0	0	0	0	0	0	0	0	0	0	0	0	0	0	0	0	0	0	0	0	0	0	0	0	0	0	0	0	0	0	0	0	0	0	0	0	0
hsa:10269	0	0	0	0	0	0	0	0	0	0	0	0	0	0	0	0	0	0	0	0	0	0	0	0	0	0	0	0	0	0	0	0	0	0	0	0	0	0	0	0	0	0	0	0	0	0	0	0	0
hsa:10279	0	0	0	0	0	0	0	0	0	0	0	0	0	0	0	1	0	0	0	0	0	0	0	0	0	0	0	0	0	0	0	0	0	0	0	0	0	0	0	0	0	0	0	0	0	0	0	0	0
hsa:10295	0	0	0	0	0	0	0	0	0	0	0	0	0	1	0	0	0	0	0	0	0	0	1	0	0	0	0	0	0	0	0	0	0	0	0	0	0	0	0	0	0	0	0	0	0	0	0	0	0
hsa:10327	0	0	0	0	0	0	0	0	0	0	0	0	0	0	0	0	0	0	0	0	0	0	0	0	0	0	0	0	0	0	0	0	0	0	0	0	0	0	0	1	0	0	0	0	0	0	0	0	0
hsa:1033	0	0	0	0	0	0	0	0	0	0	0	0	0	0	0	0	0	0	0	0	0	0	0	0	0	0	0	0	1	0	0	0	0	0	0	0	0	0	0	0	0	0	0	0	0	0	0	0	0
hsa:10461	0	0	0	0	0	0	0	0	0	0	0	0	0	0	0	0	0	0	0	0	0	0	0	0	0	0	0	0	0	0	0	0	0	0	0	0	0	0	0	0	0	0	0	0	0	0	0	0	0
hsa:10549	0	0	0	0	0	0	0	0	0	0	0	0	0	0	0	0	0	0	0	0	0	0	0	0	0	0	0	0	0	0	0	0	0	0	0	0	0	0	0	0	0	0	0	0	0	0	0	0	0
hsa:1056	0	0	0	0	0	0	0	0	0	0	0	0	0	0	0	0	0	0	0	0	0	0	0	0	0	0	0	0	0	0	0	0	0	0	0	0	0	0	0	0	0	0	0	0	0	0	0	0	0
hsa:10667	0	0	0	0	0	1	0	0	0	0	0	0	0	0	0	0	0	0	0	0	0	0	0	0	0	0	0	0	0	0	0	0	0	0	0	0	0	0	0	0	0	0	0	0	0	0	0	0	0
hsa:107	1	0	0	0	0	0	0	0	0	0	0	0	0	0	0	0	1	0	0	0	0	0	0	0	0	0	0	0	0	0	0	0	0	0	0	0	0	0	0	0	0	0	0	0	0	0	0	0	0
hsa:10720	0	0	0	0	0	0	0	0	0	0	0	0	0	0	0	0	0	0	0	0	0	0	0	0	0	0	0	0	0	0	0	0	0	0	0	0	0	0	0	0	0	0	0	0	0	0	0	0	0
hsa:10747	0	0	0	0	0	0	0	0	0	0	0	0	0	0	0	1	0	0	0	0	0	0	0	0	0	0	0	0	0	0	0	0	0	0	0	0	0	0	0	0	0	0	0	0	0	0	0	0	0
hsa:108	1	0	0	0	0	0	0	0	0	0	0	0	0	0	0	0	0	0	0	0	0	0	0	0	0	0	0	0	0	0	0	0	0	0	0	0	0	0	0	0	0	0	0	0	0	0	0	0	0
hsa:10825	0	0	0	0	0	0	0	0	0	0	0	0	0	0	0	0	0	0	0	0	0	0	0	0	0	0	0	0	0	0	0	0	0	0	0	0	0	0	0	0	0	0	0	0	0	0	0	0	0
hsa:10846	0	0	0	0	0	0	0	0	0	0	0	0	0	0	0	0	0	0	0	0	0	0	0	0	0	0	0	0	0	0	0	0	0	0	0	0	0	0	0	0	0	0	0	0	0	0	0	0	0
hsa:10858	0	0	0	0	0	0	0	0	0	0	0	0	0	0	0	0	0	0	0	0	0	0	0	0	0	0	0	0	0	0	0	0	0	0	0	0	0	0	0	0	1	0	0	0	0	0	0	0	0
hsa:109	1	0	0	0	0	0	0	0	0	0	0	0	0	0	0	0	0	0	0	0	0	0	0	0	0	0	0	0	0	0	0	0	0	0	0	0	0	0	0	0	0	0	0	0	0	0	0	0	0
hsa:10901	0	0	0	0	0	0	0	0	0	0	0	0	0	0	0	0	0	0	0	0	0	0	0	0	0	0	0	0	0	0	0	0	0	0	0	0	0	0	0	0	0	0	0	0	0	0	0	0	0
hsa:10924	0	0	0	0	0	0	0	0	0	0	0	0	0	0	0	0	0	0	0	0	0	0	0	0	0	0	0	0	0	0	0	0	0	0	0	0	0	0	0	0	0	0	0	0	0	0	0	0	0
hsa:10935	0	0	0	0	0	0	0	0	0	0	0	0	0	0	0	0	0	0	0	0	0	0	0	0	0	0	0	0	0	0	0	0	0	0	0	0	0	0	0	0	0	0	0	0	0	0	0	0	0
hsa:10941	0	0	0	0	0	0	0	0	0	0	0	0	0	0	0	0	0	0	0	0	0	0	0	0	0	0	0	0	0	0	0	0	0	0	0	0	0	0	0	0	0	0	0	0	0	0	0	0	0
hsa:11072	0	0	0	0	0	0	0	0	0	0	0	0	0	0	0	0	0	0	0	0	0	0	0	0	0	0	0	0	1	0	0	0	0	0	0	0	0	0	0	0	0	0	0	0	0	0	0	0	0
hsa:111	1	0	0	0	0	0	0	0	0	0	0	0	0	0	0	0	0	0	0	0	0	0	0	0	0	0	0	0	0	0	0	0	0	0	0	0	0	0	0	0	0	0	0	0	0	0	0	0	0
hsa:112	1	0	0	0	0	0	0	0	0	0	0	0	0	0	0	0	0	0	0	0	0	0	0	0	0	0	0	0	0	0	0	0	0	0	0	0	0	0	0	0	0	0	0	0	0	0	0	0	0
hsa:11202	0	0	0	0	0	0	0	0	0	0	0	0	0	0	0	1	0	0	0	0	0	0	0	0	0	0	0	0	0	0	0	0	0	0	0	0	0	0	0	0	0	0	0	0	0	0	0	0	0
hsa:11221	0	0	0	0	0	0	0	0	0	0	0	0	0	0	0	0	0	0	0	0	0	0	0	0	0	0	0	0	1	0	0	0	0	0	0	0	0	0	0	0	0	0	0	0	0	0	0	0	0
hsa:11238	0	0	0	0	0	0	0	0	0	0	0	0	0	0	0	0	0	0	0	0	0	0	0	0	0	0	0	0	0	0	0	0	0	0	0	0	0	0	0	0	0	0	0	0	0	0	0	0	0
hsa:11266	0	0	0	0	0	0	0	0	0	0	0	0	0	0	0	0	0	0	0	0	0	0	0	0	0	0	0	0	1	0	0	0	0	0	0	0	0	0	0	0	0	0	0	0	0	0	0	0	0
hsa:113	1	0	0	0	0	0	0	0	0	0	0	0	0	0	0	0	0	0	0	0	0	0	0	0	0	0	0	0	0	0	0	0	0	0	0	0	0	0	0	0	0	0	0	0	0	0	0	0	0
hsa:11330	0	0	0	0	0	0	0	0	0	0	0	0	0	0	0	0	0	0	0	0	0	0	0	0	0	0	0	0	0	0	0	0	0	0	0	0	0	0	0	0	0	0	0	0	0	0	0	0	0
hsa:11343	0	0	0	0	0	0	0	0	0	0	0	0	0	0	0	0	0	0	0	0	0	0	0	0	0	0	0	0	0	0	0	0	0	0	0	0	0	0	0	0	0	0	0	0	0	0	0	0	0
hsa:114	1	0	0	0	0	0	0	0	0	0	0	0	0	0	0	0	0	0	0	0	0	0	0	0	0	0	0	0	0	0	0	0	0	0	0	0	0	0	0	0	0	0	0	0	0	0	0	0	0
hsa:1147	0	0	0	0	0	0	0	0	0	0	0	0	0	0	0	0	0	0	0	0	0	0	0	0	0	0	0	0	0	0	0	0	0	0	0	0	0	0	0	0	0	0	0	0	0	0	0	0	0
hsa:115	1	0	0	0	0	0	0	0	0	0	0	0	0	0	0	0	0	0	0	0	0	0	0	0	0	0	0	0	0	0	0	0	0	0	0	0	0	0	0	0	0	0	0	0	0	0	0	0	0
hsa:116447	0	0	0	0	0	0	0	0	0	0	0	0	0	0	0	0	0	0	0	0	0	0	0	0	0	0	0	0	0	0	0	0	0	0	0	0	0	0	0	0	0	0	0	0	0	0	0	0	0
hsa:1178	0	0	0	0	0	0	0	0	0	0	0	0	0	0	0	0	0	0	0	0	0	0	0	0	0	0	0	0	0	0	0	0	0	0	0	0	0	0	0	0	0	0	0	0	0	0	0	0	0
hsa:1200	0	0	0	0	0	0	0	0	0	0	0	0	0	0	0	1	0	0	0	0	0	0	0	0	0	0	0	0	0	0	0	0	0	0	0	0	0	0	0	0	0	0	0	0	0	0	0	0	0
hsa:1215	0	0	0	0	0	0	0	0	0	0	0	0	0	0	0	1	0	0	0	0	0	0	0	0	0	0	0	0	0	0	0	0	0	0	0	0	0	0	0	0	0	0	0	0	0	0	0	0	0
hsa:124	1	0	0	0	0	0	0	0	0	0	0	0	0	0	0	0	0	0	0	0	0	0	0	0	0	0	0	0	0	0	0	0	0	0	0	0	0	0	0	0	0	0	0	0	0	0	0	0	0
hsa:125	1	0	0	0	0	0	0	0	0	0	0	0	0	0	0	0	0	0	0	0	0	0	0	0	0	0	0	0	0	0	0	0	0	0	0	0	0	0	0	0	0	0	0	0	0	0	0	0	0
hsa:126	1	0	0	0	0	0	0	0	0	0	0	0	0	0	0	0	0	0	0	0	0	0	0	0	0	0	0	0	0	0	0	0	0	0	0	0	0	0	0	0	0	0	0	0	0	0	0	0	0
hsa:1267	0	0	0	0	0	0	0	0	0	0	0	0	0	0	0	0	0	0	0	0	0	0	0	0	0	0	0	0	0	0	0	0	0	0	0	0	0	0	0	0	0	0	0	0	0	0	0	0	0
hsa:128	1	0	0	0	0	0	0	0	0	0	0	0	0	0	0	0	0	0	0	0	0	0	0	0	0	0	0	0	0	0	0	0	0	0	0	0	0	0	0	0	0	0	0	0	0	0	0	0	0
hsa:128853	0	0	0	0	0	0	0	0	0	0	0	0	0	0	0	0	0	0	0	0	0	0	0	0	0	0	0	0	1	0	0	0	0	0	0	0	0	0	0	0	0	0	0	0	0	0	0	0	0
hsa:129807	0	0	0	0	0	0	0	0	0	0	0	0	0	0	0	0	0	0	0	0	0	0	0	0	0	0	0	0	0	0	0	0	0	0	0	0	0	0	0	0	0	0	0	0	0	0	0	0	0
hsa:13	0	0	0	0	0	0	0	0	0	0	0	0	0	0	0	0	0	0	0	0	0	0	0	0	0	0	0	0	0	0	0	0	0	0	0	0	0	0	0	0	0	0	0	0	0	0	0	0	0
hsa:130399	0	0	0	0	0	0	0	0	0	0	0	0	0	0	0	0	0	0	0	0	0	0	0	0	0	0	0	0	0	0	0	0	0	0	0	0	0	0	0	0	0	0	0	0	0	0	0	0	0
hsa:131	1	0	0	0	0	0	0	0	0	0	0	0	0	0	0	0	0	0	0	0	0	0	0	0	0	0	0	0	0	0	0	0	0	0	0	0	0	0	0	0	0	0	0	0	0	0	0	0	0
hsa:1312	0	0	0	0	0	0	0	0	0	0	0	0	0	0	0	0	0	0	0	0	0	0	0	0	0	0	0	0	0	0	0	0	0	0	0	0	0	0	0	0	0	0	0	0	0	0	0	0	0
hsa:132	0	0	0	0	0	0	0	0	0	0	0	0	0	0	0	0	0	0	0	0	0	0	0	0	0	0	0	0	0	0	0	0	0	0	0	0	0	0	0	0	0	0	0	0	0	0	0	0	0
hsa:132160	0	0	0	0	0	0	0	0	0	0	0	0	0	0	0	0	0	0	0	0	0	0	0	0	0	0	0	0	1	0	0	0	0	0	0	0	0	0	0	0	0	0	0	0	0	0	0	0	0
hsa:133121	0	0	0	0	0	0	0	0	0	0	0	0	0	0	0	0	0	0	0	0	0	0	0	0	0	0	0	0	0	0	0	0	0	0	0	0	0	0	0	0	0	0	0	0	0	0	0	0	0
hsa:134510	0	0	0	0	0	0	0	0	0	0	0	0	0	0	0	0	0	0	0	0	0	0	0	0	0	0	0	0	1	0	0	0	0	0	0	0	0	0	0	0	0	0	0	0	0	0	0	0	0
hsa:1360	0	0	0	0	0	0	0	0	0	0	0	1	0	0	0	0	0	0	0	0	0	0	0	0	0	0	0	0	0	0	0	0	0	0	0	0	0	0	0	0	0	0	0	0	0	0	0	0	0
hsa:1363	0	0	0	0	0	0	0	0	0	0	0	0	0	0	0	0	0	0	0	1	0	0	0	0	0	0	0	0	0	0	0	0	0	0	0	0	0	0	0	0	0	0	0	0	0	0	0	0	0
hsa:1374	0	0	0	0	0	0	0	0	0	0	0	0	0	0	0	0	0	0	0	0	0	0	0	0	0	0	0	0	0	0	0	0	0	0	0	0	0	0	0	0	0	0	0	0	0	0	0	0	0
hsa:1376	0	0	0	0	0	0	0	0	0	0	0	0	0	0	0	0	0	0	0	0	0	0	0	0	0	0	0	0	0	0	0	0	0	0	0	0	0	0	0	0	0	0	0	0	0	0	0	0	0
hsa:1384	0	0	0	0	0	0	0	0	0	0	0	0	0	0	0	0	0	0	0	0	0	0	0	0	0	0	0	0	0	0	0	0	0	0	0	0	0	0	0	0	0	0	0	0	0	0	0	0	0
hsa:142679	0	0	0	0	0	0	0	0	0	0	0	0	0	0	0	0	0	0	0	0	0	0	0	0	0	0	0	0	1	0	0	0	0	0	0	0	0	0	0	0	0	0	0	0	0	0	0	0	0
hsa:1429	0	0	0	0	0	0	0	0	0	0	0	0	0	0	0	0	0	0	0	0	0	0	0	0	0	0	0	0	0	0	0	0	0	0	0	0	0	0	0	0	0	0	0	0	0	0	0	0	0
hsa:1431	0	0	0	0	0	0	0	0	0	0	0	1	0	0	0	0	0	0	0	0	0	0	0	0	0	0	0	0	0	0	0	0	0	0	0	0	0	0	0	0	0	0	0	0	0	0	0	0	0
hsa:1432	0	0	0	0	0	0	0	0	0	0	0	0	0	0	0	0	0	0	0	0	0	0	0	0	0	0	0	0	0	0	0	0	0	0	0	0	0	0	0	0	0	0	0	0	0	0	0	0	0
hsa:1436	0	0	0	0	0	0	0	0	0	0	0	0	0	0	0	0	0	0	0	0	0	0	0	0	0	0	0	0	0	0	0	0	0	0	0	0	0	0	0	0	0	0	0	0	0	0	0	0	0
hsa:1445	0	0	0	0	0	0	0	0	0	0	0	0	0	0	0	0	0	0	0	0	0	0	0	0	0	0	0	0	0	0	0	0	0	0	0	0	0	0	0	0	0	0	0	0	0	0	0	0	0
hsa:150290	0	0	0	0	0	0	0	0	0	0	0	0	0	0	0	0	0	0	0	0	0	0	0	0	0	0	0	0	1	0	0	0	0	0	0	0	0	0	0	0	0	0	0	0	0	0	0	0	0
hsa:1504	0	0	0	0	0	0	0	0	0	0	0	0	0	0	0	0	0	0	0	0	0	0	0	0	0	0	0	0	0	0	0	0	0	0	0	0	0	0	0	0	0	0	0	0	0	0	0	0	0
hsa:151531	0	0	0	0	0	0	0	0	0	0	0	0	0	0	0	0	0	0	0	0	0	0	0	0	0	0	0	0	0	0	0	0	0	0	0	0	0	0	0	0	0	0	0	0	0	0	0	0	0
hsa:1537	0	0	0	0	0	0	0	0	0	0	0	0	0	0	0	0	0	0	0	0	0	0	0	0	0	0	0	0	0	0	0	0	0	0	0	0	0	0	0	0	0	0	0	0	0	0	0	0	0
hsa:1543	0	0	0	0	0	0	0	0	0	0	0	0	0	0	0	0	0	0	0	0	0	0	0	0	0	0	0	0	0	0	0	0	0	0	0	0	0	0	0	0	0	0	0	0	0	0	0	0	0
hsa:1544	0	0	0	0	0	0	0	0	0	0	0	0	0	0	0	0	0	0	0	0	0	0	0	0	0	0	0	0	0	0	0	0	0	0	0	0	0	0	0	0	1	0	0	0	0	0	0	0	0
hsa:1545	0	0	0	0	0	0	0	0	0	0	0	0	0	0	0	0	0	0	0	0	0	0	0	0	0	0	0	0	0	0	0	0	0	0	0	0	0	0	0	0	1	0	0	0	0	0	0	0	0
hsa:1548	0	0	0	0	0	0	0	0	0	0	0	0	0	0	0	0	0	0	0	0	0	0	0	0	0	0	0	0	0	0	0	0	0	0	0	0	0	0	0	0	1	0	0	0	0	0	0	0	0
hsa:1549	0	0	0	0	0	0	0	0	0	0	0	0	0	0	0	0	0	0	0	0	0	0	0	0	0	0	0	0	0	0	0	0	0	0	0	0	0	0	0	0	1	0	0	0	0	0	0	0	0
hsa:1551	0	0	0	0	0	0	0	0	0	0	0	0	0	0	0	0	0	0	0	0	0	0	0	0	0	0	0	0	0	0	0	0	0	0	0	0	0	0	0	0	1	0	0	0	0	0	0	0	0
hsa:1553	0	0	0	0	0	0	0	0	0	0	0	0	0	0	0	0	0	0	0	0	0	0	0	0	0	0	0	0	0	0	0	0	0	0	0	0	0	0	0	0	1	0	0	0	0	0	0	0	0
hsa:1555	0	0	0	0	0	0	0	0	0	0	0	0	0	0	0	0	0	0	0	0	0	0	0	0	0	0	0	0	0	0	0	0	0	0	0	0	0	0	0	0	1	0	0	0	0	0	0	0	0
hsa:1557	0	0	0	0	0	0	0	0	0	0	0	0	0	0	0	0	0	0	0	0	0	0	0	0	0	0	0	0	0	0	0	0	0	0	0	0	0	0	0	0	1	0	0	0	0	0	0	0	0
hsa:1558	0	0	0	0	0	0	0	0	0	0	0	0	0	0	0	0	0	0	0	0	0	0	0	0	0	0	0	0	0	0	0	0	0	0	0	0	0	0	0	0	1	0	0	0	0	0	0	0	0
hsa:1559	0	0	0	0	0	0	0	0	0	0	0	0	0	0	0	0	0	0	0	0	0	0	0	0	0	0	0	0	0	0	0	0	0	1	0	0	0	0	0	0	1	0	0	0	0	0	0	0	0
hsa:1562	0	0	0	0	0	0	0	0	0	0	0	0	0	0	0	0	0	0	0	0	0	0	0	0	0	0	0	0	0	0	0	0	0	0	0	0	0	0	0	0	1	0	0	0	0	0	0	0	0
hsa:1565	0	0	0	0	0	0	0	0	0	0	0	0	0	0	0	0	0	0	0	0	0	0	0	0	0	0	0	0	0	0	0	0	0	0	0	0	0	0	0	0	1	0	0	0	0	0	0	0	0
hsa:1571	0	0	0	0	0	0	0	0	0	0	0	0	0	0	0	0	0	0	0	0	0	0	0	0	0	0	0	0	0	0	0	0	0	0	0	0	0	1	0	0	1	0	0	0	0	0	0	0	0
hsa:1572	0	0	0	0	0	0	0	0	0	0	0	0	0	0	0	0	0	0	0	0	0	0	0	0	0	0	0	0	0	0	0	0	0	0	0	0	0	0	0	0	1	0	0	0	0	0	0	0	0
hsa:1573	0	0	0	0	0	0	0	0	0	0	0	0	0	0	0	0	0	0	0	0	0	0	0	0	0	0	0	0	0	0	0	0	0	0	0	0	0	0	0	0	1	0	0	0	0	0	0	0	0
hsa:1576	0	0	0	0	0	0	0	0	0	0	0	0	0	0	0	0	0	0	0	0	0	0	0	0	0	0	0	0	0	0	0	0	0	0	0	0	0	0	0	1	1	0	0	0	0	0	0	0	0
hsa:1577	0	0	0	0	0	0	0	0	0	0	0	0	0	0	0	0	0	0	0	0	0	0	0	0	0	0	0	0	0	0	0	0	0	0	0	0	0	0	0	0	1	0	0	0	0	0	0	0	0
hsa:1579	0	0	0	0	0	0	0	0	0	0	0	0	0	0	0	0	0	0	0	0	0	0	0	0	0	0	0	0	0	0	0	0	0	0	0	0	0	0	0	0	1	0	0	0	0	0	0	0	0
hsa:1580	0	0	0	0	0	0	0	0	0	0	0	0	0	0	0	0	0	0	0	0	0	0	0	0	0	0	0	0	0	0	0	0	0	0	0	0	0	0	0	0	1	0	0	0	0	0	0	0	0
hsa:1581	0	0	0	0	0	0	0	0	0	0	0	0	0	0	0	0	0	0	0	0	0	0	0	0	0	0	0	0	0	0	0	0	0	0	0	0	0	0	0	0	1	0	0	0	0	0	0	0	0
hsa:1582	0	0	0	0	0	0	0	0	0	0	0	0	0	0	0	0	0	0	0	0	0	0	0	0	0	0	0	0	0	0	0	0	0	0	0	0	0	0	0	0	1	0	0	0	0	0	0	0	0
hsa:1583	0	0	0	0	0	0	0	0	0	0	0	0	0	0	0	0	0	0	0	0	0	0	0	0	0	0	0	0	0	0	0	0	0	0	0	0	0	0	0	0	1	0	0	0	0	0	0	0	0
hsa:1584	0	0	0	0	0	0	0	0	0	0	0	0	0	0	0	0	0	0	0	0	0	0	0	0	0	0	0	0	0	0	0	0	0	0	0	0	0	0	0	0	1	0	0	0	0	0	0	0	0
hsa:1585	0	0	0	0	0	0	0	0	0	0	0	0	0	0	0	0	0	0	0	0	0	0	0	0	0	0	0	0	0	0	0	0	0	0	0	0	0	0	0	0	1	0	0	0	0	0	0	0	0
hsa:1586	0	0	0	0	0	0	0	0	0	0	0	0	0	0	0	0	0	0	0	0	0	0	0	0	0	0	0	0	0	0	0	0	0	0	0	0	0	0	0	0	1	0	0	0	0	0	0	0	0
hsa:1588	0	0	0	0	0	0	0	0	0	0	0	0	0	0	0	0	0	0	0	0	0	0	0	0	0	0	0	0	0	0	0	0	0	0	0	0	0	0	0	0	1	0	0	0	0	0	1	0	0
hsa:1589	0	0	0	0	0	0	0	0	0	0	0	0	0	0	0	0	0	0	0	0	0	0	0	0	0	0	0	0	0	0	0	0	0	0	0	0	0	0	0	0	1	0	0	0	0	0	0	0	0
hsa:1593	0	0	0	0	0	0	0	0	0	0	0	0	0	0	0	0	0	0	0	0	0	0	0	0	0	0	0	0	0	0	0	0	0	0	0	0	0	0	0	0	1	0	0	0	0	0	0	0	0
hsa:1594	0	0	0	0	0	0	0	0	0	0	0	0	0	0	0	0	0	0	0	0	0	0	0	0	0	0	0	0	0	0	0	0	0	0	0	1	0	0	0	0	1	0	0	0	0	0	0	0	0
hsa:1595	0	0	0	0	0	0	0	0	0	0	0	0	0	0	0	0	0	0	0	0	0	0	0	0	0	0	0	0	0	0	0	0	0	0	0	0	0	0	0	0	1	0	0	0	0	0	0	0	0
hsa:1610	0	1	0	0	0	0	0	0	0	0	0	0	1	0	0	0	0	0	0	0	0	0	0	0	0	0	0	0	0	0	0	0	0	0	0	0	0	0	0	0	0	0	0	0	0	0	0	0	0
hsa:1621	0	0	0	0	0	0	0	0	0	0	0	0	0	0	0	0	0	0	0	0	0	0	0	0	0	0	0	0	0	0	0	0	0	0	0	0	0	1	0	0	0	0	0	0	0	0	0	0	0
hsa:1633	0	0	0	0	0	0	0	0	0	0	0	0	0	0	0	0	0	0	0	0	0	0	0	0	0	0	0	0	0	0	0	0	0	0	0	0	0	0	0	0	0	0	0	0	0	0	0	0	0
hsa:1636	0	0	0	0	0	0	0	0	0	0	0	0	0	0	0	0	0	0	0	0	0	0	0	0	0	0	0	0	0	0	0	0	0	0	0	0	0	0	0	0	0	0	0	0	0	0	0	0	0
hsa:1645	0	0	0	0	0	0	0	0	0	0	0	0	0	0	0	0	0	0	0	0	0	0	0	0	0	0	0	0	0	0	0	0	0	0	0	0	0	0	0	1	0	0	0	0	0	0	0	0	0
hsa:1675	0	0	0	0	0	0	0	0	0	0	0	0	0	0	0	1	0	0	0	0	0	0	0	0	0	0	0	0	0	0	0	0	0	0	0	0	0	0	0	0	0	0	0	0	0	0	0	0	0
hsa:1719	0	0	0	0	0	0	0	0	0	0	0	0	0	0	0	0	0	0	0	0	0	0	0	0	0	0	0	0	0	0	0	0	0	0	0	0	0	0	0	0	0	0	1	1	0	0	0	0	0
hsa:1723	0	0	0	0	0	0	0	0	0	0	0	0	0	0	0	0	0	0	0	0	0	1	0	0	0	0	0	0	0	0	0	0	0	0	0	0	0	0	0	0	0	0	0	0	0	0	0	0	0
hsa:1725	1	0	0	0	0	0	0	0	0	0	0	0	0	0	0	0	0	0	0	0	0	0	0	0	0	0	0	0	0	0	0	0	0	0	0	0	0	0	0	0	0	0	0	0	0	0	0	0	0
hsa:1728	0	1	0	0	0	0	0	0	0	0	0	0	0	0	0	0	0	0	0	0	0	0	0	0	0	0	0	0	0	0	0	0	0	0	0	0	0	0	0	0	0	0	0	0	0	0	0	0	0
hsa:1733	0	0	0	0	0	0	0	0	0	0	0	0	0	0	0	0	0	0	0	0	0	0	0	0	0	0	0	0	0	0	0	0	0	0	0	0	0	0	0	0	0	0	0	0	0	0	0	0	0
hsa:1734	0	0	0	0	0	0	0	0	0	0	0	0	0	0	0	0	0	0	0	0	0	0	0	0	0	0	0	0	0	0	0	0	0	0	0	0	0	0	0	0	0	0	0	0	0	0	0	0	0
hsa:1735	0	0	0	0	0	0	0	0	0	0	0	0	0	0	0	0	0	0	0	0	0	0	0	0	0	0	0	0	0	0	0	0	0	0	0	0	0	0	0	0	0	0	0	0	0	0	0	0	0
hsa:18	0	0	0	0	0	0	0	0	0	0	0	0	0	0	0	0	0	0	0	0	0	0	0	0	0	0	0	0	0	0	0	0	0	0	0	0	0	0	0	0	0	0	0	0	0	0	0	0	0
hsa:1800	0	0	0	0	0	0	0	0	0	0	0	0	0	0	0	0	0	0	0	0	0	0	0	0	0	0	0	0	0	0	0	0	0	0	0	0	0	0	0	0	0	0	0	0	0	0	0	0	0
hsa:1803	0	0	0	0	0	0	0	0	0	0	0	0	0	0	0	1	0	0	0	0	0	0	0	0	0	0	0	0	0	0	0	0	0	0	0	0	0	0	0	0	0	0	0	0	0	0	0	0	0
hsa:1806	0	1	0	0	0	0	1	0	0	0	0	0	0	0	0	0	0	0	0	0	0	0	0	0	0	0	0	0	0	0	0	0	0	0	0	0	0	0	0	0	0	0	0	0	0	0	0	0	0
hsa:1843	0	0	0	0	0	0	0	0	0	0	0	0	0	0	0	0	0	0	0	0	0	0	0	0	0	0	0	0	1	0	0	0	0	0	0	0	0	0	0	0	0	0	0	0	0	0	0	0	0
hsa:1844	0	0	0	0	0	0	0	0	0	0	0	0	0	0	0	0	0	0	0	0	0	0	0	0	0	0	0	0	1	0	0	0	0	0	0	0	0	0	0	0	0	0	0	0	0	0	0	0	0
hsa:1845	0	0	0	0	0	0	0	0	0	0	0	0	0	0	0	0	0	0	0	0	0	0	0	0	0	0	0	0	1	0	0	0	0	0	0	0	0	0	0	0	0	0	0	0	0	0	0	0	0
hsa:1846	0	0	0	0	0	0	0	0	0	0	0	0	0	0	0	0	0	0	0	0	0	0	0	0	0	0	0	0	1	0	0	0	0	0	0	0	0	0	0	0	0	0	0	0	0	0	0	0	0
hsa:1847	0	0	0	0	0	0	0	0	0	0	0	0	0	0	0	0	0	0	0	0	0	0	0	0	0	0	0	0	1	0	0	0	0	0	0	0	0	0	0	0	0	0	0	0	0	0	0	0	0
hsa:1848	0	0	0	0	0	0	0	0	0	0	0	0	0	0	0	0	0	0	0	0	0	0	0	0	0	0	0	0	1	0	0	0	0	0	0	0	0	0	0	0	0	0	0	0	0	0	0	0	0
hsa:1849	0	0	0	0	0	0	0	0	0	0	0	0	0	0	0	0	0	0	0	0	0	0	0	0	0	0	0	0	1	0	0	0	0	0	0	0	0	0	0	0	0	0	0	0	0	0	0	0	0
hsa:1850	0	0	0	0	0	0	0	0	0	0	0	0	0	0	0	0	0	0	0	0	0	0	0	0	0	0	0	0	1	0	0	0	0	0	0	0	0	0	0	0	0	0	0	0	0	0	0	0	0
hsa:1852	0	0	0	0	0	0	0	0	0	0	0	0	0	0	0	0	0	0	0	0	0	0	0	0	0	0	0	0	1	0	0	0	0	0	0	0	0	0	0	0	0	0	0	0	0	0	0	0	0
hsa:189	0	0	0	0	0	0	0	0	0	0	0	0	0	0	0	0	0	0	0	0	0	0	0	0	0	0	0	0	0	0	0	0	0	0	0	0	0	0	0	0	0	0	0	0	0	0	0	0	0
hsa:1890	0	0	0	0	0	0	0	0	0	0	0	0	0	0	0	0	0	0	0	0	0	0	0	0	0	0	0	0	0	0	0	0	0	0	0	0	0	0	0	0	0	0	0	0	0	0	0	0	0
hsa:191	1	0	0	0	0	0	0	0	0	0	0	0	0	0	0	0	0	0	0	0	0	0	0	0	0	0	0	0	0	0	0	0	0	0	0	0	0	0	0	0	0	0	0	0	0	0	0	0	0
hsa:1956	0	0	0	0	0	0	0	0	0	0	0	0	0	0	0	0	0	0	0	0	0	0	0	0	0	0	0	0	0	0	0	0	0	0	0	0	0	0	0	0	0	0	0	0	0	0	0	0	0
hsa:196883	1	0	0	0	0	0	0	0	0	0	0	0	0	0	0	0	0	0	0	0	0	0	0	0	0	0	0	0	0	0	0	0	0	0	0	0	0	0	0	0	0	0	0	0	0	0	0	0	0
hsa:1969	0	0	0	0	0	0	0	0	0	0	0	0	0	0	0	0	0	0	0	0	0	0	0	0	0	0	0	0	0	0	0	0	0	0	0	0	0	0	0	0	0	0	0	0	0	0	0	0	0
hsa:1990	0	0	0	0	0	0	0	0	0	0	0	0	0	0	0	0	0	0	0	0	0	0	0	0	0	0	0	0	0	0	0	0	0	0	0	0	0	0	0	0	0	0	0	0	0	0	0	0	0
hsa:1991	0	0	0	0	0	0	0	0	0	0	0	0	0	0	0	0	0	0	0	0	0	0	0	0	0	0	0	0	0	0	0	0	0	0	0	0	0	0	0	0	0	0	0	0	0	0	0	0	0
hsa:199974	0	0	0	0	0	0	0	0	0	0	0	0	0	0	0	0	0	0	0	0	0	0	0	0	0	0	0	0	0	0	0	0	0	0	0	0	0	0	0	0	1	0	0	0	0	0	0	0	0
hsa:2041	0	0	0	0	0	0	0	0	0	0	0	0	0	0	0	0	0	0	0	0	0	0	0	0	0	0	0	0	0	0	0	0	0	0	0	0	0	0	0	0	0	0	0	0	0	0	0	0	0
hsa:2042	0	0	0	0	0	0	0	0	0	0	0	0	0	0	0	0	0	0	0	0	0	0	0	0	0	0	0	0	0	0	0	0	0	0	0	0	0	0	0	0	0	0	0	0	0	0	0	0	0
hsa:2043	0	0	0	0	0	0	0	0	0	0	0	0	0	0	0	0	0	0	0	0	0	0	0	0	0	0	0	0	0	0	0	0	0	0	0	0	0	0	0	0	0	0	0	0	0	0	0	0	0
hsa:2044	0	0	0	0	0	0	0	0	0	0	0	0	0	0	0	0	0	0	0	0	0	0	0	0	0	0	0	0	0	0	0	0	0	0	0	0	0	0	0	0	0	0	0	0	0	0	0	0	0
hsa:2045	0	0	0	0	0	0	0	0	0	0	0	0	0	0	0	0	0	0	0	0	0	0	0	0	0	0	0	0	0	0	0	0	0	0	0	0	0	0	0	0	0	0	0	0	0	0	0	0	0
hsa:2046	0	0	0	0	0	0	0	0	0	0	0	0	0	0	0	0	0	0	0	0	0	0	0	0	0	0	0	0	0	0	0	0	0	0	0	0	0	0	0	0	0	0	0	0	0	0	0	0	0
hsa:2047	0	0	0	0	0	0	0	0	0	0	0	0	0	0	0	0	0	0	0	0	0	0	0	0	0	0	0	0	0	0	0	0	0	0	0	0	0	0	0	0	0	0	0	0	0	0	0	0	0
hsa:2048	0	0	0	0	0	0	0	0	0	0	0	0	0	0	0	0	0	0	0	0	0	0	0	0	0	0	0	0	0	0	0	0	0	0	0	0	0	0	0	0	0	0	0	0	0	0	0	0	0
hsa:2049	0	0	0	0	0	0	0	0	0	0	0	0	0	0	0	0	0	0	0	0	0	0	0	0	0	0	0	0	0	0	0	0	0	0	0	0	0	0	0	0	0	0	0	0	0	0	0	0	0
hsa:2050	0	0	0	0	0	0	0	0	0	0	0	0	0	0	0	0	0	0	0	0	0	0	0	0	0	0	0	0	0	0	0	0	0	0	0	0	0	0	0	0	0	0	0	0	0	0	0	0	0
hsa:2051	0	0	0	0	0	0	0	0	0	0	0	0	0	0	0	0	0	0	0	0	0	0	0	0	0	0	0	0	0	0	0	0	0	0	0	0	0	0	0	0	0	0	0	0	0	0	0	0	0
hsa:2058	0	0	0	0	0	0	0	0	0	1	0	0	0	0	0	0	0	0	0	0	0	0	0	0	0	0	0	0	0	0	0	0	0	0	0	0	0	0	0	0	0	0	0	0	0	0	0	0	0
hsa:2064	0	0	0	0	0	0	0	0	0	0	0	0	0	0	0	0	0	0	0	0	0	0	0	0	0	0	0	0	0	0	0	0	0	0	0	0	0	0	0	0	0	0	0	0	0	0	0	0	0
hsa:2065	0	0	0	0	0	0	0	0	0	0	0	0	0	0	0	0	0	0	0	0	0	0	0	0	0	0	0	0	0	0	0	0	0	0	0	0	0	0	0	0	0	0	0	0	0	0	0	0	0
hsa:2066	0	0	0	0	0	0	0	0	0	0	0	0	0	0	0	0	0	0	0	0	0	0	0	0	0	0	0	0	0	0	0	0	0	0	0	0	0	0	0	0	0	0	0	0	0	0	0	0	0
hsa:2098	0	0	0	0	0	0	0	0	0	0	0	0	0	0	0	1	0	0	0	0	0	0	0	0	0	0	0	0	0	0	0	0	0	0	0	0	0	0	0	0	0	0	0	0	0	0	0	0	0
hsa:2135	0	0	0	0	0	0	0	0	0	0	0	0	0	0	0	0	0	0	0	0	0	0	0	0	0	0	0	0	0	0	0	0	0	0	0	0	0	0	0	0	0	0	0	0	0	0	0	0	0
hsa:2147	0	0	0	0	0	0	0	0	0	0	0	0	0	0	0	0	0	0	0	0	0	0	0	0	0	0	0	0	0	0	0	0	0	0	0	0	0	0	0	0	0	0	0	0	0	0	0	0	0
hsa:2155	0	0	0	0	0	0	0	0	0	0	0	0	0	0	0	1	0	0	0	0	0	0	0	0	0	0	0	0	0	0	0	0	0	0	0	0	0	0	0	0	0	0	0	0	0	0	0	0	0
hsa:2158	0	0	0	0	0	0	0	0	0	0	0	0	0	0	0	1	0	0	0	0	0	0	0	0	0	0	0	0	0	0	0	0	0	0	0	0	0	0	0	0	0	0	0	0	0	0	0	0	0
hsa:2159	0	0	0	0	0	0	0	0	0	0	0	0	0	0	0	1	0	0	0	0	0	0	0	0	0	0	0	0	0	0	0	0	0	0	0	0	0	0	0	0	0	0	0	0	0	0	0	0	0
hsa:216	1	0	0	0	0	0	0	0	0	0	0	0	0	0	0	0	0	0	0	0	0	0	0	0	0	1	0	0	0	0	0	0	0	0	0	0	0	1	0	0	0	0	0	0	0	0	0	0	0
hsa:2160	0	0	0	0	0	0	0	0	0	0	0	0	0	0	0	1	0	0	0	0	0	0	0	0	0	0	0	0	0	0	0	0	0	0	0	0	0	0	0	0	0	0	0	0	0	0	0	0	0
hsa:2161	0	0	0	0	0	0	0	0	0	0	0	0	0	0	0	1	0	0	0	0	0	0	0	0	0	0	0	0	0	0	0	0	0	0	0	0	0	0	0	0	0	0	0	0	0	0	0	0	0
hsa:217	1	0	0	0	0	0	0	0	0	0	0	0	0	0	0	0	0	0	0	0	0	0	0	0	0	0	0	0	0	0	0	0	0	0	0	0	0	1	0	0	0	0	0	0	0	0	0	0	0
hsa:218	0	0	0	0	0	0	0	0	0	0	0	0	0	0	0	0	0	0	0	0	0	0	0	0	0	0	0	0	0	0	0	0	0	0	0	0	0	1	0	0	0	0	0	0	0	0	0	0	0
hsa:2180	0	0	0	0	0	0	0	0	0	0	0	0	0	0	0	0	0	0	0	0	0	0	0	0	0	0	0	0	0	0	0	0	0	0	0	0	0	0	0	0	0	0	0	0	0	0	0	0	0
hsa:2185	0	0	0	0	0	0	0	0	0	0	0	0	0	0	0	0	0	0	0	0	0	0	0	0	0	0	0	0	0	0	0	0	0	0	0	0	0	0	0	0	0	0	0	0	0	0	0	0	0
hsa:219	0	0	0	0	0	0	0	0	0	0	0	0	0	0	0	0	0	0	0	0	0	0	0	0	0	0	0	0	0	0	0	0	0	0	0	0	0	1	0	0	0	0	0	0	0	0	0	0	0
hsa:2193	0	0	0	0	0	1	0	0	0	0	0	0	0	0	0	0	0	0	0	0	0	0	0	0	0	0	0	0	0	0	0	0	0	0	0	0	0	0	0	0	0	0	0	0	0	0	0	0	0
hsa:2224	0	0	0	0	0	0	0	0	0	0	0	0	0	0	0	0	0	0	0	0	0	0	0	0	0	0	0	0	0	0	0	0	0	0	0	0	0	0	0	0	0	0	0	0	0	0	0	0	0
hsa:223	0	0	0	0	0	0	0	0	0	0	0	0	0	0	0	0	0	0	0	0	0	0	0	0	0	0	0	0	0	0	0	0	0	0	0	0	0	1	0	0	0	0	0	0	0	0	0	0	0
hsa:2232	0	1	0	0	0	0	0	0	0	0	0	0	0	0	0	0	0	0	0	0	0	0	0	0	0	0	0	0	0	0	0	0	0	0	0	0	0	0	0	0	0	0	0	0	0	0	0	0	0
hsa:2235	0	0	0	0	0	0	0	0	0	0	0	0	0	0	0	0	0	0	0	0	0	0	0	0	0	0	0	0	0	0	0	0	0	0	0	0	0	0	0	0	0	0	0	0	0	0	0	0	0
hsa:224	0	0	0	0	0	0	0	0	0	0	0	0	0	0	0	0	0	0	0	0	0	0	0	0	0	0	0	0	0	0	0	0	0	0	0	0	0	1	0	0	0	0	0	0	0	0	0	0	0
hsa:2241	0	0	0	0	0	0	0	0	0	0	0	0	0	0	0	0	0	0	0	0	0	0	0	0	0	0	0	0	0	0	0	0	0	0	0	0	0	0	0	0	0	0	0	0	0	0	0	0	0
hsa:2242	0	0	0	0	0	0	0	0	0	0	0	0	0	0	0	0	0	0	0	0	0	0	0	0	0	0	0	0	0	0	0	0	0	0	0	0	0	0	0	0	0	0	0	0	0	0	0	0	0
hsa:225689	0	0	0	0	0	0	0	0	0	0	0	0	0	0	0	0	0	0	0	0	0	0	0	0	0	0	0	0	0	0	0	0	0	0	0	0	0	0	0	0	0	0	0	0	0	0	0	0	0
hsa:2260	0	0	0	0	0	0	0	0	0	0	0	0	0	0	0	0	0	0	0	0	0	0	0	0	0	0	0	0	0	0	0	0	0	0	0	0	0	0	0	0	0	0	0	0	0	0	0	0	0
hsa:2261	0	0	0	0	0	0	0	0	0	0	0	0	0	0	0	0	0	0	0	0	0	0	0	0	0	0	0	0	0	0	0	0	0	0	0	0	0	0	0	0	0	0	0	0	0	0	0	0	0
hsa:2263	0	0	0	0	0	0	0	0	0	0	0	0	0	0	0	0	0	0	0	0	0	0	0	0	0	0	0	0	0	0	0	0	0	0	0	0	0	0	0	0	0	0	0	0	0	0	0	0	0
hsa:2264	0	0	0	0	0	0	0	0	0	0	0	0	0	0	0	0	0	0	0	0	0	0	0	0	0	0	0	0	0	0	0	0	0	0	0	0	0	0	0	0	0	0	0	0	0	0	0	0	0
hsa:2280	0	0	0	0	0	0	0	0	0	0	0	0	0	0	0	0	0	0	0	0	0	0	0	0	0	0	0	0	0	0	0	0	0	0	0	0	0	0	0	0	0	0	0	0	0	0	0	0	0
hsa:22843	0	0	0	0	0	0	0	0	0	0	0	0	0	0	0	0	0	0	0	0	0	0	0	0	0	0	0	0	1	0	0	0	0	0	0	0	0	0	0	0	0	0	0	0	0	0	0	0	0
hsa:22954	0	0	0	0	0	0	0	0	0	0	0	0	0	0	0	0	0	0	0	0	0	0	0	0	0	0	0	0	0	0	0	0	0	0	0	0	0	0	0	0	0	0	0	0	0	0	0	0	0
hsa:22978	0	0	0	0	0	0	0	0	0	0	0	0	0	0	0	0	0	0	0	0	0	0	0	0	0	0	0	0	0	0	0	0	0	0	0	0	0	0	0	0	0	0	0	0	0	0	0	0	0
hsa:23035	0	0	0	0	0	0	0	0	0	0	0	0	0	0	0	0	0	0	0	0	0	0	0	0	0	0	0	0	1	0	0	0	0	0	0	0	0	0	0	0	0	0	0	0	0	0	0	0	0
hsa:23097	0	0	0	0	0	0	0	0	0	0	0	0	0	0	0	0	0	0	0	0	0	0	0	0	0	0	0	0	0	0	0	0	0	0	0	0	0	0	0	0	0	0	0	0	0	0	0	0	0
hsa:231	0	0	0	0	0	0	0	0	0	0	0	1	0	0	0	0	0	0	0	0	0	0	0	0	0	0	0	0	0	0	0	0	0	0	0	0	0	0	0	1	0	0	0	0	0	0	0	0	0
hsa:2321	0	0	0	0	0	0	0	0	0	0	0	0	0	0	0	0	0	0	0	0	0	0	0	0	0	0	0	0	0	0	0	0	0	0	0	0	0	0	0	0	0	0	0	0	0	0	0	0	0
hsa:2322	0	0	0	0	0	0	0	0	0	0	0	0	0	0	0	0	0	0	0	0	0	0	0	0	0	0	0	0	0	0	0	0	0	0	0	0	0	0	0	0	0	0	0	0	0	0	0	0	0
hsa:23236	0	0	0	0	0	0	0	0	0	0	0	0	0	0	0	0	0	0	0	0	0	0	0	0	0	0	0	0	0	0	0	0	0	0	0	0	0	0	0	0	0	0	0	0	0	0	0	0	0
hsa:23239	0	0	0	0	0	0	0	0	0	0	0	0	0	0	0	0	0	0	0	0	0	0	0	0	0	0	0	0	1	0	0	0	0	0	0	0	0	0	0	0	0	0	0	0	0	0	0	0	0
hsa:2324	0	0	0	0	0	0	0	0	0	0	0	0	0	0	0	0	0	0	0	0	0	0	0	0	0	0	0	0	0	0	0	0	0	0	0	0	0	0	0	0	0	0	0	0	0	0	0	0	0
hsa:2326	0	1	0	0	0	0	0	0	0	0	0	0	0	0	0	0	0	0	0	0	0	0	0	0	0	0	0	0	0	0	0	0	0	0	0	0	0	0	0	0	0	0	0	0	0	0	0	0	0
hsa:2328	0	0	0	0	0	0	0	0	0	0	0	0	0	0	0	0	0	0	0	0	0	0	0	0	0	0	0	0	0	0	0	1	0	0	0	0	0	0	0	0	0	0	0	0	0	0	0	0	0
hsa:2339	0	0	0	0	0	0	0	0	0	0	0	0	0	0	0	0	0	0	0	0	0	0	0	0	0	0	0	0	0	0	0	0	0	0	0	0	0	0	0	0	0	0	0	0	0	0	0	0	0
hsa:2342	0	0	0	0	0	0	0	0	0	0	0	0	0	0	0	0	0	0	0	0	0	0	0	0	0	0	0	0	0	0	0	0	0	0	0	0	0	0	0	0	0	0	0	0	0	0	0	0	0
hsa:23430	0	0	0	0	0	0	0	0	0	0	0	0	0	0	0	1	0	0	0	0	0	0	0	0	0	0	0	0	0	0	0	0	0	0	0	0	0	0	0	0	0	0	0	0	0	0	0	0	0
hsa:23436	0	0	0	0	0	0	0	0	0	0	0	0	0	0	0	1	0	0	0	0	0	0	0	0	0	0	0	0	0	0	0	0	0	0	0	0	0	0	0	0	0	0	0	0	0	0	0	0	0
hsa:23475	0	0	0	0	0	0	0	0	0	0	0	0	0	0	0	0	0	1	0	0	0	0	0	0	0	0	0	0	0	0	0	0	0	0	0	0	0	0	0	0	0	0	0	0	0	0	0	0	0
hsa:2356	0	0	0	0	0	0	0	0	0	0	0	0	0	0	0	0	0	0	0	0	0	0	0	1	0	0	0	0	0	0	0	0	0	0	0	0	0	0	0	0	0	0	0	0	0	0	0	0	0
hsa:23632	0	0	0	0	0	0	0	0	0	0	0	0	0	0	0	0	0	0	0	0	0	0	0	0	0	0	0	0	0	0	0	0	0	0	0	0	0	0	0	0	0	0	0	0	0	0	0	0	0
hsa:238	0	0	0	0	0	0	0	0	0	0	0	0	0	0	0	0	0	0	0	0	0	0	0	0	0	0	0	0	0	0	0	0	0	0	0	0	0	0	0	0	0	0	0	0	0	0	0	0	0
hsa:239	0	0	0	0	0	0	0	0	0	0	0	0	0	0	0	0	0	0	0	0	0	0	0	0	0	0	1	0	0	0	1	0	0	1	0	0	0	0	1	0	0	1	0	0	0	0	0	0	0
hsa:240	0	0	0	0	0	0	0	0	0	0	0	0	0	0	0	0	0	0	0	0	0	0	0	0	0	0	1	0	0	0	1	0	0	1	0	0	0	0	1	0	0	1	0	0	0	0	0	0	0
hsa:242	0	0	0	0	0	0	0	0	0	0	0	0	0	0	0	0	0	0	0	0	0	0	0	0	0	0	1	0	0	0	1	0	0	1	0	0	0	0	1	0	0	1	0	0	0	0	0	0	0
hsa:246	0	0	0	0	0	0	0	0	0	0	0	0	0	0	0	0	0	0	0	0	0	0	0	0	0	0	1	0	0	0	1	0	0	0	0	0	0	0	1	0	0	1	0	0	0	0	0	0	0
hsa:247	0	0	0	0	0	0	0	0	0	0	0	0	0	0	0	0	0	0	0	0	0	0	0	0	0	0	1	0	0	0	1	0	0	0	0	0	0	0	1	0	0	1	0	0	0	0	0	0	0
hsa:25	0	0	0	0	0	0	0	0	0	0	0	0	0	0	0	0	0	0	0	0	0	0	0	0	0	0	0	0	0	0	0	0	0	0	0	0	0	0	0	0	0	0	0	0	0	0	0	0	0
hsa:2534	0	0	0	0	0	0	0	0	0	0	0	0	0	0	0	0	0	0	0	0	0	0	0	0	0	0	0	0	0	0	0	0	0	0	0	0	0	0	0	0	0	0	0	0	0	0	0	0	0
hsa:2548	0	0	0	0	0	0	0	0	0	0	0	0	0	0	0	0	0	0	0	0	0	0	0	0	0	0	0	0	0	0	0	0	0	0	0	0	0	0	0	0	0	0	0	0	0	0	0	0	0
hsa:25796	0	0	0	0	0	0	0	0	0	0	0	0	0	0	0	0	0	0	0	0	0	0	0	0	0	0	0	0	0	0	0	0	0	0	0	0	0	0	0	0	0	0	0	0	0	0	0	0	0
hsa:2582	1	0	0	0	0	0	0	0	0	0	0	0	0	0	0	0	0	0	0	0	0	0	0	0	0	0	0	0	0	0	0	0	0	0	0	0	0	0	0	0	0	0	0	0	0	0	0	0	0
hsa:25824	0	0	0	0	0	0	0	0	0	0	0	0	1	0	0	0	0	0	0	0	0	0	0	0	0	0	0	0	0	0	0	0	0	0	0	0	0	0	0	0	0	0	0	0	0	0	0	0	0
hsa:2595	0	0	0	0	0	0	0	0	0	0	0	0	0	0	0	0	0	0	0	0	0	0	0	0	0	0	0	0	0	0	0	0	0	0	0	0	0	0	0	0	0	0	0	0	0	0	0	0	0
hsa:2597	1	0	0	0	0	0	0	0	0	0	0	0	0	0	0	0	0	0	0	0	0	0	0	0	0	0	0	0	0	0	0	0	0	0	0	0	0	0	0	0	0	0	0	0	0	0	0	0	0
hsa:260293	0	0	0	0	0	0	0	0	0	0	0	0	0	0	0	0	0	0	0	0	0	0	0	0	0	0	0	0	0	0	0	0	0	0	0	0	0	0	0	0	1	0	0	0	0	0	0	0	0
hsa:26279	0	0	0	0	0	0	0	0	0	0	0	0	0	0	0	0	0	0	0	0	0	0	0	0	0	0	0	0	0	0	0	0	0	0	0	0	0	0	0	0	0	0	0	0	0	0	0	0	0
hsa:2638	0	0	0	0	0	0	0	0	0	0	0	0	0	0	0	0	0	0	0	0	0	0	0	0	0	0	0	0	0	0	0	0	0	0	0	0	0	0	0	0	0	0	0	0	0	0	0	0	0
hsa:2639	0	1	0	0	0	0	0	0	0	0	0	0	0	0	0	0	0	0	0	0	0	0	0	0	0	0	0	0	0	0	0	0	0	0	0	0	0	0	0	0	0	0	0	0	0	0	0	0	0
hsa:2673	0	0	0	0	0	0	0	0	0	0	0	0	0	0	0	0	0	0	0	0	0	0	0	0	0	0	0	0	0	0	0	0	0	0	0	0	0	0	0	0	0	0	0	0	0	0	0	0	0
hsa:2677	0	0	0	0	0	0	0	0	0	0	0	0	0	0	0	0	0	0	0	0	0	0	0	0	0	0	0	0	0	0	0	0	0	0	0	0	0	0	0	0	0	0	0	0	1	0	0	0	0
hsa:270	0	0	0	0	0	0	0	0	0	0	0	0	0	0	0	0	0	0	0	0	0	0	0	0	0	0	0	0	0	0	0	0	0	0	0	0	0	0	0	0	0	0	0	0	0	0	0	0	0
hsa:27032	0	0	0	0	0	0	0	0	0	0	0	0	0	0	0	0	0	0	0	0	0	0	0	0	0	0	0	0	0	0	0	0	0	0	0	0	0	0	0	0	0	0	0	0	0	0	0	0	0
hsa:27034	0	1	0	0	0	0	0	0	0	0	0	0	0	1	0	0	0	0	0	0	0	0	0	0	0	0	0	0	0	0	0	0	0	0	0	0	0	0	0	0	0	0	0	0	0	0	0	0	0
hsa:27115	0	0	0	0	0	0	0	0	0	0	0	0	0	0	0	0	0	0	0	0	0	0	0	0	0	0	0	0	0	0	0	0	0	0	0	0	0	0	0	0	0	0	0	0	0	0	0	0	0
hsa:2746	1	0	1	0	0	0	0	0	0	0	0	0	0	0	0	0	0	0	0	0	0	0	0	0	0	0	0	0	0	0	0	0	0	0	0	0	0	0	0	0	0	0	0	0	0	0	0	0	0
hsa:2766	0	0	0	0	0	0	0	0	0	0	0	0	0	0	0	0	0	0	0	0	0	0	0	0	0	0	0	0	0	0	0	0	0	0	0	0	0	0	0	0	0	0	0	0	0	0	0	0	0
hsa:279	0	0	0	0	0	0	0	0	0	0	0	0	0	0	0	0	0	0	0	0	0	0	0	0	0	0	0	0	0	0	0	0	0	0	0	0	0	0	0	0	0	0	0	0	0	0	0	0	0
hsa:28	0	0	0	0	0	0	0	0	0	0	0	0	0	0	0	0	0	0	0	0	0	0	0	0	0	0	0	0	0	0	0	0	0	0	0	0	0	0	0	0	0	0	0	0	0	0	0	0	0
hsa:2806	0	0	0	0	0	0	0	0	0	0	0	0	0	0	0	0	0	0	0	0	0	0	0	0	0	0	0	0	0	0	0	0	0	0	0	0	0	0	0	0	0	0	0	0	0	0	0	0	0
hsa:2822	0	0	0	0	0	0	0	0	0	0	0	0	0	0	0	0	0	0	0	0	0	0	0	0	0	0	0	0	0	0	0	0	0	0	0	0	0	0	0	0	0	0	0	0	0	0	0	0	0
hsa:28227	0	0	0	0	0	0	0	0	0	0	0	0	0	0	0	0	0	0	0	0	0	0	0	0	0	0	0	0	1	0	0	0	0	0	0	0	0	0	0	0	0	0	0	0	0	0	0	0	0
hsa:284541	0	0	0	0	0	0	0	0	0	0	0	0	0	0	0	0	0	0	0	0	0	0	0	0	0	0	0	0	0	0	0	0	0	0	0	0	0	0	0	0	1	0	0	0	0	0	0	0	0
hsa:285220	0	0	0	0	0	0	0	0	0	0	0	0	0	0	0	0	0	0	0	0	0	0	0	0	0	0	0	0	0	0	0	0	0	0	0	0	0	0	0	0	0	0	0	0	0	0	0	0	0
hsa:2876	0	0	0	0	0	0	0	0	0	0	0	0	0	0	0	0	0	0	0	0	0	0	0	0	0	0	0	0	0	0	0	0	0	0	0	0	0	0	0	0	0	0	0	0	0	0	0	0	0
hsa:2877	0	0	0	0	0	0	0	0	0	0	0	0	0	0	0	0	0	0	0	0	0	0	0	0	0	0	0	0	0	0	0	0	0	0	0	0	0	0	0	0	0	0	0	0	0	0	0	0	0
hsa:2878	0	0	0	0	0	0	0	0	0	0	0	0	0	0	0	0	0	0	0	0	0	0	0	0	0	0	0	0	0	0	0	0	0	0	0	0	0	0	0	0	0	0	0	0	0	0	0	0	0
hsa:2879	0	0	0	0	0	0	0	0	0	0	0	0	0	0	0	0	0	0	0	0	0	0	0	0	0	0	0	0	0	0	0	0	0	0	0	0	0	0	0	0	0	0	0	0	0	0	0	0	0
hsa:2880	0	0	0	0	0	0	0	0	0	0	0	0	0	0	0	0	0	0	0	0	0	0	0	0	0	0	0	0	0	0	0	0	0	0	0	0	0	0	0	0	0	0	0	0	0	0	0	0	0
hsa:2882	0	0	0	0	0	0	0	0	0	0	0	0	0	0	0	0	0	0	0	0	0	0	0	0	0	0	0	0	0	0	0	0	0	0	0	0	0	0	0	0	0	0	0	0	0	0	0	0	0
hsa:28972	0	0	0	0	0	0	0	0	0	0	0	0	0	0	0	1	0	0	0	0	0	0	0	0	0	0	0	0	0	0	0	0	0	0	0	0	0	0	0	0	0	0	0	0	0	0	0	0	0
hsa:2936	1	1	0	1	0	0	0	0	0	0	0	0	0	0	0	0	0	0	0	0	0	0	0	0	0	0	0	0	0	0	0	0	0	0	0	0	0	0	0	0	0	0	0	0	0	0	0	0	0
hsa:2950	0	0	0	1	0	0	0	0	0	0	0	0	0	0	0	0	0	0	0	0	0	0	0	0	0	0	0	0	0	0	0	0	0	0	0	0	0	0	0	0	0	0	0	0	0	0	0	0	0
hsa:29785	0	0	0	0	0	0	0	0	0	0	0	0	0	0	0	0	0	0	0	0	0	0	0	0	0	0	0	0	0	0	0	0	0	0	0	0	0	0	0	0	1	0	0	0	0	0	0	0	0
hsa:29920	0	0	0	0	0	0	0	0	0	1	0	0	0	0	0	0	0	0	0	0	0	0	0	0	0	0	0	0	0	0	0	0	0	0	0	0	0	0	0	0	0	0	0	0	0	0	0	0	0
hsa:29941	0	0	0	0	0	0	0	0	0	0	0	0	0	0	0	0	0	0	0	0	0	0	0	0	0	0	0	0	0	0	0	0	0	0	0	0	0	0	0	0	0	0	0	0	0	0	0	0	0
hsa:29968	0	0	0	0	0	0	0	0	0	0	0	0	0	0	0	0	0	0	0	0	0	0	0	0	0	0	0	0	0	0	0	0	0	0	0	0	0	0	0	0	0	0	0	0	0	0	0	0	0
hsa:30	0	0	0	0	0	0	0	0	0	0	0	0	0	0	0	0	0	0	0	0	0	0	0	0	0	0	0	0	0	0	0	0	0	0	0	0	0	0	0	0	0	0	0	0	0	0	0	0	0
hsa:3001	0	0	0	0	0	0	0	0	0	0	0	0	0	0	0	1	0	0	0	0	0	0	0	0	0	0	0	0	0	0	0	0	0	0	0	0	0	0	0	0	0	0	0	0	0	0	0	0	0
hsa:3002	0	0	0	0	0	0	0	0	0	0	0	0	0	0	0	1	0	0	0	0	0	0	0	0	0	0	0	0	0	0	0	0	0	0	0	0	0	0	0	0	0	0	0	0	0	0	0	0	0
hsa:3028	1	0	0	0	0	0	0	0	0	0	0	0	0	0	0	0	0	0	0	0	0	0	0	0	0	0	0	0	0	0	0	0	0	0	0	0	0	0	0	0	0	0	0	0	0	0	0	0	0
hsa:3033	1	0	0	0	0	0	0	0	0	0	0	0	0	0	0	0	0	0	0	0	0	0	0	0	0	0	0	0	0	0	0	0	0	0	0	0	0	0	0	0	0	0	0	0	0	0	0	0	0
hsa:3034	0	0	0	0	0	0	0	0	1	0	0	0	0	0	0	0	0	0	0	0	0	0	0	0	0	0	0	0	0	0	0	0	0	0	0	0	0	0	0	0	0	0	0	0	0	0	0	0	0
hsa:3035	0	0	0	0	0	0	0	0	1	0	0	0	0	0	0	0	0	0	0	0	0	0	0	0	0	0	0	0	0	0	0	0	0	0	0	0	0	0	0	0	0	0	0	0	0	0	0	0	0
hsa:3055	0	0	0	0	0	0	0	0	0	0	0	0	0	0	0	0	0	0	0	0	0	0	0	0	0	0	0	0	0	0	0	0	0	0	0	0	0	0	0	0	0	0	0	0	0	0	0	0	0
hsa:306	0	0	0	0	0	0	0	0	0	0	0	0	0	0	0	0	0	0	0	0	0	0	0	0	0	0	0	0	0	0	0	0	0	0	0	0	0	0	0	0	0	0	0	0	0	0	0	0	0
hsa:3067	0	0	0	0	0	0	0	0	1	0	0	0	0	0	0	0	0	0	0	0	0	0	0	0	0	0	0	0	0	0	0	0	0	0	0	0	0	0	0	0	0	0	0	0	0	0	0	0	0
hsa:30814	0	0	0	0	0	0	0	0	0	0	0	0	0	0	0	0	0	0	0	0	0	0	0	0	0	0	0	0	0	0	0	0	0	0	0	0	0	0	0	0	0	0	0	0	0	0	0	0	0
hsa:30833	0	0	0	0	0	0	0	0	0	0	0	0	0	0	0	0	0	0	0	0	0	0	0	0	0	0	0	0	0	0	0	0	0	0	0	0	0	0	0	0	0	0	0	0	0	0	0	0	0
hsa:31	0	0	1	0	0	0	1	1	0	0	0	0	0	0	0	0	0	0	0	0	0	0	0	0	0	0	0	0	0	0	0	0	0	0	0	0	0	0	0	0	0	0	0	0	0	0	0	0	0
hsa:313	0	0	0	0	0	0	0	0	0	0	0	0	0	0	0	0	0	0	0	0	0	0	0	0	0	0	0	0	0	0	0	0	0	0	0	0	0	0	0	0	0	0	0	0	0	0	0	0	0
hsa:3141	0	0	0	0	0	0	0	1	0	0	0	0	0	0	0	0	0	0	0	0	0	0	0	0	0	0	0	0	0	0	0	0	0	0	0	0	0	0	0	0	0	0	0	0	0	0	0	0	0
hsa:3156	0	0	0	0	0	0	0	0	0	0	0	0	0	0	0	0	0	0	0	0	0	0	0	0	0	0	0	0	0	0	0	0	0	0	0	0	0	0	0	0	0	0	0	0	0	0	0	0	0
hsa:32	0	0	0	0	0	0	0	1	0	0	0	0	0	0	0	0	0	0	0	0	0	0	0	0	0	0	0	0	0	0	0	0	0	0	0	0	0	0	0	0	0	0	0	0	0	0	0	0	0
hsa:326625	0	0	0	0	0	0	0	0	0	0	0	0	0	0	0	0	0	0	0	0	0	0	0	0	0	0	0	0	0	0	0	0	0	0	0	0	0	0	0	0	0	0	0	0	0	0	0	0	0
hsa:327	0	0	0	0	0	0	0	0	0	0	0	0	0	0	0	1	0	0	0	0	0	0	0	0	0	0	0	0	0	0	0	0	0	0	0	0	0	0	0	0	0	0	0	0	0	0	0	0	0
hsa:3283	0	0	0	0	0	0	0	0	0	0	0	0	0	0	0	0	0	0	0	0	0	0	0	0	0	0	0	0	0	0	0	0	0	0	0	0	0	0	0	0	0	0	0	0	0	0	0	0	0
hsa:3290	0	0	0	0	0	0	0	0	0	0	0	0	0	0	0	0	0	0	0	0	0	0	0	0	0	0	0	0	0	0	0	0	0	0	0	0	0	0	0	0	0	0	0	0	0	0	0	0	0
hsa:3291	0	0	0	0	0	0	0	0	0	0	0	0	0	0	0	0	0	0	0	0	0	0	0	0	0	0	0	0	0	0	0	0	0	0	0	0	0	0	0	0	0	0	0	0	0	0	0	0	0
hsa:3292	1	0	0	0	0	0	0	0	0	0	0	0	0	0	0	0	0	0	0	0	0	0	0	0	0	0	0	0	0	0	0	0	0	0	0	0	0	0	0	0	0	0	0	0	0	0	0	0	0
hsa:3295	1	0	0	0	0	0	0	0	0	0	0	0	0	0	0	0	0	0	0	0	0	0	0	0	0	0	0	0	0	0	0	0	0	0	0	0	0	0	0	0	0	0	0	0	0	0	0	0	0
hsa:3376	0	0	0	0	0	0	0	0	0	0	0	0	0	0	0	0	0	0	0	0	0	0	1	0	0	0	0	0	0	0	0	0	0	0	0	0	0	0	0	0	0	0	0	0	0	0	0	0	0
hsa:339221	0	0	0	0	0	0	0	0	0	0	0	0	0	0	0	0	0	0	0	0	0	0	0	0	0	0	0	0	0	0	0	0	0	0	0	0	0	0	0	0	0	0	0	0	0	0	0	0	0
hsa:34	0	1	0	0	0	0	0	0	0	0	0	0	0	0	0	0	0	0	0	0	0	0	0	0	0	0	0	0	0	0	0	0	0	0	0	0	0	0	0	0	0	0	0	0	0	0	0	0	0
hsa:3416	0	0	0	0	0	0	0	0	0	0	0	0	0	0	0	0	0	0	0	1	0	0	0	0	0	0	0	0	0	0	0	0	0	0	0	0	0	0	0	0	0	0	0	0	0	0	0	0	0
hsa:3480	0	0	0	0	0	0	0	0	0	0	0	0	0	0	0	0	0	0	0	0	0	0	0	0	0	0	0	0	0	0	0	0	0	0	0	0	0	0	0	0	0	0	0	0	0	0	0	0	0
hsa:349565	1	0	0	0	0	0	0	0	0	0	0	0	0	0	0	0	0	0	0	0	0	0	0	0	0	0	0	0	0	0	0	0	0	0	0	0	0	0	0	0	0	0	0	0	0	0	0	0	0
hsa:35	0	1	0	0	0	0	0	0	0	0	0	0	0	0	0	0	0	0	0	0	0	0	0	0	0	0	0	0	0	0	0	0	0	0	0	0	0	0	0	0	0	0	0	0	0	0	0	0	0
hsa:353	0	0	0	0	0	0	0	0	0	0	0	0	0	0	0	0	0	0	0	0	0	0	0	0	0	0	0	0	0	0	0	0	0	0	0	0	0	0	0	0	0	0	0	0	0	0	0	0	0
hsa:354	0	0	0	0	0	0	0	0	0	0	0	0	0	0	0	1	0	0	0	0	0	0	0	0	0	0	0	0	0	0	0	0	0	0	0	0	0	0	0	0	0	0	0	0	0	0	0	0	0
hsa:3551	0	0	0	0	0	0	0	0	0	0	0	0	0	0	0	0	0	0	0	0	0	0	0	0	0	0	1	0	0	0	0	1	0	0	0	0	0	0	0	0	0	0	0	0	0	0	0	0	0
hsa:36	0	0	0	0	0	0	0	0	0	0	0	0	0	0	0	0	0	0	0	0	0	0	1	0	0	0	0	0	0	0	0	0	0	0	0	0	0	0	0	0	0	0	0	0	0	0	0	0	0
hsa:3612	0	0	0	0	0	0	0	0	0	0	0	0	0	0	0	0	0	0	0	0	0	0	0	0	0	0	0	0	0	0	0	0	0	0	0	0	0	0	0	0	0	0	0	0	0	0	0	0	0
hsa:3614	0	0	0	0	0	0	0	0	0	0	0	0	0	0	0	0	0	0	0	0	0	0	0	0	0	0	0	0	0	0	0	0	0	0	0	0	0	0	0	0	0	0	0	0	0	0	0	0	0
hsa:3615	1	0	0	0	0	0	0	0	0	0	0	0	0	0	0	0	0	0	0	0	0	0	0	0	0	0	0	0	0	0	0	0	0	0	0	0	0	0	0	0	0	0	0	0	0	0	0	0	0
hsa:3643	0	0	0	0	0	0	0	0	0	0	0	0	0	0	0	0	0	0	0	0	0	0	0	0	0	0	0	0	0	0	0	0	0	0	0	0	0	0	0	0	0	0	0	0	0	0	0	0	0
hsa:3645	0	0	0	0	0	0	0	0	0	0	0	0	0	0	0	0	0	0	0	0	0	0	0	0	0	0	0	0	0	0	0	0	0	0	0	0	0	0	0	0	0	0	0	0	0	0	0	0	0
hsa:3702	0	0	0	0	0	0	0	0	0	0	0	0	0	0	0	0	0	0	0	0	0	0	0	0	0	0	0	0	0	0	0	0	0	0	0	0	0	0	0	0	0	0	0	0	0	0	0	0	0
hsa:3712	0	1	0	0	0	0	0	0	0	0	0	0	0	0	0	0	0	0	0	0	0	0	0	0	0	0	0	0	0	0	0	0	0	0	0	0	0	0	0	0	0	0	0	0	0	0	0	0	0
hsa:3716	0	0	0	0	0	0	0	0	0	0	0	0	0	0	0	0	0	0	0	0	0	0	0	0	0	0	0	0	0	0	0	0	0	0	0	0	0	0	0	0	0	0	0	0	0	0	0	0	0
hsa:3717	0	0	0	0	0	0	0	0	0	0	0	0	0	0	0	0	0	0	0	0	0	0	0	0	0	0	0	0	0	0	0	0	0	0	0	0	0	0	0	0	0	0	0	0	0	0	0	0	0
hsa:3718	0	0	0	0	0	0	0	0	0	0	0	0	0	0	0	0	0	0	0	0	0	0	0	0	0	0	0	0	0	0	0	0	0	0	0	0	0	0	0	0	0	0	0	0	0	0	0	0	0
hsa:3735	0	0	0	0	0	0	0	0	0	0	0	0	0	0	0	0	0	0	0	0	0	0	0	0	0	0	0	0	0	0	0	0	0	0	0	0	0	0	0	0	0	0	0	0	0	0	0	0	0
hsa:377677	0	0	0	0	0	0	0	0	0	0	0	0	0	0	0	0	0	0	0	0	0	0	0	0	0	0	0	0	0	0	0	0	0	0	0	0	0	0	0	0	0	0	0	0	0	0	0	0	0
hsa:3791	0	0	0	0	0	0	0	0	0	0	0	0	0	0	0	0	0	0	0	0	0	0	0	0	0	0	0	0	0	0	0	0	0	0	0	0	0	0	0	0	0	0	0	0	0	0	0	0	0
hsa:38	0	0	0	0	0	0	0	0	0	0	0	0	0	0	0	0	0	0	0	0	0	0	1	0	0	0	0	0	0	0	0	0	0	0	0	0	0	0	0	0	0	0	0	0	0	0	0	0	0
hsa:3815	0	0	0	0	0	0	0	0	0	0	0	0	0	0	0	0	0	0	0	0	0	0	0	0	0	0	0	0	0	0	0	0	0	0	0	0	0	0	0	0	0	0	0	0	0	0	0	0	0
hsa:3816	0	0	0	0	0	0	0	0	0	0	0	0	0	0	0	1	0	0	0	0	0	0	0	0	0	0	0	0	0	0	0	0	0	0	0	0	0	0	0	0	0	0	0	0	0	0	0	0	0
hsa:3817	0	0	0	0	0	0	0	0	0	0	0	0	0	0	0	1	0	0	0	0	0	0	0	0	0	0	0	0	0	0	0	0	0	0	0	0	0	0	0	0	0	0	0	0	0	0	0	0	0
hsa:3818	0	0	0	0	0	0	0	0	0	0	0	0	0	0	0	1	0	0	0	0	0	0	0	0	0	0	0	0	0	0	0	0	0	0	0	0	0	0	0	0	0	0	0	0	0	0	0	0	0
hsa:3906	0	0	0	0	0	0	0	0	0	0	0	0	0	0	0	0	0	0	0	0	0	0	0	0	0	0	0	0	0	0	0	0	0	1	0	0	0	0	1	0	0	0	0	0	0	0	0	0	0
hsa:390956	0	0	0	0	0	0	0	0	0	0	0	0	0	0	0	0	0	0	0	0	0	0	0	0	0	0	0	0	1	0	0	0	0	0	0	0	0	0	0	0	0	0	0	0	0	0	0	0	0
hsa:3932	0	0	0	0	0	0	0	0	0	0	0	0	0	0	0	0	0	0	0	0	0	0	0	0	0	0	0	0	0	0	0	0	0	0	0	0	0	0	0	0	0	0	0	0	0	0	0	0	0
hsa:3939	1	0	0	0	0	0	0	0	0	0	0	0	0	0	0	0	0	0	0	0	0	0	0	0	0	0	0	0	0	0	0	0	0	0	0	0	0	0	0	0	0	0	0	0	0	0	0	0	0
hsa:3945	1	0	0	0	0	0	0	0	0	0	0	0	0	0	0	0	0	0	0	0	0	0	0	0	0	0	0	0	0	0	0	0	0	0	0	0	0	0	0	0	0	0	0	0	0	0	0	0	0
hsa:3988	0	0	0	0	0	0	0	0	0	0	0	0	0	0	0	0	0	0	0	0	0	0	0	0	0	0	0	0	0	0	0	0	0	0	0	0	0	0	0	0	0	0	0	0	0	0	0	0	0
hsa:3990	0	0	0	0	0	0	0	0	0	0	0	0	0	0	0	0	0	0	0	0	0	0	0	0	0	0	0	0	0	0	0	0	0	0	0	0	0	0	0	0	0	0	0	0	0	0	0	0	0
hsa:3991	0	0	0	0	0	0	0	0	0	0	0	0	0	0	0	0	0	0	0	0	0	0	0	0	0	0	0	0	0	0	0	0	0	0	0	0	0	0	0	0	0	0	0	0	0	0	0	0	0
hsa:4017	0	0	0	0	0	0	0	0	0	0	0	0	0	0	0	0	0	0	0	0	0	0	0	0	0	0	0	0	0	0	0	0	0	0	0	0	0	0	0	0	0	0	0	0	0	0	0	0	0
hsa:4023	0	0	0	0	0	0	0	0	0	0	0	0	0	0	0	0	0	0	0	0	0	0	0	0	0	0	0	0	0	0	0	0	0	0	0	0	0	0	0	0	0	0	0	0	0	0	0	0	0
hsa:4025	0	0	0	0	0	0	0	0	0	0	0	0	0	0	0	0	0	0	0	0	0	0	0	0	0	0	1	0	0	0	0	0	0	0	0	0	0	0	0	0	0	0	0	0	0	0	0	0	0
hsa:4048	0	0	0	0	0	0	0	0	0	0	0	0	0	0	0	0	0	0	0	0	0	0	0	0	0	0	1	0	0	0	1	0	0	1	0	0	0	0	1	0	0	1	0	0	0	0	0	0	0
hsa:4051	0	0	0	0	0	0	0	0	0	0	0	0	0	0	0	0	0	0	0	0	0	0	0	0	0	0	0	0	0	0	0	0	0	0	0	0	0	0	0	0	1	0	0	0	0	0	0	0	0
hsa:4058	0	0	0	0	0	0	0	0	0	0	0	0	0	0	0	0	0	0	0	0	0	0	0	0	0	0	0	0	0	0	0	0	0	0	0	0	0	0	0	0	0	0	0	0	0	0	0	0	0
hsa:4067	0	0	0	0	0	0	0	0	0	0	0	0	0	0	0	0	0	0	0	0	0	0	0	0	0	0	0	0	0	0	0	0	0	0	0	0	0	0	0	0	0	0	0	0	0	0	0	0	0
hsa:4128	0	0	0	0	0	0	0	0	0	0	0	0	0	0	0	0	0	0	0	0	0	0	0	0	0	0	0	0	0	0	0	0	0	0	0	0	0	0	0	0	0	0	0	0	0	0	0	0	0
hsa:4129	0	1	0	0	0	0	0	0	0	0	0	0	0	0	0	0	0	0	0	0	0	0	0	0	0	0	0	0	0	0	0	0	0	0	0	0	0	0	0	0	0	0	0	0	0	0	0	0	0
hsa:4143	0	0	0	0	0	0	0	0	0	0	0	0	0	0	0	0	0	0	0	0	0	0	0	0	0	0	0	0	0	0	0	0	0	0	0	0	0	0	0	0	0	0	0	0	0	0	0	0	0
hsa:4145	0	0	0	0	0	0	0	0	0	0	0	0	0	0	0	0	0	0	0	0	0	0	0	0	0	0	0	0	0	0	0	0	0	0	0	0	0	0	0	0	0	0	0	0	0	0	0	0	0
hsa:4190	1	0	0	0	0	0	0	0	0	0	0	0	0	0	0	0	0	0	0	0	0	0	0	0	0	0	0	0	0	0	0	0	0	0	0	0	0	0	0	0	0	0	0	0	0	0	0	0	0
hsa:4191	0	0	0	0	0	0	0	0	0	0	0	1	0	0	0	0	0	0	0	0	0	0	0	0	0	0	0	0	0	0	0	0	0	0	0	0	0	0	0	0	0	0	0	0	0	0	0	0	0
hsa:4200	1	0	0	0	0	0	0	0	0	0	0	0	0	0	0	0	0	0	0	0	0	0	0	0	0	0	0	0	0	0	0	0	0	0	0	0	0	0	0	0	0	0	0	0	0	0	0	0	0
hsa:4233	0	0	0	0	0	0	0	0	0	0	0	0	0	0	0	0	0	0	0	0	0	0	0	0	0	0	0	0	0	0	0	0	0	0	0	0	0	0	0	0	0	0	0	0	0	0	0	0	0
hsa:4281	0	0	0	0	0	0	0	0	0	0	0	0	0	0	0	0	0	0	0	0	0	0	0	0	0	0	0	0	0	0	0	0	0	0	0	0	0	0	0	0	0	0	0	0	0	0	0	0	0
hsa:4282	0	0	0	0	0	0	0	0	0	0	0	1	0	0	0	0	0	0	0	0	0	0	0	0	0	0	0	0	0	0	0	0	0	0	0	0	0	0	0	0	0	0	0	0	0	0	0	0	0
hsa:43	0	0	0	0	0	0	0	0	0	0	0	0	0	0	0	1	0	0	0	0	0	0	0	0	0	0	0	0	0	0	0	0	0	0	0	0	0	0	0	0	0	0	0	0	0	0	0	0	0
hsa:4311	0	0	0	0	0	0	0	0	0	0	0	0	0	0	0	0	0	0	0	1	0	0	0	0	0	0	0	0	0	0	0	0	0	0	0	0	0	0	0	0	0	0	0	0	0	0	0	0	0
hsa:4329	0	0	0	0	0	0	0	0	0	0	0	0	0	1	0	0	0	0	0	0	0	0	0	0	0	0	0	0	0	0	0	0	0	0	0	0	0	0	0	0	0	0	0	0	0	0	0	0	0
hsa:4353	0	0	0	0	0	0	0	0	0	0	0	0	0	0	0	0	0	0	0	0	0	0	0	0	0	0	1	0	0	0	0	0	0	0	0	0	0	0	0	0	0	0	0	0	0	0	0	0	0
hsa:444	0	0	0	0	0	0	0	0	0	0	0	0	0	0	0	0	0	0	0	0	0	0	0	0	0	0	0	0	0	0	0	0	0	0	0	0	0	1	0	0	0	0	0	0	0	0	0	0	0
hsa:4482	0	0	0	0	0	0	0	0	0	0	0	0	0	0	0	0	0	0	0	0	0	0	0	0	0	0	0	0	0	0	0	0	0	0	0	0	0	0	0	0	0	0	0	0	0	0	0	0	0
hsa:4486	0	0	0	0	0	0	0	0	0	0	0	0	0	0	0	0	0	0	0	0	0	0	0	0	0	0	0	0	0	0	0	0	0	0	0	0	0	0	0	0	0	0	0	0	0	0	0	0	0
hsa:4548	0	0	0	0	0	0	0	0	0	0	0	0	0	0	0	0	0	0	0	0	0	0	0	0	0	0	0	0	0	0	0	0	0	0	0	0	0	0	0	0	0	0	0	0	0	0	0	0	0
hsa:4552	0	0	0	0	0	0	0	0	0	0	0	0	0	0	0	0	0	0	0	0	0	0	0	0	0	0	0	0	0	0	0	0	0	0	0	0	0	0	0	0	0	0	0	0	0	0	0	0	0
hsa:4593	0	0	0	0	0	0	0	0	0	0	0	0	0	0	0	0	0	0	0	0	0	0	0	0	0	0	0	0	0	0	0	0	0	0	0	0	0	0	0	0	0	0	0	0	0	0	0	0	0
hsa:4594	0	0	0	0	0	0	0	0	0	0	0	0	0	0	0	0	0	0	0	0	0	0	0	0	0	0	0	0	0	0	0	0	0	0	0	0	0	0	0	0	0	0	0	0	0	0	0	0	0
hsa:472	0	0	0	0	0	0	0	0	0	0	0	0	0	0	0	0	0	0	0	0	0	0	0	0	0	0	0	0	0	0	0	0	0	0	0	0	0	0	0	0	0	0	0	0	0	0	0	0	0
hsa:4758	0	0	0	0	0	0	0	0	0	0	0	0	0	0	0	0	0	0	0	0	0	0	0	0	0	0	0	0	0	0	0	0	0	0	0	0	0	0	0	0	0	0	0	0	0	0	0	0	0
hsa:4759	0	0	0	0	0	0	0	0	0	0	0	0	0	0	0	0	0	0	0	0	0	0	0	0	0	0	0	0	0	0	0	0	0	0	0	0	0	0	0	0	0	0	0	0	0	0	0	0	0
hsa:476	0	0	0	0	0	0	0	0	0	0	0	0	0	0	0	0	0	0	0	0	0	0	0	0	0	0	0	0	0	0	0	0	0	0	0	0	0	0	0	0	0	0	0	0	0	0	0	0	0
hsa:4835	0	1	0	0	0	0	0	0	0	0	0	0	0	0	0	0	0	0	0	0	0	0	0	0	0	0	0	0	0	0	0	0	0	0	0	0	0	0	0	0	0	0	0	0	0	0	0	0	0
hsa:4837	0	0	0	0	0	0	0	0	0	0	0	0	0	0	0	0	0	1	0	0	0	0	0	0	0	0	0	0	0	0	0	0	0	0	0	0	0	0	0	0	0	0	0	0	0	0	0	0	0
hsa:4860	0	0	0	0	0	0	0	0	0	0	0	0	0	0	0	0	0	0	0	0	1	0	0	0	0	0	0	0	0	0	0	0	0	0	0	0	0	0	0	0	0	0	0	0	0	0	0	0	0
hsa:4881	0	0	0	0	0	0	0	0	0	0	0	0	0	0	0	0	0	0	0	0	0	0	0	0	0	0	0	0	0	0	0	0	0	0	0	0	0	0	0	0	0	0	0	0	0	0	0	0	0
hsa:49	0	0	0	0	0	0	0	0	0	0	0	0	0	0	0	1	0	0	0	0	0	0	0	0	0	0	0	0	0	0	0	0	0	0	0	0	0	0	0	0	0	0	0	0	0	0	0	0	0
hsa:4907	0	0	0	0	0	0	0	0	0	0	0	0	0	0	0	0	0	0	0	0	0	0	0	0	0	0	0	0	0	0	0	0	0	0	0	0	0	0	0	0	0	0	0	0	0	0	0	0	0
hsa:4914	0	0	0	0	0	0	0	0	0	0	0	0	0	0	0	0	0	0	0	0	0	0	0	0	0	0	0	0	0	0	0	0	0	0	0	0	0	0	0	0	0	0	0	0	0	0	0	0	0
hsa:4915	0	0	0	0	0	0	0	0	0	0	0	0	0	0	0	0	0	0	0	0	0	0	0	0	0	0	0	0	0	0	0	0	0	0	0	0	0	0	0	0	0	0	0	0	0	0	0	0	0
hsa:4916	0	0	0	0	0	0	0	0	0	0	0	0	0	0	0	0	0	0	0	0	0	0	0	0	0	0	0	0	0	0	0	0	0	0	0	0	0	0	0	0	0	0	0	0	0	0	0	0	0
hsa:4919	0	0	0	0	0	0	0	0	0	0	0	0	0	0	0	0	0	0	0	0	0	0	0	0	0	0	0	0	0	0	0	0	0	0	0	0	0	0	0	0	0	0	0	0	0	0	0	0	0
hsa:4920	0	0	0	0	0	0	0	0	0	0	0	0	0	0	0	0	0	0	0	0	0	0	0	0	0	0	0	0	0	0	0	0	0	0	0	0	0	0	0	0	0	0	0	0	0	0	0	0	0
hsa:4921	0	0	0	0	0	0	0	0	0	0	0	0	0	0	0	0	0	0	0	0	0	0	0	0	0	0	0	0	0	0	0	0	0	0	0	0	0	0	0	0	0	0	0	0	0	0	0	0	0
hsa:4942	0	0	0	0	0	0	0	0	0	0	0	0	0	0	0	0	0	0	0	0	0	0	0	0	0	0	0	0	0	0	0	0	0	0	0	0	0	0	0	0	0	0	0	0	0	0	0	0	0
hsa:495	0	0	0	0	0	0	0	0	0	0	0	0	0	0	0	0	0	0	0	0	0	0	0	0	0	0	0	0	0	0	0	0	0	0	0	0	0	0	0	0	0	0	0	0	0	0	0	0	0
hsa:4953	0	0	0	0	0	0	0	0	0	0	0	0	0	0	0	0	0	0	0	0	0	0	0	0	0	0	0	0	0	0	0	0	0	0	0	0	0	0	0	0	0	0	0	0	0	0	0	0	0
hsa:50	0	0	0	0	0	0	0	0	0	0	0	1	0	0	0	0	0	0	0	0	0	0	0	0	0	0	0	0	0	0	0	0	0	0	0	0	0	0	0	0	0	0	0	0	0	0	0	0	0
hsa:501	0	0	0	0	0	0	0	0	0	0	0	0	0	0	0	0	0	0	0	0	0	0	0	0	0	0	0	0	0	0	0	0	0	0	0	0	0	1	0	0	0	0	0	0	0	0	0	0	0
hsa:5033	0	0	0	0	1	0	0	0	0	0	0	0	0	0	0	0	0	0	0	0	0	0	0	0	0	0	0	0	0	0	0	0	0	0	0	0	0	0	0	0	0	0	0	0	0	0	0	0	0
hsa:5045	0	0	0	0	0	0	0	0	0	0	0	0	0	0	0	1	0	0	0	0	0	0	0	0	0	0	0	0	0	0	0	0	0	0	0	0	0	0	0	0	0	0	0	0	0	0	0	0	0
hsa:50484	0	0	0	0	0	0	0	0	0	0	0	0	0	0	0	0	0	0	0	0	0	0	0	0	0	0	0	0	0	0	0	0	0	0	0	0	0	0	0	0	0	0	0	0	0	0	0	0	0
hsa:50487	0	0	0	0	0	0	0	0	0	0	0	0	0	0	0	0	0	0	0	0	0	0	0	0	0	0	0	0	0	0	0	0	0	0	0	0	0	0	0	0	0	0	0	0	0	0	0	0	0
hsa:5049	0	0	0	0	0	0	0	0	0	0	0	0	0	0	0	0	0	0	0	0	0	0	0	0	0	0	0	0	0	0	0	0	0	0	0	0	0	0	0	0	0	0	0	0	0	0	0	0	0
hsa:5050	0	0	0	0	0	0	0	0	0	0	0	0	0	0	0	0	0	0	0	0	0	0	0	0	0	0	0	0	0	0	0	0	0	0	0	0	0	0	0	0	0	0	0	0	0	0	0	0	0
hsa:5051	0	0	0	0	0	0	0	0	0	0	0	0	0	0	0	0	0	0	0	0	0	0	0	0	0	0	0	0	0	0	0	0	0	0	0	0	0	0	0	0	0	0	0	0	0	0	0	0	0
hsa:5052	0	0	0	0	0	0	0	0	0	0	0	0	0	0	0	0	0	0	0	0	0	0	0	0	0	0	0	0	0	0	0	0	0	0	0	0	0	0	0	0	0	0	0	0	0	0	0	0	0
hsa:5053	0	0	0	0	0	1	0	0	0	0	0	0	0	0	0	0	0	0	0	0	0	0	0	0	0	0	0	0	0	0	0	0	0	0	0	0	0	0	0	0	0	0	0	0	0	0	0	0	0
hsa:5091	0	0	0	0	0	0	0	1	0	0	0	0	0	0	0	0	0	0	0	0	0	0	0	0	0	0	0	0	0	0	0	0	0	0	0	0	0	0	0	0	0	0	0	0	0	0	0	0	0
hsa:50940	0	0	0	0	0	0	0	0	0	0	0	0	0	0	0	0	0	0	0	0	0	0	0	0	0	0	0	0	0	0	0	0	0	0	0	0	0	0	0	0	0	0	0	0	0	0	0	0	0
hsa:5095	0	0	0	0	0	0	0	1	0	0	0	0	0	1	1	0	0	0	0	0	0	0	1	0	0	0	0	0	0	0	0	0	0	0	0	0	0	0	0	0	0	0	0	0	0	0	0	0	0
hsa:5096	0	0	0	0	0	0	0	1	0	0	0	0	0	1	1	0	0	0	0	0	0	0	1	0	0	0	0	0	0	0	0	0	0	0	0	0	0	0	0	0	0	0	0	0	0	0	0	0	0
hsa:51	0	0	0	0	0	0	0	0	0	0	0	0	0	0	0	0	0	0	0	0	0	0	0	0	0	0	0	0	0	0	0	0	0	0	0	0	0	0	0	0	0	0	0	0	0	0	0	0	0
hsa:51004	0	0	0	0	0	0	0	0	0	0	0	0	0	0	0	0	0	0	0	0	0	0	0	0	0	0	0	0	0	0	0	0	0	0	0	0	0	0	0	0	1	0	0	0	0	0	0	0	0
hsa:51095	0	0	0	0	0	0	0	0	0	0	0	0	0	0	0	0	0	0	0	0	0	0	0	0	0	0	0	0	0	0	0	0	0	0	0	0	0	0	0	0	0	0	0	0	0	0	0	0	0
hsa:51166	0	0	0	0	0	0	0	0	0	0	0	0	0	0	0	0	0	0	0	0	0	0	0	0	0	0	0	0	0	0	0	0	0	0	0	0	0	0	0	0	0	0	0	0	0	0	0	0	0
hsa:51172	0	0	0	0	0	0	0	0	0	0	0	0	0	0	0	0	0	0	0	0	0	0	0	0	0	0	0	0	0	0	0	0	0	0	0	0	0	0	0	0	0	0	0	0	0	0	0	0	0
hsa:51181	0	0	0	0	0	0	0	0	0	0	0	0	0	0	0	0	0	0	0	0	0	0	0	0	0	0	0	0	0	0	0	0	0	0	0	0	0	0	0	1	0	0	0	0	0	0	0	0	0
hsa:51205	0	0	0	0	0	0	0	0	0	0	0	0	0	0	0	0	0	0	0	0	0	0	0	0	0	0	0	1	0	0	0	0	0	0	0	0	0	0	0	0	0	0	0	0	0	0	0	0	0
hsa:51207	0	0	0	0	0	0	0	0	0	0	0	0	0	0	0	0	0	0	0	0	0	0	0	0	0	0	0	0	1	0	0	0	0	0	0	0	0	0	0	0	0	0	0	0	0	0	0	0	0
hsa:5122	0	0	0	0	0	0	0	0	0	0	0	0	0	0	0	1	0	0	0	0	0	0	0	0	0	0	0	0	0	0	0	0	0	0	0	0	0	0	0	0	0	0	0	0	0	0	0	0	0
hsa:51251	0	0	0	0	0	0	0	0	0	0	0	0	0	0	0	0	0	0	0	0	0	0	0	0	0	0	0	0	0	0	0	0	0	0	0	0	0	0	0	0	0	0	0	0	0	0	0	0	0
hsa:5126	0	0	0	0	0	0	0	0	0	0	0	0	0	0	0	1	0	0	0	0	0	0	0	0	0	0	0	0	0	0	0	0	0	0	0	0	0	0	0	0	0	0	0	0	0	0	0	0	0
hsa:51292	0	0	0	0	0	0	0	0	0	0	0	0	0	0	0	0	0	0	0	0	0	0	0	0	0	0	0	0	0	0	0	0	0	0	0	0	0	0	0	0	0	0	0	0	0	0	0	0	0
hsa:513	0	0	0	0	0	0	0	0	0	0	0	0	0	0	0	0	0	0	0	0	0	0	0	0	0	0	0	0	0	0	0	0	0	0	0	0	0	0	0	0	0	0	0	0	0	0	0	0	0
hsa:51302	0	0	0	0	0	0	0	0	0	0	0	0	0	0	0	0	0	0	0	0	0	0	0	0	0	0	0	0	0	0	0	0	0	0	0	0	0	0	0	0	1	0	0	0	0	0	0	0	0
hsa:5136	0	0	0	0	0	0	0	0	0	0	0	0	0	0	0	0	0	0	0	0	0	0	0	0	0	0	0	0	0	0	0	0	0	0	0	0	0	0	0	0	0	0	0	0	0	0	0	0	0
hsa:51365	0	0	0	0	0	0	0	0	0	0	0	0	0	0	0	0	0	0	0	0	0	0	0	0	0	0	0	0	0	0	0	0	0	0	0	0	0	0	0	0	0	0	0	0	0	0	0	0	0
hsa:5137	0	0	0	0	0	0	0	0	0	0	0	0	0	0	0	0	0	0	0	0	0	0	0	0	0	0	0	0	0	0	0	0	0	0	0	0	0	0	0	0	0	0	0	0	0	0	0	0	0
hsa:5138	0	0	0	0	0	0	0	0	0	0	0	0	0	0	0	0	0	0	0	0	0	0	0	0	0	0	0	0	0	0	0	0	0	0	0	0	0	0	0	0	0	0	0	0	0	0	0	0	0
hsa:5140	0	0	0	0	0	0	0	0	0	0	0	0	0	0	0	0	0	0	0	0	0	0	0	0	0	0	0	0	0	0	0	0	0	0	0	0	0	0	0	0	0	0	0	0	0	0	0	0	0
hsa:5141	0	0	0	0	0	0	0	0	0	0	0	0	0	0	0	0	0	0	0	0	0	0	0	0	0	0	0	0	0	0	0	0	0	0	0	0	0	0	0	0	0	0	0	0	0	0	0	0	0
hsa:5142	0	0	0	0	0	0	0	0	0	0	0	0	0	0	0	0	0	0	0	0	0	0	0	0	0	0	0	0	0	0	0	0	0	0	0	0	0	0	0	0	0	0	0	0	0	0	0	0	0
hsa:5143	0	0	0	0	0	0	0	0	0	0	0	0	0	0	0	0	0	0	0	0	0	0	0	0	0	0	0	0	0	0	0	0	0	0	0	0	0	0	0	0	0	0	0	0	0	0	0	0	0
hsa:5144	0	0	0	0	0	0	0	0	0	0	0	0	0	0	0	0	0	0	0	0	0	0	0	0	0	0	0	0	0	0	0	0	0	0	0	0	0	0	0	0	0	0	0	0	0	0	0	0	0
hsa:5145	0	0	0	0	0	0	0	0	0	0	0	0	0	0	0	0	0	0	0	0	0	0	0	0	0	0	0	0	0	0	0	0	0	0	0	0	0	0	0	0	0	0	0	0	0	0	0	0	0
hsa:5146	0	0	0	0	0	0	0	0	0	0	0	0	0	0	0	0	0	0	0	0	0	0	0	0	0	0	0	0	0	0	0	0	0	0	0	0	0	0	0	0	0	0	0	0	0	0	0	0	0
hsa:5147	0	0	0	0	0	0	0	0	0	0	0	0	0	0	0	0	0	0	0	0	0	0	0	0	0	0	0	0	0	0	0	0	0	0	0	0	0	0	0	0	0	0	0	0	0	0	0	0	0
hsa:5148	0	0	0	0	0	0	0	0	0	0	0	0	0	0	0	0	0	0	0	0	0	0	0	0	0	0	0	0	0	0	0	0	0	0	0	0	0	0	0	0	0	0	0	0	0	0	0	0	0
hsa:5149	0	0	0	0	0	0	0	0	0	0	0	0	0	0	0	0	0	0	0	0	0	0	0	0	0	0	0	0	0	0	0	0	0	0	0	0	0	0	0	0	0	0	0	0	0	0	0	0	0
hsa:5150	0	0	0	0	0	0	0	0	0	0	0	0	0	0	0	0	0	0	0	0	0	0	0	0	0	0	0	0	0	0	0	0	0	0	0	0	0	0	0	0	0	0	0	0	0	0	0	0	0
hsa:5151	0	0	0	0	0	0	0	0	0	0	0	0	0	0	0	0	0	0	0	0	0	0	0	0	0	0	0	0	0	0	0	0	0	0	0	0	0	0	0	0	0	0	0	0	0	0	0	0	0
hsa:5152	0	0	0	0	0	0	0	0	0	0	0	0	0	0	0	0	0	0	0	0	0	0	0	0	0	0	0	0	0	0	0	0	0	0	0	0	0	0	0	0	0	0	0	0	0	0	0	0	0
hsa:5156	0	0	0	0	0	0	0	0	0	0	0	0	0	0	0	0	0	0	0	0	0	0	0	0	0	0	0	0	0	0	0	0	0	0	0	0	0	0	0	0	0	0	0	0	0	0	0	0	0
hsa:5158	0	0	0	0	0	0	0	0	0	0	0	0	0	0	0	0	0	0	0	0	0	0	0	0	0	0	0	0	0	0	0	0	0	0	0	0	0	0	0	0	0	0	0	0	0	0	0	0	0
hsa:5159	0	0	0	0	0	0	0	0	0	0	0	0	0	0	0	0	0	0	0	0	0	0	0	0	0	0	0	0	0	0	0	0	0	0	0	0	0	0	0	0	0	0	0	0	0	0	0	0	0
hsa:51601	0	0	0	0	0	0	0	0	0	0	0	0	0	0	0	0	0	0	0	0	0	0	0	0	1	0	0	0	0	0	0	0	0	0	0	0	0	0	0	0	0	0	0	0	0	0	0	0	0
hsa:51645	0	0	0	0	0	0	0	0	0	0	0	0	0	0	0	0	0	0	0	0	0	0	0	0	0	0	0	0	1	0	0	0	0	0	0	0	0	0	0	0	0	0	0	0	0	0	0	0	0
hsa:5167	0	0	0	0	0	0	0	0	0	0	0	0	0	0	0	1	0	0	0	0	0	0	0	0	0	0	0	0	0	0	0	0	0	0	0	0	0	0	0	0	0	0	0	0	0	0	0	0	0
hsa:5168	0	0	0	0	0	0	0	0	0	0	0	0	0	0	0	0	0	0	0	0	0	0	0	0	0	0	0	0	0	0	0	0	0	0	0	0	0	0	0	0	0	0	0	0	0	0	0	0	0
hsa:5169	0	0	0	0	0	0	0	0	0	0	0	0	0	0	0	0	0	0	0	0	0	0	0	0	0	0	0	0	0	0	0	0	0	0	0	0	0	0	0	0	0	0	0	0	0	0	0	0	0
hsa:51727	0	0	0	0	0	0	0	0	0	0	0	0	0	0	0	0	0	0	0	0	0	0	0	0	0	0	0	0	0	0	0	0	0	0	0	0	0	0	0	0	0	0	0	0	0	0	0	0	0
hsa:52	0	0	0	0	0	0	0	0	0	0	0	0	0	0	0	0	0	0	0	0	0	0	0	0	0	0	0	1	0	0	0	0	0	0	0	0	0	0	0	0	0	0	0	0	0	0	0	0	0
hsa:5294	0	0	0	0	0	0	0	0	0	0	0	0	0	0	0	0	0	0	0	0	0	0	0	0	0	0	0	0	0	0	0	0	0	0	0	0	0	0	0	0	0	0	0	0	0	0	0	0	0
hsa:53	0	0	0	0	0	0	0	0	0	0	0	0	0	0	0	0	0	0	0	0	0	0	0	0	0	0	0	1	0	0	0	0	0	0	0	0	0	0	0	0	0	0	0	0	0	0	0	0	0
hsa:5319	0	0	0	0	0	0	0	0	0	0	0	0	0	0	0	0	0	0	0	0	0	0	0	0	0	0	0	0	0	0	0	0	0	0	0	0	0	0	0	0	0	0	0	0	0	0	0	0	0
hsa:5320	0	0	0	0	0	0	0	0	0	0	0	0	0	0	0	0	0	0	0	0	0	0	0	0	0	0	0	0	0	0	0	0	0	0	0	0	0	0	0	0	0	0	0	0	0	0	0	0	0
hsa:5321	0	0	0	0	0	0	0	0	0	0	0	0	0	0	0	0	0	0	0	0	0	0	0	0	0	0	0	0	0	0	0	0	0	0	0	0	0	0	0	0	0	0	0	0	0	0	0	0	0
hsa:5322	0	0	0	0	0	0	0	0	0	0	0	0	0	0	0	0	0	0	0	0	0	0	0	0	0	0	0	0	0	0	0	0	0	0	0	0	0	0	0	0	0	0	0	0	0	0	0	0	0
hsa:5327	0	0	0	0	0	0	0	0	0	0	0	0	0	0	0	1	0	0	0	0	0	0	0	0	0	0	0	0	0	0	0	0	0	0	0	0	0	0	0	0	0	0	0	0	0	0	0	0	0
hsa:5328	0	0	0	0	0	0	0	0	0	0	0	0	0	0	0	1	0	0	0	0	0	0	0	0	0	0	0	0	0	0	0	0	0	0	0	0	0	0	0	0	0	0	0	0	0	0	0	0	0
hsa:5330	0	0	0	0	0	0	0	0	0	0	0	0	0	0	0	0	0	0	0	0	0	0	0	0	0	0	0	0	0	0	0	0	0	0	0	0	0	0	0	0	0	0	0	0	0	0	0	0	0
hsa:5331	0	0	0	0	0	0	0	0	0	0	0	0	0	0	0	0	0	0	0	0	0	0	0	0	0	0	0	0	0	0	0	0	0	0	0	0	0	0	0	0	0	0	0	0	0	0	0	0	0
hsa:5332	0	0	0	0	0	0	0	0	0	0	0	0	0	0	0	0	0	0	0	0	0	0	0	0	0	0	0	0	0	0	0	0	0	0	0	0	0	0	0	0	0	0	0	0	0	0	0	0	0
hsa:5333	0	0	0	0	0	0	0	0	0	0	0	0	0	0	0	0	0	0	0	0	0	0	0	0	0	0	0	0	0	0	0	0	0	0	0	0	0	0	0	0	0	0	0	0	0	0	0	0	0
hsa:5335	0	0	0	0	0	0	0	0	0	0	0	0	0	0	0	0	0	0	0	0	0	0	0	0	0	0	0	0	0	0	0	0	0	0	0	0	0	0	0	0	0	0	0	0	0	0	0	0	0
hsa:5336	0	0	0	0	0	0	0	0	0	0	0	0	0	0	0	0	0	0	0	0	0	0	0	0	0	0	0	0	0	0	0	0	0	0	0	0	0	0	0	0	0	0	0	0	0	0	0	0	0
hsa:5337	0	0	0	0	0	0	0	0	0	0	0	0	0	0	0	0	0	0	0	0	0	0	0	0	0	0	0	0	0	0	0	0	0	0	0	0	0	0	0	0	0	0	0	0	0	0	0	0	0
hsa:5338	0	0	0	0	0	0	0	0	0	0	0	0	0	0	0	0	0	0	0	0	0	0	0	0	0	0	0	0	0	0	0	0	0	0	0	0	0	0	0	0	0	0	0	0	0	0	0	0	0
hsa:5340	0	0	0	0	0	0	0	0	0	0	0	0	0	0	0	1	0	0	0	0	0	0	0	0	0	0	0	0	0	0	0	0	0	0	0	0	0	0	0	0	0	0	0	0	0	0	0	0	0
hsa:5351	0	0	0	0	1	0	0	0	0	0	0	0	0	0	0	0	0	0	0	0	0	0	0	0	0	0	0	0	0	0	0	0	0	0	0	0	0	0	0	0	0	0	0	0	0	0	0	0	0
hsa:53938	0	0	0	0	0	0	0	0	0	0	0	0	0	0	0	0	0	0	0	0	0	0	0	0	0	0	0	0	1	0	0	0	0	0	0	0	0	0	0	0	0	0	0	0	0	0	0	0	0
hsa:54	0	0	0	0	0	0	0	0	0	0	0	0	0	0	0	0	0	0	0	0	0	0	0	0	0	0	0	1	0	0	0	0	0	0	0	0	0	0	0	0	0	0	0	0	0	0	0	0	0
hsa:5406	0	0	0	0	0	0	0	0	0	0	0	0	0	0	0	0	0	0	0	0	0	0	0	0	0	0	0	0	0	0	0	0	0	0	0	0	0	0	0	0	0	0	0	0	0	0	0	0	0
hsa:5407	0	0	0	0	0	0	0	0	0	0	0	0	0	0	0	0	0	0	0	0	0	0	0	0	0	0	0	0	0	0	0	0	0	0	0	0	0	0	0	0	0	0	0	0	0	0	0	0	0
hsa:5408	0	0	0	0	0	0	0	0	0	0	0	0	0	0	0	0	0	0	0	0	0	0	0	0	0	0	0	0	0	0	0	0	0	0	0	0	0	0	0	0	0	0	0	0	0	0	0	0	0
hsa:5422	0	0	0	0	0	0	0	0	0	0	0	0	0	0	0	0	0	0	0	0	0	0	0	0	0	0	0	0	0	0	0	0	0	0	0	0	0	0	0	0	0	0	0	0	0	0	0	0	0
hsa:5423	0	0	0	0	0	0	0	0	0	0	0	0	0	0	0	0	0	0	0	0	0	0	0	0	0	0	0	0	0	0	0	0	0	0	0	0	0	0	0	0	0	0	0	0	0	0	0	0	0
hsa:5444	0	0	0	0	0	0	0	0	0	0	0	0	0	0	0	1	0	0	0	0	0	0	0	0	0	0	0	0	0	0	0	0	0	0	0	0	0	0	0	0	0	0	0	0	0	0	0	0	0
hsa:5445	0	0	0	0	0	0	0	0	0	0	0	0	0	0	0	1	0	0	0	0	0	0	0	0	0	0	0	0	0	0	0	0	0	0	0	0	0	0	0	0	0	0	0	0	0	0	0	0	0
hsa:5447	0	0	0	0	0	0	0	0	0	0	0	0	0	0	0	0	0	0	0	0	0	0	0	0	0	0	0	0	0	0	0	0	0	0	0	0	0	0	0	0	0	0	0	0	0	0	0	0	0
hsa:54490	0	0	0	0	0	0	0	0	0	0	0	0	0	0	0	0	0	0	0	0	0	0	0	0	0	0	0	0	0	0	0	0	0	0	0	0	0	0	0	0	0	0	0	0	0	0	0	0	0
hsa:54575	0	0	0	0	0	0	0	0	0	0	0	0	0	0	0	0	0	0	0	0	0	0	0	0	0	0	0	0	0	0	0	0	0	0	0	0	0	0	0	0	0	0	0	0	0	0	0	0	0
hsa:54576	0	0	0	0	0	0	0	0	0	0	0	0	0	0	0	0	0	0	0	0	0	0	0	0	0	0	0	0	0	0	0	0	0	0	0	0	0	0	0	0	0	0	0	0	0	0	0	0	0
hsa:54577	0	0	0	0	0	0	0	0	0	0	0	0	0	0	0	0	0	0	0	0	0	0	0	0	0	0	0	0	0	0	0	0	0	0	0	0	0	0	0	0	0	0	0	0	0	0	0	0	0
hsa:54578	0	0	0	0	0	0	0	0	0	0	0	0	0	0	0	0	0	0	0	0	0	0	0	0	0	0	0	0	0	0	0	0	0	0	0	0	0	0	0	0	0	0	0	0	0	0	0	0	0
hsa:54579	0	0	0	0	0	0	0	0	0	0	0	0	0	0	0	0	0	0	0	0	0	0	0	0	0	0	0	0	0	0	0	0	0	0	0	0	0	0	0	0	0	0	0	0	0	0	0	0	0
hsa:54600	0	0	0	0	0	0	0	0	0	0	0	0	0	0	0	0	0	0	0	0	0	0	0	0	0	0	0	0	0	0	0	0	0	0	0	0	0	0	0	0	0	0	0	0	0	0	0	0	0
hsa:54657	0	0	0	0	0	0	0	0	0	0	0	0	0	0	0	0	0	0	0	0	0	0	0	0	0	0	0	0	0	0	0	0	0	0	0	0	0	0	0	0	0	0	0	0	0	0	0	0	0
hsa:54658	0	0	0	0	0	0	0	0	0	0	0	0	0	0	0	0	0	0	0	0	0	0	0	0	0	0	0	0	0	0	0	0	0	0	0	0	0	0	0	0	0	0	0	0	0	0	0	0	0
hsa:54659	0	0	0	0	0	0	0	0	0	0	0	0	0	0	0	0	0	0	0	0	0	0	0	0	0	0	0	0	0	0	0	0	0	0	0	0	0	0	0	0	0	0	0	0	0	0	0	0	0
hsa:54677	0	0	0	0	0	0	0	0	0	0	0	0	0	0	0	0	0	0	0	0	0	0	0	0	0	0	0	0	0	0	0	0	0	0	0	0	0	0	0	0	0	0	0	0	0	0	0	0	0
hsa:5470	0	0	0	0	0	0	0	0	0	0	0	0	0	0	0	0	0	0	0	0	0	0	0	0	0	0	0	0	1	0	0	0	0	0	0	0	0	0	0	0	0	0	0	0	0	0	0	0	0
hsa:5475	0	0	0	0	0	0	0	0	0	0	0	0	0	0	0	0	0	0	0	0	0	0	0	0	0	0	0	0	1	0	0	0	0	0	0	0	0	0	0	0	0	0	0	0	0	0	0	0	0
hsa:5476	0	0	0	0	0	0	0	0	0	0	0	0	0	0	0	1	0	0	0	0	0	0	0	0	0	0	0	0	0	0	0	0	0	0	0	0	0	0	0	0	0	0	0	0	0	0	0	0	0
hsa:5478	0	0	0	0	0	0	0	0	0	0	0	0	0	0	0	0	0	0	0	0	0	0	0	0	0	0	0	0	1	0	0	0	0	0	0	0	0	0	0	0	0	0	0	0	0	0	0	0	0
hsa:5479	0	0	0	0	0	0	0	0	0	0	0	0	0	0	0	0	0	0	0	0	0	0	0	0	0	0	0	0	1	0	0	0	0	0	0	0	0	0	0	0	0	0	0	0	0	0	0	0	0
hsa:5481	0	0	0	0	0	0	0	0	0	0	0	0	0	0	0	0	0	0	0	0	0	0	0	0	0	0	0	0	1	0	0	0	0	0	0	0	0	0	0	0	0	0	0	0	0	0	0	0	0
hsa:54878	0	0	0	0	0	0	0	0	0	0	0	0	0	0	0	1	0	0	0	0	0	0	0	0	0	0	0	0	0	0	0	0	0	0	0	0	0	0	0	0	0	0	0	0	0	0	0	0	0
hsa:5494	0	0	0	0	0	0	0	0	0	0	0	0	0	0	0	0	0	0	0	0	0	0	0	0	0	0	0	0	1	0	0	0	0	0	0	0	0	0	0	0	0	0	0	0	0	0	0	0	0
hsa:5495	0	0	0	0	0	0	0	0	0	0	0	0	0	0	0	0	0	0	0	0	0	0	0	0	0	0	0	0	1	0	0	0	0	0	0	0	0	0	0	0	0	0	0	0	0	0	0	0	0
hsa:5496	0	0	0	0	0	0	0	0	0	0	0	0	0	0	0	0	0	0	0	0	0	0	0	0	0	0	0	0	1	0	0	0	0	0	0	0	0	0	0	0	0	0	0	0	0	0	0	0	0
hsa:5499	0	0	0	0	0	0	0	0	0	0	0	0	0	0	0	0	0	0	0	0	0	0	0	0	0	0	0	0	1	0	0	0	0	0	0	0	0	0	0	0	0	0	0	0	0	0	0	0	0
hsa:55	0	0	0	0	0	0	0	0	0	0	0	0	0	0	0	0	0	0	0	0	0	0	0	0	0	0	0	1	0	0	0	0	0	0	0	0	0	0	0	0	0	0	0	0	0	0	0	0	0
hsa:5500	0	0	0	0	0	0	0	0	0	0	0	0	0	0	0	0	0	0	0	0	0	0	0	0	0	0	0	0	1	0	0	0	0	0	0	0	0	0	0	0	0	0	0	0	0	0	0	0	0
hsa:5501	0	0	0	0	0	0	0	0	0	0	0	0	0	0	0	0	0	0	0	0	0	0	0	0	0	0	0	0	1	0	0	0	0	0	0	0	0	0	0	0	0	0	0	0	0	0	0	0	0
hsa:5515	0	0	0	0	0	0	0	0	0	0	0	0	0	0	0	0	0	0	0	0	0	0	0	0	0	0	0	0	1	0	0	0	0	0	0	0	0	0	0	0	0	0	0	0	0	0	0	0	0
hsa:5516	0	0	0	0	0	0	0	0	0	0	0	0	0	0	0	0	0	0	0	0	0	0	0	0	0	0	0	0	1	0	0	0	0	0	0	0	0	0	0	0	0	0	0	0	0	0	0	0	0
hsa:5523	0	0	0	0	0	0	0	0	0	0	0	0	0	0	0	0	0	0	0	0	0	0	0	0	0	0	0	0	1	0	0	0	0	0	0	0	0	0	0	0	0	0	0	0	0	0	0	0	0
hsa:5530	0	0	0	0	0	0	0	0	0	0	0	0	0	0	0	0	0	0	0	0	0	0	0	0	0	0	0	0	1	0	0	0	0	0	0	0	0	0	0	0	0	0	0	0	0	0	0	0	0
hsa:5531	0	0	0	0	0	0	0	0	0	0	0	0	0	0	0	0	0	0	0	0	0	0	0	0	0	0	0	0	1	0	0	0	0	0	0	0	0	0	0	0	0	0	0	0	0	0	0	0	0
hsa:55312	0	0	0	0	0	0	0	0	0	0	0	0	0	0	0	0	0	0	1	0	0	0	0	0	0	0	0	0	0	0	0	0	0	0	0	0	0	0	0	0	0	0	0	0	0	0	0	0	0
hsa:5532	0	0	0	0	0	0	0	0	0	0	0	0	0	0	0	0	0	0	0	0	0	0	0	0	0	0	0	0	1	0	0	0	0	0	0	0	0	0	0	0	0	0	0	0	0	0	0	0	0
hsa:5533	0	0	0	0	0	0	0	0	0	0	0	0	0	0	0	0	0	0	0	0	0	0	0	0	0	0	0	0	1	0	0	0	0	0	0	0	0	0	0	0	0	0	0	0	0	0	0	0	0
hsa:55359	0	0	0	0	0	0	0	0	0	0	0	0	0	0	0	0	0	0	0	0	0	0	0	0	0	0	0	0	0	0	0	0	0	0	0	0	0	0	0	0	0	0	0	0	0	0	0	0	0
hsa:5536	0	0	0	0	0	0	0	0	0	0	0	0	0	0	0	0	0	0	0	0	0	0	0	0	0	0	0	0	1	0	0	0	0	0	0	0	0	0	0	0	0	0	0	0	0	0	0	0	0
hsa:5537	0	0	0	0	0	0	0	0	0	0	0	0	0	0	0	0	0	0	0	0	0	0	0	0	0	0	0	0	1	0	0	0	0	0	0	0	0	0	0	0	0	0	0	0	0	0	0	0	0
hsa:5538	0	0	0	0	0	0	0	0	0	0	0	0	0	0	0	0	0	0	0	0	0	0	0	0	0	0	0	0	0	0	0	0	0	0	0	0	0	0	0	0	0	0	0	0	0	0	0	0	0
hsa:5547	0	0	0	0	0	0	0	0	0	0	0	0	0	0	0	1	0	0	0	0	0	0	0	0	0	0	0	0	0	0	0	0	0	0	0	0	0	0	0	0	0	0	0	0	0	0	0	0	0
hsa:5550	0	0	0	0	0	0	0	0	0	0	0	0	0	0	0	1	0	0	0	0	0	0	0	0	0	0	0	0	0	0	0	0	0	0	0	0	0	0	0	0	0	0	0	0	0	0	0	0	0
hsa:55512	0	0	0	0	0	0	0	0	0	0	0	0	0	0	0	0	0	0	0	0	0	0	0	0	0	0	0	0	0	0	0	0	0	0	0	0	0	0	0	0	0	0	0	0	0	0	0	0	0
hsa:5562	0	0	0	0	0	0	0	0	0	0	0	0	0	0	0	0	0	0	0	0	0	0	0	0	0	0	0	0	0	0	0	0	0	0	0	0	0	0	0	0	0	0	0	0	0	0	0	0	0
hsa:55775	0	0	0	0	0	0	0	0	0	0	0	0	0	0	0	0	0	0	0	0	0	0	0	0	0	0	0	0	0	0	0	0	0	0	0	0	0	0	0	0	0	0	0	0	0	0	0	0	0
hsa:558	0	0	0	0	0	0	0	0	0	0	0	0	0	0	0	0	0	0	0	0	0	0	0	0	0	0	0	0	0	0	0	0	0	0	0	0	0	0	0	0	0	0	0	0	0	0	0	0	0
hsa:55811	1	0	0	0	0	0	0	0	0	0	0	0	0	0	0	0	0	0	0	0	0	0	0	0	0	0	0	0	0	0	0	0	0	0	0	0	0	0	0	0	0	0	0	0	0	0	0	0	0
hsa:55902	0	0	0	0	0	0	0	0	0	0	0	0	0	0	0	0	0	0	0	0	0	0	0	0	0	0	0	0	0	0	0	0	0	0	0	0	0	0	0	0	0	0	0	0	0	0	0	0	0
hsa:5594	0	0	0	0	0	0	0	0	0	0	0	0	0	0	0	0	0	0	0	0	0	0	0	0	0	0	0	0	0	0	0	0	0	0	0	0	0	0	0	0	0	0	0	0	0	0	0	0	0
hsa:5595	0	0	0	0	0	0	0	0	0	0	0	0	0	0	0	0	0	0	0	0	0	0	0	0	0	0	0	0	0	0	0	0	0	0	0	0	0	0	0	0	0	0	0	0	0	0	0	0	0
hsa:5596	0	0	0	0	0	0	0	0	0	0	0	0	0	0	0	0	0	0	0	0	0	0	0	0	0	0	0	0	0	0	0	0	0	0	0	0	0	0	0	0	0	0	0	0	0	0	0	0	0
hsa:5597	0	0	0	0	0	0	0	0	0	0	0	0	0	0	0	0	0	0	0	0	0	0	0	0	0	0	0	0	0	0	0	0	0	0	0	0	0	0	0	0	0	0	0	0	0	0	0	0	0
hsa:5598	0	0	0	0	0	0	0	0	0	0	0	0	0	0	0	0	0	0	0	0	0	0	0	0	0	0	0	0	0	0	0	0	0	0	0	0	0	0	0	0	0	0	0	0	0	0	0	0	0
hsa:5599	0	0	0	0	0	0	0	0	0	0	0	0	0	0	0	0	0	0	0	0	0	0	0	0	0	0	0	0	0	0	0	0	0	0	0	0	0	0	0	0	0	0	0	0	0	0	0	0	0
hsa:5600	0	0	0	0	0	0	0	0	0	0	0	0	0	0	0	0	0	0	0	0	0	0	0	0	0	0	0	0	0	0	0	0	0	0	0	0	0	0	0	0	0	0	0	0	0	0	0	0	0
hsa:5601	0	0	0	0	0	0	0	0	0	0	0	0	0	0	0	0	0	0	0	0	0	0	0	0	0	0	0	0	0	0	0	0	0	0	0	0	0	0	0	0	0	0	0	0	0	0	0	0	0
hsa:5602	0	0	0	0	0	0	0	0	0	0	0	0	0	0	0	0	0	0	0	0	0	0	0	0	0	0	0	0	0	0	0	0	0	0	0	0	0	0	0	0	0	0	0	0	0	0	0	0	0
hsa:5603	0	0	0	0	0	0	0	0	0	0	0	0	0	0	0	0	0	0	0	0	0	0	0	0	0	0	0	0	0	0	0	0	0	0	0	0	0	0	0	0	0	0	0	0	0	0	0	0	0
hsa:5604	0	0	0	0	0	0	0	0	0	0	0	0	0	0	0	0	0	0	0	0	0	0	0	0	0	0	0	0	0	0	0	0	0	0	0	0	0	0	0	0	0	0	0	0	0	0	0	0	0
hsa:5605	0	0	0	0	0	0	0	0	0	0	0	0	0	0	0	0	0	0	0	0	0	0	0	0	0	0	0	0	0	0	0	0	0	0	0	0	0	0	0	0	0	0	0	0	0	0	0	0	0
hsa:5606	0	0	0	0	0	0	0	0	0	0	0	0	0	0	0	0	0	0	0	0	0	0	0	0	0	0	0	0	0	0	0	0	0	0	0	0	0	0	0	0	0	0	0	0	0	0	0	0	0
hsa:5607	0	0	0	0	0	0	0	0	0	0	0	0	0	0	0	0	0	0	0	0	0	0	0	0	0	0	0	0	0	0	0	0	0	0	0	0	0	0	0	0	0	0	0	0	0	0	0	0	0
hsa:5608	0	0	0	0	0	0	0	0	0	0	0	0	0	0	0	0	0	0	0	0	0	0	0	0	0	0	0	0	0	0	0	0	0	0	0	0	0	0	0	0	0	0	0	0	0	0	0	0	0
hsa:5624	0	0	0	0	0	0	0	0	0	0	0	0	0	0	0	0	0	0	0	0	0	0	0	0	0	0	0	0	0	0	0	0	0	0	0	0	0	0	0	0	0	0	0	0	0	0	0	0	0
hsa:5625	0	0	0	0	0	0	0	0	0	1	0	0	0	0	0	0	0	0	0	0	0	0	0	0	0	0	0	0	0	0	0	0	0	0	0	0	0	0	0	0	0	0	0	0	0	0	0	0	0
hsa:5645	0	0	0	0	0	0	0	0	0	0	0	0	0	0	0	1	0	0	0	0	0	0	0	0	0	0	0	0	0	0	0	0	0	0	0	0	0	0	0	0	0	0	0	0	0	0	0	0	0
hsa:5646	0	0	0	0	0	0	0	0	0	0	0	0	0	0	0	1	0	0	0	0	0	0	0	0	0	0	0	0	0	0	0	0	0	0	0	0	0	0	0	0	0	0	0	0	0	0	0	0	0
hsa:5650	0	0	0	0	0	0	0	0	0	0	0	0	0	0	0	1	0	0	0	0	0	0	0	0	0	0	0	0	0	0	0	0	0	0	0	0	0	0	0	0	0	0	0	0	0	0	0	0	0
hsa:5651	0	0	0	0	0	0	0	0	0	0	0	0	0	0	0	1	0	0	0	0	0	0	0	0	0	0	0	0	0	0	0	0	0	0	0	0	0	0	0	0	0	0	0	0	0	0	0	0	0
hsa:5657	0	0	0	0	0	0	0	0	0	0	0	0	0	0	0	1	0	0	0	0	0	0	0	0	0	0	0	0	0	0	0	0	0	0	0	0	0	0	0	0	0	0	0	0	0	0	0	0	0
hsa:56922	0	0	0	0	0	0	0	1	0	0	0	0	0	0	0	0	0	0	0	0	0	0	0	0	0	0	0	0	0	0	0	0	0	0	0	0	0	0	0	0	0	0	0	0	0	0	0	0	0
hsa:57016	0	0	0	0	0	0	0	0	0	0	0	0	0	0	0	0	0	0	0	0	0	0	0	0	0	0	0	0	0	0	0	0	0	0	0	0	0	0	0	1	0	0	0	0	0	0	0	0	0
hsa:57176	0	0	0	0	0	0	0	0	0	0	0	0	0	1	0	0	0	0	0	0	0	0	0	0	0	0	0	0	0	0	0	0	0	0	0	0	0	0	0	0	0	0	0	0	0	0	0	0	0
hsa:5740	0	0	0	0	0	0	0	0	0	0	0	0	0	0	0	0	0	0	0	0	0	0	0	0	0	0	0	0	0	0	0	0	0	0	0	0	0	0	0	0	1	0	0	0	0	0	0	0	0
hsa:5742	0	0	0	0	0	0	0	0	0	0	0	0	0	0	0	0	0	0	0	0	0	0	0	0	0	0	1	0	0	1	1	1	0	1	1	0	1	0	1	0	0	1	0	0	0	1	0	0	1
hsa:5743	0	0	0	0	0	0	0	0	0	0	0	0	0	0	0	0	0	0	0	0	0	0	0	0	0	0	0	0	0	1	1	1	0	1	1	0	1	0	1	0	0	1	0	0	0	1	0	0	1
hsa:5747	0	0	0	0	0	0	0	0	0	0	0	0	0	0	0	0	0	0	0	0	0	0	0	0	0	0	0	0	0	0	0	0	0	0	0	0	0	0	0	0	0	0	0	0	0	0	0	0	0
hsa:5754	0	0	0	0	0	0	0	0	0	0	0	0	0	0	0	0	0	0	0	0	0	0	0	0	0	0	0	0	0	0	0	0	0	0	0	0	0	0	0	0	0	0	0	0	0	0	0	0	0
hsa:57665	0	0	0	0	0	0	0	0	0	0	0	0	0	0	0	0	0	0	0	0	0	0	0	0	0	0	0	0	0	0	0	0	0	0	0	0	0	0	0	0	0	0	0	0	0	0	0	0	0
hsa:58190	0	0	0	0	0	0	0	0	0	0	0	0	0	0	0	0	0	0	0	0	0	0	0	0	0	0	0	0	1	0	0	0	0	0	0	0	0	0	0	0	0	0	0	0	0	0	0	0	0
hsa:5831	0	0	0	0	0	0	0	0	0	1	0	0	0	0	0	0	0	0	0	0	0	0	0	0	0	0	0	0	0	0	0	0	0	0	0	0	0	0	0	0	0	0	0	0	0	0	0	0	0
hsa:5834	0	0	0	0	0	0	0	0	0	0	0	0	0	0	0	0	0	0	0	0	0	0	0	0	0	0	0	0	0	0	0	0	0	0	0	0	0	0	0	0	0	0	0	0	0	0	0	0	0
hsa:5836	0	0	0	0	0	0	0	0	0	0	0	0	0	0	0	0	0	0	0	0	0	0	0	0	0	0	0	0	0	0	0	0	0	0	0	0	0	0	0	0	0	0	0	0	0	0	0	0	0
hsa:5837	0	0	0	0	0	0	0	0	0	0	0	0	0	0	0	0	0	0	0	0	0	0	0	0	0	0	0	0	0	0	0	0	0	0	0	0	0	0	0	0	0	0	0	0	0	0	0	0	0
hsa:586	0	0	0	0	0	0	0	0	0	0	0	0	0	1	0	0	0	0	0	0	0	0	1	0	0	0	0	0	0	0	0	0	0	0	0	0	0	0	0	0	0	0	0	0	0	0	0	0	0
hsa:5860	1	0	0	0	0	0	0	0	0	0	0	0	0	0	0	0	0	0	0	0	0	0	0	0	0	0	0	0	0	0	0	0	0	0	0	0	0	0	0	0	0	0	0	0	0	0	0	0	0
hsa:587	0	0	0	0	0	0	0	0	0	0	0	0	0	0	0	0	0	0	0	0	0	0	1	0	0	0	0	0	0	0	0	0	0	0	0	0	0	0	0	0	0	0	0	0	0	0	0	0	0
hsa:590	0	0	0	0	0	0	0	0	0	0	0	0	0	0	0	1	0	0	0	0	0	0	0	0	0	0	0	0	0	0	0	0	0	0	0	0	0	0	0	0	0	0	0	0	0	0	0	0	0
hsa:5972	0	0	0	0	0	0	0	0	0	0	0	0	0	0	0	0	0	0	0	0	0	0	0	0	0	0	0	0	0	0	0	0	0	0	0	0	0	0	0	0	0	0	0	0	0	0	0	0	0
hsa:5979	0	0	0	0	0	0	0	0	0	0	0	0	0	0	0	0	0	0	0	0	0	0	0	0	0	0	0	0	0	0	0	0	0	0	0	0	0	0	0	0	0	0	0	0	0	0	0	0	0
hsa:6098	0	0	0	0	0	0	0	0	0	0	0	0	0	0	0	0	0	0	0	0	0	0	0	0	0	0	0	0	0	0	0	0	0	0	0	0	0	0	0	0	0	0	0	0	0	0	0	0	0
hsa:613	0	0	0	0	0	0	0	0	0	0	0	0	0	0	0	0	0	0	0	0	0	0	0	0	0	0	0	0	0	0	0	0	0	0	0	0	0	0	0	0	0	0	0	0	0	0	0	0	0
hsa:6240	0	0	0	0	0	0	0	0	0	0	0	0	0	0	0	0	0	0	0	0	0	0	0	0	0	0	0	0	0	0	0	0	0	0	0	0	0	0	0	0	0	0	0	0	0	0	0	0	0
hsa:6241	0	0	0	0	0	0	0	0	0	0	0	0	0	0	0	0	0	0	0	0	0	0	0	0	0	0	0	0	0	0	0	0	0	0	0	0	0	0	0	0	0	0	0	0	0	0	0	0	0
hsa:6259	0	0	0	0	0	0	0	0	0	0	0	0	0	0	0	0	0	0	0	0	0	0	0	0	0	0	0	0	0	0	0	0	0	0	0	0	0	0	0	0	0	0	0	0	0	0	0	0	0
hsa:6300	0	0	0	0	0	0	0	0	0	0	0	0	0	0	0	0	0	0	0	0	0	0	0	0	0	0	0	0	0	0	0	0	0	0	0	0	0	0	0	0	0	0	0	0	0	0	0	0	0
hsa:63036	0	0	0	0	0	0	0	0	0	0	0	0	0	0	0	1	0	0	0	0	0	0	0	0	0	0	0	0	0	0	0	0	0	0	0	0	0	0	0	0	0	0	0	0	0	0	0	0	0
hsa:635	0	0	0	0	0	0	0	0	0	0	0	1	0	0	0	0	0	0	0	0	0	0	0	0	0	0	0	0	0	0	0	0	0	0	0	0	0	0	0	0	0	0	0	0	0	0	0	0	0
hsa:63904	0	0	0	0	0	0	0	0	0	0	0	0	0	0	0	0	0	0	0	0	0	0	0	0	0	0	0	0	1	0	0	0	0	0	0	0	0	0	0	0	0	0	0	0	0	0	0	0	0
hsa:64087	0	0	0	0	0	0	0	1	0	0	0	0	0	0	0	0	0	0	0	0	0	0	0	0	0	0	0	0	0	0	0	0	0	0	0	0	0	0	0	0	0	0	0	0	0	0	0	0	0
hsa:6416	0	0	0	0	0	0	0	0	0	0	0	0	0	0	0	0	0	0	0	0	0	0	0	0	0	0	0	0	0	0	0	0	0	0	0	0	0	0	0	0	0	0	0	0	0	0	0	0	0
hsa:64499	0	0	0	0	0	0	0	0	0	0	0	0	0	0	0	1	0	0	0	0	0	0	0	0	0	0	0	0	0	0	0	0	0	0	0	0	0	0	0	0	0	0	0	0	0	0	0	0	0
hsa:645	0	0	0	0	0	0	0	0	0	0	0	0	0	0	0	0	0	0	1	0	0	0	0	0	0	0	0	0	0	0	0	0	0	0	0	0	0	0	0	0	0	0	0	0	0	0	0	0	0
hsa:64600	0	0	0	0	0	0	0	0	0	0	0	0	0	0	0	0	0	0	0	0	0	0	0	0	0	0	0	0	0	0	0	0	0	0	0	0	0	0	0	0	0	0	0	0	0	0	0	0	0
hsa:64802	1	0	0	0	0	0	0	0	0	0	0	0	0	0	0	0	0	0	0	0	0	0	0	0	0	0	0	0	0	0	0	0	0	0	0	0	0	0	0	0	0	0	0	0	0	0	0	0	0
hsa:64816	0	0	0	0	0	0	0	0	0	0	0	0	0	0	0	0	0	0	0	0	0	0	0	0	0	0	0	0	0	0	0	0	0	0	0	0	0	0	0	0	1	0	0	0	0	0	0	0	0
hsa:64850	0	0	0	0	0	0	0	0	0	0	0	0	0	0	0	0	0	0	0	0	0	0	0	0	0	0	0	0	0	0	0	0	0	0	0	0	0	0	0	0	0	0	0	0	0	0	0	0	0
hsa:64902	0	0	0	0	0	0	0	0	0	0	0	0	0	0	0	0	0	0	0	0	0	0	0	0	0	0	0	0	0	0	0	0	0	0	0	0	0	0	0	0	0	0	0	0	0	0	0	0	0
hsa:657	0	0	0	0	0	0	0	0	0	0	0	0	0	0	0	0	0	0	0	0	0	0	0	0	0	0	0	0	0	0	0	0	0	0	0	0	0	0	0	0	0	0	0	0	0	0	0	0	0
hsa:658	0	0	0	0	0	0	0	0	0	0	0	0	0	0	0	0	0	0	0	0	0	0	0	0	0	0	0	0	0	0	0	0	0	0	0	0	0	0	0	0	0	0	0	0	0	0	0	0	0
hsa:660	0	0	0	0	0	0	0	0	0	0	0	0	0	0	0	0	0	0	0	0	0	0	0	0	0	0	0	0	0	0	0	0	0	0	0	0	0	0	0	0	0	0	0	0	0	0	0	0	0
hsa:6609	0	0	0	0	0	0	0	0	0	0	0	0	0	0	0	0	0	0	0	0	0	0	0	0	0	0	0	0	0	0	0	0	0	0	0	0	0	0	0	0	0	0	0	0	0	0	0	0	0
hsa:6610	0	0	0	0	0	0	0	0	0	0	0	0	0	0	0	0	0	0	0	0	0	0	0	0	0	0	0	0	0	0	0	0	0	0	0	0	0	0	0	0	0	0	0	0	0	0	0	0	0
hsa:6646	0	0	0	0	0	0	0	0	0	0	0	0	0	0	0	0	0	0	0	0	0	0	0	0	0	0	0	0	0	0	0	0	0	0	0	0	0	0	0	0	0	0	0	0	0	0	0	0	0
hsa:6652	1	0	0	0	0	0	0	0	0	0	0	0	0	0	0	0	0	0	0	0	0	0	0	0	0	0	0	0	0	0	0	0	0	0	0	0	0	0	0	0	0	0	0	0	0	0	0	0	0
hsa:670	0	0	0	0	0	0	0	0	0	0	0	0	0	0	0	0	0	0	0	0	0	0	0	0	0	0	0	0	0	0	0	0	0	0	0	0	0	0	0	0	0	0	0	0	0	0	0	0	0
hsa:6713	0	0	0	0	0	0	0	0	0	0	0	0	0	0	0	0	0	0	0	0	0	0	0	0	0	0	0	0	0	0	0	0	0	0	0	0	0	0	0	0	0	0	0	0	0	0	0	0	0
hsa:6714	0	0	0	0	0	0	0	0	0	0	0	0	0	0	0	0	0	0	0	0	0	0	0	0	0	0	0	0	0	0	0	0	0	0	0	0	0	0	0	0	0	0	0	0	0	0	0	0	0
hsa:6716	0	0	0	0	0	0	0	0	0	0	0	0	0	0	0	0	0	0	0	0	0	0	0	0	0	0	0	0	0	0	0	0	0	0	0	0	0	0	0	0	0	0	0	0	0	0	0	0	0
hsa:6725	0	0	0	0	0	0	0	0	0	0	0	0	0	0	0	0	0	0	0	0	0	0	0	0	0	0	0	0	0	0	0	0	0	0	0	0	0	0	0	0	0	0	0	0	0	0	0	0	0
hsa:6768	0	0	0	0	0	0	0	0	0	0	0	0	0	0	0	1	0	0	0	0	0	0	0	0	0	0	0	0	0	0	0	0	0	0	0	0	0	0	0	0	0	0	0	0	0	0	0	0	0
hsa:6799	0	0	0	0	0	0	0	0	0	0	0	0	0	0	0	0	0	0	0	0	0	0	0	0	0	0	0	0	0	0	0	0	0	0	0	0	0	0	0	0	0	0	0	0	0	0	0	0	0
hsa:683	0	0	0	0	0	0	0	0	0	0	1	0	0	0	0	0	0	0	0	0	0	0	0	0	0	0	0	0	0	0	0	0	0	0	0	0	0	0	0	0	0	0	0	0	0	0	0	0	0
hsa:686	0	0	0	0	0	0	0	1	0	0	0	0	0	0	0	0	0	0	0	0	0	0	0	0	0	0	0	0	0	0	0	0	0	0	0	0	0	0	0	0	0	0	0	0	0	0	0	0	0
hsa:6897	0	0	0	0	0	0	0	0	0	0	0	0	0	0	1	0	0	0	0	0	0	0	0	0	0	0	0	0	0	0	0	0	0	0	0	0	0	0	0	0	0	0	0	0	0	0	0	0	0
hsa:6898	0	0	0	0	0	1	0	0	0	0	0	0	0	0	0	0	0	0	0	0	0	0	0	0	0	0	0	0	0	0	0	0	0	0	0	0	0	0	0	0	0	0	0	0	0	0	0	0	0
hsa:695	0	0	0	0	0	0	0	0	0	0	0	0	0	0	0	0	0	0	0	0	0	0	0	0	0	0	0	0	0	0	0	0	0	0	0	0	0	0	0	0	0	0	0	0	0	0	0	0	0
hsa:7006	0	0	0	0	0	0	0	0	0	0	0	0	0	0	0	0	0	0	0	0	0	0	0	0	0	0	0	0	0	0	0	0	0	0	0	0	0	0	0	0	0	0	0	0	0	0	0	0	0
hsa:7010	0	0	0	0	0	0	0	0	0	0	0	0	0	0	0	0	0	0	0	0	0	0	0	0	0	0	0	0	0	0	0	0	0	0	0	0	0	0	0	0	0	0	0	0	0	0	0	0	0
hsa:7015	0	0	0	0	0	0	0	0	0	0	0	0	0	0	0	0	0	0	0	0	0	0	0	0	0	0	0	0	0	0	0	0	0	0	0	0	0	0	0	0	0	0	0	0	0	0	0	0	0
hsa:7046	0	0	0	0	0	0	0	0	0	0	0	0	0	0	0	0	0	0	0	0	0	0	0	0	0	0	0	0	0	0	0	0	0	0	0	0	0	0	0	0	0	0	0	0	0	0	0	0	0
hsa:7054	0	0	0	0	0	1	0	0	0	0	0	0	0	0	0	0	0	0	0	0	0	0	0	0	0	0	0	0	0	0	0	0	0	0	0	0	0	0	0	0	0	0	0	0	0	0	0	0	0
hsa:7075	0	0	0	0	0	0	0	0	0	0	0	0	0	0	0	0	0	0	0	0	0	0	0	0	0	0	0	0	0	0	0	0	0	0	0	0	0	0	0	0	0	0	0	0	0	0	0	0	0
hsa:7083	0	0	0	0	0	0	0	0	0	0	0	0	0	0	0	0	0	0	0	0	0	0	0	0	0	0	0	0	0	0	0	0	0	0	0	0	0	0	0	0	0	0	0	0	0	0	0	0	0
hsa:7084	0	0	0	0	0	0	0	0	0	0	0	0	0	0	0	0	0	0	0	0	0	0	0	0	0	0	0	0	0	0	0	0	0	0	0	0	0	0	0	0	0	0	0	0	0	0	0	0	0
hsa:7150	0	0	0	0	0	0	0	0	0	0	0	0	0	0	0	0	0	0	0	0	0	0	0	0	0	0	0	0	0	0	0	0	0	0	0	0	0	0	0	0	0	0	0	0	0	0	0	0	0
hsa:7153	0	0	0	0	0	0	0	0	0	0	0	0	0	0	0	0	0	0	0	0	0	0	0	0	0	0	0	0	0	0	0	0	1	0	0	0	0	0	0	0	0	0	0	0	0	0	0	0	0
hsa:7155	0	0	0	0	0	0	0	0	0	0	0	0	0	0	0	0	0	0	0	0	0	0	0	0	0	0	0	0	0	0	0	0	1	0	0	0	0	0	0	0	0	0	0	0	0	0	0	0	0
hsa:7156	0	0	0	0	0	0	0	0	0	0	0	0	0	0	0	0	0	0	0	0	0	0	0	0	0	0	0	0	0	0	0	0	0	0	0	0	0	0	0	0	0	0	0	0	0	0	0	0	0
hsa:7172	0	0	0	0	0	0	0	0	0	0	0	0	0	0	0	0	0	0	0	0	0	0	0	0	0	0	0	0	0	0	0	0	0	0	0	0	0	0	0	0	0	0	0	0	0	0	0	0	0
hsa:7173	0	0	0	0	0	0	0	0	0	0	0	0	0	0	0	0	0	0	0	0	0	0	0	0	0	0	0	0	0	0	0	0	0	0	0	0	0	0	0	0	0	0	0	0	0	0	0	0	0
hsa:7174	0	0	0	0	0	0	0	0	0	0	0	0	0	0	0	1	0	0	0	0	0	0	0	0	0	0	0	0	0	0	0	0	0	0	0	0	0	0	0	0	0	0	0	0	0	0	0	0	0
hsa:7294	0	0	0	0	0	0	0	0	0	0	0	0	0	0	0	0	0	0	0	0	0	0	0	0	0	0	0	0	0	0	0	0	0	0	0	0	0	0	0	0	0	0	0	0	0	0	0	0	0
hsa:7297	0	0	0	0	0	0	0	0	0	0	0	0	0	0	0	0	0	0	0	0	0	0	0	0	0	0	0	0	0	0	0	0	0	0	0	0	0	0	0	0	0	0	0	0	0	0	0	0	0
hsa:7298	0	0	0	0	0	0	0	0	0	0	0	0	0	0	0	0	0	0	0	0	0	0	0	0	0	0	0	0	0	0	0	0	0	0	0	0	0	0	0	0	0	0	0	0	0	0	0	0	0
hsa:7299	0	0	0	0	0	0	0	0	0	0	0	0	0	0	0	0	0	0	0	0	0	0	0	0	0	0	0	0	0	0	0	0	0	0	0	0	0	0	0	0	0	0	0	0	0	0	0	0	0
hsa:7301	0	0	0	0	0	0	0	0	0	0	0	0	0	0	0	0	0	0	0	0	0	0	0	0	0	0	0	0	0	0	0	0	0	0	0	0	0	0	0	0	0	0	0	0	0	0	0	0	0
hsa:7363	0	0	0	0	0	0	0	0	0	0	0	0	0	0	0	0	0	0	0	0	0	0	0	0	0	0	0	0	0	0	0	0	0	0	0	0	0	0	0	0	0	0	0	0	0	0	0	0	0
hsa:7364	0	0	0	0	0	0	0	0	0	0	0	0	0	0	0	0	0	0	0	0	0	0	0	0	0	0	0	0	0	0	0	0	0	0	0	0	0	0	0	0	0	0	0	0	0	0	0	0	0
hsa:7365	0	0	0	0	0	0	0	0	0	0	0	0	0	0	0	0	0	0	0	0	0	0	0	0	0	0	0	0	0	0	0	0	0	0	0	0	0	0	0	0	0	0	0	0	0	0	0	0	0
hsa:7366	0	0	0	0	0	0	0	0	0	0	0	0	0	0	0	0	0	0	0	0	0	0	0	0	0	0	0	0	0	0	0	0	0	0	0	0	0	0	0	0	0	0	0	0	0	0	0	0	0
hsa:7367	0	0	0	0	0	0	0	0	0	0	0	0	0	0	0	0	0	0	0	0	0	0	0	0	0	0	0	0	0	0	0	0	0	0	0	0	0	0	0	0	0	0	0	0	0	0	0	0	0
hsa:7371	0	0	0	0	0	0	0	0	0	0	0	1	0	0	0	0	0	0	0	0	0	0	0	0	0	0	0	0	0	0	0	0	0	0	0	0	0	0	0	0	0	0	0	0	0	0	0	0	0
hsa:7372	0	0	0	0	0	0	0	0	0	0	0	0	0	0	0	0	0	0	0	0	0	0	0	0	0	0	0	0	0	0	0	0	0	0	0	0	0	0	0	0	0	0	0	0	0	0	0	0	0
hsa:7378	0	0	0	0	0	0	0	0	0	0	0	0	0	0	0	0	0	0	0	0	0	0	0	0	0	0	0	0	0	0	0	0	0	0	0	0	0	0	0	0	0	0	0	0	0	0	0	0	0
hsa:7453	0	0	0	0	0	0	0	0	0	0	0	0	0	0	0	0	0	0	0	0	0	0	0	0	0	0	0	0	0	0	0	0	0	0	0	0	0	0	0	0	0	0	0	0	0	0	0	0	0
hsa:7498	0	1	0	0	0	0	0	0	0	0	0	0	0	0	0	0	0	0	0	0	0	0	0	0	0	0	0	0	0	0	0	0	0	0	0	0	0	0	0	0	0	0	0	0	0	0	0	0	0
hsa:7525	0	0	0	0	0	0	0	0	0	0	0	0	0	0	0	0	0	0	0	0	0	0	0	0	0	0	0	0	0	0	0	0	0	0	0	0	0	0	0	0	0	0	0	0	0	0	0	0	0
hsa:7535	0	0	0	0	0	0	0	0	0	0	0	0	0	0	0	0	0	0	0	0	0	0	0	0	0	0	0	0	0	0	0	0	0	0	0	0	0	0	0	0	0	0	0	0	0	0	0	0	0
hsa:759	0	0	0	0	0	0	0	0	0	0	0	0	0	0	0	0	0	0	0	0	0	0	0	0	0	0	0	0	0	0	0	0	0	0	0	0	0	0	0	0	0	0	0	0	0	0	0	0	0
hsa:760	0	0	0	0	0	0	0	0	0	0	0	0	0	0	0	0	0	0	0	0	0	0	0	0	0	0	0	0	0	0	0	0	0	0	0	0	0	0	0	0	0	0	0	0	0	0	0	0	0
hsa:761	0	0	0	0	0	0	0	0	0	0	0	0	0	0	0	0	0	0	0	0	0	0	0	0	0	0	0	0	0	0	0	0	0	0	0	0	0	0	0	0	0	0	0	0	0	0	0	0	0
hsa:762	0	0	0	0	0	0	0	0	0	0	0	0	0	0	0	0	0	0	0	0	0	0	0	0	0	0	0	0	0	0	0	0	0	0	0	0	0	0	0	0	0	0	0	0	0	0	0	0	0
hsa:763	0	0	0	0	0	0	0	0	0	0	0	0	0	0	0	0	0	0	0	0	0	0	0	0	0	0	0	0	0	0	0	0	0	0	0	0	0	0	0	0	0	0	0	0	0	0	0	0	0
hsa:765	0	0	0	0	0	0	0	0	0	0	0	0	0	0	0	0	0	0	0	0	0	0	0	0	0	0	0	0	0	0	0	0	0	0	0	0	0	0	0	0	0	0	0	0	0	0	0	0	0
hsa:766	0	0	0	0	0	0	0	0	0	0	0	0	0	0	0	0	0	0	0	0	0	0	0	0	0	0	0	0	0	0	0	0	0	0	0	0	0	0	0	0	0	0	0	0	0	0	0	0	0
hsa:767	0	0	0	0	0	0	0	0	0	0	0	0	0	0	0	0	0	0	0	0	0	0	0	0	0	0	0	0	0	0	0	0	0	0	0	0	0	0	0	0	0	0	0	0	0	0	0	0	0
hsa:768	0	0	0	0	0	0	0	0	0	0	0	0	0	0	0	0	0	0	0	0	0	0	0	0	0	0	0	0	0	0	0	0	0	0	0	0	0	0	0	0	0	0	0	0	0	0	0	0	0
hsa:771	0	0	0	0	0	0	0	0	0	0	0	0	0	0	0	0	0	0	0	0	0	0	0	0	0	0	0	0	0	0	0	0	0	0	0	0	0	0	0	0	0	0	0	0	0	0	0	0	0
hsa:780	0	0	0	0	0	0	0	0	0	0	0	0	0	0	0	0	0	0	0	0	0	0	0	0	0	0	0	0	0	0	0	0	0	0	0	0	0	0	0	0	0	0	0	0	0	0	0	0	0
hsa:79001	0	0	0	0	0	0	0	0	0	0	0	0	0	0	0	0	0	0	0	0	0	0	0	0	0	0	0	0	0	0	0	0	0	0	0	0	0	0	0	0	0	0	0	0	0	0	0	0	0
hsa:7957	0	0	0	0	0	0	0	0	0	0	0	0	0	0	0	0	0	0	0	0	0	0	0	0	0	0	0	0	1	0	0	0	0	0	0	0	0	0	0	0	0	0	0	0	0	0	0	0	0
hsa:79799	0	0	0	0	0	0	0	0	0	0	0	0	0	0	0	0	0	0	0	0	0	0	0	0	0	0	0	0	0	0	0	0	0	0	0	0	0	0	0	0	0	0	0	0	0	0	0	0	0
hsa:80339	0	0	0	0	0	0	0	0	0	0	0	0	0	0	0	0	0	0	0	0	0	0	0	0	0	0	0	0	0	0	0	0	0	0	0	0	0	0	0	0	0	0	0	0	0	0	0	0	0
hsa:80824	0	0	0	0	0	0	0	0	0	0	0	0	0	0	0	0	0	0	0	0	0	0	0	0	0	0	0	0	1	0	0	0	0	0	0	0	0	0	0	0	0	0	0	0	0	0	0	0	0
hsa:81579	0	0	0	0	0	0	0	0	0	0	0	0	0	0	0	0	0	0	0	0	0	0	0	0	0	0	0	0	0	0	0	0	0	0	0	0	0	0	0	0	0	0	0	0	0	0	0	0	0
hsa:8192	0	0	0	0	0	0	0	0	0	0	0	0	0	0	0	1	0	0	0	0	0	0	0	0	0	0	0	0	0	0	0	0	0	0	0	0	0	0	0	0	0	0	0	0	0	0	0	0	0
hsa:8288	0	0	0	0	0	0	0	0	0	0	0	0	0	0	0	0	0	0	0	0	0	0	0	0	0	0	1	0	0	0	0	0	0	0	0	0	0	0	0	0	0	0	0	0	0	0	0	0	0
hsa:834	0	0	0	0	0	0	0	0	0	0	0	0	0	0	0	0	0	0	0	0	0	0	0	0	0	0	0	0	0	0	0	0	0	0	0	0	0	0	0	0	0	0	0	0	0	0	0	0	0
hsa:8398	0	0	0	0	0	0	0	0	0	0	0	0	0	0	0	0	0	0	0	0	0	0	0	0	0	0	0	0	0	0	0	0	0	0	0	0	0	0	0	0	0	0	0	0	0	0	0	0	0
hsa:8399	0	0	0	0	0	0	0	0	0	0	0	0	0	0	0	0	0	0	0	0	0	0	0	0	0	0	0	0	0	0	0	0	0	0	0	0	0	0	0	0	0	0	0	0	0	0	0	0	0
hsa:84152	0	0	0	0	0	0	0	0	0	0	0	0	0	0	0	0	0	0	0	0	0	0	0	0	0	0	0	0	1	0	0	0	0	0	0	0	0	0	0	0	0	0	0	0	0	0	0	0	0
hsa:84171	0	0	0	0	0	0	0	0	0	0	0	0	0	0	0	0	0	0	0	0	0	0	0	0	0	0	0	0	0	0	0	0	0	0	0	0	0	0	0	0	0	0	0	0	0	0	0	0	0
hsa:8435	0	0	0	0	0	0	0	0	0	0	0	0	0	0	0	0	0	0	0	0	0	0	0	0	0	0	0	0	0	0	0	0	0	0	0	0	0	0	0	0	0	0	0	0	0	0	0	0	0
hsa:84532	0	0	0	0	0	0	0	0	0	0	0	0	0	0	0	0	0	0	0	0	0	0	0	0	0	0	0	0	0	0	0	0	0	0	0	0	0	0	0	0	0	0	0	0	0	0	0	0	0
hsa:84618	0	0	0	0	0	0	0	0	0	0	0	0	0	0	0	0	0	0	0	0	0	0	0	0	0	0	0	0	0	0	0	0	0	0	0	0	0	0	0	0	0	0	0	0	0	0	0	0	0
hsa:84695	0	0	0	0	0	0	0	0	0	0	0	0	0	0	0	0	0	0	0	0	0	0	0	0	0	0	0	0	0	0	0	0	0	0	0	0	0	0	0	0	0	0	0	0	0	0	0	0	0
hsa:84706	0	0	0	0	0	0	0	0	0	0	0	0	0	0	0	0	0	0	0	0	0	0	0	0	0	0	0	0	0	0	0	0	0	0	0	0	0	0	0	0	0	0	0	0	0	0	0	0	0
hsa:84812	0	0	0	0	0	0	0	0	0	0	0	0	0	0	0	0	0	0	0	0	0	0	0	0	0	0	0	0	0	0	0	0	0	0	0	0	0	0	0	0	0	0	0	0	0	0	0	0	0
hsa:8513	0	0	0	0	0	0	0	0	0	0	0	0	0	0	0	0	0	0	0	0	0	0	0	0	0	0	0	0	0	0	0	0	0	0	0	0	0	0	0	0	0	0	0	0	0	0	0	0	0
hsa:8529	0	0	0	0	0	0	0	0	0	0	0	0	0	0	0	0	0	0	0	0	0	0	0	0	0	0	0	0	0	0	0	0	0	0	0	0	0	0	0	0	1	0	0	0	0	0	0	0	0
hsa:85313	0	0	0	0	0	0	0	0	0	0	0	0	0	0	0	0	0	0	0	0	0	0	0	0	0	0	0	0	1	0	0	0	0	0	0	0	0	0	0	0	0	0	0	0	0	0	0	0	0
hsa:8555	0	0	0	0	0	0	0	0	0	0	0	0	0	0	0	0	0	0	0	0	0	0	0	0	0	0	0	0	1	0	0	0	0	0	0	0	0	0	0	0	0	0	0	0	0	0	0	0	0
hsa:8556	0	0	0	0	0	0	0	0	0	0	0	0	0	0	0	0	0	0	0	0	0	0	0	0	0	0	0	0	1	0	0	0	0	0	0	0	0	0	0	0	0	0	0	0	0	0	0	0	0
hsa:8558	0	0	0	0	0	0	0	0	0	0	0	0	0	0	0	0	0	0	0	0	0	0	0	0	0	0	0	0	0	0	0	0	0	0	0	0	0	0	0	0	0	0	0	0	0	0	0	0	0
hsa:8622	0	0	0	0	0	0	0	0	0	0	0	0	0	0	0	0	0	0	0	0	0	0	0	0	0	0	0	0	0	0	0	0	0	0	0	0	0	0	0	0	0	0	0	0	0	0	0	0	0
hsa:8654	0	0	0	0	0	0	0	0	0	0	0	1	0	0	0	0	0	0	0	0	0	0	0	0	0	0	0	0	0	0	0	0	0	0	0	0	0	0	0	0	0	0	0	0	0	0	0	0	0
hsa:8836	0	0	0	0	0	0	0	0	0	0	0	0	0	0	0	0	0	0	0	0	0	0	0	1	0	0	0	0	0	0	0	0	0	0	0	0	0	0	0	0	0	0	0	0	0	0	0	0	0
hsa:8854	0	0	0	0	0	0	0	0	0	0	0	0	0	0	0	0	0	0	0	0	0	0	0	0	0	1	0	0	0	0	0	0	0	0	0	0	0	0	0	0	0	0	0	0	0	0	0	0	0
hsa:8940	0	0	0	0	0	0	0	0	0	0	0	0	0	0	0	0	0	0	0	0	0	0	0	0	0	0	0	0	0	0	0	0	0	0	0	0	0	0	0	0	0	0	0	0	0	0	0	0	0
hsa:8972	0	0	0	0	0	0	0	0	0	0	0	0	0	0	0	0	0	0	0	0	0	0	0	0	0	0	0	0	0	0	0	0	0	0	0	0	0	0	0	0	0	0	0	0	0	0	0	0	0
hsa:90	0	0	0	0	0	0	0	0	0	0	0	0	0	0	0	0	0	0	0	0	0	0	0	0	0	0	0	0	0	0	0	0	0	0	0	0	0	0	0	0	0	0	0	0	0	0	0	0	0
hsa:9023	0	0	0	0	0	0	0	0	0	0	0	0	0	0	0	0	0	0	0	0	0	0	0	0	0	0	0	0	0	0	0	0	0	0	0	0	0	0	0	0	1	0	0	0	0	0	0	0	0
hsa:9088	0	0	0	0	0	0	0	0	0	0	0	0	0	0	0	0	0	0	0	0	0	0	0	0	0	0	0	0	0	0	0	0	0	0	0	0	0	0	0	0	0	0	0	0	0	0	0	0	0
hsa:91	0	0	0	0	0	0	0	0	0	0	0	0	0	0	0	0	0	0	0	0	0	0	0	0	0	0	0	0	0	0	0	0	0	0	0	0	0	0	0	0	0	0	0	0	0	0	0	0	0
hsa:91039	0	0	0	0	0	0	0	0	0	0	0	0	0	0	0	1	0	0	0	0	0	0	0	0	0	0	0	0	0	0	0	0	0	0	0	0	0	0	0	0	0	0	0	0	0	0	0	0	0
hsa:9150	0	0	0	0	0	0	0	0	0	0	0	0	0	0	0	0	0	0	0	0	0	0	0	0	0	0	0	0	1	0	0	0	0	0	0	0	0	0	0	0	0	0	0	0	0	0	0	0	0
hsa:93	0	0	0	0	0	0	0	0	0	0	0	0	0	0	0	0	0	0	0	0	0	0	0	0	0	0	0	0	0	0	0	0	0	0	0	0	0	0	0	0	0	0	0	0	0	0	0	0	0
hsa:93650	0	0	0	0	0	0	0	0	0	0	0	0	0	0	0	0	0	0	0	0	0	0	0	0	0	0	0	1	0	0	0	0	0	0	0	0	0	0	0	0	0	0	0	0	0	0	0	0	0
hsa:9388	0	0	0	0	0	0	0	0	0	0	0	0	0	0	0	0	0	0	0	0	0	0	0	0	0	0	0	0	0	0	0	0	0	0	0	0	0	0	0	0	0	0	0	0	0	0	0	0	0
hsa:94	0	0	0	0	0	0	0	0	0	0	0	0	0	0	0	0	0	0	0	0	0	0	0	0	0	0	0	0	0	0	0	0	0	0	0	0	0	0	0	0	0	0	0	0	0	0	0	0	0
hsa:94009	0	0	0	0	0	0	0	0	0	0	0	0	0	0	0	1	0	0	0	0	0	0	0	0	0	0	0	0	0	0	0	0	0	0	0	0	0	0	0	0	0	0	0	0	0	0	0	0	0
hsa:9420	0	0	0	0	0	0	0	0	0	0	0	0	0	0	0	0	0	0	0	0	0	0	0	0	0	0	0	0	0	0	0	0	0	0	0	0	0	0	0	0	1	0	0	0	0	0	0	0	0
hsa:9563	0	0	0	0	0	0	0	0	0	0	0	0	0	0	0	0	0	0	0	0	0	0	0	0	0	0	0	0	0	0	0	0	0	0	0	0	0	0	0	0	0	0	0	0	0	0	0	0	0
hsa:9601	0	0	0	0	0	0	0	0	0	0	0	0	0	0	0	0	0	0	0	0	0	0	0	0	0	0	0	0	0	0	0	0	0	0	0	0	0	0	0	0	0	0	0	0	0	0	0	0	0
hsa:9641	0	0	0	0	0	0	0	0	0	0	0	0	0	0	0	0	0	0	0	0	0	0	0	0	0	0	0	0	0	0	0	0	0	0	0	0	0	0	0	0	0	0	0	0	0	0	0	0	0
hsa:9647	0	0	0	0	0	0	0	0	0	0	0	0	0	0	0	0	0	0	0	0	0	0	0	0	0	0	0	0	1	0	0	0	0	0	0	0	0	0	0	0	0	0	0	0	0	0	0	0	0
hsa:983	0	0	0	0	0	0	0	0	0	0	0	0	0	0	0	0	0	0	0	0	0	0	0	0	0	0	0	0	0	0	0	0	0	0	0	0	0	0	0	0	0	0	0	0	0	0	0	0	0
hsa:9945	0	0	0	0	0	0	0	0	0	0	0	0	0	0	0	0	0	0	0	0	0	0	0	0	0	0	0	0	0	0	0	0	0	0	0	0	0	0	0	0	0	0	0	0	0	0	0	0	0
hsa:9955	0	0	0	0	0	0	0	0	0	0	0	1	0	0	0	0	0	0	0	0	0	0	0	0	0	0	0	0	0	0	0	0	0	0	0	0	0	0	0	0	0	0	0	0	0	0	0	0	0
[truncated: 396 more columns]

## Sheet: drug similarity
Table S10 Enzymes (Es) dataset drug-drug similarity network
1	0.515625	0.038462	0.084746	0.098039	0.12	0.083333	0.090909	0.1	0.019608	0.177778	0.055556	0.104167	0.019608	0.04	0.057692	0.4	0.104167	0.224138	0.032258	0.340426	0.057692	0.039216	0.245902	0.056604	0	0.102041	0.038462	0.108696	0.075472	0.109091	0.131148	0.228571	0.092593	0.196429	0.138462	0.148148	0.034483	0.166667	0.186441	0.153846	0.189655	0.241935	0.181818	0.084507	0.148148	0.047619	0.235294	0.157895	0.06
0.469697	1	0.032787	0.073529	0.083333	0.083333	0.109091	0.095238	0.084746	0.016667	0.087719	0.047619	0.050847	0.051724	0.051724	0.103448	0.333333	0.068966	0.481481	0.042857	0.285714	0.103448	0.050847	0.231884	0.048387	0.027397	0.067797	0.067797	0.11	0.081967	0.129032	0.147059	0.202532	0.096774	0.169231	0.136986	0.126984	0.061538	0.125	0.144928	0.15	0.181818	0.228571	0.193548	0.178082	0.145161	0.086957	0.2	0.136364	0.050847
0.038462	0.032787	1	0.428571	0.1	0.375	0	0.238095	0.4	0.2	0.055556	0.4375	0.1875	0.384615	0.384615	0.05	0.074074	0.1875	0.057143	0.304348	0.035714	0.166667	0.461538	0.272727	0.294118	0.103448	0.176471	0.538462	0.014925	0.15	0.173913	0.129032	0	0.25	0	0.081081	0.12	0.04	0.16	0.058824	0	0.129032	0.264706	0.068966	0.075	0.12	0	0.035714	0.103448	0.461538
0.084746	0.073529	0.428571	1	0.066667	0.230769	0	0.2	0.24	0.12	0.074074	0.32	0.115385	0.217391	0.217391	0.068966	0.054054	0.115385	0.093023	0.333333	0.026316	0.107143	0.26087	0.333333	0.230769	0.076923	0.111111	0.304348	0.012987	0.1	0.121212	0.097561	0	0.206897	0.075	0.06383	0.085714	0.090909	0.181818	0.095238	0	0.153846	0.292683	0.051282	0.12766	0.117647	0	0.026316	0.135135	0.318182
0.098039	0.083333	0.1	0.066667	1	0.090909	0	0.076923	0.095238	0.052632	0	0.086957	0	0.052632	0.111111	0.045455	0.192308	0	0.181818	0.032258	0.192308	0	0.105263	0.047619	0.090909	0.0625	0.047619	0.157895	0.129032	0	0.035714	0.088235	0.125	0.08	0.029412	0.135135	0.034483	0.037037	0.033333	0.055556	0.076923	0.027778	0.046512	0.03125	0.097561	0	0.133333	0.192308	0.030303	0.05
0.12	0.083333	0.375	0.230769	0.090909	1	0.176471	0.166667	0.642857	0.176471	0.4	0.190476	0.615385	0.333333	0.333333	0.045455	0.148148	0.5	0.114286	0.142857	0.107143	0.277778	0.3125	0.257143	0.2	0.096774	0.571429	0.222222	0.014493	0.470588	0.380952	0.275862	0.08	0.5	0.166667	0.05	0.304348	0.037037	0.47619	0.151515	0.166667	0.275862	0.25	0.222222	0.153846	0.363636	0	0.068966	0.259259	0.3125
0.083333	0.109091	0	0	0	0.176471	1	0.043478	0.1875	0	0.214286	0	0.214286	0	0	0	0.125	0.214286	0.206897	0	0.227273	0.583333	0	0.142857	0	0	0.2	0	0.03125	0.166667	0.190476	0.137931	0.06383	0.15	0.148148	0	0.181818	0	0.173913	0.133333	0.2	0.137931	0.108108	0.115385	0.108108	0.181818	0.034483	0.08	0.153846	0
0.090909	0.095238	0.238095	0.2	0.076923	0.166667	0.043478	1	0.173913	0.263158	0	0.208333	0.136364	0.142857	0.142857	0	0.129032	0.136364	0.075	0.2	0.166667	0.173913	0.190476	0.170732	0.473684	0.117647	0.130435	0.130435	0.104478	0.115385	0.1	0.108108	0.074074	0.148148	0.026316	0.15	0.096774	0.066667	0.09375	0.105263	0	0.108108	0.139535	0.027778	0.113636	0.096774	0.1875	0.166667	0.085714	0.388889
0.1	0.084746	0.4	0.24	0.095238	0.642857	0.1875	0.173913	1	0.1875	0.25	0.2	0.333333	0.357143	0.357143	0.047619	0.2	0.428571	0.117647	0.148148	0.153846	0.294118	0.333333	0.228571	0.210526	0.1	0.4	0.235294	0.014706	0.333333	0.333333	0.2	0.06	0.368421	0.133333	0.051282	0.26087	0.038462	0.304348	0.088235	0.125	0.2	0.222222	0.185185	0.1	0.26087	0	0.111111	0.178571	0.333333
0.019608	0.016667	0.2	0.12	0.052632	0.176471	0	0.263158	0.1875	1	0	0.166667	0.214286	0.230769	0.230769	0	0.038462	0.214286	0	0.12	0.038462	0.1875	0.214286	0.081081	0.333333	0.25	0.2	0.2	0.064516	0.166667	0.136364	0.1	0.06383	0.15	0	0.085714	0.130435	0	0.125	0.0625	0	0.1	0.078947	0	0	0.130435	0.111111	0.125	0.071429	0.214286
0.177778	0.087719	0.055556	0.074074	0	0.4	0.214286	0	0.25	0	1	0	0.384615	0.0625	0.0625	0	0.166667	0.5	0.090909	0	0.12	0.111111	0.058824	0.171429	0	0	0.266667	0	0	0.222222	0.181818	0.133333	0.085106	0.2	0.230769	0	0.173913	0	0.333333	0.206897	0.190476	0.214286	0.166667	0.2	0.105263	0.173913	0	0.12	0.24	0.058824
0.055556	0.047619	0.4375	0.32	0.086957	0.190476	0	0.208333	0.2	0.166667	0	1	0.157895	0.166667	0.235294	0	0.066667	0.157895	0.081081	0.5	0.066667	0.142857	0.222222	0.216216	0.25	0.09375	0.210526	0.4375	0.028986	0.130435	0.111111	0.117647	0.018519	0.166667	0.028571	0.075	0.148148	0.074074	0.103448	0.083333	0	0.117647	0.210526	0.030303	0.045455	0.107143	0	0.066667	0.09375	0.294118
0.104167	0.050847	0.1875	0.115385	0	0.615385	0.214286	0.136364	0.333333	0.214286	0.384615	0.157895	1	0.214286	0.214286	0	0.12	0.8	0.090909	0.115385	0.12	0.333333	0.2	0.205882	0.166667	0.107143	0.727273	0.1875	0	0.571429	0.368421	0.259259	0.085106	0.411765	0.185185	0	0.35	0	0.4	0.166667	0.190476	0.259259	0.2	0.153846	0.135135	0.421053	0	0.076923	0.24	0.2
0.019608	0.051724	0.384615	0.217391	0.052632	0.333333	0	0.142857	0.357143	0.230769	0.0625	0.166667	0.214286	1	0.777778	0.1875	0.038462	0.214286	0.09375	0.12	0	0.1875	0.7	0.142857	0.176471	0.2	0.2	0.384615	0.03125	0.235294	0.25	0.178571	0.041667	0.352941	0.033333	0.085714	0.130435	0.090909	0.173913	0	0.043478	0.178571	0.138889	0.115385	0.078947	0.238095	0.071429	0	0.153846	0.307692
0.04	0.051724	0.384615	0.217391	0.111111	0.333333	0	0.142857	0.357143	0.230769	0.0625	0.235294	0.214286	0.777778	1	0.117647	0.08	0.214286	0.09375	0.12	0.038462	0.1875	0.7	0.142857	0.176471	0.153846	0.285714	0.5	0.03125	0.235294	0.25	0.137931	0.041667	0.277778	0.068966	0.085714	0.181818	0.043478	0.173913	0.030303	0.043478	0.137931	0.138889	0.074074	0.051282	0.181818	0.034483	0.038462	0.111111	0.307692
0.057692	0.103448	0.05	0.068966	0.045455	0.045455	0	0	0.047619	0	0	0	0	0.1875	0.117647	1	0	0	0.085714	0	0	0	0.176471	0.02381	0	0.137931	0	0.05	0.061538	0.043478	0.12	0.090909	0.06	0.238095	0.030303	0.108108	0.035714	0.173913	0.071429	0.027778	0.038462	0.090909	0.047619	0.103448	0.128205	0.074074	0.064516	0	0.064516	0
0.4	0.333333	0.074074	0.054054	0.192308	0.148148	0.125	0.129032	0.2	0.038462	0.166667	0.066667	0.12	0.038462	0.08	0	1	0.12	0.277778	0.026316	0.809524	0.071429	0.076923	0.186047	0.068966	0	0.16	0.074074	0.084507	0.103448	0.125	0.128205	0.22	0.133333	0.166667	0.113636	0.193548	0.029412	0.117647	0.153846	0.206897	0.128205	0.181818	0.212121	0.083333	0.15625	0.078947	0.52	0.138889	0.076923
0.104167	0.068966	0.1875	0.115385	0	0.5	0.214286	0.136364	0.428571	0.214286	0.5	0.157895	0.8	0.214286	0.214286	0	0.12	1	0.090909	0.115385	0.12	0.333333	0.2	0.205882	0.166667	0.107143	0.583333	0.1875	0	0.466667	0.3	0.214286	0.085106	0.333333	0.142857	0	0.35	0	0.333333	0.129032	0.190476	0.214286	0.2	0.153846	0.105263	0.35	0	0.12	0.192308	0.2
0.224138	0.481481	0.057143	0.093023	0.181818	0.114286	0.206897	0.075	0.117647	0	0.090909	0.081081	0.090909	0.09375	0.09375	0.085714	0.277778	0.090909	1	0.044444	0.352941	0.1875	0.090909	0.340909	0.054054	0.042553	0.121212	0.121212	0.103896	0.142857	0.222222	0.209302	0.210526	0.166667	0.219512	0.14	0.216216	0.102564	0.15	0.204545	0.228571	0.268293	0.304348	0.263158	0.25	0.216216	0.065217	0.210526	0.195122	0.058824
0.032258	0.042857	0.304348	0.333333	0.032258	0.142857	0	0.2	0.148148	0.12	0	0.5	0.115385	0.12	0.12	0	0.026316	0.115385	0.044444	1	0.026316	0.107143	0.16	0.181818	0.230769	0.076923	0.111111	0.25	0.012987	0.1	0.088235	0.097561	0	0.129032	0	0.041667	0.085714	0.2	0.083333	0.045455	0	0.097561	0.204545	0.025	0.12766	0.085714	0	0.026316	0.076923	0.26087
0.340426	0.285714	0.035714	0.026316	0.192308	0.107143	0.227273	0.166667	0.153846	0.038462	0.12	0.066667	0.12	0	0.038462	0	0.809524	0.12	0.352941	0.026316	1	0.153846	0.037037	0.186047	0.068966	0	0.16	0.074074	0.1	0.103448	0.125	0.128205	0.22	0.133333	0.166667	0.113636	0.193548	0.029412	0.117647	0.153846	0.206897	0.128205	0.155556	0.176471	0.106383	0.15625	0.108108	0.52	0.138889	0.037037
0.057692	0.103448	0.166667	0.107143	0	0.277778	0.583333	0.173913	0.294118	0.1875	0.111111	0.142857	0.333333	0.1875	0.1875	0	0.071429	0.333333	0.1875	0.107143	0.153846	1	0.176471	0.228571	0.15	0.1	0.3125	0.166667	0.029851	0.263158	0.272727	0.2	0.081633	0.3	0.096774	0	0.318182	0	0.25	0.088235	0.173913	0.2	0.157895	0.142857	0.1	0.26087	0.03125	0.071429	0.178571	0.176471
0.039216	0.050847	0.461538	0.26087	0.105263	0.3125	0	0.190476	0.333333	0.214286	0.058824	0.222222	0.2	0.7	0.7	0.176471	0.076923	0.2	0.090909	0.16	0.037037	0.176471	1	0.171429	0.235294	0.192308	0.1875	0.357143	0.030769	0.222222	0.238095	0.172414	0.040816	0.333333	0.032258	0.083333	0.125	0.136364	0.166667	0.029412	0.041667	0.172414	0.166667	0.111111	0.076923	0.227273	0.068966	0.037037	0.148148	0.384615
0.245902	0.231884	0.272727	0.333333	0.047619	0.257143	0.142857	0.170732	0.228571	0.081081	0.171429	0.216216	0.205882	0.142857	0.142857	0.02381	0.186047	0.205882	0.340909	0.181818	0.186047	0.228571	0.171429	1	0.157895	0.058824	0.2	0.2	0.022727	0.184211	0.25641	0.325581	0.121212	0.27027	0.25	0.050847	0.282051	0.043478	0.307692	0.288889	0.2	0.425	0.805556	0.261905	0.160714	0.282051	0.018868	0.108696	0.285714	0.205882
0.056604	0.048387	0.294118	0.230769	0.090909	0.2	0	0.473684	0.210526	0.333333	0	0.25	0.166667	0.176471	0.176471	0	0.068966	0.166667	0.054054	0.230769	0.068966	0.15	0.235294	0.157895	1	0.172414	0.157895	0.157895	0.060606	0.136364	0.115385	0.121212	0.038462	0.173913	0	0.166667	0.111111	0.076923	0.107143	0.151515	0	0.121212	0.153846	0.03125	0.071429	0.111111	0.096774	0.107143	0.096774	0.5
0	0.027397	0.103448	0.076923	0.0625	0.096774	0	0.117647	0.1	0.25	0	0.09375	0.107143	0.2	0.153846	0.137931	0	0.107143	0.042553	0.076923	0	0.1	0.192308	0.058824	0.172414	1	0.103448	0.103448	0.176471	0.129032	0.147059	0.205128	0.084746	0.193548	0.022727	0.238095	0.081081	0.151515	0.108108	0.066667	0.027027	0.119048	0.078431	0.075	0.195652	0.142857	0.157895	0.051282	0.1	0.107143
0.102041	0.067797	0.176471	0.111111	0.047619	0.571429	0.2	0.130435	0.4	0.2	0.266667	0.210526	0.727273	0.2	0.285714	0	0.16	0.583333	0.121212	0.111111	0.16	0.3125	0.1875	0.2	0.157895	0.103448	1	0.25	0.014925	0.642857	0.35	0.25	0.106383	0.388889	0.222222	0.025641	0.473684	0	0.380952	0.16129	0.181818	0.25	0.194444	0.148148	0.162162	0.473684	0	0.115385	0.230769	0.1875
0.038462	0.067797	0.538462	0.304348	0.157895	0.222222	0	0.130435	0.235294	0.2	0	0.4375	0.1875	0.384615	0.5	0.05	0.074074	0.1875	0.121212	0.25	0.074074	0.166667	0.357143	0.2	0.157895	0.103448	0.25	1	0.030303	0.15	0.173913	0.09375	0.04	0.190476	0.03125	0.052632	0.166667	0	0.16	0.028571	0	0.09375	0.194444	0	0.02381	0.12	0	0.074074	0.066667	0.1875
0.108696	0.11	0.014925	0.012987	0.129032	0.014493	0.03125	0.104478	0.014706	0.064516	0	0.028986	0	0.03125	0.03125	0.061538	0.084507	0	0.103896	0.012987	0.1	0.029851	0.030769	0.022727	0.060606	0.176471	0.014925	0.030303	1	0.014286	0.041667	0.064103	0.219512	0.057971	0.025316	0.294118	0.013333	0.072464	0.013158	0.076923	0.072464	0.050633	0.022472	0.097222	0.166667	0.027027	0.212121	0.132353	0.052632	0.015152
0.075472	0.081967	0.15	0.1	0	0.470588	0.166667	0.115385	0.333333	0.166667	0.222222	0.130435	0.571429	0.235294	0.235294	0.043478	0.103448	0.466667	0.142857	0.1	0.103448	0.263158	0.222222	0.184211	0.136364	0.129032	0.642857	0.15	0.014286	1	0.363636	0.266667	0.1	0.4	0.241379	0.02381	0.347826	0.035714	0.391304	0.114286	0.208333	0.266667	0.210526	0.172414	0.179487	0.47619	0.029412	0.103448	0.25	0.157895
0.109091	0.129032	0.173913	0.121212	0.035714	0.380952	0.190476	0.1	0.333333	0.136364	0.181818	0.111111	0.368421	0.25	0.25	0.12	0.125	0.3	0.222222	0.088235	0.125	0.272727	0.238095	0.25641	0.115385	0.147059	0.35	0.173913	0.041667	0.363636	1	0.448276	0.204082	0.52381	0.25	0.068182	0.458333	0.064516	0.565217	0.228571	0.375	0.5	0.282051	0.310345	0.190476	0.521739	0.054054	0.090909	0.392857	0.130435
0.131148	0.147059	0.129032	0.097561	0.088235	0.275862	0.137931	0.108108	0.2	0.1	0.133333	0.117647	0.259259	0.178571	0.137931	0.090909	0.128205	0.214286	0.209302	0.097561	0.128205	0.2	0.172414	0.325581	0.121212	0.205128	0.25	0.09375	0.064103	0.266667	0.448276	1	0.196429	0.37931	0.297297	0.1	0.482759	0.078947	0.466667	0.342105	0.28125	0.5625	0.348837	0.277778	0.208333	0.387097	0.068182	0.1	0.382353	0.133333
0.211268	0.202532	0	0	0.125	0.08	0.06383	0.074074	0.06	0.06383	0.085106	0.018519	0.085106	0.041667	0.041667	0.06	0.22	0.085106	0.210526	0	0.22	0.081633	0.040816	0.121212	0.038462	0.084746	0.106383	0.04	0.234568	0.1	0.204082	0.196429	1	0.14	0.160714	0.2	0.2	0.054545	0.150943	0.192982	0.234043	0.196429	0.136364	0.3125	0.102941	0.176471	0.185185	0.22	0.142857	0
0.092593	0.096774	0.25	0.206897	0.08	0.5	0.15	0.148148	0.368421	0.15	0.2	0.166667	0.411765	0.352941	0.277778	0.238095	0.133333	0.333333	0.166667	0.129032	0.133333	0.3	0.333333	0.27027	0.173913	0.193548	0.388889	0.190476	0.057971	0.4	0.52381	0.37931	0.14	1	0.151515	0.125	0.32	0.148148	0.416667	0.171429	0.24	0.37931	0.297297	0.285714	0.2	0.375	0.057143	0.096774	0.321429	0.2
0.196429	0.169231	0	0.075	0.029412	0.166667	0.148148	0.026316	0.133333	0	0.230769	0.028571	0.185185	0.033333	0.068966	0.030303	0.166667	0.142857	0.219512	0	0.166667	0.096774	0.032258	0.25	0	0.022727	0.222222	0.03125	0.025316	0.241379	0.25	0.297297	0.160714	0.151515	1	0.039216	0.322581	0.026316	0.354839	0.289474	0.344828	0.371429	0.272727	0.257143	0.142857	0.366667	0.022727	0.105263	0.285714	0
0.138462	0.136986	0.081081	0.06383	0.135135	0.05	0	0.15	0.051282	0.085714	0	0.075	0	0.085714	0.085714	0.108108	0.113636	0	0.14	0.041667	0.113636	0	0.083333	0.050847	0.166667	0.238095	0.025641	0.052632	0.294118	0.02381	0.068182	0.1	0.2	0.125	0.039216	1	0.021277	0.095238	0.042553	0.166667	0.022222	0.057692	0.067797	0.085106	0.211538	0.043478	0.268293	0.195122	0.061224	0.083333
0.148148	0.126984	0.12	0.085714	0.034483	0.304348	0.181818	0.096774	0.26087	0.130435	0.173913	0.148148	0.35	0.130435	0.181818	0.035714	0.193548	0.35	0.216216	0.085714	0.193548	0.318182	0.125	0.282051	0.111111	0.081081	0.473684	0.166667	0.013333	0.347826	0.458333	0.482759	0.2	0.32	0.322581	0.021277	1	0	0.48	0.333333	0.36	0.433333	0.275	0.258065	0.108696	0.5	0	0.121212	0.333333	0.125
0.034483	0.061538	0.04	0.090909	0.037037	0.037037	0	0.066667	0.038462	0	0	0.074074	0	0.090909	0.043478	0.173913	0.029412	0	0.102564	0.2	0.029412	0	0.136364	0.043478	0.076923	0.151515	0	0	0.072464	0.035714	0.064516	0.078947	0.054545	0.148148	0.026316	0.095238	0	1	0.029412	0.05	0.032258	0.078947	0.065217	0.121212	0.113636	0.0625	0.055556	0.029412	0.085714	0.136364
0.166667	0.125	0.16	0.181818	0.033333	0.47619	0.173913	0.09375	0.304348	0.125	0.333333	0.103448	0.4	0.173913	0.173913	0.071429	0.117647	0.333333	0.15	0.083333	0.117647	0.25	0.166667	0.307692	0.107143	0.108108	0.380952	0.16	0.013158	0.391304	0.565217	0.466667	0.150943	0.416667	0.354839	0.042553	0.48	0.029412	1	0.323529	0.346154	0.517241	0.333333	0.212121	0.155556	0.608696	0.025	0.055556	0.464286	0.12
0.186441	0.144928	0.058824	0.095238	0.055556	0.151515	0.133333	0.105263	0.088235	0.0625	0.206897	0.083333	0.166667	0	0.030303	0.027778	0.153846	0.129032	0.204545	0.045455	0.153846	0.088235	0.029412	0.288889	0.151515	0.066667	0.16129	0.028571	0.076923	0.114286	0.228571	0.342105	0.192982	0.171429	0.289474	0.166667	0.333333	0.05	0.323529	1	0.2	0.416667	0.282609	0.175	0.134615	0.222222	0.090909	0.153846	0.297297	0.09375
0.153846	0.15	0	0	0.076923	0.166667	0.2	0	0.125	0	0.190476	0	0.190476	0.043478	0.043478	0.038462	0.206897	0.190476	0.228571	0	0.206897	0.173913	0.041667	0.2	0	0.027027	0.181818	0	0.072464	0.208333	0.375	0.28125	0.234043	0.24	0.344828	0.022222	0.36	0.032258	0.346154	0.2	1	0.322581	0.225	0.321429	0.113636	0.36	0.085714	0.129032	0.266667	0
0.189655	0.181818	0.129032	0.153846	0.027778	0.275862	0.137931	0.108108	0.2	0.1	0.214286	0.117647	0.259259	0.178571	0.137931	0.090909	0.128205	0.214286	0.268293	0.097561	0.128205	0.2	0.172414	0.425	0.121212	0.119048	0.25	0.09375	0.050633	0.266667	0.5	0.5625	0.196429	0.37931	0.371429	0.057692	0.433333	0.078947	0.517241	0.416667	0.322581	1	0.45	0.314286	0.16	0.433333	0.044444	0.1	0.424242	0.133333
0.241935	0.228571	0.264706	0.292683	0.046512	0.25	0.108108	0.139535	0.222222	0.078947	0.166667	0.210526	0.2	0.138889	0.138889	0.047619	0.181818	0.2	0.304348	0.204545	0.155556	0.157895	0.166667	0.805556	0.153846	0.078431	0.194444	0.194444	0.022472	0.210526	0.282051	0.348837	0.136364	0.297297	0.272727	0.067797	0.275	0.065217	0.333333	0.282609	0.225	0.45	1	0.285714	0.157895	0.307692	0.018519	0.106383	0.309524	0.2
0.181818	0.193548	0.068966	0.051282	0.03125	0.222222	0.115385	0.027778	0.185185	0	0.2	0.030303	0.153846	0.115385	0.074074	0.103448	0.212121	0.153846	0.263158	0.025	0.176471	0.142857	0.111111	0.261905	0.03125	0.075	0.148148	0	0.097222	0.172414	0.310345	0.277778	0.3125	0.285714	0.257143	0.085106	0.258065	0.121212	0.212121	0.175	0.321429	0.314286	0.285714	1	0.173913	0.258065	0.04878	0.111111	0.264706	0.071429
0.084507	0.178082	0.075	0.12766	0.097561	0.153846	0.108108	0.113636	0.1	0	0.105263	0.045455	0.135135	0.078947	0.051282	0.128205	0.083333	0.105263	0.25	0.12766	0.106383	0.1	0.076923	0.160714	0.071429	0.195652	0.162162	0.02381	0.166667	0.179487	0.190476	0.208333	0.102941	0.230769	0.142857	0.211538	0.108696	0.113636	0.155556	0.134615	0.113636	0.16	0.157895	0.173913	1	0.186047	0.1	0.083333	0.145833	0.105263
0.148148	0.145161	0.12	0.117647	0	0.363636	0.181818	0.096774	0.26087	0.130435	0.173913	0.107143	0.421053	0.238095	0.181818	0.074074	0.15625	0.35	0.216216	0.085714	0.15625	0.26087	0.227273	0.282051	0.111111	0.142857	0.473684	0.12	0.027027	0.47619	0.521739	0.387097	0.176471	0.375	0.366667	0.043478	0.5	0.0625	0.608696	0.222222	0.36	0.433333	0.307692	0.258065	0.186047	1	0.052632	0.088235	0.37931	0.125
0.047619	0.086957	0	0	0.133333	0	0.034483	0.1875	0	0.111111	0	0	0	0.071429	0.034483	0.064516	0.078947	0	0.065217	0	0.108108	0.03125	0.068966	0.018868	0.096774	0.157895	0	0	0.230769	0.029412	0.054054	0.068182	0.185185	0.057143	0.022727	0.268293	0	0.055556	0.025	0.090909	0.085714	0.044444	0.018519	0.04878	0.1	0.052632	1	0.138889	0.047619	0
0.235294	0.2	0.035714	0.026316	0.192308	0.068966	0.08	0.166667	0.111111	0.125	0.12	0.066667	0.076923	0	0.038462	0	0.52	0.12	0.210526	0.026316	0.52	0.071429	0.037037	0.108696	0.107143	0.051282	0.115385	0.074074	0.132353	0.103448	0.090909	0.1	0.22	0.096774	0.105263	0.195122	0.121212	0.029412	0.055556	0.153846	0.129032	0.1	0.106383	0.111111	0.083333	0.088235	0.138889	1	0.078947	0.037037
0.157895	0.136364	0.103448	0.135135	0.030303	0.259259	0.153846	0.085714	0.178571	0.071429	0.24	0.09375	0.24	0.153846	0.111111	0.064516	0.138889	0.192308	0.195122	0.076923	0.138889	0.178571	0.148148	0.285714	0.096774	0.1	0.230769	0.066667	0.052632	0.25	0.392857	0.382353	0.142857	0.321429	0.285714	0.061224	0.333333	0.085714	0.464286	0.297297	0.266667	0.424242	0.309524	0.264706	0.145833	0.37931	0.047619	0.078947	1	0.107143
0.06	0.050847	0.461538	0.318182	0.05	0.3125	0	0.388889	0.333333	0.214286	0.058824	0.294118	0.2	0.307692	0.307692	0	0.076923	0.2	0.058824	0.26087	0.037037	0.176471	0.384615	0.205882	0.5	0.107143	0.1875	0.1875	0.015152	0.157895	0.130435	0.133333	0	0.2	0	0.083333	0.125	0.136364	0.12	0.09375	0	0.133333	0.2	0.071429	0.105263	0.125	0	0.037037	0.107143	1
0.270833	0.25	0.08	0.057143	0.208333	0.16	0.25	0.178571	0.166667	0.041667	0.181818	0.071429	0.130435	0.041667	0.086957	0	0.636364	0.130435	0.257143	0.027778	0.565217	0.166667	0.083333	0.139535	0.074074	0	0.173913	0.08	0.102941	0.111111	0.133333	0.135135	0.204082	0.142857	0.142857	0.119048	0.166667	0.03125	0.125	0.162162	0.178571	0.135135	0.136364	0.1875	0.111111	0.129032	0.114286	0.44	0.147059	0.083333
0.140351	0.138462	0.068966	0.078947	0	0.269231	0.16	0.057143	0.185185	0.074074	0.153846	0.0625	0.304348	0.115385	0.115385	0.066667	0.142857	0.25	0.2	0.051282	0.142857	0.185185	0.111111	0.261905	0.064516	0.075	0.347826	0.068966	0.025974	0.36	0.357143	0.352941	0.166667	0.241379	0.333333	0.02	0.56	0.027778	0.428571	0.27027	0.321429	0.352941	0.255814	0.235294	0.148936	0.625	0.02381	0.081081	0.433333	0.071429
0.12963	0.147541	0.173913	0.121212	0.035714	0.318182	0.25	0.178571	0.272727	0.136364	0.181818	0.153846	0.368421	0.25	0.190476	0.076923	0.2	0.368421	0.257143	0.121212	0.241379	0.333333	0.3	0.289474	0.16	0.147059	0.35	0.125	0.041667	0.363636	0.416667	0.3125	0.134615	0.391304	0.25	0.044444	0.4	0.1	0.384615	0.194444	0.32	0.3125	0.282051	0.266667	0.162791	0.521739	0.083333	0.125	0.344828	0.181818
0.057377	0.095238	0.021505	0.05	0.031915	0.021053	0.021978	0.074468	0.021277	0.033333	0	0.031579	0	0.033333	0.033333	0.066667	0.04	0	0.076923	0.05	0.050505	0.021277	0.044444	0.035398	0.043011	0.080808	0.010638	0.032609	0.222222	0.010309	0.030303	0.037736	0.094828	0.06383	0.018868	0.138614	0.009804	0.052083	0.019608	0.037383	0.01	0.028037	0.035088	0.039216	0.18	0.019802	0.07	0.061224	0.028846	0.032967
0.203704	0.15625	0	0	0.137931	0.137931	0.16	0.121212	0.103448	0.115385	0.153846	0.030303	0.153846	0.035714	0.074074	0.032258	0.25	0.153846	0.2	0	0.25	0.103448	0.034483	0.104167	0.1	0.102564	0.192308	0.068966	0.179104	0.214286	0.225806	0.179487	0.3125	0.2	0.189189	0.275	0.21875	0.027778	0.176471	0.27027	0.193548	0.179487	0.125	0.166667	0.125	0.181818	0.30303	0.37931	0.162162	0
0.114754	0.132353	0.096774	0.073171	0.028571	0.2	0.142857	0.212121	0.206897	0.230769	0.1	0.088235	0.222222	0.103448	0.103448	0.029412	0.162162	0.222222	0.214286	0.073171	0.194444	0.25	0.1	0.217391	0.16129	0.121951	0.259259	0.096774	0.093333	0.233333	0.28125	0.25641	0.222222	0.21875	0.175	0.125	0.354839	0	0.264706	0.315789	0.212121	0.25641	0.1875	0.184211	0.096154	0.3125	0.179487	0.228571	0.210526	0.1
0.057971	0.093333	0.026316	0.042553	0.108108	0.025	0	0.071429	0.025641	0.088235	0	0.02439	0	0.121212	0.088235	0.142857	0.066667	0	0.098039	0	0.066667	0	0.117647	0.016667	0.078947	0.342105	0.026316	0.054054	0.242857	0.02439	0.069767	0.102041	0.163934	0.128205	0.04	0.638889	0.021739	0.097561	0.043478	0.1	0.022727	0.038462	0.033333	0.06383	0.192308	0.044444	0.275	0.142857	0.040816	0
0.090909	0.109589	0.085714	0.090909	0.142857	0.052632	0	0.157895	0.054054	0.090909	0	0.078947	0	0.090909	0.090909	0.147059	0.093023	0	0.122449	0.043478	0.093023	0	0.088235	0.052632	0.176471	0.25	0.027027	0.055556	0.264706	0.025	0.071429	0.104167	0.166667	0.162162	0.040816	0.8125	0.022222	0.1	0.044444	0.173913	0.023256	0.06	0.070175	0.088889	0.244898	0.045455	0.282051	0.146341	0.06383	0.088235
0.084746	0.106061	0	0.025641	0.032258	0.142857	0.166667	0.058824	0.107143	0.12	0.16	0	0.16	0.076923	0.037037	0.148148	0.114286	0.16	0.146341	0	0.114286	0.107143	0.074074	0.130435	0.066667	0.2	0.2	0	0.098592	0.269231	0.275862	0.216216	0.192308	0.296296	0.194444	0.190476	0.1875	0.125	0.181818	0.243243	0.2	0.216216	0.152174	0.242424	0.204545	0.225806	0.166667	0.147059	0.166667	0
0.168831	0.192771	0	0	0.017544	0.074074	0.08	0.068966	0.055556	0.058824	0.078431	0	0.078431	0.038462	0.018868	0.075472	0.160714	0.078431	0.15873	0	0.160714	0.096154	0.037736	0.164179	0.035714	0.152542	0.098039	0	0.195402	0.134615	0.211538	0.224138	0.353846	0.150943	0.189655	0.245902	0.185185	0.068966	0.160714	0.220339	0.192308	0.224138	0.161765	0.313725	0.179104	0.185185	0.133333	0.160714	0.152542	0
0.123711	0.102804	0.056338	0.049383	0.115942	0.054795	0	0.08	0.055556	0.089552	0.013699	0.054054	0.042254	0.089552	0.089552	0.055556	0.105263	0.042254	0.069767	0.036585	0.090909	0.041096	0.088235	0.043011	0.084507	0.115385	0.056338	0.071429	0.294737	0.054054	0.064935	0.058824	0.229885	0.081081	0.023256	0.202532	0.050633	0.051948	0.05	0.045977	0.051948	0.058824	0.053763	0.04878	0.042553	0.064103	0.191781	0.135135	0.048193	0.057143
0.096774	0.132353	0.0625	0.047619	0.090909	0.058824	0.066667	0.176471	0.060606	0.103448	0.03125	0.027778	0	0.103448	0.066667	0.060606	0.131579	0	0.108696	0.023256	0.131579	0.060606	0.1	0.056604	0.090909	0.121951	0	0	0.171429	0.088235	0.078947	0.113636	0.118644	0.083333	0.021739	0.2	0	0.081081	0.02381	0.06383	0.052632	0.088889	0.075472	0.153846	0.1875	0.05	0.210526	0.102564	0.069767	0.064516
0.189189	0.141176	0.018868	0.066667	0.12	0.018182	0	0.090909	0.018519	0.019608	0	0.055556	0	0.019608	0.04	0.018519	0.145455	0	0.109375	0.04918	0.145455	0	0.039216	0.041096	0.056604	0.03125	0.018868	0.038462	0.214286	0.017857	0.033898	0.045455	0.246377	0.035088	0.046875	0.174603	0.016393	0.071429	0.016129	0.044776	0.034483	0.045455	0.054795	0.065574	0.069444	0.033333	0.1	0.166667	0.03125	0.06
0.122449	0.084746	0	0.107143	0.045455	0.277778	0.1875	0	0.157895	0	0.333333	0.043478	0.333333	0.055556	0.117647	0.047619	0.153846	0.25	0.151515	0	0.153846	0.157895	0.052632	0.228571	0	0.03125	0.3125	0.05	0.029851	0.263158	0.272727	0.241379	0.12766	0.368421	0.307692	0.051282	0.26087	0.038462	0.304348	0.275862	0.285714	0.285714	0.222222	0.185185	0.128205	0.26087	0.03125	0.111111	0.32	0
0.096154	0.081967	0.045455	0.137931	0	0.086957	0.105263	0.035714	0.142857	0	0.222222	0	0.047619	0.105263	0.105263	0.043478	0.103448	0.1	0.111111	0	0.103448	0.090909	0.1	0.153846	0	0.029412	0.045455	0	0.014286	0.083333	0.111111	0.151515	0.057692	0.12	0.285714	0.02381	0.068966	0.035714	0.142857	0.114286	0.115385	0.117647	0.15	0.172414	0.045455	0.148148	0.029412	0.066667	0.129032	0.047619
0.118644	0.086957	0	0.135135	0.030303	0.172414	0.111111	0.055556	0.1	0.153846	0.24	0	0.192308	0.034483	0.034483	0.03125	0.108108	0.148148	0.113636	0	0.108108	0.1	0.033333	0.173913	0.096774	0.1	0.142857	0	0.081081	0.166667	0.181818	0.236842	0.142857	0.233333	0.285714	0.106383	0.142857	0.027027	0.205882	0.333333	0.1875	0.205128	0.195652	0.131579	0.1	0.176471	0.128205	0.138889	0.222222	0
0.2	0.210526	0.130435	0.125	0.076923	0.12	0.263158	0.142857	0.173913	0	0.190476	0.115385	0.086957	0.043478	0.090909	0	0.346154	0.136364	0.387097	0.090909	0.458333	0.227273	0.086957	0.333333	0.12	0	0.130435	0.04	0.042254	0.115385	0.178571	0.138889	0.137255	0.107143	0.181818	0.069767	0.214286	0.066667	0.129032	0.2	0.185185	0.171429	0.25641	0.275862	0.166667	0.172414	0.027027	0.25	0.151515	0.190476
0.148936	0.125	0	0	0.047619	0.157895	0.2	0	0.235294	0	0.266667	0.045455	0.1875	0	0.058824	0	0.26087	0.266667	0.193548	0	0.26087	0.166667	0	0.166667	0	0	0.25	0.052632	0.014925	0.210526	0.173913	0.129032	0.106383	0.136364	0.222222	0.025641	0.217391	0	0.16	0.125	0.238095	0.166667	0.162162	0.192308	0.102564	0.217391	0	0.208333	0.142857	0
0.178571	0.190476	0	0	0.030303	0.214286	0.153846	0.027027	0.1	0.034483	0.192308	0	0.24	0.034483	0.034483	0.064516	0.138889	0.192308	0.25641	0	0.138889	0.137931	0.033333	0.255814	0.030303	0.073171	0.185185	0	0.038961	0.206897	0.3	0.382353	0.185185	0.193548	0.363636	0.061224	0.37931	0.027027	0.413793	0.333333	0.310345	0.424242	0.27907	0.30303	0.122449	0.333333	0.073171	0.108108	0.294118	0
0.15625	0.257576	0.052632	0.041667	0.02439	0.105263	0.151515	0.069767	0.138889	0	0.114286	0.02381	0.083333	0.085714	0.055556	0.108108	0.195122	0.083333	0.266667	0.041667	0.195122	0.138889	0.083333	0.215686	0.05	0.083333	0.081081	0	0.1	0.102564	0.146341	0.195652	0.16129	0.184211	0.204545	0.111111	0.142857	0.095238	0.139535	0.142857	0.179487	0.222222	0.211538	0.275	0.211538	0.170732	0.061224	0.113636	0.181818	0.083333
0.16	0.175439	0.043478	0.030303	0	0.3	0.294118	0.034483	0.190476	0	0.277778	0	0.277778	0.047619	0.047619	0	0.222222	0.210526	0.242424	0	0.269231	0.25	0.045455	0.277778	0	0	0.263158	0	0.014085	0.227273	0.291667	0.3	0.142857	0.208333	0.275862	0	0.391304	0	0.32	0.25	0.304348	0.3	0.236842	0.25	0.146341	0.333333	0.028571	0.1	0.241379	0.045455
0.164179	0.208333	0.047619	0.08	0.045455	0.15	0.105263	0.111111	0.097561	0.076923	0.102564	0.044444	0.131579	0.02439	0.02439	0.046512	0.152174	0.102564	0.244898	0.058824	0.152174	0.071429	0.04878	0.269231	0.121951	0.056604	0.157895	0	0.082353	0.175	0.243902	0.311111	0.206349	0.195122	0.266667	0.122807	0.268293	0.06383	0.232558	0.463415	0.25	0.404762	0.288462	0.25	0.175439	0.268293	0.098039	0.177778	0.272727	0.075
0.074074	0.046875	0.263158	0.307692	0.083333	0.181818	0	0.2	0.190476	0.466667	0.095238	0.173913	0.15	0.294118	0.294118	0.086957	0.064516	0.15	0.051282	0.133333	0.064516	0.136364	0.352941	0.15	0.3	0.241379	0.142857	0.2	0.090909	0.173913	0.148148	0.114286	0.076923	0.26087	0.088235	0.157895	0.103448	0.071429	0.222222	0.142857	0.034483	0.181818	0.175	0.060606	0.068182	0.142857	0.125	0.137931	0.16129	0.210526
0.192308	0.126984	0.037037	0.055556	0	0.25	0.181818	0	0.16	0	0.35	0	0.227273	0.04	0.04	0	0.15625	0.173913	0.153846	0	0.121212	0.115385	0.038462	0.25	0	0	0.272727	0	0.027027	0.24	0.25	0.264706	0.153846	0.137931	0.464286	0	0.384615	0	0.37037	0.294118	0.307692	0.34375	0.243902	0.258065	0.133333	0.44	0.052632	0.121212	0.290323	0.038462
0.160714	0.193548	0.068966	0.051282	0.03125	0.178571	0.16	0.121212	0.103448	0	0.153846	0.0625	0.2	0.074074	0.035714	0.103448	0.142857	0.153846	0.333333	0.078947	0.142857	0.142857	0.071429	0.232558	0.1	0.04878	0.24	0	0.039474	0.259259	0.357143	0.4375	0.211538	0.241379	0.375	0.108696	0.444444	0.121212	0.37931	0.382353	0.37037	0.483871	0.285714	0.3125	0.255814	0.392857	0.04878	0.111111	0.30303	0.111111
0.206349	0.197183	0.076923	0.130435	0.047619	0.157895	0.111111	0.142857	0.102564	0.081081	0.171429	0.046512	0.138889	0.081081	0.052632	0.075	0.186047	0.108108	0.204082	0.04	0.159091	0.102564	0.078947	0.28	0.157895	0.08	0.105263	0	0.139241	0.125	0.25641	0.357143	0.275862	0.205128	0.25	0.169811	0.282051	0.090909	0.275	0.526316	0.263158	0.425	0.3	0.325	0.160714	0.219512	0.148936	0.159091	0.255814	0.108108
0.090909	0.095238	0.04	0.028571	0.037037	0.217391	0.142857	0.032258	0.125	0	0.190476	0.035714	0.25	0.090909	0.043478	0.173913	0.129032	0.190476	0.162162	0.028571	0.129032	0.125	0.136364	0.170732	0.037037	0.085714	0.181818	0	0.057143	0.318182	0.269231	0.28125	0.137255	0.409091	0.147059	0.095238	0.214286	0.142857	0.206897	0.235294	0.230769	0.322581	0.195122	0.275862	0.166667	0.214286	0.055556	0.09375	0.266667	0.041667
0.116667	0.134328	0	0	0.029412	0.166667	0.148148	0.054054	0.096774	0.107143	0.142857	0	0.185185	0.033333	0.033333	0.0625	0.105263	0.142857	0.190476	0	0.105263	0.133333	0.032258	0.170213	0.060606	0.097561	0.222222	0	0.08	0.241379	0.290323	0.371429	0.226415	0.1875	0.314286	0.12766	0.413793	0.026316	0.354839	0.441176	0.344828	0.333333	0.191489	0.257143	0.142857	0.366667	0.153846	0.166667	0.25	0
0.188406	0.22973	0.043478	0.054545	0.020408	0.136364	0.095238	0.018868	0.113636	0	0.119048	0.02	0.119048	0.069767	0.045455	0.088889	0.163265	0.093023	0.226415	0.017544	0.14	0.088889	0.068182	0.296296	0.020408	0.071429	0.090909	0	0.103448	0.108696	0.222222	0.285714	0.230769	0.204545	0.297872	0.079365	0.191489	0.08	0.1875	0.185185	0.227273	0.3125	0.314815	0.552632	0.145161	0.217391	0.034483	0.096154	0.22449	0.044444
0.142857	0.15873	0	0	0.032258	0.230769	0.166667	0.058824	0.107143	0.037037	0.208333	0	0.26087	0.037037	0.037037	0.068966	0.114286	0.208333	0.205128	0	0.147059	0.148148	0.035714	0.238095	0.032258	0.076923	0.2	0	0.068493	0.222222	0.321429	0.40625	0.192308	0.206897	0.34375	0.06383	0.407407	0.028571	0.444444	0.352941	0.333333	0.363636	0.232558	0.242424	0.177778	0.357143	0.105263	0.114286	0.3125	0
0.115385	0.135593	0	0	0	0.181818	0.222222	0.034483	0.136364	0	0.210526	0	0.210526	0.047619	0.047619	0.086957	0.137931	0.210526	0.242424	0	0.178571	0.190476	0.045455	0.179487	0	0.028571	0.263158	0	0.014085	0.285714	0.291667	0.3	0.12	0.26087	0.321429	0.023256	0.333333	0.034483	0.222222	0.212121	0.25	0.258065	0.146341	0.206897	0.146341	0.28	0.028571	0.1	0.2	0
0.125	0.113402	0	0	0.116667	0	0	0.059701	0	0.05	0	0.014925	0	0.032787	0.032787	0.064516	0.104478	0	0.078947	0	0.104478	0	0.032258	0	0.046875	0.115942	0.015625	0.031746	0.313953	0.014925	0.028571	0.038961	0.276316	0.044776	0.026316	0.231884	0.013889	0.059701	0.013699	0.065789	0.059701	0.025641	0.011494	0.041096	0.073171	0.028169	0.222222	0.15625	0.026667	0
0.166667	0.142857	0.074074	0.083333	0.033333	0.24	0.173913	0.060606	0.111111	0	0.217391	0.032258	0.272727	0.125	0.08	0.111111	0.151515	0.217391	0.179487	0.083333	0.151515	0.111111	0.12	0.214286	0.068966	0.051282	0.208333	0.035714	0.054795	0.230769	0.384615	0.375	0.173077	0.36	0.354839	0.113636	0.275862	0.09375	0.461538	0.363636	0.296296	0.375	0.238095	0.290323	0.209302	0.423077	0.051282	0.085714	0.366667	0.076923
0.160714	0.15625	0.148148	0.171429	0.03125	0.32	0.16	0.193548	0.28	0.208333	0.153846	0.172414	0.25	0.208333	0.16	0.066667	0.176471	0.25	0.230769	0.171429	0.212121	0.28	0.25	0.292683	0.269231	0.228571	0.291667	0.107143	0.067568	0.307692	0.357143	0.314286	0.188679	0.333333	0.222222	0.108696	0.3	0.15625	0.333333	0.236842	0.275862	0.314286	0.285714	0.272727	0.173913	0.344828	0.102564	0.176471	0.264706	0.25
0.175439	0.206349	0.1	0.131579	0.060606	0.129032	0.107143	0.083333	0.172414	0	0.185185	0.058824	0.103448	0.107143	0.068966	0.096774	0.272727	0.142857	0.282051	0.102564	0.2	0.096774	0.103448	0.195652	0.09375	0.046512	0.137931	0.03125	0.038462	0.241379	0.212121	0.2	0.12069	0.1875	0.15	0.104167	0.138889	0.114286	0.135135	0.139535	0.181818	0.2	0.244444	0.294118	0.217391	0.205882	0.046512	0.166667	0.184211	0.142857
0.222222	0.229508	0.032258	0.05	0.0625	0.133333	0.153846	0.055556	0.137931	0	0.148148	0.129032	0.148148	0	0.034483	0.03125	0.242424	0.148148	0.25641	0.05	0.242424	0.1	0.033333	0.255814	0.0625	0	0.185185	0.032258	0.025641	0.166667	0.21875	0.27027	0.142857	0.15625	0.285714	0.061224	0.37931	0.055556	0.242424	0.333333	0.1875	0.27027	0.27907	0.228571	0.145833	0.212121	0	0.138889	0.222222	0.068966
0.126316	0.104762	0.013889	0.064103	0.086957	0.013514	0.028986	0.112676	0.013699	0.044118	0.028571	0.041096	0	0.028986	0.028986	0.072464	0.093333	0	0.111111	0.024691	0.108108	0.027778	0.028571	0.043956	0.056338	0.103896	0.013889	0.028169	0.344444	0.013333	0.025641	0.060241	0.206897	0.054054	0.04878	0.207792	0.038462	0.053333	0.037975	0.1125	0.025974	0.073171	0.043478	0.05	0.142857	0.025316	0.231884	0.138889	0.075949	0.028571
0.128571	0.1	0.022727	0.057692	0.093023	0.021739	0.02381	0.133333	0.022222	0.075	0.047619	0.043478	0	0.04878	0.04878	0.121951	0.102041	0	0.087719	0.018519	0.125	0.022222	0.047619	0.046875	0.068182	0.163265	0.022727	0.022727	0.24	0.090909	0.04	0.090909	0.166667	0.086957	0.074074	0.25	0.06	0.085106	0.058824	0.150943	0.040816	0.090909	0.046154	0.076923	0.152542	0.039216	0.357143	0.2	0.075472	0.023256
0.153846	0.105263	0.025	0.0625	0.131579	0.02381	0.026316	0.175	0.02439	0.083333	0.052632	0.047619	0	0.054054	0.054054	0.135135	0.136364	0	0.115385	0.02	0.162791	0.02439	0.052632	0.05	0.075	0.177778	0.025	0.051282	0.253521	0.023256	0.043478	0.098039	0.237288	0.095238	0.08	0.326087	0.042553	0.093023	0.06383	0.163265	0.044444	0.098039	0.04918	0.083333	0.142857	0.042553	0.358974	0.25	0.081633	0.025641
0.148148	0.126984	0.166667	0.117647	0.034483	0.5	0.181818	0.096774	0.318182	0.130435	0.227273	0.107143	0.421053	0.181818	0.181818	0.115385	0.15625	0.35	0.184211	0.085714	0.15625	0.26087	0.173913	0.282051	0.111111	0.111111	0.4	0.166667	0.013333	0.409091	0.590909	0.482759	0.153846	0.434783	0.322581	0.043478	0.636364	0.030303	0.761905	0.294118	0.36	0.482759	0.307692	0.21875	0.159091	0.565217	0.025641	0.088235	0.37931	0.125
0.037037	0.031746	0.294118	0.185185	0.043478	0.2	0	0.272727	0.210526	0.428571	0.05	0.25	0.166667	0.25	0.25	0	0.068966	0.166667	0.054054	0.185185	0.033333	0.15	0.235294	0.128205	0.411765	0.259259	0.157895	0.157895	0.076923	0.136364	0.115385	0.121212	0.058824	0.173913	0	0.166667	0.111111	0.076923	0.107143	0.1875	0	0.121212	0.125	0.064516	0.046512	0.111111	0.133333	0.107143	0.096774	0.4
0.192308	0.224138	0.076923	0.117647	0.153846	0.111111	0.238095	0.096774	0.16	0	0.173913	0.107143	0.08	0.083333	0.083333	0.035714	0.37037	0.125	0.451613	0.085714	0.48	0.208333	0.125	0.315789	0.071429	0	0.12	0.076923	0.055556	0.107143	0.166667	0.131579	0.153846	0.137931	0.171429	0.090909	0.2	0.096774	0.121212	0.189189	0.172414	0.162162	0.243902	0.258065	0.186047	0.16129	0.025641	0.275862	0.142857	0.125
0.070175	0.111111	0.038462	0.027778	0	0.16	0.136364	0.064516	0.166667	0.086957	0.181818	0	0.130435	0.041667	0.041667	0.037037	0.090909	0.130435	0.157895	0	0.090909	0.12	0.04	0.113636	0.035714	0.026316	0.173913	0	0.013514	0.153846	0.172414	0.235294	0.134615	0.142857	0.212121	0.021739	0.206897	0	0.125	0.162162	0.178571	0.166667	0.111111	0.151515	0.086957	0.129032	0.026316	0.125	0.114286	0.04
0.196078	0.206897	0.038462	0.027778	0.16	0.074074	0.315789	0.178571	0.076923	0.086957	0.083333	0.071429	0.083333	0	0.041667	0.037037	0.44	0.083333	0.257143	0.027778	0.5	0.272727	0.04	0.139535	0.115385	0.026316	0.125	0.08	0.102941	0.111111	0.133333	0.135135	0.204082	0.103448	0.142857	0.119048	0.206897	0.03125	0.090909	0.194444	0.178571	0.135135	0.086957	0.151515	0.111111	0.129032	0.114286	0.44	0.114286	0.04
0.123077	0.123288	0.054054	0.088889	0.205882	0.051282	0	0.184211	0.052632	0.088235	0	0.076923	0	0.088235	0.088235	0.111111	0.116279	0	0.12	0.065217	0.116279	0	0.117647	0.051724	0.138889	0.159091	0.026316	0.054054	0.26087	0.076923	0.069767	0.08	0.224138	0.128205	0.04	0.282609	0.021739	0.125	0.043478	0.1	0.071429	0.058824	0.068966	0.086957	0.148148	0.044444	0.378378	0.2	0.0625	0.085714
0.153846	0.135135	0.242424	0.378378	0.04878	0.34375	0.083333	0.205128	0.235294	0.21875	0.212121	0.189189	0.25	0.147059	0.147059	0.05	0.136364	0.212121	0.137255	0.243902	0.111111	0.135135	0.176471	0.369565	0.228571	0.12766	0.242424	0.205882	0.072289	0.222222	0.2	0.166667	0.106061	0.277778	0.148936	0.12963	0.166667	0.068182	0.282051	0.23913	0.093023	0.217391	0.361702	0.130435	0.207547	0.195122	0.06	0.136364	0.261905	0.25
0.145161	0.142857	0.027778	0.021739	0.083333	0.147059	0.129032	0.04878	0.117647	0.060606	0.16129	0.025641	0.125	0.029412	0.029412	0.055556	0.15	0.16129	0.2	0.021739	0.15	0.117647	0.058824	0.204082	0.083333	0.113636	0.15625	0	0.103896	0.212121	0.257143	0.333333	0.210526	0.166667	0.282051	0.14	0.323529	0.04878	0.277778	0.394737	0.30303	0.268293	0.2	0.263158	0.132075	0.323529	0.166667	0.179487	0.225	0.028571
0.125	0.107692	0.26087	0.258065	0.068966	0.55	0.125	0.166667	0.428571	0.125	0.217391	0.185185	0.333333	0.227273	0.227273	0.071429	0.151515	0.272727	0.179487	0.258065	0.117647	0.25	0.272727	0.342105	0.192308	0.078947	0.318182	0.16	0.013158	0.28	0.333333	0.294118	0.070175	0.416667	0.105263	0.065217	0.37037	0.129032	0.310345	0.25	0.166667	0.257143	0.333333	0.176471	0.238095	0.233333	0	0.085714	0.242424	0.272727
0.117647	0.157895	0	0	0	0.086957	0.3125	0.035714	0.2	0	0.157895	0	0.1	0.105263	0.05	0.090909	0.230769	0.157895	0.290323	0	0.28	0.263158	0.1	0.184211	0	0.060606	0.15	0	0.059701	0.181818	0.25	0.1875	0.145833	0.166667	0.241379	0.04878	0.192308	0.074074	0.185185	0.114286	0.26087	0.225806	0.179487	0.259259	0.179487	0.24	0.09375	0.142857	0.25	0
0.122449	0.084746	0.235294	0.148148	0.045455	0.533333	0.266667	0.125	0.466667	0.1875	0.333333	0.2	0.538462	0.266667	0.357143	0	0.2	0.538462	0.151515	0.107143	0.153846	0.375	0.25	0.228571	0.15	0.1	0.75	0.235294	0.014706	0.5	0.4	0.285714	0.12766	0.444444	0.172414	0.025	0.526316	0	0.304348	0.15625	0.227273	0.285714	0.222222	0.185185	0.128205	0.380952	0	0.111111	0.269231	0.25
0.127273	0.109375	0.076923	0.151515	0.034483	0.2	0.130435	0.096774	0.115385	0	0.227273	0.068966	0.227273	0.083333	0.04	0.074074	0.121212	0.173913	0.184211	0.055556	0.121212	0.115385	0.125	0.25	0.111111	0.052632	0.166667	0	0.041096	0.192308	0.206897	0.30303	0.090909	0.32	0.322581	0.090909	0.16129	0.133333	0.233333	0.294118	0.214286	0.30303	0.275	0.181818	0.186047	0.241379	0.052632	0.088235	0.333333	0.125
0.171875	0.135135	0.138889	0.243902	0.04878	0.30303	0.083333	0.205128	0.2	0.181818	0.176471	0.128205	0.25	0.147059	0.147059	0.076923	0.136364	0.212121	0.137255	0.133333	0.136364	0.135135	0.176471	0.26	0.228571	0.177778	0.242424	0.108108	0.126582	0.294118	0.230769	0.217391	0.177419	0.314286	0.173913	0.22	0.166667	0.093023	0.282051	0.23913	0.119048	0.272727	0.28	0.155556	0.185185	0.25641	0.177778	0.162791	0.232558	0.176471
0.155172	0.1875	0	0	0.029412	0.166667	0.148148	0.026316	0.096774	0.033333	0.142857	0	0.185185	0.033333	0.033333	0.0625	0.135135	0.142857	0.25	0	0.135135	0.133333	0.032258	0.222222	0.029412	0.071429	0.222222	0	0.038462	0.241379	0.290323	0.371429	0.203704	0.1875	0.352941	0.06	0.413793	0.026316	0.354839	0.324324	0.344828	0.411765	0.244444	0.294118	0.142857	0.366667	0.071429	0.105263	0.25	0
0.185185	0.196721	0.034483	0.025641	0.142857	0.066667	0.272727	0.16129	0.068966	0.076923	0.074074	0.064516	0.074074	0	0.037037	0.033333	0.392857	0.074074	0.236842	0.025641	0.444444	0.24	0.035714	0.130435	0.103448	0.02439	0.111111	0.071429	0.098592	0.1	0.121212	0.153846	0.192308	0.09375	0.131579	0.136364	0.225806	0.028571	0.083333	0.210526	0.16129	0.153846	0.081633	0.138889	0.104167	0.117647	0.105263	0.392857	0.105263	0.035714
0.157895	0.171875	0.066667	0.05	0.0625	0.214286	0.153846	0.085714	0.137931	0.071429	0.148148	0.060606	0.192308	0.111111	0.071429	0.137931	0.138889	0.148148	0.25641	0.076923	0.138889	0.1	0.107143	0.227273	0.133333	0.128205	0.230769	0.032258	0.09589	0.25	0.344828	0.342857	0.207547	0.275862	0.363636	0.155556	0.333333	0.117647	0.366667	0.333333	0.310345	0.342857	0.27907	0.30303	0.27907	0.428571	0.1	0.138889	0.294118	0.068966
0.152542	0.222222	0.096774	0.128205	0.028571	0.125	0.185185	0.111111	0.166667	0	0.137931	0.057143	0.064516	0.185185	0.142857	0.129032	0.228571	0.1	0.378378	0.073171	0.30303	0.166667	0.137931	0.272727	0.090909	0.045455	0.096774	0.0625	0.064935	0.15625	0.171429	0.195122	0.137931	0.147059	0.146341	0.102041	0.166667	0.111111	0.131579	0.162791	0.176471	0.195122	0.266667	0.323529	0.212766	0.166667	0.069767	0.162162	0.15	0.137931
0.0625	0.071429	0	0	0	0.1875	0.363636	0	0.125	0	0.230769	0	0.230769	0.071429	0.071429	0.058824	0.130435	0.230769	0.133333	0	0.130435	0.2	0.066667	0.083333	0	0.035714	0.214286	0	0.015625	0.25	0.2	0.142857	0.065217	0.157895	0.153846	0.027778	0.136364	0.095238	0.181818	0.1	0.210526	0.142857	0.111111	0.12	0.111111	0.190476	0.035714	0.130435	0.16	0
0.196078	0.147541	0	0.057143	0	0.208333	0.190476	0	0.12	0	0.444444	0.034483	0.238095	0.086957	0.041667	0.076923	0.16129	0.3	0.222222	0	0.16129	0.12	0.083333	0.25641	0	0.054054	0.173913	0	0.027397	0.2	0.416667	0.3125	0.156863	0.230769	0.37931	0.068182	0.296296	0.064516	0.565217	0.30303	0.32	0.4	0.282051	0.310345	0.136364	0.4	0.054054	0.090909	0.392857	0
0.153846	0.131148	0.04	0.090909	0.037037	0.272727	0.2	0.032258	0.173913	0	0.388889	0	0.25	0.142857	0.142857	0.08	0.129032	0.25	0.162162	0.028571	0.129032	0.125	0.136364	0.2	0	0.027027	0.3	0.04	0.013699	0.318182	0.375	0.205882	0.137255	0.24	0.344828	0.045455	0.259259	0.066667	0.4	0.235294	0.28	0.28125	0.225	0.233333	0.195122	0.307692	0.027027	0.09375	0.310345	0.041667
0.189655	0.181818	0.060606	0.071429	0.057143	0.193548	0.137931	0.051282	0.16129	0	0.133333	0.055556	0.133333	0.03125	0.03125	0.058824	0.157895	0.133333	0.238095	0.046512	0.157895	0.125	0.0625	0.266667	0.057143	0	0.166667	0.029412	0.024691	0.151515	0.272727	0.351351	0.196429	0.176471	0.263158	0.057692	0.433333	0.051282	0.257143	0.342105	0.322581	0.351351	0.26087	0.277778	0.137255	0.264706	0	0.1	0.27027	0.0625
0.132075	0.169492	0	0	0	0.217391	0.263158	0.032258	0.125	0	0.190476	0	0.25	0.043478	0.043478	0.038462	0.166667	0.190476	0.264706	0	0.206897	0.227273	0.041667	0.263158	0	0.027027	0.238095	0	0.027778	0.26087	0.269231	0.28125	0.16	0.24	0.258065	0.022222	0.307692	0.032258	0.296296	0.235294	0.333333	0.322581	0.195122	0.233333	0.166667	0.36	0.055556	0.09375	0.266667	0
0.092593	0.079365	0.041667	0.029412	0	0.125	0.15	0.033333	0.181818	0.15	0.2	0	0.090909	0.045455	0.045455	0	0.133333	0.142857	0.135135	0	0.096774	0.181818	0.043478	0.119048	0.08	0.088235	0.086957	0	0.089552	0.076923	0.142857	0.111111	0.14	0.111111	0.117647	0.097561	0.137931	0	0.133333	0.242424	0.148148	0.111111	0.142857	0.16129	0.043478	0.1	0.121212	0.133333	0.121212	0.043478
0.174603	0.136986	0.142857	0.25	0.05	0.3125	0.085714	0.210526	0.205882	0.1875	0.181818	0.131579	0.258065	0.151515	0.151515	0.078947	0.139535	0.21875	0.14	0.136364	0.139535	0.138889	0.181818	0.265306	0.235294	0.181818	0.25	0.111111	0.113924	0.30303	0.236842	0.222222	0.180328	0.323529	0.177778	0.2	0.170732	0.095238	0.289474	0.244444	0.121951	0.27907	0.285714	0.159091	0.188679	0.263158	0.155556	0.166667	0.238095	0.181818
0.297872	0.22807	0.08	0.088235	0.208333	0.115385	0.086957	0.137931	0.166667	0.041667	0.238095	0.071429	0.083333	0.041667	0.086957	0	0.636364	0.083333	0.189189	0.027778	0.565217	0.076923	0.083333	0.166667	0.074074	0	0.125	0.08	0.086957	0.071429	0.0625	0.076923	0.18	0.103448	0.142857	0.119048	0.09375	0.03125	0.125	0.162162	0.1	0.135135	0.162791	0.1875	0.06383	0.060606	0.083333	0.5	0.147059	0.083333
0.150943	0.147541	0.08	0.121212	0.035714	0.208333	0.190476	0.064516	0.166667	0	0.238095	0.034483	0.181818	0.086957	0.041667	0.076923	0.16129	0.181818	0.257143	0.057143	0.16129	0.166667	0.083333	0.225	0.074074	0.054054	0.227273	0	0.056338	0.25	0.619048	0.354839	0.204082	0.333333	0.333333	0.093023	0.296296	0.1	0.384615	0.34375	0.375	0.448276	0.25	0.357143	0.219512	0.346154	0.054054	0.125	0.392857	0.083333
0.121212	0.121622	0.052632	0.06383	0.166667	0.02439	0	0.179487	0.025	0.085714	0	0.075	0	0.055556	0.055556	0.108108	0.113636	0	0.096154	0.06383	0.113636	0	0.083333	0.050847	0.135135	0.181818	0.025641	0.025641	0.275362	0.075	0.044444	0.078431	0.220339	0.097561	0.039216	0.333333	0.021277	0.121951	0.020833	0.098039	0.069767	0.057692	0.067797	0.085106	0.145455	0.043478	0.368421	0.195122	0.061224	0.083333
0.078125	0.083333	0	0	0.088235	0.15625	0.1	0.051282	0.090909	0.03125	0.133333	0	0.172414	0.064516	0.03125	0.125	0.1	0.133333	0.130435	0	0.1	0.058824	0.0625	0.075472	0.027778	0.146341	0.206897	0	0.092105	0.266667	0.2	0.190476	0.135593	0.212121	0.170732	0.122449	0.131579	0.108108	0.157895	0.085106	0.138889	0.162791	0.09434	0.179487	0.26087	0.228571	0.093023	0.128205	0.175	0
0.16129	0.157143	0.085714	0.090909	0.025641	0.25	0.125	0.073171	0.21875	0.090909	0.121212	0.108108	0.233333	0.090909	0.125	0	0.146341	0.233333	0.195652	0.066667	0.146341	0.21875	0.088235	0.304348	0.081081	0.06383	0.310345	0.117647	0.011765	0.242424	0.323529	0.432432	0.147541	0.264706	0.457143	0.017544	0.4375	0	0.342857	0.255814	0.257143	0.394737	0.297872	0.225	0.089286	0.352941	0	0.093023	0.315789	0.088235
0.177419	0.15493	0.054054	0.042553	0.051282	0.171429	0.121212	0.097561	0.081081	0.027778	0.151515	0.02439	0.1875	0	0	0	0.142857	0.151515	0.166667	0.042553	0.142857	0.111111	0.027027	0.22	0.078947	0	0.147059	0	0.074074	0.135135	0.210526	0.285714	0.126984	0.157895	0.3	0.035088	0.205128	0.022727	0.297297	0.309524	0.216216	0.255814	0.192308	0.162791	0.192308	0.236842	0.040816	0.090909	0.214286	0.055556
0.122807	0.140625	0.071429	0.111111	0.032258	0.185185	0.166667	0.090909	0.148148	0	0.16	0.064516	0.16	0.076923	0.037037	0.107143	0.147059	0.16	0.236842	0.111111	0.181818	0.148148	0.074074	0.209302	0.103448	0.076923	0.2	0	0.054054	0.222222	0.321429	0.323529	0.169811	0.346154	0.30303	0.111111	0.225806	0.125	0.21875	0.210526	0.241379	0.285714	0.232558	0.322581	0.261905	0.266667	0.05	0.114286	0.272727	0.115385
0.169811	0.109375	0.166667	0.1875	0.034483	0.428571	0.181818	0.133333	0.318182	0.130435	0.285714	0.107143	0.35	0.181818	0.181818	0.074074	0.121212	0.35	0.153846	0.085714	0.121212	0.26087	0.173913	0.315789	0.111111	0.111111	0.333333	0.166667	0.013333	0.347826	0.590909	0.433333	0.153846	0.5	0.322581	0.043478	0.44	0.030303	0.761905	0.294118	0.36	0.482759	0.342105	0.21875	0.133333	0.5	0.025641	0.057143	0.538462	0.125
0.137931	0.171875	0	0	0	0.172414	0.2	0.027027	0.1	0.071429	0.148148	0	0.192308	0.071429	0.034483	0.064516	0.138889	0.148148	0.25641	0	0.171429	0.137931	0.068966	0.2	0.0625	0.1	0.230769	0	0.081081	0.25	0.3	0.236842	0.207547	0.193548	0.323529	0.130435	0.290323	0.055556	0.28125	0.333333	0.266667	0.27027	0.222222	0.30303	0.170213	0.37931	0.157895	0.138889	0.222222	0
0.172414	0.203125	0.030303	0.023256	0.028571	0.125	0.185185	0.025641	0.129032	0	0.137931	0.027778	0.137931	0.066667	0.032258	0.129032	0.162162	0.137931	0.275	0.023256	0.162162	0.129032	0.064516	0.272727	0.028571	0.095238	0.172414	0	0.093333	0.193548	0.366667	0.361111	0.245283	0.258065	0.342857	0.102041	0.272727	0.111111	0.228571	0.219512	0.333333	0.4	0.295455	0.451613	0.212766	0.3125	0.045455	0.102564	0.277778	0.03125
0.184615	0.162162	0.131579	0.232558	0.046512	0.285714	0.108108	0.166667	0.189189	0.171429	0.166667	0.121951	0.235294	0.138889	0.138889	0.1	0.130435	0.2	0.176471	0.12766	0.130435	0.157895	0.166667	0.326531	0.153846	0.145833	0.228571	0.102564	0.083333	0.277778	0.315789	0.380952	0.153846	0.297297	0.333333	0.145455	0.342105	0.088889	0.405405	0.311111	0.225	0.414634	0.346939	0.2	0.222222	0.378378	0.1	0.130435	0.309524	0.166667
0.2	0.153846	0.185185	0.105263	0.030303	0.36	0.153846	0.151515	0.222222	0.111111	0.192308	0.129032	0.347826	0.111111	0.111111	0	0.171429	0.291667	0.195122	0.105263	0.171429	0.222222	0.148148	0.35	0.172414	0.073171	0.333333	0.103448	0.025641	0.296296	0.392857	0.382353	0.142857	0.321429	0.323529	0.04	0.37931	0.027027	0.518519	0.333333	0.310345	0.424242	0.341463	0.228571	0.145833	0.481481	0	0.138889	0.333333	0.192308
0.105263	0.107692	0.208333	0.181818	0.033333	0.347826	0.125	0.166667	0.25	0.125	0.166667	0.185185	0.4	0.227273	0.173913	0.071429	0.117647	0.333333	0.179487	0.21875	0.117647	0.25	0.272727	0.275	0.192308	0.138889	0.318182	0.115385	0.040541	0.333333	0.333333	0.375	0.109091	0.478261	0.2	0.088889	0.233333	0.166667	0.310345	0.216216	0.206897	0.333333	0.3	0.212121	0.181818	0.321429	0.051282	0.085714	0.28125	0.272727
0.115385	0.080645	0	0	0	0.238095	0.157895	0	0.136364	0	0.277778	0	0.277778	0.1	0.047619	0.190476	0.064516	0.277778	0.138889	0.030303	0.064516	0.086957	0.095238	0.095238	0	0.090909	0.2	0	0.043478	0.35	0.24	0.21875	0.142857	0.318182	0.15625	0.073171	0.185185	0.111111	0.222222	0.142857	0.2	0.21875	0.146341	0.25	0.175	0.230769	0.058824	0.064516	0.2	0
0.22	0.166667	0.08	0.057143	0.035714	0.26087	0.190476	0.03125	0.166667	0	0.238095	0.034483	0.238095	0.086957	0.086957	0.076923	0.241379	0.181818	0.257143	0.027778	0.2	0.12	0.130435	0.324324	0.035714	0.026316	0.173913	0	0.013514	0.2	0.259259	0.272727	0.156863	0.28	0.290323	0.021739	0.296296	0.064516	0.285714	0.30303	0.32	0.354839	0.388889	0.407407	0.111111	0.296296	0.026316	0.125	0.3	0.083333
0.142857	0.177419	0.071429	0.052632	0.066667	0.230769	0.166667	0.058824	0.148148	0	0.16	0.03125	0.208333	0.12	0.076923	0.148148	0.147059	0.16	0.27027	0.052632	0.147059	0.107143	0.115385	0.238095	0.032258	0.076923	0.25	0.034483	0.054054	0.269231	0.37037	0.363636	0.215686	0.296296	0.433333	0.111111	0.357143	0.125	0.392857	0.277778	0.333333	0.363636	0.261905	0.322581	0.261905	0.461538	0.05	0.114286	0.3125	0.035714
0.019231	0.050847	0.357143	0.26087	0.05	0.3125	0	0.136364	0.333333	0.214286	0.058824	0.222222	0.2	0.7	0.545455	0.176471	0.037037	0.2	0.090909	0.115385	0	0.176471	0.636364	0.108108	0.166667	0.192308	0.1875	0.266667	0.030769	0.222222	0.238095	0.172414	0.040816	0.333333	0.032258	0.083333	0.125	0.086957	0.166667	0	0.041667	0.172414	0.135135	0.111111	0.076923	0.227273	0.068966	0	0.148148	0.285714
0.185185	0.196721	0.071429	0.142857	0.032258	0.066667	0.217391	0.16129	0.107143	0	0.16	0.064516	0.074074	0.076923	0.037037	0.107143	0.21875	0.115385	0.305556	0.081081	0.258065	0.192308	0.074074	0.268293	0.142857	0.076923	0.111111	0	0.083333	0.137931	0.193548	0.184211	0.148148	0.206897	0.228571	0.136364	0.151515	0.125	0.181818	0.243243	0.2	0.25	0.261905	0.28125	0.261905	0.1875	0.076923	0.181818	0.235294	0.16
0.183333	0.19403	0.057143	0.093023	0.054054	0.147059	0.129032	0.102564	0.085714	0.060606	0.125	0.081081	0.16129	0	0.029412	0.027027	0.15	0.125	0.255814	0.093023	0.15	0.117647	0.028571	0.229167	0.147059	0.042553	0.193548	0.027778	0.075949	0.176471	0.222222	0.3	0.210526	0.135135	0.315789	0.163265	0.363636	0.075	0.277778	0.558824	0.264706	0.333333	0.22449	0.2	0.22449	0.285714	0.088889	0.179487	0.25641	0.125
0.134615	0.079365	0.136364	0.09375	0.038462	0.421053	0.15	0.068966	0.238095	0	0.333333	0.037037	0.333333	0.045455	0.045455	0	0.172414	0.263158	0.105263	0.060606	0.133333	0.083333	0.090909	0.175	0.08	0	0.25	0	0.013889	0.217391	0.142857	0.25	0.075472	0.25	0.266667	0.046512	0.137931	0.033333	0.214286	0.171429	0.148148	0.176471	0.170732	0.2	0.142857	0.222222	0	0.096774	0.193548	0.142857
0.196429	0.169231	0.064516	0.04878	0.060606	0.206897	0.148148	0.147059	0.096774	0.033333	0.185185	0.058824	0.230769	0.033333	0.033333	0.030303	0.166667	0.185185	0.190476	0.04878	0.166667	0.133333	0.066667	0.222222	0.129032	0.022727	0.178571	0	0.094595	0.2	0.290323	0.297297	0.140351	0.225806	0.314286	0.06	0.242424	0.083333	0.4	0.361111	0.258065	0.297297	0.217391	0.189189	0.244444	0.322581	0.071429	0.105263	0.285714	0.103448
0.166667	0.125	0	0	0.068966	0.24	0.173913	0.060606	0.111111	0.038462	0.217391	0.032258	0.272727	0	0.038462	0	0.151515	0.217391	0.15	0	0.151515	0.153846	0	0.186047	0	0.051282	0.26087	0.035714	0.054795	0.185185	0.285714	0.294118	0.12963	0.172414	0.354839	0.042553	0.321429	0	0.407407	0.323529	0.25	0.257143	0.155556	0.142857	0.181818	0.321429	0.078947	0.151515	0.242424	0
0.148148	0.183333	0.076923	0.117647	0.111111	0.25	0.181818	0.0625	0.16	0	0.173913	0.107143	0.173913	0.130435	0.083333	0.16	0.233333	0.173913	0.285714	0.055556	0.275862	0.16	0.125	0.219512	0.071429	0.052632	0.217391	0.076923	0.070423	0.24	0.346154	0.264706	0.2	0.32	0.28125	0.116279	0.285714	0.133333	0.275862	0.257143	0.259259	0.264706	0.186047	0.344828	0.275	0.333333	0.052632	0.15625	0.25	0.08
0.035088	0.030303	0.086957	0.060606	0.08	0.08	0	0.068966	0.083333	0	0	0.076923	0	0.045455	0.045455	0.04	0.030303	0	0.05	0.060606	0.030303	0	0.090909	0.044444	0.08	0	0	0.041667	0.057971	0	0.066667	0.025641	0.055556	0.071429	0	0.046512	0	0.068966	0.030303	0.051282	0.033333	0.052632	0.043478	0.090909	0.066667	0	0	0.030303	0.121212	0.090909
0.090909	0.061538	0	0	0.037037	0	0	0.142857	0	0.142857	0	0	0	0	0	0	0.129032	0	0	0	0.129032	0	0	0	0.076923	0.055556	0	0	0.121212	0	0.03125	0	0.137255	0	0	0.095238	0	0	0	0.05	0.066667	0.025	0	0.057143	0	0	0.151515	0.166667	0.055556	0
0.111111	0.078125	0.04	0.028571	0	0.166667	0.142857	0	0.173913	0	0.190476	0	0.136364	0.043478	0.043478	0.038462	0.129032	0.136364	0.102564	0	0.09375	0.173913	0.041667	0.116279	0	0	0.181818	0	0	0.16	0.178571	0.205882	0.115385	0.148148	0.181818	0	0.214286	0	0.129032	0.166667	0.185185	0.171429	0.139535	0.275862	0.088889	0.172414	0	0.09375	0.117647	0.041667
0.109091	0.147541	0.038462	0.027778	0	0.16	0.136364	0.03125	0.217391	0	0.238095	0	0.130435	0.041667	0.041667	0.037037	0.16129	0.181818	0.222222	0	0.16129	0.12	0.04	0.166667	0	0	0.173913	0	0	0.153846	0.214286	0.272727	0.134615	0.142857	0.290323	0	0.25	0	0.16129	0.162162	0.222222	0.2	0.162791	0.225806	0.086957	0.166667	0	0.125	0.147059	0.04
0.215385	0.205479	0.071429	0.057692	0.093023	0.175	0.102564	0.108696	0.095238	0.075	0.128205	0.066667	0.157895	0.075	0.075	0.069767	0.173913	0.128205	0.24	0.037736	0.173913	0.069767	0.073171	0.196429	0.146341	0.096154	0.153846	0.071429	0.120482	0.142857	0.238095	0.276596	0.262295	0.219512	0.288889	0.226415	0.232558	0.085106	0.285714	0.487805	0.214286	0.276596	0.214286	0.244444	0.214286	0.261905	0.117647	0.173913	0.23913	0.073171
0.115385	0.175439	0	0	0	0.083333	0.294118	0.034483	0.136364	0	0.15	0	0.095238	0.1	0.047619	0.136364	0.222222	0.15	0.28125	0	0.269231	0.25	0.095238	0.179487	0	0.090909	0.142857	0	0.074627	0.173913	0.24	0.181818	0.166667	0.208333	0.233333	0.073171	0.185185	0.111111	0.178571	0.111111	0.25	0.21875	0.175	0.296296	0.205128	0.230769	0.090909	0.178571	0.241379	0
0.240741	0.1875	0.03125	0.075	0.029412	0.166667	0.148148	0.026316	0.133333	0	0.230769	0.028571	0.185185	0.068966	0.033333	0.0625	0.2	0.185185	0.282051	0.04878	0.2	0.133333	0.103448	0.27907	0.029412	0.046512	0.178571	0	0.025316	0.2	0.290323	0.297297	0.203704	0.1875	0.352941	0.039216	0.28125	0.114286	0.4	0.289474	0.344828	0.371429	0.302326	0.375	0.142857	0.322581	0.046512	0.135135	0.323529	0.032258
0.188679	0.142857	0.035714	0.054054	0	0.24	0.173913	0.060606	0.153846	0.038462	0.333333	0	0.217391	0.038462	0.038462	0	0.151515	0.166667	0.179487	0	0.151515	0.153846	0.037037	0.275	0.033333	0.025	0.26087	0	0.054795	0.230769	0.241379	0.257143	0.150943	0.133333	0.448276	0.020833	0.37037	0	0.357143	0.323529	0.296296	0.333333	0.238095	0.25	0.181818	0.423077	0.051282	0.117647	0.28125	0.037037
0.039216	0.033333	0.583333	0.26087	0.105263	0.3125	0	0.25	0.333333	0.214286	0.058824	0.222222	0.2	0.307692	0.307692	0.052632	0.076923	0.2	0.058824	0.16	0.037037	0.176471	0.384615	0.171429	0.3125	0.148148	0.1875	0.266667	0.030769	0.157895	0.130435	0.172414	0	0.263158	0	0.114286	0.125	0.041667	0.12	0.060606	0	0.133333	0.166667	0.071429	0.076923	0.125	0	0.037037	0.107143	0.5
0.173077	0.09375	0.08	0.088235	0.074074	0.318182	0.136364	0.064516	0.166667	0	0.3	0.071429	0.3	0.086957	0.086957	0.037037	0.16129	0.238095	0.128205	0.057143	0.125	0.076923	0.130435	0.195122	0.074074	0	0.227273	0.038462	0.013514	0.363636	0.172414	0.166667	0.072727	0.230769	0.142857	0.044444	0.129032	0.064516	0.2	0.194444	0.137931	0.166667	0.219512	0.1875	0.162791	0.166667	0	0.090909	0.181818	0.130435
0.118644	0.119403	0.066667	0.05	0.0625	0.0625	0	0.151515	0.064516	0.071429	0.033333	0.029412	0	0.111111	0.071429	0.137931	0.171429	0	0.065217	0.02439	0.138889	0	0.107143	0.038462	0.096774	0.157895	0	0	0.142857	0.029412	0.054054	0.093023	0.230769	0.121212	0.071429	0.181818	0	0.117647	0.025	0.066667	0.055556	0.068182	0.057692	0.131579	0.1	0.052632	0.157895	0.138889	0.073171	0.068966
0.137255	0.116667	0.090909	0.0625	0.04	0.3	0.222222	0.034483	0.190476	0	0.277778	0.038462	0.277778	0.047619	0.047619	0	0.222222	0.210526	0.171429	0.030303	0.178571	0.136364	0.095238	0.210526	0.04	0	0.333333	0	0.028571	0.285714	0.192308	0.21875	0.098039	0.208333	0.321429	0.023256	0.230769	0.034483	0.222222	0.142857	0.25	0.21875	0.205128	0.25	0.175	0.230769	0	0.137931	0.2	0.095238
0	0.016949	0.0625	0.038462	0.055556	0.055556	0	0	0.058824	0	0	0.052632	0	0.071429	0.071429	0.125	0	0	0.030303	0	0	0	0.066667	0.026316	0	0	0	0.0625	0	0	0.043478	0.032258	0	0.047619	0	0.027778	0.086957	0	0.04	0.064516	0	0.032258	0.025641	0	0.025641	0	0	0	0	0
0	0.032787	0.052632	0.071429	0.047619	0.047619	0	0	0.05	0	0	0.045455	0	0.058824	0.058824	0.166667	0	0	0.057143	0	0	0	0.055556	0.02439	0	0	0	0.052632	0.014925	0	0.08	0.029412	0.019608	0.086957	0	0.052632	0.076923	0	0.035714	0.058824	0.04	0.060606	0.02381	0.033333	0.04878	0	0	0	0	0
0	0.033898	0.058824	0.037037	0.052632	0.052632	0	0	0.055556	0	0	0.05	0	0.142857	0.142857	0.1875	0	0	0.060606	0	0	0	0.133333	0.025641	0	0.034483	0	0.058824	0.03125	0.05	0.136364	0.064516	0.041667	0.095238	0.033333	0.055556	0.083333	0.043478	0.038462	0.0625	0.090909	0.1	0.051282	0.074074	0.051282	0.04	0.034483	0	0.034483	0
0	0.032787	0.052632	0.071429	0.047619	0.047619	0	0	0.05	0	0	0.045455	0	0.058824	0.058824	0.166667	0	0	0.057143	0	0	0	0.055556	0.02439	0	0	0	0.052632	0.014925	0	0.038462	0.029412	0.019608	0.086957	0	0.052632	0.076923	0	0.035714	0.058824	0.04	0.060606	0.02381	0.033333	0.04878	0	0	0	0	0
0	0.032787	0.052632	0.071429	0.047619	0.047619	0	0	0.05	0	0	0.045455	0	0.058824	0.058824	0.166667	0	0	0.057143	0	0	0	0.055556	0.02439	0	0	0	0.052632	0.014925	0	0.038462	0.029412	0.019608	0.086957	0	0.052632	0.076923	0	0.035714	0.058824	0.04	0.060606	0.02381	0.033333	0.04878	0	0	0	0	0
0.018182	0.031746	0.1	0.066667	0.043478	0.043478	0	0.037037	0.045455	0	0	0.041667	0	0.052632	0.052632	0.095238	0.033333	0	0.054054	0.032258	0.033333	0	0.105263	0.047619	0.043478	0	0	0.047619	0.014493	0	0.035714	0.057143	0.018868	0.08	0	0.05	0.071429	0.037037	0.033333	0.085714	0.037037	0.057143	0.046512	0.03125	0.046512	0	0	0.033333	0.030303	0.05
0.096154	0.118644	0.045455	0.064516	0.086957	0.25	0.235294	0	0.2	0	0.222222	0.04	0.222222	0.166667	0.166667	0.333333	0.142857	0.222222	0.212121	0	0.142857	0.142857	0.157895	0.125	0	0.129032	0.352941	0.095238	0.075758	0.3	0.304348	0.1875	0.195652	0.4	0.241379	0.131579	0.192308	0.16	0.28	0.147059	0.26087	0.225806	0.15	0.307692	0.277778	0.291667	0.060606	0.103448	0.206897	0
0.155172	0.1875	0	0	0.029412	0.166667	0.148148	0.026316	0.096774	0.033333	0.142857	0	0.185185	0.033333	0.033333	0.0625	0.135135	0.142857	0.25	0	0.135135	0.133333	0.032258	0.222222	0.029412	0.071429	0.222222	0	0.038462	0.241379	0.290323	0.371429	0.203704	0.1875	0.352941	0.06	0.413793	0.026316	0.354839	0.324324	0.344828	0.411765	0.244444	0.294118	0.142857	0.366667	0.071429	0.105263	0.25	0
0.164179	0.191781	0.073171	0.058824	0.045455	0.15	0.166667	0.136364	0.097561	0.076923	0.102564	0.044444	0.131579	0.02439	0.02439	0.046512	0.12766	0.102564	0.244898	0.038462	0.152174	0.125	0.04878	0.294118	0.15	0.037037	0.157895	0.023256	0.069767	0.146341	0.214286	0.282609	0.169231	0.166667	0.23913	0.142857	0.3	0.041667	0.232558	0.578947	0.219512	0.340909	0.240741	0.170213	0.196429	0.238095	0.098039	0.152174	0.244444	0.075
0.078431	0.103448	0.105263	0.068966	0.045455	0.15	0.461538	0.125	0.157895	0	0.111111	0.043478	0.111111	0.055556	0.055556	0.047619	0.111111	0.111111	0.1875	0.068966	0.2	0.466667	0.111111	0.162162	0.095238	0.03125	0.105263	0	0.045455	0.142857	0.217391	0.16129	0.104167	0.238095	0.133333	0.051282	0.16	0.125	0.2	0.15625	0.227273	0.16129	0.128205	0.230769	0.128205	0.16	0.064516	0.111111	0.178571	0.111111
0.163636	0.140625	0	0	0.032258	0.185185	0.166667	0.058824	0.107143	0.12	0.208333	0	0.208333	0.037037	0.037037	0.033333	0.181818	0.208333	0.205128	0	0.181818	0.107143	0.035714	0.181818	0.066667	0.076923	0.25	0	0.098592	0.269231	0.275862	0.25	0.215686	0.166667	0.387097	0.136364	0.310345	0.028571	0.344828	0.314286	0.333333	0.25	0.204545	0.28125	0.152174	0.461538	0.166667	0.21875	0.235294	0
0.1	0.066667	0.105263	0.068966	0.045455	0.4375	0.1875	0.08	0.294118	0.117647	0.25	0.142857	0.538462	0.117647	0.1875	0	0.153846	0.428571	0.117647	0.068966	0.153846	0.222222	0.111111	0.162162	0.095238	0.064516	0.75	0.166667	0.029851	0.5	0.272727	0.2	0.104167	0.3	0.214286	0.025	0.380952	0	0.304348	0.15625	0.173913	0.2	0.157895	0.142857	0.157895	0.380952	0	0.111111	0.32	0.111111
0.147541	0.179104	0.028571	0.022222	0	0.1875	0.133333	0	0.121212	0	0.166667	0.026316	0.166667	0.0625	0.0625	0.057143	0.125	0.129032	0.204545	0	0.097561	0.121212	0.060606	0.26087	0	0.021277	0.16129	0	0.012048	0.181818	0.264706	0.416667	0.172414	0.205882	0.324324	0.037037	0.333333	0.02439	0.285714	0.3	0.3125	0.378378	0.282609	0.27027	0.113208	0.294118	0.021277	0.071429	0.297297	0.029412
0.137931	0.119403	0	0	0.172414	0.214286	0.153846	0.027027	0.1	0.034483	0.192308	0	0.24	0.034483	0.034483	0.03125	0.108108	0.192308	0.139535	0	0.108108	0.1	0.033333	0.173913	0.030303	0.1	0.185185	0	0.066667	0.206897	0.3	0.424242	0.230769	0.233333	0.363636	0.083333	0.290323	0.027027	0.366667	0.333333	0.357143	0.305556	0.195652	0.194444	0.145833	0.333333	0.128205	0.078947	0.294118	0
0.117647	0.1	0.045455	0.137931	0.041667	0.25	0.166667	0.035714	0.142857	0	0.294118	0.04	0.294118	0.105263	0.05	0.090909	0.142857	0.222222	0.176471	0.03125	0.142857	0.142857	0.157895	0.25	0.041667	0.060606	0.210526	0	0.044118	0.238095	0.304348	0.266667	0.145833	0.4	0.285714	0.04878	0.192308	0.115385	0.28	0.3	0.26087	0.310345	0.243243	0.259259	0.15	0.291667	0.060606	0.103448	0.346154	0.047619
0.109091	0.111111	0.08	0.057143	0.035714	0.26087	0.190476	0.178571	0.166667	0.136364	0.238095	0.034483	0.238095	0.086957	0.086957	0.037037	0.16129	0.181818	0.189189	0.027778	0.16129	0.166667	0.130435	0.195122	0.115385	0.114286	0.173913	0	0.102941	0.2	0.214286	0.2	0.113208	0.28	0.142857	0.093023	0.166667	0.064516	0.2	0.264706	0.222222	0.2	0.162791	0.1875	0.190476	0.166667	0.147059	0.16129	0.21875	0.083333
0.207547	0.15873	0.034483	0.052632	0.103448	0.185185	0.166667	0.058824	0.107143	0	0.16	0.1	0.208333	0.076923	0.076923	0.068966	0.21875	0.16	0.205128	0.052632	0.21875	0.107143	0.115385	0.238095	0.066667	0.076923	0.2	0.071429	0.068493	0.178571	0.37037	0.40625	0.215686	0.296296	0.30303	0.086957	0.357143	0.125	0.344828	0.4375	0.285714	0.40625	0.261905	0.28125	0.152174	0.310345	0.05	0.147059	0.354839	0.074074
0.038462	0.032787	0.111111	0.071429	0	0.1	0	0.083333	0.105263	0.125	0	0.095238	0.117647	0.125	0.125	0.105263	0	0.117647	0	0.071429	0	0.105263	0.117647	0.05	0.1	0.066667	0.111111	0.111111	0.014925	0.095238	0.08	0.060606	0	0.086957	0	0	0.076923	0	0.074074	0	0	0.060606	0.04878	0	0	0.076923	0	0	0.230769	0.117647
0.06	0.107143	0	0	0	0.105263	0.7	0.041667	0.176471	0	0.125	0	0.125	0	0	0.052632	0.12	0.125	0.2	0	0.217391	0.428571	0	0.138889	0	0	0.1875	0	0.030769	0.157895	0.181818	0.133333	0.085106	0.142857	0.142857	0	0.227273	0	0.12	0.129032	0.190476	0.133333	0.076923	0.153846	0.105263	0.173913	0.033333	0.076923	0.107143	0
0.130435	0.12987	0.047619	0.173913	0.069767	0.15	0.105263	0.162791	0.097561	0.076923	0.131579	0.044444	0.131579	0.05	0.02439	0.071429	0.12766	0.102564	0.150943	0.058824	0.152174	0.097561	0.075	0.222222	0.121951	0.142857	0.1	0	0.15	0.119048	0.159091	0.255319	0.169231	0.25641	0.212766	0.207547	0.106383	0.111111	0.152174	0.276596	0.136364	0.204082	0.218182	0.170213	0.218182	0.155556	0.217391	0.152174	0.191489	0.075
0.166667	0.178082	0.194444	0.204545	0.046512	0.25	0.108108	0.225	0.189189	0.108108	0.105263	0.179487	0.2	0.108108	0.108108	0.023256	0.155556	0.2	0.2	0.232558	0.155556	0.157895	0.135135	0.354167	0.153846	0.1	0.228571	0.162162	0.109756	0.243243	0.351351	0.318182	0.153846	0.297297	0.272727	0.105263	0.307692	0.065217	0.333333	0.255319	0.225	0.318182	0.346939	0.227273	0.245283	0.342105	0.078431	0.130435	0.27907	0.166667
0.169231	0.164384	0.135135	0.181818	0.047619	0.294118	0.111111	0.230769	0.194444	0.142857	0.138889	0.125	0.242424	0.111111	0.111111	0.075	0.133333	0.205882	0.204082	0.155556	0.159091	0.162162	0.138889	0.333333	0.222222	0.125	0.235294	0.105263	0.084337	0.285714	0.289474	0.390244	0.15625	0.305556	0.27907	0.127273	0.351351	0.090909	0.378378	0.318182	0.230769	0.390244	0.3	0.177778	0.226415	0.388889	0.102041	0.133333	0.285714	0.171429
0.128571	0.1	0.184211	0.27907	0.044444	0.27027	0.075	0.159091	0.179487	0.194444	0.157895	0.230769	0.222222	0.131579	0.131579	0.069767	0.102041	0.189189	0.127273	0.27907	0.102041	0.121951	0.157895	0.288462	0.205128	0.212766	0.216216	0.153846	0.094118	0.263158	0.209302	0.22449	0.132353	0.282051	0.16	0.181818	0.152174	0.085106	0.255814	0.196078	0.108696	0.25	0.307692	0.142857	0.192982	0.232558	0.096154	0.125	0.212766	0.157895
0.166667	0.148148	0.086957	0.153846	0.04	0.209302	0.066667	0.166667	0.133333	0.116279	0.139535	0.081633	0.166667	0.116279	0.090909	0.133333	0.113208	0.139535	0.135593	0.132075	0.113208	0.085106	0.113636	0.2	0.155556	0.148148	0.162791	0.06383	0.152941	0.204545	0.163265	0.160714	0.188406	0.25	0.145455	0.25	0.115385	0.098039	0.204082	0.245283	0.098039	0.203704	0.216667	0.150943	0.216667	0.183673	0.148148	0.134615	0.24	0.139535
0.173913	0.184211	0.119048	0.212766	0.042553	0.25641	0.097561	0.152174	0.170732	0.153846	0.15	0.111111	0.210526	0.125	0.125	0.116279	0.12	0.179487	0.207547	0.117647	0.12	0.142857	0.15	0.277778	0.139535	0.18	0.205128	0.093023	0.130952	0.25	0.317073	0.319149	0.215385	0.3	0.25	0.175439	0.27907	0.104167	0.365854	0.285714	0.232558	0.409091	0.320755	0.288889	0.206897	0.309524	0.092593	0.142857	0.282609	0.15
0.119403	0.12	0.171429	0.275	0.04878	0.131579	0	0.205128	0.135135	0.181818	0.052632	0.128205	0.081081	0.181818	0.181818	0.105263	0.086957	0.081081	0.09434	0.133333	0.06383	0.076923	0.212121	0.166667	0.228571	0.261905	0.078947	0.108108	0.186667	0.157895	0.116279	0.098039	0.123077	0.179487	0.058824	0.270833	0.065217	0.146341	0.136364	0.14	0.021739	0.142857	0.185185	0.106383	0.163636	0.139535	0.177778	0.111111	0.12766	0.176471
0.183673	0.155172	0.090909	0.096774	0.3	0.04	0	0.25	0.041667	0.1	0	0.125	0	0	0.047619	0	0.32	0	0.171429	0.096774	0.32	0	0.045455	0.069767	0.238095	0.028571	0.043478	0.090909	0.125	0	0	0.026316	0.142857	0.035714	0.027778	0.222222	0.032258	0.071429	0	0.142857	0	0.026316	0.068182	0.029412	0.068182	0	0.125	0.32	0.028571	0.15
0.117647	0.081967	0	0	0.086957	0	0	0.16	0	0.166667	0	0.04	0	0	0.05	0	0.185185	0	0.025641	0	0.185185	0	0	0	0.086957	0.060606	0.045455	0.045455	0.126984	0	0.034483	0	0.145833	0	0.028571	0.131579	0.033333	0	0	0.083333	0.074074	0.027027	0	0.030303	0	0	0.166667	0.230769	0.029412	0
0.163934	0.15942	0.057143	0.044444	0.026316	0.258065	0.129032	0.075	0.151515	0.060606	0.2	0.025641	0.2	0.029412	0.029412	0.027027	0.179487	0.16129	0.148936	0.021739	0.15	0.117647	0.058824	0.18	0.054054	0	0.15625	0	0.024096	0.142857	0.189189	0.3	0.169492	0.166667	0.315789	0.036364	0.285714	0.02381	0.277778	0.232558	0.228571	0.268293	0.176471	0.230769	0.090909	0.25	0.020833	0.121951	0.195122	0.058824
0.186441	0.19697	0.058824	0.069767	0.027027	0.266667	0.133333	0.076923	0.15625	0	0.206897	0.054054	0.206897	0.030303	0.030303	0.027778	0.153846	0.166667	0.232558	0.045455	0.153846	0.121212	0.060606	0.26087	0.055556	0	0.16129	0	0.012048	0.147059	0.194444	0.378378	0.172414	0.171429	0.361111	0.037037	0.294118	0.05	0.285714	0.268293	0.235294	0.307692	0.255319	0.27027	0.113208	0.257143	0	0.097561	0.230769	0.09375
0.116667	0.134328	0.1	0.131579	0.060606	0.09375	0.107143	0.147059	0.096774	0.068966	0.103448	0.058824	0.066667	0.107143	0.068966	0.0625	0.135135	0.066667	0.162791	0.075	0.105263	0.096774	0.142857	0.170213	0.166667	0.071429	0.1	0	0.08	0.125	0.212121	0.2	0.140351	0.151515	0.210526	0.152174	0.108108	0.147059	0.105263	0.195122	0.181818	0.170732	0.166667	0.222222	0.166667	0.138889	0.097561	0.135135	0.153846	0.142857
0.122807	0.106061	0.071429	0.081081	0.066667	0.103448	0.12	0.125	0.107143	0.076923	0.115385	0.03125	0.074074	0.12	0.076923	0.107143	0.181818	0.074074	0.146341	0.025641	0.147059	0.107143	0.16	0.130435	0.103448	0.076923	0.111111	0	0.068493	0.137931	0.193548	0.216216	0.148148	0.166667	0.228571	0.086957	0.151515	0.090909	0.114286	0.15	0.16129	0.184211	0.12766	0.205882	0.104167	0.151515	0.105263	0.181818	0.135135	0.074074
0.066667	0.106061	0.034483	0.025641	0	0.142857	0.12	0.058824	0.148148	0.076923	0.16	0.03125	0.115385	0.037037	0.037037	0.033333	0.083333	0.115385	0.146341	0	0.083333	0.107143	0.035714	0.106383	0.032258	0.02439	0.153846	0	0.012987	0.137931	0.15625	0.184211	0.127273	0.129032	0.194444	0.041667	0.225806	0	0.114286	0.179487	0.16129	0.153846	0.104167	0.138889	0.081633	0.117647	0.02439	0.114286	0.105263	0.035714
0.09434	0.098361	0.043478	0.096774	0	0.083333	0.1	0.034483	0.136364	0	0.210526	0	0.045455	0.157895	0.1	0.086957	0.1	0.095238	0.138889	0	0.1	0.086957	0.15	0.15	0	0.058824	0.043478	0	0.028571	0.08	0.148148	0.147059	0.076923	0.16	0.275862	0.047619	0.066667	0.071429	0.137931	0.111111	0.111111	0.147059	0.175	0.206897	0.068182	0.142857	0.058824	0.064516	0.2	0.045455
0.103448	0.140625	0.071429	0.052632	0.032258	0.142857	0.12	0.090909	0.148148	0.076923	0.16	0.03125	0.115385	0.076923	0.076923	0.068966	0.147059	0.115385	0.175	0.025641	0.147059	0.107143	0.115385	0.130435	0.066667	0.02439	0.153846	0	0.04	0.178571	0.193548	0.285714	0.148148	0.166667	0.228571	0.041667	0.225806	0.058824	0.147059	0.179487	0.2	0.216216	0.152174	0.205882	0.12766	0.151515	0.05	0.114286	0.166667	0.074074
0.084746	0.123077	0.034483	0.052632	0.066667	0.142857	0.12	0.090909	0.148148	0.076923	0.16	0	0.115385	0.076923	0.076923	0.068966	0.114286	0.115385	0.175	0	0.114286	0.107143	0.074074	0.130435	0.032258	0	0.153846	0.034483	0.012987	0.137931	0.193548	0.216216	0.127273	0.166667	0.194444	0.041667	0.225806	0	0.147059	0.15	0.16129	0.153846	0.12766	0.138889	0.104167	0.117647	0.02439	0.083333	0.105263	0.035714
0.131579	0.130952	0.04	0.068966	0.018868	0.102041	0.086957	0.074074	0.06	0	0.108696	0.037736	0.108696	0.041667	0.020408	0.104167	0.089286	0.108696	0.169492	0.107143	0.089286	0.081633	0.040816	0.15625	0.08	0.084746	0.083333	0	0.098901	0.145833	0.204082	0.218182	0.150685	0.163265	0.160714	0.107692	0.2	0.115385	0.244898	0.236364	0.183673	0.240741	0.190476	0.211538	0.315789	0.2	0.032258	0.051724	0.185185	0.108696
0.15873	0.188406	0.026316	0.042553	0.051282	0.205882	0.121212	0.153846	0.111111	0.088235	0.151515	0.05	0.1875	0.057143	0.027778	0.081081	0.170732	0.151515	0.217391	0.042553	0.2	0.111111	0.055556	0.196078	0.138889	0.085106	0.147059	0	0.16	0.166667	0.277778	0.317073	0.290909	0.222222	0.238095	0.18	0.27027	0.097561	0.297297	0.410256	0.285714	0.384615	0.192308	0.315789	0.192308	0.27027	0.214286	0.170732	0.243902	0.055556
0.169811	0.224138	0.076923	0.055556	0.153846	0.111111	0.238095	0.096774	0.16	0	0.125	0.107143	0.08	0.130435	0.130435	0.115385	0.321429	0.125	0.40625	0.055556	0.37037	0.208333	0.125	0.219512	0.071429	0.052632	0.12	0.12	0.101449	0.148148	0.206897	0.194444	0.176471	0.178571	0.242424	0.116279	0.2	0.133333	0.15625	0.189189	0.214286	0.194444	0.214286	0.258065	0.243902	0.2	0.081081	0.275862	0.212121	0.08
0.018182	0.015625	0.047619	0.032258	0	0.043478	0	0.037037	0.045455	0.176471	0.05	0	0	0.052632	0.052632	0	0.033333	0	0	0	0	0	0.05	0.023256	0.090909	0.133333	0	0	0.060606	0.136364	0	0	0.058824	0	0	0.105263	0	0	0	0.151515	0	0	0.022727	0.03125	0	0	0.133333	0.068966	0	0.05
0.076923	0.065574	0.1	0.142857	0.090909	0.090909	0.052632	0.166667	0.095238	0.176471	0.166667	0.041667	0	0.111111	0.111111	0.095238	0.068966	0	0.083333	0.032258	0.068966	0.045455	0.235294	0.128205	0.142857	0.133333	0	0.047619	0.09375	0.041667	0.074074	0.027778	0.058824	0.08	0.09375	0.135135	0	0.076923	0.107143	0.1875	0.037037	0.088235	0.097561	0.064516	0.097561	0.034483	0.172414	0.107143	0.096774	0.105263
0.142857	0.15873	0.111111	0.212121	0.032258	0.142857	0.12	0.090909	0.148148	0	0.208333	0.064516	0.115385	0.12	0.076923	0.148148	0.147059	0.115385	0.205128	0.142857	0.114286	0.107143	0.16	0.209302	0.103448	0.076923	0.153846	0	0.068493	0.178571	0.275862	0.25	0.169811	0.25	0.228571	0.111111	0.1875	0.241379	0.21875	0.243243	0.2	0.323529	0.232558	0.322581	0.204545	0.1875	0.05	0.083333	0.235294	0.16
0.169492	0.164179	0.060606	0.184211	0.027778	0.15625	0.137931	0.078947	0.090909	0	0.214286	0.055556	0.172414	0.064516	0.03125	0.090909	0.157895	0.133333	0.238095	0.184211	0.157895	0.125	0.096774	0.266667	0.088235	0.068182	0.206897	0	0.064103	0.225806	0.272727	0.25	0.175439	0.25	0.297297	0.1	0.228571	0.242424	0.294118	0.243902	0.205882	0.315789	0.288889	0.277778	0.288889	0.30303	0.044444	0.1	0.27027	0.133333
0.145455	0.107692	0	0.083333	0	0.192308	0.173913	0	0.111111	0	0.272727	0.032258	0.217391	0.038462	0.038462	0.071429	0.151515	0.166667	0.179487	0	0.151515	0.111111	0.037037	0.275	0	0.025	0.16	0	0.026667	0.185185	0.285714	0.294118	0.150943	0.259259	0.3125	0.042553	0.321429	0.029412	0.310345	0.323529	0.296296	0.333333	0.268293	0.25	0.106383	0.321429	0.025	0.085714	0.322581	0
0.119403	0.135135	0.051282	0.085106	0.131579	0.04878	0.054054	0.093023	0.05	0.054054	0.025641	0.073171	0.025641	0.054054	0.054054	0.076923	0.136364	0.025641	0.183673	0.085106	0.136364	0.076923	0.052632	0.125	0.131579	0.152174	0.078947	0.025	0.202703	0.1	0.142857	0.142857	0.237288	0.15	0.125	0.244898	0.113636	0.119048	0.086957	0.23913	0.205128	0.166667	0.142857	0.209302	0.230769	0.139535	0.204545	0.162791	0.12766	0.111111
0.09	0.113208	0.027397	0.024096	0.115942	0.026667	0.028169	0.08	0.027027	0.057971	0	0.026316	0	0.042857	0.042857	0.055556	0.076923	0	0.108434	0.011905	0.090909	0.027027	0.042254	0.031915	0.054795	0.115385	0.013514	0.027397	0.5	0.012987	0.051282	0.046512	0.202247	0.052632	0.023256	0.233766	0.012195	0.051948	0.02439	0.070588	0.065789	0.046512	0.031579	0.088608	0.139535	0.024691	0.225352	0.12	0.035714	0.013699
0.115385	0.098361	0.263158	0.172414	0.083333	0.625	0.157895	0.153846	0.470588	0.157895	0.277778	0.227273	0.4375	0.294118	0.375	0.041667	0.178571	0.352941	0.138889	0.133333	0.137931	0.315789	0.352941	0.277778	0.181818	0.125	0.5	0.2	0.043478	0.421053	0.409091	0.344828	0.12	0.611111	0.193548	0.1	0.391304	0.071429	0.375	0.176471	0.25	0.344828	0.305556	0.25	0.146341	0.333333	0.028571	0.1	0.333333	0.277778
0.145833	0.122807	0	0	0.045455	0.210526	0.266667	0	0.157895	0	0.25	0.043478	0.25	0	0.055556	0.047619	0.25	0.25	0.225806	0	0.25	0.222222	0	0.194444	0	0	0.3125	0.05	0.029851	0.263158	0.333333	0.285714	0.152174	0.238095	0.214286	0.025	0.45	0	0.25	0.233333	0.285714	0.241379	0.189189	0.230769	0.128205	0.26087	0	0.153846	0.222222	0
0.137931	0.102941	0.032258	0.105263	0.096774	0.096774	0.111111	0.055556	0.1	0	0.148148	0.09375	0.107143	0.071429	0.071429	0.064516	0.138889	0.107143	0.166667	0.076923	0.138889	0.137931	0.107143	0.173913	0.0625	0.1	0.185185	0.066667	0.09589	0.166667	0.21875	0.175	0.163636	0.193548	0.216216	0.106383	0.176471	0.1875	0.171429	0.2	0.1875	0.236842	0.170213	0.228571	0.170213	0.176471	0.047619	0.138889	0.222222	0.068966
0.113208	0.114754	0.086957	0.09375	0.08	0.421053	0.15	0.068966	0.238095	0	0.263158	0.076923	0.333333	0.095238	0.095238	0.181818	0.133333	0.263158	0.166667	0.09375	0.133333	0.083333	0.142857	0.175	0.08	0.057143	0.25	0.041667	0.042857	0.272727	0.28	0.290323	0.117647	0.428571	0.1875	0.125	0.178571	0.148148	0.307692	0.205882	0.192308	0.290323	0.2	0.241379	0.230769	0.269231	0.057143	0.096774	0.275862	0.090909
0.185185	0.140625	0	0.052632	0.066667	0.185185	0.166667	0	0.107143	0	0.26087	0.03125	0.208333	0.037037	0.076923	0.033333	0.181818	0.16	0.236842	0	0.181818	0.148148	0.035714	0.268293	0	0.02439	0.2	0.071429	0.054054	0.178571	0.275862	0.323529	0.215686	0.206897	0.387097	0.06383	0.357143	0.028571	0.444444	0.393939	0.333333	0.363636	0.261905	0.28125	0.104167	0.310345	0.02439	0.114286	0.448276	0
0.076923	0.083333	0.047619	0.032258	0.090909	0.043478	0	0	0.045455	0	0	0.041667	0	0.176471	0.111111	0.277778	0.033333	0	0.114286	0	0.033333	0	0.166667	0.023256	0	0.0625	0.047619	0.1	0.044776	0.041667	0.074074	0.088235	0.058824	0.125	0.060606	0.105263	0.111111	0.076923	0.033333	0.085714	0.037037	0.088235	0.046512	0.064516	0.071429	0.071429	0.0625	0.033333	0.0625	0
0.12963	0.129032	0.173913	0.121212	0.115385	0.318182	0.136364	0.137931	0.217391	0.086957	0.181818	0.153846	0.368421	0.190476	0.190476	0.12	0.2	0.3	0.222222	0.121212	0.2	0.166667	0.181818	0.195122	0.16	0.147059	0.5	0.173913	0.102941	0.428571	0.307692	0.272727	0.18	0.454545	0.25	0.146341	0.296296	0.137931	0.285714	0.194444	0.178571	0.272727	0.219512	0.266667	0.282051	0.4	0.054054	0.16129	0.3	0.181818
0.245614	0.15942	0.15625	0.236842	0.147059	0.344828	0.129032	0.162162	0.225806	0.206897	0.241379	0.176471	0.285714	0.129032	0.166667	0	0.243243	0.241379	0.227273	0.146341	0.243243	0.1875	0.16129	0.340909	0.21875	0.113636	0.275862	0.15625	0.075949	0.25	0.294118	0.3	0.189655	0.272727	0.25	0.14	0.323529	0.075	0.4375	0.394737	0.194444	0.333333	0.333333	0.2	0.153846	0.323529	0.065217	0.210526	0.4	0.2
0.169492	0.114286	0.029412	0.022727	0.027778	0.233333	0.137931	0.078947	0.125	0.1	0.214286	0	0.214286	0.03125	0.03125	0	0.157895	0.172414	0.083333	0	0.157895	0.090909	0.030303	0.163265	0.057143	0.044444	0.166667	0	0.050633	0.151515	0.235294	0.282051	0.175439	0.142857	0.333333	0.078431	0.228571	0	0.333333	0.307692	0.205882	0.219512	0.183673	0.179487	0.09434	0.264706	0.093023	0.157895	0.205128	0.030303
0.15	0.114286	0	0	0.057143	0.15625	0.137931	0	0.090909	0	0.133333	0.027027	0.172414	0	0.03125	0	0.157895	0.133333	0.130435	0	0.157895	0.090909	0	0.163265	0	0	0.25	0.060606	0.0375	0.266667	0.2	0.219512	0.155172	0.111111	0.333333	0.037736	0.34375	0	0.257143	0.214286	0.242424	0.219512	0.16	0.179487	0.115385	0.34375	0	0.1	0.305556	0
0.054545	0.063492	0.333333	0.259259	0.04	0.238095	0	0.25	0.25	0.157895	0.045455	0.227273	0.15	0.294118	0.294118	0.086957	0.064516	0.15	0.078947	0.172414	0.03125	0.136364	0.277778	0.15	0.3	0.090909	0.142857	0.2	0.028571	0.125	0.107143	0.114286	0	0.16	0	0.1	0.185185	0.071429	0.1	0.142857	0	0.114286	0.175	0.09375	0.093023	0.103448	0	0.03125	0.090909	0.4375
0.177419	0.171429	0.054054	0.065217	0.051282	0.171429	0.121212	0.046512	0.142857	0	0.117647	0.05	0.117647	0.027778	0.027778	0.052632	0.142857	0.117647	0.217391	0.042553	0.142857	0.111111	0.055556	0.244898	0.051282	0	0.147059	0.026316	0.035714	0.135135	0.243243	0.317073	0.183333	0.157895	0.238095	0.053571	0.382353	0.046512	0.230769	0.309524	0.285714	0.317073	0.24	0.25	0.127273	0.236842	0	0.090909	0.275	0.055556
0.151899	0.123596	0.075472	0.063492	0.156863	0.072727	0	0.105263	0.074074	0.1	0.018182	0.071429	0.056604	0.122449	0.122449	0.035714	0.137931	0.056604	0.088235	0.046875	0.118644	0.054545	0.12	0.053333	0.092593	0.131148	0.075472	0.096154	0.25	0.071429	0.084746	0.074627	0.253521	0.087719	0.029412	0.203125	0.065574	0.032787	0.064516	0.057971	0.067797	0.074627	0.066667	0.0625	0.025641	0.083333	0.254545	0.178571	0.061538	0.076923
0.174603	0.185714	0.025641	0.041667	0.02439	0.135135	0.117647	0.045455	0.108108	0	0.114286	0.04878	0.114286	0	0	0.025	0.139535	0.114286	0.212766	0.041667	0.139535	0.108108	0.026316	0.215686	0.05	0.019608	0.142857	0	0.035294	0.131579	0.205128	0.309524	0.180328	0.153846	0.232558	0.034483	0.371429	0.045455	0.225	0.302326	0.277778	0.309524	0.211538	0.243902	0.125	0.230769	0	0.088889	0.268293	0.054054
0.154545	0.182609	0.056818	0.131868	0.055556	0.104651	0.045977	0.053191	0.068182	0.022472	0.069767	0.078652	0.095238	0.05814	0.05814	0.08046	0.085106	0.082353	0.170213	0.107527	0.085106	0.05618	0.057471	0.197917	0.055556	0.060606	0.094118	0.068966	0.068182	0.090909	0.136364	0.186813	0.126126	0.139535	0.177778	0.086538	0.16092	0.042105	0.172414	0.197802	0.11236	0.186813	0.208333	0.11828	0.171717	0.16092	0.019417	0.0625	0.179775	0.069767
0.181818	0.225352	0.1	0.148936	0.095238	0.179487	0.105263	0.086957	0.125	0.05	0.102564	0.119048	0.162162	0.135135	0.105263	0.184211	0.177778	0.131579	0.326087	0.102041	0.177778	0.125	0.131579	0.294118	0.095238	0.191489	0.157895	0.128205	0.135802	0.175	0.275	0.311111	0.225806	0.324324	0.212766	0.185185	0.238095	0.086957	0.232558	0.25	0.219512	0.340909	0.288462	0.27907	0.240741	0.238095	0.037037	0.12766	0.302326	0.131579
0.209677	0.2	0.108108	0.133333	0.102564	0.194444	0.114286	0.093023	0.135135	0.054054	0.111111	0.128205	0.176471	0.147059	0.114286	0.135135	0.190476	0.176471	0.348837	0.085106	0.190476	0.135135	0.111111	0.3125	0.102564	0.12766	0.205882	0.138889	0.085366	0.222222	0.333333	0.435897	0.196721	0.314286	0.317073	0.150943	0.324324	0.093023	0.315789	0.325581	0.305556	0.473684	0.306122	0.238095	0.254902	0.324324	0.039216	0.136364	0.394737	0.111111
0.136364	0.183099	0.108108	0.186047	0.131579	0.075	0	0.236842	0.076923	0.083333	0	0.128205	0.052632	0.114286	0.114286	0.105263	0.111111	0.052632	0.183673	0.159091	0.111111	0.05	0.176471	0.086207	0.194444	0.152174	0.078947	0.138889	0.186667	0.128205	0.090909	0.12	0.15873	0.15	0.038462	0.270833	0.065217	0.119048	0.06383	0.075472	0.021739	0.098039	0.103448	0.083333	0.185185	0.088889	0.204545	0.190476	0.152174	0.142857
0.163934	0.15942	0.057143	0.175	0.083333	0.054054	0	0.162162	0.055556	0.060606	0.058824	0.052632	0	0.09375	0.060606	0.1875	0.095238	0	0.102041	0.068182	0.095238	0	0.125	0.113208	0.114286	0.139535	0	0.027778	0.118421	0.081081	0.047619	0.083333	0.112903	0.105263	0.086957	0.1875	0	0.194444	0.069767	0.081633	0.02381	0.106383	0.132075	0.116279	0.111111	0.071429	0.139535	0.095238	0.113636	0.090909
0.175439	0.151515	0.178571	0.264706	0.206897	0.166667	0	0.21875	0.172414	0.107143	0.066667	0.16129	0.103448	0.192308	0.24	0.0625	0.2	0.103448	0.162791	0.102564	0.166667	0.096774	0.230769	0.195652	0.166667	0.125	0.137931	0.222222	0.125	0.125	0.111111	0.116279	0.12069	0.1875	0.095238	0.152174	0.108108	0.083333	0.135135	0.088889	0.054054	0.116279	0.166667	0.073171	0.098039	0.138889	0.125	0.2	0.097561	0.185185
0.163636	0.123077	0.111111	0.111111	0.032258	0.28	0.166667	0.090909	0.192308	0.076923	0.16	0.1	0.26087	0.076923	0.076923	0.033333	0.181818	0.26087	0.175	0.081081	0.181818	0.192308	0.074074	0.268293	0.103448	0.05	0.304348	0.071429	0.026316	0.269231	0.321429	0.363636	0.169811	0.206897	0.30303	0.020408	0.461538	0.028571	0.444444	0.277778	0.285714	0.363636	0.261905	0.28125	0.12766	0.52	0	0.114286	0.4	0.115385
0.163636	0.123077	0.111111	0.111111	0.032258	0.28	0.166667	0.090909	0.192308	0.076923	0.16	0.1	0.26087	0.076923	0.076923	0.033333	0.181818	0.26087	0.175	0.081081	0.181818	0.192308	0.074074	0.268293	0.103448	0.05	0.304348	0.071429	0.026316	0.269231	0.321429	0.363636	0.169811	0.206897	0.30303	0.020408	0.461538	0.028571	0.444444	0.277778	0.285714	0.363636	0.261905	0.28125	0.12766	0.52	0	0.114286	0.4	0.115385
0.133333	0.115942	0.030303	0.1	0.125	0.125	0.142857	0.081081	0.09375	0.103448	0.178571	0.027778	0.137931	0.032258	0.032258	0.060606	0.131579	0.137931	0.159091	0.023256	0.131579	0.09375	0.064516	0.142857	0.090909	0.069767	0.172414	0	0.138889	0.193548	0.205882	0.195122	0.245283	0.181818	0.205128	0.148936	0.2	0.052632	0.194444	0.351351	0.290323	0.225	0.163265	0.153846	0.14	0.166667	0.243243	0.194444	0.210526	0.03125
0.137931	0.136364	0.032258	0.02439	0.030303	0.172414	0.111111	0.027027	0.137931	0	0.148148	0.029412	0.148148	0.071429	0.034483	0.137931	0.171429	0.148148	0.195122	0.02439	0.171429	0.137931	0.068966	0.173913	0.030303	0.1	0.103448	0	0.066667	0.129032	0.258065	0.236842	0.185185	0.275862	0.184211	0.130435	0.176471	0.117647	0.242424	0.170732	0.225806	0.236842	0.195652	0.387097	0.170213	0.25	0.047619	0.108108	0.222222	0.033333
0.047619	0.102941	0	0	0.0625	0	0.071429	0.1875	0	0.111111	0	0	0	0.071429	0.034483	0.064516	0.078947	0	0.088889	0	0.108108	0.064516	0.068966	0.018868	0.096774	0.157895	0	0	0.212121	0.029412	0.054054	0.068182	0.142857	0.057143	0.022727	0.268293	0	0.055556	0.025	0.090909	0.027027	0.044444	0.018519	0.04878	0.122449	0.052632	0.692308	0.138889	0.047619	0
0.157895	0.136364	0.032258	0.02439	0.030303	0.214286	0.153846	0	0.137931	0	0.148148	0	0.192308	0.034483	0.034483	0.03125	0.138889	0.148148	0.166667	0	0.138889	0.1	0.033333	0.255814	0	0	0.142857	0.032258	0	0.129032	0.3	0.305556	0.122807	0.233333	0.285714	0.019608	0.290323	0	0.322581	0.333333	0.225806	0.305556	0.25	0.194444	0.1	0.25	0	0.078947	0.294118	0
0.064516	0.119403	0	0	0	0.133333	0.153846	0.085714	0.1	0.034483	0.148148	0.029412	0.148148	0.071429	0.034483	0.1	0.078947	0.148148	0.195122	0	0.108108	0.137931	0.068966	0.125	0	0.073171	0.185185	0	0.09589	0.206897	0.258065	0.205128	0.122807	0.233333	0.153846	0.061224	0.25	0.055556	0.171429	0.2	0.1875	0.236842	0.122449	0.194444	0.195652	0.212121	0.1	0.108108	0.189189	0
0.121622	0.15	0.113636	0.092593	0.02	0.214286	0.093023	0.037736	0.136364	0.044444	0.116279	0.083333	0.2	0.093023	0.093023	0.086957	0.074074	0.170732	0.137931	0.072727	0.074074	0.136364	0.116279	0.267857	0.040816	0.070175	0.166667	0.113636	0.054348	0.181818	0.302326	0.28	0.140845	0.255814	0.215686	0.045455	0.266667	0.037736	0.380952	0.160714	0.195652	0.28	0.263158	0.2	0.142857	0.295455	0.033898	0.035714	0.355556	0.043478
0.196429	0.169231	0	0.075	0.029412	0.166667	0.148148	0.026316	0.096774	0	0.230769	0.028571	0.185185	0.068966	0.068966	0.0625	0.166667	0.142857	0.25	0	0.166667	0.096774	0.066667	0.25	0	0.046512	0.222222	0.03125	0.038462	0.241379	0.25	0.263158	0.181818	0.1875	0.769231	0.06	0.28125	0.054054	0.3125	0.25641	0.3	0.333333	0.272727	0.294118	0.166667	0.366667	0.046512	0.105263	0.285714	0
0.107143	0.126984	0.12	0.085714	0.034483	0.304348	0.181818	0.0625	0.26087	0.083333	0.173913	0.068966	0.285714	0.181818	0.181818	0.115385	0.121212	0.227273	0.216216	0.055556	0.121212	0.208333	0.173913	0.219512	0.071429	0.111111	0.272727	0.12	0.055556	0.291667	0.842105	0.387097	0.2	0.434783	0.242424	0.066667	0.384615	0.0625	0.48	0.222222	0.36	0.433333	0.243902	0.3	0.186047	0.44	0.052632	0.088235	0.481481	0.08
0.14	0.118644	0.045455	0.03125	0.086957	0.25	0.235294	0.035714	0.142857	0	0.294118	0.083333	0.294118	0.105263	0.105263	0.2	0.142857	0.294118	0.212121	0.03125	0.142857	0.142857	0.157895	0.125	0.041667	0.09375	0.277778	0.045455	0.059701	0.238095	0.304348	0.266667	0.170213	0.333333	0.2	0.102564	0.24	0.16	0.28	0.21875	0.26087	0.310345	0.15	0.259259	0.179487	0.24	0.060606	0.142857	0.25	0.047619
0.089286	0.076923	0	0	0	0.208333	0.190476	0	0.12	0	0.238095	0	0.238095	0.086957	0.041667	0.217391	0.090909	0.238095	0.128205	0.027778	0.090909	0.12	0.083333	0.088889	0	0.147059	0.173913	0	0.071429	0.304348	0.259259	0.2	0.134615	0.28	0.142857	0.093023	0.206897	0.137931	0.241379	0.131579	0.222222	0.235294	0.136364	0.225806	0.219512	0.206897	0.054054	0.058824	0.181818	0
0.081967	0.071429	0	0	0	0.172414	0.153846	0	0.1	0	0.192308	0	0.192308	0.071429	0.034483	0.137931	0.078947	0.192308	0.113636	0.02439	0.078947	0.1	0.068966	0.08	0	0.128205	0.142857	0	0.111111	0.25	0.258065	0.205128	0.142857	0.233333	0.184211	0.083333	0.142857	0.151515	0.205882	0.090909	0.225806	0.175	0.122449	0.228571	0.222222	0.176471	0.047619	0.051282	0.189189	0
0.15493	0.151899	0.043478	0.16	0.020408	0.136364	0.095238	0.058824	0.088889	0	0.146341	0.040816	0.119048	0.045455	0.022222	0.113636	0.096154	0.093023	0.181818	0.115385	0.096154	0.065217	0.068182	0.22807	0.06383	0.071429	0.142857	0	0.054945	0.159091	0.195652	0.26	0.15942	0.177778	0.297872	0.096774	0.272727	0.173913	0.23913	0.254902	0.2	0.285714	0.245614	0.229167	0.267857	0.272727	0.034483	0.075472	0.22449	0.093023
0.192982	0.178862	0.030303	0.098039	0.061224	0.050505	0.030928	0.058824	0.05102	0.010101	0.063158	0.029412	0.030612	0.030928	0.030928	0.084211	0.14433	0.041237	0.101852	0.056604	0.14433	0.03	0.041237	0.107143	0.04	0.065421	0.040816	0.02	0.171875	0.05	0.09	0.093458	0.155172	0.07	0.105769	0.12963	0.067961	0.038462	0.07767	0.092593	0.069307	0.103774	0.126126	0.118812	0.168224	0.078431	0.075472	0.132653	0.106796	0.041237
0.166667	0.190476	0.017857	0.030769	0.092593	0.072727	0.1	0.086207	0.054545	0.057692	0.076923	0.052632	0.076923	0.037736	0.037736	0.054545	0.157895	0.076923	0.233333	0.030769	0.157895	0.09434	0.056604	0.19697	0.092593	0.078125	0.096154	0.017857	0.193182	0.132075	0.185185	0.180328	0.289855	0.127273	0.186441	0.166667	0.181818	0.067797	0.137931	0.258621	0.211538	0.220339	0.19403	0.192982	0.111111	0.160714	0.210526	0.157895	0.232143	0.037037
0.1875	0.214286	0.272727	0.268293	0.047619	0.257143	0.142857	0.2	0.194444	0.081081	0.171429	0.216216	0.205882	0.176471	0.142857	0.075	0.133333	0.171429	0.311111	0.209302	0.186047	0.228571	0.171429	0.684211	0.157895	0.102041	0.2	0.2	0.046512	0.216216	0.361111	0.390244	0.15625	0.305556	0.309524	0.087719	0.315789	0.090909	0.342105	0.288889	0.263158	0.5	0.666667	0.232558	0.226415	0.351351	0.058824	0.085106	0.317073	0.171429
0.136364	0.12	0.138889	0.159091	0.04878	0.30303	0.114286	0.236842	0.2	0.21875	0.142857	0.128205	0.25	0.114286	0.114286	0.05	0.136364	0.212121	0.137255	0.133333	0.162791	0.166667	0.142857	0.26	0.228571	0.152174	0.242424	0.108108	0.155844	0.294118	0.2	0.191489	0.15873	0.314286	0.148936	0.196078	0.166667	0.068182	0.25	0.23913	0.119048	0.191489	0.230769	0.130435	0.185185	0.225	0.177778	0.162791	0.204545	0.176471
0	0.060606	0	0	0.035714	0	0.086957	0.137931	0	0.136364	0	0	0	0.086957	0.041667	0.076923	0	0	0.1	0	0.028571	0.076923	0.083333	0.020833	0.074074	0.181818	0	0	0.171875	0.034483	0.0625	0.076923	0.072727	0.066667	0.025641	0.146341	0	0.064516	0.028571	0.075	0.03125	0.05	0.020408	0.055556	0.136364	0.060606	0.3	0.090909	0.054054	0
0.16	0.098361	0.090909	0.172414	0.04	0.238095	0.157895	0.071429	0.25	0	0.4375	0.038462	0.210526	0.047619	0.047619	0.041667	0.222222	0.277778	0.138889	0.0625	0.178571	0.136364	0.095238	0.243243	0.083333	0	0.2	0	0.014085	0.173913	0.192308	0.21875	0.076923	0.208333	0.233333	0.047619	0.28	0.034483	0.222222	0.37931	0.2	0.3	0.236842	0.206897	0.146341	0.185185	0	0.137931	0.285714	0.15
0.175439	0.1875	0.064516	0.102564	0.060606	0.206897	0.148148	0.083333	0.133333	0	0.142857	0.058824	0.185185	0.107143	0.068966	0.172414	0.135135	0.142857	0.282051	0.102564	0.135135	0.096774	0.142857	0.222222	0.060606	0.071429	0.222222	0.03125	0.051948	0.241379	0.333333	0.371429	0.203704	0.266667	0.393939	0.104167	0.366667	0.21875	0.354839	0.289474	0.3	0.411765	0.217391	0.294118	0.244444	0.413793	0.046512	0.105263	0.285714	0.103448
0.166667	0.146667	0.131579	0.177778	0.046512	0.285714	0.108108	0.25641	0.189189	0.138889	0.135135	0.121951	0.235294	0.108108	0.108108	0.073171	0.130435	0.2	0.176471	0.152174	0.155556	0.157895	0.135135	0.27451	0.184211	0.122449	0.228571	0.102564	0.083333	0.277778	0.282051	0.318182	0.153846	0.297297	0.244444	0.145455	0.275	0.088889	0.368421	0.311111	0.195122	0.318182	0.294118	0.148936	0.2	0.342105	0.122449	0.155556	0.27907	0.166667
0.157895	0.153846	0.066667	0.105263	0.0625	0.259259	0.153846	0.055556	0.178571	0	0.148148	0.060606	0.192308	0.111111	0.071429	0.178571	0.171429	0.148148	0.195122	0.05	0.171429	0.1	0.107143	0.255814	0.0625	0.073171	0.185185	0.032258	0.052632	0.296296	0.392857	0.342857	0.185185	0.48	0.323529	0.106383	0.290323	0.117647	0.366667	0.263158	0.310345	0.342857	0.27907	0.34375	0.222222	0.333333	0.047619	0.108108	0.333333	0.068966
0.15	0.2	0	0	0.057143	0.15625	0.178571	0.108108	0.090909	0.064516	0.133333	0	0.172414	0.064516	0.03125	0.058824	0.128205	0.133333	0.268293	0	0.157895	0.16129	0.0625	0.266667	0.057143	0.093023	0.166667	0	0.092105	0.1875	0.354839	0.388889	0.240741	0.25	0.297297	0.078431	0.30303	0.051282	0.333333	0.307692	0.366667	0.388889	0.26087	0.352941	0.183673	0.30303	0.119048	0.157895	0.305556	0
0.057692	0.04918	0.235294	0.148148	0.095238	0.210526	0	0.285714	0.222222	0.461538	0.052632	0.2	0.176471	0.266667	0.266667	0	0.111111	0.176471	0.027027	0.148148	0.111111	0.157895	0.25	0.102564	0.4375	0.178571	0.166667	0.166667	0.078125	0.142857	0.12	0.090909	0.081633	0.181818	0	0.138889	0.115385	0.038462	0.111111	0.15625	0	0.090909	0.1	0.032258	0.023256	0.115385	0.137931	0.153846	0.064516	0.333333
0.15625	0.169014	0.052632	0.06383	0.02439	0.135135	0.117647	0.210526	0.078947	0.085714	0.114286	0.04878	0.114286	0	0	0.025	0.139535	0.114286	0.23913	0.06383	0.139535	0.108108	0.026316	0.24	0.166667	0.04	0.142857	0	0.113924	0.131579	0.236842	0.25	0.220339	0.125	0.204545	0.153846	0.297297	0.045455	0.225	0.473684	0.243243	0.309524	0.235294	0.214286	0.166667	0.297297	0.155556	0.139535	0.209302	0.114286
0.133333	0.1	0	0	0.16129	0	0	0.111111	0	0.103448	0	0.027778	0	0.066667	0.066667	0.060606	0.131579	0	0.085106	0	0.131579	0	0.064516	0	0.090909	0.15	0.030303	0.0625	0.242424	0.027778	0.051282	0.065217	0.245283	0.054054	0.044444	0.35	0.02439	0.052632	0.02381	0.111111	0.052632	0.042553	0.017857	0.046512	0.075472	0.05	0.393939	0.194444	0.045455	0
0.127273	0.145161	0.12	0.117647	0	0.363636	0.181818	0.096774	0.26087	0.130435	0.173913	0.107143	0.421053	0.181818	0.181818	0.074074	0.121212	0.35	0.216216	0.085714	0.121212	0.26087	0.173913	0.282051	0.111111	0.111111	0.473684	0.12	0.013333	0.47619	0.521739	0.433333	0.176471	0.375	0.366667	0.021277	0.636364	0.030303	0.541667	0.294118	0.416667	0.482759	0.275	0.258065	0.159091	0.714286	0.025641	0.088235	0.37931	0.125
0.09434	0.063492	0	0.096774	0	0.04	0.1	0.034483	0.086957	0	0.15	0	0.045455	0.047619	0.047619	0.041667	0.1	0.095238	0.108108	0	0.1	0.086957	0.045455	0.121951	0	0.028571	0.043478	0	0.014085	0.08	0.107143	0.147059	0.056604	0.115385	0.275862	0.023256	0.066667	0.034483	0.137931	0.111111	0.111111	0.114286	0.119048	0.129032	0.044444	0.142857	0.028571	0.064516	0.16129	0
0.180328	0.246154	0.055556	0.090909	0.081081	0.176471	0.2	0.073171	0.114286	0	0.121212	0.078947	0.121212	0.090909	0.058824	0.083333	0.146341	0.121212	0.375	0.066667	0.175	0.147059	0.088235	0.304348	0.052632	0.041667	0.151515	0.055556	0.102564	0.171429	0.323529	0.358974	0.25	0.228571	0.307692	0.09434	0.314286	0.1	0.27027	0.317073	0.333333	0.358974	0.297872	0.4	0.244898	0.277778	0.06383	0.119048	0.282051	0.088235
0.19697	0.205479	0.184211	0.25	0.044444	0.205128	0.131579	0.186047	0.15	0.102564	0.157895	0.142857	0.189189	0.102564	0.102564	0.022222	0.148936	0.157895	0.291667	0.122449	0.2	0.179487	0.128205	0.634146	0.175	0.055556	0.153846	0.125	0.068966	0.142857	0.181818	0.25	0.149254	0.219512	0.208333	0.083333	0.204545	0.040816	0.227273	0.270833	0.159091	0.304348	0.511111	0.191489	0.152542	0.232558	0.055556	0.125	0.325581	0.157895
0.210526	0.238095	0.060606	0.097561	0.121212	0.057143	0.137931	0.205882	0.090909	0.03125	0.096774	0.085714	0.0625	0.064516	0.064516	0.090909	0.333333	0.096774	0.268293	0.071429	0.333333	0.125	0.096774	0.163265	0.121212	0.044444	0.09375	0.060606	0.121622	0.151515	0.166667	0.162791	0.218182	0.142857	0.142857	0.195652	0.162162	0.108108	0.1	0.186047	0.171429	0.162791	0.183673	0.179487	0.183673	0.162162	0.146341	0.257143	0.146341	0.133333
0.151515	0.133333	0.05	0.083333	0.023256	0.128205	0.111111	0.090909	0.075	0	0.138889	0.046512	0.138889	0.052632	0.025641	0.131579	0.108696	0.138889	0.156863	0.106383	0.108696	0.075	0.051282	0.163636	0.1	0.08	0.105263	0	0.058824	0.184211	0.25641	0.266667	0.138462	0.205128	0.195652	0.127273	0.219512	0.142857	0.275	0.288889	0.2	0.266667	0.203704	0.204545	0.25	0.25	0.038462	0.0625	0.227273	0.138889
0.122449	0.11215	0.013333	0.011765	0.114286	0.012987	0	0.064935	0.013158	0.042254	0	0.025974	0	0.027778	0.027778	0.054795	0.103896	0	0.081395	0.011765	0.103896	0	0.027397	0.010309	0.054054	0.1	0.013333	0.027027	0.278351	0.012821	0.024691	0.045977	0.255814	0.051948	0.022989	0.230769	0.012048	0.051282	0.011905	0.069767	0.051282	0.034091	0.020619	0.048193	0.076087	0.02439	0.173333	0.148649	0.035294	0.013514
0.133333	0.149254	0.030303	0.023256	0.028571	0.125	0.103448	0.111111	0.129032	0.103448	0.137931	0	0.1	0.032258	0.032258	0.029412	0.162162	0.1	0.133333	0	0.162162	0.09375	0.03125	0.098039	0.058824	0.045455	0.133333	0	0.078947	0.121212	0.138889	0.195122	0.178571	0.114286	0.175	0.102041	0.166667	0	0.102564	0.162791	0.142857	0.139535	0.096154	0.125	0.075472	0.105263	0.15	0.194444	0.095238	0.03125
0.257576	0.260274	0.020833	0.053571	0.108696	0.108696	0.093023	0.122449	0.086957	0.068182	0.142857	0.019608	0.090909	0.068182	0.068182	0.086957	0.26087	0.090909	0.245283	0	0.26087	0.086957	0.066667	0.163934	0.040816	0.109091	0.113636	0.042553	0.2125	0.130435	0.191489	0.163636	0.372881	0.148936	0.215686	0.189655	0.1875	0.057692	0.16	0.181818	0.195652	0.230769	0.180328	0.25	0.2	0.163265	0.196078	0.234043	0.150943	0.021277
0.272727	0.256757	0.041667	0.071429	0.130435	0.106383	0.090909	0.142857	0.085106	0.066667	0.139535	0.039216	0.088889	0.066667	0.066667	0.0625	0.255319	0.088889	0.264151	0.016949	0.229167	0.085106	0.065217	0.180328	0.061224	0.087719	0.111111	0.041667	0.225	0.12766	0.1875	0.181818	0.344262	0.122449	0.211538	0.186441	0.183673	0.056604	0.156863	0.2	0.191489	0.226415	0.196721	0.22	0.196721	0.16	0.169811	0.229167	0.148148	0.042553
0.162791	0.159574	0.03125	0.134328	0.046154	0.133333	0.066667	0.028571	0.080645	0	0.101695	0.045455	0.101695	0.04918	0.04918	0.063492	0.102941	0.083333	0.185714	0.055556	0.102941	0.046875	0.048387	0.205479	0.030303	0.068493	0.1	0.047619	0.096154	0.131148	0.15873	0.208955	0.139535	0.145161	0.274194	0.088608	0.15625	0.074627	0.190476	0.223881	0.16129	0.227273	0.219178	0.166667	0.186667	0.174603	0.026316	0.086957	0.164179	0.048387
0.169811	0.109375	0.166667	0.1875	0.034483	0.5	0.181818	0.133333	0.318182	0.130435	0.35	0.107143	0.421053	0.181818	0.181818	0.074074	0.121212	0.35	0.153846	0.085714	0.121212	0.26087	0.173913	0.315789	0.111111	0.111111	0.4	0.166667	0.013333	0.409091	0.521739	0.433333	0.153846	0.434783	0.366667	0.043478	0.44	0.030303	0.761905	0.294118	0.307692	0.482759	0.342105	0.21875	0.159091	0.5	0.025641	0.057143	0.538462	0.125
0.104478	0.121622	0.176471	0.136364	0.05	0.235294	0.117647	0.15	0.171429	0.151515	0.114286	0.162162	0.21875	0.117647	0.117647	0.025	0.088889	0.21875	0.163265	0.136364	0.113636	0.171429	0.114286	0.291667	0.135135	0.209302	0.25	0.176471	0.128205	0.264706	0.305556	0.341463	0.16129	0.216216	0.232558	0.176471	0.297297	0.022222	0.324324	0.272727	0.243243	0.27907	0.285714	0.186047	0.188679	0.371429	0.181818	0.113636	0.238095	0.083333
0.213115	0.136986	0.142857	0.282051	0.076923	0.272727	0.117647	0.095238	0.205882	0.085714	0.21875	0.131579	0.258065	0.117647	0.117647	0.025	0.139535	0.21875	0.163265	0.086957	0.139535	0.171429	0.147059	0.347826	0.105263	0.061224	0.25	0.142857	0.023256	0.228571	0.305556	0.309524	0.142857	0.323529	0.358974	0.052632	0.371429	0.022222	0.4	0.365854	0.210526	0.410256	0.340426	0.186047	0.125	0.333333	0	0.088889	0.333333	0.114286
0.125	0.125	0.074074	0.054054	0.107143	0.148148	0.173913	0.166667	0.153846	0.173913	0.166667	0.066667	0.12	0.08	0.125	0.034483	0.225806	0.12	0.210526	0.054054	0.1875	0.2	0.12	0.133333	0.192308	0.108108	0.16	0.035714	0.132353	0.142857	0.16129	0.157895	0.173077	0.172414	0.166667	0.166667	0.15625	0.060606	0.151515	0.285714	0.166667	0.157895	0.155556	0.212121	0.155556	0.15625	0.171429	0.225806	0.171429	0.12
0.126984	0.111111	0	0.044444	0.114286	0	0.029412	0.131579	0	0.09375	0.058824	0.025641	0	0.060606	0.060606	0.151515	0.121951	0	0.102041	0	0.15	0.027027	0.058824	0.053571	0.083333	0.195122	0.027778	0.057143	0.231884	0.025641	0.047619	0.083333	0.169492	0.076923	0.086957	0.295455	0.046512	0.102564	0.069767	0.152174	0.02381	0.106383	0.052632	0.066667	0.132075	0.046512	0.484848	0.243243	0.088889	0
0.3125	0.263158	0.074074	0.054054	0.148148	0.107143	0.125	0.129032	0.153846	0.08	0.166667	0.066667	0.076923	0.038462	0.08	0.034483	0.727273	0.12	0.277778	0.026316	0.583333	0.111111	0.076923	0.186047	0.107143	0.025	0.115385	0.074074	0.069444	0.103448	0.125	0.157895	0.22	0.096774	0.166667	0.113636	0.233333	0.029412	0.117647	0.216216	0.206897	0.157895	0.209302	0.212121	0.083333	0.15625	0.078947	0.52	0.138889	0.076923
0.190476	0.166667	0.051282	0.108696	0.02381	0.162162	0.114286	0.044444	0.135135	0	0.176471	0.023256	0.142857	0.083333	0.054054	0.105263	0.136364	0.111111	0.208333	0.02	0.136364	0.076923	0.111111	0.26	0.02381	0.06	0.171429	0.025	0.047059	0.222222	0.263158	0.302326	0.177419	0.210526	0.6875	0.070175	0.225	0.093023	0.315789	0.23913	0.27027	0.333333	0.28	0.3	0.185185	0.324324	0.039216	0.086957	0.292683	0.025641
0.168831	0.207317	0.037037	0.157895	0.054545	0.16	0.08	0.107143	0.096154	0.08	0.122449	0.053571	0.122449	0.08	0.058824	0.096154	0.12069	0.1	0.216667	0.064516	0.12069	0.075472	0.078431	0.258065	0.074074	0.114754	0.12	0.056604	0.130435	0.113208	0.188679	0.20339	0.189189	0.196078	0.254545	0.151515	0.163636	0.068966	0.27451	0.285714	0.192308	0.245614	0.274194	0.196429	0.274194	0.230769	0.096774	0.140351	0.214286	0.057692
0.121622	0.164557	0.042553	0.035088	0.133333	0.0625	0.068182	0.122449	0.086957	0.068182	0.090909	0.04	0.043478	0.068182	0.068182	0.086957	0.16	0.066667	0.222222	0.017241	0.16	0.086957	0.090909	0.145161	0.085106	0.12963	0.065217	0.020833	0.2125	0.083333	0.142857	0.207547	0.285714	0.125	0.192308	0.210526	0.163265	0.078431	0.09434	0.203704	0.170213	0.163636	0.16129	0.22449	0.142857	0.14	0.270833	0.183673	0.173077	0.043478
0.178082	0.1875	0.019608	0.087719	0.018868	0.125	0.086957	0.035714	0.081633	0.041667	0.159091	0.018519	0.108696	0.041667	0.020408	0.06	0.12963	0.133333	0.210526	0.016393	0.12963	0.081633	0.040816	0.275862	0.058824	0.084746	0.106383	0	0.086957	0.122449	0.204082	0.313725	0.183099	0.212766	0.3	0.125	0.22449	0.074074	0.270833	0.36	0.208333	0.313725	0.293103	0.26	0.136364	0.22449	0.103448	0.109091	0.254902	0.02
0.133333	0.149254	0.030303	0.047619	0.028571	0.241379	0.142857	0	0.129032	0	0.178571	0	0.222222	0.103448	0.066667	0.166667	0.131579	0.178571	0.214286	0	0.131579	0.129032	0.1	0.191489	0	0.069767	0.172414	0.030303	0.037975	0.321429	0.366667	0.324324	0.178571	0.3	0.27027	0.08	0.354839	0.081081	0.433333	0.25	0.290323	0.324324	0.212766	0.25	0.212766	0.3125	0.045455	0.075	0.277778	0
0.090909	0.095238	0.238095	0.2	0.037037	0.473684	0.142857	0.142857	0.35	0.142857	0.190476	0.16	0.388889	0.263158	0.263158	0.125	0.129032	0.315789	0.162162	0.125	0.129032	0.285714	0.315789	0.297297	0.166667	0.1875	0.368421	0.181818	0.057143	0.380952	0.5	0.366667	0.115385	0.631579	0.181818	0.121951	0.307692	0.103448	0.4	0.2	0.230769	0.366667	0.289474	0.233333	0.225	0.416667	0.055556	0.09375	0.310345	0.190476
0.12069	0.15625	0.148148	0.108108	0.03125	0.375	0.16	0.193548	0.28	0.16	0.153846	0.096774	0.304348	0.16	0.16	0.066667	0.111111	0.304348	0.230769	0.078947	0.142857	0.230769	0.153846	0.325	0.137931	0.131579	0.347826	0.148148	0.053333	0.36	0.52	0.4375	0.188679	0.384615	0.375	0.0625	0.5	0.027778	0.6	0.27027	0.37037	0.4375	0.285714	0.272727	0.227273	0.5	0.075	0.111111	0.34375	0.111111
0.138462	0.136986	0.142857	0.25	0.05	0.3125	0.117647	0.243243	0.205882	0.151515	0.181818	0.131579	0.258065	0.151515	0.151515	0.138889	0.113636	0.21875	0.1875	0.136364	0.139535	0.171429	0.181818	0.291667	0.166667	0.155556	0.25	0.111111	0.113924	0.30303	0.236842	0.25	0.142857	0.363636	0.177778	0.153846	0.2	0.121951	0.289474	0.244444	0.121951	0.27907	0.285714	0.186047	0.26	0.263158	0.130435	0.113636	0.238095	0.181818
0.166667	0.177215	0.041667	0.111111	0.019608	0.106383	0.090909	0.056604	0.0625	0	0.139535	0.039216	0.113636	0.043478	0.021277	0.108696	0.113208	0.088889	0.196429	0.090909	0.113208	0.085106	0.042553	0.285714	0.061224	0.192308	0.111111	0	0.113636	0.152174	0.23913	0.3	0.171429	0.195652	0.26	0.111111	0.234043	0.12	0.255319	0.32	0.217391	0.511628	0.303571	0.244898	0.351852	0.234043	0.033333	0.072727	0.24	0.088889
0.145455	0.16129	0.16	0.114286	0.033333	0.347826	0.173913	0.129032	0.304348	0.173913	0.217391	0.103448	0.333333	0.173913	0.173913	0.071429	0.1875	0.333333	0.243243	0.083333	0.1875	0.25	0.166667	0.307692	0.148148	0.138889	0.318182	0.16	0.040541	0.333333	0.565217	0.419355	0.196078	0.416667	0.354839	0.065217	0.48	0.029412	0.583333	0.25	0.4	0.419355	0.333333	0.333333	0.155556	0.541667	0.051282	0.151515	0.366667	0.12
0.196721	0.188406	0.114286	0.166667	0.025	0.242424	0.121212	0.125	0.176471	0.088235	0.1875	0.135135	0.225806	0.15625	0.121212	0.081081	0.142857	0.1875	0.244444	0.113636	0.142857	0.176471	0.151515	0.386364	0.138889	0.108696	0.21875	0.083333	0.048193	0.272727	0.4375	0.5	0.183333	0.333333	0.333333	0.072727	0.382353	0.097561	0.454545	0.375	0.285714	0.8	0.409091	0.282051	0.169811	0.382353	0.040816	0.090909	0.378378	0.151515
0.169811	0.183333	0.076923	0.117647	0.25	0.071429	0	0.214286	0.074074	0.083333	0	0.107143	0	0.04	0.083333	0.035714	0.233333	0	0.153846	0.085714	0.233333	0	0.08	0.086957	0.153846	0.052632	0.037037	0.076923	0.117647	0	0.029412	0.02381	0.153846	0.064516	0.051282	0.230769	0.028571	0.096774	0.027778	0.128205	0	0.02381	0.085106	0.026316	0.085106	0.028571	0.142857	0.233333	0.025641	0.125
0.181818	0.16	0.128205	0.227273	0.045455	0.277778	0.105263	0.190476	0.184211	0.135135	0.162162	0.119048	0.228571	0.135135	0.135135	0.097561	0.12766	0.194444	0.196078	0.148936	0.12766	0.153846	0.162162	0.32	0.179487	0.142857	0.222222	0.1	0.069767	0.27027	0.307692	0.404762	0.151515	0.289474	0.325581	0.142857	0.333333	0.136364	0.394737	0.304348	0.219512	0.439024	0.313725	0.195652	0.240741	0.368421	0.076923	0.104167	0.333333	0.162162
0.101695	0.088235	0.148148	0.108108	0.064516	0.375	0.16	0.233333	0.230769	0.115385	0.2	0.133333	0.363636	0.16	0.16	0.032258	0.111111	0.304348	0.142857	0.108108	0.142857	0.230769	0.153846	0.232558	0.137931	0.228571	0.347826	0.107143	0.097222	0.36	0.266667	0.352941	0.086207	0.333333	0.189189	0.108696	0.21875	0.088235	0.333333	0.175	0.15625	0.277778	0.227273	0.135135	0.285714	0.3	0.102564	0.081081	0.264706	0.153846
0.140625	0.138889	0	0.042553	0	0.108108	0.121212	0.097561	0.081081	0.088235	0.1875	0	0.117647	0.057143	0.027778	0.052632	0.090909	0.117647	0.217391	0	0.116279	0.111111	0.055556	0.244898	0.051282	0.085106	0.147059	0	0.144737	0.166667	0.314286	0.317073	0.267857	0.189189	0.3	0.134615	0.305556	0.046512	0.297297	0.410256	0.285714	0.384615	0.24	0.351351	0.148148	0.27027	0.214286	0.116279	0.275	0
0.095238	0.114286	0.09375	0.071429	0.027778	0.233333	0.137931	0.138889	0.2	0.222222	0.133333	0.085714	0.214286	0.137931	0.137931	0.028571	0.128205	0.214286	0.130435	0.071429	0.128205	0.2	0.133333	0.163265	0.193548	0.175	0.25	0.09375	0.152778	0.266667	0.3125	0.25	0.218182	0.290323	0.142857	0.170213	0.264706	0.025	0.257143	0.243902	0.205882	0.25	0.183673	0.210526	0.115385	0.228571	0.205128	0.189189	0.205128	0.096774
0.101695	0.104478	0.148148	0.108108	0.03125	0.32	0.16	0.193548	0.230769	0.208333	0.153846	0.096774	0.25	0.115385	0.115385	0.066667	0.142857	0.2	0.142857	0.078947	0.176471	0.185185	0.153846	0.204545	0.222222	0.162162	0.24	0.107143	0.097222	0.259259	0.310345	0.243243	0.145455	0.44	0.128205	0.133333	0.21875	0.057143	0.290323	0.205128	0.193548	0.243243	0.2	0.166667	0.173913	0.21875	0.131579	0.142857	0.433333	0.111111
0.107143	0.145161	0.076923	0.055556	0	0.153846	0.238095	0.096774	0.26087	0.083333	0.125	0.068966	0.125	0.181818	0.130435	0.115385	0.193548	0.173913	0.25	0.055556	0.233333	0.26087	0.173913	0.219512	0.071429	0.111111	0.166667	0.076923	0.085714	0.192308	0.296296	0.228571	0.153846	0.222222	0.205882	0.066667	0.241379	0.096774	0.233333	0.1	0.214286	0.264706	0.214286	0.258065	0.186047	0.241379	0.081081	0.121212	0.37931	0.08
0.118644	0.171875	0.066667	0.105263	0.0625	0.133333	0.153846	0.266667	0.1	0.034483	0.148148	0.060606	0.148148	0.071429	0.034483	0.064516	0.138889	0.148148	0.25641	0.105263	0.171429	0.137931	0.107143	0.2	0.133333	0.047619	0.185185	0	0.126761	0.206897	0.258065	0.236842	0.163636	0.233333	0.153846	0.130435	0.176471	0.151515	0.171429	0.2	0.1875	0.236842	0.195652	0.228571	0.27907	0.212121	0.128205	0.171429	0.189189	0.148148
0.189655	0.181818	0.129032	0.097561	0.027778	0.275862	0.137931	0.108108	0.2	0.1	0.133333	0.117647	0.259259	0.178571	0.137931	0.058824	0.189189	0.214286	0.268293	0.097561	0.189189	0.2	0.172414	0.357143	0.121212	0.119048	0.25	0.09375	0.077922	0.266667	0.5	0.515152	0.218182	0.37931	0.297297	0.057692	0.387097	0.078947	0.419355	0.342105	0.366667	0.612903	0.348837	0.352941	0.137255	0.387097	0.044444	0.128205	0.382353	0.133333
0.265625	0.267606	0.021739	0.055556	0.113636	0.139535	0.097561	0.12766	0.090909	0.071429	0.15	0.020408	0.121951	0.071429	0.071429	0.066667	0.272727	0.095238	0.28	0	0.272727	0.090909	0.069767	0.189655	0.042553	0.092593	0.146341	0.044444	0.202532	0.162791	0.173913	0.192308	0.338983	0.130435	0.25	0.175439	0.195652	0.039216	0.191489	0.211538	0.204545	0.24	0.206897	0.208333	0.206897	0.195652	0.18	0.244444	0.18	0.022222
0.121495	0.141593	0.088608	0.156627	0.023256	0.113924	0.05	0.082353	0.074074	0.063291	0.089744	0.1125	0.103896	0.063291	0.05	0.060976	0.067416	0.089744	0.131868	0.185185	0.067416	0.074074	0.075949	0.227273	0.1	0.139535	0.102564	0.075	0.089431	0.126582	0.177215	0.202381	0.134615	0.151899	0.164706	0.139785	0.160494	0.082353	0.202532	0.259259	0.121951	0.294872	0.238636	0.141176	0.197802	0.175	0.065217	0.067416	0.166667	0.075949
0.2	0.153846	0	0.076923	0.030303	0.172414	0.153846	0.027027	0.137931	0	0.24	0.029412	0.192308	0.034483	0.071429	0.03125	0.171429	0.148148	0.195122	0	0.171429	0.1	0.033333	0.255814	0	0.023256	0.230769	0.032258	0.025641	0.206897	0.258065	0.27027	0.163636	0.15625	0.875	0.04	0.290323	0.027027	0.366667	0.263158	0.357143	0.342857	0.27907	0.264706	0.122449	0.333333	0.023256	0.108108	0.294118	0
0.173913	0.086207	0.052632	0.071429	0.047619	0.375	0.2	0	0.235294	0	0.583333	0.045455	0.357143	0.058824	0.125	0	0.208333	0.266667	0.121212	0	0.16	0.105263	0.055556	0.166667	0	0	0.538462	0.052632	0.014925	0.352941	0.227273	0.166667	0.106383	0.190476	0.269231	0.025641	0.272727	0	0.318182	0.241379	0.181818	0.206897	0.162162	0.192308	0.162162	0.272727	0	0.115385	0.230769	0.055556
0.151515	0.103896	0.02439	0.061224	0.128205	0.023256	0.025641	0.142857	0.02381	0.081081	0.051282	0.046512	0	0.052632	0.052632	0.131579	0.133333	0	0.113208	0.019608	0.159091	0.02381	0.051282	0.04918	0.073171	0.148936	0.02439	0.05	0.232877	0.022727	0.042553	0.096154	0.193548	0.093023	0.078431	0.265306	0.06383	0.090909	0.0625	0.16	0.043478	0.096154	0.048387	0.081633	0.140351	0.041667	0.384615	0.243902	0.08	0.025
0.178571	0.209677	0.142857	0.135135	0.030303	0.307692	0.2	0.117647	0.269231	0.111111	0.192308	0.09375	0.291667	0.304348	0.25	0.1	0.171429	0.291667	0.289474	0.076923	0.171429	0.269231	0.24	0.384615	0.096774	0.128205	0.28	0.142857	0.052632	0.296296	0.5	0.424242	0.230769	0.37037	0.285714	0.04	0.428571	0.055556	0.366667	0.2	0.310345	0.424242	0.375	0.433333	0.195652	0.428571	0.073171	0.108108	0.333333	0.148148
0.12069	0.104478	0	0	0	0.178571	0.16	0.057143	0.103448	0.16	0.2	0	0.2	0	0	0.032258	0.142857	0.2	0.116279	0	0.142857	0.103448	0	0.152174	0.064516	0.075	0.192308	0	0.067568	0.172414	0.225806	0.277778	0.166667	0.125	0.257143	0.108696	0.3	0	0.212121	0.342857	0.233333	0.210526	0.148936	0.2	0.102041	0.21875	0.102564	0.176471	0.162162	0
0.142857	0.140625	0.034483	0.052632	0.032258	0.185185	0.166667	0.16129	0.148148	0.076923	0.26087	0	0.16	0.037037	0.037037	0.033333	0.147059	0.16	0.175	0	0.147059	0.148148	0.035714	0.181818	0.066667	0.05	0.2	0	0.083333	0.178571	0.193548	0.184211	0.127273	0.166667	0.194444	0.041667	0.225806	0	0.181818	0.243243	0.2	0.216216	0.152174	0.171429	0.152174	0.151515	0.105263	0.181818	0.166667	0.035714
0.10687	0.092199	0.04717	0.070796	0.046296	0.027273	0	0.063636	0.027523	0.028302	0	0.055556	0.018519	0.028302	0.038095	0.009009	0.061947	0.018519	0.04918	0.061404	0.061947	0.018182	0.037736	0.055556	0.046296	0.025	0.027778	0.057143	0.12766	0.027027	0.035088	0.05	0.162602	0.035714	0.042017	0.082645	0.025862	0.035398	0.025641	0.024194	0.026316	0.041322	0.063492	0.042735	0.030769	0.034783	0.033613	0.071429	0.060345	0.047619
0.188889	0.247312	0.073529	0.106667	0.071429	0.119403	0.059701	0.097222	0.088235	0.075758	0.058824	0.101449	0.107692	0.044118	0.059701	0.042254	0.138889	0.090909	0.2	0.106667	0.138889	0.072464	0.058824	0.233766	0.086957	0.103896	0.123077	0.089552	0.09009	0.117647	0.142857	0.205479	0.153846	0.130435	0.178082	0.148148	0.208955	0.053333	0.171429	0.308824	0.144928	0.222222	0.230769	0.135135	0.156627	0.191176	0.049383	0.123288	0.214286	0.074627
0.175439	0.169231	0	0.075	0.029412	0.166667	0.148148	0.026316	0.133333	0	0.230769	0.028571	0.185185	0.033333	0.068966	0.0625	0.166667	0.142857	0.219512	0	0.166667	0.133333	0.032258	0.25	0	0.022727	0.222222	0.03125	0.025316	0.2	0.212121	0.297297	0.181818	0.151515	0.769231	0.039216	0.322581	0.026316	0.3125	0.289474	0.344828	0.333333	0.244444	0.257143	0.12	0.28125	0.022727	0.105263	0.285714	0
0.271429	0.240506	0.037736	0.065574	0.117647	0.096154	0.081633	0.12963	0.076923	0.081633	0.125	0.035714	0.08	0.06	0.06	0.037037	0.185185	0.08	0.220339	0.015625	0.185185	0.076923	0.058824	0.166667	0.075472	0.080645	0.1	0.037736	0.271605	0.115385	0.169811	0.166667	0.380952	0.111111	0.192982	0.229508	0.145455	0.051724	0.142857	0.20339	0.173077	0.206897	0.181818	0.2	0.181818	0.145455	0.175439	0.207547	0.135593	0.038462
0.153846	0.131148	0.130435	0.090909	0.076923	0.272727	0.2	0.103448	0.227273	0.043478	0.25	0.035714	0.190476	0.142857	0.142857	0.125	0.206897	0.190476	0.194444	0.058824	0.166667	0.125	0.190476	0.2	0.12	0.055556	0.238095	0.04	0.042254	0.26087	0.32	0.242424	0.183673	0.291667	0.21875	0.121951	0.259259	0.066667	0.206897	0.235294	0.28	0.28125	0.195122	0.275862	0.225	0.214286	0.055556	0.166667	0.225806	0.136364
0.142857	0.125	0.151515	0.297297	0.052632	0.37931	0.090909	0.189189	0.258065	0.2	0.193548	0.138889	0.275862	0.2	0.16129	0.083333	0.119048	0.233333	0.145833	0.116279	0.119048	0.147059	0.193548	0.276596	0.212121	0.190476	0.266667	0.117647	0.088608	0.28125	0.25	0.232558	0.147541	0.387097	0.214286	0.16	0.179487	0.1	0.305556	0.255814	0.128205	0.292683	0.297872	0.166667	0.196078	0.277778	0.111111	0.146341	0.25	0.15625
0.446809	0.375	0.0625	0.047619	0.125	0.090909	0.103448	0.111111	0.129032	0.032258	0.137931	0.057143	0.064516	0.032258	0.066667	0.09375	0.653846	0.1	0.243902	0.023256	0.535714	0.09375	0.064516	0.166667	0.058824	0	0.096774	0.0625	0.078947	0.088235	0.108108	0.139535	0.2	0.083333	0.146341	0.102041	0.2	0.025641	0.102564	0.162791	0.176471	0.139535	0.1875	0.184211	0.075472	0.135135	0.069767	0.387097	0.121951	0.064516
0.22619	0.204301	0.014706	0.012821	0.075758	0.075758	0.063492	0.102941	0.044776	0.046875	0.0625	0.028571	0.0625	0.030769	0.030769	0.076923	0.164179	0.0625	0.194444	0.025974	0.164179	0.060606	0.046154	0.123457	0.059701	0.094595	0.095238	0.029851	0.329545	0.107692	0.117647	0.150685	0.328947	0.121212	0.15493	0.219178	0.149254	0.086957	0.114286	0.164384	0.153846	0.150685	0.135802	0.176471	0.194805	0.132353	0.140845	0.164179	0.109589	0.014925
0.168421	0.25	0.069444	0.101266	0.067568	0.112676	0.056338	0.050633	0.083333	0.027397	0.055556	0.09589	0.101449	0.071429	0.071429	0.098592	0.116883	0.085714	0.220779	0.101266	0.102564	0.068493	0.070423	0.222222	0.053333	0.141026	0.1	0.084507	0.126126	0.09589	0.166667	0.243243	0.135417	0.15493	0.168831	0.127907	0.180556	0.077922	0.178082	0.223684	0.152778	0.226667	0.25	0.157895	0.190476	0.148649	0.022989	0.075	0.219178	0.070423
0.144928	0.113924	0.071429	0.145833	0.021739	0.175	0.102564	0.0625	0.121951	0.04878	0.157895	0.066667	0.157895	0.102564	0.075	0.069767	0.102041	0.157895	0.169811	0.057692	0.102041	0.121951	0.1	0.240741	0.068182	0.096154	0.184211	0.046512	0.056818	0.230769	0.3	0.395349	0.166667	0.282051	0.318182	0.065574	0.261905	0.085106	0.35	0.270833	0.243902	0.395349	0.259259	0.217391	0.172414	0.292683	0.036364	0.08	0.461538	0.073171
0.213115	0.202899	0.081081	0.06383	0.105263	0.166667	0.117647	0.121951	0.108108	0.027027	0.114286	0.04878	0.147059	0.027027	0.055556	0.051282	0.195122	0.114286	0.23913	0.041667	0.195122	0.108108	0.054054	0.291667	0.076923	0	0.142857	0.081081	0.08642	0.102564	0.236842	0.309524	0.2	0.184211	0.232558	0.090909	0.333333	0.022222	0.25641	0.435897	0.210526	0.341463	0.26	0.186047	0.166667	0.170732	0.061224	0.139535	0.238095	0.054054
0.22	0.186441	0.038462	0.027778	0.074074	0.16	0.086957	0.03125	0.166667	0	0.181818	0.111111	0.130435	0	0.041667	0.076923	0.16129	0.181818	0.1	0.027778	0.16129	0.037037	0.04	0.088889	0.035714	0	0.173913	0.038462	0.041667	0.111111	0.096774	0.105263	0.053571	0.142857	0.111111	0.068182	0.129032	0.03125	0.090909	0.131579	0.1	0.105263	0.086957	0.117647	0.086957	0.09375	0	0.125	0.147059	0.04
0.2	0.173913	0.055556	0.066667	0.052632	0.176471	0.125	0.128205	0.114286	0.125	0.15625	0.051282	0.193548	0.028571	0.028571	0.054054	0.175	0.15625	0.222222	0.066667	0.175	0.114286	0.057143	0.25	0.176471	0.086957	0.151515	0	0.075	0.171429	0.25	0.394737	0.206897	0.194444	0.378378	0.115385	0.314286	0.073171	0.342857	0.384615	0.294118	0.394737	0.244898	0.25641	0.173077	0.277778	0.086957	0.175	0.282051	0.088235
0.155172	0.151515	0.03125	0.02381	0.029412	0.166667	0.148148	0.054054	0.133333	0.148148	0.185185	0	0.142857	0.068966	0.068966	0.0625	0.2	0.142857	0.190476	0	0.166667	0.133333	0.066667	0.195652	0.09375	0.097561	0.178571	0	0.094595	0.2	0.25	0.263158	0.203704	0.1875	0.277778	0.104167	0.28125	0.026316	0.2	0.289474	0.258065	0.230769	0.191489	0.257143	0.12	0.242424	0.125	0.2	0.184211	0.032258
0.209677	0.253731	0.051282	0.0625	0.02381	0.102564	0.114286	0.093023	0.105263	0.054054	0.111111	0.047619	0.111111	0.026316	0.026316	0.05	0.219512	0.111111	0.26087	0.040816	0.190476	0.105263	0.052632	0.26	0.131579	0.06	0.138889	0	0.098765	0.157895	0.263158	0.272727	0.258621	0.15	0.285714	0.150943	0.289474	0.068182	0.219512	0.461538	0.27027	0.333333	0.28	0.3	0.163636	0.25641	0.104167	0.190476	0.204545	0.081081
0.130435	0.101266	0.047619	0.2	0.045455	0.15	0.076923	0.111111	0.097561	0.105263	0.131579	0.044444	0.131579	0.05	0.05	0.046512	0.12766	0.102564	0.12963	0.058824	0.12766	0.071429	0.075	0.2	0.121951	0.098039	0.1	0.023256	0.135802	0.175	0.159091	0.156863	0.151515	0.195122	0.163265	0.185185	0.106383	0.111111	0.152174	0.276596	0.136364	0.18	0.196429	0.122449	0.135593	0.130435	0.166667	0.152174	0.191489	0.075
0.142857	0.206897	0.016393	0.028571	0.015873	0.084746	0.071429	0.030303	0.067797	0	0.070175	0.031746	0.070175	0.034483	0.016949	0.067797	0.109375	0.070175	0.19697	0.028571	0.109375	0.067797	0.033898	0.2	0.032258	0.072464	0.087719	0	0.134021	0.101695	0.189655	0.241935	0.189873	0.135593	0.209677	0.078947	0.186441	0.0625	0.163934	0.164179	0.192982	0.262295	0.214286	0.258621	0.180556	0.166667	0.027778	0.075758	0.233333	0.033898
0.196721	0.205882	0	0	0.025	0.138889	0.15625	0.125	0.081081	0.088235	0.117647	0	0.151515	0.027778	0.027778	0.025641	0.170732	0.117647	0.244444	0	0.170732	0.142857	0.027027	0.22	0.051282	0.0625	0.181818	0	0.115385	0.2	0.243243	0.255814	0.314815	0.157895	0.333333	0.113208	0.305556	0.022727	0.297297	0.27907	0.285714	0.317073	0.192308	0.25	0.169811	0.305556	0.159091	0.170732	0.214286	0
0.142857	0.196721	0.071429	0.052632	0.066667	0.066667	0.217391	0.090909	0.107143	0	0.115385	0.064516	0.074074	0.076923	0.076923	0.148148	0.258065	0.115385	0.342857	0.052632	0.3	0.192308	0.074074	0.209302	0.066667	0.135135	0.111111	0.034483	0.130435	0.137931	0.193548	0.184211	0.169811	0.206897	0.228571	0.136364	0.1875	0.125	0.147059	0.15	0.2	0.184211	0.204545	0.28125	0.292683	0.1875	0.076923	0.181818	0.2	0.074074
0.163636	0.196721	0	0	0	0.142857	0.217391	0.028571	0.148148	0	0.16	0	0.16	0.037037	0.037037	0.068966	0.181818	0.16	0.27027	0	0.21875	0.192308	0.035714	0.268293	0	0.02439	0.2	0	0.026316	0.222222	0.275862	0.323529	0.169811	0.206897	0.34375	0.020408	0.357143	0.028571	0.3	0.243243	0.384615	0.323529	0.204545	0.28125	0.152174	0.357143	0.05	0.083333	0.235294	0
0.153846	0.131148	0.04	0.028571	0	0.272727	0.2	0.032258	0.173913	0.142857	0.25	0	0.25	0.043478	0.043478	0.038462	0.206897	0.190476	0.194444	0	0.166667	0.125	0.041667	0.2	0.076923	0.085714	0.3	0	0.057143	0.26087	0.222222	0.205882	0.16	0.148148	0.258065	0.069767	0.307692	0	0.25	0.272727	0.28	0.242424	0.195122	0.233333	0.139535	0.307692	0.085714	0.166667	0.1875	0.041667
0.177419	0.171429	0.083333	0.113636	0.025	0.205882	0.121212	0.071429	0.142857	0.057143	0.1875	0.076923	0.1875	0.121212	0.088235	0.081081	0.116279	0.151515	0.244444	0.065217	0.116279	0.142857	0.117647	0.355556	0.078947	0.085106	0.181818	0.054054	0.060976	0.2	0.393939	0.459459	0.183333	0.294118	0.333333	0.053571	0.342857	0.071429	0.411765	0.375	0.285714	0.8	0.377778	0.282051	0.148148	0.342857	0.040816	0.090909	0.545455	0.085714
0.238095	0.225352	0.222222	0.255814	0.045455	0.243243	0.105263	0.111111	0.216216	0.076923	0.162162	0.175	0.194444	0.135135	0.135135	0.046512	0.177778	0.194444	0.297872	0.173913	0.152174	0.153846	0.162162	0.736842	0.121951	0.076923	0.189189	0.157895	0.033708	0.205128	0.275	0.311111	0.134328	0.25641	0.266667	0.066667	0.268293	0.06383	0.325	0.276596	0.219512	0.404762	0.914286	0.27907	0.155172	0.3	0.018182	0.104167	0.365854	0.162162
0.2	0.225352	0.047619	0.125	0.121951	0.121951	0.105263	0.111111	0.071429	0	0.102564	0.068182	0.102564	0	0.02439	0.022727	0.204545	0.102564	0.270833	0.102041	0.204545	0.097561	0.02381	0.245283	0.069767	0	0.128205	0.047619	0.095238	0.093023	0.159091	0.204082	0.169231	0.113636	0.212766	0.084746	0.238095	0.086957	0.152174	0.22449	0.219512	0.229167	0.218182	0.170213	0.288462	0.209302	0.037037	0.152174	0.166667	0.102564
0.1875	0.231884	0.02439	0.04	0.157895	0.1	0.142857	0.090909	0.075	0.052632	0.108108	0.071429	0.108108	0.052632	0.052632	0.102564	0.214286	0.108108	0.340909	0.061224	0.214286	0.131579	0.078947	0.230769	0.073171	0.102041	0.135135	0.05	0.139241	0.153846	0.225	0.266667	0.321429	0.205128	0.25	0.148148	0.25	0.116279	0.186047	0.288889	0.263158	0.295455	0.25	0.292683	0.181818	0.219512	0.148936	0.186047	0.227273	0.051282
0.137931	0.153846	0	0	0.0625	0.096774	0.153846	0.055556	0.064516	0.111111	0.107143	0.029412	0.107143	0.071429	0.071429	0.1	0.205882	0.107143	0.166667	0	0.205882	0.1	0.068966	0.08	0.0625	0.128205	0.142857	0.032258	0.15942	0.166667	0.258065	0.175	0.230769	0.193548	0.153846	0.209302	0.212121	0.055556	0.138889	0.263158	0.225806	0.236842	0.1	0.194444	0.122449	0.176471	0.257143	0.322581	0.157895	0
0.057692	0.084746	0.235294	0.148148	0.15	0.15	0	0.173913	0.157895	0.117647	0	0.263158	0.111111	0.266667	0.266667	0.157895	0.071429	0.111111	0.151515	0.148148	0.071429	0.1	0.25	0.102564	0.210526	0.178571	0.166667	0.235294	0.095238	0.142857	0.166667	0.16129	0.081633	0.3	0.0625	0.171429	0.115385	0.173913	0.111111	0.088235	0.038462	0.16129	0.128205	0.142857	0.157895	0.16	0.064516	0.071429	0.222222	0.25
0.090909	0.131148	0.083333	0.125	0.037037	0.037037	0	0.103448	0.038462	0	0	0.074074	0	0.090909	0.043478	0.421053	0.029412	0	0.102564	0.125	0.029412	0	0.136364	0.066667	0.12	0.151515	0	0	0.088235	0.035714	0.064516	0.108108	0.054545	0.148148	0.026316	0.15	0.030303	0.230769	0.029412	0.076923	0.032258	0.108108	0.088889	0.121212	0.166667	0.0625	0.055556	0.029412	0.085714	0.136364
0.078125	0.098592	0.296296	0.363636	0.057143	0.193548	0	0.242424	0.2	0.137931	0.0625	0.1875	0.096774	0.269231	0.222222	0.090909	0.073171	0.096774	0.106383	0.25	0.047619	0.090909	0.259259	0.23913	0.233333	0.236842	0.09375	0.206897	0.106667	0.117647	0.135135	0.136364	0.063492	0.212121	0.090909	0.170213	0.075	0.138889	0.157895	0.133333	0.025	0.162791	0.26087	0.095238	0.183673	0.162162	0.093023	0.073171	0.205128	0.259259
0.272727	0.256757	0.041667	0.071429	0.130435	0.106383	0.090909	0.142857	0.085106	0.066667	0.139535	0.039216	0.088889	0.066667	0.066667	0.0625	0.255319	0.088889	0.264151	0.016949	0.229167	0.085106	0.065217	0.180328	0.061224	0.087719	0.111111	0.041667	0.225	0.12766	0.1875	0.181818	0.344262	0.122449	0.211538	0.186441	0.183673	0.056604	0.156863	0.2	0.191489	0.226415	0.196721	0.22	0.196721	0.16	0.169811	0.229167	0.148148	0.042553
0.153846	0.207317	0.142857	0.178571	0.035714	0.137255	0.102041	0.148148	0.14	0.102041	0.078431	0.282609	0.122449	0.102041	0.102041	0.075472	0.140351	0.122449	0.258621	0.269231	0.160714	0.163265	0.122449	0.344828	0.16	0.152542	0.142857	0.142857	0.130435	0.156863	0.235294	0.267857	0.205479	0.22	0.210526	0.169231	0.207547	0.107143	0.181818	0.241379	0.169811	0.267857	0.316667	0.218182	0.179104	0.185185	0.114754	0.140351	0.192982	0.122449
0.150442	0.177966	0.054945	0.12766	0.053763	0.101124	0.044444	0.051546	0.065934	0.021739	0.067416	0.076087	0.091954	0.05618	0.05618	0.077778	0.082474	0.079545	0.164948	0.104167	0.082474	0.054348	0.055556	0.191919	0.053763	0.058824	0.090909	0.066667	0.066667	0.087912	0.131868	0.180851	0.122807	0.134831	0.172043	0.084112	0.155556	0.040816	0.166667	0.191489	0.108696	0.180851	0.20202	0.114583	0.166667	0.155556	0.018868	0.060606	0.186813	0.067416
0.034483	0.029851	0.083333	0.058824	0	0.076923	0	0.066667	0.08	0.090909	0	0.074074	0.086957	0.090909	0.090909	0.08	0	0.086957	0	0.058824	0	0.08	0.086957	0.043478	0.076923	0.055556	0.083333	0.083333	0.013699	0.074074	0.064516	0.051282	0	0.068966	0	0	0.0625	0	0.060606	0	0	0.051282	0.042553	0	0	0.0625	0	0	0.1875	0.086957
0.112903	0.098592	0	0.046512	0.088235	0	0.03125	0.171429	0	0.1	0.0625	0.027027	0	0.064516	0.064516	0.125	0.1	0	0.083333	0	0.128205	0.028571	0.0625	0.055556	0.088235	0.205128	0.029412	0.029412	0.257576	0.027027	0.05	0.06383	0.218182	0.081081	0.090909	0.341463	0.02381	0.108108	0.073171	0.159091	0.025	0.086957	0.054545	0.069767	0.137255	0.04878	0.46875	0.222222	0.093023	0
0.140351	0.121212	0.107143	0.078947	0.03125	0.375	0.16	0.057143	0.230769	0.074074	0.2	0.0625	0.304348	0.115385	0.115385	0.103448	0.142857	0.25	0.170732	0.051282	0.142857	0.185185	0.111111	0.232558	0.064516	0.075	0.291667	0.107143	0.025974	0.307692	0.461538	0.393939	0.145455	0.333333	0.294118	0.040816	0.5	0.027778	0.6	0.27027	0.321429	0.393939	0.255814	0.2	0.148936	0.444444	0.02381	0.081081	0.535714	0.071429
0.08	0.067797	0.538462	0.363636	0.1	0.375	0	0.3	0.4	0.2	0.055556	0.277778	0.1875	0.384615	0.384615	0.05	0.074074	0.1875	0.088235	0.25	0.035714	0.166667	0.461538	0.2	0.375	0.103448	0.176471	0.25	0.014925	0.15	0.173913	0.09375	0	0.25	0	0.111111	0.12	0.083333	0.16	0.090909	0	0.09375	0.194444	0.107143	0.102564	0.12	0	0.035714	0.066667	0.727273
0	0	0.5	0.272727	0	0.176471	0	0.142857	0.1875	0.230769	0	0.4	0.214286	0.230769	0.230769	0	0	0.214286	0	0.272727	0	0.1875	0.214286	0.176471	0.176471	0.153846	0.2	0.5	0.015385	0.166667	0.136364	0.137931	0	0.15	0	0.055556	0.130435	0	0.125	0	0	0.1	0.171429	0	0.025	0.130435	0	0	0.071429	0.214286
0.032258	0.057971	0.2	0.212121	0.032258	0.142857	0	0.241379	0.148148	0.12	0	0.178571	0.115385	0.166667	0.166667	0.033333	0.026316	0.115385	0.068182	0.290323	0.026316	0.107143	0.208333	0.130435	0.28	0.166667	0.111111	0.111111	0.04	0.137931	0.121212	0.153846	0.016393	0.166667	0.02381	0.136364	0.085714	0.16129	0.114286	0.069767	0.028571	0.125	0.152174	0.051282	0.292683	0.117647	0.02439	0.026316	0.105263	0.380952
0.125	0.208955	0	0.043478	0	0.142857	0.125	0	0.083333	0	0.121212	0	0.15625	0.058824	0.028571	0.054054	0.119048	0.121212	0.222222	0	0.119048	0.083333	0.057143	0.25	0	0.041667	0.1875	0	0.036145	0.205882	0.285714	0.292683	0.186441	0.162162	0.457143	0.035714	0.277778	0.047619	0.305556	0.148936	0.333333	0.325	0.270833	0.361111	0.150943	0.352941	0.041667	0.068182	0.219512	0
0.133333	0.149254	0.133333	0.1	0.028571	0.241379	0.142857	0.111111	0.206897	0.103448	0.137931	0.121212	0.269231	0.185185	0.142857	0.09375	0.162162	0.269231	0.214286	0.128205	0.162162	0.206897	0.178571	0.244444	0.125	0.15	0.259259	0.096774	0.064935	0.275862	0.464286	0.4	0.178571	0.3	0.236842	0.08	0.4	0.142857	0.387097	0.219512	0.290323	0.441176	0.266667	0.285714	0.1875	0.4	0.045455	0.102564	0.314286	0.137931
0.177419	0.205882	0.114286	0.113636	0.025	0.242424	0.15625	0.184211	0.176471	0.088235	0.117647	0.135135	0.225806	0.088235	0.088235	0.025641	0.142857	0.225806	0.244444	0.113636	0.170732	0.212121	0.117647	0.326087	0.138889	0.0625	0.258065	0.083333	0.023529	0.235294	0.314286	0.384615	0.145161	0.222222	0.3	0.035088	0.382353	0.046512	0.371429	0.27907	0.25	0.421053	0.291667	0.219512	0.169811	0.342857	0.02	0.090909	0.275	0.151515
0.192308	0.1875	0	0.06383	0.069767	0.045455	0.047619	0.032258	0.034091	0.011494	0.072289	0.01087	0.047059	0.023256	0.023256	0.045977	0.125	0.047059	0.150538	0	0.125	0.045977	0.022989	0.131313	0.010989	0.0625	0.058824	0.022727	0.169492	0.081395	0.114943	0.117021	0.244898	0.079545	0.144444	0.1	0.113636	0.043478	0.11236	0.104167	0.142857	0.141304	0.141414	0.134831	0.097087	0.101124	0.085106	0.1	0.120879	0
0.075472	0.118644	0	0	0.041667	0.25	0.235294	0.074074	0.142857	0	0.222222	0	0.294118	0.05	0.05	0.043478	0.103448	0.222222	0.212121	0	0.142857	0.2	0.047619	0.125	0	0.060606	0.352941	0	0.075758	0.368421	0.25	0.225806	0.1	0.217391	0.241379	0.02381	0.192308	0.035714	0.230769	0.114286	0.208333	0.1875	0.121951	0.172414	0.352941	0.291667	0.129032	0.142857	0.166667	0
0.145455	0.142857	0.115385	0.114286	0	0.347826	0.173913	0.09375	0.25	0.125	0.166667	0.103448	0.4	0.173913	0.173913	0.071429	0.151515	0.333333	0.210526	0.083333	0.151515	0.25	0.166667	0.307692	0.107143	0.108108	0.45	0.115385	0.013158	0.454545	0.44	0.419355	0.173077	0.307692	0.354839	0.020833	0.681818	0.029412	0.52	0.285714	0.346154	0.419355	0.3	0.25	0.155556	0.761905	0.025	0.085714	0.322581	0.12
0.116667	0.151515	0.064516	0.131579	0.09375	0.206897	0.107143	0.083333	0.133333	0	0.142857	0.090909	0.185185	0.107143	0.107143	0.214286	0.135135	0.142857	0.219512	0.131579	0.135135	0.096774	0.103448	0.222222	0.09375	0.097561	0.178571	0.064516	0.125	0.16129	0.25	0.230769	0.160714	0.357143	0.179487	0.152174	0.171429	0.114286	0.2	0.225	0.181818	0.230769	0.244444	0.222222	0.365854	0.205882	0.046512	0.105263	0.216216	0.103448
0.148148	0.126984	0.166667	0.117647	0.034483	0.5	0.181818	0.096774	0.318182	0.130435	0.227273	0.107143	0.421053	0.181818	0.181818	0.074074	0.121212	0.35	0.153846	0.085714	0.121212	0.26087	0.173913	0.282051	0.111111	0.111111	0.4	0.166667	0.027027	0.409091	0.666667	0.482759	0.153846	0.434783	0.322581	0.043478	0.5	0.030303	0.85	0.257143	0.36	0.482759	0.307692	0.21875	0.159091	0.636364	0.025641	0.057143	0.37931	0.125
0.166667	0.142857	0.16	0.181818	0.033333	0.347826	0.173913	0.129032	0.25	0.125	0.272727	0.142857	0.333333	0.227273	0.173913	0.071429	0.151515	0.272727	0.210526	0.114286	0.151515	0.25	0.217391	0.342105	0.148148	0.138889	0.318182	0.115385	0.040541	0.333333	0.5	0.466667	0.150943	0.416667	0.3125	0.065217	0.423077	0.09375	0.583333	0.323529	0.296296	0.517241	0.368421	0.290323	0.155556	0.48	0.051282	0.085714	0.782609	0.166667
0.132353	0.178082	0.04878	0.081633	0.022727	0.125	0.108108	0.065217	0.1	0	0.105263	0.045455	0.105263	0.078947	0.051282	0.128205	0.106383	0.105263	0.25	0.104167	0.106383	0.1	0.076923	0.226415	0.071429	0.1	0.131579	0.02381	0.1375	0.15	0.282051	0.318182	0.229508	0.230769	0.217391	0.125	0.275	0.113636	0.238095	0.282609	0.25641	0.318182	0.245283	0.384615	0.346939	0.243902	0.037736	0.083333	0.25	0.105263
0.215686	0.20339	0.076923	0.055556	0.153846	0.153846	0.238095	0.133333	0.16	0.04	0.173913	0.068966	0.125	0.04	0.083333	0.035714	0.48	0.125	0.216216	0.027027	0.423077	0.16	0.08	0.136364	0.071429	0.025641	0.166667	0.076923	0.085714	0.107143	0.129032	0.162162	0.176471	0.137931	0.138889	0.116279	0.241379	0.030303	0.121212	0.222222	0.172414	0.162162	0.133333	0.181818	0.108696	0.125	0.111111	0.37037	0.142857	0.08
0.137931	0.153846	0.032258	0.05	0.030303	0.172414	0.153846	0.055556	0.137931	0	0.192308	0.060606	0.192308	0.071429	0.034483	0.137931	0.171429	0.192308	0.195122	0.076923	0.171429	0.1	0.068966	0.173913	0.0625	0.157895	0.230769	0	0.081081	0.25	0.3	0.305556	0.163636	0.321429	0.25	0.155556	0.25	0.151515	0.28125	0.2	0.266667	0.27027	0.222222	0.30303	0.309524	0.333333	0.047619	0.108108	0.294118	0.068966
0.138462	0.152778	0.081081	0.086957	0.05	0.235294	0.117647	0.121951	0.171429	0.151515	0.114286	0.102564	0.258065	0.151515	0.151515	0.108108	0.139535	0.21875	0.1875	0.06383	0.139535	0.171429	0.147059	0.24	0.135135	0.238095	0.333333	0.111111	0.1	0.34375	0.382353	0.375	0.263158	0.323529	0.292683	0.176471	0.454545	0.095238	0.4	0.302326	0.277778	0.375	0.26	0.275	0.188679	0.411765	0.130435	0.139535	0.3	0.083333
0.153846	0.15	0.083333	0.058824	0.037037	0.217391	0.2	0.066667	0.173913	0	0.25	0.035714	0.190476	0.090909	0.090909	0.038462	0.206897	0.190476	0.228571	0.028571	0.166667	0.173913	0.136364	0.2	0.037037	0.027027	0.238095	0	0.027778	0.26087	0.375	0.322581	0.137255	0.24	0.3	0.022222	0.259259	0.066667	0.25	0.2	0.28	0.28125	0.195122	0.321429	0.139535	0.259259	0.027027	0.129032	0.225806	0.086957
0.169811	0.126984	0	0	0.034483	0.2	0.181818	0.0625	0.115385	0.181818	0.173913	0	0.227273	0	0	0.035714	0.233333	0.173913	0.153846	0	0.233333	0.115385	0	0.219512	0.111111	0.081081	0.166667	0	0.055556	0.148148	0.25	0.30303	0.176471	0.222222	0.205882	0.066667	0.333333	0	0.275862	0.375	0.259259	0.264706	0.214286	0.21875	0.085106	0.241379	0.081081	0.193548	0.290323	0
0.107143	0.092308	0.037037	0.085714	0.034483	0.25	0.130435	0	0.16	0	0.227273	0	0.227273	0.181818	0.130435	0.16	0.121212	0.173913	0.125	0	0.088235	0.115385	0.125	0.219512	0	0.111111	0.166667	0.037037	0.041096	0.192308	0.25	0.264706	0.111111	0.375	0.171429	0.043478	0.241379	0.133333	0.233333	0.222222	0.214286	0.264706	0.214286	0.258065	0.186047	0.241379	0.052632	0.057143	0.212121	0.038462
0.171875	0.235294	0.051282	0.040816	0.04878	0.162162	0.114286	0.044444	0.105263	0	0.111111	0.073171	0.142857	0.054054	0.054054	0.076923	0.162791	0.111111	0.26087	0.02	0.162791	0.105263	0.052632	0.26	0.02381	0.019231	0.138889	0.051282	0.034884	0.157895	0.230769	0.365854	0.177419	0.210526	0.285714	0.070175	0.361111	0.044444	0.282051	0.325581	0.27027	0.365854	0.28	0.268293	0.142857	0.25641	0.019231	0.111111	0.261905	0.025641
0.125	0.140845	0.225806	0.230769	0.081081	0.290323	0.125	0.1	0.21875	0.090909	0.15625	0.242424	0.233333	0.2	0.2	0.114286	0.146341	0.233333	0.222222	0.230769	0.146341	0.181818	0.233333	0.25	0.111111	0.190476	0.225806	0.357143	0.088608	0.322581	0.285714	0.232558	0.147541	0.34375	0.133333	0.16	0.243243	0.157895	0.27027	0.125	0.157895	0.232558	0.297872	0.195122	0.22	0.243243	0.041667	0.119048	0.190476	0.121212
0.134615	0.114754	0.041667	0.029412	0.227273	0.227273	0.210526	0.068966	0.130435	0.095238	0.263158	0.037037	0.263158	0.045455	0.095238	0.04	0.214286	0.263158	0.2	0.029412	0.214286	0.130435	0.090909	0.119048	0.125	0.057143	0.25	0.041667	0.089552	0.217391	0.185185	0.176471	0.212766	0.25	0.1875	0.097561	0.222222	0.068966	0.214286	0.205882	0.291667	0.176471	0.142857	0.16129	0.142857	0.222222	0.15625	0.172414	0.193548	0.043478
0.107143	0.109375	0	0	0.034483	0.153846	0.130435	0.096774	0.115385	0.130435	0.173913	0	0.173913	0.04	0.04	0.074074	0.15625	0.173913	0.184211	0	0.15625	0.16	0.038462	0.136364	0.111111	0.081081	0.166667	0	0.101449	0.192308	0.346154	0.228571	0.22449	0.178571	0.205882	0.116279	0.285714	0.030303	0.233333	0.333333	0.307692	0.264706	0.159091	0.258065	0.108696	0.241379	0.142857	0.233333	0.212121	0
0.148148	0.092308	0.076923	0.117647	0.034483	0.2	0.130435	0.096774	0.115385	0.083333	0.285714	0.033333	0.227273	0	0	0.035714	0.15625	0.173913	0.125	0.055556	0.15625	0.115385	0.038462	0.25	0.153846	0.052632	0.166667	0	0.070423	0.148148	0.166667	0.194444	0.132075	0.222222	0.205882	0.142857	0.2	0.030303	0.233333	0.571429	0.214286	0.30303	0.243902	0.147059	0.133333	0.16129	0.111111	0.193548	0.290323	0.08
0.107143	0.092308	0.037037	0.055556	0.071429	0.2	0.130435	0.096774	0.115385	0.130435	0.173913	0.033333	0.227273	0.04	0.04	0.035714	0.15625	0.173913	0.153846	0.027027	0.15625	0.074074	0.08	0.136364	0.153846	0.081081	0.272727	0	0.070423	0.291667	0.206897	0.264706	0.111111	0.222222	0.322581	0.116279	0.16129	0.0625	0.193548	0.189189	0.172414	0.194444	0.133333	0.181818	0.186047	0.241379	0.111111	0.193548	0.176471	0.038462
0.133333	0.149254	0.096774	0.1	0.2	0.2	0.103448	0.111111	0.129032	0.066667	0.137931	0.088235	0.178571	0.066667	0.066667	0.09375	0.162162	0.137931	0.214286	0.073171	0.162162	0.09375	0.1	0.217391	0.16129	0.045455	0.172414	0.0625	0.123288	0.15625	0.205882	0.225	0.222222	0.258065	0.146341	0.148936	0.2	0.081081	0.162162	0.315789	0.25	0.225	0.23913	0.216216	0.1875	0.135135	0.121951	0.162162	0.210526	0.1
0.117647	0.1	0.045455	0.064516	0.041667	0.388889	0.166667	0.074074	0.2	0	0.294118	0.083333	0.375	0.05	0.05	0.090909	0.142857	0.294118	0.142857	0.1	0.142857	0.090909	0.1	0.153846	0.086957	0.029412	0.277778	0	0.028986	0.3	0.2	0.266667	0.1	0.333333	0.2	0.075	0.192308	0.115385	0.28	0.21875	0.208333	0.266667	0.210526	0.214286	0.179487	0.24	0.029412	0.103448	0.25	0.1
0.181818	0.15625	0.068966	0.078947	0.064516	0.178571	0.16	0.15625	0.103448	0.115385	0.153846	0.0625	0.2	0.035714	0.035714	0.032258	0.176471	0.153846	0.230769	0.051282	0.176471	0.103448	0.071429	0.261905	0.222222	0.102564	0.24	0	0.067568	0.259259	0.266667	0.314286	0.188679	0.2	0.375	0.159091	0.344828	0.088235	0.333333	0.382353	0.321429	0.314286	0.255814	0.235294	0.227273	0.444444	0.131579	0.176471	0.264706	0.111111
0.117647	0.1	0.045455	0.137931	0.041667	0.315789	0.166667	0	0.2	0	0.375	0	0.294118	0.166667	0.105263	0.142857	0.103448	0.222222	0.142857	0	0.103448	0.090909	0.1	0.216216	0	0.060606	0.210526	0.045455	0.028986	0.238095	0.25	0.225806	0.1	0.4	0.285714	0.04878	0.148148	0.074074	0.391304	0.21875	0.208333	0.310345	0.243243	0.214286	0.179487	0.291667	0.060606	0.103448	0.346154	0
0.173077	0.147541	0.038462	0.121212	0.035714	0.318182	0.190476	0.03125	0.166667	0	0.3	0.034483	0.3	0.041667	0.041667	0.037037	0.16129	0.238095	0.189189	0.027778	0.16129	0.166667	0.083333	0.289474	0.035714	0.026316	0.227273	0	0.041667	0.25	0.259259	0.235294	0.156863	0.28	0.37931	0.044444	0.25	0.064516	0.384615	0.264706	0.269231	0.272727	0.282051	0.266667	0.136364	0.346154	0.026316	0.125	0.344828	0.04
0.189655	0.130435	0.029412	0.046512	0.15625	0.193548	0.137931	0.078947	0.125	0.064516	0.172414	0.055556	0.172414	0.03125	0.03125	0.028571	0.157895	0.172414	0.181818	0.046512	0.157895	0.125	0.0625	0.23913	0.121212	0.044444	0.129032	0	0.092105	0.151515	0.3125	0.351351	0.264151	0.212121	0.230769	0.078431	0.30303	0.078947	0.375	0.342105	0.366667	0.351351	0.26087	0.277778	0.137255	0.30303	0.119048	0.128205	0.305556	0.0625
0.137931	0.153846	0.032258	0.076923	0.030303	0.096774	0.111111	0.055556	0.137931	0	0.148148	0.060606	0.107143	0.071429	0.034483	0.178571	0.205882	0.148148	0.225	0.05	0.205882	0.1	0.107143	0.173913	0.0625	0.1	0.142857	0	0.052632	0.206897	0.21875	0.236842	0.142857	0.233333	0.184211	0.083333	0.176471	0.1875	0.138889	0.170732	0.1875	0.27027	0.195652	0.30303	0.170213	0.212121	0.047619	0.138889	0.189189	0.068966
0.147541	0.161765	0.058824	0.045455	0.055556	0.151515	0.133333	0.105263	0.088235	0.133333	0.129032	0.026316	0.166667	0.0625	0.030303	0.057143	0.153846	0.129032	0.232558	0.045455	0.153846	0.121212	0.060606	0.208333	0.151515	0.116279	0.2	0	0.105263	0.21875	0.30303	0.416667	0.259259	0.205882	0.324324	0.142857	0.333333	0.076923	0.323529	0.368421	0.3125	0.342105	0.229167	0.27027	0.204082	0.333333	0.142857	0.184211	0.263158	0.060606
0.25	0.222222	0	0	0.115385	0.074074	0.08	0.068966	0.055556	0.058824	0.078431	0.017241	0.078431	0.038462	0.038462	0.036364	0.203704	0.078431	0.196721	0	0.203704	0.075472	0.037736	0.147059	0.035714	0.0625	0.098039	0.037037	0.209302	0.092593	0.188679	0.183333	0.87234	0.109091	0.189655	0.169231	0.185185	0.033333	0.160714	0.180328	0.215686	0.20339	0.161765	0.264151	0.082192	0.185185	0.172414	0.203704	0.152542	0
0.2	0.171875	0.032258	0.02439	0	0.259259	0.153846	0	0.137931	0	0.24	0	0.24	0.071429	0.071429	0.03125	0.171429	0.192308	0.195122	0	0.171429	0.1	0.068966	0.255814	0	0.023256	0.185185	0	0.025641	0.206897	0.3	0.382353	0.185185	0.233333	0.451613	0.019608	0.290323	0.027027	0.366667	0.297297	0.407407	0.342857	0.27907	0.30303	0.122449	0.37931	0.023256	0.108108	0.294118	0.033333
0.183333	0.15942	0.057143	0.146341	0.026316	0.181818	0.129032	0.075	0.117647	0	0.2	0.052632	0.16129	0.060606	0.029412	0.151515	0.121951	0.125	0.227273	0.093023	0.121951	0.117647	0.058824	0.311111	0.083333	0.088889	0.15625	0	0.103896	0.176471	0.333333	0.405405	0.232143	0.3125	0.315789	0.117647	0.323529	0.131579	0.352941	0.394737	0.30303	0.444444	0.333333	0.371429	0.25	0.285714	0.042553	0.095238	0.324324	0.090909
0.15942	0.202703	0.045455	0.076923	0.021277	0.090909	0.128205	0.106383	0.093023	0.047619	0.097561	0.042553	0.097561	0.047619	0.023256	0.119048	0.145833	0.097561	0.285714	0.076923	0.145833	0.119048	0.071429	0.259259	0.116279	0.115385	0.121951	0	0.13253	0.139535	0.204545	0.244898	0.21875	0.186047	0.229167	0.157895	0.2	0.155556	0.145833	0.291667	0.181818	0.244898	0.277778	0.266667	0.169492	0.2	0.137255	0.145833	0.183673	0.071429
0.228916	0.206522	0.014925	0.012987	0.076923	0.076923	0.064516	0.104478	0.045455	0.047619	0.063492	0.028986	0.063492	0.03125	0.03125	0.061538	0.166667	0.063492	0.197183	0.026316	0.166667	0.061538	0.046875	0.125	0.060606	0.09589	0.096774	0.030303	0.333333	0.109375	0.119403	0.152778	0.333333	0.123077	0.157143	0.222222	0.134328	0.088235	0.115942	0.166667	0.15625	0.152778	0.1375	0.179104	0.197368	0.134328	0.142857	0.166667	0.111111	0.015152
0.488889	0.407407	0.064516	0.04878	0.129032	0.129032	0.107143	0.114286	0.172414	0.033333	0.142857	0.058824	0.103448	0.033333	0.068966	0.096774	0.75	0.103448	0.219512	0.02381	0.615385	0.0625	0.066667	0.170213	0.060606	0	0.137931	0.064516	0.08	0.090909	0.111111	0.116279	0.203704	0.117647	0.15	0.104167	0.171429	0.026316	0.105263	0.139535	0.181818	0.116279	0.166667	0.189189	0.076923	0.138889	0.071429	0.4	0.125	0.066667
0.122807	0.140625	0.111111	0.081081	0.032258	0.28	0.166667	0.16129	0.192308	0.076923	0.208333	0.1	0.26087	0.076923	0.076923	0	0.181818	0.26087	0.205128	0.081081	0.181818	0.192308	0.074074	0.268293	0.103448	0.05	0.25	0.071429	0.083333	0.222222	0.321429	0.285714	0.127273	0.25	0.228571	0.020408	0.310345	0.028571	0.344828	0.243243	0.241379	0.285714	0.232558	0.205882	0.204545	0.357143	0.05	0.114286	0.4	0.115385
0.216667	0.223881	0	0	0.108108	0.138889	0.15625	0.097561	0.081081	0.088235	0.117647	0.02439	0.151515	0.027778	0.057143	0.052632	0.263158	0.117647	0.272727	0	0.297297	0.142857	0.027027	0.22	0.078947	0.0625	0.181818	0.054054	0.12987	0.2	0.210526	0.255814	0.267857	0.128205	0.3	0.156863	0.342857	0.022727	0.263158	0.341463	0.285714	0.285714	0.215686	0.25	0.148148	0.305556	0.159091	0.263158	0.186047	0
0.128571	0.142857	0.046512	0.1	0.021739	0.119048	0.102564	0.02	0.095238	0	0.157895	0.021277	0.1	0.075	0.04878	0.15	0.125	0.1	0.215686	0.018519	0.125	0.095238	0.073171	0.218182	0.021739	0.096154	0.125	0.022727	0.107143	0.142857	0.238095	0.25	0.222222	0.219512	0.288889	0.101695	0.204545	0.085106	0.255814	0.196078	0.214286	0.25	0.214286	0.272727	0.283019	0.204545	0.036364	0.08	0.212766	0.023256
0.036364	0.047619	0.533333	0.434783	0.041667	0.190476	0	0.318182	0.2	0.166667	0	0.444444	0.157895	0.166667	0.166667	0	0.032258	0.157895	0.052632	0.434783	0.032258	0.142857	0.222222	0.25	0.388889	0.09375	0.15	0.352941	0.014286	0.130435	0.111111	0.117647	0	0.166667	0	0.075	0.107143	0.16	0.103448	0.083333	0	0.117647	0.243243	0.030303	0.15	0.107143	0	0.032258	0.09375	0.571429
0.177419	0.171429	0.258065	0.25641	0.051282	0.322581	0.121212	0.25	0.212121	0.15625	0.151515	0.235294	0.266667	0.121212	0.121212	0.025641	0.142857	0.225806	0.191489	0.225	0.170732	0.176471	0.151515	0.452381	0.242424	0.108696	0.258065	0.21875	0.074074	0.235294	0.314286	0.35	0.126984	0.294118	0.268293	0.113208	0.342857	0.046512	0.411765	0.309524	0.216216	0.35	0.409091	0.162791	0.215686	0.382353	0.085106	0.142857	0.275	0.1875
0.12987	0.129412	0	0	0	0.1	0.085106	0.053571	0.058824	0.085106	0.106383	0	0.106383	0	0	0.018868	0.087719	0.106383	0.111111	0	0.087719	0.058824	0	0.136364	0.037736	0.048387	0.104167	0	0.10989	0.098039	0.153846	0.214286	0.164384	0.074074	0.222222	0.106061	0.22	0	0.192308	0.277778	0.18	0.192982	0.134328	0.163636	0.070423	0.22	0.101695	0.107143	0.140351	0
0.136986	0.164557	0.065217	0.229167	0.0625	0.133333	0.093023	0.057692	0.111111	0	0.142857	0.061224	0.090909	0.093023	0.093023	0.136364	0.115385	0.090909	0.178571	0.113208	0.09434	0.06383	0.090909	0.183333	0.0625	0.089286	0.113636	0.065217	0.141176	0.130435	0.191489	0.163636	0.140845	0.2	0.192308	0.131148	0.14	0.078431	0.137255	0.181818	0.145833	0.207547	0.220339	0.276596	0.333333	0.14	0.033898	0.09434	0.150943	0.090909
0.238095	0.242857	0.023256	0.125	0.069767	0.121951	0.105263	0.086957	0.097561	0.105263	0.162162	0.068182	0.102564	0.02439	0.05	0.046512	0.204545	0.102564	0.270833	0.058824	0.204545	0.097561	0.04878	0.32	0.121951	0.076923	0.128205	0.023256	0.095238	0.146341	0.214286	0.255319	0.225806	0.166667	0.357143	0.122807	0.3	0.086957	0.261905	0.363636	0.25	0.311111	0.34	0.309524	0.155172	0.238095	0.076923	0.177778	0.244444	0.075
0.180328	0.208955	0	0.066667	0	0.142857	0.125	0	0.114286	0	0.193548	0	0.15625	0.028571	0.028571	0.026316	0.119048	0.121212	0.222222	0	0.119048	0.114286	0.027778	0.276596	0	0.06383	0.1875	0	0.02381	0.205882	0.25	0.292683	0.166667	0.162162	0.416667	0.054545	0.314286	0.023256	0.342857	0.255814	0.294118	0.325	0.270833	0.25641	0.150943	0.314286	0.020408	0.068182	0.25	0
0.142857	0.202703	0.045455	0.056604	0.021277	0.090909	0.073171	0.083333	0.093023	0.047619	0.097561	0.042553	0.071429	0.047619	0.023256	0.093023	0.145833	0.097561	0.235294	0.037037	0.145833	0.093023	0.046512	0.236364	0.116279	0.09434	0.095238	0	0.13253	0.113636	0.232558	0.270833	0.278689	0.159091	0.204082	0.178571	0.255814	0.083333	0.170213	0.377778	0.238095	0.297872	0.254545	0.325581	0.169492	0.227273	0.115385	0.145833	0.16	0.071429
0.15493	0.197368	0.043478	0.074074	0.020408	0.086957	0.121951	0.102041	0.088889	0.045455	0.093023	0.040816	0.093023	0.045455	0.022222	0.113636	0.14	0.093023	0.27451	0.074074	0.14	0.113636	0.068182	0.25	0.111111	0.111111	0.116279	0	0.142857	0.133333	0.195652	0.235294	0.212121	0.177778	0.22	0.152542	0.166667	0.148936	0.14	0.28	0.173913	0.235294	0.267857	0.255319	0.163934	0.191489	0.132075	0.14	0.25	0.068182
0.212121	0.219178	0.045455	0.12	0.021277	0.090909	0.1	0.083333	0.093023	0.047619	0.153846	0.042553	0.097561	0	0	0.021739	0.195652	0.097561	0.211538	0.037037	0.170213	0.093023	0.022727	0.283019	0.116279	0.054545	0.121951	0	0.08046	0.113636	0.204545	0.22	0.21875	0.108696	0.255319	0.137931	0.255814	0.04	0.195652	0.44186	0.209302	0.297872	0.277778	0.212766	0.15	0.2	0.074074	0.170213	0.183673	0.071429
0.098039	0.083333	0	0	0.043478	0.263158	0.176471	0.076923	0.15	0.25	0.4	0	0.3125	0.052632	0.052632	0.045455	0.148148	0.4	0.114286	0	0.148148	0.095238	0.05	0.1	0.142857	0.133333	0.222222	0	0.076923	0.25	0.208333	0.15625	0.148936	0.227273	0.166667	0.105263	0.153846	0.037037	0.24	0.225806	0.217391	0.15625	0.125	0.178571	0.125	0.2	0.133333	0.192308	0.172414	0
0.166667	0.142857	0.074074	0.054054	0.192308	0.033333	0	0.206897	0.034483	0.125	0	0.066667	0	0.038462	0.08	0.071429	0.225806	0	0.121951	0.054054	0.225806	0	0.076923	0.040816	0.192308	0.078947	0.035714	0.074074	0.166667	0.103448	0.028571	0.073171	0.196078	0.0625	0.05	0.25641	0.057143	0.060606	0.027027	0.184211	0.029412	0.073171	0.04	0.052632	0.04	0.027778	0.205882	0.266667	0.051282	0.076923
0.213115	0.169014	0.176471	0.282051	0.05	0.354839	0.085714	0.210526	0.242424	0.225806	0.21875	0.131579	0.258065	0.151515	0.151515	0.108108	0.139535	0.21875	0.117647	0.190476	0.113636	0.138889	0.181818	0.291667	0.235294	0.130435	0.25	0.111111	0.060241	0.228571	0.175	0.170213	0.107692	0.285714	0.152174	0.132075	0.170732	0.095238	0.25641	0.244444	0.095238	0.222222	0.285714	0.133333	0.235294	0.2	0.061224	0.139535	0.209302	0.258065
0.050847	0.075758	0	0	0.034483	0	0.04	0.214286	0	0.181818	0	0	0	0.083333	0.04	0.115385	0.057143	0	0.071429	0	0.088235	0.035714	0.08	0.020408	0.111111	0.176471	0	0	0.169231	0.107143	0.060606	0.04878	0.153846	0.1	0.025	0.263158	0	0.096774	0.027778	0.073171	0.030303	0.04878	0.02	0.083333	0.108696	0.058824	0.290323	0.15625	0.052632	0
0.107692	0.125	0	0	0.142857	0.111111	0.125	0.073171	0.083333	0.090909	0.121212	0.025	0.121212	0.058824	0.058824	0.147059	0.146341	0.121212	0.145833	0	0.146341	0.083333	0.057143	0.090909	0.052632	0.282051	0.151515	0.027027	0.211268	0.171429	0.216216	0.204545	0.272727	0.228571	0.159091	0.288889	0.179487	0.1	0.146341	0.2	0.222222	0.177778	0.109091	0.195122	0.244898	0.179487	0.282051	0.205128	0.136364	0
0.064103	0.057471	0.065217	0.229167	0.02	0.040816	0	0.078431	0.041667	0	0.043478	0.04	0	0.044444	0.044444	0.020408	0.035714	0	0.047619	0.113208	0.017544	0	0.066667	0.126984	0.085106	0.016667	0	0	0.021053	0.019608	0.018182	0.032258	0.0125	0.038462	0.068966	0.061538	0	0.1	0.054545	0.065574	0.018519	0.066667	0.125	0.052632	0.180328	0.036364	0.016667	0.017544	0.070175	0.142857
0.145161	0.19403	0.027778	0.044444	0.026316	0.181818	0.129032	0	0.117647	0	0.16129	0	0.16129	0.060606	0.060606	0.085714	0.121951	0.125	0.227273	0	0.095238	0.117647	0.090909	0.282609	0	0.020833	0.15625	0.027778	0.024096	0.176471	0.294118	0.405405	0.189655	0.235294	0.351351	0.036364	0.323529	0.02381	0.314286	0.261905	0.34375	0.368421	0.304348	0.333333	0.132075	0.285714	0.020833	0.069767	0.289474	0.028571
0.172414	0.184615	0	0	0	0.16129	0.142857	0	0.129032	0	0.178571	0	0.178571	0.066667	0.032258	0.09375	0.162162	0.178571	0.275	0	0.162162	0.129032	0.064516	0.272727	0	0.045455	0.172414	0	0.025	0.193548	0.322581	0.441176	0.2	0.258065	0.424242	0.038462	0.354839	0.052632	0.30303	0.282051	0.333333	0.361111	0.325581	0.323529	0.14	0.354839	0.045455	0.102564	0.314286	0
0.098361	0.101449	0.03125	0.02381	0.206897	0.166667	0.107143	0.054054	0.096774	0.068966	0.142857	0.028571	0.185185	0.068966	0.033333	0.096774	0.135135	0.142857	0.136364	0.02381	0.135135	0.096774	0.066667	0.145833	0.09375	0.184211	0.137931	0	0.140845	0.16129	0.212121	0.333333	0.25	0.310345	0.179487	0.177778	0.138889	0.114286	0.166667	0.225	0.21875	0.230769	0.166667	0.222222	0.217391	0.171429	0.216216	0.105263	0.216216	0.032258
0.163636	0.15873	0.153846	0.142857	0.032258	0.28	0.166667	0.125	0.24	0.12	0.16	0.137931	0.318182	0.166667	0.166667	0.068966	0.181818	0.318182	0.236842	0.111111	0.181818	0.24	0.16	0.333333	0.142857	0.105263	0.304348	0.111111	0.026316	0.32	0.423077	0.451613	0.192308	0.296296	0.30303	0.041667	0.583333	0.058824	0.5	0.314286	0.333333	0.451613	0.325	0.322581	0.152174	0.52	0.02439	0.114286	0.4	0.16
0.206897	0.161765	0.028571	0.095238	0.027027	0.1875	0.133333	0.02439	0.088235	0	0.206897	0.026316	0.206897	0.0625	0.030303	0.057143	0.184211	0.166667	0.204545	0.022222	0.184211	0.088235	0.09375	0.318182	0.027027	0.043478	0.16129	0	0.037037	0.181818	0.30303	0.378378	0.192982	0.242424	0.441176	0.037037	0.257143	0.076923	0.363636	0.368421	0.354839	0.416667	0.311111	0.27027	0.134615	0.333333	0.043478	0.125	0.333333	0.029412
0.20339	0.15942	0.027778	0.068182	0.026316	0.181818	0.129032	0.02381	0.085714	0	0.2	0.025641	0.2	0.060606	0.029412	0.055556	0.179487	0.16129	0.2	0.021739	0.179487	0.085714	0.090909	0.282609	0.026316	0.042553	0.15625	0	0.036585	0.176471	0.294118	0.368421	0.189655	0.235294	0.428571	0.036364	0.25	0.075	0.352941	0.358974	0.34375	0.405405	0.276596	0.263158	0.132075	0.323529	0.042553	0.121951	0.361111	0.028571
0.181818	0.208333	0.023256	0.018868	0	0.15	0.135135	0.020408	0.097561	0	0.162162	0.021739	0.131579	0.076923	0.05	0.071429	0.12766	0.131579	0.196078	0	0.152174	0.125	0.075	0.222222	0	0.037037	0.128205	0	0.033708	0.146341	0.243902	0.282609	0.169231	0.195122	0.266667	0.04918	0.3	0.041667	0.292683	0.25	0.282051	0.340909	0.240741	0.25	0.135593	0.268293	0.056604	0.081633	0.244444	0.02381
0.144928	0.142857	0.071429	0.222222	0.044444	0.205128	0.075	0.108696	0.121951	0.102564	0.189189	0.043478	0.157895	0.04878	0.04878	0.045455	0.125	0.128205	0.127273	0.057692	0.102041	0.045455	0.073171	0.218182	0.146341	0.096154	0.125	0.022727	0.081395	0.142857	0.130435	0.176471	0.115942	0.190476	0.234043	0.140351	0.081633	0.108696	0.173913	0.22	0.108696	0.176471	0.236364	0.142857	0.214286	0.152174	0.075472	0.125	0.1875	0.1
0.166667	0.1625	0.111111	0.25	0.04	0.209302	0.090909	0.166667	0.159091	0.142857	0.166667	0.104167	0.166667	0.116279	0.116279	0.02	0.156863	0.166667	0.135593	0.132075	0.134615	0.133333	0.139535	0.285714	0.181818	0.127273	0.190476	0.086957	0.101124	0.177778	0.266667	0.25	0.138889	0.222222	0.235294	0.147541	0.234043	0.098039	0.282609	0.269231	0.142857	0.27451	0.258621	0.12963	0.177419	0.234043	0.107143	0.156863	0.24	0.139535
0.115385	0.116667	0.090909	0.096774	0.083333	0.444444	0.157895	0.071429	0.25	0	0.277778	0.08	0.352941	0.1	0.1	0.136364	0.137931	0.277778	0.171429	0.096774	0.137931	0.086957	0.15	0.179487	0.083333	0.058824	0.263158	0.043478	0.043478	0.285714	0.291667	0.258065	0.12	0.45	0.193548	0.128205	0.142857	0.153846	0.32	0.176471	0.2	0.258065	0.205128	0.25	0.236842	0.28	0.058824	0.1	0.285714	0.095238
0.113208	0.096774	0.136364	0.09375	0.038462	0.35	0.15	0.107143	0.238095	0	0.263158	0.076923	0.263158	0.045455	0.045455	0.04	0.172414	0.2	0.166667	0.09375	0.133333	0.130435	0.090909	0.205128	0.125	0.057143	0.190476	0	0.042857	0.166667	0.185185	0.25	0.075472	0.304348	0.117647	0.071429	0.269231	0.068966	0.172414	0.322581	0.192308	0.25	0.2	0.2	0.2	0.137931	0	0.096774	0.233333	0.2
0.111111	0.137931	0.037037	0.081967	0.115385	0.115385	0.08	0.068966	0.075472	0	0.078431	0.053571	0.1	0.038462	0.038462	0.075472	0.101695	0.078431	0.177419	0.1	0.101695	0.075472	0.057692	0.2	0.074074	0.096774	0.098039	0.018182	0.142857	0.092593	0.166667	0.245614	0.222222	0.173077	0.189655	0.151515	0.185185	0.127273	0.181818	0.241379	0.192308	0.245614	0.215385	0.218182	0.274194	0.163636	0.096774	0.065574	0.172414	0.1
0.178082	0.217949	0.04	0.107143	0.018868	0.125	0.086957	0.074074	0.06	0	0.133333	0.037736	0.133333	0.020408	0.020408	0.039216	0.109091	0.108696	0.232143	0.107143	0.109091	0.081633	0.040816	0.298246	0.08	0.015873	0.106383	0	0.020408	0.122449	0.18	0.218182	0.135135	0.14	0.27451	0.058824	0.25	0.115385	0.270833	0.283019	0.234043	0.264151	0.293103	0.211538	0.209677	0.22449	0.015873	0.070175	0.207547	0.108696
0.169014	0.194805	0.042553	0.092593	0.02	0.108696	0.093023	0.057692	0.06383	0.044444	0.142857	0.019608	0.116279	0.044444	0.021739	0.086957	0.137255	0.090909	0.178571	0.035088	0.137255	0.086957	0.043478	0.290909	0.085106	0.109091	0.139535	0	0.114943	0.155556	0.217391	0.28	0.227273	0.2	0.319149	0.169492	0.212766	0.078431	0.234043	0.413043	0.222222	0.306122	0.309091	0.25	0.2	0.266667	0.109091	0.137255	0.270833	0.043478
0.181818	0.204819	0.036364	0.175439	0.072727	0.134615	0.078431	0.067797	0.137255	0.078431	0.12	0.052632	0.098039	0.078431	0.057692	0.09434	0.157895	0.076923	0.254237	0.080645	0.157895	0.054545	0.076923	0.234375	0.092593	0.131148	0.096154	0.075472	0.153846	0.090909	0.185185	0.2	0.202703	0.192308	0.206897	0.222222	0.160714	0.067797	0.2	0.303571	0.145455	0.241379	0.25	0.236364	0.230769	0.160714	0.095238	0.157895	0.189655	0.056604
0.168421	0.188119	0.026667	0.12987	0.039474	0.112676	0.056338	0.050633	0.098592	0.056338	0.085714	0.038961	0.085714	0.056338	0.041667	0.083333	0.116883	0.070423	0.175	0.060976	0.116883	0.04	0.070423	0.178571	0.067568	0.098765	0.084507	0.040541	0.126126	0.111111	0.135135	0.15	0.147368	0.123288	0.2	0.127907	0.118421	0.077922	0.178082	0.207792	0.121622	0.179487	0.204819	0.142857	0.204819	0.148649	0.059524	0.102564	0.141026	0.041096
0.144737	0.142857	0.039216	0.188679	0.057692	0.170213	0.0625	0.072727	0.102041	0.085106	0.130435	0.056604	0.130435	0.0625	0.0625	0.08	0.127273	0.106383	0.166667	0.05	0.127273	0.038462	0.061224	0.171875	0.1	0.101695	0.12766	0.06	0.147727	0.166667	0.132075	0.133333	0.180556	0.183673	0.178571	0.237288	0.089286	0.072727	0.169811	0.232143	0.113208	0.172414	0.1875	0.142857	0.1875	0.150943	0.160714	0.148148	0.160714	0.061224
0.177215	0.186047	0.035088	0.169492	0.070175	0.150943	0.075472	0.065574	0.111111	0.075472	0.115385	0.050847	0.115385	0.055556	0.055556	0.090909	0.152542	0.09434	0.225806	0.078125	0.152542	0.052632	0.054545	0.208955	0.089286	0.092308	0.113208	0.072727	0.150538	0.107143	0.157895	0.213115	0.197368	0.185185	0.263158	0.234375	0.155172	0.065574	0.214286	0.293103	0.12069	0.213115	0.223881	0.166667	0.205882	0.175439	0.145161	0.152542	0.183333	0.054545
0.15942	0.171053	0.179487	0.191489	0.043478	0.263158	0.1	0.238095	0.175	0.157895	0.125	0.166667	0.216216	0.073171	0.073171	0	0.145833	0.184211	0.188679	0.191489	0.170213	0.146341	0.097561	0.36	0.2	0.115385	0.210526	0.15	0.119048	0.195122	0.232558	0.297872	0.2	0.214286	0.204082	0.157895	0.285714	0.04	0.309524	0.347826	0.181818	0.297872	0.326923	0.1875	0.169492	0.285714	0.115385	0.170213	0.208333	0.153846
0.1875	0.164384	0.135135	0.238095	0.047619	0.294118	0.111111	0.170732	0.194444	0.176471	0.171429	0.125	0.242424	0.142857	0.142857	0.075	0.133333	0.205882	0.18	0.130435	0.133333	0.162162	0.171429	0.333333	0.157895	0.148936	0.235294	0.105263	0.084337	0.285714	0.324324	0.357143	0.15625	0.305556	0.341463	0.148148	0.315789	0.090909	0.416667	0.288889	0.230769	0.425	0.354167	0.204545	0.226415	0.388889	0.102041	0.133333	0.317073	0.171429
0.111111	0.112676	0.16129	0.277778	0.055556	0.117647	0	0.235294	0.121212	0.214286	0.060606	0.147059	0.09375	0.172414	0.172414	0.121212	0.071429	0.09375	0.104167	0.15	0.071429	0.088235	0.206897	0.16	0.266667	0.230769	0.090909	0.125	0.150685	0.181818	0.131579	0.108696	0.133333	0.205882	0.065217	0.244444	0.073171	0.135135	0.153846	0.155556	0.02439	0.159091	0.18	0.093023	0.113208	0.157895	0.2	0.125	0.142857	0.206897
0.169231	0.133333	0.135135	0.238095	0.047619	0.294118	0.081081	0.2	0.194444	0.176471	0.171429	0.125	0.242424	0.142857	0.142857	0.102564	0.133333	0.205882	0.134615	0.130435	0.133333	0.131579	0.171429	0.254902	0.222222	0.173913	0.235294	0.105263	0.125	0.285714	0.225	0.23913	0.174603	0.305556	0.170213	0.215686	0.190476	0.090909	0.275	0.26087	0.116279	0.266667	0.27451	0.152174	0.181818	0.25	0.173913	0.159091	0.227273	0.171429
0.129032	0.161765	0.285714	0.314286	0.055556	0.310345	0.133333	0.272727	0.233333	0.172414	0.166667	0.258065	0.25	0.172414	0.172414	0.027778	0.153846	0.206897	0.177778	0.277778	0.153846	0.193548	0.206897	0.380952	0.266667	0.116279	0.285714	0.241379	0.076923	0.258065	0.264706	0.214286	0.096774	0.28125	0.166667	0.142857	0.222222	0.076923	0.25	0.209302	0.105263	0.214286	0.340909	0.146341	0.255319	0.257143	0.090909	0.153846	0.170732	0.296296
0.152542	0.132353	0.172414	0.222222	0.058824	0.285714	0.103448	0.176471	0.206897	0.185185	0.178571	0.15625	0.269231	0.185185	0.185185	0.129032	0.131579	0.222222	0.186047	0.128205	0.131579	0.166667	0.222222	0.272727	0.2	0.179487	0.307692	0.133333	0.093333	0.37037	0.322581	0.25641	0.137931	0.392857	0.236842	0.148936	0.235294	0.142857	0.30303	0.190476	0.142857	0.324324	0.295455	0.216216	0.23913	0.3125	0.095238	0.131579	0.277778	0.178571
0.081967	0.086957	0.185185	0.3125	0.0625	0.133333	0	0.225806	0.137931	0.25	0.068966	0.166667	0.107143	0.2	0.2	0.137931	0.051282	0.107143	0.113636	0.166667	0.051282	0.1	0.24	0.148936	0.307692	0.294118	0.103448	0.142857	0.126761	0.129032	0.147059	0.146341	0.103448	0.233333	0.071429	0.238095	0.081081	0.151515	0.171429	0.142857	0.027027	0.205128	0.170213	0.102564	0.145833	0.142857	0.128205	0.108108	0.189189	0.192308
0.134328	0.103896	0.135135	0.238095	0.047619	0.294118	0.081081	0.2	0.194444	0.176471	0.171429	0.125	0.242424	0.142857	0.142857	0.102564	0.108696	0.205882	0.134615	0.130435	0.108696	0.131579	0.171429	0.254902	0.189189	0.173913	0.235294	0.105263	0.111111	0.285714	0.225	0.23913	0.15625	0.305556	0.195652	0.192308	0.190476	0.090909	0.275	0.26087	0.116279	0.266667	0.27451	0.152174	0.181818	0.25	0.148936	0.133333	0.227273	0.171429
0.183908	0.142857	0.078125	0.161765	0.028986	0.145161	0.063492	0.102941	0.09375	0.080645	0.114754	0.074627	0.133333	0.063492	0.063492	0.060606	0.098592	0.114754	0.131579	0.082192	0.098592	0.076923	0.079365	0.22973	0.092308	0.08	0.112903	0.061538	0.114286	0.125	0.1875	0.2	0.174419	0.174603	0.205882	0.155844	0.149254	0.056338	0.258065	0.231884	0.136364	0.235294	0.243243	0.142857	0.135802	0.203125	0.094595	0.114286	0.246154	0.0625
0.126984	0.09589	0.275862	0.342857	0.054054	0.344828	0.09375	0.194444	0.225806	0.25	0.2	0.212121	0.285714	0.166667	0.166667	0.085714	0.121951	0.241379	0.125	0.205128	0.121951	0.151515	0.2	0.340909	0.258065	0.166667	0.275862	0.233333	0.089744	0.290323	0.257143	0.209302	0.131148	0.354839	0.190476	0.14	0.184211	0.04878	0.314286	0.232558	0.131579	0.268293	0.363636	0.142857	0.176471	0.25	0.088889	0.15	0.324324	0.16129
0.213115	0.136986	0.142857	0.190476	0.05	0.3125	0.085714	0.243243	0.205882	0.1875	0.181818	0.131579	0.258065	0.085714	0.085714	0.025	0.139535	0.21875	0.096154	0.162791	0.139535	0.138889	0.114286	0.24	0.235294	0.130435	0.25	0.081081	0.113924	0.228571	0.175	0.170213	0.16129	0.25	0.152174	0.22449	0.170732	0.069767	0.25641	0.302326	0.095238	0.222222	0.235294	0.108696	0.166667	0.2	0.130435	0.166667	0.209302	0.21875
0.174603	0.152778	0.25	0.315789	0.05	0.3125	0.117647	0.179487	0.205882	0.1875	0.181818	0.194444	0.258065	0.151515	0.151515	0.078947	0.139535	0.21875	0.163265	0.190476	0.139535	0.171429	0.181818	0.409091	0.2	0.130435	0.25	0.212121	0.073171	0.264706	0.305556	0.341463	0.142857	0.323529	0.358974	0.132075	0.333333	0.045455	0.441176	0.302326	0.243243	0.410256	0.431818	0.186047	0.211538	0.411765	0.083333	0.139535	0.333333	0.147059
0.123077	0.093333	0.258065	0.324324	0.051282	0.322581	0.088235	0.216216	0.212121	0.193548	0.1875	0.2	0.266667	0.15625	0.15625	0.081081	0.116279	0.225806	0.12	0.195122	0.116279	0.142857	0.1875	0.326087	0.205882	0.159091	0.258065	0.21875	0.101266	0.272727	0.243243	0.2	0.145161	0.333333	0.209302	0.18	0.175	0.046512	0.297297	0.25	0.125	0.255814	0.347826	0.136364	0.169811	0.236842	0.133333	0.142857	0.243902	0.151515
0.166667	0.146667	0.264706	0.394737	0.046512	0.323529	0.078947	0.195122	0.222222	0.171429	0.2	0.179487	0.235294	0.171429	0.171429	0.073171	0.155556	0.2	0.132075	0.204545	0.130435	0.128205	0.2	0.354167	0.184211	0.145833	0.228571	0.194444	0.083333	0.243243	0.219512	0.183673	0.119403	0.297297	0.166667	0.166667	0.159091	0.113636	0.268293	0.229167	0.113636	0.234043	0.375	0.148936	0.245283	0.214286	0.078431	0.130435	0.222222	0.2
0.173913	0.168831	0	0	0.020833	0.113636	0.097561	0.06	0.066667	0.097561	0.095238	0	0.121951	0	0	0.021277	0.166667	0.095238	0.142857	0	0.166667	0.066667	0	0.189655	0.065217	0.053571	0.093023	0	0.091954	0.086957	0.173913	0.215686	0.179104	0.130435	0.2	0.098361	0.222222	0	0.191489	0.340426	0.177778	0.24	0.186441	0.16	0.060606	0.145833	0.113208	0.166667	0.229167	0
0.108911	0.163462	0.083333	0.08642	0.012658	0.111111	0.055556	0.037037	0.097222	0.041096	0.069444	0.125	0.1	0.055556	0.055556	0.039474	0.074074	0.1	0.130952	0.157895	0.0875	0.097222	0.054795	0.190476	0.038961	0.097561	0.098592	0.083333	0.016129	0.094595	0.148649	0.1625	0.1	0.121622	0.1375	0.031579	0.178082	0	0.175676	0.105882	0.12	0.177215	0.202381	0.1125	0.086022	0.146667	0	0.048193	0.139241	0.040541
0.196429	0.1875	0.03125	0.02381	0.029412	0.206897	0.148148	0	0.172414	0	0.185185	0	0.185185	0.033333	0.033333	0.0625	0.166667	0.185185	0.219512	0	0.2	0.133333	0.032258	0.25	0	0	0.178571	0.03125	0	0.16129	0.290323	0.297297	0.160714	0.1875	0.314286	0.019231	0.413793	0	0.354839	0.25641	0.258065	0.333333	0.217391	0.222222	0.12	0.322581	0	0.105263	0.216216	0
0.157895	0.136364	0.032258	0.02439	0.0625	0.172414	0.153846	0.085714	0.137931	0.111111	0.192308	0.029412	0.148148	0.034483	0.034483	0.03125	0.171429	0.148148	0.195122	0.02439	0.205882	0.137931	0.033333	0.173913	0.133333	0.047619	0.142857	0	0.081081	0.129032	0.21875	0.236842	0.207547	0.15625	0.184211	0.083333	0.290323	0.055556	0.171429	0.297297	0.225806	0.236842	0.170213	0.30303	0.1	0.212121	0.073171	0.171429	0.294118	0.068966
0.15625	0.121622	0.111111	0.190476	0.02439	0.235294	0.117647	0.095238	0.171429	0.085714	0.181818	0.102564	0.21875	0.151515	0.117647	0.078947	0.113636	0.21875	0.1875	0.086957	0.113636	0.171429	0.147059	0.291667	0.105263	0.130435	0.25	0.081081	0.047619	0.30303	0.382353	0.486486	0.180328	0.363636	0.358974	0.071429	0.333333	0.095238	0.441176	0.302326	0.277778	0.486486	0.3125	0.243902	0.188679	0.371429	0.04	0.088889	0.368421	0.114286
0.189655	0.181818	0.029412	0.022727	0.15625	0.15625	0.137931	0.025	0.090909	0	0.133333	0.055556	0.172414	0	0.03125	0	0.189189	0.133333	0.238095	0.022727	0.189189	0.090909	0.030303	0.23913	0.027778	0	0.206897	0.060606	0.064103	0.1875	0.2	0.219512	0.218182	0.142857	0.411765	0.057692	0.30303	0.025	0.257143	0.214286	0.322581	0.282051	0.234043	0.210526	0.137255	0.34375	0.044444	0.157895	0.205128	0.030303
0.183333	0.176471	0.121212	0.119048	0.026316	0.258065	0.129032	0.162162	0.225806	0.09375	0.125	0.142857	0.241379	0.09375	0.09375	0.027027	0.15	0.241379	0.227273	0.119048	0.15	0.1875	0.125	0.340909	0.147059	0.065217	0.275862	0.088235	0.024096	0.25	0.294118	0.333333	0.169492	0.235294	0.282051	0.036364	0.40625	0.04878	0.352941	0.261905	0.264706	0.368421	0.333333	0.263158	0.153846	0.363636	0	0.121951	0.289474	0.16129
0.125	0.157143	0.027027	0.021277	0.025641	0.142857	0.125	0.128205	0.114286	0.058824	0.121212	0.025	0.121212	0	0	0.026316	0.119048	0.121212	0.195652	0.021277	0.146341	0.114286	0.027778	0.2	0.052632	0.041667	0.151515	0	0.088608	0.138889	0.216216	0.292683	0.186441	0.162162	0.214286	0.054545	0.393939	0.023256	0.236842	0.384615	0.257143	0.292683	0.173077	0.225	0.173077	0.243243	0.086957	0.146341	0.25	0.027778
0.172414	0.184615	0.133333	0.128205	0.028571	0.285714	0.185185	0.176471	0.25	0.103448	0.137931	0.15625	0.269231	0.103448	0.103448	0.029412	0.162162	0.269231	0.243902	0.128205	0.194444	0.25	0.137931	0.365854	0.16129	0.069767	0.307692	0.096774	0.025	0.275862	0.366667	0.441176	0.157895	0.3	0.342857	0.038462	0.555556	0.052632	0.433333	0.315789	0.290323	0.484848	0.325581	0.25	0.1875	0.4	0.022222	0.102564	0.314286	0.178571
0.166667	0.19697	0.125	0.121951	0.027027	0.266667	0.172414	0.166667	0.233333	0.096774	0.129032	0.147059	0.25	0.096774	0.096774	0.027778	0.153846	0.206897	0.292683	0.121951	0.184211	0.233333	0.129032	0.380952	0.151515	0.066667	0.241379	0.090909	0.037037	0.21875	0.34375	0.457143	0.172414	0.28125	0.289474	0.037037	0.517241	0.05	0.363636	0.333333	0.272727	0.5	0.340909	0.236842	0.18	0.333333	0.021277	0.097561	0.297297	0.166667
0.103093	0.137255	0.073529	0.121622	0.071429	0.056338	0	0.128571	0.057143	0.075758	0	0.101449	0.028571	0.075758	0.075758	0.057143	0.064935	0.028571	0.111111	0.136986	0.064935	0.027778	0.090909	0.067416	0.102941	0.133333	0.042857	0.089552	0.247423	0.070423	0.052632	0.073171	0.166667	0.083333	0.02381	0.192308	0.038462	0.082192	0.037975	0.059524	0.012821	0.060241	0.078652	0.05	0.156627	0.051948	0.148649	0.108108	0.103896	0.090909
0.107143	0.109375	0.076923	0.055556	0.034483	0.25	0.181818	0.030303	0.16	0	0.227273	0.033333	0.227273	0.130435	0.083333	0.16	0.121212	0.227273	0.184211	0.085714	0.121212	0.115385	0.173913	0.136364	0.034483	0.142857	0.166667	0.037037	0.070423	0.291667	0.296296	0.228571	0.132075	0.375	0.138889	0.142857	0.16129	0.214286	0.275862	0.128205	0.214286	0.228571	0.186047	0.258065	0.243902	0.2	0.052632	0.088235	0.212121	0.038462
0.125	0.140845	0	0	0.025641	0.142857	0.125	0.047619	0.083333	0.090909	0.121212	0	0.15625	0.058824	0.028571	0.083333	0.119048	0.121212	0.195652	0	0.119048	0.114286	0.057143	0.153846	0.052632	0.136364	0.1875	0	0.116883	0.242424	0.285714	0.292683	0.272727	0.228571	0.275	0.183673	0.314286	0.073171	0.305556	0.317073	0.294118	0.292683	0.173077	0.289474	0.173077	0.314286	0.219512	0.146341	0.25	0
0.1125	0.126437	0	0.031746	0.017857	0.075472	0.081633	0.033898	0.056604	0.06	0.08	0	0.08	0.039216	0.019231	0.076923	0.103448	0.08	0.142857	0	0.103448	0.076923	0.038462	0.149254	0.036364	0.116667	0.1	0	0.157303	0.137255	0.192308	0.25	0.242857	0.153846	0.214286	0.153846	0.211538	0.070175	0.185185	0.245614	0.196078	0.22807	0.164179	0.222222	0.164179	0.188679	0.135593	0.103448	0.175439	0
0.203125	0.211268	0.194444	0.261905	0.046512	0.25	0.138889	0.139535	0.189189	0.051282	0.166667	0.15	0.2	0.108108	0.108108	0.023256	0.130435	0.166667	0.304348	0.152174	0.181818	0.189189	0.135135	0.666667	0.125	0.037736	0.162162	0.131579	0.034091	0.15	0.219512	0.288889	0.119403	0.230769	0.244444	0.05	0.243902	0.042553	0.268293	0.282609	0.195122	0.348837	0.571429	0.227273	0.178571	0.243902	0.018519	0.083333	0.375	0.166667
0.147541	0.144928	0.16129	0.277778	0.085714	0.151515	0	0.235294	0.15625	0.172414	0.060606	0.181818	0.09375	0.214286	0.214286	0.088235	0.153846	0.09375	0.12766	0.121951	0.125	0.088235	0.25	0.183673	0.1875	0.2	0.125	0.16129	0.135135	0.114286	0.131579	0.108696	0.133333	0.171429	0.113636	0.166667	0.1	0.166667	0.153846	0.106383	0.02439	0.159091	0.204082	0.093023	0.092593	0.157895	0.142857	0.125	0.2	0.206897
0.101695	0.121212	0.068966	0.078947	0.064516	0.1	0.115385	0.121212	0.103448	0.115385	0.111111	0.030303	0.071429	0.16	0.115385	0.142857	0.142857	0.071429	0.142857	0.025	0.111111	0.103448	0.153846	0.12766	0.137931	0.102564	0.107143	0.033333	0.082192	0.133333	0.1875	0.210526	0.145455	0.2	0.222222	0.133333	0.147059	0.088235	0.142857	0.175	0.15625	0.210526	0.125	0.2	0.148936	0.147059	0.131579	0.142857	0.162162	0.071429
0.046154	0.115942	0.0625	0.1	0.125	0.028571	0.066667	0.176471	0.029412	0	0	0.088235	0	0.066667	0.066667	0.09375	0.04878	0	0.159091	0.157895	0.075	0.060606	0.064516	0.076923	0.125	0.121951	0.030303	0.030303	0.123288	0.027778	0.051282	0.113636	0.064516	0.114286	0.044444	0.173913	0.02439	0.111111	0.02381	0.086957	0.025641	0.065217	0.075472	0.097561	0.357143	0.05	0.121951	0.04878	0.069767	0.137931
0.276923	0.260274	0.042553	0.072727	0.133333	0.108696	0.093023	0.145833	0.086957	0.068182	0.142857	0.04	0.090909	0.068182	0.068182	0.041667	0.26087	0.090909	0.269231	0.017241	0.234043	0.086957	0.066667	0.183333	0.0625	0.089286	0.113636	0.042553	0.227848	0.130435	0.191489	0.185185	0.35	0.125	0.215686	0.189655	0.163265	0.057692	0.16	0.203704	0.195652	0.230769	0.2	0.22449	0.2	0.163265	0.173077	0.234043	0.150943	0.043478
0.193548	0.220588	0.052632	0.086957	0.02439	0.135135	0.117647	0.069767	0.108108	0	0.114286	0.04878	0.147059	0.055556	0.027027	0.078947	0.195122	0.114286	0.23913	0.06383	0.166667	0.108108	0.054054	0.319149	0.076923	0.04	0.111111	0	0.073171	0.131579	0.236842	0.341463	0.220339	0.216216	0.261905	0.071429	0.263158	0.095238	0.25641	0.272727	0.277778	0.341463	0.340426	0.342105	0.188679	0.263158	0.04	0.113636	0.238095	0.114286
0.163043	0.208333	0.028169	0.064103	0.013514	0.086957	0.059701	0.039474	0.057143	0	0.074627	0.027027	0.074627	0.028986	0.014286	0.057143	0.123288	0.074627	0.153846	0.050633	0.108108	0.057143	0.028571	0.1875	0.041667	0.036585	0.073529	0	0.061404	0.085714	0.142857	0.222222	0.153846	0.130435	0.194444	0.056818	0.173913	0.053333	0.171429	0.171053	0.144928	0.205479	0.185185	0.150685	0.142857	0.157143	0.024096	0.078947	0.197183	0.043478
0.181818	0.191781	0.047619	0.08	0.022222	0.15	0.105263	0.086957	0.097561	0	0.102564	0.044444	0.131579	0	0	0.022727	0.152174	0.102564	0.22	0.08	0.152174	0.071429	0.02381	0.269231	0.095238	0.037037	0.1	0	0.045455	0.093023	0.214286	0.282609	0.151515	0.166667	0.212766	0.084746	0.238095	0.06383	0.204545	0.333333	0.219512	0.311111	0.288462	0.222222	0.155172	0.155556	0	0.104167	0.244444	0.102564
0.053333	0.113924	0.071429	0.145833	0.119048	0.044444	0	0.133333	0.045455	0.02381	0	0.043478	0	0.075	0.04878	0.121951	0.058824	0	0.107143	0.122449	0.058824	0	0.1	0.063492	0.119048	0.075472	0	0.022727	0.107143	0.066667	0.061224	0.052632	0.1	0.111111	0.035714	0.140351	0	0.133333	0.038462	0.051724	0.0625	0.052632	0.079365	0.076923	0.259259	0.06	0.096154	0.058824	0.055556	0.128205
0.185714	0.243243	0.042553	0.092593	0.02	0.133333	0.093023	0.018519	0.111111	0	0.142857	0.019608	0.090909	0.068182	0.044444	0.06383	0.16	0.090909	0.222222	0.035088	0.137255	0.086957	0.066667	0.267857	0.02	0.033898	0.113636	0	0.043011	0.130435	0.217391	0.28	0.191176	0.148936	0.291667	0.061538	0.266667	0.057692	0.234043	0.25	0.222222	0.333333	0.285714	0.25	0.125	0.212766	0.033898	0.09434	0.244898	0.043478
0.177419	0.205882	0.026316	0.020833	0.138889	0.138889	0.15625	0.071429	0.081081	0.057143	0.117647	0.05	0.151515	0.027778	0.057143	0.025641	0.2	0.117647	0.272727	0.020833	0.2	0.142857	0.055556	0.22	0.051282	0.0625	0.181818	0.026316	0.101266	0.2	0.210526	0.2	0.267857	0.128205	0.268293	0.072727	0.236842	0.046512	0.230769	0.25	0.285714	0.255814	0.215686	0.25	0.148148	0.27027	0.133333	0.170732	0.243902	0.027027
0.148148	0.145161	0.272727	0.1875	0.071429	0.428571	0.181818	0.172414	0.380952	0.130435	0.227273	0.192308	0.35	0.3	0.238095	0.115385	0.193548	0.35	0.216216	0.151515	0.193548	0.26087	0.285714	0.315789	0.2	0.111111	0.4	0.166667	0.041096	0.409091	0.4	0.34375	0.153846	0.434783	0.242424	0.090909	0.384615	0.133333	0.423077	0.189189	0.259259	0.34375	0.307692	0.3	0.243902	0.44	0.052632	0.121212	0.333333	0.285714
0.196078	0.206897	0.038462	0.027778	0.16	0.074074	0.315789	0.178571	0.076923	0.086957	0.083333	0.071429	0.083333	0	0.041667	0.037037	0.44	0.083333	0.257143	0.027778	0.5	0.272727	0.04	0.139535	0.115385	0.026316	0.125	0.08	0.102941	0.111111	0.133333	0.135135	0.204082	0.103448	0.142857	0.119048	0.206897	0.03125	0.090909	0.194444	0.178571	0.135135	0.086957	0.151515	0.111111	0.129032	0.114286	0.44	0.114286	0.04
0.140351	0.15625	0	0	0.064516	0.1	0.16	0.057143	0.066667	0.115385	0.111111	0.030303	0.111111	0.074074	0.074074	0.066667	0.212121	0.111111	0.170732	0	0.212121	0.103448	0.071429	0.081633	0.064516	0.131579	0.148148	0.033333	0.161765	0.172414	0.266667	0.179487	0.235294	0.2	0.157895	0.214286	0.181818	0.057143	0.142857	0.236842	0.233333	0.210526	0.102041	0.2	0.125	0.181818	0.264706	0.333333	0.162162	0
0.019231	0.050847	0.055556	0.074074	0	0.05	0	0	0.052632	0	0.058824	0	0	0.214286	0.133333	0.111111	0.037037	0	0.058824	0.035714	0	0	0.2	0.051282	0	0.148148	0	0	0.046875	0.047619	0.083333	0.0625	0.040816	0.090909	0.066667	0.054054	0	0.190476	0.037037	0	0.041667	0.0625	0.105263	0.111111	0.076923	0.125	0.068966	0	0.068966	0.058824
0.039216	0.050847	0.583333	0.318182	0.105263	0.4	0	0.25	0.428571	0.214286	0.058824	0.222222	0.2	0.545455	0.545455	0.111111	0.076923	0.2	0.090909	0.208333	0.037037	0.176471	0.636364	0.171429	0.3125	0.148148	0.1875	0.266667	0.030769	0.222222	0.238095	0.133333	0.02	0.333333	0.032258	0.114286	0.125	0.086957	0.166667	0.060606	0.041667	0.133333	0.2	0.111111	0.105263	0.173913	0.033333	0.037037	0.107143	0.5
0.033333	0.059701	0.217391	0.225806	0.034483	0.153846	0	0.259259	0.16	0.130435	0	0.192308	0.125	0.181818	0.181818	0.035714	0.027778	0.125	0.071429	0.310345	0.027778	0.115385	0.227273	0.136364	0.304348	0.111111	0.12	0.12	0.027027	0.148148	0.129032	0.131579	0.016949	0.178571	0.025	0.090909	0.090909	0.172414	0.121212	0.073171	0.030303	0.131579	0.159091	0.054054	0.275	0.125	0.025641	0.027778	0.111111	0.421053
0.166667	0.215385	0.058824	0.045455	0.027027	0.151515	0.172414	0.02439	0.121212	0	0.129032	0.026316	0.129032	0.096774	0.0625	0.088235	0.153846	0.129032	0.292683	0.022222	0.153846	0.121212	0.09375	0.288889	0.027027	0.043478	0.16129	0.028571	0.076923	0.181818	0.34375	0.378378	0.214286	0.242424	0.324324	0.076923	0.294118	0.076923	0.25	0.238095	0.354839	0.342105	0.311111	0.382353	0.18	0.294118	0.043478	0.097561	0.263158	0.029412
0.215686	0.20339	0.12	0.151515	0.153846	0.111111	0.181818	0.133333	0.16	0	0.173913	0.107143	0.08	0.083333	0.083333	0.035714	0.37037	0.125	0.363636	0.117647	0.37037	0.208333	0.125	0.282051	0.111111	0	0.12	0.076923	0.055556	0.107143	0.166667	0.131579	0.132075	0.137931	0.171429	0.116279	0.2	0.096774	0.121212	0.189189	0.172414	0.131579	0.243902	0.21875	0.186047	0.16129	0.025641	0.275862	0.142857	0.173913
0.122449	0.122807	0.105263	0.068966	0.045455	0.533333	0.1875	0.038462	0.294118	0	0.428571	0.090909	0.428571	0.1875	0.117647	0.1	0.153846	0.333333	0.151515	0.033333	0.111111	0.1	0.176471	0.162162	0.045455	0.064516	0.3125	0	0.045455	0.333333	0.272727	0.241379	0.12766	0.444444	0.214286	0.108108	0.16	0.125	0.304348	0.15625	0.227273	0.241379	0.189189	0.333333	0.189189	0.318182	0.064516	0.071429	0.269231	0.111111
0.20339	0.212121	0.057143	0.068182	0.026316	0.181818	0.129032	0.02381	0.151515	0	0.16129	0.025641	0.125	0.09375	0.060606	0.117647	0.210526	0.125	0.255814	0.021739	0.15	0.117647	0.090909	0.311111	0.026316	0.088889	0.121212	0	0.103896	0.142857	0.294118	0.268293	0.277778	0.235294	0.282051	0.096154	0.25	0.102564	0.210526	0.177778	0.30303	0.333333	0.363636	0.655172	0.176471	0.285714	0.042553	0.095238	0.25641	0.058824
[truncated: 395 more columns]

## Sheet: target similarity
Table S10 Enzymes (Es) dataset target-target similarity network
1	0.0257521	0.0215747	0.0193247	0.0266725	0.0152935	0.0234857	0.0243673	0.0228663	0.0197667	0.0216024	0.0213514	0.0201694	0.017395	0.0181424	0.0361002	0.0256161	0.017191	0.0211216	0.0175418	0.0183244	0.012631	0.022628	0.0156923	0.0135844	0.026613	0.0204412	0.0187939	0.0122886	0.0177111	0.0220606	0.0225351	0.0189672	0.0259126	0.0106475	0.0126029	0.0334514	0.0264814	0.0231354	0.0254913	0.0183296	0.024088	0.0191995	0.015213	0.0211333	0.0157393	0.0157295	0.0375091	0.0189879	0.0280645
0.0257521	1	0.0183252	0.0259402	0.0270214	0.0187892	0.0205699	0.024986	0.019592	0.0227429	0.0175417	0.0207332	0.0169664	0.0179881	0.0235801	0.0241215	0.020258	0.0136471	0.0288246	0.0123341	0.0204068	0.00989042	0.0151871	0.0196015	0.0166854	0.0131519	0.0149155	0.0175192	0.0133367	0.0216128	0.0153547	0.0270525	0.0162946	0.0231889	0.0130738	0.0135798	0.0229192	0.0190301	0.0168217	0.0346403	0.0142634	0.0196816	0.0271285	0.0200862	0.0160465	0.0100301	0.0163155	0.0388318	0.0150314	0.0246221
0.0215747	0.0183252	1	0.0162846	0.0207707	0.00885385	0.0177792	0.0169785	0.0162717	0.0177499	0.0153723	0.0164868	0.0152137	0.0115531	0.0196726	0.0198661	0.0250111	0.0128251	0.0169089	0.0122599	0.0136192	0.0108608	0.0134184	0.0123299	0.0100457	0.014698	0.0116368	0.0133738	0.0106052	0.0221511	0.0171519	0.0226851	0.0161965	0.0188785	0.0109247	0.0113475	0.0193408	0.0162745	0.0150912	0.0171319	0.0102078	0.01416	0.0183364	0.0133102	0.0129878	0.00967278	0.0122107	0.0261681	0.0137716	0.0180128
0.0193247	0.0259402	0.0162846	1	0.772951	0.070544	0.41193	0.594324	0.441991	0.422905	0.266042	0.322345	0.021557	0.0237179	0.0200917	0.0190537	0.0229922	0.0702462	0.0323989	0.0213899	0.0197463	0.0153646	0.0227665	0.0158531	0.0115983	0.0180821	0.0174283	0.0213114	0.013455	0.023901	0.0246619	0.0288287	0.0191459	0.0219805	0.0139678	0.0119631	0.0232766	0.0170741	0.0248034	0.030833	0.0126188	0.0171013	0.0250005	0.0187574	0.0880928	0.01416	0.0159201	0.0291138	0.0166228	0.0223277
0.0266725	0.0270214	0.0207707	0.772951	1	0.0685407	0.433581	0.604547	0.442158	0.422192	0.274244	0.326554	0.0229129	0.0196855	0.0198827	0.0207411	0.0215862	0.0654422	0.0299933	0.0150319	0.0203385	0.0134008	0.020683	0.0147277	0.0114776	0.017894	0.016323	0.0184055	0.0122907	0.0204987	0.0252055	0.0252991	0.0137457	0.0296066	0.01261	0.0130981	0.0255938	0.0165035	0.0231293	0.0212661	0.0137883	0.0210261	0.02573	0.0153871	0.0899985	0.0116773	0.0182052	0.0280906	0.0286084	0.0242511
0.0152935	0.0187892	0.00885385	0.070544	0.0685407	1	0.050664	0.0588967	0.0584081	0.049142	0.0363227	0.0451432	0.00997048	0.0103344	0.0137273	0.0160247	0.0204339	0.0851775	0.0133178	0.0350782	0.00944872	0.0087607	0.0100825	0.0107191	0.00671795	0.0148269	0.00967657	0.0122452	0.0084408	0.0162435	0.0133947	0.0133081	0.010333	0.013071	0.00936784	0.00843305	0.0139736	0.0135603	0.0136151	0.0150016	0.0113899	0.0163769	0.0124882	0.00842866	0.0255198	0.00962339	0.0111802	0.0159526	0.0132618	0.0202632
0.0234857	0.0205699	0.0177792	0.41193	0.433581	0.050664	1	0.383069	0.660439	0.297472	0.234182	0.263284	0.0192206	0.017291	0.0210022	0.0224666	0.0254886	0.0630921	0.0220792	0.0152302	0.0174229	0.0166326	0.0198033	0.0143056	0.0132096	0.0196987	0.0137612	0.0163717	0.0122038	0.028704	0.0186711	0.0272581	0.0188128	0.0293972	0.0144471	0.0132556	0.0208385	0.0183377	0.0196849	0.024788	0.0136908	0.0213866	0.0294786	0.0130957	0.0775302	0.0118266	0.0180765	0.0264617	0.0156233	0.0235445
0.0243673	0.024986	0.0169785	0.594324	0.604547	0.0588967	0.383069	1	0.395075	0.409144	0.256485	0.326266	0.0211206	0.0190938	0.019203	0.0261529	0.0276599	0.0610835	0.0193009	0.0151632	0.0213208	0.0142978	0.0149026	0.0200238	0.0139461	0.0188352	0.0177083	0.0205004	0.0118815	0.0206778	0.0274436	0.0222623	0.0153648	0.0316938	0.0144325	0.0134666	0.0268501	0.0154586	0.0299975	0.025649	0.0131215	0.0201752	0.0224609	0.011826	0.0936319	0.0134284	0.0257806	0.0276095	0.0205616	0.0239193
0.0228663	0.019592	0.0162717	0.441991	0.442158	0.0584081	0.660439	0.395075	1	0.297648	0.220431	0.278705	0.0171861	0.0182989	0.0184035	0.0186841	0.0304565	0.0630033	0.0219968	0.0142354	0.0212042	0.0132043	0.0178528	0.0151664	0.0128612	0.0157947	0.0154824	0.0159399	0.0133672	0.0269308	0.0193391	0.0223762	0.0219081	0.0210284	0.0117217	0.0121755	0.0227632	0.0189937	0.0191658	0.0232404	0.0150902	0.0282592	0.0200908	0.0125142	0.0760919	0.0126436	0.0175997	0.0362086	0.0193599	0.0182346
0.0197667	0.0227429	0.0177499	0.422905	0.422192	0.049142	0.297472	0.409144	0.297648	1	0.235218	0.295403	0.0173639	0.0180555	0.0213633	0.0198375	0.0289166	0.0660254	0.0207951	0.0137707	0.020512	0.0134962	0.0145068	0.0149708	0.0143929	0.0163704	0.0198733	0.0233087	0.0117336	0.01917	0.0228234	0.0201356	0.0184135	0.0355983	0.0136069	0.0127202	0.0268071	0.0169037	0.0198644	0.0285345	0.0143543	0.0187041	0.0212859	0.0132477	0.070382	0.0113572	0.0183348	0.0249227	0.0207344	0.0191513
0.0216024	0.0175417	0.0153723	0.266042	0.274244	0.0363227	0.234182	0.256485	0.220431	0.235218	1	0.206888	0.0178998	0.0180557	0.0178227	0.0217334	0.0204055	0.0382063	0.0168539	0.0204841	0.0215565	0.0102428	0.0155604	0.0145068	0.013893	0.0182441	0.012241	0.0173741	0.0148587	0.0254866	0.0165378	0.0201106	0.0177189	0.0321801	0.0117588	0.0124141	0.0166828	0.0206154	0.0202619	0.0176397	0.0113741	0.0203829	0.0184865	0.0106782	0.0590776	0.0120672	0.0141933	0.0223297	0.0130762	0.0201343
0.0213514	0.0207332	0.0164868	0.322345	0.326554	0.0451432	0.263284	0.326266	0.278705	0.295403	0.206888	1	0.0160475	0.0150362	0.0198574	0.0208505	0.0252788	0.0529463	0.0228736	0.0188308	0.0208794	0.0141905	0.018337	0.0161848	0.012951	0.0168552	0.0172368	0.0186914	0.0150242	0.0208764	0.0180578	0.024781	0.0181092	0.0201807	0.0107263	0.012051	0.0263379	0.0184447	0.0230092	0.0196141	0.0124466	0.0245353	0.0227797	0.0112442	0.0673708	0.0126492	0.0170658	0.0247071	0.0154948	0.0272425
0.0201694	0.0169664	0.0152137	0.021557	0.0229129	0.00997048	0.0192206	0.0211206	0.0171861	0.0173639	0.0178998	0.0160475	1	0.0148687	0.0132244	0.0158695	0.0163673	0.0104476	0.0215543	0.0135243	0.0159828	0.00950212	0.0165786	0.0102653	0.0146363	0.0174612	0.0135776	0.0169046	0.0114937	0.0206439	0.0144312	0.0185528	0.0220359	0.0184039	0.0114683	0.0109027	0.0164119	0.0157483	0.0215663	0.0240867	0.0100094	0.0172647	0.0166579	0.0115506	0.0123164	0.0114192	0.0148731	0.0230936	0.0137588	0.0233263
0.017395	0.0179881	0.0115531	0.0237179	0.0196855	0.0103344	0.017291	0.0190938	0.0182989	0.0180555	0.0180557	0.0150362	0.0148687	1	0.0172218	0.0162935	0.0206138	0.0131403	0.0214494	0.0179084	0.0168475	0.0130646	0.0133336	0.0191821	0.014226	0.016135	0.0113551	0.0159047	0.0108174	0.025031	0.0212045	0.0227402	0.0208311	0.0204207	0.0121074	0.0106412	0.0204453	0.0190149	0.0195788	0.0216613	0.0125892	0.0196956	0.0300254	0.0105058	0.0134886	0.0098664	0.0134458	0.0232365	0.0148328	0.0256646
0.0181424	0.0235801	0.0196726	0.0200917	0.0198827	0.0137273	0.0210022	0.019203	0.0184035	0.0213633	0.0178227	0.0198574	0.0132244	0.0172218	1	0.0258951	0.0200306	0.01515	0.0190864	0.0129025	0.0215649	0.0137145	0.0142658	0.014565	0.0129863	0.0153591	0.0126889	0.017773	0.0164838	0.0257155	0.0157969	0.0231013	0.015625	0.0223008	0.0122807	0.0164315	0.0215288	0.0188875	0.0287663	0.0277771	0.011835	0.0180475	0.017838	0.0129977	0.0174955	0.01303	0.0150252	0.0234931	0.0162681	0.0231285
0.0361002	0.0241215	0.0198661	0.0190537	0.0207411	0.0160247	0.0224666	0.0261529	0.0186841	0.0198375	0.0217334	0.0208505	0.0158695	0.0162935	0.0258951	1	0.023994	0.015583	0.0237409	0.014964	0.0171641	0.0140496	0.0215484	0.0168422	0.0112272	0.0212073	0.017674	0.0172371	0.0129799	0.0226222	0.0179851	0.0252269	0.0191875	0.0225381	0.0102053	0.0139731	0.0239895	0.0180397	0.0234763	0.0212242	0.0114459	0.0215818	0.0231896	0.0121473	0.0167958	0.0127323	0.0184168	0.0316895	0.0177855	0.0262875
0.0256161	0.020258	0.0250111	0.0229922	0.0215862	0.0204339	0.0254886	0.0276599	0.0304565	0.0289166	0.0204055	0.0252788	0.0163673	0.0206138	0.0200306	0.023994	1	0.0170362	0.0348922	0.0137993	0.020771	0.0161682	0.0166137	0.0216027	0.0179095	0.0276286	0.0178639	0.0163405	0.0166708	0.0230208	0.0217856	0.0331335	0.0162713	0.0586493	0.0126305	0.0178901	0.0260549	0.0376764	0.0352017	0.0563668	0.0163217	0.030353	0.023429	0.0127211	0.0211585	0.0138229	0.0219647	0.0255785	0.0241287	0.0261552
0.017191	0.0136471	0.0128251	0.0702462	0.0654422	0.0851775	0.0630921	0.0610835	0.0630033	0.0660254	0.0382063	0.0529463	0.0104476	0.0131403	0.01515	0.015583	0.0170362	1	0.0151006	0.0114934	0.0118649	0.00752535	0.0109886	0.011466	0.0079047	0.0128595	0.0108599	0.012676	0.00775929	0.0150587	0.011683	0.0136423	0.0155561	0.0189753	0.00961981	0.00818802	0.0138192	0.0114743	0.0132635	0.0140092	0.00831351	0.0129973	0.0177204	0.009016	0.0461304	0.00720579	0.0113806	0.0202391	0.0128068	0.0172214
0.0211216	0.0288246	0.0169089	0.0323989	0.0299933	0.0133178	0.0220792	0.0193009	0.0219968	0.0207951	0.0168539	0.0228736	0.0215543	0.0214494	0.0190864	0.0237409	0.0348922	0.0151006	1	0.0151284	0.0238507	0.0116272	0.0182138	0.0174686	0.0158747	0.0212242	0.0177732	0.0177026	0.0118214	0.0242657	0.0251874	0.514522	0.0171512	0.0285288	0.0142488	0.0182361	0.0284655	0.0197901	0.0232778	0.0218283	0.0147403	0.0231377	0.0280356	0.0123009	0.0154643	0.015438	0.0220405	0.0309856	0.0168847	0.0401472
0.0175418	0.0123341	0.0122599	0.0213899	0.0150319	0.0350782	0.0152302	0.0151632	0.0142354	0.0137707	0.0204841	0.0188308	0.0135243	0.0179084	0.0129025	0.014964	0.0137993	0.0114934	0.0151284	1	0.0126595	0.0094641	0.0124142	0.0113593	0.00844312	0.0118644	0.0101601	0.0133658	0.0108379	0.0173395	0.0146928	0.0174225	0.0127182	0.0233176	0.0123773	0.00877995	0.0152935	0.0163871	0.0182162	0.0123736	0.009554	0.0162796	0.0144755	0.0100337	0.0119065	0.00755917	0.0111138	0.0170365	0.0144683	0.0167721
0.0183244	0.0204068	0.0136192	0.0197463	0.0203385	0.00944872	0.0174229	0.0213208	0.0212042	0.020512	0.0215565	0.0208794	0.0159828	0.0168475	0.0215649	0.0171641	0.020771	0.0118649	0.0238507	0.0126595	1	0.0118859	0.0185288	0.0119169	0.0135086	0.0160528	0.013457	0.0167545	0.0103595	0.0195636	0.0158628	0.0209064	0.0165332	0.0244451	0.0121656	0.00978309	0.0190525	0.0200308	0.0187151	0.0183297	0.0145249	0.019918	0.0176165	0.01166	0.0208064	0.0102046	0.0138809	0.024478	0.0156253	0.0239834
0.012631	0.00989042	0.0108608	0.0153646	0.0134008	0.0087607	0.0166326	0.0142978	0.0132043	0.0134962	0.0102428	0.0141905	0.00950212	0.0130646	0.0137145	0.0140496	0.0161682	0.00752535	0.0116272	0.0094641	0.0118859	1	0.0123599	0.0110492	0.280435	0.0113906	0.00950137	0.0110276	0.254256	0.0137417	0.0123429	0.0146359	0.00971279	0.0161128	0.322454	0.326242	0.0173975	0.0102732	0.01086	0.0130537	0.279139	0.0163574	0.0163	0.290541	0.0101661	0.158021	0.00915317	0.0203376	0.0110323	0.012117
0.022628	0.0151871	0.0134184	0.0227665	0.020683	0.0100825	0.0198033	0.0149026	0.0178528	0.0145068	0.0155604	0.018337	0.0165786	0.0133336	0.0142658	0.0215484	0.0166137	0.0109886	0.0182138	0.0124142	0.0185288	0.0123599	1	0.0117565	0.011338	0.0169077	0.017079	0.0172411	0.0109375	0.0208759	0.0158905	0.0157318	0.617494	0.0185645	0.0125391	0.0105706	0.0172617	0.0156067	0.0166254	0.0187081	0.0113076	0.0157567	0.0344848	0.0102497	0.0131598	0.010501	0.0128557	0.0329256	0.0284064	0.0238274
0.0156923	0.0196015	0.0123299	0.0158531	0.0147277	0.0107191	0.0143056	0.0200238	0.0151664	0.0149708	0.0145068	0.0161848	0.0102653	0.0191821	0.014565	0.0168422	0.0216027	0.011466	0.0174686	0.0113593	0.0119169	0.0110492	0.0117565	1	0.0101674	0.0133932	0.0110039	0.0109602	0.00914868	0.015365	0.0150744	0.0220296	0.0130322	0.0164854	0.00976701	0.00932691	0.126027	0.0148052	0.0131854	0.0189203	0.0101401	0.119266	0.0147861	0.00840913	0.0110003	0.00910292	0.0109167	0.0196519	0.0134738	0.07982
0.0135844	0.0166854	0.0100457	0.0115983	0.0114776	0.00671795	0.0132096	0.0139461	0.0128612	0.0143929	0.013893	0.012951	0.0146363	0.014226	0.0129863	0.0112272	0.0179095	0.0079047	0.0158747	0.00844312	0.0135086	0.280435	0.011338	0.0101674	1	0.0125592	0.0102694	0.0127858	0.278232	0.0127968	0.0107996	0.0125355	0.0108146	0.0150304	0.309835	0.314362	0.0159845	0.00998276	0.0144903	0.0134578	0.522274	0.0187286	0.0154515	0.29409	0.0104562	0.167368	0.0107474	0.0160114	0.0092743	0.013406
0.026613	0.0131519	0.014698	0.0180821	0.017894	0.0148269	0.0196987	0.0188352	0.0157947	0.0163704	0.0182441	0.0168552	0.0174612	0.016135	0.0153591	0.0212073	0.0276286	0.0128595	0.0212242	0.0118644	0.0160528	0.0113906	0.0169077	0.0133932	0.0125592	1	0.0140989	0.016343	0.0113177	0.0178387	0.0176837	0.0212427	0.0140746	0.0252755	0.00861302	0.0117297	0.0202007	0.0136462	0.0201183	0.0167849	0.0156056	0.017405	0.0214799	0.00944593	0.0133653	0.00958531	0.0179613	0.0221714	0.0174996	0.0195663
0.0204412	0.0149155	0.0116368	0.0174283	0.016323	0.00967657	0.0137612	0.0177083	0.0154824	0.0198733	0.012241	0.0172368	0.0135776	0.0113551	0.0126889	0.017674	0.0178639	0.0108599	0.0177732	0.0101601	0.013457	0.00950137	0.017079	0.0110039	0.0102694	0.0140989	1	0.0148561	0.0113606	0.0197069	0.0122506	0.0195093	0.0141612	0.0196337	0.00894066	0.00881452	0.0188722	0.0112951	0.0171081	0.0144446	0.00894134	0.0163437	0.0148417	0.00961531	0.0123453	0.00875646	0.0148767	0.0184539	0.0120671	0.0175117
0.0187939	0.0175192	0.0133738	0.0213114	0.0184055	0.0122452	0.0163717	0.0205004	0.0159399	0.0233087	0.0173741	0.0186914	0.0169046	0.0159047	0.017773	0.0172371	0.0163405	0.012676	0.0177026	0.0133658	0.0167545	0.0110276	0.0172411	0.0109602	0.0127858	0.016343	0.0148561	1	0.011953	0.0192198	0.0140073	0.0192643	0.0132957	0.0249148	0.0105655	0.0129341	0.0207089	0.0134515	0.0172605	0.0194228	0.0135612	0.0191516	0.0207883	0.0115914	0.0214697	0.00926681	0.0182497	0.0285796	0.0208667	0.0184484
0.0122886	0.0133367	0.0106052	0.013455	0.0122907	0.0084408	0.0122038	0.0118815	0.0133672	0.0117336	0.0148587	0.0150242	0.0114937	0.0108174	0.0164838	0.0129799	0.0166708	0.00775929	0.0118214	0.0108379	0.0103595	0.254256	0.0109375	0.00914868	0.278232	0.0113177	0.0113606	0.011953	1	0.0128345	0.0116402	0.0114659	0.0106156	0.0163235	0.285867	0.279658	0.0138289	0.00959498	0.0125071	0.0156121	0.268971	0.0149204	0.0164526	0.296167	0.0131965	0.16077	0.00891265	0.0205816	0.0122621	0.0151193
0.0177111	0.0216128	0.0221511	0.023901	0.0204987	0.0162435	0.028704	0.0206778	0.0269308	0.01917	0.0254866	0.0208764	0.0206439	0.025031	0.0257155	0.0226222	0.0230208	0.0150587	0.0242657	0.0173395	0.0195636	0.0137417	0.0208759	0.015365	0.0127968	0.0178387	0.0197069	0.0192198	0.0128345	1	0.0162137	0.0269804	0.022583	0.0244861	0.0137066	0.012894	0.0218358	0.0171813	0.0322174	0.0192282	0.0188663	0.0240641	0.02058	0.0130236	0.0163868	0.0129514	0.0186683	0.0337982	0.0179244	0.0275869
0.0220606	0.0153547	0.0171519	0.0246619	0.0252055	0.0133947	0.0186711	0.0274436	0.0193391	0.0228234	0.0165378	0.0180578	0.0144312	0.0212045	0.0157969	0.0179851	0.0217856	0.011683	0.0251874	0.0146928	0.0158628	0.0123429	0.0158905	0.0150744	0.0107996	0.0176837	0.0122506	0.0140073	0.0116402	0.0162137	1	0.0310243	0.0177931	0.0215815	0.0104333	0.0114506	0.0315802	0.016268	0.0183926	0.0176386	0.011193	0.0241456	0.0204854	0.0134822	0.0229104	0.0115648	0.0147785	0.0239727	0.014805	0.0214363
0.0225351	0.0270525	0.0226851	0.0288287	0.0252991	0.0133081	0.0272581	0.0222623	0.0223762	0.0201356	0.0201106	0.024781	0.0185528	0.0227402	0.0231013	0.0252269	0.0331335	0.0136423	0.514522	0.0174225	0.0209064	0.0146359	0.0157318	0.0220296	0.0125355	0.0212427	0.0195093	0.0192643	0.0114659	0.0269804	0.0310243	1	0.0178528	0.0270561	0.015891	0.0184318	0.0223621	0.0205995	0.0273232	0.0282752	0.0139225	0.0257645	0.0194549	0.0120038	0.0202066	0.0160694	0.0179713	0.0401196	0.0222621	0.032372
0.0189672	0.0162946	0.0161965	0.0191459	0.0137457	0.010333	0.0188128	0.0153648	0.0219081	0.0184135	0.0177189	0.0181092	0.0220359	0.0208311	0.015625	0.0191875	0.0162713	0.0155561	0.0171512	0.0127182	0.0165332	0.00971279	0.617494	0.0130322	0.0108146	0.0140746	0.0141612	0.0132957	0.0106156	0.022583	0.0177931	0.0178528	1	0.0296041	0.0115159	0.00968324	0.0250798	0.0145134	0.0185019	0.0226511	0.0101972	0.0166222	0.0294653	0.00938929	0.0141824	0.0105625	0.0150423	0.0195455	0.0272252	0.0259983
0.0259126	0.0231889	0.0188785	0.0219805	0.0296066	0.013071	0.0293972	0.0316938	0.0210284	0.0355983	0.0321801	0.0201807	0.0184039	0.0204207	0.0223008	0.0225381	0.0586493	0.0189753	0.0285288	0.0233176	0.0244451	0.0161128	0.0185645	0.0164854	0.0150304	0.0252755	0.0196337	0.0249148	0.0163235	0.0244861	0.0215815	0.0270561	0.0296041	1	0.0163511	0.0135872	0.0238464	0.146445	0.0271981	0.11562	0.0204121	0.0226335	0.0303306	0.0164685	0.019222	0.0180379	0.0197435	0.0441511	0.0214819	0.02907
0.0106475	0.0130738	0.0109247	0.0139678	0.01261	0.00936784	0.0144471	0.0144325	0.0117217	0.0136069	0.0117588	0.0107263	0.0114683	0.0121074	0.0122807	0.0102053	0.0126305	0.00961981	0.0142488	0.0123773	0.0121656	0.322454	0.0125391	0.00976701	0.309835	0.00861302	0.00894066	0.0105655	0.285867	0.0137066	0.0104333	0.015891	0.0115159	0.0163511	1	0.626001	0.0148597	0.00986032	0.0118449	0.0134207	0.282379	0.0138781	0.0129035	0.318941	0.00910329	0.151454	0.0158479	0.0163023	0.0126686	0.0127278
0.0126029	0.0135798	0.0113475	0.0119631	0.0130981	0.00843305	0.0132556	0.0134666	0.0121755	0.0127202	0.0124141	0.012051	0.0109027	0.0106412	0.0164315	0.0139731	0.0178901	0.00818802	0.0182361	0.00877995	0.00978309	0.326242	0.0105706	0.00932691	0.314362	0.0117297	0.00881452	0.0129341	0.279658	0.012894	0.0114506	0.0184318	0.00968324	0.0135872	0.626001	1	0.0130804	0.0110453	0.0127858	0.0129951	0.292777	0.0146774	0.015426	0.318554	0.0104173	0.156838	0.0127039	0.0180376	0.00986923	0.012945
0.0334514	0.0229192	0.0193408	0.0232766	0.0255938	0.0139736	0.0208385	0.0268501	0.0227632	0.0268071	0.0166828	0.0263379	0.0164119	0.0204453	0.0215288	0.0239895	0.0260549	0.0138192	0.0284655	0.0152935	0.0190525	0.0173975	0.0172617	0.126027	0.0159845	0.0202007	0.0188722	0.0207089	0.0138289	0.0218358	0.0315802	0.0223621	0.0250798	0.0238464	0.0148597	0.0130804	1	0.0175486	0.0205903	0.0249677	0.0126993	0.200799	0.0210701	0.0109077	0.0192155	0.0157663	0.0145445	0.0261825	0.0245128	0.282095
0.0264814	0.0190301	0.0162745	0.0170741	0.0165035	0.0135603	0.0183377	0.0154586	0.0189937	0.0169037	0.0206154	0.0184447	0.0157483	0.0190149	0.0188875	0.0180397	0.0376764	0.0114743	0.0197901	0.0163871	0.0200308	0.0102732	0.0156067	0.0148052	0.00998276	0.0136462	0.0112951	0.0134515	0.00959498	0.0171813	0.016268	0.0205995	0.0145134	0.146445	0.00986032	0.0110453	0.0175486	1	0.0180641	0.0858806	0.0107857	0.0196257	0.0248535	0.0103205	0.0120006	0.0113582	0.0122816	0.0281386	0.0134002	0.0197645
0.0231354	0.0168217	0.0150912	0.0248034	0.0231293	0.0136151	0.0196849	0.0299975	0.0191658	0.0198644	0.0202619	0.0230092	0.0215663	0.0195788	0.0287663	0.0234763	0.0352017	0.0132635	0.0232778	0.0182162	0.0187151	0.01086	0.0166254	0.0131854	0.0144903	0.0201183	0.0171081	0.0172605	0.0125071	0.0322174	0.0183926	0.0273232	0.0185019	0.0271981	0.0118449	0.0127858	0.0205903	0.0180641	1	0.0203674	0.0109631	0.0235757	0.0199037	0.0130994	0.0201223	0.0129732	0.0211242	0.0303528	0.0167822	0.0340652
0.0254913	0.0346403	0.0171319	0.030833	0.0212661	0.0150016	0.024788	0.025649	0.0232404	0.0285345	0.0176397	0.0196141	0.0240867	0.0216613	0.0277771	0.0212242	0.0563668	0.0140092	0.0218283	0.0123736	0.0183297	0.0130537	0.0187081	0.0189203	0.0134578	0.0167849	0.0144446	0.0194228	0.0156121	0.0192282	0.0176386	0.0282752	0.0226511	0.11562	0.0134207	0.0129951	0.0249677	0.0858806	0.0203674	1	0.0119575	0.0206849	0.0208863	0.0121424	0.0164722	0.0146777	0.0259436	0.0283764	0.0147593	0.0222424
0.0183296	0.0142634	0.0102078	0.0126188	0.0137883	0.0113899	0.0136908	0.0131215	0.0150902	0.0143543	0.0113741	0.0124466	0.0100094	0.0125892	0.011835	0.0114459	0.0163217	0.00831351	0.0147403	0.009554	0.0145249	0.279139	0.0113076	0.0101401	0.522274	0.0156056	0.00894134	0.0135612	0.268971	0.0188663	0.011193	0.0139225	0.0101972	0.0204121	0.282379	0.292777	0.0126993	0.0107857	0.0109631	0.0119575	1	0.0143472	0.0148877	0.262359	0.00943504	0.160878	0.00905532	0.0167288	0.0118921	0.0128011
0.024088	0.0196816	0.01416	0.0171013	0.0210261	0.0163769	0.0213866	0.0201752	0.0282592	0.0187041	0.0203829	0.0245353	0.0172647	0.0196956	0.0180475	0.0215818	0.030353	0.0129973	0.0231377	0.0162796	0.019918	0.0163574	0.0157567	0.119266	0.0187286	0.017405	0.0163437	0.0191516	0.0149204	0.0240641	0.0241456	0.0257645	0.0166222	0.0226335	0.0138781	0.0146774	0.200799	0.0196257	0.0235757	0.0206849	0.0143472	1	0.0211095	0.0155025	0.0156621	0.0143377	0.0149359	0.0284798	0.0160003	0.242247
0.0191995	0.0271285	0.0183364	0.0250005	0.02573	0.0124882	0.0294786	0.0224609	0.0200908	0.0212859	0.0184865	0.0227797	0.0166579	0.0300254	0.017838	0.0231896	0.023429	0.0177204	0.0280356	0.0144755	0.0176165	0.0163	0.0344848	0.0147861	0.0154515	0.0214799	0.0148417	0.0207883	0.0164526	0.02058	0.0204854	0.0194549	0.0294653	0.0303306	0.0129035	0.015426	0.0210701	0.0248535	0.0199037	0.0208863	0.0148877	0.0211095	1	0.0125056	0.0176303	0.011958	0.0161685	0.0325408	0.0172331	0.0302988
0.015213	0.0200862	0.0133102	0.0187574	0.0153871	0.00842866	0.0130957	0.011826	0.0125142	0.0132477	0.0106782	0.0112442	0.0115506	0.0105058	0.0129977	0.0121473	0.0127211	0.009016	0.0123009	0.0100337	0.01166	0.290541	0.0102497	0.00840913	0.29409	0.00944593	0.00961531	0.0115914	0.296167	0.0130236	0.0134822	0.0120038	0.00938929	0.0164685	0.318941	0.318554	0.0109077	0.0103205	0.0130994	0.0121424	0.262359	0.0155025	0.0125056	1	0.00916862	0.157517	0.0097158	0.0214164	0.0101013	0.0130862
0.0211333	0.0160465	0.0129878	0.0880928	0.0899985	0.0255198	0.0775302	0.0936319	0.0760919	0.070382	0.0590776	0.0673708	0.0123164	0.0134886	0.0174955	0.0167958	0.0211585	0.0461304	0.0154643	0.0119065	0.0208064	0.0101661	0.0131598	0.0110003	0.0104562	0.0133653	0.0123453	0.0214697	0.0131965	0.0163868	0.0229104	0.0202066	0.0141824	0.019222	0.00910329	0.0104173	0.0192155	0.0120006	0.0201223	0.0164722	0.00943504	0.0156621	0.0176303	0.00916862	1	0.0102531	0.0111377	0.0233724	0.015472	0.01543
0.0157393	0.0100301	0.00967278	0.01416	0.0116773	0.00962339	0.0118266	0.0134284	0.0126436	0.0113572	0.0120672	0.0126492	0.0114192	0.0098664	0.01303	0.0127323	0.0138229	0.00720579	0.015438	0.00755917	0.0102046	0.158021	0.010501	0.00910292	0.167368	0.00958531	0.00875646	0.00926681	0.16077	0.0129514	0.0115648	0.0160694	0.0105625	0.0180379	0.151454	0.156838	0.0157663	0.0113582	0.0129732	0.0146777	0.160878	0.0143377	0.011958	0.157517	0.0102531	1	0.00929037	0.0184308	0.0106757	0.0125132
0.0157295	0.0163155	0.0122107	0.0159201	0.0182052	0.0111802	0.0180765	0.0257806	0.0175997	0.0183348	0.0141933	0.0170658	0.0148731	0.0134458	0.0150252	0.0184168	0.0219647	0.0113806	0.0220405	0.0111138	0.0138809	0.00915317	0.0128557	0.0109167	0.0107474	0.0179613	0.0148767	0.0182497	0.00891265	0.0186683	0.0147785	0.0179713	0.0150423	0.0197435	0.0158479	0.0127039	0.0145445	0.0122816	0.0211242	0.0259436	0.00905532	0.0149359	0.0161685	0.0097158	0.0111377	0.00929037	1	0.0230242	0.0134633	0.0199065
0.0375091	0.0388318	0.0261681	0.0291138	0.0280906	0.0159526	0.0264617	0.0276095	0.0362086	0.0249227	0.0223297	0.0247071	0.0230936	0.0232365	0.0234931	0.0316895	0.0255785	0.0202391	0.0309856	0.0170365	0.024478	0.0203376	0.0329256	0.0196519	0.0160114	0.0221714	0.0184539	0.0285796	0.0205816	0.0337982	0.0239727	0.0401196	0.0195455	0.0441511	0.0163023	0.0180376	0.0261825	0.0281386	0.0303528	0.0283764	0.0167288	0.0284798	0.0325408	0.0214164	0.0233724	0.0184308	0.0230242	1	0.0256082	0.0330786
0.0189879	0.0150314	0.0137716	0.0166228	0.0286084	0.0132618	0.0156233	0.0205616	0.0193599	0.0207344	0.0130762	0.0154948	0.0137588	0.0148328	0.0162681	0.0177855	0.0241287	0.0128068	0.0168847	0.0144683	0.0156253	0.0110323	0.0284064	0.0134738	0.0092743	0.0174996	0.0120671	0.0208667	0.0122621	0.0179244	0.014805	0.0222621	0.0272252	0.0214819	0.0126686	0.00986923	0.0245128	0.0134002	0.0167822	0.0147593	0.0118921	0.0160003	0.0172331	0.0101013	0.015472	0.0106757	0.0134633	0.0256082	1	0.0191602
0.0280645	0.0246221	0.0180128	0.0223277	0.0242511	0.0202632	0.0235445	0.0239193	0.0182346	0.0191513	0.0201343	0.0272425	0.0233263	0.0256646	0.0231285	0.0262875	0.0261552	0.0172214	0.0401472	0.0167721	0.0239834	0.012117	0.0238274	0.07982	0.013406	0.0195663	0.0175117	0.0184484	0.0151193	0.0275869	0.0214363	0.032372	0.0259983	0.02907	0.0127278	0.012945	0.282095	0.0197645	0.0340652	0.0222424	0.0128011	0.242247	0.0302988	0.0130862	0.01543	0.0125132	0.0199065	0.0330786	0.0191602	1
0.0258063	0.0247144	0.0144977	0.0179219	0.0203957	0.0150728	0.0268553	0.020574	0.0184315	0.0190738	0.0144506	0.0168102	0.0152822	0.0163474	0.0163647	0.0186593	0.032541	0.0119702	0.020935	0.015731	0.0165033	0.0141423	0.0142875	0.017858	0.0150191	0.0150481	0.0155159	0.0172481	0.0140517	0.0250612	0.015477	0.0198543	0.017045	0.0195685	0.0124351	0.0111036	0.0239459	0.0162611	0.0208078	0.0278656	0.0121703	0.0286042	0.0258184	0.0107665	0.0163623	0.0163881	0.015748	0.0246232	0.0160856	0.0286045
0.0253435	0.0251095	0.014814	0.0192584	0.0199444	0.0111859	0.0268446	0.0214599	0.0184242	0.0190662	0.0140925	0.0204042	0.0149208	0.0163409	0.0178799	0.017804	0.032528	0.0139189	0.0218567	0.0148971	0.0164967	0.0125145	0.0162747	0.0198663	0.0150131	0.0178407	0.0155097	0.0172412	0.0103619	0.0264692	0.0158306	0.0217826	0.0170382	0.0201041	0.0111217	0.0113257	0.0239364	0.0162546	0.0224974	0.0278545	0.0123994	0.0281316	0.0258081	0.00878551	0.0126899	0.0136513	0.0157417	0.0252611	0.0141497	0.0285931
0.0249607	0.0296473	0.0155014	0.0193123	0.0231114	0.0107594	0.0269198	0.0170367	0.0184758	0.0191196	0.0151919	0.0200602	0.0149626	0.0163866	0.017167	0.0178539	0.0315669	0.0146926	0.0195863	0.0154921	0.015464	0.0116199	0.0169864	0.0193445	0.0150552	0.0178906	0.0155531	0.0165979	0.0110837	0.0236994	0.0155142	0.0179603	0.017086	0.0207053	0.0107155	0.00999454	0.0240034	0.0173632	0.0217091	0.0266818	0.0114957	0.0286729	0.0245418	0.0107924	0.0124426	0.0172699	0.0154701	0.02793	0.0161242	0.0291592
0.0244057	0.0318027	0.0185859	0.0207628	0.0255786	0.0142547	0.0216506	0.0274941	0.0206742	0.0176464	0.0173329	0.018169	0.0168055	0.0193252	0.0151167	0.0176466	0.0218402	0.0133998	0.0202387	0.0117452	0.0203577	0.0151289	0.0197968	0.0141648	0.0108749	0.0195268	0.0128396	0.0199006	0.0126356	0.0196763	0.0241681	0.0187767	0.0189646	0.0277597	0.0123792	0.0141442	0.0217753	0.0260766	0.0257025	0.0232066	0.0112884	0.0170164	0.0239961	0.0122602	0.0146739	0.0111273	0.0193613	0.0300277	0.0155168	0.0275105
0.0227052	0.0215377	0.0158339	0.017077	0.0177887	0.0132856	0.0234034	0.0197386	0.0202066	0.0170516	0.0159081	0.0188679	0.0178234	0.0160549	0.0171774	0.0221181	0.0284273	0.0151915	0.0223978	0.013287	0.0201513	0.0118595	0.0193295	0.0182005	0.0141227	0.0186034	0.0147288	0.0145319	0.0127077	0.0270336	0.0140795	0.0184568	0.0194428	0.0196273	0.0129101	0.0106824	0.0249417	0.0166645	0.0187407	0.0333723	0.0122069	0.0208235	0.0227706	0.0110193	0.0149967	0.0115905	0.0148476	0.0331462	0.0154886	0.0320944
0.0264616	0.0358586	0.0220581	0.0299282	0.0347998	0.0255518	0.0286723	0.0268881	0.0300635	0.0304669	0.0264858	0.0240615	0.0255201	0.0278676	0.0305056	0.032576	0.0271705	0.0187655	0.0310755	0.0276522	0.0299557	0.0189708	0.02053	0.0259736	0.0176349	0.0268825	0.0212835	0.0334115	0.0176952	0.0300059	0.0258454	0.0274946	0.0200922	0.0844182	0.0262304	0.017407	0.026146	0.0466354	0.037584	0.047228	0.0183693	0.0277356	0.0267609	0.019447	0.0244973	0.0235075	0.0210384	0.0411189	0.0263245	0.0445289
0.0171766	0.0150296	0.0171121	0.0196427	0.0213074	0.0261856	0.0230126	0.0173457	0.019876	0.0167801	0.0208006	0.0141725	0.0119854	0.0186636	0.0176473	0.0196643	0.0181425	0.0144171	0.0172579	0.0258273	0.0148212	0.0144643	0.0140066	0.0184556	0.0118711	0.340482	0.0135485	0.0197767	0.0104874	0.0199329	0.0224556	0.0191886	0.0143705	0.0210809	0.0115875	0.0105076	0.025624	0.0169879	0.0186169	0.0196361	0.015391	0.023338	0.017639	0.0116707	0.0126057	0.011691	0.0183223	0.0218522	0.0170876	0.0196199
0.0197454	0.0192406	0.0174855	0.0230146	0.0189076	0.0117308	0.020054	0.0281758	0.0228485	0.0217008	0.0146884	0.0228864	0.0151556	0.0148533	0.0195488	0.0213722	0.0244165	0.0134953	0.0184862	0.0403888	0.022601	0.0116842	0.0173894	0.0120036	0.0127366	0.0176368	0.0139635	0.0200597	0.0127256	0.0219973	0.0261627	0.020181	0.0145762	0.0194922	0.0122633	0.00988288	0.0214226	0.0212415	0.0201664	0.0157203	0.010661	0.0201212	0.0211398	0.0117124	0.0128504	0.0122177	0.0140416	0.0270043	0.0162134	0.0234939
0.0188305	0.016149	0.0170289	0.0687173	0.063392	0.0265169	0.0617994	0.0499941	0.0527412	0.0585646	0.0494751	0.0690153	0.0175534	0.0135748	0.017148	0.02315	0.0300159	0.0389486	0.0201558	0.011957	0.0183414	0.0104463	0.0120923	0.0142261	0.0126074	0.0130392	0.0129644	0.0188313	0.0131739	0.0217155	0.0143465	0.0188822	0.0167967	0.0230792	0.00850661	0.0117812	0.0231433	0.0162344	0.0187659	0.0180191	0.0107484	0.0247856	0.0162002	0.010662	0.0371561	0.0101951	0.0166477	0.021336	0.0161683	0.0222652
0.0241419	0.0300059	0.0181338	0.0207945	0.018389	0.0108247	0.0217368	0.0207579	0.0169309	0.0233389	0.0163579	0.0221328	0.013687	0.01547	0.0184146	0.0196819	0.0238409	0.0137501	0.017457	0.0119911	0.0177137	0.0121337	0.0177178	0.0219007	0.0134406	0.0172787	0.0177839	0.0173727	0.0106912	0.0242803	0.0191928	0.0191274	0.0191418	0.0230808	0.0103405	0.0118596	0.0231913	0.0258315	0.0251598	0.02957	0.0131734	0.0195899	0.019341	0.0104147	0.0136502	0.0132782	0.0139957	0.0339128	0.0149311	0.028725
0.0259373	0.029369	0.0210937	0.0251445	0.0217725	0.0146855	0.0216186	0.0235315	0.0225519	0.0334507	0.0206039	0.0252694	0.0203606	0.0187147	0.0235827	0.0302447	0.0337504	0.0157089	0.0223009	0.0148428	0.0276843	0.0143663	0.0174815	0.0161644	0.0189317	0.0212762	0.0184646	0.0213759	0.0129276	0.0348292	0.0168328	0.0334041	0.0226638	0.0203368	0.0140286	0.0145716	0.0231512	0.0157055	0.0263138	0.0209093	0.018881	0.0291279	0.0244611	0.0113034	0.0191303	0.0179323	0.0158344	0.0257583	0.0188068	0.0260746
0.0218815	0.0225613	0.0169249	0.0263621	0.0246903	0.0100778	0.0268285	0.0319549	0.0216174	0.0213473	0.0274033	0.0218673	0.0175502	0.0161023	0.0187935	0.0182681	0.023161	0.0115501	0.0185743	0.0144984	0.0203552	0.0133975	0.0244374	0.0139209	0.0143008	0.0205907	0.0148466	0.0166724	0.0125856	0.0238471	0.0196648	0.0208604	0.0214203	0.0257002	0.0128361	0.0138091	0.0198372	0.019685	0.0178467	0.0187901	0.0140165	0.0213285	0.0224497	0.0126973	0.0183771	0.0123621	0.0198553	0.03336	0.023661	0.0269977
0.0242964	0.0307231	0.0210479	0.0277033	0.033105	0.0143872	0.0190035	0.0250457	0.0205026	0.0188658	0.0209703	0.0294168	0.0219748	0.0222499	0.0239755	0.0232526	0.0275539	0.0136798	0.0287653	0.0148106	0.022183	0.0127122	0.0186064	0.0151212	0.0161528	0.0183721	0.0145457	0.0189148	0.0171994	0.0248239	0.0172161	0.0242925	0.0175458	0.0221951	0.0137436	0.0140112	0.0333083	0.0197954	0.0227887	0.0349348	0.0166556	0.0269117	0.0244079	0.0148676	0.0213926	0.0134812	0.0224139	0.0362856	0.0183906	0.021493
0.0185227	0.0184175	0.0202105	0.0207747	0.0201555	0.0105891	0.0208135	0.0182984	0.0218234	0.0229959	0.015381	0.0276553	0.0184176	0.0198165	0.0159162	0.022362	0.0262447	0.0139922	0.0389125	0.0163093	0.0195706	0.0103283	0.0214481	0.0130934	0.0102411	0.0178173	0.017633	0.0166222	0.00942441	0.0219248	0.0157073	0.0281768	0.0167121	0.0266864	0.0122972	0.0119492	0.0184214	0.0147839	0.0181455	0.0147468	0.0112775	0.0188752	0.019426	0.0121857	0.0164149	0.010506	0.0140311	0.0270994	0.0248615	0.0202759
0.0247632	0.0208306	0.0204409	0.0264669	0.0252215	0.0157389	0.0245615	0.0225063	0.0215693	0.0213188	0.0196634	0.0205781	0.017495	0.0178827	0.0216486	0.0176283	0.0223918	0.0144306	0.030026	0.0156989	0.0164834	0.0142025	0.0225354	0.0141788	0.0156595	0.0156958	0.01667	0.0192454	0.0125996	0.0248286	0.0291363	0.0227785	0.0325389	0.0214064	0.0119325	0.013138	0.0196462	0.022042	0.0250847	0.0200185	0.0143374	0.0181688	0.0194781	0.0156235	0.0231453	0.0135604	0.0172271	0.0333153	0.0151328	0.0296999
0.0219466	0.020795	0.0143923	0.0200155	0.0189644	0.0158459	0.0196673	0.0216808	0.0199634	0.0161588	0.0190952	0.0201625	0.0172279	0.021041	0.0159162	0.0217661	0.0199547	0.0111453	0.0234359	0.0162637	0.0204602	0.0118996	0.0157908	0.0145098	0.0104835	0.0182946	0.0126408	0.0173777	0.0126991	0.0229214	0.0208686	0.0220931	0.0165187	0.0211829	0.0122341	0.0118461	0.0196964	0.0147839	0.0177594	0.0189749	0.0109003	0.0197331	0.0190397	0.01086	0.0142115	0.0115827	0.01886	0.0289471	0.0143718	0.027649
0.0171274	0.01604	0.0158726	0.0161614	0.0253552	0.0116533	0.0174295	0.0208549	0.0181011	0.0182398	0.0198451	0.0179583	0.0143829	0.019176	0.0200893	0.0156698	0.0212407	0.0146145	0.0192367	0.0182102	0.0145192	0.0157056	0.0140314	0.013177	0.0115617	0.013239	0.0143818	0.0145675	0.0145917	0.0257922	0.0196328	0.0195975	0.0205825	0.0234328	0.0153545	0.0113636	0.021067	0.0155501	0.0205478	0.0201246	0.010913	0.0166415	0.019973	0.00908552	0.0178699	0.0105361	0.0169027	0.0267936	0.0195293	0.0166348
0.0155114	0.0133144	0.0114884	0.0134709	0.018601	0.0130938	0.0153912	0.0197017	0.0158844	0.0156558	0.0179899	0.0145522	0.0109338	0.0102395	0.0135711	0.0163083	0.017982	0.0100777	0.0208182	0.0102273	0.01179	0.00940205	0.0137071	0.0108752	0.0111577	0.013458	0.0102676	0.0154367	0.00950289	0.0122329	0.0148482	0.0182838	0.0123853	0.017483	0.00899974	0.00792212	0.0135232	0.0148302	0.0151427	0.0148309	0.00949136	0.0161291	0.0130723	0.00952522	0.0155829	0.00896123	0.014975	0.0222004	0.011697	0.0257631
0.0249332	0.0180333	0.0121524	0.0206185	0.0170591	0.0130938	0.0189312	0.0188952	0.0155217	0.016579	0.0146241	0.0196264	0.0147463	0.0123325	0.0137812	0.0182356	0.0158381	0.0123476	0.0178992	0.0114511	0.0138034	0.0113687	0.0122826	0.0123857	0.0115075	0.0145205	0.0123323	0.0143132	0.00973179	0.0181928	0.0179212	0.0164395	0.0163887	0.0221439	0.0111915	0.0109409	0.0218863	0.0146676	0.0233861	0.0266696	0.00988757	0.013574	0.0174626	0.00878537	0.0114925	0.00871769	0.0149693	0.0215089	0.0155329	0.0168246
0.0189495	0.0141314	0.0119862	0.0166693	0.0182142	0.0102667	0.017403	0.01872	0.0162795	0.018962	0.0144788	0.0130294	0.012947	0.0150465	0.0200587	0.0180783	0.0215609	0.0140117	0.0183901	0.0130486	0.0133477	0.0102428	0.0164825	0.0125021	0.0107317	0.0116637	0.0135295	0.0157752	0.00999865	0.0164927	0.0186916	0.0150136	0.0178743	0.0185379	0.00896198	0.0114165	0.0185603	0.0145218	0.0190902	0.0238549	0.00925168	0.0200253	0.0189765	0.00953721	0.0144316	0.00928245	0.0153798	0.0220987	0.0122184	0.0176617
0.0330979	0.0274648	0.0184137	0.0244171	0.0218057	0.014267	0.023407	0.0332916	0.0227897	0.0242503	0.0224869	0.0313878	0.02173	0.0235394	0.0308572	0.0293111	0.0474388	0.0155859	0.0278265	0.015407	0.0243203	0.0150999	0.0242906	0.0187596	0.0180916	0.0255837	0.0217283	0.0183407	0.0205145	0.0251404	0.0215286	0.036045	0.0173252	0.191464	0.0124689	0.0141564	0.0257077	0.161635	0.0248353	0.158658	0.0155544	0.0214631	0.0224838	0.0146028	0.0224985	0.0164768	0.0175829	0.0370353	0.0205255	0.0296432
0.0226795	0.0202956	0.0242081	0.0248839	0.0236593	0.0126836	0.0287658	0.0224049	0.0280071	0.018965	0.0199586	0.0183062	0.0154811	0.0159478	0.0211366	0.0226289	0.0405809	0.0167598	0.0248245	0.0207374	0.0175812	0.014896	0.0213484	0.0163106	0.0115001	0.0182928	0.0193105	0.0169047	0.012292	0.0314109	0.0215578	0.0326954	0.01747	0.0367005	0.0123539	0.0108579	0.0280828	0.0177082	0.0240469	0.02174	0.0124887	0.0261256	0.0271465	0.0126818	0.0138247	0.0130417	0.0164635	0.0303427	0.0164661	0.0237585
0.0171083	0.0200488	0.019131	0.0237839	0.0183504	0.011712	0.015448	0.019718	0.023525	0.0186533	0.017441	0.0165649	0.0143892	0.0171594	0.0212295	0.0179327	0.0217222	0.0112094	0.0196727	0.0144018	0.0171078	0.0100124	0.0152463	0.0126982	0.0114015	0.0170026	0.0132121	0.0158288	0.0126426	0.0251006	0.0194301	0.0191703	0.0183427	0.024453	0.0113844	0.0110095	0.0186444	0.0159026	0.0202494	0.0175872	0.0120027	0.0170188	0.0180227	0.0120591	0.01396	0.0105859	0.013602	0.022154	0.0162092	0.0292256
0.0276543	0.0222727	0.0183669	0.282341	0.282563	0.043941	0.225438	0.2609	0.239129	0.245675	0.162899	0.212693	0.0173667	0.0162954	0.0209216	0.0198591	0.0224413	0.0517282	0.0175235	0.0191051	0.0241054	0.0151054	0.0152216	0.0175935	0.0114674	0.018882	0.0155135	0.0179102	0.0143051	0.0235874	0.0168552	0.0241561	0.0146304	0.0276685	0.0131035	0.0145334	0.0173456	0.0151147	0.0293967	0.0190531	0.0126279	0.0206657	0.0217521	0.0147633	0.0962102	0.0126196	0.018597	0.031004	0.0170306	0.020236
0.0139506	0.0174779	0.0103244	0.0480447	0.0461786	0.0681187	0.0523636	0.0540242	0.0504543	0.0413967	0.0267165	0.0345321	0.0111702	0.0142721	0.015245	0.014374	0.0203775	0.10147	0.0151953	0.0117355	0.0108338	0.00928704	0.0108527	0.00976283	0.00940046	0.0129401	0.0104157	0.014031	0.00908558	0.0195242	0.014418	0.0161152	0.012976	0.0154094	0.00847009	0.00726179	0.0153248	0.0108927	0.0185807	0.0189669	0.00951949	0.016775	0.0148138	0.0077184	0.0297294	0.00841628	0.0131989	0.0227619	0.0113009	0.0134452
0.0333629	0.0191668	0.0169998	0.101496	0.107701	0.124452	0.0777015	0.0939939	0.0815017	0.0894035	0.0516245	0.0881183	0.0168131	0.0158017	0.0225051	0.0254632	0.0214871	0.138903	0.0232783	0.0148136	0.016646	0.0145535	0.0178348	0.0141502	0.0143043	0.0178291	0.0181488	0.016947	0.0104785	0.0193582	0.0160451	0.0237899	0.0145948	0.0227479	0.0134962	0.0115447	0.0242988	0.0180097	0.0146805	0.019297	0.0117108	0.0188877	0.0222736	0.0123937	0.0554369	0.0114687	0.0171923	0.0212222	0.0172682	0.0224947
0.0357912	0.021734	0.0200114	0.0246675	0.0244109	0.0145077	0.0261028	0.0252556	0.0248092	0.0269261	0.0194046	0.0242956	0.0255873	0.0177887	0.0198783	0.022749	0.0555695	0.0165532	0.0242996	0.0163632	0.0202586	0.0150552	0.0206385	0.0191106	0.0172268	0.0291476	0.023468	0.021427	0.0178855	0.0246981	0.0218486	0.0287116	0.0235904	0.50952	0.0187863	0.0166344	0.033154	0.129748	0.0269761	0.112728	0.0161894	0.0280055	0.0251361	0.0145786	0.0191159	0.0136436	0.0168957	0.0393338	0.0249785	0.0307986
0.0208323	0.0234227	0.017485	0.0248452	0.0198786	0.0115861	0.0207769	0.0195246	0.0227576	0.0215254	0.0237027	0.0165277	0.0180304	0.0208944	0.0188586	0.0225152	0.0253888	0.0141228	0.0208576	0.0172575	0.0173547	0.0144973	0.0199931	0.125737	0.0135669	0.0189929	0.0166717	0.0150589	0.014948	0.024547	0.0242054	0.0297094	0.0220819	0.0314248	0.0128696	0.0133678	0.271656	0.0175171	0.0275558	0.0294418	0.0173964	0.370685	0.0231086	0.0158136	0.0156436	0.0118986	0.0170936	0.0305803	0.0197374	0.241387
0.0215613	0.0157867	0.0167378	0.0247323	0.0225554	0.0128535	0.0228724	0.0309821	0.0213413	0.0246838	0.0190741	0.0216602	0.0219261	0.015482	0.0189482	0.01836	0.0244274	0.0132204	0.0201414	0.0137407	0.0178624	0.0150561	0.024455	0.0165229	0.01778	0.0208328	0.0146945	0.0201621	0.017453	0.0240543	0.0183099	0.0241101	0.0238749	0.0341236	0.0158205	0.0169234	0.0284102	0.0179829	0.0197637	0.031511	0.0187456	0.0194748	0.0236084	0.0140314	0.0143511	0.0125074	0.0149996	0.0252484	0.0170621	0.0220395
0.0183404	0.0276423	0.01992	0.0205384	0.0226881	0.0148509	0.0290982	0.0390975	0.0223905	0.0203335	0.0191623	0.0162137	0.0174281	0.0177901	0.0206912	0.0212478	0.0240592	0.013542	0.0252933	0.0217715	0.0175932	0.0173007	0.0170022	0.0190374	0.0120082	0.0190265	0.0174267	0.0180194	0.0130152	0.0277244	0.019185	0.0325226	0.0192396	0.0231788	0.0144192	0.0149773	0.0230728	0.0169581	0.0217293	0.0217252	0.015469	0.0265587	0.021829	0.0133515	0.0210518	0.0105271	0.0235033	0.030394	0.0198916	0.0237747
0.0169592	0.0169012	0.0153595	0.0183091	0.0207609	0.0136097	0.0164913	0.0159923	0.0153265	0.0257694	0.0165032	0.0146519	0.0142206	0.0211656	0.0158759	0.0176905	0.0187668	0.0128943	0.0225755	0.0117477	0.0146607	0.0118425	0.0149922	0.0169197	0.0117874	0.0163862	0.0165116	0.0857542	0.0115706	0.0229457	0.0229816	0.0177272	0.0159337	0.0203615	0.012258	0.00945292	0.0301871	0.0201636	0.018799	0.0180578	0.00996252	0.018853	0.0178115	0.0115978	0.012729	0.0144884	0.0187696	0.0297891	0.014242	0.0181609
0.019233	0.0185882	0.0147811	0.0148461	0.0192122	0.01203	0.0198244	0.0186201	0.0171165	0.0186715	0.0167693	0.0156425	0.0193251	0.0190975	0.0161672	0.0183754	0.0173911	0.0132834	0.018182	0.0161791	0.0158504	0.0120156	0.0169381	0.0127253	0.0109661	0.0151638	0.0124764	0.100822	0.0101772	0.0192837	0.0226295	0.0259201	0.0153337	0.0198586	0.0114919	0.010589	0.0160412	0.0138157	0.0234514	0.0201415	0.0101413	0.0246947	0.0170192	0.0102676	0.0107859	0.0103535	0.013915	0.0231225	0.0150333	0.01936
0.0183705	0.0181171	0.0189417	0.0207772	0.0165222	0.0096448	0.0182282	0.0199999	0.0184574	0.015108	0.0145931	0.0182289	0.0150093	0.0160752	0.0154423	0.0182608	0.016081	0.0153742	0.0181064	0.0105127	0.0181224	0.012479	0.0159585	0.0135953	0.0132144	0.0150692	0.0110129	0.0914102	0.0133528	0.0219274	0.0154987	0.022055	0.0213105	0.0193552	0.0131878	0.00994531	0.0209732	0.014051	0.0161757	0.0210086	0.0110471	0.0187201	0.0180622	0.0103712	0.0126149	0.00974309	0.0151272	0.0225364	0.0162507	0.0168619
0.0173999	0.0159249	0.0208239	0.0281773	0.0232368	0.0113702	0.0192271	0.0203145	0.0213408	0.0177467	0.0240127	0.0223741	0.0145901	0.0202283	0.0169533	0.0181502	0.0215467	0.0121625	0.0203177	0.0110888	0.0172353	0.0111378	0.0223472	0.0155982	0.0125036	0.0131439	0.0137945	0.123236	0.0152918	0.0198249	0.0251508	0.0207257	0.0183913	0.0280125	0.0114332	0.0120737	0.0160891	0.0179086	0.0181748	0.017074	0.0116524	0.018134	0.0209961	0.0126668	0.012567	0.0104605	0.0137553	0.0254693	0.0148931	0.0300666
0.0169812	0.0159031	0.0207955	0.0261847	0.020111	0.0111554	0.0203529	0.017946	0.0228072	0.0177225	0.0258245	0.0219945	0.0164302	0.0204977	0.0152703	0.0173856	0.0206016	0.012359	0.0190725	0.0110736	0.0175247	0.0135493	0.0240556	0.0163306	0.0126913	0.0128207	0.0161924	0.119758	0.0156727	0.0222725	0.0263722	0.0194302	0.0195322	0.0265518	0.0114176	0.0118596	0.0188789	0.0209677	0.0177796	0.0159623	0.0128614	0.0185117	0.0236854	0.0122662	0.0135341	0.0102629	0.0129123	0.0254345	0.0151534	0.0245278
0.0153366	0.0161879	0.0153908	0.0171233	0.0219517	0.0111083	0.0191197	0.0174817	0.0204771	0.0187281	0.0150007	0.0166869	0.0219173	0.017453	0.0208254	0.0173122	0.0186911	0.0123068	0.0177797	0.0127048	0.0168274	0.0118811	0.0161618	0.0117585	0.00958017	0.0142864	0.0120329	0.152511	0.0108045	0.0201249	0.0181325	0.0168245	0.0145148	0.0250233	0.0102325	0.00885712	0.0203991	0.020265	0.0191799	0.0195074	0.0103676	0.019235	0.0197189	0.0108785	0.0124968	0.0111321	0.0136785	0.0236386	0.0153689	0.0168443
0.0197157	0.0162319	0.0190804	0.024194	0.0270316	0.0113374	0.020322	0.0218142	0.0265059	0.0180568	0.0245575	0.0261442	0.013929	0.0172039	0.0169045	0.0177286	0.0219417	0.0119147	0.0218799	0.0110568	0.0184355	0.0100961	0.0205465	0.0160551	0.0124677	0.0131061	0.0132722	0.117173	0.0142446	0.019356	0.0219436	0.0194008	0.0238689	0.026985	0.0115903	0.0130258	0.0152406	0.0166256	0.0177526	0.017387	0.0105997	0.0172782	0.0197725	0.0118649	0.0105652	0.0113453	0.0145386	0.0231386	0.0137295	0.0337803
0.0189962	0.0233742	0.017742	0.0258489	0.0290681	0.0143733	0.0196266	0.0238487	0.027352	0.0192101	0.0181773	0.0164435	0.0217465	0.0181598	0.0276117	0.0189054	0.0188103	0.0149478	0.0207398	0.0125447	0.0150531	0.0133755	0.0194598	0.0173726	0.0133337	0.0122362	0.0130784	0.124234	0.0233578	0.0177733	0.015102	0.0215881	0.0216189	0.0199563	0.0104885	0.0134695	0.0156988	0.0160683	0.0155903	0.0189047	0.0108429	0.019761	0.0225685	0.011332	0.0120834	0.0115704	0.0145917	0.0237894	0.0149045	0.0194946
0.0236804	0.0197785	0.0174127	0.019529	0.0181663	0.014334	0.0199567	0.0175452	0.0183094	0.0180732	0.0184349	0.0163986	0.0148711	0.0187039	0.0235551	0.0218112	0.0173863	0.0129903	0.0182498	0.0175627	0.0140738	0.0109137	0.0202756	0.0150653	0.0141156	0.0146434	0.0130427	0.105852	0.023294	0.0181369	0.0229048	0.018152	0.017481	0.0203756	0.0112205	0.0132352	0.0176631	0.0169488	0.0192495	0.0166777	0.0124455	0.0185004	0.0252232	0.0132165	0.013034	0.011722	0.0153755	0.0237245	0.0159856	0.0274714
0.0259855	0.0186737	0.0176508	0.0194818	0.0188935	0.0121147	0.0187599	0.0167249	0.0197562	0.0191113	0.0147123	0.0177512	0.0145261	0.0171779	0.0195267	0.0199146	0.0200829	0.0118967	0.0186103	0.0146402	0.0162237	0.0104841	0.0196487	0.0132755	0.0136733	0.014608	0.0171073	0.112496	0.0114185	0.0164483	0.0178414	0.0185293	0.0168574	0.019381	0.012142	0.0134002	0.0220255	0.0193672	0.024373	0.0177225	0.0140437	0.0192582	0.0201298	0.0122291	0.0117759	0.0102319	0.016434	0.0231036	0.013429	0.0227673
0.0248795	0.0169633	0.0207955	0.0171959	0.0228183	0.0145419	0.0215049	0.0195065	0.0205639	0.0166374	0.0169089	0.0192015	0.0167402	0.0184182	0.0212457	0.0170157	0.0183125	0.0121459	0.0158261	0.0173326	0.0153341	0.0113248	0.0205777	0.0158282	0.015557	0.0149575	0.0145007	0.111032	0.0180839	0.0189729	0.0226048	0.0168959	0.0169085	0.0194397	0.0116079	0.0134408	0.0168705	0.0191176	0.0251877	0.0243062	0.013678	0.0185117	0.0182494	0.0151411	0.0150105	0.0119124	0.0153849	0.0237389	0.0148728	0.0253736
0.0212512	0.0197218	0.0162426	0.0155784	0.0177288	0.0146899	0.0191341	0.0178837	0.0178843	0.0165797	0.0159311	0.0156558	0.0157553	0.0153939	0.0178638	0.0154821	0.0182489	0.0163506	0.0186019	0.0148735	0.0190231	0.0133007	0.017618	0.0152725	0.0136671	0.015514	0.0137278	0.10345	0.0124146	0.0176739	0.023152	0.0151535	0.0156877	0.0198447	0.0111883	0.0120154	0.021215	0.0193585	0.0191943	0.0191606	0.0111892	0.0196505	0.0220554	0.0131786	0.0152037	0.0124189	0.0128675	0.0242197	0.0145415	0.0202284
0.0183477	0.0199126	0.0133341	0.0254977	0.0179686	0.0124057	0.0208784	0.0327803	0.0243933	0.0164464	0.0154991	0.0162201	0.0193059	0.0143892	0.0167357	0.0179173	0.0199124	0.0136915	0.0192546	0.0114224	0.0157767	0.0123941	0.0197684	0.0141563	0.0109267	0.0190103	0.0126619	0.103808	0.0141024	0.0224244	0.0180003	0.0233826	0.021037	0.0206225	0.0120389	0.0109418	0.0170738	0.0164596	0.0274615	0.0179307	0.0127137	0.0214815	0.0203428	0.0104202	0.0126489	0.00960161	0.0133072	0.0234663	0.014702	0.0267544
0.016015	0.0181767	0.0222366	0.0255128	0.021422	0.0126101	0.0254487	0.0216092	0.0184907	0.023611	0.0200696	0.0193376	0.017171	0.0167484	0.0226559	0.0186596	0.0199243	0.0120135	0.0228784	0.0116673	0.0201195	0.0120015	0.0183468	0.0149102	0.0133628	0.0150965	0.0129084	0.0988098	0.0188806	0.0191741	0.0161478	0.0183829	0.017301	0.0192279	0.00959923	0.00977528	0.015892	0.0198242	0.0282106	0.0190178	0.0135289	0.0163197	0.0264997	0.0117534	0.0114395	0.00960731	0.014402	0.0251573	0.0177639	0.0213326
0.0190136	0.0159516	0.013812	0.0219525	0.0256034	0.013787	0.0238816	0.019566	0.0198765	0.0181393	0.0157269	0.0234622	0.0171022	0.0146007	0.0146509	0.0185517	0.0215828	0.0119692	0.0195377	0.0142464	0.0222865	0.00993938	0.0174426	0.0120963	0.0149885	0.0177588	0.0126056	0.098392	0.011085	0.0244089	0.0242482	0.0194895	0.020469	0.030913	0.0108798	0.0176453	0.0189364	0.0126808	0.0159761	0.0203776	0.0112624	0.0177608	0.0218102	0.0101889	0.0130817	0.0125001	0.016534	0.0226774	0.0182958	0.0326621
0.0187242	0.0178033	0.0155449	0.0204603	0.0160451	0.0110192	0.0201042	0.0196536	0.0166195	0.0185778	0.0163986	0.0182772	0.0244973	0.0176064	0.0160675	0.0153463	0.0162799	0.0115765	0.0192404	0.0116517	0.0160741	0.00978812	0.018036	0.0171238	0.0137494	0.0132672	0.0136074	0.134642	0.0113132	0.0207782	0.0161262	0.0171067	0.0181418	0.0299742	0.00939846	0.0121052	0.0206321	0.0179703	0.01866	0.0139756	0.0112927	0.0198756	0.0187935	0.0115484	0.014098	0.0115858	0.0187248	0.0290319	0.0141367	0.0204687
0.017251	0.0164902	0.0189717	0.017848	0.021886	0.0108773	0.0209687	0.0174294	0.0200445	0.0154403	0.0149557	0.0166369	0.0218516	0.0182855	0.02307	0.0165258	0.0227257	0.0122699	0.0169207	0.0150567	0.0146022	0.0114439	0.0158256	0.0112244	0.0107708	0.0151528	0.0110371	0.161315	0.0111711	0.0200646	0.0187016	0.0184515	0.0159184	0.0225947	0.0132246	0.0102042	0.0215343	0.0180614	0.0180192	0.0180083	0.0101339	0.0183783	0.0208163	0.00913336	0.0139252	0.0121904	0.0158195	0.0274958	0.0181088	0.0209923
0.019301	0.0179772	0.0199011	0.0210499	0.0200594	0.0115242	0.0172363	0.018289	0.0197652	0.0180377	0.013799	0.0174111	0.0213353	0.0171857	0.0235088	0.0158651	0.0242017	0.0155153	0.0206425	0.0141666	0.0152947	0.013111	0.014165	0.0107756	0.00959607	0.0140057	0.012535	0.160267	0.0110229	0.0201583	0.0200415	0.0160098	0.0165743	0.0222273	0.0115781	0.0126177	0.0220355	0.0190684	0.0199506	0.0180924	0.0103848	0.0192669	0.0189771	0.0101318	0.0144811	0.0116989	0.0202777	0.0219866	0.0131552	0.0231994
0.0163485	0.0170117	0.011363	0.0244565	0.021968	0.014	0.0173762	0.0176529	0.0215974	0.0222852	0.0189426	0.0208388	0.0146241	0.0137279	0.0175777	0.0188745	0.0167486	0.0147705	0.0179711	0.0185408	0.0192819	0.0103187	0.0159045	0.0152384	0.0118242	0.0182206	0.012797	0.12978	0.00928537	0.01906	0.0193444	0.0207395	0.0159978	0.0255624	0.0113586	0.0119885	0.0208824	0.0157335	0.0196133	0.0202572	0.0108098	0.0201465	0.0175694	0.0110711	0.0182417	0.0123507	0.0158695	0.0223101	0.0140484	0.0203568
0.0178844	0.0197502	0.0143512	0.0233475	0.0201233	0.0120924	0.0181309	0.0165401	0.0169323	0.0191675	0.0186624	0.0174925	0.0164287	0.0166019	0.0166329	0.0149698	0.0180862	0.0104713	0.0156403	0.0118298	0.0171874	0.0105223	0.0167558	0.0128304	0.00927013	0.0150006	0.0111777	0.143516	0.0100676	0.0182813	0.013613	0.02035	0.0185394	0.0219291	0.012285	0.0123796	0.0181907	0.0127757	0.019273	0.0171283	0.0108189	0.0155104	0.0187066	0.0107111	0.0116182	0.0095357	0.0121769	0.0266859	0.0135195	0.0220039
0.0198593	0.0177718	0.0130235	0.0169558	0.0186861	0.00942826	0.0147675	0.0196188	0.018802	0.0213979	0.0148539	0.0151467	0.0137553	0.0137672	0.0202943	0.0186017	0.0234738	0.0117661	0.0272089	0.0130553	0.024377	0.00917257	0.0151463	0.0170935	0.0115048	0.0156516	0.0150131	0.0590426	0.0110951	0.021148	0.0170264	0.0254063	0.0155225	0.0229083	0.0108829	0.0105245	0.0162388	0.0155061	0.0157051	0.0228936	0.0132856	0.0170627	0.0176117	0.0137957	0.0128598	0.0110232	0.0162536	0.0261939	0.0132816	0.0204324
0.0173472	0.0203534	0.011247	0.0225082	0.021519	0.012445	0.0172434	0.0190412	0.0193434	0.0155345	0.0156052	0.0156764	0.0160383	0.016529	0.0210629	0.0191374	0.0187695	0.0126882	0.0186176	0.0171541	0.0195504	0.0110546	0.0158432	0.0154506	0.0139871	0.0131109	0.013683	0.0449394	0.0152989	0.015702	0.0171621	0.0251516	0.0187818	0.0222158	0.010588	0.0113837	0.0207811	0.0135447	0.0278411	0.0187687	0.0149459	0.0200342	0.0204672	0.0102898	0.0136917	0.00912367	0.0155542	0.0314485	0.0158876	0.0189891
0.0236757	0.0177698	0.0141303	0.0256976	0.0265521	0.01175	0.0204231	0.0188621	0.0177153	0.0213338	0.019323	0.0212678	0.0173862	0.0143627	0.0150868	0.0171689	0.0230198	0.0121567	0.0204043	0.0116389	0.0217873	0.0140794	0.0165348	0.0136047	0.00930295	0.0129875	0.0149564	0.0861235	0.0104919	0.0179472	0.0173042	0.0191968	0.0163499	0.0215483	0.00956836	0.0105121	0.0170899	0.0128209	0.0207739	0.0182413	0.0108572	0.0210131	0.0229029	0.0105637	0.0145146	0.0152403	0.0172675	0.0289665	0.0130247	0.0196283
0.0210679	0.0171077	0.0158248	0.0177606	0.0187221	0.0104304	0.0201072	0.021969	0.0195769	0.0164366	0.0145787	0.0165554	0.014088	0.0161416	0.0177097	0.0193684	0.0208052	0.0107362	0.0176396	0.013556	0.0222598	0.0101891	0.018325	0.0124104	0.0105158	0.0135707	0.0119381	0.0906665	0.0103224	0.0187439	0.0139575	0.0187784	0.0178565	0.0248261	0.00977584	0.0150361	0.0222225	0.0188868	0.0179309	0.016128	0.0116977	0.0174931	0.0257011	0.00965665	0.0175035	0.0106822	0.0135707	0.0323866	0.014416	0.0225607
0.0218191	0.0146442	0.0146947	0.0185081	0.0236576	0.0123819	0.0219749	0.016936	0.0247153	0.0221242	0.014256	0.0179112	0.0149869	0.0172925	0.0189962	0.0186127	0.0180674	0.0109322	0.0180165	0.0137755	0.0179076	0.00957703	0.016585	0.0109066	0.0109057	0.0129503	0.0154988	0.0935146	0.0101104	0.0199397	0.0126999	0.0183367	0.0175451	0.0191795	0.0108893	0.013651	0.0237781	0.0237292	0.0164453	0.0175383	0.0110779	0.0186609	0.0229853	0.00983289	0.017723	0.0112105	0.0130105	0.0245364	0.0160581	0.0216962
0.0210648	0.0153597	0.0169328	0.0212324	0.0179552	0.0118062	0.017449	0.0181121	0.0188354	0.0203641	0.0167023	0.0186221	0.0137797	0.0126179	0.021314	0.0182694	0.0171844	0.0115765	0.0184387	0.0159319	0.0173106	0.0109867	0.016032	0.0124086	0.0107165	0.0129656	0.0109814	0.11235	0.0111148	0.0171114	0.020778	0.0196101	0.0184298	0.0252907	0.0101503	0.0119099	0.0170612	0.0143153	0.015733	0.0186341	0.0133092	0.0214656	0.0222454	0.0132523	0.0160425	0.0104996	0.0162824	0.0284736	0.0149683	0.0200509
0.0203753	0.0185842	0.0170085	0.0182251	0.018803	0.00988253	0.0243854	0.0232253	0.0189196	0.0186609	0.0186072	0.0190518	0.0169172	0.0162113	0.0217387	0.016883	0.0177155	0.0141654	0.0173132	0.0133758	0.018009	0.0152495	0.0146659	0.0109684	0.0146233	0.0127207	0.0170253	0.102702	0.0113638	0.0208711	0.0140178	0.0180214	0.0167766	0.0183472	0.0115174	0.0119632	0.0179345	0.0143793	0.019846	0.0151179	0.0109381	0.0191659	0.0242712	0.0108394	0.0217298	0.0103648	0.017173	0.0302834	0.0161489	0.0234974
0.01758	0.0297163	0.0155679	0.0197174	0.0241034	0.0116267	0.0220335	0.0208406	0.0233018	0.0264768	0.0176395	0.017959	0.0147202	0.0155754	0.0203605	0.0190283	0.0190214	0.0120153	0.0204732	0.0157174	0.0173363	0.0104028	0.0163425	0.0131726	0.0123523	0.0157026	0.0121931	0.111029	0.0111313	0.0191769	0.0152184	0.0183856	0.0141312	0.022983	0.00865941	0.0101678	0.0325835	0.0161668	0.022352	0.0197384	0.00989576	0.0258766	0.0272719	0.0104279	0.0185006	0.0126908	0.0141324	0.0229245	0.0169337	0.0213357
0.0215234	0.0145302	0.0139726	0.0198054	0.0170108	0.0106665	0.0172577	0.0179055	0.0178751	0.0207498	0.0155799	0.0176923	0.0165993	0.0147705	0.0149184	0.0254659	0.0210119	0.00977982	0.0174605	0.011509	0.0197488	0.0119886	0.0249411	0.0124919	0.0117436	0.0148857	0.0117854	0.114221	0.0117197	0.0193244	0.0213138	0.0197903	0.0153312	0.0249347	0.0103713	0.0105838	0.016131	0.0129727	0.0219587	0.0197721	0.00917445	0.0227026	0.0170783	0.0109955	0.0127056	0.0113902	0.0197016	0.0226984	0.0169041	0.0169831
0.0158281	0.0162372	0.0142851	0.0248331	0.0219282	0.0167471	0.0172684	0.0198316	0.0186405	0.0169712	0.0153273	0.0174055	0.0166676	0.0159721	0.0162257	0.0188035	0.0179016	0.0139564	0.0245949	0.0112958	0.0140722	0.00929144	0.0150161	0.0110521	0.0126066	0.0232757	0.012994	0.127071	0.00923192	0.0185471	0.0147317	0.0231234	0.0148192	0.023175	0.0111614	0.00966122	0.0176699	0.0171814	0.0199153	0.0180866	0.0125728	0.0192765	0.0182195	0.011991	0.0132304	0.00985351	0.0128911	0.0232062	0.0178309	0.0268713
0.0214042	0.0156717	0.0127389	0.0157904	0.0160072	0.0123673	0.0192999	0.0184538	0.0191594	0.0188903	0.0218133	0.0154818	0.0146637	0.0187358	0.0150482	0.0284329	0.0171438	0.0125991	0.0259931	0.0158943	0.01912	0.0115586	0.0217064	0.0123793	0.00968256	0.0135367	0.0195293	0.117126	0.0116826	0.0207291	0.0157788	0.0241426	0.0203972	0.0242965	0.0136894	0.0177254	0.0233542	0.0179279	0.018616	0.0168026	0.0106625	0.0222081	0.0202797	0.0122766	0.0123672	0.00903005	0.0140781	0.0222795	0.0193575	0.0262547
0.0221417	0.0218783	0.0164126	0.0246511	0.0230394	0.0144264	0.0188394	0.0209622	0.0205262	0.0202786	0.0201099	0.0154962	0.0184674	0.0159618	0.0162858	0.0194434	0.0229946	0.0139383	0.02133	0.0132159	0.0171802	0.0103935	0.0186196	0.0152603	0.0107596	0.0196108	0.0169378	0.0175735	0.0157251	0.023607	0.0282376	0.0212157	0.022815	0.0238146	0.0122252	0.0159307	0.0234594	0.0190891	0.0216331	0.0169501	0.0107307	0.0244433	0.0190489	0.0129845	0.0143716	0.0109175	0.0189333	0.0303695	0.0183558	0.0246985
0.0257649	0.016202	0.0118925	0.0213629	0.0194358	0.0138746	0.0196369	0.0171979	0.0194487	0.0277424	0.0140946	0.0163134	0.0150323	0.0144051	0.0140484	0.0198938	0.0177597	0.0118356	0.0225396	0.0146446	0.0151747	0.00891471	0.015076	0.0112968	0.00992594	0.0148021	0.0129976	0.0137949	0.0088576	0.022182	0.0182687	0.0215995	0.0133652	0.0154669	0.0100663	0.0109788	0.0191235	0.0146802	0.0209005	0.0179113	0.0100793	0.0188044	0.0167742	0.0104765	0.0138849	0.0100178	0.0152596	0.0224243	0.0158341	0.0178965
0.0226881	0.0183696	0.0165293	0.0267295	0.0275095	0.0160768	0.0262644	0.0298845	0.0245489	0.045516	0.0357453	0.0262654	0.0195062	0.0178796	0.0195257	0.0212515	0.0256756	0.0169056	0.0366355	0.0161352	0.0239716	0.0135546	0.0186331	0.0140904	0.0134401	0.0204601	0.0168599	0.0172869	0.0118186	0.0248242	0.0244788	0.0242671	0.02273	0.0226998	0.0143164	0.015141	0.0219779	0.0210891	0.0273603	0.0178646	0.0125663	0.0236703	0.0223073	0.0138948	0.0222156	0.0115316	0.0176625	0.0309256	0.0176572	0.0277665
0.0121575	0.0138661	0.00932978	0.0148623	0.0156415	0.00721475	0.0159945	0.0186041	0.012413	0.0128811	0.00890768	0.0153839	0.00973063	0.0105799	0.012023	0.0156301	0.0143702	0.00990413	0.015432	0.0094453	0.0128452	0.00732426	0.0103219	0.00925106	0.00951426	0.00921308	0.00831542	0.0116244	0.00788379	0.0129464	0.0117498	0.0188679	0.0123182	0.0151689	0.00712176	0.00668155	0.0111534	0.00874803	0.0140861	0.0129201	0.00998168	0.0165184	0.0126566	0.00705718	0.00831814	0.00652691	0.0104476	0.0167178	0.0133818	0.017869
0.0267462	0.02437	0.0176484	0.0221375	0.0219072	0.012265	0.0193879	0.0264223	0.0202578	0.0267225	0.0181715	0.0253643	0.0171782	0.0157298	0.0204389	0.419972	0.0304425	0.0173179	0.0359782	0.0166003	0.0281308	0.0144433	0.0192721	0.0157782	0.015628	0.0191704	0.0163681	0.021861	0.0113817	0.0279341	0.026289	0.0208055	0.021898	0.0262734	0.0189805	0.0204454	0.023742	0.0159473	0.0214376	0.0201026	0.0155861	0.0252729	0.0229504	0.0177006	0.0215141	0.0160229	0.0165767	0.0271439	0.0169321	0.0203092
0.0173702	0.0369179	0.0200861	0.0220248	0.0233904	0.0210835	0.0237529	0.0268123	0.0200429	0.0278401	0.0173257	0.0225541	0.0208793	0.0204165	0.0182518	0.0294899	0.0251711	0.0199167	0.0245424	0.0135665	0.0266691	0.0136205	0.015935	0.121904	0.0115359	0.025175	0.0142844	0.0202661	0.0121523	0.0255118	0.0181247	0.0307716	0.020837	0.0202033	0.012032	0.012226	0.329063	0.017801	0.0239294	0.0244339	0.0171171	0.24062	0.0261518	0.0121183	0.0155589	0.0171296	0.0143497	0.0271915	0.0200574	0.31796
0.0307026	0.0217513	0.0263996	0.0278522	0.0319473	0.0171004	0.0292335	0.029067	0.0327016	0.0316341	0.0253954	0.0231841	0.0276161	0.024058	0.0209695	0.0281593	0.0304022	0.0162213	0.0348352	0.0194955	0.0258502	0.0235834	0.0234715	0.0191259	0.0179036	0.0311485	0.0168321	0.0253429	0.0208287	0.02739	0.021866	0.0362601	0.023137	0.0284145	0.0135616	0.0137664	0.0279756	0.0234732	0.0233979	0.0229161	0.0181862	0.0241169	0.0308162	0.0204883	0.0247111	0.0142481	0.0209139	0.0357033	0.0222713	0.0280833
0.0219321	0.0188257	0.0197475	0.0256913	0.0219172	0.0119663	0.019586	0.0185713	0.0194932	0.018447	0.0170739	0.0245329	0.0196761	0.0185184	0.0203174	0.0230589	0.0207554	0.0147322	0.0229966	0.0139151	0.0234094	0.0194825	0.0164245	0.0148074	0.0116002	0.015223	0.0123263	0.0208034	0.0122978	0.0215039	0.0323812	0.0201073	0.0185033	0.022033	0.0122937	0.0114254	0.0223079	0.0185225	0.0193117	0.0176805	0.0129574	0.0196128	0.0198037	0.014337	0.0122717	0.0114243	0.0186827	0.0237026	0.0197193	0.0210896
0.0206639	0.0193138	0.0205863	0.0272662	0.0206866	0.0120449	0.022773	0.0181455	0.0160859	0.0197663	0.0142992	0.0223273	0.0155001	0.0162351	0.0169841	0.0219362	0.0255523	0.0175919	0.0207617	0.0153955	0.0196497	0.0122277	0.0158393	0.0119777	0.0142812	0.0237814	0.0193904	0.0178439	0.0109812	0.0211022	0.0167929	0.0230844	0.0145762	0.0319767	0.0119486	0.011262	0.0336287	0.0229467	0.0245502	0.0232009	0.0106822	0.021993	0.0207686	0.0122572	0.0140205	0.0119336	0.0156531	0.0262888	0.0199043	0.0250785
0.022238	0.0232173	0.0188388	0.0209594	0.0228155	0.0157578	0.0216245	0.0219688	0.0270696	0.0223066	0.0214339	0.0224678	0.0195349	0.0179232	0.0240342	0.030253	0.0220972	0.0125705	0.0250273	0.0161379	0.01972	0.0138279	0.0182634	0.0235795	0.0197602	0.0188264	0.0149053	0.0205749	0.0150864	0.0326267	0.0185211	0.0237857	0.0207157	0.0197067	0.0117362	0.0132506	0.0210034	0.0202574	0.0168852	0.020915	0.0131382	0.0280567	0.025509	0.0125913	0.017156	0.01204	0.0165754	0.034859	0.0188119	0.0272157
0.0366537	0.0269262	0.0159611	0.0232801	0.0192875	0.0173853	0.0196831	0.0210774	0.0181281	0.0305633	0.0234238	0.0207962	0.0227607	0.0181072	0.0234533	0.0235718	0.0260025	0.017416	0.0292318	0.0156737	0.0221093	0.0145676	0.0204763	0.0156619	0.0153126	0.0211435	0.0127222	0.0254269	0.0153093	0.0228548	0.0160921	0.0351086	0.0185771	0.0269297	0.0171348	0.0205363	0.0244835	0.0213576	0.0261693	0.0316611	0.0141403	0.0284315	0.0317355	0.0172578	0.0194305	0.0114246	0.0175068	0.0297534	0.0155496	0.0234333
0.0203094	0.0258271	0.0182554	0.0216855	0.0240769	0.0161756	0.0291038	0.0227034	0.0217582	0.0269217	0.0191391	0.0165368	0.0159427	0.020504	0.0184199	0.0225277	0.0272617	0.0155726	0.0280086	0.0146607	0.0182113	0.0145054	0.0149051	0.019381	0.0135744	0.0214822	0.0147185	0.02199	0.0125089	0.0217697	0.0182704	0.026296	0.0177542	0.0295172	0.0126192	0.0144452	0.0233754	0.0187787	0.0200517	0.0211117	0.0140906	0.0255975	0.0257489	0.0116722	0.0153192	0.0133934	0.0148723	0.0267726	0.0167102	0.0217484
0.0217624	0.022257	0.0191733	0.023075	0.0213126	0.0135912	0.0226735	0.0230345	0.0260001	0.0232531	0.0165384	0.0196969	0.0244047	0.0198785	0.0239557	0.0223258	0.0240273	0.0142587	0.0314136	0.0167403	0.022583	0.0116748	0.0224361	0.0174712	0.0136975	0.0384496	0.0136352	0.0185556	0.0147637	0.029223	0.0185369	0.0254938	0.0160651	0.024262	0.0124839	0.0147825	0.0274055	0.0182058	0.02187	0.0247516	0.0117857	0.0221765	0.0249634	0.0135794	0.0184034	0.020439	0.0252325	0.0326302	0.0184096	0.0260787
0.0201981	0.016337	0.0163078	0.0253701	0.0319533	0.0105803	0.0234178	0.0230232	0.02611	0.017787	0.0217716	0.0405191	0.0195142	0.0143172	0.015999	0.0156446	0.0202631	0.0104792	0.0251452	0.0139697	0.0147743	0.00914965	0.013398	0.0155681	0.0110734	0.0156125	0.00998372	0.0177573	0.012846	0.0158214	0.0216158	0.0245119	0.0149103	0.0335771	0.00935836	0.012248	0.0193588	0.0166805	0.0185804	0.019625	0.0112445	0.0158326	0.0175676	0.0103681	0.0140378	0.0133389	0.0170236	0.0216811	0.0193206	0.0195495
0.0206519	0.0192512	0.0156144	0.0204377	0.0193824	0.0119366	0.0276129	0.0250772	0.0207745	0.0212785	0.0204315	0.0174964	0.0155361	0.0200662	0.0188067	0.0221652	0.0239413	0.0143934	0.0181264	0.0136381	0.0187518	0.0138803	0.0189456	0.0153284	0.0102586	0.0143005	0.0139551	0.0173746	0.0126969	0.017525	0.0177864	0.0248503	0.0219151	0.0237619	0.0105733	0.011198	0.0188176	0.0167969	0.0209846	0.0189715	0.0108984	0.0219218	0.0241126	0.0102316	0.0158175	0.0119799	0.0137683	0.022784	0.0155921	0.0188901
0.0182084	0.0157326	0.0129571	0.0149127	0.0178321	0.0115601	0.0192323	0.0133358	0.0148612	0.0155262	0.015397	0.0133216	0.0147863	0.0132247	0.0139865	0.0135267	0.0178331	0.0113494	0.0135488	0.0130131	0.0169166	0.0117356	0.0129023	0.013781	0.00911262	0.0138319	0.0134486	0.01196	0.00862553	0.0157383	0.0139765	0.0147746	0.012051	0.0180921	0.00816884	0.00848504	0.0150078	0.0129915	0.0159007	0.0118241	0.0110357	0.0195146	0.0243848	0.0095987	0.0121283	0.00801289	0.0115751	0.0202193	0.0127155	0.0171452
0.0161292	0.0149231	0.00972673	0.0140681	0.0149927	0.00841178	0.0130258	0.0135033	0.0155294	0.0145217	0.0110666	0.0137755	0.0100861	0.0125443	0.0117198	0.0125472	0.0205997	0.00929297	0.0143265	0.00883215	0.0134311	0.00811949	0.0112353	0.0147832	0.00850206	0.01289	0.00987074	0.0118728	0.00848476	0.0185587	0.0106494	0.0137429	0.0106958	0.0210061	0.00843071	0.00834656	0.0191861	0.015582	0.0148719	0.0125566	0.0104578	0.0181076	0.0161273	0.00981796	0.0119241	0.0081194	0.0108403	0.0168244	0.0145693	0.0131736
0.0170429	0.0201979	0.0167166	0.0182337	0.0279681	0.0113851	0.019708	0.0168365	0.0187522	0.0194056	0.0157778	0.0191386	0.0148249	0.0176712	0.0185854	0.0172581	0.0469906	0.0139182	0.0189326	0.0148815	0.0197104	0.0141525	0.0162263	0.0152382	0.0128928	0.0252791	0.0112756	0.018601	0.0131244	0.0206864	0.0205067	0.0418774	0.0159814	0.209597	0.0122075	0.0119884	0.023894	0.191334	0.0185776	0.100707	0.0126201	0.0201835	0.0276262	0.0143071	0.017508	0.0117568	0.0147402	0.0303256	0.0160381	0.0281156
0.0210467	0.0201484	0.01637	0.0232503	0.0215704	0.0182702	0.0280812	0.0232095	0.0189994	0.0179309	0.0182897	0.0250966	0.0184426	0.017673	0.0185147	0.0293417	0.0641181	0.0150537	0.0226327	0.0220789	0.0162901	0.0132841	0.0186791	0.016815	0.0144611	0.0223218	0.0164746	0.023122	0.0112067	0.0209591	0.0194559	0.0314113	0.0177047	0.208028	0.0150945	0.0149438	0.0214072	0.208664	0.0261679	0.100717	0.0113861	0.0214472	0.0245434	0.0140151	0.0182992	0.01431	0.0156631	0.0364274	0.01739	0.0241103
0.0285914	0.0238416	0.0277441	0.0327964	0.025455	0.0134389	0.0271707	0.0276033	0.0227628	0.0285662	0.0182111	0.0281482	0.0204037	0.0298173	0.0223953	0.0328676	0.0527313	0.0245434	0.0220346	0.0198054	0.020597	0.0166377	0.0166912	0.0227371	0.0151568	0.0200912	0.0182927	0.0198044	0.0165311	0.0332547	0.0242799	0.024326	0.0220657	0.163055	0.0156559	0.0156114	0.0297422	0.143585	0.0243794	0.114014	0.0141084	0.0337707	0.0325839	0.0195526	0.0170059	0.0156809	0.0167259	0.044641	0.0240106	0.0327048
0.0180751	0.0201204	0.0141171	0.0218143	0.0189968	0.0135652	0.021006	0.0178563	0.0171129	0.0177655	0.0154441	0.0140305	0.0159192	0.0198978	0.0185292	0.0189953	0.0511075	0.0128453	0.0181204	0.0185429	0.01607	0.0139968	0.0152066	0.0145845	0.0143963	0.0235131	0.0148388	0.0171312	0.0098696	0.018878	0.018926	0.0202762	0.0172485	0.194253	0.0121087	0.0119154	0.017488	0.200337	0.0169535	0.0907168	0.0125345	0.0220131	0.020806	0.014977	0.0145593	0.0102294	0.0156413	0.0283936	0.0147235	0.0226605
0.0255179	0.0200312	0.0203885	0.0163924	0.0214831	0.0133235	0.0200252	0.0207863	0.0207686	0.0164005	0.0156832	0.0249334	0.0172199	0.0195323	0.0195687	0.0272567	0.0539747	0.0144935	0.0271413	0.0174654	0.0180926	0.0144428	0.0164277	0.0150951	0.0109064	0.0380649	0.0109589	0.0208074	0.0116169	0.0201054	0.0217103	0.0268149	0.0287518	0.171998	0.0114332	0.0150128	0.0214015	0.160793	0.0197354	0.10487	0.0108771	0.0177918	0.0215683	0.0117325	0.0142267	0.0126731	0.0183749	0.0262702	0.0174964	0.0234907
0.0216113	0.0173251	0.0179417	0.0222783	0.0171963	0.0124911	0.021015	0.02046	0.0196083	0.0243287	0.0196281	0.0222895	0.020499	0.0247239	0.0246004	0.0172908	0.0464533	0.0140903	0.0231323	0.0137227	0.0185525	0.0117584	0.0142084	0.013749	0.0114353	0.019837	0.0135012	0.0144082	0.0119122	0.0192796	0.0229079	0.0216706	0.0182801	0.158384	0.0130171	0.0155491	0.0187759	0.227097	0.0194257	0.100505	0.0104737	0.0238578	0.0230193	0.0148586	0.0123441	0.014208	0.0169137	0.029642	0.0175962	0.0202497
0.0191455	0.017133	0.0149214	0.023007	0.0183034	0.015406	0.0221633	0.0211652	0.0245999	0.0242143	0.018808	0.0217612	0.017176	0.0171452	0.0245237	0.021776	0.047032	0.013036	0.0234205	0.0166724	0.0184224	0.015173	0.0163927	0.0150803	0.0137043	0.0190271	0.0131115	0.0218815	0.0132203	0.0242807	0.015583	0.0234033	0.0171618	0.160905	0.012081	0.0120923	0.0199371	0.220672	0.0188126	0.088357	0.0108398	0.0181162	0.0215133	0.0154861	0.0147702	0.0126926	0.0177586	0.0247919	0.0207306	0.020502
0.0169687	0.0142554	0.0110892	0.0222761	0.0264532	0.0296961	0.018521	0.022237	0.0154096	0.0190297	0.0169842	0.0168379	0.0171261	0.0190165	0.0189215	0.0145968	0.028905	0.0125193	0.0177923	0.03462	0.0115256	0.0122361	0.0165198	0.0143204	0.00915452	0.014187	0.0141992	0.0163593	0.0163865	0.0166374	0.0200975	0.0218537	0.0161054	0.11808	0.0175213	0.0128263	0.021134	0.16548	0.0136421	0.0703052	0.0102041	0.0197619	0.0177054	0.02	0.0125155	0.0118924	0.0122865	0.0262687	0.0169792	0.0222503
0.0209514	0.0195469	0.0218877	0.0180872	0.0192087	0.0170893	0.0195063	0.0198169	0.0185699	0.0257207	0.0187396	0.0177337	0.0178464	0.0201197	0.0202347	0.0171194	0.052711	0.012748	0.022903	0.0179345	0.017309	0.0116419	0.0199564	0.0232551	0.0134015	0.0265319	0.0147314	0.0193601	0.0117942	0.0190885	0.0177195	0.0238399	0.0187571	0.154139	0.0165397	0.013387	0.0244842	0.186212	0.0188151	0.0925475	0.0131352	0.0172617	0.0205997	0.0131969	0.0172215	0.0122053	0.0151955	0.0261582	0.0190056	0.0219585
0.0163333	0.0264677	0.0135076	0.0209695	0.0233452	0.018482	0.0231801	0.0222409	0.0175535	0.0198106	0.0182138	0.0218541	0.0180195	0.0199242	0.0211513	0.018607	0.0301934	0.012386	0.0199588	0.014262	0.0220381	0.0149196	0.0191145	0.0162889	0.0151018	0.0167198	0.0137778	0.0188357	0.0119042	0.0207472	0.0175473	0.025969	0.0153161	0.0265001	0.013401	0.0156873	0.0193072	0.0158552	0.0219446	0.0190596	0.0143767	0.0188934	0.0225697	0.012426	0.0140284	0.0127013	0.015662	0.0233768	0.0166251	0.0184361
0.0221688	0.0173136	0.0200777	0.0187478	0.0205264	0.0136223	0.0207732	0.0159275	0.0217518	0.019196	0.0156892	0.0163911	0.0142383	0.0169794	0.0172798	0.0173671	0.0205598	0.0132667	0.0240224	0.0186734	0.016609	0.0103202	0.0174529	0.0151293	0.013998	0.0149549	0.0111001	0.0153557	0.014971	0.0235744	0.0140993	0.0224182	0.01577	0.0198412	0.0124303	0.0121045	0.0196787	0.0141622	0.0147442	0.0181433	0.015419	0.0213584	0.0253635	0.0121283	0.0143159	0.0125325	0.015983	0.0242291	0.0174713	0.0194233
0.0189755	0.0207544	0.0186041	0.0183614	0.0169314	0.0131877	0.0176318	0.0191622	0.0231552	0.0200822	0.0151004	0.0201301	0.0152266	0.0158601	0.0159508	0.0177739	0.0224866	0.0134241	0.0194985	0.0141375	0.0160392	0.0153313	0.0185681	0.0155595	0.0109285	0.0153193	0.0141932	0.0134942	0.0135167	0.0321497	0.0170969	0.0252573	0.0140078	0.022276	0.0119882	0.0103417	0.0180138	0.0197547	0.0189845	0.0193683	0.0128611	0.0210553	0.0223884	0.0124836	0.0181299	0.0121326	0.0155475	0.0253477	0.0152815	0.0189653
0.0118814	0.010854	0.00880707	0.0592807	0.0596336	0.0958923	0.0519909	0.0606437	0.0590564	0.0530479	0.0344929	0.047485	0.010104	0.0104272	0.0137328	0.012752	0.0152086	0.0829412	0.0129719	0.00965685	0.0096113	0.00811233	0.00980972	0.0141728	0.00885292	0.0118626	0.0115127	0.0107503	0.0081863	0.0118921	0.012791	0.0156206	0.01005	0.0157509	0.00787214	0.00755739	0.0166168	0.0110164	0.0120728	0.0118242	0.0090851	0.0171522	0.0126555	0.00732797	0.0282255	0.00953425	0.0105041	0.0187763	0.0116087	0.0137835
0.0182286	0.0119945	0.00915636	0.0132644	0.0128639	0.00878934	0.0135549	0.0135059	0.0129437	0.0115391	0.0108518	0.0123231	0.0132572	0.0112925	0.0114922	0.0148145	0.0127414	0.00781074	0.0132219	0.00996793	0.0104088	0.279625	0.0131813	0.0107442	0.553436	0.0165767	0.0101712	0.0128678	0.264467	0.0142787	0.0110819	0.0169167	0.0128628	0.0151268	0.281208	0.300009	0.0149963	0.0115119	0.0118174	0.0150216	0.479615	0.0169365	0.0147599	0.267093	0.0108574	0.173292	0.00951086	0.0153467	0.0127625	0.0192332
0.0142006	0.012708	0.0110959	0.0749512	0.0744441	0.0917166	0.054423	0.0712436	0.0611599	0.0614585	0.0450871	0.0544003	0.0104917	0.011939	0.0138095	0.012519	0.0142029	0.101563	0.016881	0.010184	0.0132388	0.0092681	0.012261	0.0182458	0.00851533	0.0159269	0.00817929	0.0112443	0.00864204	0.0136681	0.0148313	0.0163802	0.0117163	0.0157123	0.00845282	0.00878	0.0141607	0.0115227	0.0172369	0.0135567	0.00777279	0.016457	0.0164262	0.00662159	0.0428549	0.0074946	0.00987897	0.0179333	0.0136522	0.0193812
0.0221984	0.0227721	0.0154111	0.0230398	0.027042	0.0155672	0.0210594	0.0240691	0.0225544	0.0218181	0.0181241	0.0191456	0.0174256	0.0191422	0.0168395	0.0207928	0.0238511	0.0143149	0.0250357	0.0201325	0.0175907	0.015249	0.0186755	0.120558	0.0137514	0.0163217	0.017561	0.0235143	0.0118455	0.0282736	0.0210912	0.0214269	0.0195844	0.0292519	0.0174798	0.0124656	0.245061	0.019869	0.0258992	0.0218843	0.0123151	0.470071	0.0212935	0.0152403	0.0205794	0.0130654	0.0165728	0.0340957	0.0234684	0.24467
0.0207062	0.0228058	0.019646	0.0204914	0.0218381	0.0131229	0.0201349	0.0277984	0.0231225	0.0184776	0.019426	0.0262842	0.0200052	0.0199692	0.0196371	0.0233735	0.0289281	0.018048	0.0196402	0.0155348	0.0193532	0.0149533	0.0198721	0.0776877	0.0143104	0.0221611	0.0126718	0.018204	0.0162082	0.0232894	0.0215264	0.0198757	0.0188128	0.0280474	0.0161176	0.0178044	0.181988	0.0186547	0.0199193	0.0224355	0.0137231	0.242923	0.0381073	0.0121105	0.0162105	0.0189718	0.0169902	0.0303952	0.0215043	0.235378
0.0173371	0.018273	0.0139821	0.0217326	0.0211292	0.0110774	0.0183573	0.0194108	0.0178732	0.0187012	0.0284931	0.0231604	0.0163314	0.0144907	0.0226701	0.0212916	0.0192053	0.0116414	0.0209821	0.0138563	0.0167915	0.0118374	0.0149857	0.0122553	0.0121817	0.0178681	0.0146182	0.134447	0.0119576	0.0213263	0.0186836	0.0214283	0.015358	0.0212778	0.0137379	0.0119557	0.018026	0.0201549	0.02385	0.0233588	0.0137423	0.0180597	0.0181826	0.0110318	0.0156043	0.014661	0.0160813	0.0292247	0.012867	0.0206284
0.0165207	0.0147842	0.0103846	0.0792945	0.0787392	0.0862515	0.0706855	0.0707229	0.0698641	0.0766618	0.0475863	0.0572028	0.0118879	0.0140845	0.0171277	0.0110901	0.0175561	0.118707	0.0152785	0.0159453	0.011346	0.010011	0.0129329	0.0117366	0.00842058	0.014047	0.00994184	0.0104898	0.00826569	0.01898	0.0120395	0.0144309	0.0142283	0.0155375	0.00928751	0.00868231	0.0184841	0.0141893	0.0167869	0.0159353	0.00797098	0.0145904	0.0173264	0.0100223	0.0379172	0.00856123	0.0103437	0.0216746	0.0127176	0.0171016
0.0150133	0.0194064	0.0110792	0.0690604	0.0653469	0.092981	0.0610999	0.0628966	0.062384	0.0677317	0.0445863	0.0557931	0.0137496	0.0135941	0.0149573	0.013021	0.0161154	0.104111	0.0168556	0.0118635	0.0103548	0.00839992	0.0102021	0.0136196	0.00749374	0.0189116	0.010549	0.0137694	0.00834611	0.0136476	0.0125987	0.0151661	0.0116986	0.0173577	0.00763627	0.00821017	0.0164017	0.0134591	0.0146033	0.0155795	0.00862344	0.0147324	0.0155814	0.00796093	0.0485073	0.00916062	0.0110246	0.0163146	0.0110633	0.019352
0.0141942	0.0129513	0.011487	0.0688578	0.068414	0.0885865	0.0603524	0.0632379	0.0587607	0.0680581	0.0426833	0.0563441	0.0102684	0.0113055	0.0166107	0.0182486	0.0141965	0.107975	0.0174453	0.0135725	0.0152178	0.0085513	0.0110299	0.016644	0.00807869	0.0146289	0.0132853	0.010391	0.00849652	0.014534	0.0119482	0.0172659	0.00945094	0.0163735	0.0104607	0.00933324	0.0181175	0.0139079	0.0154018	0.0145733	0.0082009	0.0141807	0.0123141	0.00715889	0.0480382	0.0108493	0.0118107	0.0163318	0.0118661	0.0149019
0.0164841	0.0118495	0.0109609	0.0719382	0.068014	0.0830137	0.0562338	0.0630022	0.0624261	0.0670705	0.0420742	0.0551847	0.0103943	0.0115868	0.0136294	0.0139216	0.0156636	0.0946308	0.0149947	0.0118603	0.0124201	0.0103785	0.0124943	0.0140974	0.00812409	0.0148305	0.0120724	0.0119421	0.00783716	0.0138294	0.0143938	0.0167642	0.0123681	0.0152489	0.00937542	0.0100088	0.0131933	0.0145587	0.0141939	0.016384	0.00866109	0.0123918	0.0127534	0.00957385	0.0461372	0.00990707	0.0135354	0.0201117	0.0128655	0.0138901
0.0162586	0.01307	0.010393	0.0706322	0.0688178	0.0845146	0.0560048	0.0683303	0.0600067	0.0653669	0.043549	0.0560312	0.0112486	0.0107793	0.0138986	0.0139385	0.0194871	0.103043	0.0158572	0.00856704	0.0115736	0.00846685	0.00970754	0.0106942	0.0117127	0.0151235	0.00961263	0.0107083	0.00729093	0.0149661	0.0118302	0.0188638	0.0130193	0.0178661	0.00743604	0.0078618	0.0204612	0.0111886	0.0136989	0.0159482	0.0103992	0.0143215	0.0154438	0.00775688	0.048594	0.00805665	0.0126526	0.0149873	0.0123363	0.0147547
0.0173547	0.0251939	0.0156428	0.0194647	0.0151076	0.0138121	0.0165008	0.0148586	0.0167959	0.016954	0.0222171	0.0153422	0.0133206	0.0168263	0.0145884	0.0231193	0.0245898	0.0172717	0.0194182	0.0178669	0.0146692	0.0124419	0.0127366	0.0139852	0.00979519	0.0268293	0.014397	0.0138109	0.00863389	0.0217507	0.0159432	0.0169125	0.0165124	0.0212994	0.0109643	0.0127399	0.0282432	0.0159595	0.0206186	0.0198397	0.0147531	0.0188639	0.0174426	0.00973278	0.0134573	0.0109174	0.0139512	0.0220787	0.0167167	0.0177584
0.0161852	0.0122364	0.0101274	0.077325	0.0784335	0.0861467	0.0713664	0.0691946	0.0697485	0.0700273	0.0484446	0.0611805	0.0102956	0.0140643	0.0161856	0.0125465	0.0161751	0.106002	0.019212	0.00901562	0.0112777	0.00857395	0.0133119	0.013315	0.00896795	0.0150991	0.00973422	0.0136078	0.0132045	0.0134067	0.011758	0.0158192	0.0103	0.017757	0.00887477	0.00824059	0.0167463	0.0143805	0.0123017	0.0151246	0.00966519	0.0164932	0.0134442	0.00853216	0.0469482	0.00751105	0.0110654	0.0219665	0.0111043	0.0188261
0.0155834	0.0139454	0.0108912	0.0688475	0.0681312	0.0853447	0.0606139	0.0621288	0.061123	0.0629506	0.0409438	0.0580576	0.00982999	0.0133971	0.0147369	0.0172032	0.0180655	0.102854	0.0154411	0.00966897	0.0121283	0.00883501	0.0114367	0.0118615	0.00908716	0.0124757	0.00936645	0.0120856	0.00835365	0.012788	0.0123888	0.0169656	0.01212	0.0197121	0.00925226	0.00891399	0.0161335	0.0110812	0.0130504	0.0166162	0.00848738	0.0141786	0.0125859	0.0089135	0.0488979	0.00891062	0.010841	0.0199138	0.0140394	0.0140057
0.0137907	0.0130816	0.0113836	0.070149	0.0729306	0.081807	0.0665145	0.0670286	0.0691996	0.0646671	0.0455201	0.0577878	0.0114751	0.014316	0.016925	0.0139508	0.0172662	0.107896	0.0167216	0.0121054	0.0122395	0.00833313	0.0113355	0.0135113	0.00972158	0.0127917	0.0119843	0.0130295	0.00898142	0.013251	0.0111829	0.0159305	0.0105876	0.0155639	0.00863879	0.00786878	0.0165518	0.013352	0.0116415	0.0131753	0.00841229	0.0132099	0.0116609	0.00843306	0.0469185	0.0106237	0.0126638	0.0169744	0.0113674	0.012405
0.0132903	0.01338	0.0116247	0.0690505	0.0713149	0.0863137	0.065695	0.0653733	0.0626518	0.0636495	0.0448341	0.0599697	0.0108675	0.0108306	0.0153613	0.0127081	0.0154072	0.0993502	0.0139412	0.0138401	0.010751	0.0107758	0.00995698	0.0167343	0.00832404	0.0171217	0.00847229	0.0135019	0.00845268	0.0150373	0.0132072	0.0192498	0.0114461	0.0149593	0.00800514	0.00817641	0.0177424	0.0151332	0.0158417	0.0132263	0.00815859	0.0146718	0.0133395	0.00765945	0.0477903	0.00758105	0.0107866	0.0158513	0.0135756	0.013639
0.0163645	0.01318	0.0112568	0.053173	0.0609001	0.0605344	0.0556955	0.0487685	0.0508698	0.0407162	0.0360955	0.0347206	0.010705	0.0143617	0.0190292	0.0148174	0.0208681	0.072994	0.012892	0.0172908	0.0123194	0.0101957	0.0102085	0.0142284	0.00805823	0.0107519	0.00884637	0.0120531	0.00971403	0.0142428	0.0147444	0.0140027	0.00946296	0.0176828	0.0106454	0.00805418	0.0199739	0.0121386	0.0143258	0.0132791	0.00930556	0.0144525	0.017967	0.00794205	0.03314	0.00898657	0.013092	0.016395	0.0139541	0.0178161
0.011046	0.0110954	0.00850202	0.0120469	0.0136878	0.00875585	0.0133718	0.0118031	0.0160071	0.0109424	0.0115826	0.0105623	0.0100867	0.0108529	0.0108013	0.012247	0.0164641	0.00705491	0.0118138	0.00989402	0.0116114	0.00784981	0.011581	0.00946549	0.00642665	0.0101065	0.0117264	0.0106493	0.00665254	0.0134202	0.0100361	0.0130204	0.0121481	0.0162392	0.00727794	0.00676984	0.0132989	0.00862474	0.0137437	0.012011	0.00769131	0.0114859	0.0139637	0.00733016	0.00983273	0.00732304	0.0117619	0.0196811	0.0104121	0.0111045
0.0165933	0.0111368	0.0111132	0.050471	0.0513798	0.0913323	0.044847	0.0508645	0.0529054	0.0429093	0.0334339	0.042713	0.00938609	0.00936157	0.0121022	0.0132569	0.0161245	0.0818968	0.0122865	0.0217173	0.0104419	0.00962175	0.0111033	0.00962507	0.00885388	0.0139578	0.0103041	0.010226	0.00807023	0.0145269	0.0114457	0.0169651	0.0126095	0.0140627	0.00823085	0.00867158	0.0188631	0.0133371	0.0171658	0.015019	0.00807327	0.016163	0.0115163	0.00710564	0.0272171	0.00724747	0.00916687	0.0146684	0.0135249	0.013588
0.0321997	0.0223464	0.0233809	0.0338167	0.0302471	0.0172368	0.0287552	0.0259671	0.0261304	0.0306939	0.0235323	0.0273039	0.020118	0.0276821	0.0220955	0.0240055	0.0304721	0.0152467	0.0310614	0.0184265	0.0213501	0.0158159	0.0202554	0.0229936	0.0180527	0.0213337	0.0189012	0.0210293	0.0147115	0.0329435	0.0292556	0.0365492	0.019404	0.0291918	0.0145659	0.0154586	0.0300777	0.022576	0.0277362	0.0392383	0.0159661	0.0254463	0.023906	0.0165839	0.0180166	0.0131131	0.0178289	0.0282154	0.0210128	0.0281479
0.0140746	0.0111009	0.010355	0.0585476	0.0549013	0.0879629	0.0501057	0.0546741	0.050817	0.0410743	0.0369563	0.0447087	0.0132956	0.0125614	0.0100264	0.0102786	0.0157633	0.0810921	0.0117662	0.00828876	0.010397	0.00842896	0.00945401	0.0112307	0.00989206	0.0105105	0.00875937	0.0127234	0.00886047	0.0137032	0.011379	0.0135232	0.00950944	0.0237721	0.00747174	0.00943254	0.0184406	0.0098719	0.013425	0.0102997	0.00813907	0.0138563	0.0121966	0.00752535	0.0277966	0.00719584	0.00995727	0.0143398	0.0118658	0.0143055
0.0245028	0.0269523	0.01562	0.022228	0.0214968	0.0131324	0.0218412	0.0231975	0.0231984	0.0233761	0.0178829	0.0230153	0.0180324	0.024576	0.0223135	0.0196042	0.0230795	0.0206581	0.0241291	0.0267611	0.0202258	0.0143773	0.0191066	0.0178619	0.0121715	0.0232804	0.0199936	0.0171138	0.0114282	0.0223923	0.0182622	0.0327601	0.0211028	0.0275799	0.0142668	0.014308	0.0269995	0.0155446	0.0272916	0.0332947	0.0124028	0.0239287	0.0451718	0.0133782	0.0235382	0.0130293	0.0209523	0.0277631	0.019225	0.0311588
0.0188444	0.0259441	0.0175358	0.0262999	0.0236602	0.0126742	0.0220834	0.0243443	0.021501	0.0287647	0.0173032	0.0234938	0.0231374	0.014539	0.0211208	0.0217245	0.0218459	0.0172074	0.0238324	0.013549	0.0202934	0.0128665	0.0177307	0.0147553	0.0122723	0.0149397	0.0136023	0.0161991	0.0152426	0.0242233	0.0257371	0.0191223	0.0189047	0.0255256	0.0149012	0.0157199	0.0201502	0.0162228	0.0199411	0.0190866	0.018484	0.0265888	0.0213787	0.0161807	0.0180649	0.0116602	0.0208408	0.0269707	0.0175107	0.0253539
0.022674	0.0129123	0.0141791	0.0156392	0.0154765	0.00918455	0.0167033	0.017648	0.0146365	0.0185637	0.0144421	0.0173114	0.012675	0.0134383	0.0176159	0.0176986	0.0227011	0.0100099	0.0194158	0.0146593	0.0193287	0.0102036	0.0123543	0.104472	0.0110405	0.0193852	0.0121941	0.0143968	0.00908943	0.016505	0.0163871	0.0165355	0.0109051	0.0214483	0.0102636	0.00962918	0.155497	0.0155579	0.0151447	0.0164108	0.00905734	0.136182	0.016889	0.00816976	0.0143425	0.0130732	0.0119497	0.019176	0.0122059	0.0967544
0.0185637	0.0141382	0.0129289	0.0175894	0.0170196	0.0107587	0.0180515	0.02068	0.0183233	0.0184486	0.0178339	0.0202519	0.0155025	0.0178268	0.0136126	0.0184981	0.0228941	0.0151314	0.0194812	0.0122791	0.0131455	0.0167875	0.0142037	0.127398	0.0110554	0.0174022	0.0106355	0.0168529	0.011053	0.0206258	0.0169561	0.0274599	0.0154532	0.024659	0.0102774	0.0108729	0.161499	0.0191205	0.0181527	0.0159647	0.01368	0.164618	0.0190288	0.0111179	0.0130439	0.0120975	0.0137386	0.0226119	0.0131911	0.131963
0.0164738	0.0154613	0.0142961	0.0167006	0.0165268	0.0141875	0.0183636	0.0186559	0.0254875	0.0187676	0.015327	0.0159843	0.0145089	0.0148102	0.0138479	0.015807	0.0204951	0.0121409	0.0169279	0.0127363	0.0140095	0.0133741	0.0159236	0.132413	0.0154118	0.0180136	0.0181961	0.0156135	0.0114485	0.0167859	0.014055	0.0266453	0.0145339	0.0221908	0.0112295	0.00985424	0.199846	0.0131765	0.0244964	0.0162407	0.0112163	0.202676	0.0201479	0.0138451	0.0132694	0.0110013	0.0234798	0.0235778	0.0157032	0.153606
0.0179654	0.018174	0.0141737	0.0204846	0.0160641	0.0106382	0.0170899	0.0192911	0.0151601	0.0168114	0.0200666	0.0207158	0.0125698	0.0176273	0.0137885	0.0230467	0.0239961	0.0124332	0.0184606	0.0121417	0.0145458	0.0109997	0.0117517	0.120258	0.00971698	0.0150942	0.0143406	0.0136885	0.0109292	0.0228423	0.013972	0.023393	0.0161452	0.023914	0.010727	0.0117286	0.163664	0.0143323	0.0201474	0.0165036	0.013325	0.182276	0.0149759	0.00928759	0.013628	0.0103309	0.0152149	0.0245946	0.0127659	0.132159
0.0199537	0.0192568	0.0161479	0.0193596	0.0214571	0.0098678	0.0178813	0.018939	0.0207435	0.0161247	0.0158383	0.017294	0.0184276	0.0158929	0.0144709	0.020889	0.0190498	0.0137221	0.0180915	0.0152638	0.0145717	0.0102179	0.0137826	0.016677	0.00973434	0.0133066	0.0141267	0.016694	0.00995341	0.0232917	0.0202178	0.0221793	0.0158852	0.0239567	0.0126314	0.00959546	0.0202955	0.0140524	0.0194495	0.0172519	0.010315	0.0211308	0.016926	0.0100637	0.0121896	0.010894	0.0125203	0.0268784	0.0136227	0.0217865
0.0168473	0.0159995	0.0129672	0.0190544	0.0161624	0.00988567	0.0187228	0.0176622	0.0172525	0.0157446	0.0136507	0.0158055	0.0121454	0.0131904	0.0130058	0.0161025	0.0219222	0.0105745	0.0190782	0.0100602	0.0168922	0.0126767	0.0116072	0.0966819	0.0106929	0.0162116	0.0128351	0.0104788	0.00909675	0.0183138	0.0166736	0.0169165	0.0142134	0.0202271	0.00944348	0.0104974	0.15737	0.0136913	0.0141894	0.0167398	0.00995332	0.201109	0.0148743	0.00967811	0.0130686	0.00877566	0.0119594	0.0196835	0.0109942	0.116714
0.018926	0.0145171	0.0103413	0.016054	0.01688	0.0184116	0.0207043	0.0173613	0.0143987	0.017643	0.0192063	0.0188227	0.013265	0.0139826	0.0147728	0.0177276	0.0203733	0.0120356	0.0215313	0.0164813	0.0160688	0.0119415	0.0124016	0.0911645	0.00893414	0.0182865	0.0132369	0.0146779	0.00808198	0.0190607	0.0123593	0.0177127	0.0147197	0.025969	0.00911973	0.0103185	0.167064	0.0187357	0.0174346	0.0164546	0.0111814	0.141891	0.0146209	0.00770899	0.0147413	0.0092535	0.0122258	0.0203156	0.0144091	0.116535
0.0161954	0.0210494	0.0142686	0.0198435	0.0203923	0.0120595	0.0187482	0.0179039	0.0197141	0.0162453	0.0171107	0.0180671	0.020886	0.0145033	0.0168552	0.017337	0.02101	0.0149805	0.0206041	0.0157488	0.0152782	0.00987306	0.0155647	0.0142285	0.00999364	0.0128166	0.0115631	0.0158655	0.0153033	0.0229557	0.0128753	0.024334	0.0162253	0.0217593	0.00984784	0.00945703	0.0207871	0.0147529	0.0155521	0.0177114	0.00936884	0.02004	0.0155444	0.0101057	0.0129748	0.00966315	0.013681	0.0303539	0.0128782	0.027666
0.0178233	0.0189173	0.0153377	0.0192793	0.017455	0.0129631	0.020556	0.017198	0.0180518	0.0201198	0.0141979	0.0190544	0.0165942	0.0174608	0.0160276	0.0190242	0.0225842	0.0127482	0.0178887	0.0144021	0.0151091	0.0129476	0.0142974	0.0155583	0.0120315	0.0182624	0.0169954	0.015791	0.0118102	0.0229441	0.0187829	0.0336941	0.016829	0.0209013	0.010386	0.010788	0.0320414	0.018771	0.0171061	0.0194192	0.011785	0.025343	0.0224147	0.013478	0.0191125	0.011349	0.0204731	0.0314417	0.0141376	0.0266319
0.0158497	0.0197981	0.0155082	0.0189531	0.0161689	0.0103269	0.0125226	0.0228343	0.014068	0.0169354	0.0123388	0.013136	0.0132195	0.014655	0.0166541	0.0182483	0.0202882	0.0110465	0.0220547	0.0100642	0.0154381	0.0145418	0.0133285	0.0128144	0.00890011	0.0145485	0.0119225	0.0145924	0.00789636	0.0179332	0.0168007	0.0204846	0.0121878	0.0178401	0.00891028	0.00842882	0.0174647	0.0172741	0.0167245	0.0166834	0.00972973	0.0158148	0.0217523	0.0112178	0.0117279	0.0101136	0.0142422	0.0193764	0.0117318	0.0169727
0.0178843	0.0128035	0.0109643	0.0702506	0.0687113	0.0938214	0.0473565	0.0676809	0.0536619	0.0438464	0.0398402	0.0374585	0.0107992	0.0105556	0.0168838	0.0157209	0.0172242	0.0939755	0.01555	0.0159335	0.0130819	0.00845374	0.0123176	0.0101525	0.00912746	0.0163761	0.0102713	0.0153038	0.00979952	0.012644	0.0124681	0.0197175	0.0119836	0.015526	0.00941325	0.00922676	0.0162317	0.013964	0.0131615	0.0141543	0.0135122	0.0140189	0.0137968	0.00787841	0.0440612	0.00740575	0.0166526	0.0192958	0.0115352	0.0132587
0.0180998	0.0155081	0.0153462	0.0186744	0.0241372	0.0108783	0.0157281	0.0209242	0.0156779	0.017635	0.0170885	0.019065	0.0190451	0.0139051	0.0197468	0.019118	0.0196434	0.0112208	0.018203	0.0178411	0.016479	0.00986023	0.0132835	0.01715	0.0115776	0.013693	0.0139048	0.0199529	0.013324	0.0185016	0.0143894	0.0193595	0.0159199	0.0221933	0.0109484	0.0102157	0.0199767	0.0174399	0.019144	0.0159196	0.00975482	0.0215837	0.0196893	0.0123353	0.0141578	0.011259	0.0163422	0.0336214	0.0125878	0.0239186
0.0226151	0.0177954	0.0180352	0.0219947	0.018711	0.011801	0.0197162	0.0169485	0.0214111	0.0185695	0.0160878	0.0199926	0.0146919	0.0187718	0.0160604	0.0182613	0.0158207	0.0155688	0.0204338	0.0168756	0.062723	0.0117805	0.0151664	0.0133953	0.0105096	0.0138641	0.0131241	0.0181226	0.0107131	0.026063	0.0151891	0.0212696	0.0187094	0.02013	0.0116489	0.0124901	0.0154672	0.0185712	0.0204803	0.0261478	0.013908	0.0162907	0.0187852	0.0115433	0.0153065	0.0113997	0.0138339	0.0217643	0.0130222	0.0217122
0.0204143	0.0186491	0.0145268	0.0210443	0.0179098	0.0150172	0.0231595	0.0197469	0.0237567	0.0198651	0.0168855	0.019551	0.0150235	0.0185557	0.0175178	0.01952	0.0236658	0.0112446	0.021851	0.0207402	0.0239283	0.0124139	0.0146699	0.0165049	0.0130064	0.0170946	0.0135342	0.0174987	0.0112524	0.0173233	0.0229916	0.0222899	0.0160118	0.0204248	0.0139356	0.0129849	0.0181685	0.0169357	0.0187486	0.0269578	0.0116524	0.0169022	0.023417	0.0119715	0.0156355	0.0118421	0.0177521	0.0273915	0.0151105	0.0173064
0.0181129	0.0155193	0.0159058	0.0179251	0.0188708	0.012247	0.0194869	0.018655	0.0164189	0.0268245	0.0147007	0.0160125	0.0154286	0.0168141	0.0158736	0.0209367	0.0187641	0.0135163	0.0194042	0.0155047	0.0158801	0.0100647	0.0147072	0.02084	0.0127845	0.0175754	0.0127357	0.0167373	0.0115689	0.0293824	0.0131742	0.0197857	0.0142245	0.0217467	0.00965645	0.0109947	0.022735	0.0183553	0.0206037	0.0215954	0.0109572	0.0243483	0.0162933	0.00972574	0.0122469	0.0105518	0.0160859	0.0237175	0.0153354	0.0255866
0.0170856	0.0180697	0.0151977	0.0153713	0.0228171	0.01234	0.0200126	0.021482	0.0205877	0.015648	0.0160216	0.0168208	0.0164603	0.017234	0.0159943	0.0170949	0.0220578	0.0138285	0.0187536	0.0182263	0.0138469	0.0123285	0.0170989	0.0135872	0.00966123	0.0159081	0.0128324	0.0183438	0.0124471	0.0182501	0.0148179	0.0191054	0.0137593	0.0261079	0.0108525	0.0101065	0.0244877	0.0194043	0.0174823	0.0221163	0.0108397	0.0170151	0.020235	0.0113073	0.0137918	0.0109924	0.0148575	0.023342	0.015176	0.028276
0.0207304	0.0238518	0.0144507	0.0293078	0.0227879	0.0132313	0.0205698	0.0254947	0.0200273	0.019761	0.021408	0.0160824	0.0189301	0.0162307	0.0177816	0.019814	0.0205991	0.0120988	0.0199976	0.0110895	0.0241382	0.0173317	0.0211134	0.0156109	0.0109646	0.0153699	0.0134633	0.0186965	0.0120545	0.0229768	0.0144626	0.0181005	0.0196756	0.0253972	0.013251	0.0127052	0.0215159	0.0175076	0.02619	0.0174891	0.0100604	0.0163826	0.0170548	0.0129354	0.0163444	0.0131544	0.0155988	0.0290645	0.0174363	0.0212932
0.0172557	0.0183149	0.0174193	0.0198567	0.0180781	0.0113358	0.0175601	0.021804	0.0189966	0.0183765	0.0159326	0.0195119	0.0170108	0.0126786	0.0209144	0.016539	0.0176781	0.0116926	0.0189684	0.0124757	0.0228959	0.0115078	0.0176707	0.0199136	0.0112324	0.0164401	0.0154719	0.0183458	0.0110257	0.0264046	0.0200989	0.0296165	0.0174781	0.0197539	0.0114088	0.0114487	0.0257148	0.0156666	0.0214545	0.0191695	0.00954265	0.0220824	0.0236737	0.0103221	0.014503	0.0126636	0.0153544	0.0212509	0.016539	0.0193379
0.0170873	0.0158472	0.0137068	0.0870099	0.093711	0.0990431	0.0712968	0.0886985	0.0758876	0.0773937	0.0490972	0.0711346	0.0126817	0.0119189	0.0172363	0.0157143	0.0198089	0.115332	0.0181967	0.00984789	0.0128019	0.00970464	0.0157324	0.0114638	0.0101452	0.0115269	0.0144497	0.0246185	0.0134362	0.0184952	0.0180301	0.0186087	0.016054	0.0179042	0.00988046	0.00948541	0.017064	0.0169804	0.0151528	0.0159823	0.0110817	0.017729	0.0174114	0.0111576	0.058076	0.0103807	0.0175065	0.0195646	0.0119212	0.0166345
0.0153266	0.0164586	0.0163596	0.0867587	0.0930608	0.0898356	0.0849509	0.0829725	0.0870638	0.0800105	0.045817	0.0745211	0.0117906	0.0126821	0.0170062	0.0160788	0.017057	0.109327	0.0151191	0.00896904	0.0140885	0.00863331	0.012373	0.0124808	0.0106454	0.0154011	0.0118182	0.0168161	0.0102936	0.015367	0.0134031	0.0180325	0.011993	0.0180333	0.0103394	0.0135013	0.0146538	0.0131637	0.015238	0.0126715	0.0102999	0.0159306	0.0162749	0.00907472	0.0551999	0.00924637	0.0185523	0.020181	0.0137224	0.015756
0.0145539	0.0183673	0.0122154	0.252975	0.254364	0.0496955	0.218817	0.234098	0.217639	0.23275	0.143514	0.176498	0.0134753	0.0143166	0.019449	0.0150305	0.0255243	0.0368485	0.0168724	0.0229756	0.0153773	0.0085994	0.0142415	0.0125829	0.00947815	0.0193265	0.0148445	0.017629	0.0121519	0.0198774	0.0154271	0.01876	0.0137741	0.0241943	0.0131269	0.0100862	0.0178398	0.0145689	0.0182011	0.0185119	0.0146614	0.023197	0.0176119	0.0135833	0.0574352	0.0116031	0.0124612	0.0218982	0.0148497	0.0307706
0.0185298	0.0119608	0.0131858	0.0826695	0.0969813	0.0845817	0.0753232	0.0819241	0.0839778	0.0695516	0.0456403	0.0649871	0.0123996	0.0095972	0.0160868	0.0145111	0.0221854	0.118176	0.0184162	0.0116657	0.0132392	0.0118221	0.013599	0.0112087	0.0107068	0.0140881	0.00817955	0.011804	0.0103553	0.0180838	0.0147311	0.0172201	0.0132303	0.0207883	0.00936793	0.0104907	0.0188472	0.0132821	0.0165252	0.017022	0.00847969	0.0167155	0.0188161	0.00899288	0.0497808	0.00930395	0.0137359	0.023477	0.0129511	0.0165898
0.0184341	0.0156716	0.0122432	0.0830051	0.0815397	0.0900416	0.0731955	0.0849838	0.078828	0.0607786	0.0447262	0.0660005	0.0106118	0.0131735	0.0142044	0.0149645	0.0203017	0.115546	0.0170479	0.012548	0.0133904	0.0122717	0.0103721	0.0111412	0.0093958	0.0125866	0.0114693	0.0156842	0.0104735	0.016044	0.0119683	0.0147877	0.0104329	0.0221322	0.0112514	0.0126096	0.0174999	0.0139135	0.0146967	0.0169341	0.00921178	0.0190979	0.0157081	0.00969196	0.0469031	0.00941015	0.0151751	0.0211067	0.0152821	0.0184242
0.0185631	0.0160672	0.017324	0.0849264	0.0944737	0.085041	0.0760507	0.0832741	0.0870101	0.0680046	0.0499868	0.0659112	0.0112275	0.0123615	0.0153484	0.0145372	0.0208142	0.115105	0.0187621	0.0111302	0.0183272	0.0110642	0.0131768	0.0114225	0.008991	0.0119965	0.00968415	0.0141439	0.00975463	0.016845	0.0133061	0.0156236	0.00943511	0.0182682	0.0107045	0.0109666	0.0207383	0.012118	0.0137007	0.0164936	0.00959615	0.0155052	0.0161571	0.0101906	0.0449402	0.00819092	0.0158777	0.0178573	0.0125419	0.0198784
0.0181301	0.0145745	0.0190241	0.0827162	0.0881754	0.0906782	0.069922	0.0783209	0.0756422	0.0560054	0.0435384	0.0643827	0.0149557	0.0164121	0.0160151	0.0207239	0.0188804	0.115236	0.0176826	0.0110518	0.0124188	0.0100709	0.0126292	0.0119253	0.00939753	0.0154392	0.0105311	0.0149847	0.00875561	0.015726	0.0141692	0.0164338	0.014518	0.0195537	0.0084401	0.0103048	0.0187533	0.0129564	0.0138347	0.0177841	0.00857806	0.01597	0.0193365	0.00909721	0.0440396	0.00898407	0.0115438	0.0189116	0.0150666	0.0220473
0.0325877	0.0314056	0.0225949	0.0355575	0.0253677	0.0181241	0.0268134	0.0264149	0.0427194	0.0313762	0.033175	0.0251154	0.0255811	0.027028	0.0217741	0.0266109	0.0309975	0.0279534	0.0343446	0.0351454	0.0225128	0.0183992	0.0202368	0.0244533	0.0212226	0.0303564	0.0219885	0.0286498	0.020407	0.0261809	0.0232501	0.0321745	0.0203554	0.0431383	0.0140923	0.0179835	0.0467444	0.0280542	0.0250795	0.0253306	0.0228935	0.0255445	0.0312193	0.0190597	0.0218678	0.0213273	0.0220891	0.0621874	0.0225626	0.0340019
0.0144982	0.0163589	0.0134569	0.0227695	0.0172853	0.0171703	0.0168566	0.0211726	0.0167104	0.013567	0.0149671	0.0142102	0.0150922	0.0144625	0.0158964	0.0171228	0.0215574	0.0119044	0.0236423	0.0226709	0.0147357	0.00855408	0.013416	0.0134345	0.00914866	0.0182718	0.0104157	0.0170504	0.0104237	0.0177756	0.0157857	0.0175299	0.0141927	0.0174068	0.00971988	0.00993836	0.0176318	0.0145194	0.0144855	0.0133186	0.0112422	0.01638	0.0161143	0.0100956	0.0113907	0.00892217	0.0129364	0.0202992	0.0134377	0.0205882
0.0212365	0.0150195	0.0138932	0.0162707	0.0161014	0.0126128	0.0216498	0.0192875	0.0210788	0.0138029	0.0103994	0.0227104	0.0129062	0.0149443	0.0143963	0.019571	0.0242219	0.0112739	0.0232297	0.0104398	0.0122142	0.00894544	0.0108093	0.0104598	0.00958733	0.0166799	0.011529	0.0185297	0.00975952	0.0186024	0.0136153	0.0183181	0.0113784	0.0176833	0.0110583	0.00994343	0.0191616	0.0152443	0.0150997	0.0201379	0.0120406	0.0174521	0.0202066	0.00947535	0.0121656	0.00874254	0.0142971	0.0186288	0.0133866	0.0220076
0.0280218	0.0158377	0.0146929	0.0182442	0.0231096	0.0119031	0.0190023	0.0229473	0.0157086	0.0199233	0.0157869	0.0198831	0.0176554	0.0141452	0.0151869	0.0179588	0.0243638	0.0103452	0.0219745	0.0114626	0.021621	0.0103845	0.0148827	0.0133705	0.0108936	0.01653	0.0144411	0.0151704	0.0105056	0.018099	0.0146561	0.0212959	0.0160587	0.0230192	0.01066	0.0107035	0.0161261	0.0138186	0.0176373	0.0281127	0.0116268	0.0187862	0.0253764	0.0107365	0.0156227	0.0121485	0.013851	0.0242745	0.0117899	0.0193468
0.0165027	0.0104245	0.00898019	0.0117683	0.0137849	0.00783472	0.0117995	0.0153439	0.0110288	0.0131137	0.0122803	0.0113709	0.0100969	0.00967558	0.0124441	0.0120479	0.0171618	0.00798783	0.0142144	0.00858033	0.012308	0.0091964	0.0089054	0.00880055	0.00817657	0.0131313	0.0084656	0.0134986	0.00852009	0.0111525	0.0123479	0.0181703	0.0100325	0.0122377	0.00912145	0.0117824	0.0165386	0.0119379	0.0125195	0.0127076	0.00802919	0.017064	0.0200436	0.00777354	0.0113416	0.00709528	0.00979215	0.0156303	0.0108643	0.0148133
0.0224105	0.0169429	0.0159473	0.265754	0.26753	0.0305999	0.23295	0.251164	0.218393	0.232142	0.777562	0.205974	0.0151656	0.0159861	0.0201374	0.0209914	0.0170213	0.0371105	0.0202489	0.0299128	0.0205144	0.00989312	0.0167306	0.0137658	0.0116162	0.0155306	0.0137148	0.0150146	0.0129753	0.0221952	0.0175091	0.0165311	0.0168287	0.0222674	0.0139639	0.0158582	0.0196503	0.0202133	0.0213823	0.0195221	0.0135825	0.0149621	0.0186152	0.0163144	0.0592276	0.0112966	0.0166655	0.0265445	0.0151009	0.019447
0.0250032	0.0276397	0.0202343	0.0300808	0.0259268	0.0160744	0.0243133	0.0237317	0.0218154	0.0242463	0.0198463	0.0208036	0.0161636	0.0169644	0.0168965	0.499166	0.0227338	0.0156074	0.0302263	0.0167357	0.0202017	0.0120505	0.0212282	0.0168425	0.0152471	0.0234952	0.0180017	0.0186773	0.0144678	0.0225295	0.023775	0.0283164	0.0177336	0.0241331	0.0153554	0.0142321	0.0219409	0.0195225	0.0363271	0.0175643	0.0129253	0.022981	0.0202453	0.0133242	0.0174127	0.0131958	0.0211456	0.0266635	0.018812	0.0293997
0.0132442	0.0181013	0.00959593	0.0526657	0.0556551	0.0556321	0.0480027	0.057093	0.0508404	0.0460932	0.027557	0.0378926	0.012854	0.0115931	0.0105258	0.0139844	0.0161912	0.0767898	0.0113823	0.00866054	0.00992263	0.00727537	0.0102501	0.00796627	0.00748904	0.0113542	0.00825254	0.012293	0.00735128	0.0168504	0.0114863	0.0128781	0.0106657	0.0130101	0.00684602	0.00759312	0.0132262	0.0114692	0.0126482	0.0145999	0.00834034	0.0125147	0.0151528	0.00701201	0.025358	0.00737547	0.0107213	0.0203341	0.00975334	0.0139247
0.0163032	0.0138477	0.0129778	0.044574	0.0422159	0.0589602	0.0550838	0.0567797	0.0512765	0.0478311	0.0294709	0.0393295	0.0121472	0.0162133	0.011614	0.0183768	0.0163372	0.0729093	0.0136292	0.00943277	0.0168606	0.00962211	0.0123705	0.010372	0.0091667	0.0123883	0.0091317	0.0107377	0.00843571	0.0147186	0.0134004	0.0133	0.0122391	0.0192421	0.00732331	0.00857491	0.014053	0.0153186	0.0119222	0.0142151	0.00871359	0.013516	0.0182031	0.0083146	0.0294431	0.00795053	0.0123028	0.0217517	0.0135483	0.0142034
0.0127025	0.0115946	0.0142817	0.0153363	0.0141815	0.00973932	0.0150694	0.0160622	0.0168367	0.0144257	0.0152286	0.0150475	0.0113673	0.00974637	0.0132403	0.0111842	0.0126641	0.00822474	0.0125305	0.0103758	0.0136895	0.00793574	0.0115597	0.00840446	0.00855939	0.0131569	0.0110386	0.0127756	0.0102116	0.011144	0.0117142	0.0146734	0.00993962	0.0170809	0.00758984	0.00928233	0.0142121	0.0136869	0.0140588	0.014236	0.00787979	0.0108731	0.0119897	0.00900055	0.0121892	0.00754537	0.0187339	0.0178165	0.00956773	0.0136025
0.0128943	0.0147065	0.0156525	0.0150124	0.013123	0.013391	0.0145054	0.017234	0.0134047	0.0157458	0.0123999	0.0111756	0.0103204	0.015215	0.0146645	0.0134987	0.0169998	0.0106408	0.0161075	0.0124837	0.0124217	0.00867446	0.0103909	0.0099726	0.0112704	0.0142664	0.0123781	0.0125216	0.00990529	0.0166357	0.0142709	0.0154142	0.0106385	0.014874	0.00864987	0.00784578	0.0162011	0.0146083	0.015177	0.0160258	0.00914896	0.0152008	0.0124293	0.00846653	0.00961	0.00903445	0.0137191	0.0166454	0.0109591	0.0127249
0.0132877	0.0131882	0.00945557	0.0552297	0.0529989	0.0544745	0.0462811	0.0582354	0.0505501	0.0455809	0.0252026	0.0333185	0.00986182	0.00999555	0.0111697	0.0115412	0.0134436	0.0778245	0.0131575	0.0114872	0.0101467	0.00742301	0.0111703	0.0115276	0.00701276	0.0119517	0.00931464	0.011413	0.008113	0.0196815	0.0107558	0.012662	0.00927403	0.0171137	0.00908043	0.00943192	0.0154813	0.0103751	0.0122366	0.0146479	0.00799309	0.0123096	0.0133023	0.00633157	0.0257425	0.00773608	0.00958005	0.0172889	0.00978541	0.0150054
0.0181325	0.0182549	0.0155913	0.0194398	0.0188676	0.0118143	0.0165302	0.0190325	0.0228896	0.0172987	0.0229384	0.0156959	0.0160131	0.0125033	0.0161948	0.0219381	0.0192689	0.00978389	0.0205732	0.0147376	0.0158655	0.0112198	0.0146937	0.016823	0.010182	0.0198559	0.0131774	0.0181333	0.0117245	0.0181488	0.0174185	0.0250512	0.016453	0.0253986	0.00910145	0.00945374	0.0199801	0.0162226	0.0173617	0.0180452	0.0099594	0.0204023	0.0185711	0.0117335	0.0134171	0.0103431	0.0131399	0.0264925	0.0166427	0.023058
0.0150355	0.0178279	0.0136415	0.0167395	0.0176697	0.0125141	0.0197378	0.0193094	0.0238437	0.019967	0.01785	0.0209348	0.0165238	0.0124413	0.0186423	0.0161959	0.0222236	0.00973534	0.0181536	0.0126023	0.0166804	0.0107792	0.0259312	0.0148265	0.0109108	0.0174329	0.0167925	0.0166113	0.0101364	0.0180588	0.0179298	0.0233187	0.0185912	0.0261752	0.010143	0.0116645	0.0210279	0.0146746	0.020096	0.0176104	0.0101043	0.0199181	0.016631	0.0102158	0.0159269	0.00994295	0.0122902	0.0247471	0.0149576	0.0221386
0.0277492	0.0266719	0.015724	0.0218674	0.0246595	0.0147751	0.0254845	0.021829	0.0189742	0.0202373	0.0212024	0.0204428	0.0237999	0.0201009	0.0185744	0.0226228	0.0256161	0.0138637	0.0200655	0.0175418	0.0256542	0.012631	0.0199881	0.0156923	0.0175798	0.0218465	0.0144661	0.0211432	0.0159491	0.0220047	0.0298227	0.0208862	0.0254161	0.0209769	0.0123809	0.0164609	0.0203844	0.0168518	0.0212075	0.0184104	0.0146105	0.0219934	0.0227363	0.0124697	0.0179313	0.0112083	0.0239517	0.0382446	0.0171621	0.0225617
0.0221725	0.0187396	0.0154858	0.0182855	0.0180952	0.014084	0.0187658	0.0198759	0.0174934	0.0188026	0.0175807	0.0145195	0.0164383	0.0259451	0.0155318	0.0196147	0.0204681	0.0177241	0.0194083	0.012765	0.0185463	0.0138773	0.0150671	0.0148897	0.012557	0.0193604	0.0123127	0.0165812	0.0100279	0.0180113	0.0173007	0.0202022	0.0172772	0.0266207	0.0132562	0.0104811	0.0200465	0.0166711	0.0215669	0.0184824	0.0129478	0.0196655	0.0193781	0.0103622	0.0156069	0.0099085	0.0199951	0.022919	0.0151719	0.0228641
0.0224626	0.0196112	0.0198831	0.0243984	0.0273639	0.0160288	0.0261049	0.0357215	0.0223042	0.0215761	0.0221785	0.0184048	0.0219337	0.0214307	0.0234875	0.0225798	0.024135	0.0147809	0.0242077	0.0247137	0.0238781	0.0151499	0.0217124	0.101428	0.014199	0.0215978	0.0150878	0.0221244	0.011429	0.0240326	0.0252622	0.0246119	0.0198175	0.0296001	0.0163679	0.0180983	0.206741	0.0196777	0.0226104	0.0216415	0.0150106	0.239508	0.0210083	0.0135605	0.0187761	0.0114412	0.0160078	0.0352857	0.0233584	0.176593
0.0202503	0.0185864	0.0166271	0.0195264	0.0223743	0.0157151	0.0338291	0.0184662	0.0196639	0.0171197	0.0181899	0.0270826	0.0179343	0.0175766	0.0200777	0.0262634	0.0246796	0.0159696	0.0229427	0.0202571	0.0197501	0.0196761	0.0179103	0.104717	0.0139953	0.0260881	0.0133461	0.0185945	0.0147946	0.0206075	0.0264188	0.0205489	0.0237649	0.0330406	0.0182647	0.0129943	0.236604	0.0190548	0.0228899	0.0209875	0.0142262	0.541818	0.0219526	0.0136079	0.0200597	0.0125301	0.0184222	0.0260103	0.0217688	0.215183
0.031852	0.0206884	0.0190101	0.0249123	0.0276719	0.0150304	0.021981	0.0355265	0.0199421	0.0244668	0.0199971	0.0254335	0.0157281	0.0316895	0.0185696	0.0235794	0.0208449	0.012197	0.021644	0.0153452	0.0187268	0.0142063	0.0180977	0.0281082	0.0119831	0.0174727	0.0160344	0.019572	0.0154222	0.0225356	0.0159286	0.0324203	0.0174454	0.0277564	0.0113875	0.0118282	0.0245596	0.0188531	0.021202	0.0212373	0.0132789	0.0261759	0.0308124	0.0104719	0.016006	0.0107286	0.0175124	0.0374995	0.0219034	0.0258568
0.0246331	0.0183698	0.0172633	0.015513	0.0164482	0.0154378	0.0272198	0.0169606	0.0155478	0.0181166	0.0133654	0.0161675	0.0131842	0.0151608	0.0138044	0.0202765	0.0237971	0.0165136	0.0203263	0.0150158	0.0136048	0.0131875	0.0142434	0.0123472	0.0110271	0.0210601	0.0121056	0.0139344	0.0151919	0.0167616	0.0160227	0.0215569	0.0140514	0.02599	0.0102512	0.0113952	0.0204996	0.0180678	0.0217043	0.0174858	0.0117693	0.0174952	0.0223848	0.00941903	0.0146515	0.0133367	0.0122033	0.0229695	0.0190951	0.0211827
0.0199964	0.0183206	0.0193114	0.022616	0.0219145	0.0148899	0.0212966	0.0343348	0.0229887	0.0226743	0.0192734	0.0223075	0.0186869	0.0161165	0.0232124	0.0218519	0.0242853	0.017212	0.0190799	0.016833	0.0184867	0.0136531	0.0185189	0.0181737	0.0123391	0.0220809	0.017482	0.0203147	0.0140501	0.0273489	0.0193037	0.0213881	0.0175731	0.0234364	0.0144533	0.0133447	0.0232445	0.0156132	0.208544	0.0174946	0.0147673	0.0189214	0.0187246	0.0161745	0.0148333	0.0130358	0.0162294	0.0293009	0.0206371	0.0219231
0.0102871	0.0105483	0.00762533	0.0386008	0.0396684	0.0597826	0.0452232	0.0338751	0.0444363	0.0323865	0.0276957	0.0335349	0.0105988	0.0112851	0.0113496	0.0144536	0.0124225	0.0821039	0.0121122	0.0146319	0.00781215	0.0103162	0.00943715	0.00858978	0.00666524	0.0119274	0.00800053	0.0101243	0.00937778	0.0138777	0.0103932	0.0137538	0.00996711	0.0151813	0.00939761	0.00600699	0.016567	0.0120483	0.0114579	0.0122063	0.0104142	0.0135404	0.0111681	0.0100891	0.0407303	0.00606688	0.00730555	0.0208579	0.0102033	0.012852
0.0160206	0.014934	0.0163879	0.0214695	0.0225536	0.01128	0.0149294	0.0178049	0.0139037	0.018035	0.0187077	0.0153431	0.014148	0.0163195	0.0134669	0.0162566	0.0170246	0.00954478	0.0164622	0.0140383	0.0166624	0.0114512	0.0154317	0.0123156	0.0124561	0.0154793	0.0110298	0.0139868	0.0115477	0.0198694	0.0137977	0.0199914	0.0123192	0.0232418	0.00868469	0.00868674	0.0166345	0.0135513	0.0187831	0.0190095	0.0129403	0.0170057	0.0187052	0.00858502	0.014142	0.0100678	0.019736	0.0219738	0.0137556	0.0153687
0.0193666	0.0158369	0.0116428	0.0191657	0.0199474	0.0112849	0.0165594	0.0204515	0.0173872	0.017737	0.0140369	0.0147593	0.0107467	0.0133124	0.0174023	0.0143871	0.0193545	0.00954892	0.0205866	0.0105842	0.0198448	0.00974631	0.0164187	0.0121085	0.00865381	0.0139374	0.0112389	0.0119576	0.0091742	0.0170882	0.020971	0.0178572	0.0128176	0.0172384	0.00852756	0.0132029	0.0186795	0.012775	0.0187912	0.0168706	0.00966628	0.0163325	0.0167434	0.00956106	0.0120675	0.00883249	0.0127759	0.028196	0.0132871	0.0128724
0.0172696	0.0169123	0.0136803	0.0222499	0.0210611	0.00936868	0.0177436	0.0225327	0.0148077	0.015518	0.0126832	0.0167073	0.0133007	0.0122555	0.0156124	0.0155656	0.0207757	0.0109006	0.0174108	0.0127121	0.0152342	0.00967774	0.0119568	0.0151328	0.0104715	0.0138526	0.0129615	0.0121653	0.00944996	0.0142932	0.0152836	0.0181229	0.0137106	0.0179957	0.0087926	0.0101115	0.014914	0.015265	0.0220048	0.0206536	0.00976967	0.0149419	0.0140964	0.00822315	0.01137	0.00937521	0.012694	0.0233177	0.0131976	0.0177954
0.0151329	0.0186582	0.0157939	0.0186367	0.0204189	0.0106868	0.0156964	0.0179396	0.0140089	0.0175554	0.0157077	0.0172429	0.0137271	0.0131543	0.0149822	0.0176396	0.0179331	0.011613	0.0152045	0.0141445	0.0183874	0.0118823	0.0120932	0.0145481	0.0139448	0.0132569	0.0109074	0.0158862	0.011635	0.0270442	0.0149715	0.020862	0.0101782	0.0242251	0.00875037	0.00942571	0.0136819	0.0144415	0.0217639	0.0139016	0.0119951	0.0171343	0.0132257	0.0101188	0.0125726	0.00858332	0.0131009	0.0202147	0.0145766	0.0165652
0.0227654	0.0161155	0.0140237	0.0188304	0.016638	0.0126832	0.0168507	0.0177903	0.0164063	0.0158707	0.0119032	0.0153194	0.0133363	0.0150802	0.0145666	0.0216421	0.0153621	0.0102669	0.0199014	0.0107704	0.0158859	0.0093958	0.0124683	0.0140508	0.00951055	0.0157585	0.0110208	0.0183814	0.00968137	0.0149047	0.0153972	0.0221691	0.0155513	0.0175417	0.00949623	0.0105441	0.0169345	0.0145916	0.0258145	0.0127975	0.0117685	0.0197361	0.016704	0.0112134	0.0118564	0.0080418	0.014419	0.028692	0.0200398	0.0160097
0.0167402	0.0142783	0.0107955	0.0815385	0.080434	0.0994829	0.0554479	0.0744185	0.0629006	0.0639615	0.0409286	0.0559586	0.00985567	0.0112153	0.0151711	0.0124951	0.0166774	0.109238	0.016664	0.0245545	0.0111927	0.00790263	0.0111338	0.0108164	0.00772799	0.0121309	0.0102446	0.0135521	0.0113122	0.0142055	0.0122687	0.0134289	0.0111991	0.0135037	0.0109653	0.0117825	0.0156967	0.0167469	0.0112854	0.0160989	0.00878899	0.0167922	0.0126016	0.0112979	0.0392792	0.00764722	0.0110998	0.0153488	0.0143115	0.0137248
0.0161321	0.0154436	0.0138823	0.113981	0.107652	0.12755	0.0824479	0.100439	0.0912846	0.0824634	0.0584122	0.0786037	0.0144306	0.0183439	0.0176604	0.0200303	0.0230508	0.117207	0.0258289	0.0123494	0.0196213	0.0117191	0.014042	0.0121726	0.0116677	0.0142096	0.012398	0.0162936	0.0156526	0.0199833	0.0143163	0.0244778	0.0144013	0.0225215	0.0112083	0.0122054	0.0152637	0.020798	0.0168905	0.0227462	0.0100849	0.0183506	0.0154925	0.0129274	0.0621828	0.00870514	0.0172255	0.030606	0.0141291	0.0168734
0.0128687	0.0140196	0.0131389	0.0213177	0.0164384	0.012136	0.0198587	0.0149238	0.0148323	0.0143481	0.0128494	0.0136023	0.0131763	0.0149414	0.0131691	0.0175567	0.0142698	0.0108684	0.0186853	0.0150069	0.0150747	0.00873873	0.0106763	0.0103227	0.00841043	0.0131908	0.0106147	0.0127894	0.0101061	0.0163621	0.0142339	0.0203473	0.0125975	0.0164581	0.00714459	0.00770119	0.0184956	0.0126691	0.0170557	0.0123356	0.00954483	0.0156793	0.0167787	0.00787472	0.0108078	0.00895799	0.00973089	0.0156154	0.0103371	0.0149789
0.02749	0.0191883	0.0242567	0.0261167	0.0236912	0.024128	0.0213852	0.0217257	0.0296702	0.0211486	0.0239686	0.0233301	0.0172635	0.0219197	0.0217216	0.0298691	0.0229453	0.0195795	0.0293776	0.0201088	0.029626	0.012951	0.0282449	0.0178387	0.014534	0.0237988	0.0181692	0.0217835	0.0125883	0.0264141	0.019669	0.0252867	0.0271929	0.0297044	0.0153658	0.0159606	0.0268425	0.0236106	0.0232057	0.0267684	0.0164846	0.025772	0.0286503	0.0130746	0.0208978	0.014033	0.0172116	0.0314756	0.0234407	0.0329703
0.0295041	0.018021	0.0196621	0.0217828	0.0201802	0.0127566	0.0250469	0.0226698	0.0234996	0.0223035	0.033906	0.0231847	0.018749	0.0253647	0.0177151	0.0228106	0.0293173	0.0164251	0.0192491	0.0128465	0.0256066	0.0196651	0.0178724	0.0172806	0.019177	0.0238918	0.0206353	0.0153437	0.0133438	0.0259234	0.0160095	0.0225411	0.0169401	0.0224909	0.0169249	0.0192209	0.0200064	0.0241338	0.0180096	0.0215107	0.0169468	0.0262477	0.0244044	0.0129553	0.0154662	0.0171693	0.0182446	0.0274812	0.0153079	0.0210631
0.0223845	0.0265283	0.0236779	0.0233497	0.0266617	0.0173947	0.0194137	0.024504	0.0211928	0.0282581	0.0230777	0.0224629	0.0189964	0.0218445	0.029496	0.0334339	0.0322619	0.0153425	0.0888976	0.0177018	0.0196557	0.0151803	0.021312	0.0188595	0.012857	0.0233818	0.0192524	0.0230481	0.0181613	0.0429663	0.0182766	0.0912396	0.0250098	0.032686	0.0157421	0.0145346	0.0295368	0.024091	0.0238327	0.0261207	0.0125098	0.0406889	0.0196295	0.0137998	0.0177178	0.0157223	0.0159931	0.0294397	0.0193452	0.0239705
0.0181271	0.0190541	0.0133088	0.0202171	0.0160618	0.0110306	0.0139896	0.0144966	0.0147103	0.0144937	0.0145597	0.0193318	0.011971	0.0108221	0.012819	0.0137451	0.0160109	0.0093152	0.0168528	0.0124531	0.0200646	0.00942992	0.01267	0.00970181	0.00909766	0.010898	0.0109173	0.013154	0.00878391	0.0141241	0.015326	0.0147723	0.0121071	0.0169273	0.00790289	0.00907288	0.0169743	0.013255	0.0207806	0.0126873	0.0074371	0.0152468	0.0172571	0.0089371	0.0139845	0.00694344	0.0102085	0.0275913	0.0149254	0.0166384
0.0207914	0.0190386	0.0165155	0.0258393	0.0232028	0.0141462	0.0188072	0.0195843	0.0215156	0.0168277	0.0188207	0.0183804	0.0185984	0.0210959	0.0170708	0.0258155	0.0224214	0.012523	0.0248424	0.0135582	0.017242	0.0131229	0.0205816	0.0159958	0.0152882	0.0160711	0.0130198	0.0132628	0.0123008	0.0292898	0.0184511	0.024307	0.0178468	0.0313482	0.0125815	0.0154886	0.0216394	0.0188766	0.0244899	0.019988	0.0132476	0.0197089	0.0251965	0.0161917	0.0159682	0.0136876	0.0161458	0.0297573	0.0168355	0.0207112
0.0214638	0.0216086	0.0122735	0.0189654	0.017642	0.0114069	0.0156537	0.018932	0.0163295	0.0189557	0.0176044	0.0162642	0.0162472	0.0201824	0.0148206	0.0229768	0.0217722	0.0132359	0.0216616	0.0128502	0.0157937	0.00942107	0.0143459	0.0146305	0.0119202	0.0162946	0.0119626	0.136381	0.0105308	0.015612	0.0140166	0.0172182	0.0186741	0.0188672	0.00868041	0.0111266	0.0280691	0.0143648	0.0201319	0.0190132	0.0114919	0.0207005	0.0154508	0.0119049	0.0143297	0.0115615	0.0149318	0.0224912	0.0136177	0.0209324
0.0340202	0.0249643	0.0198512	0.0249139	0.0246547	0.0202496	0.0271269	0.0268866	0.0238347	0.0330271	0.0227765	0.0240602	0.024035	0.0250795	0.022306	0.0312287	0.0441715	0.0172551	0.0321613	0.0228118	0.0226452	0.018118	0.0204733	0.0220763	0.0193973	0.0205114	0.0191541	0.020737	0.0141938	0.0298463	0.0232596	0.0261993	0.0195888	0.0285917	0.0147538	0.016006	0.034603	0.0403758	0.0274419	0.0331272	0.021104	0.0298141	0.0287664	0.0148596	0.0173827	0.0176823	0.0179868	0.0301883	0.0367448	0.0429882
0.0172666	0.0208417	0.016573	0.0178823	0.0208422	0.00992501	0.0160092	0.0218177	0.017868	0.0191235	0.0165678	0.0202341	0.0160758	0.015405	0.0151894	0.0206867	0.0325854	0.013	0.0198056	0.0110149	0.0140007	0.0154219	0.013556	0.0158387	0.0147777	0.0148985	0.0152358	0.0174394	0.0145059	0.0184529	0.0213884	0.0206157	0.0171926	0.0192842	0.0121899	0.0134657	0.0236888	0.01599	0.0169484	0.0158616	0.0134926	0.0180043	0.016582	0.0116928	0.0142619	0.0119262	0.014526	0.037356	0.0139814	0.01806
0.0218818	0.0199583	0.01617	0.0191562	0.0173085	0.0114623	0.0167769	0.0203697	0.0163345	0.02428	0.0170347	0.0163683	0.0135434	0.0199423	0.015564	0.0193138	0.0214644	0.0147586	0.0172961	0.0120561	0.0156725	0.0131447	0.0163679	0.0136534	0.0119965	0.0182151	0.0151939	0.0208407	0.0117758	0.0228537	0.0160579	0.0166533	0.0136681	0.0212194	0.0103413	0.0113734	0.0222567	0.0170853	0.0177612	0.0158491	0.0126169	0.022727	0.0211008	0.0114366	0.0136348	0.0117169	0.0128806	0.0307156	0.0149508	0.0202779
0.0179621	0.0172872	0.0154346	0.0147573	0.0152675	0.0107701	0.0210916	0.0194186	0.0186102	0.0170715	0.0192599	0.018276	0.013302	0.0127469	0.0162385	0.017777	0.0200372	0.0118863	0.0188054	0.00991635	0.0139651	0.0114542	0.0161671	0.0105649	0.00913474	0.0175516	0.0130665	0.013686	0.0105186	0.0226535	0.0107772	0.0177622	0.0160117	0.0215656	0.00930848	0.00915991	0.0144779	0.0156125	0.0127151	0.0171232	0.00928544	0.0141596	0.0186603	0.0126649	0.0126706	0.00943659	0.0122599	0.0218274	0.0168575	0.013428
0.0148191	0.0180582	0.0118915	0.019658	0.0166744	0.0112923	0.0168631	0.0177545	0.0137317	0.0222353	0.0152184	0.0164456	0.012623	0.0120963	0.0153724	0.0153575	0.0226623	0.00850645	0.0171716	0.0103788	0.0152411	0.0103335	0.0136526	0.0102302	0.00947907	0.0163291	0.0108056	0.011051	0.0141175	0.0154774	0.0117812	0.0229326	0.0132671	0.0200635	0.00926784	0.0086797	0.0189214	0.011817	0.0174484	0.0144823	0.00912766	0.0167076	0.0164305	0.00964039	0.0108057	0.00892562	0.0100899	0.0225634	0.0136669	0.0148562
0.0165959	0.023134	0.0158976	0.0208456	0.0231292	0.0104643	0.0155173	0.0198631	0.0151081	0.0151995	0.0151558	0.0146715	0.0102718	0.0132043	0.0142188	0.0194313	0.0210892	0.0103324	0.0163975	0.0165366	0.0174505	0.0104597	0.0189723	0.0125886	0.00942942	0.0138149	0.0109376	0.0116724	0.0107174	0.0163331	0.0172534	0.0170682	0.0169632	0.0206917	0.0115341	0.0115013	0.0175295	0.0122105	0.0140694	0.0161251	0.00989909	0.0149604	0.0144346	0.0159538	0.0107388	0.00888654	0.0133215	0.0242094	0.0185963	0.0150377
0.0194383	0.0136485	0.0159604	0.0139096	0.0175723	0.00844756	0.0139584	0.0168395	0.0141565	0.0164333	0.0125716	0.0158624	0.0117376	0.0116978	0.0153343	0.0154063	0.0176808	0.00887486	0.015672	0.0116669	0.0127968	0.0090352	0.0182163	0.0100835	0.00930056	0.011789	0.0126279	0.0145829	0.00882517	0.0174907	0.0114118	0.0185521	0.0154533	0.015439	0.011384	0.0100285	0.0170338	0.014477	0.0143052	0.0153842	0.00943022	0.0170656	0.0188181	0.00870815	0.0124849	0.00818806	0.0106101	0.0226846	0.0150876	0.0214561
0.0193333	0.0207614	0.0134519	0.0170069	0.0176715	0.0134364	0.0229776	0.0174015	0.0195244	0.0208544	0.0150507	0.0186107	0.0151765	0.0210069	0.0195019	0.0169018	0.0219146	0.0118227	0.015893	0.0109995	0.0170225	0.0176005	0.0160806	0.0224128	0.0153658	0.0189292	0.0257666	0.013094	0.01246	0.0251279	0.0146869	0.0215979	0.0145891	0.0237277	0.0138705	0.0137623	0.0231604	0.0241527	0.0169247	0.0217069	0.011549	0.020139	0.018164	0.0150126	0.0144562	0.0115639	0.0158407	0.0233662	0.0155697	0.025764
0.0273095	0.0186027	0.0153727	0.0217824	0.019959	0.0104859	0.0202142	0.0173147	0.0189093	0.019412	0.0184042	0.0205393	0.0140785	0.0168638	0.0188448	0.0179443	0.0283516	0.0136359	0.0201043	0.0114295	0.0197029	0.0116887	0.0143588	0.0137437	0.0124653	0.0166985	0.0902992	0.0167707	0.0116138	0.0174541	0.0136099	0.0209266	0.0183546	0.0288732	0.0117846	0.0108126	0.0199002	0.0155946	0.0206448	0.0161009	0.0109569	0.0211834	0.0272519	0.0120669	0.0157469	0.013241	0.0164464	0.0250851	0.0141922	0.0205148
0.021964	0.016657	0.0150998	0.0206309	0.0171351	0.00957693	0.0220819	0.0202269	0.0151554	0.0218206	0.0168088	0.0174424	0.0134426	0.0142818	0.0175241	0.0167375	0.0233045	0.0130565	0.017979	0.0124811	0.0147499	0.0102942	0.0147533	0.0111313	0.0133144	0.0129489	0.0129859	0.0153169	0.01288	0.0209955	0.0159816	0.0183162	0.0148398	0.0245825	0.0118393	0.0115523	0.0177965	0.0130801	0.0157127	0.0157311	0.010392	0.0197264	0.016471	0.0115629	0.0129901	0.018658	0.011395	0.0266403	0.0171944	0.020331
0.0290424	0.0204509	0.0196502	0.0155485	0.0181844	0.0122481	0.0236114	0.0188136	0.0198334	0.020058	0.0185321	0.0189403	0.0186869	0.0200561	0.0176094	0.0200681	0.0226294	0.0184965	0.0239722	0.0139307	0.0241459	0.0109712	0.0167719	0.0205969	0.0180151	0.0198728	0.0163165	0.0192264	0.0111432	0.0233709	0.0158971	0.0249527	0.0224936	0.024008	0.013765	0.0128681	0.0266344	0.0159849	0.0196487	0.0240551	0.0174746	0.0223176	0.0271507	0.0120153	0.01602	0.0148034	0.015567	0.0197611	0.0250351	0.0209034
0.0199165	0.0228673	0.01444	0.0156192	0.0143527	0.00985685	0.0164437	0.0174479	0.0188562	0.0196173	0.0160898	0.017607	0.0150443	0.0135686	0.018953	0.0183034	0.0182968	0.0121658	0.0231685	0.0146605	0.0151869	0.00885188	0.0126862	0.0153005	0.0099339	0.01859	0.0167879	0.0117393	0.010516	0.0219786	0.0170286	0.018891	0.0127606	0.0207539	0.00941596	0.0107209	0.0179644	0.0137904	0.0176233	0.0189864	0.01049	0.0183808	0.0166265	0.00984827	0.010537	0.00889388	0.0128097	0.0198998	0.0138853	0.0185108
0.01935	0.0218512	0.0167201	0.0310036	0.0239132	0.0125494	0.0241921	0.0323146	0.0222455	0.0206754	0.015781	0.0207718	0.0180828	0.0194077	0.0220747	0.0233032	0.0186933	0.0139211	0.0269845	0.0146038	0.0186192	0.0146273	0.0182584	0.0172931	0.0114626	0.0199426	0.0132515	0.019658	0.0117206	0.0202094	0.0216098	0.0216822	0.0163248	0.027657	0.0142081	0.014758	0.0215559	0.0197849	0.0181493	0.0249704	0.0116701	0.0239435	0.0208372	0.0105089	0.0169375	0.0132558	0.0179483	0.0290131	0.0170235	0.0236812
0.0181196	0.0196088	0.016792	0.0204337	0.0218719	0.0142414	0.0192587	0.0253932	0.0171549	0.0200683	0.0206667	0.0189986	0.0155469	0.018385	0.0191277	0.0276292	0.0297986	0.0152338	0.022516	0.013614	0.0180316	0.0118681	0.0151535	0.0174254	0.010921	0.0140059	0.0116046	0.0234381	0.0126497	0.0281665	0.0224451	0.0247891	0.0171088	0.0293435	0.0109647	0.0105455	0.0222874	0.0167799	0.0201571	0.0189678	0.010456	0.0240466	0.0182298	0.0124749	0.0147039	0.011342	0.0146573	0.0283457	0.0167681	0.0257208
0.0159345	0.0147977	0.0124087	0.0151742	0.0153108	0.0100093	0.0166643	0.0157416	0.0170788	0.013217	0.0156816	0.0140868	0.0106204	0.0124389	0.0141528	0.0149255	0.0142901	0.0100579	0.0157559	0.0104464	0.0121505	0.00769792	0.0121357	0.0103287	0.0124671	0.0137113	0.0106716	0.011912	0.00856644	0.0191543	0.0119509	0.0157572	0.0113191	0.0198532	0.00869237	0.00782498	0.0152901	0.0124417	0.0217137	0.0140856	0.00932525	0.015625	0.0141891	0.00977613	0.00861762	0.00948758	0.01485	0.0206545	0.0136728	0.0157757
0.0183579	0.0196494	0.0197233	0.0178113	0.0204461	0.0283253	0.0189014	0.0174244	0.0163582	0.0168132	0.0154123	0.0168655	0.0172364	0.0154341	0.022391	0.0138238	0.0221164	0.01379	0.0218229	0.0258919	0.0173997	0.0103224	0.0132087	0.0109921	0.0115679	0.0150248	0.0112346	0.0172787	0.0179485	0.0172935	0.0148807	0.0234856	0.0156776	0.0233373	0.0109274	0.0126115	0.0190385	0.0182686	0.0212702	0.0188482	0.0150724	0.0194408	0.0201733	0.00873476	0.0139062	0.00835229	0.0147744	0.025244	0.0194393	0.0242842
0.0163577	0.0170213	0.0110987	0.0248468	0.0216079	0.013816	0.0166462	0.0184144	0.0198088	0.0216009	0.0186571	0.0208505	0.018813	0.0140218	0.0191864	0.0203104	0.0176401	0.0147788	0.0199357	0.016928	0.0171826	0.0128569	0.0192637	0.0133108	0.0106478	0.0167606	0.0137354	0.123766	0.00948415	0.0174815	0.0220771	0.0199374	0.0160068	0.0255768	0.0111817	0.0119953	0.0197333	0.0178215	0.0206947	0.0195696	0.0117991	0.0217084	0.0201974	0.00867721	0.0170668	0.00970955	0.0142906	0.0223227	0.0132454	0.0219977
0.0131359	0.0117552	0.0108138	0.0453714	0.0443949	0.0754855	0.0438305	0.0473273	0.0409676	0.0474147	0.0356912	0.0432629	0.0101094	0.0118188	0.0134237	0.0127866	0.013138	0.0806067	0.021438	0.020882	0.0110216	0.0100241	0.0113417	0.0124535	0.0084109	0.0133391	0.00914228	0.0123637	0.00864934	0.0137194	0.0120812	0.017356	0.0102674	0.0148435	0.0109218	0.00941086	0.0141469	0.0126698	0.0144951	0.0132501	0.00892094	0.0141733	0.012409	0.00750015	0.0353084	0.00776938	0.0130803	0.0184319	0.0107983	0.0154457
0.0245607	0.023078	0.0152927	0.0285595	0.0282624	0.0170349	0.023883	0.0285094	0.0249972	0.0230564	0.0219882	0.0309405	0.018798	0.020323	0.0221942	0.029332	0.0291845	0.0215351	0.022083	0.0175917	0.0199492	0.0150925	0.0319946	0.0183598	0.0143221	0.0227816	0.017661	0.0257314	0.0196821	0.0288581	0.0190376	0.0334942	0.0203972	0.0287508	0.0130184	0.0138296	0.0281041	0.0278066	0.0270681	0.0253825	0.0174578	0.023151	0.0319968	0.0131118	0.0153041	0.0113979	0.0269107	0.035152	0.0222519	0.0249859
0.0258272	0.0310045	0.0233095	0.0243126	0.0246765	0.0197008	0.0232769	0.0354713	0.0238559	0.0259617	0.0264813	0.0478921	0.0242301	0.0227452	0.0270056	0.027142	0.0299409	0.0173347	0.0233026	0.0172797	0.0289522	0.0161289	0.0198792	0.0200379	0.0173054	0.0272674	0.0169622	0.0278382	0.0121794	0.0256586	0.0230366	0.029646	0.0209258	0.0287397	0.0130523	0.0135575	0.030114	0.0211496	0.0342689	0.0237257	0.0169334	0.0269606	0.0235357	0.0204832	0.0188409	0.0137396	0.0258553	0.0396694	0.0232762	0.0276572
0.0272294	0.0264411	0.0148416	0.0263737	0.0232624	0.0131508	0.0214079	0.0263274	0.0186493	0.0238771	0.0220998	0.0240719	0.0204653	0.0196114	0.0214281	0.0265906	0.0308948	0.0159428	0.0369098	0.0197769	0.0183638	0.0154271	0.0191333	0.0246948	0.0150149	0.0192563	0.0191457	0.0256029	0.0147387	0.0235982	0.0198051	0.0371802	0.0196732	0.0278231	0.0145167	0.0121789	0.0276959	0.0185466	0.029887	0.0388513	0.0149747	0.0259765	0.0227851	0.0123715	0.022743	0.0126364	0.0189428	0.0323382	0.0234656	0.0254364
0.0249357	0.0177503	0.0165344	0.0241162	0.0271954	0.0160086	0.0242477	0.0251936	0.0241447	0.0202423	0.021618	0.0265532	0.0177948	0.0200365	0.0242956	0.0244184	0.0354772	0.0128431	0.0267877	0.017273	0.0202089	0.0179929	0.0232913	0.0191088	0.0141001	0.0249693	0.0149133	0.0172722	0.013264	0.0290027	0.0175711	0.0260649	0.0213361	0.0272166	0.0163849	0.0173028	0.0276686	0.0181423	0.0313617	0.0213449	0.0158201	0.0300302	0.0250744	0.020353	0.019069	0.0123609	0.0177413	0.0429887	0.0169135	0.0309506
0.033175	0.0255211	0.0198799	0.0230392	0.0233695	0.0135049	0.0282979	0.0258736	0.0214903	0.0223879	0.0240139	0.0277844	0.0223871	0.021453	0.0205482	0.0239872	0.0256393	0.0160162	0.0340894	0.0202228	0.0216768	0.0211609	0.0196486	0.025549	0.0159891	0.0233938	0.0188777	0.0266076	0.0168795	0.0249226	0.0231352	0.0255234	0.0210527	0.0251561	0.0145835	0.0174785	0.0248635	0.0281752	0.027841	0.0310103	0.0153445	0.025503	0.0309015	0.0124285	0.0174078	0.0129646	0.0174104	0.0558111	0.0223329	0.0236837
0.0223695	0.0257377	0.0241046	0.026565	0.0287923	0.0138629	0.0316962	0.0467228	0.0254144	0.0222433	0.0298532	0.0237306	0.0230787	0.0192311	0.0247136	0.0293342	0.0385282	0.0189672	0.0328373	0.023376	0.0258297	0.0153825	0.0239219	0.02399	0.0129201	0.0227252	0.0164276	0.0189921	0.0162595	0.0260332	0.0233729	0.031446	0.0226468	0.0345307	0.0132428	0.0137554	0.0279533	0.0264487	0.0239788	0.0211365	0.0204845	0.0234465	0.0245077	0.0130277	0.0159299	0.0180926	0.0177849	0.0375044	0.0199828	0.028061
0.0298603	0.0320659	0.0194273	0.0320835	0.0275721	0.0245301	0.0323549	0.0303415	0.0282706	0.0265664	0.0272309	0.0271519	0.035495	0.0301633	0.0308379	0.0255721	0.0296712	0.0262394	0.0412034	0.0270433	0.0256904	0.0231549	0.0300542	0.0260529	0.0243221	0.0263784	0.0245392	0.0331525	0.025177	0.0294045	0.0244172	0.0419762	0.0258218	0.039948	0.0221995	0.028183	0.0277686	0.0219827	0.0328087	0.0282144	0.0180824	0.0356448	0.035231	0.0252572	0.0260488	0.0233594	0.0243341	0.0451791	0.030918	0.031976
0.0197115	0.0249029	0.0187023	0.0206545	0.0200611	0.0128674	0.0195435	0.0225274	0.0175644	0.0191148	0.0168496	0.0167424	0.0148666	0.0162814	0.0181939	0.0170152	0.0197147	0.0123042	0.0218434	0.017199	0.0147011	0.0114794	0.0136153	0.0127862	0.0120202	0.0140414	0.012063	0.0147244	0.0102259	0.0238164	0.0165924	0.0181895	0.0139805	0.0296985	0.00968448	0.0174104	0.0239804	0.0135801	0.0177633	0.0166874	0.0115884	0.0157542	0.0171006	0.0118173	0.0134866	0.0100443	0.0142505	0.0265522	0.013732	0.0198665
0.0260236	0.0265378	0.0215331	0.0263527	0.0320054	0.0161798	0.0282481	0.0310894	0.0275032	0.0327024	0.0287396	0.0203308	0.0247041	0.0168444	0.0198406	0.0357134	0.0392894	0.0143683	0.0248753	0.0154946	0.0206219	0.0167353	0.0177663	0.0184812	0.0131753	0.0210511	0.0162963	0.022134	0.0175519	0.0233871	0.0303115	0.0226562	0.0223381	0.0268847	0.0169142	0.020598	0.0283162	0.0231545	0.0334912	0.025574	0.0147043	0.0259021	0.0255869	0.0143921	0.0218723	0.0154471	0.0172619	0.0355135	0.027523	0.023331
0.0180109	0.0196215	0.0167172	0.0182115	0.0199393	0.0122452	0.0190369	0.0166324	0.017052	0.0164954	0.0149356	0.017653	0.0184414	0.0215008	0.0184312	0.0143032	0.019064	0.013521	0.0237376	0.0126498	0.0179956	0.0126316	0.0227008	0.015693	0.0109593	0.0160404	0.0115015	0.106504	0.0127499	0.0184019	0.0149412	0.0184267	0.0161861	0.0216241	0.0113201	0.0117583	0.0183194	0.0140629	0.0183622	0.0230196	0.0127516	0.0151617	0.024638	0.0108313	0.0143944	0.0118106	0.0133468	0.0240965	0.0169716	0.0247377
0.0206131	0.0229455	0.0186037	0.0268674	0.0334811	0.0147091	0.0322666	0.0248335	0.0276076	0.0221018	0.0195696	0.0204451	0.0193384	0.0219353	0.0240893	0.0230753	0.0244791	0.0173617	0.0222145	0.0153236	0.0151392	0.0126153	0.01439	0.0147132	0.0148541	0.0205967	0.0138455	0.0210689	0.0120228	0.0430574	0.0183859	0.0209722	0.0185569	0.0338028	0.0118708	0.0125819	0.0245459	0.0227682	0.0235781	0.0300203	0.0119554	0.0230547	0.0212558	0.014884	0.0156638	0.0165654	0.0160887	0.0345391	0.0167909	0.0220737
0.0134129	0.0159171	0.0122421	0.0911855	0.0828123	0.0403009	0.0643637	0.0636601	0.0778497	0.0862574	0.0351843	0.0549057	0.0135047	0.0153539	0.0191183	0.0128367	0.0179155	0.0426372	0.0149811	0.0209739	0.011322	0.0109001	0.0128397	0.00983176	0.00861496	0.016904	0.0110636	0.0142189	0.0102368	0.0182722	0.0101997	0.0184008	0.011193	0.021005	0.00800875	0.0107998	0.0148291	0.0132049	0.0139481	0.0150002	0.012511	0.0160453	0.0126145	0.00863227	0.0501466	0.010284	0.0129823	0.0221183	0.0130534	0.0137388
0.0230854	0.0290102	0.0202723	0.0228459	0.0254944	0.0153613	0.0214931	0.0208649	0.0209263	0.0175441	0.0179716	0.025619	0.0262188	0.02143	0.0206442	0.0174829	0.022207	0.0148416	0.0388632	0.0158688	0.0159582	0.0148399	0.0248728	0.0143743	0.010693	0.0140476	0.0150295	0.0209578	0.0109961	0.0282147	0.0183528	0.0267934	0.020305	0.027127	0.0139641	0.0149963	0.0249796	0.0168745	0.0175066	0.0175973	0.0139652	0.0230241	0.0246297	0.0114422	0.0125484	0.0104853	0.014693	0.0309315	0.0164041	0.0378706
0.0193926	0.0188968	0.0162531	0.0247357	0.021102	0.0117386	0.0284959	0.0259694	0.0187682	0.0197343	0.013755	0.0198107	0.0152231	0.014912	0.022822	0.0181647	0.0264781	0.0125566	0.0212556	0.0131348	0.0170748	0.0130202	0.0154974	0.0137083	0.0134025	0.0173217	0.0187249	0.0174028	0.0144716	0.0243048	0.0174727	0.0262735	0.0178151	0.0212135	0.0112135	0.0116475	0.0236698	0.021535	0.0210187	0.0193982	0.0131438	0.0228357	0.0262703	0.0131763	0.0139635	0.0159992	0.0131911	0.0240546	0.0211295	0.0212282
0.0230845	0.0211385	0.0206292	0.024439	0.0262877	0.0151649	0.0261019	0.033412	0.0203308	0.0206505	0.0200607	0.0232552	0.0164355	0.0218073	0.0162459	0.0286628	0.0199154	0.0136146	0.0336505	0.0160354	0.0216962	0.0153951	0.0169418	0.105536	0.0133569	0.0182586	0.01577	0.0155438	0.0147501	0.0252313	0.0221933	0.026988	0.0210042	0.0244929	0.0162973	0.0166595	0.294319	0.0192819	0.0186309	0.0221925	0.0138762	0.218279	0.0221693	0.0130272	0.0183985	0.0129551	0.0168062	0.0391862	0.0194553	0.311589
0.023579	0.0196284	0.0195103	0.0244198	0.0230917	0.0177025	0.026661	0.0411699	0.0275153	0.021595	0.0187829	0.0155124	0.0176485	0.0222744	0.0331879	0.0359539	0.0330558	0.0142021	0.0281732	0.0193872	0.02303	0.0131976	0.0209266	0.090005	0.0130746	0.017802	0.0161078	0.0175479	0.0125551	0.0280626	0.0265922	0.0269795	0.0186205	0.0289678	0.0129472	0.0120761	0.291142	0.022692	0.0257162	0.0241791	0.0124726	0.206191	0.0204876	0.0141046	0.0164008	0.0132326	0.0190736	0.0345319	0.0194824	0.485029
0.0208388	0.0241925	0.0176344	0.025639	0.023166	0.0210233	0.0268359	0.0200301	0.0250617	0.0237277	0.0249918	0.0224055	0.0172425	0.0199124	0.0227249	0.0226846	0.0254638	0.0191454	0.0364603	0.0219726	0.0236542	0.0204772	0.0289339	0.0200654	0.0201434	0.0156724	0.0172337	0.0218857	0.0151878	0.104704	0.0183578	0.0343372	0.0232828	0.027048	0.0162834	0.0171956	0.0217687	0.0241865	0.0269414	0.0222475	0.0218363	0.0195136	0.0282417	0.0144869	0.0196528	0.0122844	0.0219414	0.0306312	0.0180094	0.0295527
0.0264844	0.0209658	0.0199336	0.0231855	0.0219467	0.0128456	0.0252584	0.0301888	0.0188058	0.023323	0.0194283	0.0184604	0.0211898	0.0187732	0.0269722	0.0209908	0.0265697	0.0189622	0.0198874	0.0186281	0.018969	0.0169527	0.0198107	0.0126369	0.0131998	0.0181095	0.0162079	0.0271646	0.0181398	0.0244691	0.0251041	0.0245142	0.0187989	0.0324091	0.0166886	0.0183542	0.0336726	0.0226674	0.0200639	0.0247973	0.0126379	0.0207603	0.0230353	0.0175499	0.0171374	0.0137087	0.0173615	0.0255131	0.0177336	0.0283609
0.0200062	0.026855	0.0130092	0.0211642	0.0158769	0.0100917	0.026498	0.0163564	0.0163286	0.0135842	0.0150375	0.0161616	0.0127262	0.0173847	0.0165273	0.0222934	0.0183942	0.0134006	0.0148866	0.0140878	0.0188602	0.0158972	0.0134168	0.0111917	0.00983358	0.0138645	0.0132989	0.0152435	0.00895069	0.0147705	0.0142596	0.0158644	0.0129862	0.0211209	0.00997268	0.0108766	0.0154371	0.0193914	0.0181177	0.0180615	0.00873734	0.0186294	0.0183139	0.00987684	0.0137557	0.00928428	0.0143977	0.0207346	0.0132357	0.01773
0.0197217	0.0190606	0.0165601	0.0199075	0.017769	0.0141264	0.0210953	0.0187036	0.0224061	0.0166173	0.0168884	0.0244087	0.0120755	0.0198795	0.0185674	0.0210591	0.0237774	0.0117055	0.0174282	0.0115411	0.0150029	0.0139368	0.0150527	0.0110412	0.0124714	0.0146345	0.0132762	0.0213379	0.0124427	0.0284248	0.0150516	0.0185629	0.0157233	0.0288874	0.0106435	0.0140168	0.0204607	0.0147828	0.0162782	0.0224651	0.0122341	0.0184892	0.0170638	0.0112942	0.0140093	0.012264	0.0170126	0.021452	0.0131731	0.0185848
0.0349192	0.0173227	0.0140448	0.116067	0.111886	0.134787	0.0778768	0.112488	0.0840881	0.0844716	0.0558457	0.0818726	0.0125139	0.0157034	0.0178671	0.0184872	0.0264007	0.124518	0.0253512	0.0127254	0.0177456	0.0108844	0.0133707	0.012798	0.0112141	0.0152561	0.0171888	0.0164843	0.00946286	0.0206136	0.0144839	0.0227344	0.017652	0.0200509	0.0122539	0.0110185	0.0185308	0.0162997	0.0174442	0.0247558	0.011184	0.0170183	0.0156739	0.0101314	0.056525	0.0114492	0.0145226	0.0222726	0.0132157	0.0170709
0.0188742	0.0311136	0.0197928	0.0294922	0.0194569	0.0157842	0.0222173	0.024043	0.0249231	0.0241094	0.0177866	0.0259064	0.022614	0.0224177	0.0279736	0.0186095	0.0253352	0.0147401	0.0209255	0.0181663	0.0212539	0.0124629	0.0167679	0.0142195	0.0121002	0.0176606	0.0127664	0.0196792	0.0141521	0.0217875	0.0205331	0.0212502	0.0164996	0.0202753	0.0129241	0.0154132	0.0227339	0.0139613	0.0181688	0.0168821	0.0133516	0.0192333	0.0209992	0.0149453	0.0179506	0.0142909	0.0196953	0.0248806	0.0194116	0.022339
0.0178982	0.014808	0.0122557	0.0170442	0.0155439	0.0105614	0.0160908	0.016347	0.0137481	0.0185572	0.0120932	0.0161212	0.0116641	0.0127016	0.0161807	0.0158159	0.0250553	0.0105685	0.0201266	0.0119396	0.0173943	0.0112405	0.0158617	0.0120312	0.0110277	0.0135737	0.0126066	0.0162104	0.0104812	0.016577	0.014229	0.0169766	0.0149576	0.0259488	0.00846174	0.00878928	0.0178613	0.0152933	0.0161541	0.0133396	0.0101253	0.016174	0.0152736	0.0116364	0.0132568	0.0108135	0.013156	0.0193331	0.0131981	0.0202512
0.0376339	0.0255704	0.0228129	0.0331054	0.0273008	0.0182804	0.0203309	0.0358012	0.0217741	0.0331907	0.0222444	0.0203316	0.0196949	0.0241156	0.0216759	0.028723	0.0387806	0.0188022	0.0307938	0.0148691	0.0198815	0.0196286	0.019436	0.025716	0.0213133	0.0344769	0.0221782	0.0228336	0.0170206	0.0262037	0.0249324	0.0320534	0.0236657	0.0276124	0.0235075	0.0167434	0.03119	0.0223105	0.0215714	0.0268891	0.0212561	0.0411908	0.0280944	0.0162351	0.0191075	0.018435	0.0218174	0.0418933	0.0237707	0.0335837
0.0316059	0.0299155	0.0233558	0.0270676	0.0297622	0.0156363	0.0295518	0.0252187	0.0276215	0.0267198	0.0264975	0.0317022	0.0229019	0.0242324	0.0306553	0.02505	0.0288892	0.0177097	0.0249824	0.0155612	0.0327518	0.0189861	0.0173967	0.0212675	0.0144922	0.0253701	0.0226899	0.0189875	0.0163904	0.0222181	0.0217442	0.0260042	0.0161527	0.0525414	0.0158155	0.0164277	0.0309109	0.0185084	0.0216634	0.022334	0.016967	0.0353042	0.0262946	0.014749	0.0204515	0.0126929	0.0224102	0.039146	0.0181397	0.0247331
0.0133252	0.00934625	0.00896965	0.00980114	0.0104046	0.00699406	0.0113816	0.00978392	0.0187532	0.0128636	0.00925202	0.0116208	0.0079158	0.00785642	0.0108984	0.0123127	0.0110638	0.00748144	0.0099918	0.00603718	0.00970311	0.00654696	0.0111009	0.00652988	0.00644025	0.00779457	0.00683235	0.0137202	0.00668826	0.0116602	0.0104503	0.00924489	0.0107672	0.0101612	0.00511937	0.00630894	0.00989036	0.00899832	0.0104716	0.011083	0.00614372	0.00954182	0.0116852	0.00637959	0.00964952	0.00635094	0.00789199	0.0126284	0.0090848	0.0144622
0.0201146	0.0131788	0.0117576	0.0138631	0.0168848	0.0101463	0.0181625	0.0180968	0.0210842	0.0164483	0.0153793	0.0155593	0.0157898	0.0121588	0.0147948	0.0195138	0.02082	0.0145358	0.0177163	0.0140131	0.0185011	0.0110361	0.015553	0.0132538	0.0107985	0.0130492	0.0140683	0.0120419	0.00968609	0.0221335	0.0202744	0.018441	0.0159093	0.01725	0.0095194	0.00970809	0.0197285	0.0159859	0.0212248	0.0171581	0.012255	0.0204974	0.0183644	0.00923907	0.0141003	0.010168	0.0132435	0.0241619	0.0145484	0.0203859
0.0150573	0.0143534	0.0128111	0.0197602	0.0182723	0.0125487	0.0149601	0.0135815	0.0154953	0.0203857	0.014525	0.0176519	0.0115629	0.0152664	0.0140329	0.0183963	0.017835	0.0107739	0.016145	0.0103758	0.0124506	0.00938679	0.0156149	0.0112453	0.0103498	0.013663	0.0124199	0.0157126	0.0104925	0.0174355	0.015874	0.0147047	0.0154648	0.019257	0.0113565	0.00983008	0.0173129	0.0145681	0.0202634	0.0162377	0.0101528	0.0166781	0.0189885	0.0106437	0.0191727	0.0089624	0.0122967	0.0224874	0.0183752	0.0150726
0.0130923	0.0119825	0.013763	0.0176681	0.01661	0.00825515	0.0170713	0.0149915	0.0219736	0.0204387	0.0157516	0.0121003	0.016584	0.014549	0.0110054	0.0197885	0.0186271	0.00979372	0.0128417	0.00798082	0.0127327	0.0108184	0.0120106	0.0107902	0.00987091	0.01173	0.0127468	0.0145099	0.0104463	0.0186462	0.0137202	0.0149583	0.0107631	0.0228639	0.00888956	0.00938258	0.0154352	0.0130105	0.0131172	0.0155805	0.0104597	0.0160704	0.0181387	0.00765367	0.0113099	0.00925173	0.010764	0.019164	0.0112061	0.0152945
0.0106328	0.00840507	0.00996232	0.0121009	0.0121486	0.0106375	0.0106841	0.0110293	0.0122479	0.0107119	0.00827751	0.0109665	0.00834668	0.00919817	0.0111724	0.0104575	0.0143808	0.00755401	0.0100154	0.0120989	0.00968962	0.00671536	0.00923406	0.00845566	0.00780779	0.00849281	0.00780848	0.0124224	0.0073035	0.00999459	0.00817131	0.0104251	0.00824165	0.0119149	0.00759995	0.00674105	0.010094	0.0114846	0.00914195	0.0113956	0.00925262	0.00993222	0.0125452	0.0062784	0.00662543	0.00526333	0.00825993	0.0131889	0.00843699	0.0142328
0.0256091	0.0219208	0.0237697	0.0225888	0.0196277	0.0185344	0.0216543	0.0208992	0.0295166	0.0275333	0.0212365	0.0177178	0.0179178	0.0238708	0.0233989	0.0229446	0.0283972	0.0132173	0.026887	0.017647	0.0238227	0.0125438	0.0167517	0.0191258	0.0135627	0.0180737	0.0146501	0.022906	0.0121802	0.0296538	0.0208018	0.024414	0.0184938	0.0287415	0.0147544	0.014211	0.0254816	0.0186915	0.0261087	0.0301738	0.0244625	0.0209906	0.0290109	0.0156709	0.016998	0.0131762	0.0189774	0.0350589	0.0189886	0.0274236
0.0144033	0.0160401	0.0113882	0.0171047	0.015046	0.0163068	0.0152509	0.0154937	0.0142426	0.0143639	0.0139537	0.0155627	0.0120603	0.0139647	0.0169504	0.0176886	0.0178106	0.0103623	0.015787	0.0202915	0.0175009	0.0109816	0.0126847	0.0114032	0.0111157	0.0126178	0.0117527	0.0175591	0.00977125	0.0157116	0.0124685	0.0157481	0.011814	0.0176771	0.00987082	0.00961209	0.0192079	0.0117459	0.0180127	0.0138194	0.015057	0.0153297	0.0336731	0.00916496	0.0123654	0.00980341	0.0138053	0.0233631	0.0188775	0.0188514
0.0264336	0.0163139	0.0230263	0.017139	0.020085	0.0149431	0.0230452	0.0189098	0.0189855	0.0221224	0.0145467	0.0185335	0.0146682	0.0181702	0.0180059	0.0243329	0.0258888	0.0179517	0.0224791	0.0144465	0.0162518	0.0121359	0.0207376	0.0179767	0.0132291	0.0169096	0.0136666	0.0166682	0.0157684	0.0252278	0.0206524	0.0185239	0.0154762	0.0350198	0.0112001	0.0118618	0.0394026	0.0188601	0.0196637	0.0196774	0.0160208	0.0204347	0.0206128	0.0108381	0.0139152	0.0120555	0.0183891	0.0254392	0.0171641	0.021962
0.0194584	0.0230606	0.0157178	0.0291451	0.0278118	0.011407	0.0245468	0.0213009	0.0248953	0.0250459	0.0159669	0.0204564	0.0165132	0.0197802	0.0203354	0.0275857	0.0262157	0.0156071	0.0221564	0.02212	0.0175031	0.0150811	0.0146665	0.0180671	0.0155379	0.0158538	0.0193105	0.0232409	0.0128439	0.157638	0.0171418	0.0253126	0.0163054	0.030939	0.0134309	0.0155301	0.0192568	0.0209419	0.0212106	0.0198076	0.0135932	0.0230442	0.0253368	0.0140377	0.0203172	0.0112266	0.0168294	0.0383871	0.0224219	0.023653
0.0203913	0.0232952	0.013893	0.0253321	0.0259184	0.0140063	0.02236	0.0175728	0.0234134	0.0202649	0.0172254	0.0195609	0.0194128	0.0182764	0.0211526	0.0219448	0.0216273	0.0138119	0.021845	0.0140169	0.0189091	0.0122194	0.0152836	0.0182171	0.0141677	0.0171033	0.0146032	0.0191732	0.0114789	0.0856413	0.0172458	0.0218104	0.0163341	0.0276075	0.0108711	0.0141149	0.0251535	0.0172766	0.0187191	0.0203263	0.0134569	0.0238741	0.0234617	0.0122125	0.0151391	0.0157045	0.0147893	0.0279428	0.0157229	0.0236945
0.0185562	0.0196646	0.0246717	0.0246461	0.021042	0.0194594	0.0242172	0.0246028	0.0277394	0.0161003	0.0182473	0.0233115	0.0218497	0.019836	0.0205241	0.0224126	0.0300032	0.0168631	0.0255908	0.0193485	0.0154784	0.0160039	0.0215027	0.0136693	0.0134151	0.0158532	0.0194247	0.0234404	0.0173921	0.129033	0.0205754	0.0250706	0.0191055	0.0216926	0.0148241	0.012465	0.0203641	0.0209704	0.0174047	0.0233265	0.013884	0.0228902	0.0273671	0.0158785	0.013084	0.01473	0.0231003	0.0244615	0.0183906	0.0251002
0.0166196	0.016914	0.0127541	0.0174147	0.0156379	0.00986278	0.0152104	0.0196376	0.0160434	0.0167135	0.0129382	0.0138281	0.0138137	0.0134824	0.0172576	0.014041	0.0215334	0.0101984	0.0147337	0.013508	0.0131699	0.0108469	0.0131538	0.0145124	0.00996586	0.0141059	0.00937315	0.013408	0.0109432	0.0929153	0.0139898	0.0174277	0.011547	0.017215	0.00910756	0.00897078	0.0139212	0.0150121	0.0137544	0.0206558	0.00993914	0.0192604	0.0156999	0.00996369	0.00994976	0.0114934	0.0113351	0.0214545	0.0164409	0.0143075
0.0143396	0.0121686	0.00985218	0.0132122	0.011622	0.00835565	0.012261	0.0153871	0.0110014	0.0110951	0.0128954	0.0124582	0.0116446	0.0120886	0.0114304	0.0111158	0.0163369	0.0100051	0.0205779	0.00949464	0.0103835	0.00708984	0.0110682	0.0102238	0.00743273	0.012804	0.00907812	0.0154469	0.00767339	0.0149765	0.0141517	0.017453	0.0105855	0.0148417	0.00857757	0.00668219	0.0155911	0.0127407	0.0136817	0.0131728	0.00843525	0.0113372	0.0126404	0.00851913	0.0101676	0.00860504	0.00963164	0.0180463	0.00966243	0.0150908
0.0240292	0.0189522	0.0249243	0.0225709	0.0215383	0.0137645	0.0221781	0.026957	0.0242924	0.0171583	0.0149017	0.0180024	0.0134277	0.0193012	0.0198566	0.0160224	0.0169972	0.0109878	0.0242731	0.0193648	0.0142004	0.0145991	0.0146461	0.0139917	0.0128775	0.0169998	0.0152039	0.0170675	0.01119	0.0212683	0.0178081	0.018296	0.0153333	0.025427	0.0115788	0.0103962	0.0215411	0.013038	0.0183361	0.0172103	0.0126324	0.0190912	0.0172189	0.0140338	0.0116738	0.0107732	0.0152998	0.0273965	0.017943	0.0213705
0.022253	0.0356152	0.0149217	0.0199047	0.0180212	0.0138154	0.0241358	0.0236745	0.020258	0.0211644	0.0153248	0.0174026	0.0141091	0.0144861	0.0151086	0.0212447	0.0248052	0.0113145	0.0290227	0.011478	0.0230597	0.0107379	0.0160174	0.0133404	0.0124218	0.0165393	0.0123089	0.0169554	0.0106692	0.0205597	0.0170107	0.0311253	0.0167431	0.0241483	0.0111353	0.0115663	0.0178462	0.0173751	0.0148513	0.0169042	0.0137158	0.0174434	0.0180927	0.0157844	0.0157327	0.00953255	0.0184578	0.0281742	0.0158126	0.0252045
0.0254834	0.0154484	0.0109194	0.0181686	0.0217365	0.0089843	0.0141221	0.0162418	0.0129713	0.011795	0.0117324	0.0130809	0.0135513	0.0125736	0.0142809	0.0120632	0.0212831	0.0107932	0.0143599	0.00835168	0.0130282	0.00912068	0.014077	0.0115055	0.00866394	0.0160972	0.0120738	0.0129445	0.00975935	0.0145955	0.012417	0.0167058	0.0131481	0.0154624	0.00977077	0.00836605	0.0175587	0.0132649	0.0177338	0.014348	0.00864071	0.0128445	0.0167038	0.00811208	0.0107567	0.00750255	0.0121999	0.0231385	0.0103197	0.0173124
0.0124144	0.0117384	0.00983422	0.0528517	0.0562015	0.0635669	0.0457822	0.0469739	0.0498971	0.0441923	0.0342816	0.0381014	0.0134227	0.00863382	0.0108294	0.0122866	0.0146633	0.105281	0.0125159	0.0109944	0.00983757	0.00743675	0.0099705	0.0128156	0.00837747	0.0123118	0.00788408	0.00963751	0.00786583	0.0124766	0.011173	0.013529	0.0107206	0.012374	0.00665928	0.00750323	0.0140566	0.0115221	0.0123032	0.0114043	0.00702305	0.0121733	0.0119758	0.00727546	0.0347372	0.00652208	0.0102659	0.013745	0.00898795	0.0125416
0.0261397	0.0292401	0.018601	0.0211652	0.0273449	0.0137849	0.0248408	0.0234756	0.0292478	0.0244843	0.0235868	0.0294109	0.0275147	0.0196633	0.0274663	0.0317186	0.028237	0.0198743	0.0323543	0.0188313	0.0193016	0.017949	0.0226719	0.0151181	0.0160127	0.0202052	0.0189055	0.0176535	0.0132999	0.0335055	0.0259763	0.0349486	0.0241205	0.0342368	0.0154584	0.0160568	0.0314216	0.016699	0.0245177	0.0316532	0.01382	0.0230048	0.0216122	0.017011	0.0262828	0.0162661	0.0235574	0.0340109	0.0211073	0.0260833
0.0170871	0.0196039	0.0183947	0.0203786	0.0188794	0.0119343	0.0242844	0.017313	0.0203255	0.019662	0.0208059	0.0162677	0.0158208	0.0177973	0.0191513	0.0217506	0.017777	0.0132387	0.0256619	0.0152233	0.0187482	0.0197436	0.0144695	0.0181179	0.0122634	0.0155785	0.0144789	0.0173591	0.014267	0.0265403	0.0198539	0.0224939	0.0145544	0.0384	0.0101337	0.0166661	0.0285208	0.0153942	0.0238348	0.0265638	0.0122305	0.021877	0.0245544	0.0138212	0.0150153	0.00914956	0.0161542	0.0238286	0.0140098	0.0182978
0.0303818	0.0248241	0.0267896	0.0307204	0.025873	0.0189901	0.0327548	0.0221842	0.0275138	0.0477871	0.021081	0.0245232	0.0207387	0.0233512	0.0266493	0.0340259	0.0321582	0.0235209	0.0291832	0.0189227	0.0209352	0.0162344	0.0193889	0.017648	0.0140363	0.0178684	0.0157637	0.0301944	0.0174746	0.0262128	0.0241535	0.0247254	0.022428	0.034098	0.0143216	0.019504	0.0288869	0.0185651	0.030355	0.0248761	0.0153644	0.0302869	0.0259756	0.0179503	0.0176966	0.0168578	0.0220547	0.0330852	0.0244048	0.0452654
0.028299	0.0203588	0.0213221	0.025809	0.0211931	0.0142747	0.0237412	0.023571	0.0262671	0.0233768	0.0220304	0.0210931	0.0174231	0.023792	0.0195902	0.0244281	0.0218709	0.0164671	0.0250878	0.0186034	0.019347	0.013639	0.019547	0.0794277	0.0161065	0.0180141	0.0220725	0.0202937	0.0183511	0.0295559	0.0216154	0.0261139	0.0200712	0.026648	0.0131015	0.0136086	0.266955	0.0216626	0.0202976	0.0270158	0.0152028	0.174156	0.0272785	0.0142727	0.0155589	0.0144202	0.0162127	0.0365315	0.0205031	0.193114
0.017224	0.0205514	0.0136184	0.0953277	0.0924617	0.031535	0.0905673	0.100832	0.084857	0.0744916	0.0605872	0.0648544	0.0127695	0.0122367	0.0152828	0.0197185	0.0166395	0.040961	0.0268759	0.0104994	0.0136488	0.00963678	0.018961	0.0119724	0.0087625	0.0133136	0.0103455	0.0296496	0.0126585	0.0156571	0.0136931	0.0221755	0.0167176	0.0183817	0.00783851	0.00862086	0.0178435	0.0176823	0.015856	0.0158225	0.00972832	0.0172267	0.0169349	0.0102167	0.494488	0.00843719	0.0139793	0.0205429	0.0156388	0.0177613
0.0167046	0.0172486	0.0195069	0.0207702	0.015101	0.011235	0.0199923	0.0203106	0.0235202	0.0176527	0.018006	0.0170395	0.0231999	0.0170767	0.0187225	0.0164493	0.0263169	0.0129424	0.027288	0.0138382	0.0196861	0.0116249	0.0135169	0.0144423	0.0117668	0.0165541	0.0183488	0.0179496	0.0146015	0.0223674	0.0156638	0.0196997	0.0158095	0.0236556	0.0113516	0.0120054	0.0165551	0.0204005	0.0152663	0.0196736	0.0115139	0.017459	0.0223202	0.0112252	0.0141454	0.0109325	0.0137067	0.0226821	0.0164354	0.0192642
0.024463	0.0204639	0.0193	0.0326299	0.0302071	0.0118032	0.0263736	0.0225906	0.0266851	0.0189952	0.0161461	0.0202158	0.0237953	0.0180019	0.0183284	0.0239102	0.0246603	0.016643	0.021312	0.0181539	0.0176995	0.014161	0.0234175	0.0179315	0.0148853	0.0189091	0.024409	0.0190444	0.0140703	0.0238833	0.0190252	0.0273031	0.019629	0.044056	0.0125566	0.0135749	0.0259639	0.0244987	0.0234438	0.0210069	0.0140206	0.0227608	0.0245753	0.0129048	0.0172314	0.0148076	0.0221976	0.0334899	0.0211619	0.0210709
0.0163619	0.0185466	0.0124193	0.0215896	0.0238576	0.0122884	0.0194461	0.0186781	0.0165236	0.0146522	0.0141528	0.0170361	0.0145565	0.0153167	0.0161989	0.0153258	0.0223401	0.013537	0.0175601	0.0164015	0.0129657	0.0111715	0.0149433	0.0141104	0.013758	0.016582	0.0129058	0.0166223	0.010545	0.0216456	0.0130077	0.0175006	0.0152993	0.0248829	0.0115635	0.0100092	0.0199706	0.0147627	0.0143235	0.0230469	0.00939804	0.0166733	0.0200198	0.0125288	0.0138203	0.00995535	0.0121413	0.0187341	0.0142102	0.019468
0.0176721	0.0182746	0.015929	0.0209866	0.0199991	0.0138667	0.0194758	0.0201738	0.0171031	0.0165448	0.0177319	0.0197889	0.0154139	0.0147707	0.0194768	0.0147139	0.0200316	0.0131377	0.015738	0.0122089	0.0186719	0.00965289	0.0141224	0.0137413	0.0128242	0.0197311	0.0132183	0.0188511	0.0109898	0.028711	0.0162348	0.0151216	0.0173942	0.0273469	0.0102186	0.00982795	0.0223687	0.0159448	0.0184173	0.0266962	0.0101506	0.0200093	0.022009	0.0114355	0.0151717	0.0105703	0.0128404	0.0219205	0.0119994	0.0180832
0.0132471	0.00894301	0.008269	0.0595689	0.0557627	0.0658841	0.0596623	0.050051	0.0616093	0.0400159	0.0340139	0.0398585	0.0120408	0.00874123	0.0107448	0.0111022	0.0172431	0.102703	0.0162392	0.00949187	0.00920826	0.00773572	0.0124511	0.0104977	0.00674601	0.00988035	0.00995593	0.0104476	0.00780441	0.0133501	0.0103467	0.0144176	0.0123525	0.0159047	0.00716722	0.00814258	0.0144196	0.00961752	0.0119892	0.0115288	0.0078092	0.0123151	0.0125678	0.00721865	0.0340315	0.00711827	0.0103474	0.0192923	0.00974349	0.013688
0.0117445	0.0156578	0.00903963	0.063569	0.0657244	0.0661338	0.0580345	0.0504344	0.0599079	0.0364396	0.0347058	0.0428017	0.0120416	0.0100968	0.0110813	0.0143684	0.0155601	0.0938919	0.0157626	0.00964301	0.0110161	0.00822344	0.00914701	0.010369	0.00795116	0.0155625	0.00924093	0.0098617	0.00792686	0.0190251	0.0112423	0.018971	0.0107931	0.014964	0.00623671	0.00755781	0.0153588	0.00917011	0.0121398	0.0123301	0.00966449	0.011968	0.013197	0.00697941	0.0359933	0.00800856	0.0101712	0.0126926	0.00919703	0.0143733
0.0219428	0.0155844	0.0173494	0.0889289	0.0845927	0.105063	0.0843332	0.0805147	0.0827686	0.0832566	0.0498907	0.0714349	0.0120301	0.0157202	0.0149317	0.0185959	0.0209962	0.114827	0.0168212	0.0138005	0.0176641	0.00820443	0.016615	0.0135167	0.0104711	0.0191149	0.0102313	0.0143306	0.0113417	0.0160058	0.01606	0.0186269	0.0120844	0.0167269	0.00939858	0.00976237	0.017359	0.0155012	0.0153542	0.015038	0.00918262	0.0195209	0.0174651	0.0104802	0.053389	0.00888989	0.0130842	0.0299097	0.0133647	0.0216326
0.0221898	0.0183299	0.0173086	0.0198482	0.01797	0.0135609	0.017428	0.0202349	0.0177764	0.0160236	0.0142847	0.0158442	0.0194287	0.015408	0.0193702	0.0195856	0.0277029	0.0154269	0.0223629	0.0140467	0.0229943	0.0133297	0.0194169	0.0124881	0.015262	0.0161625	0.0154077	0.0172324	0.0121587	0.0231754	0.0169624	0.0264726	0.0195307	0.0245921	0.0111037	0.0115335	0.0195317	0.0186586	0.0172107	0.0172482	0.0110298	0.0243514	0.0209783	0.0128402	0.0148903	0.0118819	0.0148431	0.0256513	0.0163742	0.0205633
[truncated: 367 more rows]
[truncated: 614 more columns]
