# Supplementary material for: Prediction of drug–target interaction by label propagation with mutual interaction information derived from heterogeneous network
Source: Royal Society of Chemistry journal article supplement (doi:10.1039/c5mb00615e), 2015-12-01
Supplement: c5mb00615e5.xlsx [file c5mb00615e5.xlsx]

## Sheet: DT network
Table S11 ion channels (ICs) dataset drug-target interaction network
	D00035	D00110	D00136	D00195	D00219	D00225	D00227	D00228	D00234	D00252	D00274	D00283	D00293	D00294	D00303	D00319	D00326	D00329	D00331	D00332	D00335	D00336	D00338	D00340	D00345	D00349	D00351	D00354	D00358	D00364	D00367	D00373	D00379	D00380	D00392	D00394	D00418	D00437	D00438	D00451	D00456	D00464	D00474	D00477	D00480	D00495	D00499	D00504	D00512
hsa:10008	0	0	0	0	0	0	0	0	0	0	0	0	0	1	0	0	0	0	0	0	0	0	0	0	0	0	0	0	0	0	0	0	0	0	0	0	0	0	0	0	0	0	0	0	0	0	0	0	0
hsa:10060	0	0	0	0	0	0	0	0	0	0	0	0	0	0	0	0	0	0	0	0	0	0	0	0	0	0	0	0	0	0	0	0	0	0	0	0	0	0	0	0	0	0	0	0	0	0	0	0	0
hsa:10369	0	0	0	0	0	0	0	0	0	0	0	0	0	0	0	0	0	0	0	1	0	0	0	0	0	0	0	0	0	0	0	0	0	0	0	0	0	1	0	0	0	0	0	0	0	0	0	0	1
hsa:1080	0	0	0	0	0	0	1	0	0	0	0	0	0	0	0	0	0	0	0	0	0	1	0	0	0	0	0	0	0	0	0	0	0	0	0	0	0	0	0	0	0	0	0	0	0	0	0	0	0
hsa:11254	1	0	0	0	0	0	0	0	0	0	0	0	0	0	0	0	0	0	0	0	0	0	0	0	0	0	0	0	0	0	0	0	0	0	0	0	0	0	0	0	0	0	0	0	0	0	0	0	0
hsa:11280	0	1	0	0	0	0	0	0	0	0	0	0	0	0	0	0	0	0	0	0	0	0	0	0	0	0	0	0	0	0	0	0	0	0	0	0	0	0	0	0	0	0	0	0	0	0	0	0	0
hsa:1134	0	0	0	1	0	0	0	0	0	0	0	0	0	0	0	0	0	0	0	0	0	0	0	0	0	0	0	0	0	0	0	0	0	0	0	0	0	0	0	0	0	0	0	0	0	0	0	0	0
hsa:1135	0	0	0	1	0	0	0	0	0	0	0	0	0	0	0	0	0	0	0	0	0	0	0	0	0	0	0	0	0	0	0	0	0	0	0	0	0	0	0	0	0	0	0	0	0	0	1	0	0
hsa:1136	0	0	0	1	0	0	0	0	0	0	0	0	0	0	0	0	0	0	0	0	0	0	0	0	0	0	0	0	0	0	0	0	0	0	0	0	0	0	0	0	0	0	0	0	0	0	1	0	0
hsa:1137	0	0	0	1	0	0	0	0	0	0	0	0	0	0	0	0	0	0	0	0	0	0	0	0	0	0	0	0	0	0	0	0	0	0	0	0	0	0	0	0	0	0	0	0	0	0	1	0	0
hsa:1138	0	0	0	1	0	0	0	0	0	0	0	0	0	0	0	0	0	0	0	0	0	0	0	0	0	0	0	0	0	0	0	0	0	0	0	0	0	0	0	0	0	0	0	0	0	0	0	0	0
hsa:1139	0	0	0	1	0	0	0	0	0	0	0	0	0	0	0	0	0	0	0	0	0	0	0	0	0	0	0	0	0	0	0	0	0	0	0	0	0	0	0	0	0	0	0	0	0	0	0	0	0
hsa:1140	0	0	0	0	0	0	0	0	0	0	0	0	0	0	0	0	0	0	0	0	0	0	0	0	0	0	0	0	0	0	0	0	0	0	0	0	0	0	0	0	0	0	0	0	0	0	0	0	0
hsa:1141	0	0	0	0	0	0	0	0	0	0	0	0	0	0	0	0	0	0	0	0	0	0	0	0	0	0	0	0	0	0	0	0	0	0	0	0	0	0	0	0	0	0	0	0	0	0	1	0	0
hsa:1144	0	0	0	0	0	0	0	0	0	0	0	0	0	0	0	0	0	0	0	0	0	0	0	0	0	0	0	0	0	0	0	0	0	0	0	0	0	0	0	0	0	0	0	0	0	0	0	0	0
hsa:1145	0	0	0	0	0	0	0	0	0	0	0	0	0	0	0	0	0	0	0	0	0	0	0	0	0	0	0	0	0	0	0	0	0	0	0	0	0	0	0	0	0	0	0	0	0	0	1	0	0
hsa:116443	0	0	0	0	0	0	0	0	0	0	0	0	0	0	0	0	0	0	0	1	0	0	0	0	0	0	0	0	0	0	0	0	0	0	0	0	0	0	0	0	0	0	0	0	0	0	0	0	0
hsa:116444	0	0	1	0	0	0	0	0	0	0	0	0	0	0	0	0	0	0	0	0	0	0	0	0	0	0	0	0	0	0	0	0	0	0	0	0	0	0	0	0	0	0	0	0	0	0	0	0	0
hsa:1181	0	0	0	0	0	0	0	0	0	0	0	0	0	0	0	0	0	0	0	0	0	0	0	0	0	0	0	0	0	0	0	0	0	0	0	0	0	0	0	0	0	0	0	0	0	0	0	0	0
hsa:169522	0	0	0	0	0	0	0	0	0	0	0	0	0	1	0	0	0	0	0	0	0	0	0	0	0	0	0	0	0	0	0	0	0	0	0	0	0	0	0	0	0	0	0	0	0	0	0	0	0
hsa:170572	0	0	0	0	0	0	0	0	0	0	0	0	0	0	0	0	0	0	0	0	0	0	0	0	0	0	0	0	0	0	0	0	0	0	0	0	0	0	0	0	0	0	0	0	0	0	0	0	0
hsa:200909	0	0	0	0	0	0	0	0	0	0	0	0	0	0	0	0	0	0	0	0	0	0	0	0	0	0	0	0	0	0	0	0	0	0	0	0	0	0	0	0	0	0	0	0	0	0	0	0	0
hsa:22953	0	0	0	0	0	0	0	0	0	0	0	0	0	0	0	0	0	0	0	0	0	0	0	0	0	0	0	0	0	0	0	0	0	0	0	0	0	0	0	0	0	0	0	0	0	0	0	0	0
hsa:23630	0	0	0	0	0	0	0	0	0	0	0	0	0	1	0	0	0	0	0	0	0	0	0	0	0	0	0	0	0	0	0	0	0	0	0	0	0	0	0	0	0	0	0	0	0	0	0	0	0
hsa:23704	0	0	0	0	0	0	0	0	0	0	0	0	0	1	0	0	0	0	0	0	0	0	0	0	0	0	0	0	0	0	0	0	0	0	0	0	0	0	0	0	0	0	0	0	0	0	0	0	0
hsa:2554	0	0	0	0	0	1	0	0	0	0	0	0	1	0	0	0	0	1	1	0	0	0	1	0	0	0	0	0	0	0	0	0	0	0	0	0	0	0	0	0	0	1	1	0	0	0	1	0	0
hsa:2555	0	0	0	0	0	1	0	0	0	0	0	0	1	0	0	0	0	1	1	0	0	0	0	0	0	0	0	0	0	0	0	0	0	0	0	0	0	0	0	0	0	0	0	0	0	0	1	0	0
hsa:2556	0	0	0	0	0	1	0	0	0	0	0	0	1	0	0	0	0	1	1	0	0	0	0	0	0	0	0	0	0	0	0	0	0	0	0	0	0	0	0	0	0	0	0	0	0	0	1	0	0
hsa:2557	0	0	0	0	0	1	0	0	0	0	0	0	1	0	0	0	0	1	1	0	0	0	0	0	0	0	0	0	0	0	0	0	0	0	0	0	0	0	0	0	0	0	0	0	0	0	1	0	0
hsa:2558	0	0	0	0	0	1	0	0	0	0	0	0	1	0	0	0	0	1	1	0	0	0	0	0	0	0	0	0	0	0	0	0	0	0	0	0	0	0	0	0	0	0	0	0	0	0	1	0	0
hsa:2559	0	0	0	0	0	1	0	0	0	0	0	0	1	0	0	0	0	1	1	0	0	0	0	0	0	0	0	0	0	0	0	0	0	0	0	0	0	0	0	0	0	0	0	0	0	0	1	0	0
hsa:2560	0	0	0	0	0	1	0	0	0	0	0	0	1	0	0	0	0	1	0	0	0	0	0	0	0	0	0	0	0	0	0	0	0	0	0	0	0	0	0	0	0	0	0	0	0	0	1	0	0
hsa:2561	0	0	0	0	0	1	0	0	0	0	0	0	1	0	0	0	0	1	0	0	0	0	0	0	0	0	0	0	0	0	0	0	0	0	0	0	0	0	0	0	0	0	0	0	0	0	1	0	0
hsa:2562	0	0	0	0	0	1	0	0	0	0	0	0	1	0	0	0	0	1	0	0	0	0	0	0	0	0	0	0	0	0	0	0	0	0	0	0	0	0	0	0	0	0	0	0	0	0	1	0	0
hsa:2563	0	0	0	0	0	1	0	0	0	0	0	0	1	0	0	0	0	1	0	0	0	0	0	0	0	0	0	0	0	0	0	0	0	0	0	0	0	0	0	0	0	0	0	0	0	0	1	0	0
hsa:2564	0	0	0	0	0	1	0	0	0	0	0	0	1	0	0	0	0	1	0	0	0	0	0	0	0	0	0	0	0	0	0	0	0	0	0	0	0	0	0	0	0	0	0	0	0	0	1	0	0
hsa:2566	0	0	0	0	0	1	0	0	0	0	0	0	1	0	0	0	0	1	0	0	0	0	0	0	0	0	0	0	0	0	0	0	0	0	0	0	0	0	0	0	0	0	0	0	0	0	1	0	0
hsa:2567	0	0	0	0	0	1	0	0	0	0	0	0	1	0	0	0	0	1	0	0	0	0	0	0	0	0	0	0	0	0	0	0	0	0	0	0	0	0	0	0	0	0	0	0	0	0	1	0	0
hsa:2569	0	0	0	0	0	1	0	0	0	0	0	0	1	0	0	0	0	1	0	0	0	0	0	0	0	0	0	0	0	0	0	0	0	0	0	0	0	0	0	0	0	0	0	0	0	0	1	0	0
hsa:2570	0	0	0	0	0	0	0	0	0	0	0	0	1	0	0	0	0	0	0	0	0	0	0	0	0	0	0	0	0	0	0	0	0	0	0	0	0	0	0	0	0	0	0	0	0	0	0	0	0
hsa:26251	0	0	0	0	0	0	0	0	0	0	0	0	0	1	0	0	0	0	0	0	0	0	0	0	0	0	0	0	0	0	0	0	0	0	0	0	0	0	0	0	0	0	0	0	0	0	0	0	0
hsa:27012	0	0	0	0	0	0	0	0	0	0	0	0	0	1	0	0	0	0	0	0	0	0	0	0	0	0	0	0	0	0	0	0	0	0	0	0	0	0	0	0	0	0	0	0	0	0	0	0	0
hsa:27092	0	0	0	0	0	0	0	0	0	0	0	0	0	0	0	0	0	0	0	1	0	0	0	0	0	0	0	0	0	0	0	0	0	0	0	0	0	1	0	0	0	0	0	0	0	0	0	0	1
hsa:27094	0	0	0	0	0	0	0	0	0	0	0	0	0	1	0	0	0	0	0	0	0	0	0	0	0	0	0	0	0	0	0	0	0	0	0	0	0	0	0	0	0	0	0	0	0	0	0	0	0
hsa:27133	0	0	0	0	0	0	0	0	0	0	0	0	0	1	0	0	0	0	0	0	0	0	0	0	0	0	0	0	0	0	0	0	0	0	0	0	0	0	0	0	0	0	0	0	0	0	0	0	0
hsa:27345	0	0	0	0	0	0	0	0	0	0	0	0	0	1	0	0	0	0	0	0	0	0	0	0	0	0	0	0	0	0	0	0	0	0	0	0	0	0	0	0	0	0	0	0	0	0	0	0	0
hsa:2741	0	0	0	0	0	0	0	0	0	0	0	0	1	0	0	0	0	0	0	0	0	0	0	0	0	0	0	0	0	0	0	0	0	0	0	0	0	0	0	0	0	0	0	0	0	0	0	0	0
hsa:2742	0	0	0	0	0	0	0	0	0	0	0	0	1	0	0	0	0	0	0	0	0	0	0	0	0	0	0	0	0	0	0	0	0	0	0	0	0	0	0	0	0	0	0	0	0	0	0	0	0
hsa:2743	0	0	0	0	0	0	0	0	0	0	0	0	1	0	0	0	0	0	0	0	0	0	0	0	0	0	0	0	0	0	0	0	0	0	0	0	0	0	0	0	0	0	0	0	0	0	0	0	0
hsa:285242	0	0	0	0	0	0	0	0	0	0	0	1	0	0	0	0	0	0	0	0	0	0	0	0	0	0	0	0	0	0	0	0	0	0	0	0	0	0	0	1	0	0	0	0	0	0	0	0	0
hsa:2890	0	0	0	0	0	0	0	0	0	0	0	0	0	1	0	0	0	0	0	0	0	0	0	0	0	0	0	0	0	0	0	0	0	0	0	0	0	0	0	0	0	0	0	0	0	0	0	0	0
hsa:2891	0	0	0	0	0	0	0	0	0	0	0	0	0	1	0	0	0	0	0	0	0	0	0	0	0	0	0	0	0	0	0	0	0	0	0	0	0	0	0	0	0	0	0	0	0	0	0	0	0
hsa:2892	0	0	0	0	0	0	0	0	0	0	0	0	0	1	0	0	0	0	0	0	0	0	0	0	0	0	0	0	0	0	0	0	0	0	0	0	0	0	0	0	0	0	0	0	0	0	0	0	0
hsa:2893	0	0	0	0	0	0	0	0	0	0	0	0	0	1	0	0	0	0	0	0	0	0	0	0	0	0	0	0	0	0	0	0	0	0	0	0	0	0	0	0	0	0	0	0	0	0	0	0	0
hsa:2895	0	0	0	0	0	0	0	0	0	0	0	0	0	0	0	0	0	0	0	0	0	0	0	0	0	0	0	0	0	0	0	0	0	0	0	0	0	0	0	0	0	0	0	0	0	0	0	0	0
hsa:2897	0	0	0	0	0	0	0	0	0	0	0	0	0	0	0	0	0	0	0	0	0	0	0	0	0	0	0	0	0	0	0	0	0	0	0	0	0	0	0	0	0	0	0	0	0	0	0	0	0
hsa:2898	0	0	0	0	0	0	0	0	0	0	0	0	0	0	0	0	0	0	0	0	0	0	0	0	0	0	0	0	0	0	0	0	0	0	0	0	0	0	0	0	0	0	0	0	0	0	0	0	0
hsa:2899	0	0	0	0	0	0	0	0	0	0	0	0	0	0	0	0	0	0	0	0	0	0	0	0	0	0	0	0	0	0	0	0	0	0	0	0	0	0	0	0	0	0	0	0	0	0	0	0	0
hsa:2900	0	0	0	0	0	0	0	0	0	0	0	0	0	0	0	0	0	0	0	0	0	0	0	0	0	0	0	0	0	0	0	0	0	0	0	0	0	0	0	0	0	0	0	0	0	0	0	0	0
hsa:2901	0	0	0	0	0	0	0	0	0	0	0	0	0	0	0	0	0	0	0	0	0	0	0	0	0	0	0	0	0	0	0	0	0	0	0	0	0	0	0	0	0	0	0	0	0	0	0	0	0
hsa:2902	0	0	1	0	0	0	0	0	0	0	0	0	0	0	0	0	0	0	0	0	0	0	0	0	0	0	0	0	0	0	0	0	0	0	0	0	0	0	0	0	0	0	0	0	0	0	0	0	0
hsa:2903	0	0	1	0	0	0	0	0	0	0	0	0	0	0	0	0	0	0	0	0	0	0	0	0	0	0	0	0	0	0	0	0	0	0	0	0	0	0	0	0	0	0	0	0	0	0	0	0	0
hsa:2904	0	0	1	0	0	0	0	0	0	0	0	0	0	0	0	0	0	0	0	0	0	0	0	0	0	0	0	0	0	0	0	0	0	0	0	0	0	0	0	0	0	0	0	0	0	0	0	0	0
hsa:2905	0	0	1	0	0	0	0	0	0	0	0	0	0	0	0	0	0	0	0	0	0	0	0	0	0	0	0	0	0	0	0	0	0	0	0	0	0	0	0	0	0	0	0	0	0	0	0	0	0
hsa:2906	0	0	1	0	0	0	0	0	0	0	0	0	0	0	0	0	0	0	0	0	0	0	0	0	0	0	0	0	0	0	0	0	0	0	0	0	0	0	0	0	0	0	0	0	0	0	0	0	0
hsa:3359	0	0	0	0	0	0	0	0	0	0	0	1	0	0	0	0	0	0	0	0	0	0	0	0	0	0	0	0	0	0	0	0	0	0	0	0	0	0	0	1	1	0	0	0	0	0	0	0	0
hsa:3708	0	0	0	0	0	0	0	0	0	0	0	0	0	0	0	0	0	0	0	1	0	0	0	0	0	0	0	0	0	0	0	0	0	0	0	0	0	1	0	0	0	0	0	0	0	0	0	0	1
hsa:3710	0	0	0	0	0	0	0	0	0	0	0	0	0	0	0	0	0	0	0	1	0	0	0	0	0	0	0	0	0	0	0	0	0	0	0	0	0	1	0	0	0	0	0	0	0	0	0	0	1
hsa:3736	0	0	0	0	0	0	0	0	0	0	0	0	0	1	0	0	0	0	0	0	0	0	0	0	0	0	0	0	0	0	0	0	0	0	0	0	0	0	0	0	0	0	0	0	0	0	0	0	0
hsa:3737	0	0	0	0	0	0	0	0	0	0	0	0	0	1	0	0	0	0	0	0	0	0	0	0	0	0	0	0	0	0	0	0	0	0	0	0	0	0	0	0	0	0	0	0	0	0	0	0	0
hsa:3738	0	0	0	0	0	0	0	0	0	0	0	0	0	1	0	0	0	0	0	0	0	0	0	0	0	0	0	0	0	0	0	0	0	0	0	0	0	0	0	0	0	0	0	0	0	0	0	0	0
hsa:3739	0	0	0	0	0	0	0	0	0	0	0	0	0	1	0	0	0	0	0	0	0	0	0	0	0	0	0	0	0	0	0	0	0	0	0	0	0	0	0	0	0	0	0	0	0	0	0	0	0
hsa:3741	0	0	0	0	0	0	0	0	0	0	0	0	0	1	0	0	0	0	0	0	0	0	0	0	0	0	0	0	0	1	0	0	0	0	0	0	0	0	0	0	0	0	0	0	0	0	0	0	0
hsa:3742	0	0	0	0	0	0	0	0	0	0	0	0	0	1	0	0	0	0	0	0	0	0	0	0	0	0	0	0	0	0	0	0	0	0	0	0	0	0	0	0	0	0	0	0	0	0	0	0	0
hsa:3743	0	0	0	0	0	0	0	0	0	0	0	0	0	1	0	0	0	0	0	0	0	0	0	0	0	0	0	0	0	0	0	0	0	0	0	0	0	0	0	0	0	0	0	0	0	0	0	0	0
hsa:3744	0	0	0	0	0	0	0	0	0	0	0	0	0	1	0	0	0	0	0	0	0	0	0	0	0	0	1	0	0	0	0	0	0	0	0	0	0	0	0	0	0	0	0	0	0	0	0	0	0
hsa:3745	0	0	0	0	0	0	0	0	0	0	0	0	0	1	0	0	0	0	0	0	0	0	0	0	0	0	0	0	0	0	0	0	0	0	0	0	0	0	0	0	0	0	0	0	0	0	0	0	0
hsa:3746	0	0	0	0	0	0	0	0	0	0	0	0	0	1	0	0	0	0	0	0	0	0	0	0	0	0	0	0	0	0	0	0	0	0	0	0	0	0	0	0	0	0	0	0	0	0	0	0	0
hsa:3747	0	0	0	0	0	0	0	0	0	0	0	0	0	1	0	0	0	0	0	0	0	0	0	0	0	0	0	0	0	0	0	0	0	0	0	0	0	0	0	0	0	0	0	0	0	0	0	0	0
hsa:3748	0	0	0	0	0	0	0	0	0	0	0	0	0	1	0	0	0	0	0	0	0	0	0	0	0	0	0	0	0	0	0	0	0	0	0	0	0	0	0	0	0	0	0	0	0	0	0	0	0
hsa:3749	0	0	0	0	0	0	0	0	0	0	0	0	0	1	0	0	0	0	0	0	0	0	0	0	0	0	0	0	0	0	0	0	0	0	0	0	0	0	0	0	0	0	0	0	0	0	0	0	0
hsa:3750	0	0	0	0	0	0	0	0	0	0	0	0	0	1	0	0	0	0	0	0	0	0	0	0	0	0	0	0	0	0	0	0	0	0	0	0	0	0	0	0	0	0	0	0	0	0	0	0	0
hsa:3751	0	0	0	0	0	0	0	0	0	0	0	0	0	1	0	0	0	0	0	0	0	0	0	0	0	0	0	0	0	0	0	0	0	0	0	0	0	0	0	0	0	0	0	0	0	0	0	0	0
hsa:3752	0	0	0	0	0	0	0	0	0	0	0	0	0	1	0	0	0	0	0	0	0	0	0	0	0	0	0	0	0	0	0	0	0	0	0	0	0	0	0	0	0	0	0	0	0	0	0	0	0
hsa:3753	0	0	0	0	0	0	0	0	0	0	0	0	0	1	0	0	0	0	0	0	0	0	0	0	1	0	0	0	0	0	0	0	0	0	0	0	0	0	0	0	0	0	0	0	0	0	0	0	0
hsa:3754	0	0	0	0	0	0	0	0	0	0	0	0	0	1	0	0	0	0	0	0	0	0	0	0	0	0	0	0	0	0	0	0	0	0	0	0	0	0	0	0	0	0	0	0	0	0	0	0	0
hsa:3755	0	0	0	0	0	0	0	0	0	0	0	0	0	1	0	0	0	0	0	0	0	0	0	0	0	0	0	0	0	0	0	0	0	0	0	0	0	0	0	0	0	0	0	0	0	0	0	0	0
hsa:3756	0	0	0	0	0	0	0	0	0	0	0	0	0	1	0	0	0	0	0	0	0	0	0	0	0	0	0	0	0	0	0	0	0	0	0	0	0	0	0	0	0	0	0	0	0	0	0	0	0
hsa:3757	0	0	0	0	0	0	0	0	1	0	1	0	0	1	0	0	0	0	0	0	0	0	0	0	0	0	1	0	0	0	0	0	0	0	0	0	0	0	0	0	0	0	0	0	0	0	0	0	0
hsa:3758	0	0	0	0	1	0	0	0	0	0	0	0	0	1	0	0	0	0	0	0	1	1	0	0	0	0	0	0	0	0	0	0	1	1	0	0	1	0	0	0	0	0	0	0	0	0	0	0	0
hsa:3759	0	0	0	0	0	0	0	0	0	0	0	0	0	1	0	0	0	0	0	0	0	0	0	0	0	0	0	0	0	0	0	0	0	0	0	0	0	0	0	0	0	0	0	0	0	0	0	0	0
hsa:3760	0	0	0	0	0	0	0	0	0	0	0	0	0	1	0	0	0	0	0	0	0	0	0	0	0	0	0	0	0	0	0	0	0	0	0	0	0	0	0	0	0	0	0	0	0	0	0	0	0
hsa:3761	0	0	0	0	0	0	0	0	0	0	0	0	0	1	0	0	0	0	0	0	0	0	0	0	0	0	0	0	0	0	0	0	0	0	0	0	0	0	0	0	0	0	0	0	0	0	0	0	0
hsa:3762	0	0	0	0	0	0	0	0	0	0	0	0	0	1	0	0	0	0	0	0	0	0	0	0	0	0	0	0	0	0	0	0	0	0	0	0	0	0	0	0	0	0	0	0	0	0	0	0	0
hsa:3763	0	0	0	0	0	0	0	0	0	0	0	0	0	1	0	0	1	0	0	0	0	0	0	0	0	0	0	0	0	0	0	1	0	0	0	0	0	0	0	0	0	0	0	0	0	0	0	0	0
hsa:3764	0	0	0	0	0	0	0	0	0	0	0	0	0	1	0	0	0	0	0	0	0	0	0	0	0	0	0	0	0	0	0	0	0	0	0	0	0	0	0	0	0	0	0	0	0	0	0	0	0
hsa:3765	0	0	0	0	0	0	0	0	0	0	0	0	0	1	0	0	0	0	0	0	0	0	0	0	0	0	0	0	0	0	0	0	0	0	0	0	0	0	0	0	0	0	0	0	0	0	0	0	0
hsa:3766	0	0	0	0	0	0	0	0	0	0	0	0	0	1	0	0	0	0	0	0	0	0	0	0	0	0	0	0	0	0	0	0	0	0	0	0	0	0	0	0	0	0	0	0	0	0	0	0	0
hsa:3767	0	0	0	0	0	0	0	0	0	0	0	0	0	0	0	0	0	0	0	0	1	0	0	0	0	0	0	0	0	0	0	0	1	0	0	0	0	0	0	0	0	0	0	0	0	0	0	0	0
hsa:3768	0	0	0	0	0	0	0	0	0	0	0	0	0	1	0	0	0	0	0	0	0	0	0	0	0	0	0	0	0	0	0	0	0	0	0	0	0	0	0	0	0	0	0	0	0	0	0	0	0
hsa:3769	0	0	0	0	0	0	0	0	0	0	0	0	0	1	0	0	0	0	0	0	0	0	0	0	0	0	0	0	0	0	0	0	0	0	0	0	0	0	0	0	0	0	0	0	0	0	0	0	0
hsa:3772	0	0	0	0	0	0	0	0	0	0	0	0	0	1	0	0	0	0	0	0	0	0	0	0	0	0	0	0	0	0	0	0	0	0	0	0	0	0	0	0	0	0	0	0	0	0	0	0	0
hsa:3773	0	0	0	0	0	0	0	0	0	0	0	0	0	1	0	0	0	0	0	0	0	0	0	0	0	0	0	0	0	0	0	0	0	0	0	0	0	0	0	0	0	0	0	0	0	0	0	0	0
hsa:3775	0	0	0	0	0	0	0	0	0	0	0	0	0	1	0	0	0	0	0	0	0	0	0	0	0	0	0	0	0	0	0	0	0	0	0	0	0	0	0	0	0	0	0	0	0	0	0	0	0
hsa:3776	0	0	0	0	0	0	0	0	0	0	0	0	0	0	0	0	0	0	0	0	0	0	0	0	0	0	0	0	0	0	0	0	0	0	0	0	0	0	0	0	0	0	0	0	0	0	0	0	0
hsa:3778	0	0	0	0	0	0	0	0	0	0	0	0	0	1	0	0	0	0	0	0	0	0	0	1	0	0	0	0	0	0	0	0	0	0	0	0	0	0	0	0	0	0	0	0	0	0	0	0	0
hsa:3779	0	0	0	0	0	0	0	0	0	0	0	0	0	1	0	0	0	0	0	0	0	0	0	0	0	0	0	0	0	0	0	0	0	0	0	0	0	0	0	0	0	0	0	0	0	0	0	0	0
hsa:3780	0	0	0	0	0	0	0	0	0	0	0	0	0	1	0	0	1	0	0	0	0	0	0	0	0	0	0	0	0	0	0	0	0	0	0	0	0	0	0	0	0	0	0	0	0	0	0	0	0
hsa:3781	0	0	0	0	0	0	0	0	0	0	0	0	0	1	0	0	1	0	0	0	0	0	0	0	0	0	0	0	0	0	0	0	0	0	0	0	0	0	0	0	0	0	0	0	0	0	0	0	0
hsa:3782	0	0	0	0	0	0	0	0	0	0	0	0	0	1	0	0	1	0	0	0	0	0	0	0	0	0	0	0	0	0	0	0	0	0	0	0	0	0	0	0	0	0	0	0	1	0	0	0	0
hsa:3783	0	0	0	0	0	0	1	0	0	0	0	0	0	1	0	0	0	0	0	0	0	0	0	0	0	0	1	0	0	0	0	0	0	0	0	0	0	0	0	0	0	0	0	0	0	0	0	0	0
hsa:3784	0	0	0	0	0	0	0	0	0	0	0	0	0	1	0	0	0	0	0	0	0	0	0	0	1	0	0	0	0	0	0	0	0	0	0	0	0	0	0	0	0	0	0	0	0	0	0	0	0
hsa:3785	0	0	0	0	0	0	0	0	0	0	0	0	0	1	0	0	0	0	0	0	0	0	0	0	0	0	0	0	0	0	0	0	0	0	0	0	0	0	0	0	0	0	0	0	0	0	0	0	0
hsa:3786	0	0	0	0	0	0	0	0	0	0	0	0	0	1	0	0	0	0	0	0	0	0	0	0	0	0	0	0	0	0	0	0	0	0	0	0	0	0	0	0	0	0	0	0	0	0	0	0	0
hsa:3787	0	0	0	0	0	0	0	0	0	0	0	0	0	1	0	0	0	0	0	0	0	0	0	0	0	0	0	0	0	0	0	0	0	0	0	0	0	0	0	0	0	0	0	0	0	0	0	0	0
hsa:3788	0	0	0	0	0	0	0	0	0	0	0	0	0	1	0	0	0	0	0	0	0	0	0	0	0	0	0	0	0	0	0	0	0	0	0	0	0	0	0	0	0	0	0	0	0	0	0	0	0
hsa:3790	0	0	0	0	0	0	0	0	0	0	0	0	0	1	0	0	0	0	0	0	0	0	0	0	0	0	0	0	0	0	0	0	0	0	0	0	0	0	0	0	0	0	0	0	0	0	0	0	0
hsa:40	0	0	0	0	0	0	0	0	0	0	0	0	0	0	0	0	0	0	0	0	0	0	0	0	0	0	0	0	0	0	0	0	0	0	0	0	0	0	0	0	0	0	0	0	0	0	0	0	0
hsa:41	0	0	0	0	0	0	0	0	0	0	0	0	0	0	0	0	0	0	0	0	0	0	0	0	0	0	0	0	0	0	0	0	0	0	0	0	0	0	0	0	0	0	0	0	0	0	0	0	0
hsa:5023	0	0	0	0	0	0	0	0	0	0	0	0	0	0	0	0	0	0	0	0	0	0	0	0	0	0	0	0	0	0	0	0	0	0	0	0	0	0	0	0	0	0	0	0	0	0	0	0	0
hsa:5024	0	0	0	0	0	0	0	0	0	0	0	0	0	0	0	0	0	0	0	0	0	0	0	0	0	0	0	0	0	0	0	0	0	0	0	0	0	0	0	0	0	0	0	0	0	0	0	0	0
hsa:5025	0	0	0	0	0	0	0	0	0	0	0	0	0	0	0	0	0	0	0	0	0	0	0	0	0	0	0	0	0	0	0	0	0	0	0	0	0	0	0	0	0	0	0	0	0	0	0	0	0
hsa:5026	0	0	0	0	0	0	0	0	0	0	0	0	0	0	0	0	0	0	0	0	0	0	0	0	0	0	0	0	0	0	0	0	0	0	0	0	0	0	0	0	0	0	0	0	0	0	0	0	0
hsa:5027	0	0	0	0	0	0	0	0	0	0	0	0	0	0	0	0	0	0	0	0	0	0	0	0	0	0	0	0	0	0	0	0	0	0	0	0	0	0	0	0	0	0	0	0	0	0	0	0	0
hsa:50801	0	0	0	0	0	0	0	0	0	0	0	0	0	1	0	0	0	0	0	0	0	0	0	0	0	0	0	0	0	0	0	0	0	0	0	0	0	0	0	0	0	0	0	0	0	0	0	0	0
hsa:51305	0	0	0	0	0	0	0	0	0	0	0	0	0	1	0	0	0	0	0	0	0	0	0	0	0	0	0	0	0	0	0	0	0	0	0	0	0	0	0	0	0	0	0	0	0	0	0	0	0
hsa:51802	0	0	0	0	0	0	0	0	0	1	0	0	0	0	1	0	0	0	0	1	0	0	0	0	0	0	0	0	0	0	0	0	0	0	0	0	0	0	0	0	0	0	0	0	0	0	0	0	1
hsa:5310	0	0	0	0	0	0	0	0	0	0	0	0	0	0	0	0	0	0	0	1	0	0	0	0	0	0	0	0	0	0	0	0	0	0	0	0	0	1	0	0	0	0	0	0	0	0	0	0	1
hsa:54207	0	0	0	0	0	0	0	0	0	0	0	0	0	1	0	0	0	0	0	0	0	0	0	0	0	0	0	0	0	0	0	0	0	0	0	0	0	0	0	0	0	0	0	0	0	0	0	0	0
hsa:55503	0	0	0	0	0	0	0	0	0	0	0	0	0	0	0	0	0	0	0	1	0	0	0	0	0	0	0	0	0	0	0	0	0	0	0	0	0	1	0	0	0	0	0	0	0	0	0	0	1
hsa:55515	0	0	0	0	0	0	0	0	0	1	0	0	0	0	1	0	0	0	0	1	0	0	0	0	0	0	0	0	0	0	0	0	0	0	0	0	0	0	0	0	0	0	0	0	0	0	0	0	1
hsa:55584	0	0	0	1	0	0	0	0	0	0	0	0	0	0	0	0	0	0	0	0	0	0	0	0	0	0	0	0	0	0	0	0	0	0	0	0	0	0	0	0	0	0	0	0	0	0	1	0	0
hsa:55799	0	0	0	0	0	0	0	0	0	0	0	0	0	0	0	0	0	0	0	1	0	0	0	0	0	0	0	0	0	0	0	0	0	0	0	0	0	1	0	0	0	0	0	0	0	0	0	0	1
hsa:55800	0	0	0	0	0	0	0	0	0	1	0	0	0	0	1	0	0	0	0	1	0	0	0	0	0	0	0	0	0	0	0	0	0	0	0	0	0	0	0	0	0	0	0	0	0	0	0	0	1
hsa:55879	0	0	0	0	0	1	0	0	0	0	0	0	1	0	0	0	0	1	0	0	0	0	0	0	0	0	0	0	0	0	0	0	0	0	0	0	0	0	0	0	0	0	0	0	0	0	1	0	0
hsa:56479	0	0	0	0	0	0	0	0	0	0	0	0	0	1	0	0	0	0	0	0	0	0	0	0	0	0	0	0	0	0	0	0	0	0	0	0	0	0	0	0	0	0	0	0	0	0	0	0	0
hsa:56659	0	0	0	0	0	0	0	0	0	0	0	0	0	1	0	0	0	0	0	0	0	0	0	0	0	0	0	0	0	0	0	0	0	0	0	0	0	0	0	0	0	0	0	0	0	0	0	0	0
hsa:56660	0	0	0	0	0	0	0	0	0	0	0	0	0	0	0	0	0	0	0	0	0	0	0	0	0	0	0	0	0	0	0	0	0	0	0	0	0	0	0	0	0	0	0	0	0	0	0	0	0
hsa:57053	0	0	0	1	0	0	0	0	0	0	0	0	0	0	0	0	0	0	0	0	0	0	0	0	0	0	0	0	0	0	0	0	0	0	0	0	0	0	0	0	0	0	0	0	0	0	1	0	0
hsa:57192	0	0	0	0	0	0	0	0	0	0	0	0	0	0	0	0	0	0	0	0	0	0	0	0	0	0	0	0	0	0	0	0	0	0	0	0	0	0	0	0	0	0	0	0	0	0	0	0	0
hsa:57657	0	0	0	0	0	0	0	0	0	0	0	0	0	1	0	0	0	0	0	0	0	0	0	0	0	0	0	0	0	0	0	0	0	0	0	0	0	0	0	0	0	0	0	0	0	0	0	0	0
hsa:59284	0	0	0	0	0	0	0	0	0	0	0	0	0	0	0	0	0	0	0	1	0	0	0	0	0	0	0	0	0	0	0	0	0	0	0	0	0	1	0	0	0	0	0	0	0	0	0	0	1
hsa:60598	0	0	0	0	0	0	0	0	0	0	0	0	0	1	0	0	0	0	0	0	0	0	0	0	0	0	0	0	0	0	0	0	0	0	0	0	0	0	0	0	0	0	0	0	0	0	0	0	0
hsa:6261	0	0	0	0	0	0	1	0	0	0	0	0	0	0	0	0	0	0	0	1	0	0	0	0	0	0	0	0	0	0	0	0	0	0	0	0	0	1	0	0	0	0	0	0	0	0	0	0	1
hsa:6262	0	0	0	0	0	0	1	0	0	0	0	0	0	0	0	0	0	0	0	1	0	0	0	0	0	0	0	0	0	0	0	0	0	0	0	0	0	1	0	0	0	0	0	0	0	0	0	0	1
hsa:6263	0	0	0	0	0	0	1	0	0	0	0	0	0	0	0	0	0	0	0	1	0	0	0	0	0	0	0	0	0	0	0	0	0	0	0	0	0	1	0	0	0	0	0	0	0	0	0	0	1
hsa:6323	0	0	0	0	0	0	0	0	0	0	0	0	0	0	0	0	0	0	0	0	0	0	0	0	0	0	0	1	1	0	0	0	0	0	0	0	0	0	0	0	0	0	0	1	0	0	0	1	0
hsa:6324	0	0	0	0	0	0	0	0	0	1	0	0	0	0	1	0	0	0	0	1	0	0	0	0	0	0	0	0	0	0	0	0	0	0	0	0	0	0	0	0	0	0	0	0	0	0	0	0	1
hsa:6326	0	0	0	0	0	0	0	0	0	0	0	0	0	0	0	0	0	0	0	0	0	0	0	0	0	0	0	1	1	0	0	0	0	0	0	0	0	0	0	0	0	0	0	1	0	0	0	0	0
hsa:6328	0	0	0	0	0	0	0	0	0	1	0	0	0	0	1	0	0	0	0	1	0	0	0	0	0	0	0	1	1	0	0	0	0	0	0	0	0	0	0	0	0	0	0	1	0	0	0	0	1
hsa:6329	0	0	0	0	0	0	0	0	0	1	0	0	0	0	1	0	0	0	0	1	0	0	0	0	0	0	0	1	1	0	0	0	0	0	0	0	0	0	0	0	0	0	0	1	0	0	0	0	1
hsa:6330	0	0	0	0	0	0	0	0	0	1	0	0	0	0	1	0	0	0	0	1	0	0	0	0	0	0	0	0	0	0	0	0	0	0	0	0	0	0	0	0	0	0	0	0	0	0	0	0	1
hsa:6331	0	1	0	0	0	0	0	0	0	1	0	0	0	0	1	0	0	0	0	1	0	0	0	0	0	0	0	1	1	0	0	0	0	0	0	0	0	0	0	0	0	0	0	1	0	0	0	0	1
hsa:6332	0	0	0	0	0	0	0	0	0	1	0	0	0	0	1	0	0	0	0	1	0	0	0	0	0	0	0	0	0	0	0	0	0	0	0	0	0	0	0	0	0	0	0	0	0	0	0	0	1
hsa:6334	0	0	0	0	0	0	0	0	0	0	0	0	0	0	0	0	0	0	0	0	0	0	0	0	0	0	0	1	1	0	0	0	0	0	0	0	0	0	0	0	0	0	0	1	0	0	0	0	0
hsa:6335	0	0	0	0	0	0	0	0	0	0	0	0	0	0	0	0	0	0	0	0	0	0	0	0	0	0	0	1	1	0	0	0	0	0	0	0	0	0	0	0	0	0	0	1	0	0	0	0	0
hsa:6336	0	1	0	0	0	0	0	0	0	1	0	0	0	0	1	0	0	0	0	1	0	0	0	0	0	0	0	0	1	0	0	0	0	0	0	0	0	0	0	0	0	0	0	0	0	0	0	0	1
hsa:6337	0	0	0	0	0	0	0	0	0	1	0	0	0	0	1	0	0	0	0	1	0	0	0	0	0	0	0	0	0	0	0	0	0	0	0	0	0	0	0	0	0	0	0	0	0	0	0	0	1
hsa:6338	0	0	0	0	0	0	0	0	0	1	0	0	0	0	1	0	0	0	0	1	0	0	0	0	0	0	0	0	0	0	0	0	0	0	0	0	0	0	0	0	0	0	0	0	0	0	0	0	1
hsa:6339	0	0	0	0	0	0	0	0	0	1	0	0	0	0	1	0	0	0	0	1	0	0	0	0	0	0	0	0	0	0	0	0	0	0	0	0	0	0	0	0	0	0	0	0	0	0	0	0	1
hsa:6340	0	0	0	0	0	0	0	0	0	1	0	0	0	0	1	0	0	0	0	1	0	0	0	0	0	0	0	0	0	0	0	0	0	0	0	0	0	0	0	0	0	0	0	0	0	0	0	0	1
hsa:6529	0	1	0	0	0	0	0	0	0	0	0	0	0	0	0	0	0	0	0	0	0	0	0	0	0	0	0	0	0	0	0	0	0	0	0	0	0	0	0	0	0	0	0	0	0	0	0	0	0
hsa:6530	0	1	0	0	0	0	0	1	0	0	0	0	0	0	0	0	0	0	0	0	0	0	0	0	0	0	0	0	0	0	1	0	0	0	0	1	0	0	0	0	0	0	0	0	0	0	0	0	0
hsa:6531	0	1	0	0	0	0	0	0	0	0	0	0	0	0	0	0	0	0	0	0	0	0	0	0	0	0	0	0	0	0	1	0	0	0	0	0	0	0	0	0	0	0	0	0	0	0	0	0	0
hsa:6532	0	1	0	0	0	0	0	1	0	0	0	0	0	0	0	0	0	0	0	0	0	0	0	0	0	0	0	0	0	0	0	0	0	0	0	1	0	0	0	0	0	0	0	0	0	0	0	0	0
hsa:6534	1	0	0	0	0	0	0	0	0	0	0	0	0	0	0	0	0	0	0	0	0	0	0	0	0	0	0	0	0	0	0	0	0	0	0	0	0	0	0	0	0	0	0	0	0	0	0	0	0
hsa:6833	0	0	0	0	0	0	0	0	0	0	0	0	0	1	0	0	0	0	0	0	0	1	0	0	0	0	0	0	0	0	0	0	0	1	0	0	0	0	0	0	0	0	0	0	0	0	0	0	0
hsa:7225	0	0	0	0	0	0	0	0	0	0	0	0	0	0	0	0	0	0	0	0	0	0	0	0	0	0	0	0	0	0	0	0	0	0	0	0	0	0	0	0	0	0	0	0	0	0	0	0	0
hsa:773	0	0	0	0	0	0	0	0	0	0	0	0	0	0	0	1	0	0	0	1	0	0	0	0	0	0	0	0	0	0	0	0	0	0	0	0	0	1	0	0	0	0	0	0	0	0	0	0	1
hsa:774	0	0	0	0	0	0	0	0	0	0	0	0	0	0	0	0	0	0	0	1	0	0	0	0	0	0	0	0	0	0	0	0	0	0	0	0	0	1	0	0	0	0	0	0	0	0	0	0	1
hsa:775	0	0	0	0	0	0	0	0	0	0	0	0	0	0	0	1	0	0	0	1	0	0	0	0	0	1	0	0	0	0	0	0	0	0	0	0	0	1	1	0	0	0	0	0	0	0	0	0	1
hsa:776	0	0	0	0	0	0	0	0	0	0	0	0	0	0	0	1	0	0	0	1	0	0	0	0	0	1	0	0	0	0	0	0	0	0	0	0	0	1	1	0	0	0	0	0	0	0	0	0	1
hsa:777	0	0	0	0	0	0	0	0	0	0	0	0	0	0	0	0	0	0	0	1	0	0	0	0	0	0	0	0	0	0	0	0	0	0	0	0	0	1	0	0	0	0	0	0	0	0	0	0	1
hsa:778	0	0	0	0	0	0	0	0	0	0	0	0	0	0	0	1	0	0	0	1	0	0	0	0	0	1	0	0	0	0	0	0	0	0	0	0	0	1	1	0	0	0	0	0	0	0	0	0	1
hsa:779	0	0	0	0	0	0	0	0	0	0	0	0	0	0	0	1	0	0	0	1	0	0	0	0	0	1	0	0	0	0	0	0	0	0	0	0	0	1	0	0	0	0	0	0	0	0	0	0	1
hsa:781	0	0	0	0	0	0	0	0	0	0	0	0	0	0	0	0	0	0	0	1	0	0	0	0	0	1	0	0	0	0	0	0	0	0	0	0	0	1	0	0	0	0	0	0	0	0	0	0	1
hsa:782	0	0	0	0	0	0	0	0	0	0	0	0	0	0	0	0	0	0	0	1	0	0	0	0	0	0	0	0	0	0	0	0	0	0	0	0	0	1	0	0	0	0	0	0	0	0	0	0	1
hsa:783	0	0	0	0	0	0	0	0	0	0	0	0	0	0	0	0	0	0	0	1	0	0	0	0	0	1	0	0	0	0	0	0	0	0	0	0	0	1	1	0	0	0	0	0	0	0	0	0	1
hsa:784	0	0	0	0	0	0	0	0	0	0	0	0	0	0	0	0	0	0	0	1	0	0	0	0	0	0	0	0	0	0	0	0	0	0	0	0	0	1	0	0	0	0	0	0	0	0	0	0	1
hsa:785	0	0	0	0	0	0	0	0	0	0	0	0	0	0	0	0	0	0	0	1	0	0	0	0	0	0	0	0	0	0	0	0	0	0	0	0	0	1	0	0	0	0	0	0	0	0	0	0	1
hsa:786	0	0	0	0	0	0	0	0	0	0	0	0	0	0	0	0	0	0	0	1	0	0	0	0	0	1	0	0	0	0	0	0	0	0	0	0	0	1	1	0	0	0	0	0	0	0	0	0	1
hsa:7881	0	0	0	0	0	0	0	0	0	0	0	0	0	1	0	0	0	0	0	0	0	0	0	0	0	0	0	0	0	0	0	0	0	0	0	0	0	0	0	0	0	0	0	0	0	0	0	0	0
hsa:8001	0	0	0	0	0	0	0	0	0	0	0	0	0	0	0	0	0	0	0	0	0	0	0	0	0	0	0	0	0	0	0	0	0	0	0	0	0	0	0	0	0	0	0	0	0	0	0	0	0
hsa:81033	0	0	0	0	0	0	0	0	0	0	0	0	0	1	0	0	0	0	0	0	0	0	0	0	0	0	0	0	0	0	0	0	0	0	0	0	0	0	0	0	0	0	0	0	0	0	0	0	0
hsa:83795	0	0	0	0	0	0	0	0	0	0	0	0	0	1	0	0	0	0	0	0	0	0	0	0	0	0	0	0	0	0	0	0	0	0	0	0	0	0	0	0	0	0	0	0	0	0	0	0	0
hsa:8514	0	0	0	0	0	0	0	0	0	0	0	0	0	1	0	0	0	0	0	0	0	0	0	0	0	0	0	0	0	0	0	0	0	0	0	0	0	0	0	0	0	0	0	0	0	0	0	0	0
hsa:8645	0	0	0	0	0	0	0	0	0	0	0	0	0	1	0	0	0	0	0	0	0	0	0	0	0	0	0	0	1	0	0	0	0	0	0	0	0	0	0	0	0	0	0	0	0	0	0	0	0
hsa:8911	0	0	0	0	0	0	0	0	0	0	0	0	0	0	0	0	0	0	0	1	0	0	0	0	0	1	0	0	0	0	0	0	0	0	0	0	0	1	0	0	0	0	0	0	0	1	0	0	1
hsa:8912	0	0	0	0	0	0	0	0	0	0	0	0	0	0	0	0	0	0	0	1	0	0	0	0	0	1	0	0	0	0	0	0	0	0	0	0	0	1	0	0	0	0	0	0	0	0	0	0	1
hsa:8913	0	0	0	0	0	0	0	0	0	0	0	0	0	0	0	0	0	0	0	1	0	0	0	0	0	1	0	0	0	0	0	0	0	0	1	0	0	1	0	0	0	0	0	0	0	0	0	0	1
hsa:8973	0	0	0	1	0	0	0	0	0	0	0	0	0	0	0	0	0	0	0	0	0	0	0	0	0	0	0	0	0	0	0	0	0	0	0	0	0	0	0	0	0	0	0	0	0	0	1	0	0
hsa:89822	0	0	0	0	0	0	0	0	0	0	0	0	0	1	0	0	0	0	0	0	0	0	0	0	0	0	0	0	0	0	0	0	0	0	0	0	0	0	0	0	0	0	0	0	0	0	0	0	0
hsa:8989	0	0	0	0	0	0	0	0	0	0	0	0	0	0	0	0	0	0	0	1	0	0	0	0	0	0	0	0	0	0	0	0	0	0	0	0	0	1	0	0	0	0	0	0	0	0	0	0	1
hsa:90134	0	0	0	0	0	0	0	0	0	0	0	0	0	1	0	0	0	0	0	0	0	0	0	0	0	0	0	0	0	0	0	0	0	0	0	0	0	0	0	0	0	0	0	0	0	0	0	0	0
hsa:9127	0	0	0	0	0	0	0	0	0	0	0	0	0	0	0	0	0	0	0	0	0	0	0	0	0	0	0	0	0	0	0	0	0	0	0	0	0	0	0	0	0	0	0	0	0	0	0	0	0
hsa:9132	0	0	0	0	0	0	0	0	0	0	0	0	0	1	0	0	0	0	0	0	0	0	0	0	0	0	0	0	0	0	0	0	0	0	0	0	0	0	0	0	0	0	0	0	0	0	0	0	0
hsa:9177	0	0	0	0	0	0	0	0	0	0	0	1	0	0	0	0	0	0	0	0	0	0	0	0	0	0	0	0	0	0	0	0	0	0	0	0	0	0	0	1	0	0	0	0	0	0	0	0	0
hsa:9254	0	0	0	0	0	0	0	0	0	0	0	0	0	0	0	0	0	0	0	1	0	0	0	0	0	0	0	0	0	0	0	0	0	0	0	0	0	1	0	0	0	0	0	0	0	0	0	0	1
hsa:93107	0	0	0	0	0	0	0	0	0	0	0	0	0	1	0	0	0	0	0	0	0	0	0	0	0	0	0	0	0	0	0	0	0	0	0	0	0	0	0	0	0	0	0	0	0	0	0	0	0
hsa:9311	0	0	0	0	0	0	0	0	0	1	0	0	0	0	1	0	0	0	0	1	0	0	0	0	0	0	0	0	0	0	0	0	0	0	0	0	0	0	0	0	0	0	0	0	0	0	0	0	1
hsa:9312	0	0	0	0	0	0	0	0	0	0	0	0	0	1	0	0	0	0	0	0	0	0	0	0	0	0	0	0	0	0	0	0	0	0	0	0	0	0	0	0	0	0	0	0	0	0	0	0	0
hsa:93589	0	0	0	0	0	0	0	0	0	0	0	0	0	0	0	0	0	0	0	1	0	0	0	0	0	1	0	0	0	0	0	0	0	0	0	0	0	1	1	0	0	0	0	0	0	0	0	0	1
hsa:9424	0	0	0	0	0	0	0	0	0	0	0	0	0	1	0	0	0	0	0	0	0	0	0	0	0	0	0	0	0	0	0	0	0	0	0	0	0	0	0	0	0	0	0	0	0	0	0	0	0
hsa:9992	0	0	0	0	0	0	0	0	0	0	0	0	0	1	0	0	0	0	0	0	0	0	0	0	0	0	0	0	0	0	0	0	0	0	0	0	0	0	0	0	0	0	0	0	0	0	0	0	0
[truncated: 161 more columns]

## Sheet: drug similarity
1	0.111111	0.0625	0.107143	0.153846	0.034483	0	0.111111	0.076923	0	0.081081	0.107143	0.037037	0	0	0.03125	0	0.029412	0.115385	0.428571	0.114286	0.108108	0.032258	0.086957	0.066667	0.029412	0.073171	0	0	0.060606	0.076923	0.137931	0.115385	0	0	0.071429	0.15	0.03125	0.027027	0	0.111111	0.037037	0.090909	0	0	0	0.043478	0	0.038462	0
0.111111	1	0.2	0.285714	0.294118	0.222222	0.106383	0.222222	0.217391	0.176471	0.255814	0.25	0.272727	0.16129	0.205128	0.342857	0.189189	0.195122	0.102564	0.096774	0.232558	0.222222	0.210526	0.114286	0.179487	0.324324	0.208333	0.117647	0.181818	0.289474	0.2	0.305556	0.30303	0.212121	0.103448	0.257143	0.15625	0.382353	0.3	0.166667	0.294118	0.2	0.266667	0.212121	0.194444	0.1	0.055556	0.206897	0.171429	0.176471
0.0625	0.2	1	0.225	0.333333	0.333333	0.142857	0.454545	0.463415	0.294118	0.526316	0.441176	0.352941	0.212121	0.342105	0.159091	0.411765	0.358974	0.205128	0.1875	0.425	0.475	0.388889	0.162162	0.351351	0.081633	0.44186	0.2	0.228571	0.394737	0.483871	0.416667	0.382353	0.294118	0.058824	0.333333	0.242424	0.085106	0.12	0.210526	0.263158	0.352941	0.2	0.333333	0.305556	0.057143	0.076923	0.21875	0.323529	0.257143
0.107143	0.285714	0.225	1	0.216216	0.184211	0.12766	0.25	0.212766	0.171429	0.25	0.243243	0.194444	0.193548	0.142857	0.170732	0.153846	0.190476	0.128205	0.129032	0.2	0.217391	0.146341	0.142857	0.205128	0.190476	0.229167	0.147059	0.212121	0.219512	0.228571	0.297297	0.222222	0.138889	0.1	0.216216	0.266667	0.170732	0.177778	0.194444	0.25	0.194444	0.181818	0.171429	0.157895	0.133333	0.083333	0.090909	0.135135	0.242424
0.153846	0.294118	0.333333	0.216216	1	0.189189	0.083333	0.257143	0.302326	0.176471	0.35	0.285714	0.2	0.285714	0.205128	0.119048	0.189189	0.166667	0.228571	0.172414	0.65625	0.617647	0.15	0.258065	0.352941	0.113636	0.26087	0.117647	0.258065	0.25641	0.235294	0.305556	0.72	0.538462	0.032258	0.189189	0.275862	0.146341	0.130435	0.272727	0.222222	0.166667	0.225806	0.290323	0.131579	0.03125	0.027027	0.346154	0.138889	0.176471
0.034483	0.222222	0.333333	0.184211	0.189189	1	0.209302	0.419355	0.333333	0.333333	0.317073	0.451613	0.68	0.333333	0.305556	0.175	0.375	0.484848	0.30303	0.030303	0.232558	0.341463	0.533333	0.21875	0.393939	0.166667	0.348837	0.310345	0.147059	0.361111	0.5	0.382353	0.194444	0.176471	0.032258	0.375	0.15625	0.146341	0.130435	0.235294	0.375	0.555556	0.266667	0.212121	0.387097	0.03125	0.027027	0.206897	0.366667	0.212121
0	0.106383	0.142857	0.12766	0.083333	0.209302	1	0.130435	0.230769	0.170732	0.215686	0.152174	0.190476	0.157895	0.25	0.170213	0.181818	0.23913	0.186047	0.05	0.150943	0.166667	0.173913	0.119048	0.173913	0.1875	0.178571	0.179487	0.205128	0.163265	0.111111	0.222222	0.085106	0.170732	0.111111	0.238095	0.097561	0.145833	0.176471	0.25	0.268293	0.162791	0.15	0.170732	0.243902	0.108108	0.179487	0.102564	0.113636	0.2
0.111111	0.222222	0.454545	0.25	0.257143	0.419355	0.130435	1	0.435897	0.37931	0.35	0.666667	0.448276	0.285714	0.236842	0.205128	0.294118	0.4	0.30303	0.133333	0.292683	0.375	0.393939	0.258065	0.352941	0.166667	0.348837	0.266667	0.147059	0.53125	0.555556	0.516129	0.30303	0.142857	0.032258	0.333333	0.275862	0.205128	0.130435	0.2	0.333333	0.448276	0.225806	0.142857	0.387097	0.03125	0.027027	0.166667	0.366667	0.176471
0.076923	0.217391	0.463415	0.212766	0.302326	0.333333	0.230769	0.435897	1	0.238095	0.466667	0.461538	0.317073	0.2	0.282609	0.156863	0.333333	0.386364	0.222222	0.15	0.382979	0.456522	0.288889	0.133333	0.318182	0.150943	0.428571	0.190476	0.186047	0.386364	0.421053	0.404762	0.27907	0.238095	0.047619	0.333333	0.225	0.134615	0.142857	0.285714	0.302326	0.285714	0.162791	0.268293	0.309524	0.071429	0.086957	0.175	0.232558	0.209302
0	0.176471	0.294118	0.171429	0.176471	0.333333	0.170732	0.37931	0.238095	1	0.282051	0.366667	0.407407	0.230769	0.433333	0.131579	0.290323	0.323529	0.3	0.034483	0.25641	0.275	0.354839	0.166667	0.448276	0.125	0.255814	0.307692	0.25	0.285714	0.357143	0.387097	0.181818	0.2	0.037037	0.481481	0.178571	0.162162	0.090909	0.1875	0.290323	0.357143	0.172414	0.2	0.5	0.035714	0	0.347826	0.37037	0.2
0.081081	0.255814	0.526316	0.25	0.35	0.317073	0.215686	0.35	0.466667	0.282051	1	0.375	0.333333	0.179487	0.325581	0.1875	0.35	0.372093	0.232558	0.128205	0.4	0.477273	0.333333	0.195122	0.365854	0.134615	0.416667	0.230769	0.225	0.311111	0.368421	0.390244	0.325	0.315789	0.076923	0.35	0.205128	0.14	0.192308	0.268293	0.285714	0.3	0.170732	0.315789	0.325	0.075	0.090909	0.25	0.186047	0.25
0.107143	0.25	0.441176	0.243243	0.285714	0.451613	0.152174	0.666667	0.461538	0.366667	0.375	1	0.482759	0.275862	0.263158	0.2	0.323529	0.428571	0.294118	0.129032	0.317073	0.4	0.382353	0.212121	0.382353	0.162791	0.404762	0.258065	0.176471	0.5625	0.592593	0.548387	0.294118	0.171429	0.064516	0.363636	0.266667	0.170732	0.177778	0.228571	0.363636	0.482759	0.21875	0.171429	0.419355	0.0625	0.054054	0.16129	0.354839	0.205882
0.037037	0.272727	0.352941	0.194444	0.2	0.68	0.190476	0.448276	0.317073	0.407407	0.333333	0.482759	1	0.307692	0.323529	0.184211	0.4	0.62069	0.322581	0.032258	0.243902	0.358974	0.76	0.233333	0.419355	0.146341	0.333333	0.285714	0.15625	0.382353	0.538462	0.40625	0.205882	0.1875	0.153846	0.4	0.166667	0.153846	0.136364	0.25	0.354839	0.73913	0.333333	0.225806	0.413793	0.148148	0.090909	0.222222	0.444444	0.225806
0	0.16129	0.212121	0.193548	0.285714	0.333333	0.157895	0.285714	0.2	0.230769	0.179487	0.275862	0.307692	1	0.181818	0.181818	0.2	0.242424	0.346154	0	0.25	0.27027	0.266667	0.347826	0.310345	0.171429	0.190476	0.304348	0.192308	0.242424	0.259259	0.21875	0.25	0.333333	0.043478	0.2	0.16	0.181818	0.157895	0.36	0.241379	0.307692	0.2	0.230769	0.296296	0.041667	0.034483	0.173913	0.178571	0.28
0	0.205128	0.342105	0.142857	0.205128	0.305556	0.25	0.236842	0.282609	0.433333	0.325581	0.263158	0.323529	0.181818	1	0.190476	0.382353	0.368421	0.210526	0.057143	0.333333	0.318182	0.289474	0.135135	0.324324	0.238095	0.244898	0.205882	0.354839	0.238095	0.285714	0.351351	0.210526	0.34375	0.09375	0.424242	0.111111	0.219512	0.27907	0.285714	0.305556	0.285714	0.205882	0.387097	0.4375	0.090909	0.108108	0.310345	0.333333	0.30303
0.03125	0.342857	0.159091	0.170732	0.119048	0.175	0.170213	0.205128	0.156863	0.131579	0.1875	0.2	0.184211	0.181818	0.190476	1	0.205128	0.238095	0.15	0.027778	0.12	0.137255	0.195122	0.166667	0.166667	0.733333	0.150943	0.242424	0.272727	0.3	0.153846	0.219512	0.095238	0.162162	0.09375	0.236842	0.081081	0.666667	0.571429	0.25	0.205128	0.184211	0.205882	0.228571	0.277778	0.125	0.138889	0.117647	0.157895	0.264706
0	0.189189	0.411765	0.153846	0.189189	0.375	0.181818	0.294118	0.333333	0.290323	0.35	0.323529	0.4	0.2	0.382353	0.205128	1	0.4	0.264706	0.030303	0.292683	0.341463	0.483871	0.147059	0.314286	0.139535	0.348837	0.266667	0.181818	0.25641	0.354839	0.382353	0.194444	0.290323	0.032258	0.333333	0.088235	0.146341	0.181818	0.3125	0.257143	0.354839	0.225806	0.333333	0.387097	0.064516	0.117647	0.25	0.366667	0.290323
0.029412	0.195122	0.358974	0.190476	0.166667	0.484848	0.23913	0.4	0.386364	0.323529	0.372093	0.428571	0.62069	0.242424	0.368421	0.238095	0.4	1	0.263158	0.083333	0.234043	0.333333	0.645161	0.189189	0.342105	0.148936	0.340426	0.264706	0.333333	0.384615	0.46875	0.485714	0.170732	0.216216	0.15625	0.441176	0.135135	0.181818	0.1875	0.305556	0.4	0.516129	0.264706	0.40625	0.454545	0.1875	0.194444	0.142857	0.352941	0.25
0.115385	0.102564	0.205128	0.128205	0.228571	0.30303	0.186047	0.30303	0.222222	0.3	0.232558	0.294118	0.322581	0.346154	0.210526	0.15	0.264706	0.263158	1	0.137931	0.268293	0.317073	0.285714	0.407407	0.5	0.116279	0.212766	0.275862	0.151515	0.263158	0.28125	0.243243	0.235294	0.258065	0	0.228571	0.125	0.095238	0.108696	0.322581	0.194444	0.322581	0.15625	0.21875	0.272727	0.032258	0.027778	0.214286	0.212121	0.258065
0.428571	0.096774	0.1875	0.129032	0.172414	0.030303	0.05	0.133333	0.15	0.034483	0.128205	0.129032	0.032258	0	0.057143	0.027778	0.030303	0.083333	0.137931	1	0.162162	0.153846	0.058824	0.074074	0.058824	0	0.142857	0.037037	0.074074	0.147059	0.103448	0.15625	0.178571	0.071429	0.047619	0.133333	0.285714	0	0.02439	0.066667	0.096774	0	0.12	0.071429	0.03125	0.095238	0.076923	0.086957	0.033333	0.071429
0.114286	0.232558	0.425	0.2	0.65625	0.232558	0.150943	0.292683	0.382979	0.25641	0.4	0.317073	0.243902	0.25	0.333333	0.12	0.292683	0.234043	0.268293	0.162162	1	0.777778	0.25	0.2	0.410256	0.137255	0.313725	0.175	0.230769	0.288889	0.275	0.365854	0.529412	0.441176	0.025	0.261905	0.243243	0.12	0.150943	0.307692	0.261905	0.243902	0.175	0.289474	0.209302	0.05	0.068182	0.294118	0.190476	0.195122
0.108108	0.222222	0.475	0.217391	0.617647	0.341463	0.166667	0.375	0.456522	0.275	0.413043	0.4	0.358974	0.27027	0.318182	0.137255	0.341463	0.333333	0.317073	0.153846	0.777778	1	0.325581	0.25	0.390244	0.111111	0.408163	0.166667	0.219512	0.333333	0.325	0.414634	0.5	0.416667	0.02381	0.27907	0.230769	0.115385	0.145455	0.358974	0.27907	0.325	0.166667	0.307692	0.285714	0.047619	0.065217	0.277778	0.209302	0.214286
0.032258	0.210526	0.388889	0.146341	0.15	0.533333	0.173913	0.393939	0.288889	0.354839	0.333333	0.382353	0.76	0.266667	0.289474	0.195122	0.483871	0.645161	0.285714	0.058824	0.25	0.325581	1	0.205882	0.333333	0.108696	0.304348	0.290323	0.138889	0.342105	0.466667	0.361111	0.184211	0.166667	0.096774	0.352941	0.147059	0.113636	0.125	0.222222	0.314286	0.62963	0.290323	0.2	0.40625	0.09375	0.081081	0.193548	0.387097	0.2
0.086957	0.114286	0.162162	0.142857	0.258065	0.21875	0.119048	0.258065	0.133333	0.166667	0.195122	0.212121	0.233333	0.347826	0.135135	0.166667	0.147059	0.189189	0.407407	0.074074	0.2	0.25	0.205882	1	0.366667	0.128205	0.152174	0.222222	0.133333	0.189189	0.193548	0.2	0.266667	0.25	0	0.147059	0.185185	0.135135	0.119048	0.275862	0.147059	0.193548	0.222222	0.166667	0.1875	0	0.064516	0.153846	0.16129	0.129032
0.066667	0.179487	0.351351	0.205128	0.352941	0.393939	0.173913	0.352941	0.318182	0.448276	0.365854	0.382353	0.419355	0.310345	0.324324	0.166667	0.314286	0.342105	0.5	0.058824	0.410256	0.390244	0.333333	0.366667	1	0.133333	0.276596	0.25	0.242424	0.342105	0.375	0.361111	0.40625	0.354839	0.0625	0.393939	0.181818	0.166667	0.125	0.333333	0.277778	0.375	0.212121	0.3125	0.40625	0.060606	0.025641	0.321429	0.264706	0.235294
0.029412	0.324324	0.081633	0.190476	0.113636	0.166667	0.1875	0.166667	0.150943	0.125	0.134615	0.162791	0.146341	0.171429	0.238095	0.733333	0.139535	0.148936	0.116279	0	0.137255	0.111111	0.108696	0.128205	0.133333	1	0.125	0.194444	0.222222	0.255814	0.119048	0.181818	0.090909	0.125	0.088235	0.225	0.105263	0.625	0.628571	0.205128	0.195122	0.146341	0.162162	0.153846	0.230769	0.085714	0.131579	0.111111	0.15	0.25
0.073171	0.208333	0.409091	0.229167	0.26087	0.348837	0.178571	0.348837	0.372549	0.255814	0.387755	0.311111	0.333333	0.190476	0.244898	0.150943	0.348837	0.340426	0.212766	0.142857	0.313725	0.408163	0.304348	0.152174	0.276596	0.125	1	0.209302	0.177778	0.3125	0.333333	0.355556	0.266667	0.227273	0.045455	0.288889	0.186047	0.109091	0.137931	0.191489	0.288889	0.302326	0.155556	0.255814	0.23913	0.068182	0.083333	0.166667	0.195652	0.227273
0	0.117647	0.2	0.147059	0.117647	0.310345	0.179487	0.266667	0.190476	0.307692	0.230769	0.258065	0.285714	0.304348	0.205882	0.242424	0.266667	0.264706	0.275862	0.037037	0.175	0.166667	0.290323	0.222222	0.25	0.194444	0.209302	1	0.222222	0.228571	0.241379	0.242424	0.121212	0.133333	0	0.225806	0.192308	0.138889	0.121951	0.2	0.310345	0.285714	0.142857	0.172414	0.233333	0	0	0.208333	0.166667	0.214286
0	0.181818	0.228571	0.212121	0.258065	0.147059	0.205128	0.147059	0.186047	0.25	0.225	0.176471	0.15625	0.192308	0.354839	0.272727	0.181818	0.333333	0.151515	0.074074	0.230769	0.219512	0.138889	0.133333	0.242424	0.222222	0.177778	0.222222	1	0.189189	0.15625	0.235294	0.266667	0.458333	0.125	0.3	0.103448	0.235294	0.205128	0.275862	0.258065	0.121212	0.222222	0.521739	0.310345	0.166667	0.178571	0.304348	0.125	0.346154
0.060606	0.289474	0.394737	0.219512	0.25641	0.361111	0.163265	0.53125	0.386364	0.285714	0.311111	0.5625	0.382353	0.242424	0.238095	0.3	0.25641	0.384615	0.263158	0.147059	0.288889	0.333333	0.342105	0.189189	0.342105	0.255814	0.369565	0.228571	0.189189	1	0.424242	0.444444	0.263158	0.184211	0.057143	0.361111	0.272727	0.238095	0.23913	0.205128	0.324324	0.305556	0.194444	0.184211	0.333333	0.085714	0.04878	0.142857	0.243243	0.184211
0.076923	0.2	0.483871	0.228571	0.235294	0.5	0.111111	0.555556	0.421053	0.357143	0.368421	0.592593	0.538462	0.259259	0.285714	0.153846	0.354839	0.46875	0.28125	0.103448	0.275	0.325	0.466667	0.193548	0.375	0.119048	0.333333	0.241379	0.15625	0.424242	1	0.451613	0.28125	0.1875	0.034483	0.354839	0.206897	0.153846	0.111111	0.212121	0.3125	0.538462	0.241379	0.1875	0.366667	0.033333	0.028571	0.178571	0.5	0.225806
0.137931	0.305556	0.378378	0.297297	0.305556	0.382353	0.222222	0.516129	0.404762	0.387097	0.390244	0.548387	0.40625	0.21875	0.351351	0.219512	0.382353	0.485714	0.243243	0.15625	0.365854	0.414634	0.361111	0.2	0.361111	0.181818	0.355556	0.242424	0.235294	0.444444	0.451613	1	0.277778	0.228571	0.09375	0.46875	0.25	0.190476	0.195652	0.323529	0.424242	0.363636	0.205882	0.264706	0.533333	0.125	0.108108	0.151515	0.257143	0.264706
0.115385	0.30303	0.382353	0.222222	0.72	0.194444	0.085106	0.30303	0.27907	0.181818	0.325	0.294118	0.205882	0.25	0.210526	0.095238	0.194444	0.170732	0.235294	0.178571	0.529412	0.5	0.184211	0.266667	0.40625	0.090909	0.266667	0.121212	0.266667	0.263158	0.28125	0.277778	1	0.56	0.068966	0.228571	0.285714	0.121951	0.108696	0.242424	0.194444	0.138889	0.233333	0.3	0.166667	0.066667	0.027778	0.307692	0.142857	0.181818
0	0.212121	0.294118	0.138889	0.538462	0.176471	0.170732	0.142857	0.238095	0.2	0.315789	0.171429	0.1875	0.333333	0.34375	0.162162	0.290323	0.216216	0.258065	0.071429	0.441176	0.416667	0.166667	0.25	0.354839	0.125	0.227273	0.133333	0.458333	0.184211	0.1875	0.228571	0.56	1	0.076923	0.212121	0.1	0.162162	0.2	0.407407	0.212121	0.151515	0.259259	0.5	0.21875	0.115385	0.133333	0.347826	0.15625	0.285714
0	0.103448	0.058824	0.1	0.032258	0.032258	0.111111	0.032258	0.047619	0.037037	0.076923	0.064516	0.153846	0.043478	0.09375	0.09375	0.032258	0.15625	0	0.047619	0.025	0.02381	0.096774	0	0.0625	0.088235	0.045455	0	0.125	0.057143	0.034483	0.09375	0.068966	0.076923	1	0.103448	0.041667	0.09375	0.081081	0.111111	0.142857	0.071429	0.181818	0.076923	0.107143	0.75	0.238095	0	0.115385	0.076923
0.071429	0.257143	0.333333	0.216216	0.189189	0.375	0.238095	0.333333	0.333333	0.481481	0.35	0.363636	0.4	0.2	0.424242	0.236842	0.333333	0.441176	0.228571	0.133333	0.261905	0.27907	0.352941	0.147059	0.393939	0.225	0.288889	0.225806	0.3	0.361111	0.354839	0.46875	0.228571	0.212121	0.103448	1	0.15625	0.236842	0.181818	0.4	0.466667	0.3125	0.225806	0.25	0.72	0.1	0.151515	0.166667	0.322581	0.37931
0.15	0.15625	0.242424	0.266667	0.275862	0.15625	0.097561	0.275862	0.225	0.178571	0.205128	0.266667	0.166667	0.16	0.111111	0.081081	0.088235	0.135135	0.125	0.285714	0.243243	0.230769	0.147059	0.185185	0.181818	0.105263	0.186047	0.192308	0.103448	0.272727	0.206897	0.25	0.285714	0.1	0.041667	0.15625	1	0.081081	0.097561	0.09375	0.193548	0.129032	0.107143	0.137931	0.125	0.04	0	0.12	0.096774	0.1
0.03125	0.382353	0.085106	0.170732	0.146341	0.146341	0.145833	0.205128	0.134615	0.162162	0.14	0.170732	0.153846	0.181818	0.219512	0.666667	0.146341	0.181818	0.095238	0	0.12	0.115385	0.113636	0.135135	0.166667	0.625	0.109091	0.138889	0.235294	0.238095	0.153846	0.190476	0.121951	0.162162	0.09375	0.236842	0.081081	1	0.617647	0.216216	0.205128	0.184211	0.205882	0.162162	0.243243	0.090909	0.108108	0.151515	0.189189	0.194444
0.027027	0.3	0.12	0.177778	0.130435	0.130435	0.176471	0.130435	0.142857	0.090909	0.192308	0.177778	0.136364	0.157895	0.27907	0.571429	0.181818	0.1875	0.108696	0.02439	0.150943	0.145455	0.125	0.119048	0.125	0.628571	0.137931	0.121951	0.205128	0.23913	0.111111	0.195652	0.108696	0.2	0.081081	0.181818	0.097561	0.617647	1	0.25	0.155556	0.162791	0.179487	0.2	0.186047	0.078947	0.121951	0.131579	0.166667	0.230769
0	0.166667	0.210526	0.194444	0.272727	0.235294	0.25	0.2	0.285714	0.1875	0.268293	0.228571	0.25	0.36	0.285714	0.25	0.3125	0.305556	0.322581	0.066667	0.307692	0.358974	0.222222	0.275862	0.333333	0.205128	0.191489	0.2	0.275862	0.205128	0.212121	0.323529	0.242424	0.407407	0.111111	0.4	0.09375	0.216216	0.25	1	0.272727	0.212121	0.16129	0.310345	0.366667	0.107143	0.125	0.222222	0.181818	0.407407
0.111111	0.294118	0.263158	0.25	0.222222	0.375	0.268293	0.333333	0.302326	0.290323	0.285714	0.363636	0.354839	0.241379	0.305556	0.205128	0.257143	0.4	0.194444	0.096774	0.261905	0.27907	0.314286	0.147059	0.277778	0.195122	0.288889	0.310345	0.258065	0.324324	0.3125	0.424242	0.194444	0.212121	0.142857	0.466667	0.193548	0.205128	0.155556	0.272727	1	0.354839	0.310345	0.212121	0.387097	0.178571	0.151515	0.166667	0.322581	0.290323
0.037037	0.2	0.352941	0.194444	0.166667	0.555556	0.162791	0.448276	0.285714	0.357143	0.3	0.482759	0.73913	0.307692	0.285714	0.184211	0.354839	0.516129	0.322581	0	0.243902	0.325	0.62963	0.193548	0.375	0.146341	0.302326	0.285714	0.121212	0.305556	0.538462	0.363636	0.138889	0.151515	0.071429	0.3125	0.129032	0.184211	0.162791	0.212121	0.354839	1	0.333333	0.1875	0.366667	0.068966	0.090909	0.222222	0.56	0.225806
0.090909	0.266667	0.2	0.181818	0.225806	0.266667	0.15	0.225806	0.162791	0.172414	0.170732	0.21875	0.333333	0.2	0.205882	0.205882	0.225806	0.264706	0.15625	0.12	0.175	0.166667	0.290323	0.222222	0.212121	0.162162	0.155556	0.142857	0.222222	0.194444	0.241379	0.205882	0.233333	0.259259	0.181818	0.225806	0.107143	0.205882	0.179487	0.16129	0.310345	0.333333	1	0.259259	0.193548	0.227273	0.391304	0.26087	0.346154	0.172414
0	0.212121	0.333333	0.171429	0.290323	0.212121	0.170732	0.142857	0.268293	0.2	0.315789	0.171429	0.225806	0.230769	0.387097	0.228571	0.333333	0.40625	0.21875	0.071429	0.289474	0.307692	0.2	0.166667	0.3125	0.153846	0.255814	0.172414	0.521739	0.184211	0.1875	0.264706	0.3	0.5	0.076923	0.25	0.137931	0.162162	0.2	0.310345	0.212121	0.1875	0.259259	1	0.258065	0.115385	0.172414	0.347826	0.15625	0.285714
0	0.194444	0.305556	0.157895	0.131579	0.387097	0.243902	0.387097	0.309524	0.5	0.325	0.419355	0.413793	0.296296	0.4375	0.277778	0.387097	0.454545	0.272727	0.03125	0.209302	0.285714	0.40625	0.1875	0.40625	0.230769	0.266667	0.233333	0.310345	0.333333	0.366667	0.533333	0.166667	0.21875	0.107143	0.72	0.125	0.243243	0.186047	0.366667	0.387097	0.366667	0.193548	0.258065	1	0.103448	0.15625	0.172414	0.333333	0.344828
0	0.1	0.057143	0.133333	0.03125	0.03125	0.108108	0.03125	0.071429	0.035714	0.075	0.0625	0.148148	0.041667	0.090909	0.125	0.064516	0.1875	0.032258	0.095238	0.05	0.047619	0.09375	0	0.060606	0.085714	0.068182	0	0.166667	0.085714	0.033333	0.125	0.066667	0.115385	0.75	0.1	0.04	0.090909	0.078947	0.107143	0.178571	0.068966	0.227273	0.115385	0.103448	1	0.285714	0.043478	0.111111	0.115385
0.043478	0.055556	0.076923	0.083333	0.027027	0.027027	0.179487	0.027027	0.086957	0	0.090909	0.054054	0.090909	0.034483	0.108108	0.138889	0.117647	0.194444	0.027778	0.076923	0.068182	0.065217	0.081081	0.064516	0.025641	0.131579	0.083333	0	0.178571	0.04878	0.028571	0.108108	0.027778	0.133333	0.238095	0.151515	0	0.108108	0.121951	0.125	0.151515	0.090909	0.391304	0.172414	0.15625	0.285714	1	0.035714	0.09375	0.133333
0	0.206897	0.21875	0.090909	0.346154	0.206897	0.102564	0.166667	0.175	0.347826	0.25	0.16129	0.222222	0.173913	0.310345	0.117647	0.25	0.142857	0.214286	0.086957	0.294118	0.277778	0.193548	0.153846	0.321429	0.111111	0.166667	0.208333	0.304348	0.142857	0.178571	0.151515	0.307692	0.347826	0	0.166667	0.12	0.151515	0.131579	0.222222	0.166667	0.222222	0.26087	0.347826	0.172414	0.043478	0.035714	1	0.230769	0.24
0.038462	0.171429	0.323529	0.135135	0.138889	0.366667	0.113636	0.366667	0.232558	0.37037	0.186047	0.354839	0.444444	0.178571	0.333333	0.157895	0.366667	0.352941	0.212121	0.033333	0.190476	0.209302	0.387097	0.16129	0.264706	0.15	0.195652	0.166667	0.125	0.243243	0.5	0.257143	0.142857	0.15625	0.115385	0.322581	0.096774	0.189189	0.166667	0.181818	0.322581	0.56	0.346154	0.15625	0.333333	0.111111	0.09375	0.230769	1	0.233333
0	0.176471	0.257143	0.242424	0.176471	0.212121	0.2	0.176471	0.209302	0.2	0.25	0.205882	0.225806	0.28	0.30303	0.264706	0.290323	0.25	0.258065	0.071429	0.195122	0.214286	0.2	0.129032	0.235294	0.25	0.227273	0.214286	0.346154	0.184211	0.225806	0.264706	0.181818	0.285714	0.076923	0.37931	0.1	0.194444	0.230769	0.407407	0.290323	0.225806	0.172414	0.285714	0.344828	0.115385	0.133333	0.24	0.233333	1
0	0.083333	0.162162	0.111111	0.21875	0.21875	0.175	0.21875	0.133333	0.206897	0.195122	0.212121	0.233333	0.47619	0.2	0.135135	0.181818	0.189189	0.461538	0.035714	0.230769	0.25	0.205882	0.7	0.366667	0.128205	0.152174	0.269231	0.133333	0.189189	0.193548	0.2	0.225806	0.25	0	0.147059	0.185185	0.105263	0.093023	0.321429	0.181818	0.233333	0.1	0.166667	0.225806	0	0	0.153846	0.16129	0.166667
0.075	0.266667	0.487805	0.208333	0.266667	0.295455	0.203704	0.357143	0.5	0.261905	0.425532	0.380952	0.309524	0.139535	0.363636	0.176471	0.357143	0.319149	0.166667	0.146341	0.32	0.36	0.282609	0.106383	0.255319	0.169811	0.365385	0.133333	0.209302	0.319149	0.309524	0.395349	0.244444	0.204545	0.071429	0.425	0.190476	0.176471	0.226415	0.25	0.295455	0.27907	0.186047	0.232558	0.365854	0.069767	0.085106	0.142857	0.317073	0.261905
0	0.178571	0.088235	0.0625	0.03125	0.064516	0.138889	0.03125	0.097561	0.035714	0.162162	0.0625	0.068966	0.086957	0.2	0.285714	0.137931	0.151515	0.103448	0.095238	0.076923	0.1	0.060606	0.076923	0.09375	0.1875	0.068182	0.08	0.166667	0.151515	0.033333	0.125	0.032258	0.16	0.166667	0.137931	0.04	0.2	0.242424	0.192308	0.1	0.033333	0.038462	0.26087	0.185185	0.157895	0.173913	0.090909	0	0.115385
0	0.125	0.111111	0.193548	0.090909	0.2	0.419355	0.125	0.142857	0.142857	0.15	0.15625	0.214286	0.217391	0.21875	0.21875	0.16129	0.205882	0.129032	0	0.153846	0.119048	0.151515	0.107143	0.151515	0.205882	0.136364	0.2	0.24	0.171429	0.133333	0.181818	0.09375	0.142857	0.2	0.241379	0.115385	0.181818	0.157895	0.259259	0.333333	0.172414	0.2	0.142857	0.25	0.190476	0.2	0.08	0.137931	0.230769
0	0.184211	0.289474	0.15	0.184211	0.363636	0.232558	0.25	0.266667	0.366667	0.25	0.277778	0.30303	0.233333	0.371429	0.2	0.323529	0.351351	0.222222	0.029412	0.255814	0.272727	0.27027	0.142857	0.342857	0.190476	0.311111	0.3	0.333333	0.315789	0.264706	0.297297	0.189189	0.242424	0.064516	0.363636	0.117647	0.170732	0.177778	0.264706	0.323529	0.264706	0.21875	0.28125	0.333333	0.096774	0.083333	0.241379	0.272727	0.28125
0.038462	0.205882	0.323529	0.166667	0.205882	0.366667	0.195122	0.366667	0.261905	0.761905	0.275	0.354839	0.444444	0.222222	0.419355	0.128205	0.28125	0.352941	0.290323	0.068966	0.282051	0.3	0.387097	0.2	0.482759	0.121951	0.27907	0.296296	0.241379	0.314286	0.392857	0.375	0.212121	0.193548	0.074074	0.518519	0.214286	0.157895	0.088889	0.181818	0.366667	0.444444	0.25	0.193548	0.481481	0.071429	0.060606	0.333333	0.461538	0.193548
0	0.392857	0.194444	0.081081	0.147059	0.181818	0.119048	0.147059	0.159091	0.206897	0.195122	0.142857	0.193548	0.148148	0.235294	0.354839	0.258065	0.189189	0.1875	0.074074	0.142857	0.136364	0.205882	0.133333	0.171429	0.294118	0.152174	0.222222	0.214286	0.222222	0.15625	0.166667	0.151515	0.25	0	0.21875	0.142857	0.354839	0.342857	0.193548	0.181818	0.193548	0.269231	0.296296	0.1875	0.037037	0.064516	0.304348	0.2	0.25
0.071429	0.157895	0.066667	0.184211	0.157895	0.047619	0.130435	0.047619	0.076923	0.025641	0.173913	0.046512	0.05	0.090909	0.146341	0.119048	0.047619	0.088889	0.162162	0.133333	0.152174	0.145833	0.045455	0.147059	0.15	0.139535	0.137255	0.027027	0.147059	0.042553	0.05	0.119048	0.131579	0.176471	0.142857	0.128205	0.057143	0.119048	0.155556	0.2	0.1	0.02439	0.085714	0.111111	0.102564	0.137931	0.117647	0.060606	0.025	0.111111
0	0.16129	0.142857	0.15625	0.241379	0.241379	0.157895	0.241379	0.170732	0.28	0.15	0.193548	0.214286	0.4	0.258065	0.181818	0.2	0.205882	0.4	0.083333	0.25	0.205128	0.1875	0.347826	0.357143	0.205882	0.162791	0.363636	0.24	0.205882	0.214286	0.21875	0.25	0.28	0	0.241379	0.16	0.181818	0.128205	0.36	0.285714	0.214286	0.25	0.230769	0.25	0.041667	0.034483	0.285714	0.222222	0.230769
0.125	0.103448	0.058824	0.1	0.066667	0.066667	0.111111	0.066667	0.073171	0	0.076923	0.1	0.153846	0.043478	0.060606	0.129032	0.066667	0.193548	0.033333	0.157895	0.078947	0.075	0.133333	0.038462	0.0625	0.088235	0.069767	0	0.125	0.088235	0.034483	0.09375	0.068966	0.12	0.333333	0.103448	0.041667	0.09375	0.081081	0.071429	0.185185	0.111111	0.368421	0.12	0.068966	0.4	0.444444	0.045455	0.115385	0.076923
0	0	0.064516	0	0	0.035714	0	0.035714	0.025	0	0.054054	0.034483	0.038462	0.05	0.032258	0.066667	0.16	0.0625	0.037037	0	0	0.025641	0.192308	0.043478	0.033333	0.030303	0.04878	0.095238	0	0.030303	0.038462	0	0	0	0	0.035714	0	0	0.027778	0	0	0.038462	0	0.041667	0.076923	0	0.045455	0	0	0.041667
0	0	0.058824	0.03125	0	0.032258	0	0.032258	0.047619	0	0.076923	0.03125	0.034483	0.043478	0.060606	0.060606	0.185185	0.057143	0.033333	0	0	0.04878	0.133333	0.038462	0.030303	0.027778	0.069767	0.083333	0	0.027778	0.034483	0	0	0	0	0.032258	0	0	0.052632	0	0	0.034483	0	0.037037	0.068966	0	0.04	0	0	0.076923
0	0.034483	0.0625	0.068966	0.034483	0.071429	0.027027	0.034483	0.076923	0	0.111111	0.068966	0.076923	0.1	0.064516	0.1	0.153846	0.09375	0.035714	0	0.026316	0.078947	0.142857	0.041667	0.066667	0.060606	0.073171	0.090909	0.041667	0.060606	0.037037	0.03125	0.035714	0.04	0.058824	0.071429	0	0.03125	0.085714	0.037037	0.034483	0.037037	0.043478	0.083333	0.115385	0.055556	0.090909	0	0	0.083333
0	0	0.058824	0.03125	0	0.032258	0	0.032258	0.047619	0	0.076923	0.03125	0.034483	0.043478	0.060606	0.060606	0.230769	0.057143	0.033333	0	0	0.04878	0.172414	0.038462	0.030303	0.027778	0.069767	0.083333	0	0.027778	0.034483	0	0	0	0	0.032258	0	0	0.025641	0	0	0.034483	0	0.037037	0.068966	0	0.04	0	0	0.076923
0	0	0.058824	0.03125	0	0.032258	0	0.032258	0.047619	0	0.076923	0.03125	0.034483	0.043478	0.060606	0.060606	0.230769	0.057143	0.033333	0	0	0.04878	0.172414	0.038462	0.030303	0.027778	0.069767	0.083333	0	0.027778	0.034483	0	0	0	0	0.032258	0	0	0.025641	0	0	0.034483	0	0.037037	0.068966	0	0.04	0	0	0.076923
0	0	0.085714	0.029412	0	0.030303	0.02439	0.030303	0.045455	0	0.1	0.029412	0.032258	0.04	0.057143	0.088235	0.172414	0.083333	0.064516	0.043478	0.02381	0.046512	0.16129	0.035714	0.028571	0.026316	0.090909	0.076923	0.035714	0.054054	0.032258	0.027778	0	0.034483	0	0.030303	0	0	0.05	0.032258	0.030303	0.032258	0.037037	0.071429	0.064516	0.045455	0.076923	0.041667	0	0.071429
0	0.333333	0.257143	0.171429	0.176471	0.333333	0.170732	0.25	0.238095	0.285714	0.25	0.28125	0.357143	0.230769	0.34375	0.30303	0.37931	0.323529	0.21875	0.034483	0.25641	0.243902	0.3125	0.129032	0.272727	0.285714	0.255814	0.214286	0.25	0.323529	0.266667	0.30303	0.181818	0.285714	0.076923	0.333333	0.1	0.30303	0.263158	0.266667	0.333333	0.310345	0.307692	0.285714	0.344828	0.115385	0.133333	0.24	0.321429	0.285714
0	0.206897	0.147059	0.241379	0.166667	0.166667	0.228571	0.166667	0.146341	0.192308	0.153846	0.2	0.178571	0.227273	0.357143	0.357143	0.206897	0.212121	0.133333	0	0.128205	0.121951	0.121212	0.153846	0.193548	0.333333	0.113636	0.26087	0.363636	0.176471	0.178571	0.225806	0.133333	0.192308	0.15	0.346154	0.12	0.310345	0.264706	0.32	0.25	0.178571	0.208333	0.24	0.36	0.142857	0.16	0.181818	0.185185	0.347826
0.033333	0.184211	0.324324	0.179487	0.184211	0.8	0.232558	0.451613	0.325581	0.366667	0.309524	0.483871	0.592593	0.321429	0.263158	0.2	0.363636	0.5625	0.294118	0.029412	0.227273	0.302326	0.516129	0.212121	0.382353	0.162791	0.340909	0.344828	0.176471	0.388889	0.535714	0.411765	0.157895	0.171429	0.03125	0.363636	0.151515	0.170732	0.12766	0.228571	0.40625	0.482759	0.21875	0.205882	0.419355	0.030303	0.026316	0.16129	0.354839	0.205882
0	0.36	0.225806	0.166667	0.259259	0.214286	0.135135	0.172414	0.179487	0.2	0.189189	0.206897	0.230769	0.3	0.233333	0.275862	0.259259	0.21875	0.178571	0.090909	0.194444	0.184211	0.2	0.16	0.2	0.21875	0.170732	0.166667	0.26087	0.3	0.230769	0.193548	0.222222	0.363636	0.047619	0.172414	0.173913	0.275862	0.235294	0.230769	0.172414	0.185185	0.333333	0.428571	0.178571	0.095238	0.076923	0.315789	0.192308	0.2
0	0.225806	0.235294	0.181818	0.266667	0.1875	0.179487	0.1875	0.219512	0.307692	0.263158	0.21875	0.2	0.25	0.366667	0.242424	0.266667	0.264706	0.193548	0.037037	0.305556	0.289474	0.176471	0.137931	0.290323	0.228571	0.181818	0.185185	0.571429	0.194444	0.2	0.28125	0.275862	0.478261	0.130435	0.310345	0.068966	0.242424	0.243243	0.285714	0.310345	0.16129	0.28	0.416667	0.321429	0.173913	0.185185	0.380952	0.166667	0.36
0.076923	0.191489	0.578947	0.163265	0.244444	0.333333	0.230769	0.435897	0.658537	0.238095	0.434783	0.425	0.317073	0.2	0.282609	0.156863	0.333333	0.355556	0.195652	0.15	0.326531	0.367347	0.348837	0.133333	0.288889	0.12963	0.372549	0.190476	0.159091	0.386364	0.421053	0.404762	0.25	0.209302	0.047619	0.302326	0.195122	0.113208	0.142857	0.173913	0.333333	0.317073	0.190476	0.209302	0.27907	0.071429	0.086957	0.119048	0.261905	0.181818
0.12	0.3125	0.314286	0.30303	0.272727	0.354839	0.190476	0.5	0.35	0.407407	0.3	0.535714	0.37931	0.214286	0.323529	0.184211	0.272727	0.382353	0.242424	0.103448	0.307692	0.325	0.333333	0.15625	0.375	0.205128	0.272727	0.285714	0.193548	0.46875	0.428571	0.451613	0.28125	0.151515	0.071429	0.448276	0.296296	0.216216	0.136364	0.212121	0.448276	0.333333	0.241379	0.151515	0.413793	0.068966	0.028571	0.178571	0.3	0.225806
0.136364	0.258065	0.264706	0.212121	0.3	0.21875	0.175	0.21875	0.214286	0.166667	0.225	0.25	0.321429	0.24	0.2	0.2	0.21875	0.294118	0.151515	0.208333	0.230769	0.219512	0.28125	0.172414	0.205882	0.157895	0.204545	0.137931	0.214286	0.257143	0.275862	0.235294	0.266667	0.296296	0.173913	0.21875	0.230769	0.166667	0.146341	0.193548	0.3	0.275862	0.571429	0.346154	0.151515	0.217391	0.32	0.25	0.285714	0.166667
0.076923	0.272727	0.276596	0.1875	0.555556	0.166667	0.163636	0.217391	0.307692	0.155556	0.346939	0.23913	0.2	0.2	0.255319	0.204082	0.166667	0.244898	0.170213	0.15	0.585366	0.55814	0.183673	0.186047	0.288889	0.173077	0.272727	0.086957	0.243902	0.244898	0.2	0.255319	0.447368	0.405405	0.128205	0.244444	0.166667	0.18	0.207547	0.285714	0.244444	0.173913	0.25	0.333333	0.170213	0.153846	0.162791	0.27027	0.177778	0.209302
0.171429	0.222222	0.372093	0.191489	0.341463	0.309524	0.188679	0.410256	0.395833	0.342105	0.413043	0.435897	0.325	0.175	0.380952	0.183673	0.309524	0.395349	0.285714	0.25	0.361702	0.434783	0.295455	0.136364	0.357143	0.176471	0.326923	0.195122	0.315789	0.395349	0.325	0.487179	0.317073	0.275	0.075	0.410256	0.230769	0.183673	0.188679	0.292683	0.309524	0.261905	0.195122	0.275	0.384615	0.1	0.113636	0.210526	0.209302	0.307692
0.075	0.075472	0.12963	0.137255	0.1875	0.017857	0.031746	0.096154	0.095238	0.019231	0.116667	0.074074	0.018519	0.042553	0.034483	0.034483	0.036364	0.050847	0.12	0.175	0.2	0.192982	0.035088	0.083333	0.113208	0.033333	0.163934	0.040816	0.04	0.127273	0.057692	0.090909	0.191489	0.12766	0.022727	0.075472	0.162791	0.016949	0.031746	0.078431	0.055556	0.018519	0.040816	0.081633	0.018182	0.022222	0.040816	0.066667	0.018868	0.06
0.166667	0.206897	0.114286	0.2	0.206897	0.09375	0.102564	0.129032	0.146341	0	0.184211	0.16129	0.1	0.08	0.117647	0.1875	0.09375	0.111111	0.0625	0.136364	0.157895	0.179487	0.057143	0.071429	0.121212	0.142857	0.139535	0.035714	0.153846	0.142857	0.137931	0.151515	0.172414	0.107143	0.210526	0.166667	0.12	0.151515	0.131579	0.137931	0.166667	0.064516	0.115385	0.148148	0.133333	0.2	0.16	0.04	0.032258	0.107143
0.022222	0.304348	0.230769	0.12963	0.2	0.25	0.192982	0.25	0.263158	0.272727	0.296296	0.244898	0.26087	0.181818	0.340426	0.536585	0.304348	0.326531	0.255319	0.06383	0.277778	0.290909	0.24	0.195652	0.319149	0.444444	0.254237	0.173913	0.222222	0.326531	0.26087	0.285714	0.18	0.272727	0.066667	0.363636	0.081633	0.465116	0.478261	0.318182	0.25	0.26087	0.2	0.244444	0.340909	0.088889	0.125	0.159091	0.295455	0.244444
0.027027	0.268293	0.333333	0.204545	0.181818	0.3	0.25	0.268293	0.361702	0.297297	0.377778	0.292683	0.388889	0.222222	0.410256	0.27907	0.444444	0.461538	0.214286	0.02439	0.244898	0.3125	0.384615	0.146341	0.317073	0.266667	0.32	0.210526	0.236842	0.325581	0.315789	0.410256	0.159091	0.230769	0.142857	0.444444	0.097561	0.27907	0.276596	0.315789	0.333333	0.388889	0.210526	0.333333	0.5	0.138889	0.15	0.131579	0.324324	0.263158
0.023256	0.318182	0.24	0.156863	0.137255	0.26087	0.2	0.234043	0.272727	0.2	0.259259	0.255319	0.272727	0.136364	0.355556	0.564103	0.318182	0.340426	0.212766	0.043478	0.218182	0.254545	0.276596	0.12766	0.25	0.5	0.220339	0.155556	0.232558	0.3125	0.244444	0.297872	0.117647	0.2	0.069767	0.288889	0.108696	0.564103	0.65	0.244444	0.234043	0.302326	0.181818	0.255814	0.325581	0.068182	0.106383	0.166667	0.309524	0.255814
0.028571	0.351351	0.102041	0.159091	0.136364	0.136364	0.16	0.190476	0.148148	0.15	0.153846	0.159091	0.142857	0.166667	0.232558	0.65625	0.162791	0.195652	0.113636	0.025641	0.134615	0.12963	0.130435	0.125	0.155556	0.666667	0.122807	0.128205	0.25	0.222222	0.142857	0.204545	0.113636	0.179487	0.085714	0.282051	0.075	0.827586	0.705882	0.230769	0.219512	0.170732	0.189189	0.179487	0.289474	0.083333	0.157895	0.138889	0.175	0.243243
0	0.12	0.276596	0.163265	0.12	0.244444	0.230769	0.244444	0.283019	0.238095	0.375	0.266667	0.255814	0.170732	0.340909	0.18	0.333333	0.355556	0.222222	0.045455	0.203704	0.288462	0.26087	0.133333	0.26087	0.196078	0.25	0.162791	0.214286	0.22	0.227273	0.340909	0.1	0.181818	0.073171	0.365854	0.088889	0.18	0.254902	0.317073	0.244444	0.227273	0.111111	0.268293	0.375	0.071429	0.086957	0.119048	0.177778	0.268293
0.030303	0.371429	0.106383	0.166667	0.142857	0.142857	0.142857	0.142857	0.132075	0.1	0.16	0.195122	0.15	0.176471	0.214286	0.758621	0.170732	0.177778	0.119048	0.027027	0.14	0.134615	0.136364	0.131579	0.136364	0.65625	0.127273	0.135135	0.228571	0.292683	0.121951	0.186047	0.119048	0.189189	0.090909	0.2	0.108108	0.758621	0.75	0.243243	0.170732	0.179487	0.235294	0.189189	0.205128	0.121212	0.135135	0.147059	0.184211	0.222222
0.088235	0.275	0.410256	0.238095	0.243902	0.342105	0.134615	0.378378	0.369565	0.305556	0.386364	0.405405	0.361111	0.162162	0.384615	0.173913	0.416667	0.365854	0.219512	0.171429	0.304348	0.347826	0.325	0.15	0.292683	0.142857	0.382979	0.153846	0.243243	0.333333	0.4	0.421053	0.25	0.205128	0.083333	0.457143	0.222222	0.173913	0.229167	0.25641	0.342105	0.289474	0.216216	0.27027	0.428571	0.081081	0.097561	0.2	0.333333	0.382353
0	0.133333	0.266667	0.166667	0.172414	0.214286	0.166667	0.214286	0.210526	0.25	0.189189	0.206897	0.230769	0.3	0.193548	0.193548	0.259259	0.258065	0.269231	0.090909	0.194444	0.216216	0.285714	0.318182	0.241379	0.114286	0.170732	0.272727	0.208333	0.21875	0.230769	0.233333	0.178571	0.25	0	0.214286	0.173913	0.15625	0.166667	0.28	0.214286	0.230769	0.217391	0.304348	0.269231	0.045455	0.076923	0.315789	0.192308	0.25
0	0.148936	0.318182	0.170213	0.148936	0.285714	0.291667	0.255814	0.32	0.315789	0.333333	0.27907	0.268293	0.179487	0.390244	0.212766	0.421053	0.439024	0.204545	0.047619	0.211538	0.27451	0.302326	0.113636	0.333333	0.18	0.307692	0.230769	0.361111	0.255319	0.268293	0.357143	0.152174	0.282051	0.076923	0.384615	0.093023	0.1875	0.192308	0.3	0.285714	0.238095	0.170732	0.388889	0.394737	0.102564	0.142857	0.184211	0.186047	0.282051
0.212121	0.2	0.26087	0.222222	0.35	0.173913	0.087719	0.227273	0.245283	0.136364	0.361702	0.222222	0.181818	0.179487	0.163265	0.163265	0.255814	0.229167	0.232558	0.222222	0.3125	0.326531	0.272727	0.195122	0.217391	0.113208	0.283019	0.142857	0.225	0.204082	0.181818	0.295455	0.292683	0.25	0.02439	0.2	0.175	0.14	0.169811	0.209302	0.227273	0.155556	0.170732	0.282051	0.177778	0.04878	0.090909	0.184211	0.108696	0.25
0	0.2	0.176471	0.193548	0.16129	0.2	0.222222	0.2	0.2	0.230769	0.243243	0.233333	0.214286	0.272727	0.3	0.3	0.285714	0.28125	0.25	0.083333	0.153846	0.175	0.1875	0.24	0.266667	0.242424	0.190476	0.304348	0.47619	0.205882	0.214286	0.258065	0.166667	0.28	0.142857	0.333333	0.16	0.21875	0.222222	0.259259	0.285714	0.172414	0.2	0.333333	0.4	0.136364	0.2	0.227273	0.137931	0.333333
0	0.170732	0.405405	0.166667	0.2	0.371429	0.142857	0.297297	0.395349	0.375	0.380952	0.324324	0.393939	0.212121	0.457143	0.186047	0.454545	0.394737	0.27027	0.055556	0.295455	0.372093	0.351351	0.131579	0.388889	0.152174	0.319149	0.2	0.30303	0.292683	0.393939	0.307692	0.205128	0.294118	0.028571	0.454545	0.078947	0.159091	0.191489	0.314286	0.297297	0.393939	0.235294	0.375	0.46875	0.057143	0.105263	0.3	0.363636	0.419355
0.125	0.204082	0.285714	0.276596	0.204082	0.204082	0.135593	0.255319	0.267857	0.170213	0.301887	0.276596	0.212766	0.186047	0.192308	0.127273	0.229167	0.207547	0.234043	0.166667	0.236364	0.25	0.196078	0.125	0.22	0.142857	0.258621	0.152174	0.148936	0.28	0.266667	0.319149	0.208333	0.145833	0.044444	0.255319	0.181818	0.107143	0.155172	0.212766	0.229167	0.1875	0.12766	0.145833	0.208333	0.066667	0.06	0.111111	0.166667	0.25
0	0.159091	0.341463	0.130435	0.275	0.275	0.204082	0.214286	0.340426	0.205128	0.326087	0.238095	0.289474	0.228571	0.35	0.173913	0.416667	0.333333	0.282051	0.051282	0.363636	0.377778	0.261905	0.243243	0.358974	0.142857	0.3	0.153846	0.243243	0.191489	0.25641	0.317073	0.25	0.342857	0.083333	0.342105	0.073171	0.148936	0.204082	0.441176	0.243902	0.25641	0.153846	0.305556	0.315789	0.081081	0.097561	0.2	0.263158	0.305556
0.046154	0.093333	0.228571	0.092105	0.15493	0.15493	0.139241	0.123288	0.160494	0.114286	0.194805	0.136986	0.15942	0.121212	0.231884	0.118421	0.223881	0.191781	0.191176	0.058824	0.197368	0.207792	0.150685	0.132353	0.2	0.115385	0.170732	0.085714	0.166667	0.12987	0.15942	0.180556	0.140845	0.2	0.044776	0.188406	0.041667	0.103896	0.139241	0.19403	0.138889	0.15942	0.101449	0.181818	0.173913	0.059701	0.085714	0.089552	0.161765	0.181818
0	0.025641	0.157895	0.108108	0.142857	0.111111	0.142857	0.142857	0.130435	0.2	0.25	0.138889	0.117647	0.185185	0.131579	0.102564	0.142857	0.153846	0.181818	0.034483	0.166667	0.159091	0.135135	0.206897	0.235294	0.097561	0.148936	0.36	0.166667	0.125	0.117647	0.102564	0.147059	0.16129	0	0.111111	0.222222	0.075	0.066667	0.117647	0.081081	0.117647	0.030303	0.241379	0.147059	0	0	0.192308	0.057143	0.090909
0.060606	0.166667	0.232558	0.111111	0.225	0.289474	0.163265	0.289474	0.22	0.285714	0.282609	0.282051	0.305556	0.28125	0.268293	0.155556	0.4	0.255814	0.454545	0.054054	0.288889	0.304348	0.416667	0.517241	0.416667	0.102041	0.211538	0.228571	0.128205	0.227273	0.27027	0.3	0.2	0.216216	0	0.225	0.105263	0.130435	0.117647	0.27027	0.25641	0.342857	0.228571	0.184211	0.297297	0.027027	0.075	0.25	0.277778	0.184211
0	0.142857	0.268293	0.088889	0.2	0.371429	0.191489	0.297297	0.276596	0.294118	0.288889	0.289474	0.352941	0.37931	0.307692	0.133333	0.333333	0.292683	0.516129	0.055556	0.295455	0.340909	0.351351	0.482759	0.428571	0.104167	0.24	0.272727	0.162162	0.261905	0.277778	0.307692	0.205128	0.257143	0	0.263158	0.138889	0.108696	0.12	0.277778	0.263158	0.352941	0.2	0.222222	0.342857	0.027778	0.05	0.258065	0.25	0.222222
0.076923	0.105263	0.179487	0.131579	0.235294	0.166667	0.111111	0.2	0.125	0.151515	0.181818	0.162162	0.176471	0.307692	0.125	0.153846	0.235294	0.175	0.322581	0.066667	0.186047	0.204545	0.294118	0.761905	0.294118	0.119048	0.142857	0.241379	0.121212	0.146341	0.176471	0.184211	0.242424	0.225806	0	0.135135	0.166667	0.125	0.111111	0.25	0.135135	0.176471	0.2	0.151515	0.171429	0	0.058824	0.137931	0.147059	0.117647
0.076923	0.166667	0.179487	0.194444	0.272727	0.2	0.162791	0.2	0.148936	0.1875	0.238095	0.228571	0.212121	0.36	0.184211	0.216216	0.2	0.205128	0.413793	0.066667	0.214286	0.261905	0.189189	0.681818	0.375	0.146341	0.191489	0.241379	0.193548	0.205128	0.176471	0.25	0.242424	0.310345	0.071429	0.166667	0.129032	0.153846	0.162791	0.333333	0.2	0.212121	0.16129	0.225806	0.242424	0.107143	0.090909	0.137931	0.147059	0.1875
0.076923	0.105263	0.15	0.131579	0.235294	0.166667	0.111111	0.2	0.125	0.151515	0.209302	0.162162	0.176471	0.307692	0.153846	0.184211	0.2	0.175	0.366667	0.032258	0.186047	0.232558	0.222222	0.761905	0.333333	0.146341	0.142857	0.241379	0.121212	0.146341	0.142857	0.184211	0.205882	0.225806	0	0.135135	0.129032	0.125	0.136364	0.25	0.135135	0.212121	0.16129	0.151515	0.205882	0	0.090909	0.137931	0.147059	0.151515
0.142857	0.393939	0.282051	0.342857	0.393939	0.243243	0.148936	0.277778	0.288889	0.235294	0.365854	0.305556	0.294118	0.225806	0.25641	0.195122	0.210526	0.243902	0.184211	0.125	0.375	0.357143	0.230769	0.171429	0.333333	0.214286	0.276596	0.25	0.28125	0.342105	0.257143	0.361111	0.363636	0.272727	0.096774	0.277778	0.258065	0.195122	0.148936	0.257143	0.393939	0.222222	0.212121	0.3125	0.25	0.09375	0.052632	0.275862	0.162162	0.272727
0.1	0.27027	0.275	0.263158	0.205128	0.382353	0.25	0.342857	0.311111	0.264706	0.295455	0.371429	0.363636	0.258065	0.282051	0.219512	0.27027	0.405405	0.210526	0.088235	0.244444	0.26087	0.324324	0.166667	0.289474	0.181818	0.297872	0.322581	0.235294	0.333333	0.323529	0.388889	0.179487	0.194444	0.129032	0.424242	0.212121	0.219512	0.170213	0.25	0.88	0.363636	0.28125	0.228571	0.393939	0.16129	0.138889	0.151515	0.294118	0.264706
0.1	0.175	0.307692	0.2	0.146341	0.46875	0.145833	0.382353	0.255319	0.30303	0.266667	0.411765	0.607143	0.258065	0.25	0.162791	0.305556	0.444444	0.314286	0.057143	0.217391	0.288889	0.53125	0.166667	0.324324	0.130435	0.270833	0.242424	0.105263	0.268293	0.451613	0.315789	0.121951	0.131579	0.060606	0.27027	0.142857	0.190476	0.170213	0.184211	0.305556	0.730769	0.28125	0.162162	0.314286	0.058824	0.078947	0.1875	0.466667	0.194444
0.034483	0.257143	0.297297	0.25	0.189189	0.375	0.238095	0.333333	0.244444	0.25	0.255814	0.363636	0.4	0.285714	0.236842	0.305556	0.257143	0.4	0.228571	0.0625	0.261905	0.27907	0.352941	0.21875	0.314286	0.25641	0.26087	0.266667	0.21875	0.484848	0.3125	0.342857	0.194444	0.212121	0.185185	0.333333	0.193548	0.27027	0.238095	0.272727	0.375	0.3125	0.310345	0.25	0.34375	0.222222	0.151515	0.129032	0.242424	0.25
0	0.033333	0.09375	0.066667	0.033333	0.068966	0.026316	0.033333	0.04878	0	0.051282	0.066667	0.074074	0.095238	0.0625	0.096774	0.068966	0.090909	0.071429	0.05	0.025641	0.05	0.1	0.04	0.064516	0.028571	0.046512	0.041667	0.083333	0.090909	0.074074	0.030303	0.034483	0.08	0.055556	0.033333	0	0.030303	0.026316	0.035714	0.033333	0.074074	0.086957	0.125	0.071429	0.111111	0.086957	0.047619	0.037037	0.08
0.095238	0.275862	0.205882	0.151515	0.193548	0.233333	0.153846	0.233333	0.166667	0.222222	0.175	0.266667	0.346154	0.208333	0.212121	0.212121	0.233333	0.272727	0.16129	0.038462	0.15	0.142857	0.344828	0.142857	0.21875	0.166667	0.159091	0.148148	0.230769	0.166667	0.206897	0.212121	0.241379	0.269231	0.190476	0.233333	0.111111	0.212121	0.184211	0.166667	0.275862	0.346154	0.722222	0.269231	0.241379	0.181818	0.291667	0.272727	0.36	0.178571
0.176471	0.133333	0.1875	0.129032	0.214286	0.0625	0.076923	0.096774	0.095238	0.111111	0.157895	0.129032	0.142857	0.04	0.121212	0.057143	0.0625	0.181818	0.064516	0.263158	0.162162	0.153846	0.125	0.074074	0.16129	0.054054	0.142857	0.037037	0.16	0.147059	0.103448	0.15625	0.269231	0.153846	0.222222	0.133333	0.227273	0.027778	0.05	0.032258	0.172414	0.066667	0.217391	0.153846	0.064516	0.277778	0.166667	0.190476	0.068966	0.071429
0.136364	0.3	0.30303	0.290323	0.3	0.258065	0.119048	0.344828	0.275	0.206897	0.25641	0.37931	0.37037	0.291667	0.166667	0.235294	0.3	0.375	0.1875	0.208333	0.230769	0.282051	0.322581	0.214286	0.242424	0.157895	0.261905	0.269231	0.214286	0.294118	0.37037	0.354839	0.310345	0.166667	0.173913	0.258065	0.230769	0.2	0.119048	0.233333	0.392857	0.275862	0.434783	0.206897	0.266667	0.166667	0.137931	0.25	0.285714	0.206897
0	0.135135	0.243243	0.194444	0.235294	0.2	0.219512	0.166667	0.227273	0.1875	0.444444	0.194444	0.212121	0.259259	0.363636	0.25	0.272727	0.382353	0.242424	0.066667	0.243902	0.325	0.189189	0.233333	0.294118	0.175	0.217391	0.2	0.48	0.205128	0.142857	0.25	0.205882	0.357143	0.111111	0.235294	0.129032	0.184211	0.219512	0.333333	0.2	0.176471	0.16129	0.727273	0.28125	0.148148	0.16129	0.269231	0.114286	0.310345
0	0.28125	0.216216	0.2	0.171429	0.205882	0.166667	0.171429	0.232558	0.193548	0.275	0.2	0.21875	0.269231	0.294118	0.375	0.322581	0.4375	0.212121	0.068966	0.162791	0.209302	0.228571	0.2	0.228571	0.243243	0.222222	0.25	0.384615	0.243243	0.181818	0.294118	0.142857	0.275862	0.074074	0.28125	0.133333	0.257143	0.324324	0.344828	0.242424	0.181818	0.206897	0.608696	0.290323	0.111111	0.166667	0.185185	0.117647	0.275862
0	0.175	0.243902	0.170732	0.205128	0.236842	0.222222	0.205128	0.282609	0.30303	0.357143	0.230769	0.25	0.21875	0.470588	0.219512	0.305556	0.405405	0.243243	0.057143	0.302326	0.288889	0.225	0.135135	0.324324	0.209302	0.244898	0.205882	0.448276	0.209302	0.216216	0.315789	0.210526	0.387097	0.09375	0.382353	0.142857	0.219512	0.222222	0.363636	0.27027	0.216216	0.205882	0.482759	0.352941	0.125	0.171429	0.266667	0.189189	0.387097
0.111111	0.257143	0.454545	0.216216	0.419355	0.222222	0.130435	0.294118	0.365854	0.176471	0.421053	0.323529	0.235294	0.2	0.27027	0.175	0.333333	0.324324	0.162162	0.259259	0.394737	0.410256	0.243243	0.181818	0.277778	0.113636	0.414634	0.151515	0.3	0.324324	0.272727	0.382353	0.433333	0.37931	0.066667	0.294118	0.321429	0.119048	0.181818	0.235294	0.222222	0.166667	0.266667	0.481481	0.228571	0.1	0.117647	0.25	0.138889	0.25
0.173913	0.322581	0.323529	0.354839	0.413793	0.205882	0.139535	0.322581	0.261905	0.233333	0.307692	0.354839	0.258065	0.222222	0.257143	0.257143	0.171429	0.243243	0.176471	0.148148	0.315789	0.333333	0.194444	0.2	0.30303	0.210526	0.25	0.206897	0.5	0.314286	0.3	0.419355	0.481481	0.321429	0.16	0.28125	0.307692	0.222222	0.166667	0.181818	0.322581	0.181818	0.206897	0.321429	0.25	0.153846	0.09375	0.28	0.117647	0.233333
0.071429	0.257143	0.454545	0.216216	0.333333	0.222222	0.130435	0.294118	0.365854	0.142857	0.421053	0.323529	0.235294	0.2	0.205128	0.175	0.333333	0.324324	0.194444	0.214286	0.292683	0.309524	0.243243	0.181818	0.210526	0.139535	0.380952	0.151515	0.258065	0.324324	0.272727	0.342857	0.34375	0.333333	0.066667	0.257143	0.275862	0.119048	0.181818	0.235294	0.222222	0.166667	0.266667	0.428571	0.228571	0.1	0.117647	0.166667	0.138889	0.25
0	0.333333	0.257143	0.171429	0.212121	0.212121	0.170732	0.142857	0.238095	0.16129	0.282051	0.171429	0.225806	0.230769	0.34375	0.30303	0.333333	0.40625	0.181818	0.071429	0.195122	0.214286	0.2	0.166667	0.2	0.216216	0.227273	0.172414	0.4	0.25	0.1875	0.264706	0.181818	0.333333	0.076923	0.25	0.137931	0.264706	0.297297	0.310345	0.212121	0.1875	0.259259	0.714286	0.258065	0.115385	0.172414	0.24	0.15625	0.241379
0	0.3125	0.277778	0.162162	0.2	0.2	0.190476	0.135135	0.255814	0.117647	0.3	0.162162	0.212121	0.214286	0.285714	0.323529	0.3125	0.305556	0.205882	0.066667	0.214286	0.232558	0.189189	0.15625	0.189189	0.236842	0.217391	0.16129	0.321429	0.236842	0.176471	0.25	0.205882	0.407407	0.111111	0.3125	0.09375	0.285714	0.315789	0.37931	0.2	0.176471	0.241379	0.461538	0.322581	0.148148	0.16129	0.222222	0.147059	0.310345
0.032609	0.159574	0.153061	0.134021	0.135417	0.147368	0.135922	0.135417	0.222222	0.09375	0.19	0.157895	0.150538	0.097826	0.166667	0.142857	0.159574	0.163265	0.125	0.064516	0.168317	0.212121	0.14433	0.11828	0.15625	0.151515	0.205882	0.072917	0.094737	0.1875	0.114583	0.178947	0.136842	0.129032	0.031915	0.172043	0.096774	0.154639	0.206186	0.163043	0.135417	0.138298	0.084211	0.09375	0.136842	0.031579	0.040404	0.06383	0.104167	0.105263
0.037037	0.152941	0.172414	0.137931	0.088889	0.126437	0.177778	0.152941	0.222222	0.093023	0.213483	0.164706	0.129412	0.071429	0.147727	0.16092	0.152941	0.157303	0.102273	0.073171	0.138298	0.159574	0.149425	0.068966	0.111111	0.170455	0.204301	0.095238	0.081395	0.197674	0.116279	0.188235	0.089888	0.08046	0.036145	0.166667	0.096386	0.147727	0.204545	0.142857	0.126437	0.116279	0.069767	0.105882	0.154762	0.035714	0.045455	0.059524	0.091954	0.119048
0.054545	0.180328	0.245902	0.237288	0.180328	0.220339	0.19403	0.263158	0.354839	0.152542	0.261538	0.258621	0.22807	0.122807	0.209677	0.153846	0.241379	0.222222	0.163934	0.068966	0.208955	0.257576	0.233333	0.116667	0.193548	0.166667	0.30303	0.137931	0.116667	0.241935	0.22807	0.271186	0.163934	0.114754	0.052632	0.220339	0.140351	0.136364	0.15942	0.166667	0.2	0.206897	0.118644	0.152542	0.224138	0.051724	0.047619	0.086207	0.131148	0.152542
0.068182	0.22	0.140351	0.215686	0.089286	0.051724	0.061538	0.109091	0.123077	0.017857	0.145161	0.127273	0.053571	0.039216	0.066667	0.142857	0.051724	0.1	0.052632	0.108696	0.09375	0.107692	0.05	0.037037	0.067797	0.118644	0.153846	0.018519	0.076923	0.2	0.092593	0.142857	0.111111	0.055556	0.065217	0.12963	0.102041	0.103448	0.112903	0.072727	0.089286	0.053571	0.057692	0.075472	0.090909	0.086957	0.078431	0.019608	0.035714	0.075472
0	0.137931	0.233333	0.214286	0.178571	0.32	0.108108	0.375	0.216216	0.26087	0.194444	0.307692	0.347826	0.470588	0.2	0.16129	0.222222	0.266667	0.28	0	0.2	0.222222	0.296296	0.272727	0.25	0.151515	0.205128	0.35	0.166667	0.266667	0.291667	0.241379	0.185185	0.208333	0	0.222222	0.238095	0.16129	0.138889	0.24	0.222222	0.347826	0.173913	0.208333	0.28	0	0	0.2	0.2	0.26087
0	0.121212	0.205882	0.1875	0.15625	0.233333	0.125	0.233333	0.225	0.222222	0.236842	0.225806	0.25	0.380952	0.176471	0.142857	0.37037	0.235294	0.241379	0.038462	0.15	0.170732	0.392857	0.333333	0.21875	0.135135	0.214286	0.409091	0.142857	0.2	0.25	0.212121	0.16129	0.178571	0	0.193548	0.2	0.142857	0.125	0.206897	0.193548	0.25	0.148148	0.222222	0.285714	0	0	0.217391	0.172414	0.222222
0.107143	0.363636	0.361111	0.352941	0.285714	0.184211	0.104167	0.285714	0.266667	0.205882	0.25	0.277778	0.228571	0.121212	0.230769	0.142857	0.216216	0.219512	0.128205	0.206897	0.285714	0.272727	0.236842	0.111111	0.175	0.111111	0.282609	0.114286	0.142857	0.282051	0.264706	0.297297	0.294118	0.205882	0.03125	0.216216	0.266667	0.142857	0.177778	0.162162	0.216216	0.194444	0.258065	0.205882	0.189189	0.0625	0.054054	0.2	0.2	0.171429
0.052632	0.2	0.45	0.195652	0.2	0.285714	0.148148	0.459459	0.404255	0.315789	0.361702	0.486486	0.3	0.210526	0.23913	0.14	0.421053	0.404762	0.232558	0.157895	0.285714	0.326531	0.4	0.166667	0.272727	0.092593	0.333333	0.2	0.195122	0.404762	0.405405	0.540541	0.232558	0.190476	0.02439	0.35	0.205128	0.117647	0.127273	0.209302	0.285714	0.3	0.170732	0.25	0.394737	0.04878	0.066667	0.125	0.243902	0.219512
0.133333	0.297297	0.405405	0.289474	0.297297	0.371429	0.217391	0.5	0.395349	0.375	0.414634	0.53125	0.393939	0.25	0.342105	0.214286	0.411765	0.472222	0.27027	0.151515	0.357143	0.439024	0.388889	0.194444	0.351351	0.177778	0.377778	0.235294	0.228571	0.432432	0.4375	0.961538	0.27027	0.222222	0.090909	0.454545	0.242424	0.186047	0.191489	0.314286	0.411765	0.352941	0.2	0.294118	0.566667	0.121212	0.105263	0.147059	0.25	0.257143
0.055556	0.238095	0.473684	0.204545	0.238095	0.333333	0.176471	0.485714	0.422222	0.333333	0.44186	0.558824	0.351351	0.222222	0.27907	0.170213	0.485714	0.390244	0.243902	0.166667	0.297872	0.369565	0.421053	0.175	0.317073	0.117647	0.375	0.210526	0.205128	0.425	0.388889	0.617647	0.243902	0.2	0.052632	0.405405	0.216216	0.145833	0.153846	0.25	0.333333	0.282051	0.179487	0.230769	0.457143	0.078947	0.069767	0.131579	0.225	0.230769
0.071429	0.257143	0.371429	0.216216	0.189189	0.466667	0.238095	0.375	0.365854	0.428571	0.384615	0.40625	0.5	0.241379	0.424242	0.236842	0.419355	0.53125	0.264706	0.096774	0.292683	0.341463	0.4375	0.181818	0.393939	0.166667	0.288889	0.225806	0.258065	0.441176	0.4	0.46875	0.194444	0.25	0.066667	0.692308	0.15625	0.205128	0.209302	0.354839	0.466667	0.4	0.225806	0.290323	0.653846	0.1	0.117647	0.166667	0.366667	0.290323
0.074074	0.228571	0.424242	0.189189	0.194444	0.433333	0.214286	0.387097	0.375	0.5	0.394737	0.419355	0.464286	0.25	0.393939	0.210526	0.482759	0.454545	0.272727	0.137931	0.333333	0.35	0.40625	0.1875	0.451613	0.142857	0.325581	0.233333	0.266667	0.411765	0.413793	0.483871	0.235294	0.258065	0.068966	0.72	0.16129	0.179487	0.159091	0.322581	0.433333	0.366667	0.233333	0.258065	0.615385	0.103448	0.088235	0.214286	0.333333	0.3
0.074074	0.228571	0.382353	0.189189	0.194444	0.482759	0.214286	0.387097	0.375	0.444444	0.358974	0.419355	0.518519	0.25	0.393939	0.210526	0.482759	0.5	0.272727	0.1	0.333333	0.35	0.451613	0.1875	0.40625	0.142857	0.295455	0.233333	0.225806	0.454545	0.413793	0.4375	0.2	0.21875	0.033333	0.592593	0.16129	0.179487	0.186047	0.28125	0.433333	0.413793	0.233333	0.258065	0.555556	0.066667	0.088235	0.214286	0.37931	0.258065
0	0.184211	0.4	0.15	0.184211	0.363636	0.177778	0.285714	0.325581	0.28125	0.341463	0.314286	0.387097	0.193548	0.371429	0.2	0.956522	0.388889	0.257143	0.029412	0.285714	0.302326	0.46875	0.142857	0.305556	0.136364	0.340909	0.258065	0.176471	0.25	0.34375	0.371429	0.189189	0.28125	0.03125	0.323529	0.085714	0.142857	0.177778	0.30303	0.25	0.34375	0.21875	0.322581	0.375	0.0625	0.114286	0.241379	0.354839	0.28125
0.129032	0.195122	0.261905	0.25	0.225	0.225	0.117647	0.324324	0.270833	0.184211	0.282609	0.282051	0.205128	0.205882	0.181818	0.155556	0.25641	0.2	0.2	0.114286	0.26087	0.25	0.307692	0.222222	0.243902	0.2	0.235294	0.264706	0.157895	0.255814	0.305556	0.333333	0.2	0.097561	0	0.225	0.272727	0.130435	0.14	0.146341	0.25641	0.236842	0.162162	0.125	0.230769	0	0.04878	0.111111	0.210526	0.25
0	0.157895	0.170732	0.125	0.128205	0.189189	0.238095	0.157895	0.166667	0.176471	0.2	0.184211	0.2	0.2	0.342857	0.205128	0.257143	0.225	0.194444	0.030303	0.204545	0.170213	0.179487	0.114286	0.179487	0.225	0.208333	0.1875	0.258065	0.195122	0.166667	0.236842	0.102564	0.176471	0.103448	0.294118	0.121212	0.175	0.238095	0.272727	0.257143	0.166667	0.151515	0.212121	0.30303	0.1	0.117647	0.166667	0.171429	0.25
0.111111	0.222222	0.090909	0.216216	0.128205	0.073171	0.083333	0.128205	0.098039	0.052632	0.148936	0.153846	0.135135	0.028571	0.044444	0.093023	0.023256	0.139535	0	0.133333	0.104167	0.1	0.095238	0.026316	0.045455	0.088889	0.16	0	0.054054	0.166667	0.105263	0.146341	0.131579	0.052632	0.185185	0.1	0.121212	0.093023	0.083333	0.05	0.157895	0.076923	0.1875	0.052632	0.04878	0.178571	0.1875	0	0.108108	0.052632
0	0.128205	0.333333	0.097561	0.157895	0.333333	0.155556	0.257143	0.333333	0.25	0.227273	0.25	0.3125	0.2	0.27027	0.093023	0.333333	0.225	0.194444	0	0.232558	0.25	0.277778	0.114286	0.243243	0.139535	0.348837	0.225806	0.114286	0.225	0.3125	0.236842	0.162162	0.176471	0	0.257143	0.088235	0.093023	0.106383	0.2	0.222222	0.3125	0.151515	0.176471	0.264706	0	0.027027	0.166667	0.322581	0.176471
0.136364	0.181818	0.075	0.176471	0.147059	0.083333	0.119048	0.114286	0.085106	0.060606	0.113636	0.176471	0.15625	0.033333	0.05	0.105263	0.026316	0.128205	0	0.16	0.116279	0.111111	0.108108	0.030303	0.078947	0.1	0.104167	0	0.0625	0.157895	0.088235	0.166667	0.1875	0.060606	0.285714	0.114286	0.142857	0.105263	0.093023	0.057143	0.181818	0.121212	0.269231	0.060606	0.055556	0.272727	0.375	0	0.090909	0.060606
0	0	0	0.028571	0.09375	0	0	0	0	0	0	0	0	0.08	0	0	0	0	0.096774	0	0.073171	0.069767	0	0.111111	0.088235	0	0	0	0	0	0	0	0.096774	0.107143	0	0	0.037037	0.027027	0.02381	0.1	0	0	0	0	0	0	0	0	0	0
0.24	0.40625	0.25641	0.243243	0.451613	0.216216	0.104167	0.216216	0.23913	0.205882	0.341463	0.243243	0.228571	0.15625	0.333333	0.170732	0.216216	0.190476	0.222222	0.296296	0.384615	0.365854	0.175	0.111111	0.27027	0.190476	0.229167	0.114286	0.290323	0.190476	0.194444	0.297297	0.419355	0.322581	0.064516	0.285714	0.1875	0.2	0.204545	0.228571	0.285714	0.194444	0.258065	0.322581	0.222222	0.096774	0.114286	0.384615	0.166667	0.28125
0	0.184211	0.289474	0.15	0.125	0.40625	0.232558	0.363636	0.357143	0.413793	0.309524	0.393939	0.387097	0.275862	0.454545	0.263158	0.363636	0.5625	0.257143	0.060606	0.2	0.272727	0.342857	0.176471	0.342857	0.219512	0.282609	0.21875	0.37931	0.351351	0.34375	0.454545	0.128205	0.242424	0.1	0.607143	0.085714	0.230769	0.177778	0.30303	0.363636	0.34375	0.21875	0.366667	0.76	0.133333	0.181818	0.16129	0.3125	0.322581
0	0.142857	0.2	0.117647	0.098039	0.333333	0.361702	0.272727	0.333333	0.333333	0.245283	0.295455	0.317073	0.2	0.340909	0.204082	0.244444	0.386364	0.195652	0.022222	0.160714	0.218182	0.318182	0.133333	0.288889	0.22	0.206897	0.219512	0.214286	0.244898	0.255814	0.372093	0.122449	0.155556	0.1	0.473684	0.113636	0.204082	0.185185	0.227273	0.302326	0.285714	0.190476	0.209302	0.617647	0.097561	0.162791	0.119048	0.261905	0.238095
0	0.21875	0.264706	0.176471	0.258065	0.21875	0.175	0.21875	0.243902	0.296296	0.289474	0.25	0.233333	0.291667	0.354839	0.272727	0.3	0.294118	0.225806	0.035714	0.297297	0.315789	0.205882	0.172414	0.322581	0.222222	0.204545	0.222222	0.545455	0.222222	0.233333	0.272727	0.266667	0.458333	0.125	0.3	0.066667	0.235294	0.236842	0.275862	0.3	0.193548	0.269231	0.458333	0.357143	0.166667	0.178571	0.363636	0.16129	0.346154
0.035714	0.264706	0.342857	0.189189	0.194444	0.535714	0.214286	0.433333	0.309524	0.392857	0.325	0.466667	0.782609	0.296296	0.314286	0.15	0.387097	0.5	0.3125	0.03125	0.238095	0.35	0.607143	0.225806	0.40625	0.116279	0.325581	0.275862	0.151515	0.371429	0.413793	0.4375	0.2	0.181818	0.148148	0.433333	0.16129	0.15	0.133333	0.242424	0.34375	0.576923	0.423077	0.21875	0.448276	0.142857	0.15625	0.214286	0.428571	0.21875
0.103448	0.210526	0.162791	0.236842	0.277778	0.179487	0.102041	0.243243	0.16	0.2	0.244444	0.205128	0.189189	0.266667	0.113636	0.139535	0.121951	0.159091	0.323529	0.090909	0.222222	0.266667	0.170732	0.64	0.333333	0.108696	0.176471	0.176471	0.108108	0.186047	0.157895	0.225	0.25	0.2	0	0.121951	0.181818	0.113636	0.102041	0.222222	0.15	0.189189	0.142857	0.135135	0.153846	0	0.052632	0.121212	0.131579	0.105263
0.066667	0.215686	0.2	0.285714	0.192308	0.192308	0.22807	0.192308	0.254237	0.183673	0.285714	0.211538	0.2	0.125	0.181818	0.160714	0.169811	0.240741	0.173077	0.106383	0.183333	0.237288	0.207547	0.14	0.230769	0.155172	0.225806	0.166667	0.23913	0.218182	0.176471	0.27451	0.173077	0.137255	0.086957	0.215686	0.145833	0.12069	0.147541	0.176471	0.24	0.2	0.217391	0.183673	0.22	0.108696	0.142857	0.152174	0.156863	0.208333
0.153846	0.294118	0.371429	0.323529	0.375	0.189189	0.181818	0.294118	0.302326	0.212121	0.35	0.323529	0.2	0.2	0.305556	0.27027	0.222222	0.324324	0.162162	0.214286	0.358974	0.375	0.210526	0.181818	0.277778	0.195122	0.26087	0.1875	0.56	0.324324	0.272727	0.382353	0.433333	0.428571	0.103448	0.294118	0.275862	0.205128	0.209302	0.235294	0.294118	0.166667	0.225806	0.37931	0.30303	0.137931	0.151515	0.25	0.108108	0.25
0.058824	0.219512	0.421053	0.186047	0.219512	0.315789	0.115385	0.388889	0.44186	0.314286	0.304348	0.416667	0.333333	0.135135	0.292683	0.104167	0.351351	0.27907	0.195122	0.142857	0.311111	0.297872	0.333333	0.125	0.238095	0.1	0.361702	0.157895	0.125	0.341463	0.371429	0.358974	0.25641	0.15	0.027027	0.351351	0.228571	0.104167	0.137255	0.170732	0.315789	0.263158	0.222222	0.15	0.324324	0.054054	0.047619	0.171429	0.342857	0.210526
0.009804	0.054054	0.034188	0.072727	0.054054	0.008621	0.05042	0.008621	0.040323	0.008929	0.067227	0.008547	0.008772	0.028302	0.052632	0.043478	0.035398	0.02521	0.045045	0.019048	0.067797	0.066667	0.008475	0.046729	0.053097	0.051724	0.048	0.018349	0.056604	0.008264	0.017699	0.034483	0.045045	0.066038	0.029412	0.044643	0.018519	0.043478	0.059322	0.074766	0.035398	0.017699	0.018349	0.046296	0.035714	0.029126	0.04717	0.028571	0.017857	0.046296
0.106383	0.178571	0.320755	0.155172	0.178571	0.245283	0.138462	0.346939	0.344828	0.24	0.333333	0.395833	0.254902	0.16	0.210526	0.131148	0.346939	0.290909	0.226415	0.166667	0.229508	0.283333	0.307692	0.12963	0.236364	0.092308	0.290323	0.153846	0.150943	0.314815	0.28	0.4375	0.181818	0.148148	0.038462	0.294118	0.156863	0.112903	0.121212	0.185185	0.245283	0.207547	0.132075	0.169811	0.326531	0.057692	0.052632	0.096154	0.166667	0.169811
0.148148	0.285714	0.361111	0.352941	0.363636	0.184211	0.177778	0.285714	0.295455	0.205882	0.341463	0.314286	0.194444	0.193548	0.297297	0.263158	0.216216	0.315789	0.157895	0.206897	0.35	0.365854	0.205128	0.176471	0.27027	0.190476	0.255319	0.181818	0.538462	0.315789	0.264706	0.371429	0.419355	0.413793	0.1	0.285714	0.310345	0.230769	0.232558	0.228571	0.285714	0.162162	0.21875	0.366667	0.294118	0.133333	0.147059	0.241379	0.105263	0.242424
0	0.121212	0.108108	0.225806	0.088235	0.193548	0.40625	0.121212	0.139535	0.137931	0.146341	0.151515	0.206897	0.208333	0.212121	0.212121	0.15625	0.2	0.125	0	0.15	0.116279	0.147059	0.103448	0.147059	0.2	0.133333	0.192308	0.230769	0.166667	0.129032	0.176471	0.090909	0.137931	0.190476	0.233333	0.153846	0.212121	0.184211	0.25	0.321429	0.166667	0.192308	0.137931	0.241379	0.181818	0.192308	0.076923	0.133333	0.222222
0	0.137255	0.265306	0.134615	0.09434	0.318182	0.222222	0.26087	0.320755	0.317073	0.307692	0.282609	0.272727	0.190476	0.326087	0.173077	0.318182	0.340426	0.23913	0.043478	0.196429	0.232143	0.276596	0.152174	0.276596	0.125	0.285714	0.268293	0.204545	0.235294	0.244444	0.326087	0.096154	0.173913	0.045455	0.380952	0.133333	0.150943	0.137931	0.244444	0.288889	0.244444	0.130435	0.227273	0.390244	0.068182	0.083333	0.139535	0.222222	0.255814
0.153846	0.294118	0.297297	0.216216	0.62963	0.189189	0.083333	0.222222	0.217391	0.176471	0.317073	0.216216	0.2	0.241379	0.205128	0.119048	0.189189	0.166667	0.228571	0.133333	0.472222	0.447368	0.179487	0.258065	0.393939	0.113636	0.288889	0.117647	0.258065	0.25641	0.235294	0.27027	0.791667	0.538462	0.066667	0.222222	0.233333	0.146341	0.130435	0.235294	0.222222	0.166667	0.225806	0.290323	0.162162	0.064516	0.027027	0.296296	0.138889	0.176471
0	0.170213	0.204082	0.142857	0.222222	0.25	0.145455	0.195652	0.264151	0.243902	0.203704	0.217391	0.261905	0.175	0.348837	0.16	0.309524	0.22449	0.255814	0.046512	0.306122	0.32	0.212766	0.162791	0.325581	0.153846	0.169492	0.113636	0.219512	0.176471	0.232558	0.234043	0.227273	0.275	0.075	0.309524	0.090909	0.208333	0.211538	0.358974	0.222222	0.232558	0.166667	0.214286	0.317073	0.073171	0.088889	0.210526	0.3	0.243902
0.083333	0.111111	0.1	0.205882	0.081081	0.176471	0.411765	0.111111	0.130435	0.125	0.136364	0.138889	0.1875	0.185185	0.194444	0.194444	0.142857	0.184211	0.181818	0.071429	0.139535	0.108696	0.135135	0.09375	0.135135	0.184211	0.125	0.172414	0.206897	0.153846	0.117647	0.162162	0.083333	0.125	0.166667	0.212121	0.137931	0.194444	0.170732	0.266667	0.290323	0.151515	0.172414	0.125	0.21875	0.16	0.172414	0.068966	0.121212	0.2
0	0.25	0.225	0.179487	0.153846	0.184211	0.177778	0.153846	0.212766	0.138889	0.27907	0.179487	0.194444	0.233333	0.297297	0.333333	0.25	0.388889	0.189189	0.060606	0.148936	0.191489	0.205128	0.176471	0.205128	0.25	0.204082	0.181818	0.37931	0.25	0.162162	0.263158	0.128205	0.28125	0.1	0.285714	0.117647	0.297297	0.292683	0.34375	0.216216	0.162162	0.181818	0.518519	0.294118	0.133333	0.181818	0.16129	0.105263	0.322581
0.125	0.242424	0.40625	0.2	0.708333	0.205882	0.065217	0.322581	0.292683	0.193548	0.378378	0.3125	0.258065	0.32	0.189189	0.128205	0.205882	0.179487	0.25	0.148148	0.515152	0.485714	0.228571	0.285714	0.433333	0.095238	0.27907	0.166667	0.241379	0.277778	0.344828	0.257143	0.73913	0.541667	0.035714	0.205882	0.259259	0.1	0.088889	0.258065	0.171429	0.181818	0.206897	0.321429	0.176471	0.034483	0	0.333333	0.151515	0.15625
0.111111	0.157895	0.2	0.184211	0.157895	0.333333	0.268293	0.294118	0.272727	0.290323	0.317073	0.285714	0.3125	0.241379	0.305556	0.175	0.222222	0.324324	0.387097	0.133333	0.204545	0.222222	0.243243	0.181818	0.314286	0.225	0.234043	0.357143	0.21875	0.289474	0.235294	0.305556	0.131579	0.176471	0.103448	0.294118	0.15625	0.175	0.155556	0.272727	0.294118	0.272727	0.1875	0.212121	0.30303	0.1	0.085714	0.166667	0.205882	0.290323
0.117647	0.20339	0.293103	0.2	0.245614	0.183333	0.067568	0.20339	0.238806	0.240741	0.246154	0.220339	0.210526	0.086207	0.254237	0.088235	0.20339	0.206349	0.166667	0.150943	0.290323	0.28125	0.196721	0.081967	0.216667	0.085714	0.25	0.083333	0.157895	0.225806	0.210526	0.233333	0.206897	0.155172	0.017241	0.245614	0.142857	0.104478	0.128571	0.131148	0.183333	0.189655	0.140351	0.155172	0.206897	0.034483	0.048387	0.192308	0.214286	0.175439
0	0.115385	0.24	0.156863	0.115385	0.234043	0.245283	0.208333	0.272727	0.2	0.283019	0.229167	0.217391	0.162791	0.297872	0.173077	0.288889	0.285714	0.1875	0.043478	0.196429	0.254545	0.22449	0.12766	0.22449	0.211538	0.220339	0.181818	0.204545	0.211538	0.191489	0.297872	0.096154	0.173913	0.069767	0.318182	0.085106	0.173077	0.245283	0.302326	0.208333	0.191489	0.106383	0.255814	0.325581	0.068182	0.083333	0.113636	0.145833	0.255814
0.111111	0.517241	0.263158	0.285714	0.257143	0.294118	0.130435	0.333333	0.302326	0.25	0.285714	0.363636	0.354839	0.241379	0.205128	0.27027	0.257143	0.25641	0.194444	0.096774	0.261905	0.27907	0.277778	0.181818	0.277778	0.25641	0.26087	0.225806	0.181818	0.441176	0.3125	0.342857	0.264706	0.142857	0.066667	0.294118	0.193548	0.27027	0.209302	0.272727	0.333333	0.272727	0.225806	0.176471	0.264706	0.064516	0.027027	0.166667	0.205882	0.25
0	0.176471	0.257143	0.205882	0.25	0.176471	0.2	0.176471	0.209302	0.241379	0.25	0.205882	0.1875	0.230769	0.34375	0.30303	0.212121	0.363636	0.181818	0.071429	0.225	0.243902	0.166667	0.166667	0.272727	0.216216	0.2	0.214286	0.944444	0.216216	0.1875	0.228571	0.258065	0.44	0.12	0.290323	0.1	0.228571	0.2	0.266667	0.25	0.151515	0.214286	0.565217	0.344828	0.16	0.172414	0.291667	0.121212	0.333333
0.054054	0.292683	0.425	0.2	0.292683	0.325	0.173077	0.472222	0.444444	0.4	0.369565	0.5	0.342105	0.216216	0.302326	0.244444	0.358974	0.414634	0.238095	0.162162	0.347826	0.422222	0.341463	0.170732	0.341463	0.208333	0.367347	0.205128	0.263158	0.526316	0.378378	0.555556	0.3	0.25641	0.051282	0.358974	0.210526	0.217391	0.22	0.243902	0.325	0.275	0.205128	0.289474	0.405405	0.076923	0.093023	0.189189	0.219512	0.225
0	0.193548	0.205882	0.1875	0.275862	0.193548	0.184211	0.193548	0.166667	0.269231	0.27027	0.225806	0.206897	0.26087	0.290323	0.25	0.233333	0.235294	0.241379	0.038462	0.210526	0.230769	0.147059	0.230769	0.344828	0.235294	0.159091	0.291667	0.6	0.2	0.206897	0.212121	0.285714	0.375	0.136364	0.275862	0.153846	0.212121	0.184211	0.206897	0.233333	0.166667	0.192308	0.375	0.333333	0.130435	0.148148	0.4	0.133333	0.32
0.078947	0.25	0.512821	0.272727	0.341463	0.309524	0.211538	0.341463	0.456522	0.275	0.969697	0.365854	0.325	0.175	0.318182	0.183673	0.341463	0.363636	0.227273	0.125	0.391304	0.466667	0.325581	0.190476	0.357143	0.132075	0.408163	0.225	0.219512	0.304348	0.358974	0.380952	0.317073	0.307692	0.075	0.341463	0.230769	0.16	0.211538	0.261905	0.27907	0.292683	0.166667	0.307692	0.317073	0.073171	0.088889	0.243243	0.181818	0.243902
0	0.257143	0.2	0.184211	0.157895	0.189189	0.181818	0.157895	0.217391	0.142857	0.285714	0.184211	0.2	0.241379	0.305556	0.342857	0.294118	0.4	0.194444	0.0625	0.152174	0.195652	0.210526	0.181818	0.179487	0.25641	0.208333	0.1875	0.392857	0.25641	0.166667	0.27027	0.131579	0.25	0.103448	0.294118	0.121212	0.305556	0.3	0.354839	0.222222	0.166667	0.1875	0.481481	0.30303	0.137931	0.1875	0.166667	0.108108	0.333333
0.048387	0.179104	0.185714	0.403509	0.128571	0.144928	0.16	0.19697	0.181818	0.119403	0.202703	0.212121	0.149254	0.092308	0.138889	0.123288	0.128571	0.166667	0.098592	0.061538	0.142857	0.2	0.125	0.072464	0.157143	0.135135	0.24	0.106061	0.104478	0.217391	0.184615	0.205882	0.147059	0.086957	0.063492	0.161765	0.125	0.138889	0.144737	0.132353	0.161765	0.149254	0.106061	0.086957	0.164179	0.0625	0.057971	0.060606	0.101449	0.153846
0.121951	0.176471	0.422222	0.173077	0.176471	0.25	0.133333	0.395349	0.358491	0.272727	0.346154	0.418605	0.26087	0.181818	0.211538	0.125	0.363636	0.354167	0.255319	0.190476	0.254545	0.290909	0.347826	0.145833	0.24	0.083333	0.298246	0.173913	0.170213	0.354167	0.348837	0.465116	0.204082	0.166667	0.021277	0.304348	0.177778	0.105263	0.114754	0.183673	0.25	0.26087	0.148936	0.217391	0.340909	0.042553	0.058824	0.108696	0.212766	0.191489
0.111111	0.257143	0.263158	0.607143	0.257143	0.189189	0.130435	0.294118	0.244444	0.176471	0.285714	0.285714	0.235294	0.2	0.146341	0.175	0.189189	0.225	0.162162	0.133333	0.204545	0.25	0.179487	0.181818	0.210526	0.195122	0.288889	0.1875	0.21875	0.289474	0.272727	0.305556	0.264706	0.142857	0.103448	0.222222	0.233333	0.146341	0.155556	0.2	0.257143	0.2	0.1875	0.212121	0.194444	0.137931	0.085714	0.09375	0.138889	0.25
0	0.055556	0.135135	0.054054	0.027027	0.055556	0.15	0.027027	0.111111	0	0.170732	0.054054	0.058824	0.071429	0.171429	0.171429	0.151515	0.162162	0.057143	0.076923	0.068182	0.088889	0.081081	0.03125	0.052632	0.131579	0.106383	0.066667	0.178571	0.04878	0.028571	0.108108	0.027778	0.133333	0.130435	0.151515	0	0.108108	0.179487	0.2	0.085714	0.028571	0.032258	0.172414	0.15625	0.125	0.142857	0.035714	0	0.133333
0.052632	0.193548	0.258065	0.25	0.174603	0.233333	0.188406	0.254237	0.34375	0.129032	0.253731	0.25	0.220339	0.118644	0.203125	0.149254	0.213115	0.19697	0.15873	0.066667	0.202899	0.231884	0.225806	0.112903	0.1875	0.161765	0.313433	0.133333	0.112903	0.234375	0.220339	0.241935	0.177419	0.111111	0.068966	0.213115	0.155172	0.149254	0.171429	0.16129	0.193548	0.2	0.114754	0.147541	0.196721	0.067797	0.046154	0.083333	0.163934	0.166667
0.036364	0.183333	0.25	0.220339	0.145161	0.245614	0.144928	0.314815	0.360656	0.264151	0.227273	0.358491	0.254545	0.125	0.193548	0.193548	0.20339	0.266667	0.147541	0.070175	0.176471	0.223881	0.237288	0.1	0.196721	0.151515	0.287879	0.140351	0.118644	0.333333	0.254545	0.298246	0.166667	0.098361	0.053571	0.245614	0.163636	0.193548	0.161765	0.131148	0.20339	0.210526	0.12069	0.116667	0.272727	0.052632	0.031746	0.087719	0.192982	0.135593
0.078947	0.078431	0.134615	0.076923	0.195652	0.018519	0.032787	0.1	0.155172	0.040816	0.140351	0.098039	0.039216	0.044444	0.054545	0.017544	0.057692	0.090909	0.102041	0.184211	0.230769	0.222222	0.055556	0.086957	0.096154	0	0.131148	0.042553	0.06383	0.153846	0.06	0.16	0.227273	0.133333	0.02381	0.1	0.170732	0	0.032787	0.12766	0.057692	0	0.042553	0.108696	0.038462	0.047619	0.065217	0.069767	0	0.0625
0.025	0.037736	0.053571	0.076923	0.018519	0.057692	0.188679	0.057692	0.063492	0	0.065574	0.076923	0.104167	0.021739	0.115385	0.137255	0.078431	0.2	0.018868	0.046512	0.04918	0.047619	0.096154	0.041667	0.017857	0.132075	0.061538	0	0.162791	0.052632	0.06	0.074074	0.018868	0.085106	0.131579	0.1	0.021277	0.137255	0.188679	0.12766	0.1	0.104167	0.195122	0.133333	0.102041	0.157895	0.4	0.022222	0.106383	0.085106
0.09375	0.25641	0.358974	0.388889	0.25641	0.25641	0.14	0.324324	0.355556	0.216216	0.372093	0.351351	0.27027	0.242424	0.209302	0.130435	0.289474	0.255814	0.2	0.083333	0.26087	0.276596	0.243902	0.189189	0.275	0.173913	0.3125	0.228571	0.157895	0.35	0.342857	0.368421	0.263158	0.153846	0.057143	0.25641	0.272727	0.155556	0.1875	0.236842	0.289474	0.236842	0.162162	0.184211	0.263158	0.055556	0.04878	0.111111	0.210526	0.25
0.05	0.166667	0.227273	0.238095	0.184615	0.203125	0.197183	0.241935	0.328358	0.140625	0.279412	0.258065	0.190476	0.169492	0.176471	0.09589	0.166667	0.205882	0.169231	0.063492	0.228571	0.257143	0.144928	0.142857	0.215385	0.123288	0.318841	0.126984	0.107692	0.242424	0.229508	0.269841	0.206349	0.140625	0.048387	0.184615	0.147541	0.111111	0.133333	0.209677	0.222222	0.171875	0.092308	0.106061	0.1875	0.047619	0.044118	0.0625	0.138462	0.15873
0.05	0.166667	0.227273	0.238095	0.184615	0.203125	0.197183	0.241935	0.328358	0.140625	0.26087	0.258065	0.190476	0.169492	0.176471	0.09589	0.166667	0.205882	0.169231	0.063492	0.228571	0.257143	0.144928	0.142857	0.215385	0.123288	0.318841	0.126984	0.107692	0.242424	0.229508	0.269841	0.206349	0.140625	0.048387	0.184615	0.147541	0.111111	0.133333	0.209677	0.222222	0.171875	0.092308	0.106061	0.1875	0.047619	0.044118	0.0625	0.138462	0.15873
0.068966	0.153846	0.289474	0.243243	0.184211	0.285714	0.152174	0.323529	0.23913	0.242424	0.222222	0.277778	0.387097	0.193548	0.2	0.116279	0.25	0.282051	0.222222	0.029412	0.2	0.217391	0.342857	0.142857	0.236842	0.136364	0.229167	0.181818	0.111111	0.25	0.34375	0.263158	0.222222	0.171429	0.1	0.216216	0.1875	0.2	0.177778	0.194444	0.285714	0.34375	0.3	0.171429	0.222222	0.096774	0.147059	0.16129	0.3125	0.171429
0	0.122449	0.282609	0.166667	0.122449	0.25	0.235294	0.25	0.288462	0.243902	0.354167	0.272727	0.261905	0.175	0.348837	0.16	0.341463	0.363636	0.2	0.046512	0.207547	0.294118	0.266667	0.111111	0.266667	0.2	0.254545	0.166667	0.219512	0.22449	0.232558	0.348837	0.102041	0.186047	0.075	0.375	0.090909	0.183673	0.26	0.325	0.25	0.232558	0.113636	0.243902	0.35	0.073171	0.088889	0.121951	0.181818	0.275
0.12	0.272727	0.393939	0.228571	0.272727	0.448276	0.162791	0.5	0.384615	0.407407	0.368421	0.535714	0.481481	0.259259	0.285714	0.216216	0.448276	0.424242	0.366667	0.066667	0.307692	0.358974	0.375	0.233333	0.466667	0.175	0.333333	0.333333	0.193548	0.424242	0.538462	0.5	0.242424	0.1875	0.034483	0.4	0.206897	0.216216	0.162791	0.290323	0.4	0.428571	0.241379	0.225806	0.413793	0.033333	0.028571	0.222222	0.3	0.225806
0.103448	0.277778	0.470588	0.27027	0.277778	0.352941	0.148936	0.483871	0.380952	0.272727	0.435897	0.424242	0.375	0.225806	0.25641	0.195122	0.352941	0.342105	0.25	0.125	0.341463	0.390244	0.411765	0.242424	0.333333	0.159091	0.428571	0.212121	0.138889	0.416667	0.466667	0.441176	0.285714	0.2	0	0.314286	0.21875	0.139535	0.173913	0.222222	0.314286	0.375	0.25	0.2	0.323529	0.029412	0.052632	0.15625	0.30303	0.235294
0.064516	0.205128	0.159091	0.170732	0.146341	0.342857	0.375	0.205128	0.229167	0.228571	0.212766	0.230769	0.323529	0.181818	0.315789	0.162791	0.236842	0.268293	0.210526	0.057143	0.191489	0.183673	0.25641	0.076923	0.225	0.181818	0.22	0.242424	0.2	0.209302	0.216216	0.25	0.15	0.194444	0.129032	0.305556	0.142857	0.219512	0.195652	0.216216	0.382353	0.285714	0.28125	0.194444	0.314286	0.125	0.138889	0.1875	0.257143	0.194444
0.088889	0.26	0.313725	0.185185	0.211538	0.235294	0.20339	0.211538	0.271186	0.255319	0.327273	0.230769	0.297872	0.145833	0.404255	0.222222	0.3125	0.387755	0.24	0.104167	0.241379	0.298246	0.27451	0.115385	0.27451	0.214286	0.241935	0.14	0.288889	0.236364	0.244898	0.269231	0.192308	0.255319	0.108696	0.285714	0.12	0.245283	0.267857	0.22	0.235294	0.297872	0.212766	0.340909	0.291667	0.130435	0.14	0.255814	0.276596	0.204082
0	0.12	0.276596	0.163265	0.12	0.272727	0.230769	0.244444	0.259259	0.209302	0.294118	0.266667	0.255814	0.170732	0.282609	0.18	0.4	0.386364	0.195652	0.045455	0.181818	0.240741	0.318182	0.133333	0.234043	0.150943	0.25	0.219512	0.243902	0.244898	0.255814	0.311111	0.1	0.209302	0.047619	0.302326	0.088889	0.134615	0.185185	0.255814	0.244444	0.255814	0.136364	0.3	0.341463	0.071429	0.111111	0.093023	0.204545	0.3
0.333333	0.151515	0.05	0.147059	0.085714	0.055556	0.045455	0.055556	0.086957	0	0.090909	0.054054	0.058824	0.034483	0.051282	0.108108	0.055556	0.075	0.121212	0.217391	0.093023	0.088889	0.052632	0.064516	0.052632	0.075	0.083333	0	0.064516	0.04878	0.028571	0.108108	0.057143	0.0625	0.04	0.085714	0.068966	0.108108	0.121951	0.058824	0.117647	0.058824	0.103448	0.0625	0.057143	0.08	0.103448	0.035714	0.029412	0.0625
0.115385	0.264706	0.382353	0.222222	0.228571	0.387097	0.214286	0.433333	0.375	0.444444	0.394737	0.466667	0.413793	0.206897	0.393939	0.210526	0.433333	0.454545	0.272727	0.137931	0.368421	0.35	0.363636	0.151515	0.363636	0.170732	0.325581	0.233333	0.266667	0.371429	0.413793	0.533333	0.2	0.258065	0.068966	0.535714	0.16129	0.210526	0.186047	0.322581	0.433333	0.322581	0.275862	0.21875	0.5	0.103448	0.121212	0.214286	0.37931	0.3
0.047619	0.16	0.55	0.18	0.208333	0.288889	0.178571	0.380952	0.489362	0.2	0.416667	0.372093	0.272727	0.162791	0.244898	0.12963	0.414634	0.285714	0.1875	0.142857	0.288462	0.326923	0.363636	0.152174	0.25	0.086207	0.384615	0.181818	0.12766	0.3125	0.4	0.355556	0.23913	0.2	0.045455	0.26087	0.186047	0.089286	0.137931	0.191489	0.234043	0.272727	0.155556	0.2	0.266667	0.044444	0.061224	0.113636	0.222222	0.2
0.1	0.288889	0.127273	0.113208	0.115385	0.137255	0.157895	0.16	0.166667	0.148936	0.214286	0.156863	0.142857	0.136364	0.196078	0.564103	0.183673	0.235294	0.212766	0.116279	0.135593	0.15	0.132075	0.152174	0.153846	0.465116	0.16129	0.155556	0.232558	0.235294	0.142857	0.196078	0.096154	0.173913	0.069767	0.234043	0.0625	0.487805	0.466667	0.244444	0.183673	0.142857	0.181818	0.227273	0.212766	0.093023	0.130435	0.139535	0.145833	0.227273
0.05	0.217391	0.463415	0.212766	0.244444	0.244444	0.185185	0.333333	0.307692	0.181818	0.375	0.390244	0.317073	0.170732	0.229167	0.156863	0.333333	0.386364	0.195652	0.15	0.27451	0.313725	0.348837	0.133333	0.208333	0.109091	0.4	0.190476	0.159091	0.270833	0.317073	0.340909	0.25	0.209302	0.1	0.244444	0.195122	0.113208	0.142857	0.227273	0.302326	0.255814	0.282051	0.268293	0.25	0.125	0.190476	0.119048	0.232558	0.209302
0.045455	0.057143	0.051282	0.085714	0.027778	0.027778	0.153846	0.027778	0.065217	0	0.068182	0.055556	0.09375	0.035714	0.111111	0.142857	0.088235	0.166667	0.028571	0.08	0.045455	0.043478	0.083333	0.066667	0.026316	0.135135	0.085106	0	0.185185	0.05	0.029412	0.081081	0.028571	0.137931	0.25	0.121212	0	0.111111	0.125	0.09375	0.15625	0.09375	0.409091	0.137931	0.125	0.3	0.823529	0.037037	0.096774	0.1
0.068182	0.12963	0.326531	0.148148	0.150943	0.297872	0.232143	0.270833	0.377358	0.295455	0.339623	0.291667	0.282609	0.177778	0.333333	0.163636	0.326087	0.346939	0.25	0.085106	0.22807	0.309091	0.235294	0.142857	0.285714	0.118644	0.315789	0.170213	0.217391	0.245283	0.282609	0.361702	0.153846	0.23913	0.042553	0.386364	0.08	0.142857	0.15	0.255319	0.244898	0.282609	0.122449	0.295455	0.395349	0.06383	0.078431	0.155556	0.234043	0.23913
0.25	0.36	0.225806	0.25	0.307692	0.259259	0.105263	0.259259	0.210526	0.2	0.189189	0.296296	0.333333	0.238095	0.193548	0.193548	0.214286	0.181818	0.137931	0.142857	0.264706	0.216216	0.241379	0.16	0.241379	0.181818	0.2	0.166667	0.208333	0.258065	0.28	0.321429	0.32	0.2	0.1	0.259259	0.35	0.193548	0.2	0.185185	0.307692	0.185185	0.333333	0.2	0.178571	0.095238	0.037037	0.25	0.192308	0.2
0.153846	0.255319	0.211538	0.176471	0.204082	0.092593	0.063492	0.18	0.20339	0.078431	0.169492	0.176471	0.117647	0.085106	0.107143	0.148148	0.134615	0.185185	0.137255	0.25641	0.214286	0.206897	0.12963	0.08	0.109091	0.122807	0.196721	0.06	0.125	0.28	0.163265	0.215686	0.234043	0.122449	0.021739	0.156863	0.155556	0.127273	0.175439	0.117647	0.113208	0.096154	0.12766	0.170213	0.09434	0.043478	0.06	0.086957	0.098039	0.145833
0.050847	0.1875	0.19403	0.425926	0.1875	0.151515	0.166667	0.206349	0.189189	0.125	0.211268	0.222222	0.15625	0.133333	0.144928	0.128571	0.134328	0.173913	0.153846	0.064516	0.180556	0.242857	0.130435	0.126984	0.2	0.140845	0.25	0.111111	0.109375	0.227273	0.193548	0.215385	0.209677	0.142857	0.066667	0.169231	0.131148	0.144928	0.150685	0.193548	0.169231	0.15625	0.111111	0.090909	0.171875	0.065574	0.060606	0.063492	0.106061	0.16129
0.166667	0.354839	0.277778	0.535714	0.354839	0.235294	0.111111	0.3125	0.255814	0.151515	0.3	0.34375	0.25	0.259259	0.153846	0.184211	0.2	0.236842	0.138889	0.185185	0.275	0.292683	0.189189	0.193548	0.257143	0.175	0.302326	0.125	0.193548	0.342857	0.25	0.40625	0.322581	0.1875	0.111111	0.235294	0.25	0.184211	0.190476	0.25	0.3125	0.212121	0.241379	0.225806	0.205882	0.148148	0.090909	0.137931	0.147059	0.225806
0.06	0.288462	0.245614	0.214286	0.264151	0.218182	0.153846	0.288462	0.253968	0.188679	0.283333	0.307692	0.25	0.18	0.206897	0.25	0.196429	0.263158	0.2	0.075472	0.266667	0.344828	0.210526	0.169811	0.277778	0.263158	0.265625	0.12963	0.127273	0.309091	0.25	0.320755	0.245283	0.188679	0.078431	0.240741	0.153846	0.22807	0.271186	0.25	0.196429	0.203704	0.12963	0.145455	0.245283	0.098039	0.070175	0.09434	0.142857	0.166667
0.069767	0.22449	0.28	0.196078	0.153846	0.22449	0.214286	0.22449	0.309091	0.244444	0.296296	0.244898	0.288889	0.155556	0.340426	0.235294	0.333333	0.382979	0.229167	0.111111	0.210526	0.245614	0.291667	0.1	0.265306	0.226415	0.254237	0.148936	0.195652	0.27451	0.288889	0.340426	0.134615	0.191489	0.116279	0.363636	0.081633	0.235294	0.236364	0.288889	0.276596	0.288889	0.173913	0.244444	0.372093	0.113636	0.125	0.108696	0.295455	0.272727
0.178571	0.205128	0.243902	0.170732	0.175	0.342857	0.145833	0.342857	0.255319	0.387097	0.23913	0.333333	0.363636	0.181818	0.282051	0.162791	0.27027	0.3	0.314286	0.15625	0.217391	0.234043	0.289474	0.135135	0.361111	0.155556	0.22	0.205882	0.166667	0.3	0.363636	0.315789	0.15	0.131579	0.060606	0.424242	0.111111	0.190476	0.122449	0.184211	0.305556	0.323529	0.205882	0.131579	0.393939	0.058824	0.051282	0.151515	0.375	0.194444
0.129032	0.289474	0.514286	0.315789	0.4	0.361111	0.1875	0.441176	0.418605	0.363636	0.439024	0.470588	0.382353	0.205882	0.444444	0.209302	0.484848	0.421053	0.263158	0.147059	0.414634	0.5	0.342105	0.157895	0.416667	0.173913	0.431818	0.228571	0.333333	0.384615	0.46875	0.625	0.411765	0.363636	0.088235	0.4	0.235294	0.181818	0.163265	0.342857	0.4	0.342857	0.194444	0.40625	0.411765	0.117647	0.102564	0.290323	0.277778	0.285714
0.06	0.116667	0.290909	0.133333	0.116667	0.264151	0.190476	0.240741	0.362069	0.235294	0.241935	0.259259	0.25	0.156863	0.272727	0.147541	0.264151	0.309091	0.222222	0.075472	0.169231	0.238095	0.210526	0.127273	0.232143	0.125	0.246154	0.150943	0.169811	0.220339	0.25	0.320755	0.1	0.166667	0.037736	0.34	0.071429	0.129032	0.153846	0.203704	0.218182	0.25	0.109091	0.211538	0.346939	0.056604	0.070175	0.09434	0.207547	0.211538
0.153846	0.294118	0.371429	0.363636	0.375	0.189189	0.155556	0.294118	0.302326	0.212121	0.317073	0.323529	0.2	0.2	0.27027	0.27027	0.222222	0.289474	0.162162	0.172414	0.358974	0.341463	0.210526	0.181818	0.277778	0.195122	0.26087	0.1875	0.5	0.324324	0.272727	0.382353	0.433333	0.37931	0.103448	0.294118	0.321429	0.236842	0.209302	0.2	0.294118	0.166667	0.225806	0.333333	0.30303	0.137931	0.151515	0.25	0.108108	0.25
0.148148	0.40625	0.25641	0.352941	0.40625	0.216216	0.152174	0.25	0.266667	0.242424	0.341463	0.277778	0.264706	0.193548	0.263158	0.2	0.184211	0.219512	0.157895	0.129032	0.384615	0.333333	0.205128	0.142857	0.305556	0.219512	0.282609	0.21875	0.290323	0.315789	0.228571	0.371429	0.375	0.28125	0.1	0.285714	0.266667	0.2	0.152174	0.264706	0.40625	0.194444	0.21875	0.28125	0.222222	0.096774	0.054054	0.285714	0.166667	0.28125
0.166667	0.139535	0.232558	0.162791	0.113636	0.065217	0.075472	0.113636	0.173077	0	0.229167	0.111111	0.119048	0.051282	0.083333	0.106383	0.139535	0.227273	0.142857	0.258065	0.137255	0.153846	0.159091	0.047619	0.0625	0.058824	0.188679	0.04878	0.1	0.125	0.093023	0.130435	0.090909	0.097561	0.088235	0.113636	0.076923	0.04	0.075472	0.093023	0.139535	0.093023	0.131579	0.153846	0.066667	0.117647	0.162162	0.025641	0.069767	0.097561
0.038462	0.078947	0.071429	0.105263	0.025	0.025	0.166667	0.051282	0.081633	0.027778	0.085106	0.076923	0.114286	0.03125	0.128205	0.128205	0.078947	0.179487	0.025641	0.068966	0.041667	0.04	0.075	0.028571	0.04878	0.121951	0.1	0	0.16129	0.069767	0.026316	0.1	0.052632	0.121212	0.26087	0.108108	0.030303	0.1	0.139535	0.114286	0.138889	0.083333	0.25	0.121212	0.111111	0.304348	0.590909	0.032258	0.085714	0.121212
0.190476	0.56	0.228571	0.25	0.392857	0.258065	0.093023	0.3	0.243902	0.166667	0.25641	0.290323	0.275862	0.192308	0.2	0.272727	0.258065	0.189189	0.117647	0.16	0.297297	0.282051	0.205882	0.172414	0.205882	0.257143	0.232558	0.137931	0.172414	0.294118	0.233333	0.354839	0.357143	0.206897	0.038462	0.258065	0.230769	0.3125	0.236842	0.15625	0.3	0.233333	0.375	0.206897	0.1875	0.037037	0.1	0.25	0.241379	0.206897
0.069767	0.25	0.28	0.22	0.153846	0.333333	0.259259	0.304348	0.358491	0.244444	0.320755	0.326087	0.318182	0.209302	0.340426	0.26	0.363636	0.413043	0.204082	0.086957	0.232143	0.290909	0.347826	0.145833	0.265306	0.27451	0.321429	0.227273	0.195652	0.354167	0.318182	0.369565	0.134615	0.166667	0.066667	0.395349	0.12766	0.235294	0.259259	0.26087	0.304348	0.26087	0.148936	0.244444	0.372093	0.065217	0.102041	0.108696	0.1875	0.272727
0.055556	0.3	0.435897	0.204545	0.3	0.333333	0.176471	0.485714	0.422222	0.411765	0.347826	0.514286	0.351351	0.189189	0.309524	0.222222	0.333333	0.425	0.243902	0.166667	0.355556	0.4	0.317073	0.175	0.35	0.212766	0.346939	0.210526	0.27027	0.540541	0.388889	0.571429	0.307692	0.263158	0.052632	0.368421	0.216216	0.222222	0.22449	0.25	0.333333	0.282051	0.210526	0.263158	0.378378	0.078947	0.095238	0.194444	0.225	0.230769
0.166667	0.191489	0.153846	0.1875	0.166667	0.142857	0.066667	0.142857	0.133333	0.106383	0.118644	0.163265	0.173913	0.116279	0.134615	0.113208	0.12	0.109091	0.145833	0.15	0.160714	0.135593	0.137255	0.085106	0.137255	0.12963	0.129032	0.086957	0.108696	0.150943	0.173913	0.18	0.170213	0.106383	0.047619	0.166667	0.195122	0.134615	0.163636	0.102041	0.166667	0.125	0.162791	0.106383	0.122449	0.046512	0.041667	0.119048	0.12766	0.155556
0.125	0.322581	0.323529	0.2	0.322581	0.242424	0.065217	0.366667	0.261905	0.193548	0.243902	0.354839	0.3	0.178571	0.157895	0.128205	0.205882	0.210526	0.142857	0.24	0.25	0.268293	0.264706	0.16129	0.194444	0.095238	0.25	0.166667	0.125	0.352941	0.344828	0.294118	0.333333	0.15625	0.035714	0.205882	0.307692	0.128205	0.113636	0.114286	0.205882	0.21875	0.296296	0.193548	0.212121	0.034483	0.029412	0.230769	0.225806	0.121212
0	0.32	0.15625	0.172414	0.222222	0.269231	0.171429	0.178571	0.184211	0.26087	0.228571	0.214286	0.291667	0.25	0.333333	0.2	0.269231	0.225806	0.230769	0.095238	0.2	0.189189	0.25	0.166667	0.25	0.1875	0.146341	0.227273	0.272727	0.151515	0.192308	0.241379	0.230769	0.318182	0.105263	0.269231	0.130435	0.241379	0.205882	0.291667	0.269231	0.24	0.35	0.380952	0.28	0.157895	0.125	0.5	0.25	0.318182
0.082192	0.094118	0.197531	0.119048	0.107143	0.148148	0.188235	0.192308	0.22093	0.098765	0.211765	0.189873	0.1375	0.089744	0.103448	0.129412	0.148148	0.225	0.135802	0.106667	0.146067	0.155556	0.158537	0.1	0.130952	0.113636	0.258824	0.115385	0.128205	0.195122	0.151899	0.170732	0.108434	0.085366	0.051948	0.134146	0.131579	0.103448	0.097826	0.109756	0.177215	0.123457	0.115385	0.126582	0.15	0.064935	0.12987	0.05	0.097561	0.1125
0.041667	0.054054	0.075	0.081081	0.026316	0.054054	0.119048	0.026316	0.085106	0	0.088889	0.052632	0.121212	0.033333	0.105263	0.135135	0.083333	0.189189	0.027027	0.074074	0.066667	0.06383	0.108108	0.0625	0.025	0.128205	0.081633	0	0.133333	0.073171	0.057143	0.076923	0.027027	0.129032	0.173913	0.114286	0	0.105263	0.146341	0.121212	0.147059	0.088235	0.32	0.129032	0.117647	0.217391	0.65	0.034483	0.125	0.129032
0	0.2	0.176471	0.193548	0.285714	0.16129	0.189189	0.16129	0.142857	0.28	0.243243	0.193548	0.172414	0.217391	0.3	0.21875	0.2	0.205882	0.206897	0.04	0.216216	0.205128	0.117647	0.192308	0.310345	0.242424	0.136364	0.304348	0.631579	0.171429	0.172414	0.21875	0.296296	0.391304	0.142857	0.285714	0.16	0.21875	0.189189	0.214286	0.241379	0.133333	0.2	0.333333	0.296296	0.136364	0.153846	0.421053	0.137931	0.333333
[truncated: 160 more columns]

## Sheet: target similarity
1	0.0152485	0.0341614	0.0199357	0.0282272	0.0185129	0.0297439	0.0234083	0.0243699	0.0279279	0.0307723	0.0298029	0.0301862	0.0287892	0.0299579	0.0346682	0.0185065	0.0217911	0.0183866	0.0233287	0.0292439	0.0386553	0.0332161	0.189158	0.135415	0.0263759	0.0301861	0.0329698	0.0254352	0.0235879	0.0252636	0.0286797	0.028698	0.0285752	0.0281085	0.026111	0.0292094	0.0272966	0.0244198	0.0307475	0.034892	0.0266678	0.0361337	0.0452913	0.0179825	0.035292	0.0250413	0.0250042	0.0319095	0.0353063
0.0152485	1	0.0162705	0.152869	0.0107992	0.00618437	0.0127872	0.00988341	0.00874603	0.00863494	0.0103268	0.0106275	0.00837209	0.010903	0.0108523	0.0112831	0.00722776	0.00673753	0.00724561	0.010014	0.0110587	0.0102933	0.0101525	0.0146774	0.013862	0.0110241	0.0115151	0.0115625	0.0102649	0.0110186	0.0105976	0.0108453	0.0103185	0.0120458	0.0118926	0.0101977	0.0113194	0.00941699	0.0116566	0.0116604	0.010688	0.0124982	0.0128292	0.0117924	0.00751597	0.0105016	0.00959884	0.010308	0.01177	0.0107837
0.0341614	0.0162705	1	0.0144593	0.0239313	0.0111316	0.020863	0.0241221	0.0183663	0.0168865	0.0198468	0.0165915	0.0175517	0.0204791	0.0166778	0.0182113	0.0130392	0.0144677	0.0152709	0.0272693	0.0174346	0.020498	0.0201354	0.0249511	0.0283217	0.02133	0.0219722	0.0187624	0.0256925	0.0232935	0.029952	0.0174868	0.027219	0.0263282	0.027593	0.0241462	0.019715	0.0159222	0.0254774	0.0205408	0.0167416	0.0155555	0.593988	0.0193307	0.0153502	0.0304128	0.0197923	0.0225298	0.0189156	0.0154554
0.0199357	0.152869	0.0144593	1	0.0121501	0.00988524	0.0129273	0.0118236	0.00984743	0.0111844	0.0135102	0.00968661	0.010512	0.0139749	0.0113019	0.00996777	0.00799956	0.00775712	0.00809303	0.0117834	0.0118973	0.0140731	0.00809697	0.013378	0.0194672	0.00945098	0.00955852	0.0123951	0.00848844	0.0120394	0.0118036	0.0134908	0.013317	0.0127151	0.0133204	0.010631	0.00961198	0.0131179	0.0108661	0.0108859	0.0107768	0.0122817	0.0120588	0.012557	0.00745421	0.0204599	0.0109569	0.0107553	0.0115365	0.0110576
0.0282272	0.0107992	0.0239313	0.0121501	1	0.0108572	0.020684	0.0121971	0.0155488	0.0123618	0.0161433	0.0160596	0.0183316	0.0128718	0.0187055	0.0173127	0.011789	0.0116103	0.0127088	0.0153806	0.0153415	0.0252331	0.0142054	0.0216867	0.0214028	0.0131087	0.0143626	0.0161489	0.0130098	0.014194	0.01491	0.0188068	0.0169369	0.0176676	0.0168655	0.02029	0.0155016	0.0163784	0.0149458	0.0165686	0.0169586	0.0152142	0.020356	0.01782	0.0137782	0.0198368	0.0142315	0.0142104	0.0149089	0.0157614
0.0185129	0.00618437	0.0111316	0.00988524	0.0108572	1	0.0113867	0.00965979	0.00989949	0.00818971	0.0115831	0.0103561	0.0100196	0.0104585	0.00885623	0.00986142	0.00704319	0.00703998	0.00995859	0.0270758	0.0134552	0.0129947	0.0115421	0.0152419	0.0209852	0.00877647	0.0108861	0.00931038	0.0101641	0.0107583	0.0100453	0.0115665	0.00994377	0.0103882	0.00888532	0.0102784	0.0102097	0.0128616	0.0122991	0.0124384	0.0179543	0.0264031	0.0107756	0.0105974	0.00959634	0.0132309	0.00962505	0.0112678	0.0093573	0.00907104
0.0297439	0.0127872	0.020863	0.0129273	0.020684	0.0113867	1	0.422039	0.460225	0.369166	0.419992	0.320172	0.334519	0.3932	0.309529	0.280329	0.0135313	0.0113675	0.0150255	0.0148939	0.145069	0.0796906	0.0184219	0.0289998	0.0262464	0.0901793	0.0928637	0.0820142	0.0838164	0.0862016	0.0928325	0.0796841	0.0855455	0.0806795	0.0846578	0.0619882	0.0831197	0.0835022	0.072747	0.0770532	0.0158381	0.0176387	0.0232788	0.025924	0.0131907	0.0238192	0.088401	0.0951608	0.0863697	0.149481
0.0234083	0.00988341	0.0241221	0.0118236	0.0121971	0.00965979	0.422039	1	0.524241	0.528467	0.443229	0.345186	0.340834	0.447837	0.313493	0.295284	0.0127567	0.012947	0.0148162	0.0177089	0.162167	0.070229	0.017473	0.0297715	0.0250056	0.0776806	0.0706778	0.0694874	0.0736374	0.0710472	0.0839964	0.0923544	0.087394	0.0861383	0.0798586	0.0640291	0.0983304	0.0908213	0.0688804	0.0716294	0.0153726	0.0155564	0.0180975	0.0191942	0.0106331	0.0226569	0.0802518	0.0774316	0.0881873	0.166349
0.0243699	0.00874603	0.0183663	0.00984743	0.0155488	0.00989949	0.460225	0.524241	1	0.442341	0.426061	0.355578	0.346866	0.439745	0.339263	0.312214	0.0120915	0.0106198	0.0154249	0.0144655	0.168203	0.0695572	0.0162418	0.0236685	0.019785	0.0705677	0.0798973	0.0729475	0.0746602	0.0705329	0.0805018	0.0930767	0.0922139	0.0930437	0.0761847	0.0601992	0.103287	0.0997712	0.0808647	0.083593	0.0144653	0.0173952	0.0158855	0.0235091	0.010857	0.0213196	0.0822971	0.0852995	0.101679	0.171962
0.0279279	0.00863494	0.0168865	0.0111844	0.0123618	0.00818971	0.369166	0.528467	0.442341	1	0.382077	0.287846	0.277466	0.375198	0.261392	0.250632	0.0138331	0.0135306	0.0179704	0.0142817	0.146649	0.0624923	0.02353	0.0219038	0.0248365	0.0769566	0.0764374	0.0754026	0.0717647	0.0725075	0.0772484	0.0786937	0.0763001	0.0770552	0.0820998	0.0625169	0.0823326	0.0786437	0.0603816	0.0672031	0.0127783	0.0124521	0.0143592	0.0211134	0.0110952	0.0260459	0.0630242	0.0673469	0.0845369	0.153525
0.0307723	0.0103268	0.0198468	0.0135102	0.0161433	0.0115831	0.419992	0.443229	0.426061	0.382077	1	0.289892	0.308944	0.380465	0.292008	0.266545	0.0129654	0.0108138	0.0123011	0.0182578	0.157398	0.0574451	0.0155138	0.0251586	0.0259471	0.0797495	0.0849194	0.0766793	0.070387	0.0823024	0.0783356	0.0829215	0.0890378	0.0867504	0.0761437	0.0554885	0.0726539	0.0723508	0.0760361	0.0739892	0.0182138	0.0165034	0.0226298	0.0203399	0.0119352	0.0211929	0.0815451	0.0781801	0.0816589	0.16934
0.0298029	0.0106275	0.0165915	0.00968661	0.0160596	0.0103561	0.320172	0.345186	0.355578	0.287846	0.289892	1	0.271218	0.327173	0.252165	0.226575	0.0148187	0.0104463	0.0136337	0.0203673	0.164224	0.0723088	0.0166156	0.0277167	0.0235591	0.0675724	0.0736222	0.0663967	0.0576835	0.0567942	0.0670761	0.0833981	0.0894984	0.0845996	0.0811596	0.0583494	0.0859692	0.0733798	0.0618342	0.0689175	0.0254307	0.015931	0.0207137	0.0196564	0.0106797	0.0240949	0.079414	0.0792962	0.0797206	0.169754
0.0301862	0.00837209	0.0175517	0.010512	0.0183316	0.0100196	0.334519	0.340834	0.346866	0.277466	0.308944	0.271218	1	0.372142	0.370122	0.363655	0.0152068	0.0174988	0.0135863	0.0163903	0.163527	0.0669385	0.0171529	0.029196	0.0254183	0.0895958	0.0814909	0.0814243	0.0763802	0.0805343	0.0893267	0.0826341	0.0875868	0.0841628	0.0878724	0.0699249	0.0742874	0.0746293	0.0808709	0.0871797	0.0168651	0.0149406	0.0239246	0.0284974	0.0114533	0.0271163	0.0953998	0.106776	0.098027	0.164329
0.0287892	0.010903	0.0204791	0.0139749	0.0128718	0.0104585	0.3932	0.447837	0.439745	0.375198	0.380465	0.327173	0.372142	1	0.379515	0.318495	0.0114209	0.0107525	0.0111037	0.0149335	0.161492	0.0663499	0.0161346	0.0302301	0.0227578	0.090264	0.0966243	0.0811859	0.0724624	0.0905295	0.0856154	0.0823922	0.087941	0.0823961	0.0756818	0.068845	0.0868196	0.0872191	0.0797246	0.0839373	0.015287	0.0148969	0.0286254	0.0214077	0.0135346	0.0202777	0.0842407	0.0813222	0.0754588	0.170523
0.0299579	0.0108523	0.0166778	0.0113019	0.0187055	0.00885623	0.309529	0.313493	0.339263	0.261392	0.292008	0.252165	0.370122	0.379515	1	0.424664	0.0111718	0.015751	0.0123783	0.015425	0.150211	0.0679955	0.0202352	0.0217314	0.0200779	0.0808911	0.0802503	0.0670413	0.0758028	0.0663473	0.0855299	0.071986	0.076287	0.0720264	0.0668907	0.0574914	0.0752366	0.0786182	0.0618541	0.0657081	0.0234327	0.0133449	0.0204561	0.0205334	0.0149452	0.0237716	0.0693072	0.0735296	0.0759953	0.147684
0.0346682	0.0112831	0.0182113	0.00996777	0.0173127	0.00986142	0.280329	0.295284	0.312214	0.250632	0.266545	0.226575	0.363655	0.318495	0.424664	1	0.0108347	0.0159176	0.0133506	0.0143551	0.127773	0.0564058	0.020386	0.0233874	0.0221349	0.0723783	0.0642515	0.0591324	0.0613847	0.0593904	0.0613539	0.0693391	0.070939	0.0666081	0.0707161	0.0680686	0.0649565	0.0658768	0.0667178	0.0633087	0.0152651	0.0191257	0.0201931	0.0178473	0.0122826	0.0252534	0.0589138	0.0645192	0.0790074	0.128615
0.0185065	0.00722776	0.0130392	0.00799956	0.011789	0.00704319	0.0135313	0.0127567	0.0120915	0.0138331	0.0129654	0.0148187	0.0152068	0.0114209	0.0111718	0.0108347	1	0.443489	0.00927228	0.0172674	0.0171829	0.0169212	0.0115176	0.0154571	0.015326	0.0110712	0.0120423	0.0117447	0.0120562	0.0135712	0.0137278	0.0135633	0.0131607	0.0124901	0.0133234	0.0176808	0.0128793	0.0106794	0.0130652	0.0104605	0.0125598	0.0124399	0.0155703	0.0141547	0.00882988	0.0191181	0.0161191	0.0188126	0.0140047	0.0120558
0.0217911	0.00673753	0.0144677	0.00775712	0.0116103	0.00703998	0.0113675	0.012947	0.0106198	0.0135306	0.0108138	0.0104463	0.0174988	0.0107525	0.015751	0.0159176	0.443489	1	0.0112481	0.010948	0.0146809	0.0217924	0.0158967	0.0221403	0.0172258	0.0111915	0.0117541	0.0121006	0.0147875	0.0109708	0.0143613	0.0135508	0.0112289	0.0118137	0.0178669	0.0133588	0.0122164	0.0101566	0.0117784	0.0138863	0.0167588	0.00971593	0.0157874	0.0129632	0.00851048	0.0150075	0.0148821	0.0127064	0.0154596	0.0170527
0.0183866	0.00724561	0.0152709	0.00809303	0.0127088	0.00995859	0.0150255	0.0148162	0.0154249	0.0179704	0.0123011	0.0136337	0.0135863	0.0111037	0.0123783	0.0133506	0.00927228	0.0112481	1	0.0145518	0.0129978	0.0125235	0.0137246	0.0187077	0.0164987	0.0138994	0.0109601	0.0118752	0.0118702	0.0127152	0.0109564	0.0129787	0.0125232	0.011546	0.0145488	0.0148442	0.0115277	0.0125072	0.0186485	0.0131583	0.0137002	0.0149345	0.0170024	0.0159634	0.00931569	0.0219032	0.0129849	0.0120226	0.0148916	0.0122136
0.0233287	0.010014	0.0272693	0.0117834	0.0153806	0.0270758	0.0148939	0.0177089	0.0144655	0.0142817	0.0182578	0.0203673	0.0163903	0.0149335	0.015425	0.0143551	0.0172674	0.010948	0.0145518	1	0.0158917	0.0177813	0.0164807	0.0253546	0.0279111	0.012554	0.0136038	0.0173852	0.0145131	0.0140416	0.0160169	0.0158792	0.0164778	0.0169933	0.0136176	0.0137743	0.0122861	0.0132242	0.0134371	0.0143923	0.254259	0.314952	0.0261698	0.0191289	0.0173219	0.0186718	0.0173737	0.0140578	0.0131688	0.0134498
0.0292439	0.0110587	0.0174346	0.0118973	0.0153415	0.0134552	0.145069	0.162167	0.168203	0.146649	0.157398	0.164224	0.163527	0.161492	0.150211	0.127773	0.0171829	0.0146809	0.0129978	0.0158917	1	0.41111	0.0188869	0.0279997	0.0225668	0.0729497	0.0807906	0.0764759	0.0762049	0.0791823	0.0800959	0.0818337	0.081236	0.074741	0.0952421	0.0859904	0.0826992	0.0827552	0.109679	0.106489	0.0169187	0.0161698	0.0218703	0.019882	0.0101271	0.0206198	0.0731062	0.074319	0.0907335	0.738129
0.0386553	0.0102933	0.020498	0.0140731	0.0252331	0.0129947	0.0796906	0.070229	0.0695572	0.0624923	0.0574451	0.0723088	0.0669385	0.0663499	0.0679955	0.0564058	0.0169212	0.0217924	0.0125235	0.0177813	0.41111	1	0.0194976	0.0285633	0.0305569	0.029987	0.0290646	0.0302801	0.0278532	0.0287234	0.0307391	0.0323689	0.0258297	0.0281686	0.0463817	0.0466108	0.0248634	0.0221115	0.0374459	0.0264711	0.0197049	0.0212022	0.0246381	0.0271763	0.0153334	0.0229916	0.0446597	0.0445934	0.0251302	0.508441
0.0332161	0.0101525	0.0201354	0.00809697	0.0142054	0.0115421	0.0184219	0.017473	0.0162418	0.02353	0.0155138	0.0166156	0.0171529	0.0161346	0.0202352	0.020386	0.0115176	0.0158967	0.0137246	0.0164807	0.0188869	0.0194976	1	0.0308909	0.0205492	0.0154045	0.014195	0.0159284	0.0178757	0.0150548	0.0141902	0.0144812	0.0148274	0.0134218	0.0207941	0.0177067	0.0164158	0.0161548	0.016058	0.0128567	0.0168709	0.0170979	0.0182257	0.0197597	0.0107359	0.0198921	0.017839	0.0171274	0.0177045	0.0170778
0.189158	0.0146774	0.0249511	0.013378	0.0216867	0.0152419	0.0289998	0.0297715	0.0236685	0.0219038	0.0251586	0.0277167	0.029196	0.0302301	0.0217314	0.0233874	0.0154571	0.0221403	0.0187077	0.0253546	0.0279997	0.0285633	0.0308909	1	0.0970454	0.0249427	0.0198208	0.0230276	0.0239385	0.0195882	0.0198142	0.0280437	0.0304001	0.0320164	0.0348718	0.021782	0.0337095	0.0356162	0.0330814	0.0308827	0.0292682	0.0222465	0.028808	0.0417319	0.0161956	0.0276076	0.032138	0.0297132	0.0290081	0.0243988
0.135415	0.013862	0.0283217	0.0194672	0.0214028	0.0209852	0.0262464	0.0250056	0.019785	0.0248365	0.0259471	0.0235591	0.0254183	0.0227578	0.0200779	0.0221349	0.015326	0.0172258	0.0164987	0.0279111	0.0225668	0.0305569	0.0205492	0.0970454	1	0.0290804	0.0294113	0.02819	0.0346836	0.0290661	0.0327299	0.020512	0.0232258	0.0225886	0.0216642	0.0247688	0.02309	0.0231962	0.0257384	0.023249	0.0335311	0.0295132	0.0285636	0.0302945	0.0172078	0.0350721	0.0296927	0.0269034	0.0194438	0.0220056
0.0263759	0.0110241	0.02133	0.00945098	0.0131087	0.00877647	0.0901793	0.0776806	0.0705677	0.0769566	0.0797495	0.0675724	0.0895958	0.090264	0.0808911	0.0723783	0.0110712	0.0111915	0.0138994	0.012554	0.0729497	0.029987	0.0154045	0.0249427	0.0290804	1	0.7488	0.667308	0.485642	0.694952	0.55692	0.288758	0.294773	0.286094	0.283499	0.308844	0.404473	0.375277	0.256297	0.248435	0.0178387	0.0154871	0.0179086	0.023123	0.0136849	0.0200772	0.314593	0.316431	0.229118	0.069848
0.0301861	0.0115151	0.0219722	0.00955852	0.0143626	0.0108861	0.0928637	0.0706778	0.0798973	0.0764374	0.0849194	0.0736222	0.0814909	0.0966243	0.0802503	0.0642515	0.0120423	0.0117541	0.0109601	0.0136038	0.0807906	0.0290646	0.014195	0.0198208	0.0294113	0.7488	1	0.675547	0.475924	0.7155	0.553836	0.305795	0.307628	0.306965	0.288747	0.312671	0.394419	0.372021	0.274824	0.263761	0.0173857	0.0153436	0.0161437	0.01921	0.0122524	0.021756	0.327844	0.324028	0.240012	0.0680385
0.0329698	0.0115625	0.0187624	0.0123951	0.0161489	0.00931038	0.0820142	0.0694874	0.0729475	0.0754026	0.0766793	0.0663967	0.0814243	0.0811859	0.0670413	0.0591324	0.0117447	0.0121006	0.0118752	0.0173852	0.0764759	0.0302801	0.0159284	0.0230276	0.02819	0.667308	0.675547	1	0.485968	0.676225	0.549221	0.286194	0.292342	0.291405	0.274173	0.308087	0.403015	0.375704	0.266218	0.253423	0.0210655	0.0147065	0.0173603	0.0196132	0.012831	0.0203893	0.303682	0.299082	0.219048	0.0686456
0.0254352	0.0102649	0.0256925	0.00848844	0.0130098	0.0101641	0.0838164	0.0736374	0.0746602	0.0717647	0.070387	0.0576835	0.0763802	0.0724624	0.0758028	0.0613847	0.0120562	0.0147875	0.0118702	0.0145131	0.0762049	0.0278532	0.0178757	0.0239385	0.0346836	0.485642	0.475924	0.485968	1	0.474555	0.605296	0.271951	0.272124	0.263278	0.26277	0.299097	0.364939	0.348539	0.238922	0.236595	0.017828	0.0150566	0.019973	0.027614	0.0113038	0.0153275	0.26464	0.273598	0.226644	0.0690019
0.0235879	0.0110186	0.0232935	0.0120394	0.014194	0.0107583	0.0862016	0.0710472	0.0705329	0.0725075	0.0823024	0.0567942	0.0805343	0.0905295	0.0663473	0.0593904	0.0135712	0.0109708	0.0127152	0.0140416	0.0791823	0.0287234	0.0150548	0.0195882	0.0290661	0.694952	0.7155	0.676225	0.474555	1	0.558308	0.293793	0.292685	0.30046	0.295679	0.31395	0.395583	0.379942	0.267098	0.266366	0.0175058	0.0138999	0.0171216	0.0218735	0.0145751	0.0200673	0.308505	0.313642	0.21672	0.0662746
0.0252636	0.0105976	0.029952	0.0118036	0.01491	0.0100453	0.0928325	0.0839964	0.0805018	0.0772484	0.0783356	0.0670761	0.0893267	0.0856154	0.0855299	0.0613539	0.0137278	0.0143613	0.0109564	0.0160169	0.0800959	0.0307391	0.0141902	0.0198142	0.0327299	0.55692	0.553836	0.549221	0.605296	0.558308	1	0.292928	0.28591	0.289252	0.286292	0.33697	0.433682	0.401007	0.283835	0.282895	0.0173798	0.0153385	0.0192872	0.0166987	0.0127019	0.0207821	0.315065	0.319258	0.251402	0.0751751
0.0286797	0.0108453	0.0174868	0.0134908	0.0188068	0.0115665	0.0796841	0.0923544	0.0930767	0.0786937	0.0829215	0.0833981	0.0826341	0.0823922	0.071986	0.0693391	0.0135633	0.0135508	0.0129787	0.0158792	0.0818337	0.0323689	0.0144812	0.0280437	0.020512	0.288758	0.305795	0.286194	0.271951	0.293793	0.292928	1	0.80051	0.778999	0.384433	0.262431	0.312692	0.290579	0.336293	0.327019	0.0137205	0.0130594	0.0202993	0.0199046	0.0130216	0.0225733	0.308519	0.317779	0.296093	0.0763154
0.028698	0.0103185	0.027219	0.013317	0.0169369	0.00994377	0.0855455	0.087394	0.0922139	0.0763001	0.0890378	0.0894984	0.0875868	0.087941	0.076287	0.070939	0.0131607	0.0112289	0.0125232	0.0164778	0.081236	0.0258297	0.0148274	0.0304001	0.0232258	0.294773	0.307628	0.292342	0.272124	0.292685	0.28591	0.80051	1	0.810295	0.378775	0.258029	0.307186	0.30223	0.343789	0.334714	0.015645	0.0152457	0.0164797	0.0174784	0.0150175	0.021176	0.314558	0.315388	0.277357	0.0769977
0.0285752	0.0120458	0.0263282	0.0127151	0.0176676	0.0103882	0.0806795	0.0861383	0.0930437	0.0770552	0.0867504	0.0845996	0.0841628	0.0823961	0.0720264	0.0666081	0.0124901	0.0118137	0.011546	0.0169933	0.074741	0.0281686	0.0134218	0.0320164	0.0225886	0.286094	0.306965	0.291405	0.263278	0.30046	0.289252	0.778999	0.810295	1	0.378135	0.255409	0.302715	0.293326	0.354296	0.337941	0.0146243	0.0148706	0.0148828	0.0190226	0.0118747	0.025771	0.310304	0.316298	0.282967	0.0716203
0.0281085	0.0118926	0.027593	0.0133204	0.0168655	0.00888532	0.0846578	0.0798586	0.0761847	0.0820998	0.0761437	0.0811596	0.0878724	0.0756818	0.0668907	0.0707161	0.0133234	0.0178669	0.0145488	0.0136176	0.0952421	0.0463817	0.0207941	0.0348718	0.0216642	0.283499	0.288747	0.274173	0.26277	0.295679	0.286292	0.384433	0.378775	0.378135	1	0.261293	0.322766	0.295101	0.341518	0.331077	0.0170749	0.0140792	0.0177366	0.0171393	0.0124919	0.021778	0.321833	0.325689	0.251422	0.0886373
0.026111	0.0101977	0.0241462	0.010631	0.02029	0.0102784	0.0619882	0.0640291	0.0601992	0.0625169	0.0554885	0.0583494	0.0699249	0.068845	0.0574914	0.0680686	0.0176808	0.0133588	0.0148442	0.0137743	0.0859904	0.0466108	0.0177067	0.021782	0.0247688	0.308844	0.312671	0.308087	0.299097	0.31395	0.33697	0.262431	0.258029	0.255409	0.261293	1	0.409161	0.418345	0.244665	0.2399	0.0134212	0.0154566	0.0172084	0.0198045	0.0147689	0.0256252	0.252753	0.254236	0.200952	0.0899062
0.0292094	0.0113194	0.019715	0.00961198	0.0155016	0.0102097	0.0831197	0.0983304	0.103287	0.0823326	0.0726539	0.0859692	0.0742874	0.0868196	0.0752366	0.0649565	0.0128793	0.0122164	0.0115277	0.0122861	0.0826992	0.0248634	0.0164158	0.0337095	0.02309	0.404473	0.394419	0.403015	0.364939	0.395583	0.433682	0.312692	0.307186	0.302715	0.322766	0.409161	1	0.689258	0.276948	0.261429	0.0209496	0.0136099	0.0240036	0.0173762	0.0144906	0.0261982	0.292065	0.291631	0.230704	0.0790676
0.0272966	0.00941699	0.0159222	0.0131179	0.0163784	0.0128616	0.0835022	0.0908213	0.0997712	0.0786437	0.0723508	0.0733798	0.0746293	0.0872191	0.0786182	0.0658768	0.0106794	0.0101566	0.0125072	0.0132242	0.0827552	0.0221115	0.0161548	0.0356162	0.0231962	0.375277	0.372021	0.375704	0.348539	0.379942	0.401007	0.290579	0.30223	0.293326	0.295101	0.418345	0.689258	1	0.270318	0.262009	0.0162628	0.0152263	0.0222002	0.0194859	0.013675	0.0244389	0.284007	0.283585	0.229597	0.0848112
0.0244198	0.0116566	0.0254774	0.0108661	0.0149458	0.0122991	0.072747	0.0688804	0.0808647	0.0603816	0.0760361	0.0618342	0.0808709	0.0797246	0.0618541	0.0667178	0.0130652	0.0117784	0.0186485	0.0134371	0.109679	0.0374459	0.016058	0.0330814	0.0257384	0.256297	0.274824	0.266218	0.238922	0.267098	0.283835	0.336293	0.343789	0.354296	0.341518	0.244665	0.276948	0.270318	1	0.683152	0.020603	0.0151351	0.019404	0.0201763	0.0138124	0.025694	0.30712	0.306664	0.264565	0.100661
0.0307475	0.0116604	0.0205408	0.0108859	0.0165686	0.0124384	0.0770532	0.0716294	0.083593	0.0672031	0.0739892	0.0689175	0.0871797	0.0839373	0.0657081	0.0633087	0.0104605	0.0138863	0.0131583	0.0143923	0.106489	0.0264711	0.0128567	0.0308827	0.023249	0.248435	0.263761	0.253423	0.236595	0.266366	0.282895	0.327019	0.334714	0.337941	0.331077	0.2399	0.261429	0.262009	0.683152	1	0.0184281	0.0143053	0.0183708	0.0159053	0.015123	0.0239378	0.292474	0.299016	0.256149	0.0877219
0.034892	0.010688	0.0167416	0.0107768	0.0169586	0.0179543	0.0158381	0.0153726	0.0144653	0.0127783	0.0182138	0.0254307	0.0168651	0.015287	0.0234327	0.0152651	0.0125598	0.0167588	0.0137002	0.254259	0.0169187	0.0197049	0.0168709	0.0292682	0.0335311	0.0178387	0.0173857	0.0210655	0.017828	0.0175058	0.0173798	0.0137205	0.015645	0.0146243	0.0170749	0.0134212	0.0209496	0.0162628	0.020603	0.0184281	1	0.293153	0.0211057	0.0227917	0.0210072	0.0230877	0.0188521	0.0184996	0.0161532	0.0158634
0.0266678	0.0124982	0.0155555	0.0122817	0.0152142	0.0264031	0.0176387	0.0155564	0.0173952	0.0124521	0.0165034	0.015931	0.0149406	0.0148969	0.0133449	0.0191257	0.0124399	0.00971593	0.0149345	0.314952	0.0161698	0.0212022	0.0170979	0.0222465	0.0295132	0.0154871	0.0153436	0.0147065	0.0150566	0.0138999	0.0153385	0.0130594	0.0152457	0.0148706	0.0140792	0.0154566	0.0136099	0.0152263	0.0151351	0.0143053	0.293153	1	0.0172015	0.0158642	0.0211175	0.0289266	0.015837	0.0135996	0.0133193	0.0148402
0.0361337	0.0128292	0.593988	0.0120588	0.020356	0.0107756	0.0232788	0.0180975	0.0158855	0.0143592	0.0226298	0.0207137	0.0239246	0.0286254	0.0204561	0.0201931	0.0155703	0.0157874	0.0170024	0.0261698	0.0218703	0.0246381	0.0182257	0.028808	0.0285636	0.0179086	0.0161437	0.0173603	0.019973	0.0171216	0.0192872	0.0202993	0.0164797	0.0148828	0.0177366	0.0172084	0.0240036	0.0222002	0.019404	0.0183708	0.0211057	0.0172015	1	0.0224724	0.016722	0.0209262	0.0245797	0.0202579	0.0193893	0.0201839
0.0452913	0.0117924	0.0193307	0.012557	0.01782	0.0105974	0.025924	0.0191942	0.0235091	0.0211134	0.0203399	0.0196564	0.0284974	0.0214077	0.0205334	0.0178473	0.0141547	0.0129632	0.0159634	0.0191289	0.019882	0.0271763	0.0197597	0.0417319	0.0302945	0.023123	0.01921	0.0196132	0.027614	0.0218735	0.0166987	0.0199046	0.0174784	0.0190226	0.0171393	0.0198045	0.0173762	0.0194859	0.0201763	0.0159053	0.0227917	0.0158642	0.0224724	1	0.0140757	0.287326	0.0186208	0.0256173	0.0205643	0.0185797
0.0179825	0.00751597	0.0153502	0.00745421	0.0137782	0.00959634	0.0131907	0.0106331	0.010857	0.0110952	0.0119352	0.0106797	0.0114533	0.0135346	0.0149452	0.0122826	0.00882988	0.00851048	0.00931569	0.0173219	0.0101271	0.0153334	0.0107359	0.0161956	0.0172078	0.0136849	0.0122524	0.012831	0.0113038	0.0145751	0.0127019	0.0130216	0.0150175	0.0118747	0.0124919	0.0147689	0.0144906	0.013675	0.0138124	0.015123	0.0210072	0.0211175	0.016722	0.0140757	1	0.01434	0.0141639	0.0139184	0.0131068	0.011192
0.035292	0.0105016	0.0304128	0.0204599	0.0198368	0.0132309	0.0238192	0.0226569	0.0213196	0.0260459	0.0211929	0.0240949	0.0271163	0.0202777	0.0237716	0.0252534	0.0191181	0.0150075	0.0219032	0.0186718	0.0206198	0.0229916	0.0198921	0.0276076	0.0350721	0.0200772	0.021756	0.0203893	0.0153275	0.0200673	0.0207821	0.0225733	0.021176	0.025771	0.021778	0.0256252	0.0261982	0.0244389	0.025694	0.0239378	0.0230877	0.0289266	0.0209262	0.287326	0.01434	1	0.0244317	0.0239171	0.024723	0.0182366
0.0250413	0.00959884	0.0197923	0.0109569	0.0142315	0.00962505	0.088401	0.0802518	0.0822971	0.0630242	0.0815451	0.079414	0.0953998	0.0842407	0.0693072	0.0589138	0.0161191	0.0148821	0.0129849	0.0173737	0.0731062	0.0446597	0.017839	0.032138	0.0296927	0.314593	0.327844	0.303682	0.26464	0.308505	0.315065	0.308519	0.314558	0.310304	0.321833	0.252753	0.292065	0.284007	0.30712	0.292474	0.0188521	0.015837	0.0245797	0.0186208	0.0141639	0.0244317	1	0.769181	0.380892	0.072901
0.0250042	0.010308	0.0225298	0.0107553	0.0142104	0.0112678	0.0951608	0.0774316	0.0852995	0.0673469	0.0781801	0.0792962	0.106776	0.0813222	0.0735296	0.0645192	0.0188126	0.0127064	0.0120226	0.0140578	0.074319	0.0445934	0.0171274	0.0297132	0.0269034	0.316431	0.324028	0.299082	0.273598	0.313642	0.319258	0.317779	0.315388	0.316298	0.325689	0.254236	0.291631	0.283585	0.306664	0.299016	0.0184996	0.0135996	0.0202579	0.0256173	0.0139184	0.0239171	0.769181	1	0.399249	0.0744033
0.0319095	0.01177	0.0189156	0.0115365	0.0149089	0.0093573	0.0863697	0.0881873	0.101679	0.0845369	0.0816589	0.0797206	0.098027	0.0754588	0.0759953	0.0790074	0.0140047	0.0154596	0.0148916	0.0131688	0.0907335	0.0251302	0.0177045	0.0290081	0.0194438	0.229118	0.240012	0.219048	0.226644	0.21672	0.251402	0.296093	0.277357	0.282967	0.251422	0.200952	0.230704	0.229597	0.264565	0.256149	0.0161532	0.0133193	0.0193893	0.0205643	0.0131068	0.024723	0.380892	0.399249	1	0.0863191
0.0353063	0.0107837	0.0154554	0.0110576	0.0157614	0.00907104	0.149481	0.166349	0.171962	0.153525	0.16934	0.169754	0.164329	0.170523	0.147684	0.128615	0.0120558	0.0170527	0.0122136	0.0134498	0.738129	0.508441	0.0170778	0.0243988	0.0220056	0.069848	0.0680385	0.0686456	0.0690019	0.0662746	0.0751751	0.0763154	0.0769977	0.0716203	0.0886373	0.0899062	0.0790676	0.0848112	0.100661	0.0877219	0.0158634	0.0148402	0.0201839	0.0185797	0.011192	0.0182366	0.072901	0.0744033	0.0863191	1
0.0201996	0.00756831	0.0126166	0.00710289	0.0108552	0.00787505	0.0130346	0.011283	0.00930854	0.0095934	0.0119655	0.0119907	0.0123657	0.011669	0.0153402	0.0114414	0.0925208	0.0905884	0.0102002	0.0110324	0.0138235	0.0186241	0.012149	0.0248703	0.017915	0.0114446	0.0127559	0.011547	0.0124103	0.0126062	0.0122793	0.013327	0.0142552	0.0135074	0.0137147	0.0118614	0.0121146	0.0172222	0.0148365	0.014395	0.0179569	0.0174986	0.0129879	0.0134818	0.00955428	0.015608	0.0189592	0.0161265	0.0127507	0.00982421
0.0221126	0.00876699	0.0154438	0.0108681	0.0110731	0.00779329	0.0123464	0.0108579	0.0106257	0.00938649	0.0147876	0.0120089	0.0126138	0.0139244	0.0114007	0.0121286	0.0912013	0.0945879	0.0085286	0.0110374	0.0109939	0.0129668	0.0166064	0.0257994	0.01748	0.012389	0.0113252	0.0120097	0.0122228	0.0114304	0.012044	0.0124225	0.0124304	0.0147126	0.017608	0.0120994	0.0125909	0.0170994	0.0135044	0.0123895	0.0150295	0.0205958	0.0129666	0.0155462	0.00877141	0.0152289	0.0167133	0.0154965	0.0125502	0.00955525
0.0193755	0.00801989	0.0144189	0.00756042	0.0109464	0.00841525	0.0140828	0.0120217	0.0107276	0.00987135	0.0113698	0.0127509	0.0133601	0.0115449	0.0103863	0.0128947	0.0870178	0.0870355	0.00876823	0.0139063	0.0132307	0.014607	0.0144562	0.0191281	0.0188508	0.0134248	0.0114338	0.0116439	0.0118672	0.0108287	0.0111918	0.012512	0.0104334	0.0136208	0.015022	0.0130685	0.0133688	0.0150512	0.0133499	0.0122477	0.0150897	0.019229	0.0150475	0.013595	0.0102768	0.0136861	0.0141617	0.013198	0.0115043	0.0122105
0.0242417	0.00798631	0.0149216	0.00792501	0.0109005	0.00826198	0.012154	0.0117576	0.0133534	0.0119926	0.0127086	0.0109461	0.012639	0.0108333	0.0118832	0.013066	0.0862067	0.0872846	0.00973899	0.0129959	0.0108226	0.0148427	0.0178115	0.0258206	0.0172076	0.0119614	0.0118603	0.0129593	0.0148256	0.0121899	0.0158874	0.0122289	0.0170852	0.0135637	0.0178084	0.013896	0.0121652	0.0175246	0.0137524	0.0167136	0.01572	0.0184726	0.013042	0.013538	0.0139115	0.0146509	0.0136323	0.0154896	0.0112315	0.0117006
0.0181838	0.00934758	0.0180427	0.00871367	0.0108234	0.00789767	0.0123355	0.0126926	0.013214	0.0120435	0.0121949	0.010316	0.0125384	0.0122933	0.0118214	0.0161355	0.0806835	0.0785018	0.00981143	0.0106416	0.0157429	0.0142682	0.0126472	0.0203451	0.0187971	0.0123781	0.0136367	0.0107135	0.0109348	0.0112673	0.0118443	0.0143519	0.0110972	0.0112664	0.0105176	0.0108096	0.0118976	0.0156467	0.0108007	0.0114944	0.0124186	0.0125263	0.0143835	0.0177514	0.0138643	0.0166976	0.0110756	0.0130498	0.0114318	0.0129731
0.0186139	0.0072697	0.0156104	0.00902371	0.0127201	0.00841406	0.0127282	0.0139697	0.0114586	0.0128474	0.0123542	0.0117049	0.0116359	0.0129153	0.0104585	0.0107064	0.0947895	0.087789	0.00914399	0.0120237	0.0146758	0.014696	0.0113544	0.0180215	0.0174247	0.0120754	0.0117431	0.0108053	0.0123389	0.0104447	0.0110348	0.0134788	0.0121158	0.0127468	0.0105795	0.0128851	0.0120449	0.0132419	0.0127087	0.0138649	0.0121313	0.0113755	0.0189576	0.015444	0.00997429	0.0165302	0.0121013	0.0134776	0.0126773	0.0120393
0.0246787	0.00719661	0.0151676	0.00975139	0.0126229	0.00847822	0.0130584	0.0119434	0.011768	0.0105916	0.0124484	0.011139	0.0126095	0.013896	0.0118555	0.0130355	0.0961065	0.0912132	0.00938124	0.0119028	0.0143182	0.0151043	0.0121712	0.0194258	0.0179478	0.0107635	0.0134892	0.0124754	0.0117899	0.014968	0.0120652	0.0145024	0.0145116	0.0144495	0.0118446	0.0140837	0.0105338	0.0161035	0.012577	0.012168	0.0122238	0.0123613	0.0143958	0.0155618	0.00957175	0.0197156	0.0119591	0.0131121	0.0116535	0.0139622
0.0190074	0.00723304	0.0185825	0.00871797	0.0132312	0.008953	0.0131245	0.0111615	0.0107431	0.0104585	0.0132025	0.0142339	0.012451	0.0139391	0.0106226	0.0104305	0.0912315	0.0885554	0.0102558	0.0111236	0.012284	0.0149144	0.0153833	0.0187646	0.0161811	0.0122456	0.0119176	0.0125426	0.0131234	0.010623	0.0135487	0.0115924	0.0129645	0.0115502	0.0130992	0.0112991	0.0104014	0.0118122	0.0130962	0.0122375	0.0118424	0.0133155	0.0153083	0.0165259	0.00929391	0.0171182	0.0115772	0.0129472	0.0121708	0.0135606
0.0201169	0.00773198	0.0139012	0.00856778	0.0154532	0.00719899	0.011767	0.0115901	0.0120663	0.00989765	0.0131987	0.0146245	0.0115925	0.0134849	0.0129962	0.0174482	0.0772631	0.0804951	0.012355	0.011757	0.012528	0.0149448	0.0144096	0.0200806	0.0200672	0.0118075	0.0112529	0.0140874	0.0124813	0.0140713	0.0121675	0.0116161	0.0127411	0.0115738	0.0124138	0.0119587	0.0122222	0.0125017	0.0146459	0.0139947	0.0127574	0.0135223	0.0150446	0.0156713	0.0100627	0.0168233	0.0120604	0.0118153	0.0115262	0.0146597
0.0204002	0.00704091	0.0134992	0.00683978	0.0108265	0.0071306	0.0109828	0.011275	0.011098	0.0143284	0.0139597	0.0121763	0.0136087	0.0131448	0.0118176	0.0138259	0.0792419	0.0806131	0.00982235	0.0136883	0.0126346	0.0176496	0.0154426	0.0211076	0.0206267	0.0119203	0.011601	0.0132995	0.0107143	0.0119144	0.0125067	0.0126121	0.0132843	0.0123457	0.0177606	0.0173446	0.0123262	0.0132674	0.0127484	0.0127788	0.0119712	0.0118817	0.0146356	0.0127002	0.0115005	0.0156833	0.0135236	0.011478	0.0129246	0.0140804
0.0200026	0.00885366	0.0139442	0.00894506	0.0110181	0.00715809	0.0122851	0.00993968	0.0148472	0.0111284	0.014247	0.0143834	0.0143442	0.019889	0.0131236	0.0118407	0.146883	0.146837	0.0137477	0.0122747	0.0130796	0.0174033	0.0120847	0.0196813	0.0205556	0.013987	0.0160642	0.0133289	0.0138996	0.0135062	0.0158191	0.0184246	0.0158693	0.0148719	0.0110403	0.0158295	0.0129924	0.012353	0.0148274	0.012328	0.0154222	0.0127515	0.0143046	0.0136841	0.0103441	0.0144645	0.0130667	0.0137589	0.0133961	0.0129863
0.0185135	0.00813431	0.0149255	0.00741417	0.00910525	0.00588908	0.0122088	0.010333	0.00989	0.00965619	0.00990785	0.00853375	0.0096807	0.0118931	0.00909282	0.00930834	0.13372	0.116962	0.0107345	0.00863696	0.00953802	0.0120345	0.00894041	0.0151801	0.0173789	0.0124337	0.0114657	0.00939429	0.0103857	0.0118793	0.0131256	0.0100735	0.0113399	0.010933	0.014254	0.0103177	0.00984206	0.00916827	0.0100068	0.0100368	0.0127963	0.00930834	0.0134128	0.014914	0.00735509	0.0148753	0.0108112	0.012259	0.0131344	0.010374
0.0168193	0.00547402	0.0132696	0.0069398	0.00827201	0.00620132	0.0131834	0.00875427	0.0104896	0.00957004	0.00964092	0.0113332	0.0114789	0.0100787	0.00918173	0.00852905	0.132642	0.119949	0.00817365	0.0133337	0.00927113	0.0162851	0.0103688	0.0147176	0.0151087	0.0106918	0.010447	0.0101888	0.009961	0.00941868	0.0120924	0.0106968	0.00927644	0.0088815	0.0124756	0.00852137	0.0108183	0.00979913	0.0122198	0.00994724	0.01036	0.00887717	0.0115779	0.0145535	0.00827787	0.014216	0.00998836	0.00997354	0.0105873	0.00957237
0.0182689	0.00691874	0.0120504	0.00809216	0.00947501	0.0062405	0.0113772	0.0132764	0.0104597	0.0178197	0.0106657	0.0137798	0.0143292	0.0137306	0.00978836	0.0107766	0.130828	0.140714	0.00901901	0.00965522	0.0136243	0.0151973	0.0143341	0.0255777	0.016739	0.0234235	0.0107501	0.0112577	0.0126227	0.0110174	0.0125375	0.0102631	0.010851	0.0109975	0.010761	0.0133283	0.0136771	0.0119983	0.0134653	0.0127001	0.0106708	0.0098313	0.0137402	0.0135848	0.00952808	0.0157272	0.01223	0.0133937	0.0103686	0.013093
0.020916	0.00544586	0.0134749	0.0064271	0.00962691	0.00611978	0.0151021	0.0121074	0.0111845	0.0213284	0.0108749	0.0134467	0.0107896	0.0144615	0.0112346	0.0127588	0.122925	0.135582	0.00830451	0.00968695	0.0123866	0.0206015	0.0181008	0.0199216	0.0184058	0.0102899	0.0100285	0.0101562	0.0123405	0.0102848	0.0102143	0.00938682	0.00920863	0.00916924	0.00965986	0.010381	0.00897169	0.0110363	0.0120672	0.0122513	0.0112489	0.0109618	0.0130598	0.0176074	0.00803584	0.015492	0.0108744	0.0127304	0.0118262	0.0128106
0.0269851	0.00930953	0.0199636	0.0154898	0.0180495	0.00901305	0.232668	0.211344	0.218509	0.199727	0.234111	0.219419	0.201377	0.228222	0.189051	0.184009	0.0121818	0.0152702	0.0155701	0.0133638	0.313769	0.161111	0.0156377	0.02482	0.0223982	0.104582	0.10092	0.0964195	0.0867265	0.0911045	0.093449	0.098796	0.107674	0.100631	0.0984319	0.0854213	0.092021	0.0987331	0.100017	0.0982487	0.017023	0.0141309	0.0196765	0.0208689	0.0115565	0.0250892	0.0983962	0.101131	0.0977135	0.318793
0.0151617	0.0049904	0.0100934	0.00542267	0.00787885	0.00580111	0.00905517	0.0092709	0.00875094	0.00773034	0.00868469	0.00734214	0.00769298	0.0084375	0.00827105	0.00716446	0.00559605	0.0057656	0.00592273	0.00800747	0.00734637	0.0106424	0.00818299	0.0124828	0.0133421	0.0119344	0.00864116	0.0099914	0.00720604	0.00745531	0.0072671	0.0084054	0.00841076	0.00784305	0.0085126	0.00650469	0.00783068	0.00733338	0.00821721	0.00796662	0.00761946	0.00742499	0.00866456	0.0108914	0.00822906	0.0167464	0.00896999	0.00814244	0.00961178	0.00902093
0.0181956	0.00458716	0.0106835	0.00493502	0.00738639	0.00516782	0.00845995	0.00873601	0.0090949	0.00803418	0.0109265	0.00766831	0.0088025	0.0100674	0.00912136	0.00789089	0.00756208	0.00707477	0.00646979	0.0101988	0.00769168	0.00918499	0.0081192	0.0133441	0.013242	0.00917373	0.00927812	0.0076983	0.0076516	0.00821123	0.00844441	0.00713917	0.00768287	0.00791843	0.00901027	0.00978642	0.00897794	0.0102308	0.0085638	0.00777948	0.00877236	0.0102582	0.00939582	0.0121988	0.0069079	0.0117357	0.00850734	0.00794667	0.00721255	0.00763434
0.0288259	0.0106471	0.0217451	0.0107386	0.0150342	0.0239897	0.0177358	0.0147731	0.0168879	0.0133199	0.0234825	0.0166121	0.0159243	0.0182743	0.0217677	0.016789	0.0123066	0.00914588	0.0141067	0.191109	0.0137085	0.018101	0.015539	0.0217955	0.0264962	0.0190682	0.0170353	0.0163279	0.0168864	0.0168353	0.0163869	0.0184464	0.0181453	0.0180677	0.0196265	0.0167373	0.0161731	0.0174973	0.0164608	0.0168325	0.212697	0.219478	0.0184243	0.0239275	0.0169004	0.0221607	0.0175167	0.0152646	0.0146102	0.0136785
0.0299877	0.0128395	0.0257876	0.0128099	0.0138963	0.0246423	0.01889	0.0138217	0.0167877	0.0158891	0.0239657	0.0162187	0.0161285	0.0178681	0.0154138	0.0166894	0.0130359	0.00929826	0.0108565	0.183949	0.0148948	0.0147948	0.0134749	0.0228066	0.0263391	0.0173755	0.0159757	0.0235809	0.019391	0.0145251	0.0210808	0.0180262	0.0177267	0.0176509	0.0182307	0.0178265	0.0160771	0.0177041	0.0166719	0.0170369	0.208632	0.21059	0.0198101	0.015857	0.0208925	0.0220293	0.0199456	0.0170708	0.0148261	0.0142154
0.0270323	0.0132769	0.0171316	0.00984154	0.0132949	0.0230117	0.0165445	0.0172557	0.0152008	0.0173343	0.0129125	0.0176712	0.0156955	0.0189442	0.0180363	0.026297	0.0116484	0.0106678	0.0135539	0.17488	0.0149007	0.0180635	0.018786	0.025757	0.0252542	0.0160191	0.0147285	0.0152463	0.0149422	0.0151378	0.0138401	0.0157593	0.0146225	0.013418	0.015628	0.0153392	0.0139669	0.0151766	0.0133779	0.0129021	0.191484	0.189954	0.0158514	0.0193703	0.0156872	0.0207327	0.0169291	0.0151553	0.0131107	0.0148151
0.0214633	0.0116298	0.0184865	0.00898267	0.0123248	0.0213126	0.0158954	0.0145382	0.0143526	0.0122177	0.012463	0.0148883	0.0168997	0.012184	0.0129015	0.0190185	0.0122205	0.00971287	0.0118132	0.16862	0.0140693	0.0149672	0.0174517	0.0218382	0.0220108	0.0134752	0.0136286	0.0130627	0.0153681	0.0134686	0.013624	0.0156917	0.0140773	0.0159041	0.0153128	0.0165523	0.0142642	0.015952	0.013169	0.0127118	0.185679	0.191242	0.0217997	0.0169092	0.0170618	0.0219729	0.0165357	0.0151352	0.0152765	0.0129124
0.0267062	0.0106619	0.0145225	0.00839765	0.0158782	0.0195388	0.0168229	0.0192331	0.0144167	0.0179238	0.0144136	0.0175953	0.0164916	0.0124651	0.015047	0.0172953	0.0151815	0.0125132	0.0118842	0.168931	0.0174984	0.0227906	0.0254642	0.0274197	0.0276791	0.0151928	0.0136584	0.0117276	0.0149494	0.017435	0.0128004	0.016884	0.0163408	0.0162709	0.0136722	0.0166696	0.0123905	0.0146604	0.0145726	0.0121923	0.176374	0.177277	0.015978	0.0162401	0.0145781	0.0212536	0.0180449	0.0135136	0.0132037	0.0151367
0.0268971	0.0111717	0.0200443	0.00940374	0.0173859	0.0239869	0.0184559	0.0138361	0.0146926	0.013997	0.0161517	0.0150194	0.0166477	0.0134509	0.0173764	0.0151638	0.0132984	0.0121128	0.0113026	0.165193	0.0146185	0.0161392	0.015792	0.0263006	0.0278432	0.0160908	0.0156597	0.0167753	0.0133504	0.0154759	0.0147336	0.0158299	0.0149433	0.0148794	0.0181345	0.0174168	0.014856	0.0161183	0.0145382	0.0137412	0.180746	0.187798	0.0158048	0.0213341	0.0175939	0.0176419	0.018255	0.0206583	0.0133756	0.014552
0.0288223	0.0130434	0.0179643	0.0133747	0.0178203	0.025049	0.0178317	0.0154195	0.0175966	0.0171806	0.0169873	0.0151835	0.0175317	0.0177871	0.0198412	0.0190615	0.0123916	0.0119159	0.0125775	0.196226	0.0189284	0.0205886	0.0172608	0.0240731	0.0238689	0.0152905	0.0151355	0.0138763	0.014902	0.0146326	0.0174328	0.0204835	0.0201763	0.02009	0.0204206	0.014992	0.0168745	0.015033	0.0158968	0.0166046	0.223185	0.204052	0.0196304	0.0171459	0.0199623	0.0207951	0.0163014	0.0172539	0.0165141	0.0168665
0.0256796	0.0126866	0.0164873	0.0110751	0.0163214	0.0251341	0.0199092	0.0156486	0.0186611	0.0136064	0.0162993	0.0154427	0.0188875	0.0141242	0.018159	0.0146916	0.0126824	0.0100041	0.013409	0.185443	0.0203537	0.0244958	0.017536	0.0214081	0.0218612	0.0174806	0.0164167	0.015735	0.0148704	0.016224	0.0148332	0.0239532	0.0224321	0.0223361	0.0167494	0.0146784	0.0158856	0.0159587	0.0149479	0.0156315	0.194455	0.214977	0.0158808	0.0156681	0.0202179	0.0208598	0.015954	0.0184292	0.0203298	0.0143513
0.0208289	0.0111109	0.0161899	0.00840925	0.0115932	0.0210888	0.0160808	0.0136102	0.0109698	0.0203902	0.0116265	0.0128139	0.0125232	0.0129406	0.0103948	0.0122605	0.00963207	0.0130744	0.0103456	0.245025	0.0130462	0.0173754	0.0140308	0.0182559	0.0257018	0.0125237	0.0153456	0.0165761	0.0174304	0.0161283	0.0163144	0.0151638	0.019441	0.0181775	0.0146296	0.01812	0.0127278	0.012076	0.0169463	0.0171628	0.257329	0.295177	0.0182366	0.0139019	0.0149421	0.0150446	0.0137573	0.0173519	0.0149933	0.0143709
0.0284258	0.0107653	0.0279412	0.0131086	0.0172847	0.024198	0.0149557	0.0173077	0.0154031	0.0177144	0.0162938	0.0182962	0.0194002	0.0170337	0.0132188	0.0147088	0.0114712	0.0104165	0.0149104	0.207543	0.0175122	0.0182194	0.0162496	0.026532	0.026556	0.0140884	0.0167268	0.0195949	0.0176765	0.0140815	0.0179598	0.0195848	0.0132658	0.0162112	0.0145732	0.0135376	0.0215808	0.0165612	0.0143668	0.0150419	0.237883	0.222398	0.0250028	0.0226748	0.0164959	0.0186869	0.0138117	0.0144042	0.0137866	0.0149796
0.0266294	0.00878238	0.0252571	0.00805753	0.0149012	0.0199062	0.0136992	0.0196892	0.0138429	0.0197536	0.0157541	0.0167591	0.0161789	0.0158671	0.0139508	0.014551	0.0130007	0.0115598	0.0126535	0.183226	0.0239208	0.0280513	0.0198459	0.0253157	0.0257284	0.0145881	0.0139029	0.0236597	0.0192756	0.0151417	0.01872	0.0184914	0.0138084	0.0137493	0.0133489	0.0126641	0.0205914	0.0157215	0.0153532	0.0164798	0.199924	0.203983	0.0225704	0.0242902	0.0160663	0.0187472	0.0163062	0.0151591	0.0131657	0.0208561
0.0229515	0.00774142	0.021076	0.00738102	0.0135455	0.0184179	0.0133077	0.0193841	0.0124368	0.027984	0.0133995	0.0173118	0.0154303	0.0160844	0.0129934	0.0142514	0.0131866	0.012454	0.0120389	0.162407	0.0178607	0.0181536	0.0257259	0.0258854	0.0185554	0.0138481	0.012255	0.0146227	0.0167643	0.0128526	0.014501	0.0119206	0.0114414	0.0113924	0.012017	0.0146515	0.0147626	0.0133718	0.0125667	0.0123832	0.178177	0.170304	0.0204803	0.0142741	0.013319	0.0165251	0.0161082	0.015342	0.0130263	0.0159651
0.027012	0.0100909	0.0267339	0.00783884	0.0145557	0.0204537	0.0169231	0.0129407	0.0137365	0.0126012	0.0139875	0.015591	0.0139491	0.0139083	0.0148884	0.0155087	0.0107802	0.0131096	0.0175389	0.184347	0.0209444	0.0197317	0.0159285	0.0301454	0.0273875	0.0139192	0.0140776	0.0183505	0.0244831	0.0139123	0.0163245	0.0153367	0.0147984	0.0163724	0.0152192	0.0149231	0.016619	0.0142322	0.0160514	0.015817	0.199485	0.21632	0.0289843	0.0202609	0.0159429	0.0177943	0.015344	0.0139284	0.0133312	0.0163388
0.0273524	0.00848541	0.0158968	0.00901171	0.0125937	0.0190212	0.0178715	0.0118191	0.0138754	0.012951	0.0152214	0.0185418	0.0148677	0.0153443	0.0139787	0.01378	0.0112092	0.0113683	0.012839	0.181946	0.012731	0.0167616	0.0172211	0.0194192	0.0266824	0.0143465	0.0161839	0.0131049	0.0156706	0.0165455	0.0186889	0.0157424	0.0141229	0.0140625	0.0223452	0.0171248	0.0148503	0.0149186	0.01429	0.0159412	0.226255	0.224455	0.016321	0.0200797	0.0220075	0.0200399	0.0179716	0.0187731	0.0150616	0.0148433
0.0289792	0.00877713	0.0161549	0.00963168	0.0121	0.017919	0.0173233	0.0140553	0.0133025	0.0119861	0.0151922	0.0146555	0.015109	0.0140076	0.0126272	0.0123879	0.00925527	0.0130199	0.0134488	0.180825	0.0123751	0.0156142	0.0148755	0.0217585	0.0215054	0.0148597	0.0147453	0.014133	0.0156681	0.0170943	0.0195592	0.0146188	0.0165601	0.0175886	0.020721	0.0168754	0.0214023	0.0162634	0.014522	0.0145799	0.201739	0.208709	0.016586	0.0140728	0.0246586	0.0203652	0.0188252	0.019639	0.0185284	0.0131644
0.0284735	0.0104396	0.0224867	0.0108599	0.0121175	0.0195472	0.0153739	0.0183297	0.0135932	0.0191664	0.0143843	0.0169711	0.0143245	0.0140228	0.0131823	0.0145531	0.00996818	0.00954948	0.0124253	0.17817	0.0118828	0.0177825	0.0146159	0.0193901	0.0234269	0.0146004	0.0192244	0.0141534	0.0199374	0.0187234	0.0194965	0.0176159	0.0187118	0.0183618	0.0200805	0.0145083	0.0207592	0.0159796	0.0153455	0.0143255	0.203378	0.200569	0.0176003	0.0179755	0.0277968	0.0204101	0.0184968	0.0198476	0.0158305	0.0132042
0.142888	0.0180898	0.0313322	0.0188993	0.0226942	0.0181392	0.0278697	0.0215249	0.0247681	0.0208376	0.0263273	0.0243636	0.0252644	0.0281196	0.0279889	0.02328	0.0216984	0.0260141	0.0200217	0.0254034	0.0236897	0.0267439	0.0245677	0.114404	0.131605	0.02548	0.0251414	0.0228925	0.0250506	0.0229828	0.0201063	0.0275124	0.0342594	0.0347221	0.025796	0.0309763	0.0364919	0.0336048	0.0242935	0.0251357	0.0275651	0.0274585	0.0316169	0.0452303	0.0186428	0.0306957	0.0236662	0.0261186	0.0244036	0.0231006
0.0226436	0.00971053	0.023498	0.0117353	0.014674	0.0271696	0.0157321	0.0138133	0.0158787	0.0150855	0.0161748	0.0162088	0.0149248	0.0148811	0.0213292	0.0157695	0.0114245	0.0113576	0.0126583	0.278194	0.0133022	0.0159847	0.0170798	0.0296306	0.020532	0.0142077	0.0143694	0.0140788	0.0141729	0.0239834	0.0159606	0.0155304	0.0198916	0.0170212	0.0172607	0.0237542	0.0182303	0.017383	0.015119	0.0155063	0.272303	0.278393	0.0186774	0.0194131	0.0208798	0.0201813	0.0170858	0.0161127	0.0151195	0.0145156
0.0307027	0.0120761	0.0211898	0.01029	0.0179916	0.0154289	0.0129622	0.0149604	0.0158689	0.0147969	0.0210522	0.025149	0.0152249	0.0192673	0.0171438	0.0139806	0.0104196	0.0109378	0.0128596	0.260495	0.0152224	0.0168548	0.0170752	0.0312995	0.023754	0.0232266	0.0216116	0.0198136	0.0184412	0.017953	0.0181602	0.012796	0.0158528	0.0154814	0.0184982	0.0142712	0.0197001	0.0164415	0.0151325	0.0164027	0.528083	0.289726	0.0271139	0.0170987	0.0217473	0.0233944	0.0170694	0.0210727	0.0139404	0.0160556
0.0172498	0.00798453	0.012816	0.00818736	0.0122543	0.0094881	0.0131298	0.0107665	0.0133643	0.011044	0.0127563	0.0101776	0.0135298	0.0126337	0.0153458	0.0133094	0.0100943	0.00906296	0.0104083	0.019809	0.0111657	0.0152382	0.0127611	0.0155788	0.0162873	0.0143109	0.0126358	0.015194	0.0214346	0.0145309	0.0160765	0.013185	0.0140878	0.0122463	0.0144884	0.0140997	0.0184516	0.0147399	0.0144296	0.0153127	0.0208229	0.020946	0.0145129	0.0139672	0.746477	0.0141899	0.013431	0.0131838	0.0110956	0.0173319
0.0220339	0.00719927	0.0130307	0.00622869	0.0100292	0.00731811	0.0142879	0.0115745	0.0128274	0.0178555	0.0129143	0.0120444	0.0129738	0.0179556	0.0115305	0.011607	0.00988167	0.010583	0.0114376	0.0161864	0.0110949	0.0155542	0.0181114	0.0173735	0.0160516	0.0124938	0.0118074	0.0160822	0.0133222	0.00982636	0.0101468	0.0122913	0.0118958	0.0104396	0.0134782	0.0115573	0.0106236	0.0120821	0.0134108	0.0104537	0.0242259	0.0214435	0.0159936	0.0138786	0.215883	0.01696	0.01601	0.0143466	0.0100044	0.0122214
0.0255486	0.0142823	0.0179601	0.0144445	0.014487	0.0111148	0.0170404	0.0194818	0.0175778	0.0191111	0.0242162	0.0162932	0.0165027	0.0184692	0.0153752	0.0177926	0.0131163	0.0163097	0.012497	0.0190919	0.0221558	0.0238969	0.0214945	0.0225023	0.0344522	0.0160305	0.0205363	0.0155397	0.0189283	0.018871	0.0212497	0.0140183	0.0150792	0.0157131	0.0165899	0.015746	0.0167342	0.0213642	0.0163624	0.0181818	0.0214188	0.0188191	0.0181233	0.0192216	0.0131151	0.0279455	0.0153509	0.016041	0.0197886	0.0219533
0.0271983	0.00969058	0.0166999	0.0114655	0.0163335	0.011953	0.0206271	0.0173195	0.0154552	0.0167814	0.0200576	0.0247045	0.015719	0.02239	0.0213309	0.0179254	0.0148629	0.0148694	0.0138469	0.0188017	0.0163383	0.0171789	0.0180028	0.0238832	0.0254608	0.0176444	0.0161293	0.0154595	0.0195837	0.0217055	0.0195545	0.0166907	0.0207096	0.0202885	0.0161456	0.0188276	0.0252376	0.0183481	0.0155854	0.0176451	0.0234117	0.0202069	0.018467	0.0208635	0.0159623	0.021689	0.0207427	0.0196933	0.017549	0.0182554
0.0311836	0.0112287	0.0185011	0.00938829	0.0130524	0.00981386	0.0213151	0.0189217	0.0155205	0.013183	0.0161139	0.012331	0.0163554	0.0145285	0.014461	0.0135953	0.0141769	0.0129607	0.0121602	0.0177145	0.0167229	0.0183131	0.0147249	0.0215716	0.027273	0.0160415	0.0152696	0.0149405	0.0207471	0.0150904	0.0200347	0.0173285	0.0164107	0.0200402	0.0168773	0.018636	0.0172382	0.0154621	0.0162916	0.015145	0.0179818	0.0160123	0.0178628	0.024471	0.0147967	0.0205622	0.0173367	0.0163668	0.015665	0.016307
0.0301051	0.0109373	0.0143432	0.0104675	0.0187315	0.0100217	0.0214998	0.0196641	0.0179523	0.016415	0.0170037	0.0176591	0.0172586	0.0212754	0.0168167	0.0146649	0.0111672	0.012591	0.0180595	0.0132658	0.0149827	0.017644	0.0210627	0.0245598	0.0365272	0.0165954	0.0164485	0.0148003	0.0173318	0.0199046	0.018792	0.0176324	0.0231981	0.0214722	0.013441	0.0177922	0.0139674	0.0159896	0.0207593	0.0198169	0.0199562	0.0159401	0.0168858	0.0170761	0.0144824	0.0183225	0.0219529	0.0189312	0.0171659	0.0139608
0.0266415	0.00937379	0.0184392	0.00999638	0.0181313	0.013399	0.0217714	0.01649	0.0181392	0.0148791	0.0154698	0.0162499	0.0151679	0.0131928	0.0172952	0.0163937	0.0108349	0.0131725	0.01393	0.0145735	0.0174636	0.017282	0.0142046	0.0240266	0.0398433	0.0249187	0.0165713	0.0185304	0.0159486	0.0174004	0.0169109	0.0214923	0.0221781	0.0224178	0.0186616	0.0205457	0.0170374	0.0181226	0.0200156	0.0184085	0.0259075	0.0193445	0.0218088	0.020132	0.0160581	0.0257863	0.0147096	0.0160541	0.0205967	0.0156937
0.0261258	0.0124709	0.0189975	0.0131752	0.0188453	0.0112538	0.019543	0.0156793	0.0169763	0.0178804	0.020337	0.0144511	0.0172391	0.0171886	0.0203368	0.0188361	0.0137595	0.0126013	0.0137935	0.0190637	0.0189818	0.0182891	0.020759	0.0204904	0.0367153	0.0216747	0.0191377	0.0200105	0.0201717	0.0206324	0.024001	0.0213232	0.025401	0.0229317	0.0170672	0.0213548	0.0252525	0.0192802	0.0218545	0.0192162	0.0213641	0.0198275	0.0179102	0.0211541	0.0157156	0.0229908	0.0186182	0.0196233	0.0168049	0.0188463
0.0270567	0.0161838	0.0203911	0.0107379	0.0138104	0.0118632	0.0169285	0.017379	0.017764	0.0130768	0.0160524	0.0158559	0.0196651	0.0183003	0.0156131	0.019646	0.0114438	0.0113371	0.0141471	0.0192093	0.0198223	0.0267658	0.0238028	0.0237753	0.0369959	0.0156002	0.0154271	0.0164668	0.0244546	0.015939	0.0182259	0.0187578	0.0167221	0.0197089	0.024568	0.0238001	0.0145887	0.0194275	0.0189724	0.0173599	0.0181103	0.0209779	0.0176369	0.0160956	0.02009	0.0226629	0.0159811	0.0163043	0.0172654	0.021364
0.0268554	0.014373	0.0203771	0.0107549	0.014969	0.0108562	0.0176217	0.0154724	0.0147657	0.0174904	0.016724	0.0138644	0.0173862	0.0140015	0.0155956	0.0149462	0.0132458	0.0157289	0.0151915	0.0170261	0.0258976	0.0205904	0.0191313	0.0261687	0.0265364	0.0144997	0.0160954	0.0147414	0.0184672	0.0173203	0.0171626	0.0201791	0.0222808	0.0173325	0.0186179	0.0186252	0.0176512	0.0142555	0.0210824	0.0200934	0.025098	0.0200415	0.0188288	0.0204136	0.0168778	0.0262016	0.0159484	0.0159248	0.0186291	0.0204104
0.0332275	0.0122729	0.0211078	0.0129973	0.0152017	0.0140108	0.0219043	0.0166951	0.0170333	0.0190387	0.0220155	0.0160712	0.0187023	0.0189928	0.0209669	0.0179452	0.0139533	0.01198	0.0149494	0.0179694	0.0220489	0.0227197	0.0160063	0.0251236	0.0305422	0.0168513	0.0203775	0.0166904	0.0208074	0.0216029	0.0200003	0.0191008	0.0155067	0.0154404	0.0174311	0.017915	0.0154161	0.0172878	0.0157522	0.0141111	0.0209428	0.0197045	0.0177703	0.0239037	0.0149854	0.0218194	0.0165203	0.0194284	0.0143851	0.0211423
0.0317133	0.0106163	0.0214849	0.0106844	0.0151515	0.014051	0.0189068	0.0189238	0.0180029	0.0159032	0.0197492	0.0177088	0.0169213	0.0168717	0.0171292	0.0254432	0.0134073	0.0159206	0.0192209	0.0165833	0.0175952	0.0299029	0.0212265	0.0232576	0.0435728	0.0207618	0.0177397	0.0173501	0.0160688	0.0228983	0.0177338	0.020073	0.0200858	0.0221051	0.0173953	0.017169	0.0143632	0.0165409	0.0188906	0.0172359	0.0236398	0.0209735	0.0232935	0.0161706	0.0175716	0.024441	0.0175778	0.0161189	0.0167992	0.0213595
0.0248605	0.0114662	0.0153602	0.0121368	0.013694	0.0105064	0.0177855	0.0171877	0.0166157	0.0166537	0.0192414	0.0185445	0.0155994	0.0168234	0.0208526	0.0158484	0.0102607	0.0112323	0.0118129	0.0159057	0.0168895	0.0191792	0.0182161	0.029171	0.0320049	0.0154897	0.0166877	0.0143626	0.0200517	0.0171649	0.0197461	0.0178888	0.0179002	0.0171635	0.0160227	0.0177342	0.0174659	0.0192016	0.0190866	0.0191322	0.0192507	0.0232875	0.0203185	0.0190145	0.0163	0.0220132	0.0253092	0.0192064	0.0180605	0.0184459
0.0304107	0.0105573	0.0221872	0.0112418	0.0168739	0.0176728	0.0302082	0.0148253	0.017539	0.0164231	0.0182096	0.0182877	0.0167754	0.0163778	0.0159549	0.0170432	0.0110295	0.012089	0.0177319	0.0251844	0.0181704	0.0257336	0.0219204	0.0240178	0.0363675	0.0173742	0.0186935	0.0240091	0.0176101	0.0240163	0.0205559	0.0207292	0.0178312	0.0188419	0.0209579	0.0191209	0.0180887	0.0225332	0.0169793	0.0202912	0.0313355	0.0234344	0.0196813	0.0222656	0.0244467	0.0241659	0.0185228	0.0210847	0.015224	0.0206113
0.0317404	0.0114892	0.0207061	0.0109543	0.0149251	0.0108968	0.018653	0.0163913	0.0188059	0.0153821	0.016994	0.0174711	0.0183897	0.0176439	0.0168733	0.0207983	0.0179397	0.0120021	0.0128749	0.0183358	0.0213532	0.0236905	0.0206174	0.0225204	0.0305984	0.0190843	0.0211574	0.0195673	0.0181559	0.0205422	0.0218924	0.0187749	0.017703	0.0151091	0.0200641	0.017948	0.0150853	0.0191237	0.0208025	0.0233262	0.0209813	0.0193883	0.0269215	0.0248687	0.0180156	0.0277243	0.0172863	0.0157916	0.0196841	0.0172321
0.0289352	0.0120541	0.018113	0.0102359	0.0153692	0.0138062	0.016746	0.0156288	0.0175725	0.0132233	0.0165551	0.0150448	0.0184804	0.0213357	0.0167319	0.0191048	0.012409	0.0134579	0.0147312	0.0211828	0.0154805	0.0173621	0.014984	0.0216622	0.0251605	0.015432	0.0194228	0.0166217	0.0141376	0.0164527	0.0162958	0.0212545	0.0195802	0.0157988	0.0142347	0.0161257	0.0181232	0.0165208	0.0187678	0.0297222	0.0209573	0.0217399	0.0190697	0.018504	0.0158987	0.0214222	0.0199329	0.0161285	0.0197068	0.0194565
0.0307357	0.0113721	0.0202528	0.0127407	0.0232314	0.0138935	0.0187243	0.0157275	0.0178291	0.0151069	0.023044	0.0139587	0.0192135	0.0184343	0.0187085	0.0176787	0.0133881	0.0135429	0.0148243	0.039011	0.0196172	0.0218398	0.0219399	0.0297576	0.0242965	0.0210895	0.0201661	0.0178419	0.0168615	0.0187796	0.02171	0.023011	0.018496	0.0172893	0.0221275	0.0227187	0.0232663	0.0207344	0.0172376	0.0247404	0.03137	0.030201	0.0254055	0.0255016	0.0290182	0.025624	0.0188292	0.0191849	0.0157917	0.0198795
0.0285767	0.0108745	0.026687	0.0152589	0.029118	0.0120619	0.0169626	0.0158309	0.0161516	0.0154326	0.0181381	0.0168606	0.023974	0.0166999	0.0179261	0.0183509	0.0149952	0.0109055	0.0126834	0.0337629	0.0156807	0.021104	0.0267418	0.0300925	0.0289613	0.0201474	0.0210794	0.0191939	0.0210033	0.0180543	0.0193162	0.0181121	0.0170978	0.0180461	0.0182873	0.0225414	0.0166578	0.0198082	0.0186711	0.0183985	0.0328697	0.0353673	0.0221933	0.0213587	0.0326824	0.0211946	0.0191463	0.0212035	0.0173002	0.01665
0.0228528	0.00740962	0.0144773	0.00713737	0.010688	0.0114184	0.0118152	0.00950218	0.0108624	0.0123371	0.0118819	0.0104942	0.0104359	0.00944186	0.0128503	0.00942441	0.00752642	0.00842294	0.0102443	0.0278526	0.0125084	0.0147474	0.0157365	0.0217664	0.0177243	0.0114472	0.0101302	0.00911512	0.0101124	0.0106243	0.0107468	0.012267	0.0138847	0.0162297	0.0103474	0.011919	0.0112028	0.0118573	0.011187	0.0137795	0.0338494	0.0365196	0.0130599	0.0133383	0.0176993	0.0151448	0.0118814	0.0116592	0.0113551	0.0111975
0.0461333	0.0134083	0.0232007	0.0148947	0.0232167	0.0153574	0.0299053	0.0254975	0.0231665	0.0234491	0.0250545	0.0413036	0.0216386	0.0273287	0.0238611	0.0239382	0.0232474	0.0166332	0.0171145	0.0198666	0.0265312	0.042488	0.0275145	0.0403895	0.0466454	0.030517	0.0246914	0.0266244	0.0177062	0.0315187	0.022112	0.0235174	0.022531	0.020939	0.0262612	0.0224816	0.0243903	0.0225023	0.0293264	0.0215512	0.0250665	0.0244267	0.0240706	0.202957	0.0312088	0.141126	0.0229369	0.0218849	0.0248437	0.0208961
0.0310384	0.0110501	0.0151399	0.0128528	0.013209	0.0107295	0.0179558	0.01697	0.0196619	0.0239135	0.0162717	0.0131742	0.0190217	0.0155691	0.0169055	0.0190369	0.0152507	0.0151235	0.0131145	0.0316425	0.0135557	0.0197644	0.0265542	0.0249304	0.0200292	0.0171168	0.0151856	0.0215414	0.0192574	0.0153075	0.0200382	0.0165438	0.0156675	0.0147175	0.0133768	0.0189217	0.0167515	0.0156476	0.0152604	0.0170619	0.036703	0.0325934	0.0170539	0.018841	0.0157645	0.0187586	0.0168526	0.0216355	0.0152433	0.0164498
0.0262541	0.0118812	0.0188537	0.0140188	0.0167244	0.0101409	0.0177194	0.0180972	0.0191219	0.0183822	0.0145978	0.013554	0.0168101	0.0198337	0.0158488	0.0139474	0.00997056	0.0100788	0.0127297	0.0355329	0.0136745	0.0157534	0.0147979	0.0240674	0.0237186	0.0183732	0.0197811	0.0218324	0.016289	0.0186603	0.0161791	0.0172007	0.0166282	0.0165571	0.0159009	0.0147709	0.017981	0.0154416	0.0179556	0.0176934	0.0362198	0.036434	0.0231405	0.0171056	0.0159611	0.0185117	0.0145519	0.0151234	0.0156103	0.0153636
0.025805	0.009149	0.0178095	0.0143653	0.0133934	0.00930002	0.0181574	0.0154208	0.0153134	0.0202911	0.0123088	0.0138485	0.0150109	0.0139855	0.0124552	0.0147505	0.0135493	0.0143003	0.0145352	0.0326283	0.0174939	0.0194372	0.0240995	0.0197299	0.0195307	0.0161377	0.0147419	0.0191761	0.0214607	0.0213329	0.0186843	0.0151079	0.0140926	0.0130118	0.0129122	0.016156	0.0191048	0.015866	0.0162797	0.0175459	0.0312999	0.030751	0.0187852	0.0166574	0.014374	0.0196625	0.0156507	0.0148461	0.0159546	0.016295
0.0308799	0.0129016	0.0192078	0.0109286	0.0217566	0.00993699	0.0169639	0.0192392	0.016476	0.0154105	0.0214662	0.0181136	0.0164153	0.0176509	0.0182078	0.0196204	0.0166415	0.014919	0.0146244	0.0364921	0.0174174	0.0236999	0.0170004	0.0227341	0.0204367	0.0255337	0.0258242	0.0247519	0.0246394	0.0255211	0.0271924	0.0147369	0.0191031	0.0203562	0.0189569	0.0185703	0.0216569	0.0217565	0.0216262	0.0255725	0.0426175	0.0415297	0.0181259	0.0196515	0.0181046	0.0237398	0.0197884	0.0200997	0.0140209	0.0156522
0.028959	0.0104969	0.0145411	0.0101571	0.0136281	0.0127339	0.0179737	0.0166844	0.0143046	0.0176005	0.0148515	0.0138197	0.0190874	0.0152252	0.0138916	0.0165479	0.0111077	0.0132049	0.012527	0.0660218	0.0129617	0.0204429	0.0170827	0.0252631	0.0188523	0.0153438	0.0155184	0.0208759	0.0147966	0.0131838	0.0163297	0.0145654	0.0132497	0.0118737	0.0171693	0.0131644	0.0144895	0.0187906	0.0134167	0.0150354	0.0679252	0.0791196	0.0152875	0.0179028	0.0152328	0.0172066	0.015107	0.0158927	0.0128909	0.0142193
0.0232242	0.00722991	0.0201119	0.0086267	0.0115213	0.0149356	0.0121647	0.0119987	0.0127187	0.0208657	0.0160347	0.0122876	0.013577	0.0112811	0.0150464	0.0131041	0.0120034	0.0123671	0.0188493	0.0473967	0.0115247	0.015753	0.0206668	0.0181427	0.0163631	0.0126854	0.0140401	0.0146172	0.0140333	0.0138753	0.0200851	0.0131861	0.0139013	0.0152495	0.013085	0.0130555	0.0163967	0.0136483	0.0161396	0.0103721	0.0778526	0.0623018	0.0226544	0.014116	0.0151759	0.0184284	0.0139119	0.0129332	0.0130664	0.0117064
0.0220273	0.00782074	0.0165238	0.00842038	0.0102425	0.0111074	0.0122988	0.0121139	0.0117108	0.013727	0.0123923	0.0110765	0.0154821	0.0102912	0.010466	0.0107141	0.0123543	0.0114868	0.0154622	0.0433326	0.0128561	0.0150195	0.0140733	0.0188465	0.0178083	0.0175625	0.0160821	0.0156444	0.0136976	0.01447	0.0141571	0.0121411	0.0140179	0.0139579	0.0127345	0.0169631	0.0123101	0.0121334	0.0129884	0.0123417	0.0575468	0.0540264	0.0160053	0.0166774	0.0147244	0.0162045	0.011892	0.0116369	0.018639	0.0155544
0.0257975	0.0110828	0.0205532	0.0106756	0.0152252	0.019233	0.0188912	0.0142127	0.0145065	0.0143524	0.013555	0.0134134	0.018789	0.0144107	0.0126225	0.0149774	0.0120339	0.0117986	0.0133527	0.279122	0.0141086	0.0208972	0.0155857	0.0231759	0.02855	0.0158989	0.0166983	0.0195615	0.0145652	0.0177246	0.0160744	0.0177466	0.017457	0.0161835	0.0151674	0.013227	0.0149611	0.0129258	0.0146411	0.0176661	0.300764	0.311589	0.0191723	0.0168812	0.0204283	0.0195434	0.0165458	0.012238	0.0140559	0.014954
0.027193	0.0109743	0.0251468	0.0119791	0.0152463	0.025139	0.0163801	0.015569	0.0162086	0.0118869	0.0200035	0.0219605	0.0146254	0.013975	0.0205627	0.020431	0.0139124	0.0103289	0.0124598	0.289536	0.0168115	0.019988	0.0187757	0.0261745	0.0204212	0.0222378	0.0162977	0.0215569	0.0135816	0.0154621	0.0149888	0.0177554	0.0187185	0.0183225	0.0153353	0.0178827	0.015455	0.015843	0.016693	0.018001	0.277325	0.360638	0.0228786	0.0186032	0.0263673	0.0196642	0.0203476	0.0183824	0.0163596	0.0192308
0.0240376	0.0118218	0.0227988	0.0105177	0.0147119	0.0256468	0.0151419	0.0155801	0.0186232	0.0148591	0.017464	0.022751	0.017956	0.0173067	0.0151472	0.0142901	0.00924361	0.011387	0.0120111	0.316869	0.0139716	0.022837	0.0131722	0.0194239	0.0216407	0.0158272	0.0134461	0.0135015	0.0127596	0.0129719	0.0134416	0.0152591	0.0174501	0.0155138	0.0221124	0.0151825	0.0176579	0.0152494	0.0151581	0.0155464	0.280495	0.352083	0.0239689	0.0222437	0.0205022	0.018394	0.0174472	0.0190051	0.0139459	0.0139338
0.0273966	0.0100204	0.0152196	0.0107975	0.0133458	0.00964848	0.0157169	0.0177573	0.0190737	0.0145162	0.0176703	0.0147211	0.0181263	0.0142837	0.0159582	0.0157424	0.0149196	0.0119332	0.0117339	0.0140452	0.0179921	0.0183959	0.0157636	0.0189756	0.0278446	0.0148434	0.0150123	0.0161876	0.0144482	0.0154543	0.0168832	0.014907	0.0149165	0.0148527	0.0162798	0.0142504	0.0178556	0.0197619	0.0139016	0.01757	0.0134115	0.0154454	0.0193912	0.0228945	0.0118066	0.0238096	0.015805	0.0164004	0.0162896	0.0139147
0.0247993	0.00811259	0.0173696	0.0115443	0.0122593	0.00879879	0.0150209	0.0137383	0.0148748	0.01314	0.0145526	0.0126622	0.0162451	0.0133558	0.014708	0.0159253	0.00995118	0.010647	0.012086	0.0145131	0.0145152	0.0171698	0.0156804	0.0266588	0.0226198	0.0147712	0.0134149	0.0149034	0.0151892	0.0144626	0.0188964	0.0183871	0.0183988	0.0147743	0.0161752	0.0138917	0.0171111	0.0154116	0.0141409	0.0185792	0.0163424	0.0167939	0.0146231	0.0242096	0.0106873	0.0227723	0.015105	0.0168925	0.0173231	0.0165133
0.0454546	0.0103078	0.0262844	0.0105697	0.0149997	0.0129431	0.0138547	0.0139389	0.0155009	0.0180632	0.0167784	0.0201141	0.0157724	0.0173644	0.0159793	0.0150227	0.0108113	0.0125028	0.0139346	0.0151543	0.0219651	0.019356	0.258887	0.0288545	0.0214431	0.0187683	0.0151152	0.0151614	0.0152835	0.0145904	0.0168671	0.0157286	0.0174493	0.0166933	0.0228716	0.0179776	0.0248304	0.0242613	0.0159641	0.015731	0.0157587	0.016358	0.0168597	0.0226789	0.0109001	0.0217112	0.0195052	0.0222586	0.0206385	0.0163191
0.0237768	0.0112207	0.0215648	0.0134894	0.0149096	0.0116995	0.0200091	0.0186217	0.0170469	0.0138777	0.0156165	0.0177549	0.014986	0.013946	0.0188388	0.0179319	0.0122988	0.0140537	0.0123572	0.0156786	0.0134274	0.0240754	0.285098	0.0241577	0.0246691	0.0176124	0.016744	0.0215121	0.0174258	0.019012	0.0185191	0.0190595	0.0183781	0.0182995	0.016761	0.0188826	0.0168917	0.0176621	0.0206545	0.0156039	0.0204848	0.0138719	0.0166703	0.0212166	0.0163305	0.0260977	0.0155321	0.0165665	0.0151815	0.0151609
0.0306964	0.00857716	0.0255639	0.010594	0.0153179	0.0114315	0.0166246	0.0135875	0.0138089	0.0139836	0.0160853	0.0159025	0.0157715	0.0137178	0.0163183	0.0150005	0.0123926	0.0109109	0.0129596	0.0170879	0.0199388	0.0175204	0.306104	0.0217797	0.0224899	0.0170369	0.0179487	0.0182356	0.0152826	0.019157	0.0179426	0.0226967	0.0209641	0.022614	0.0154515	0.0180252	0.0166732	0.0188437	0.0180371	0.0167483	0.0167927	0.0163641	0.019737	0.0302861	0.0133093	0.0221718	0.024543	0.0191791	0.0193766	0.0166653
0.0286048	0.0104269	0.0207549	0.0105008	0.014631	0.0110895	0.0165548	0.0176134	0.0147982	0.0170509	0.0203741	0.0186704	0.0169874	0.0242879	0.0174951	0.0195379	0.0126978	0.0137477	0.0131067	0.0147819	0.0180244	0.0180221	0.237359	0.0458891	0.0254385	0.0203411	0.0181725	0.0167606	0.0127338	0.0193145	0.0167953	0.0190108	0.0133494	0.0132923	0.0161315	0.0219995	0.0162574	0.0159989	0.0125899	0.0143649	0.0157056	0.0172585	0.0200553	0.0174419	0.0129436	0.0280726	0.020045	0.0244254	0.018183	0.0159181
0.0254155	0.0087719	0.0181634	0.00883692	0.01093	0.0108578	0.0128451	0.0122592	0.017017	0.0124487	0.0129747	0.0151698	0.0135105	0.0113579	0.0131455	0.0164176	0.0101392	0.0135619	0.0120365	0.012472	0.0151786	0.0205701	0.195307	0.0192169	0.0163531	0.012329	0.0127527	0.0133097	0.0138618	0.0142834	0.0150148	0.0118535	0.0148952	0.0115356	0.0170208	0.0208181	0.015905	0.0137743	0.0161563	0.0167299	0.0143619	0.0158793	0.0165761	0.0179322	0.00955188	0.0166895	0.0131979	0.0148606	0.0118082	0.014527
0.0288477	0.0103999	0.0244144	0.0126389	0.0212453	0.0107646	0.0248116	0.0230127	0.0226271	0.0367429	0.0193465	0.019639	0.0351417	0.0138833	0.01678	0.0239141	0.0166957	0.0199538	0.0220927	0.0293051	0.0172365	0.024411	0.042682	0.029745	0.033329	0.0234945	0.0159595	0.0152968	0.0215237	0.0171741	0.0202085	0.0203537	0.0172599	0.018561	0.0166856	0.0191275	0.0188749	0.0179275	0.0191909	0.0175599	0.0293794	0.0316609	0.0186698	0.0202412	0.0291672	0.0244521	0.0165166	0.0192992	0.0181359	0.0216101
0.043726	0.0105859	0.0235738	0.01065	0.0205242	0.0120789	0.0159466	0.0178997	0.0179449	0.0216441	0.0189893	0.0220648	0.0168473	0.0161124	0.01672	0.0164176	0.0143137	0.0164124	0.0119768	0.0333653	0.0171463	0.0170311	0.0185384	0.0255976	0.0351716	0.0214566	0.021333	0.0200946	0.0196568	0.023627	0.0202227	0.0186043	0.0189742	0.0210318	0.0184091	0.0212051	0.0217105	0.0175198	0.0188365	0.0203126	0.0315445	0.0321367	0.0210834	0.0337698	0.0297532	0.0216609	0.0167648	0.0225625	0.0188087	0.0131624
0.0216045	0.00869338	0.0234716	0.0108369	0.0167431	0.0131199	0.0148464	0.0135788	0.0141366	0.014309	0.0143713	0.0144851	0.0152583	0.014921	0.0192198	0.0128188	0.0104425	0.0109618	0.0133322	0.0126868	0.0130764	0.0184631	0.0232474	0.0156841	0.0186309	0.015208	0.0210312	0.0162467	0.0164913	0.0183026	0.0153759	0.0146561	0.0143599	0.0139942	0.0182245	0.0137187	0.0215657	0.0146467	0.0215352	0.0185308	0.0143782	0.0137131	0.0179932	0.0218097	0.0122729	0.0211913	0.0139965	0.0139757	0.0163491	0.01518
0.0112432	0.00392268	0.00716606	0.00528306	0.00637009	0.00418441	0.00637413	0.00709303	0.00606939	0.00848909	0.00640647	0.00696531	0.00614782	0.00602933	0.00560123	0.00767945	0.00575222	0.00571733	0.00808995	0.00600374	0.0072717	0.0113338	0.00831751	0.0125056	0.010132	0.00746214	0.00592983	0.00609695	0.00664088	0.00777811	0.00754451	0.00692165	0.00629642	0.00595602	0.0062596	0.00591502	0.00761585	0.0076509	0.00666746	0.00677542	0.0061994	0.00593878	0.00882874	0.00722347	0.00595967	0.00774318	0.00726449	0.00821376	0.00633012	0.00865503
0.0297518	0.0127984	0.0206118	0.0107061	0.0274835	0.0128072	0.0149727	0.0148122	0.013675	0.0143933	0.0151041	0.0131654	0.0194223	0.0135847	0.0161109	0.0159037	0.010511	0.0122333	0.0122932	0.0331445	0.014764	0.0201807	0.0175441	0.0204751	0.0301653	0.0159442	0.0167459	0.0172395	0.0207866	0.0171623	0.0204603	0.0177973	0.0178086	0.0177324	0.0149003	0.0161483	0.0165042	0.0156757	0.0167805	0.0156496	0.0262937	0.0353415	0.0188642	0.0184684	0.0252947	0.0227172	0.0175148	0.0193298	0.0187947	0.0152966
0.0241182	0.00799222	0.0146609	0.0121465	0.0146654	0.00993859	0.0168327	0.0120795	0.013069	0.0119804	0.0138246	0.0152811	0.026533	0.016902	0.0168235	0.0119807	0.00824816	0.00849807	0.0109765	0.0184118	0.0161618	0.0174319	0.0183828	0.0215734	0.0190653	0.0145521	0.0152433	0.0141065	0.0149978	0.0145449	0.0165518	0.0166169	0.0176507	0.014264	0.0123648	0.0173514	0.0139872	0.021205	0.0132055	0.0130127	0.0128067	0.0127295	0.015065	0.0293471	0.00992127	0.0196302	0.0119791	0.0137816	0.0151817	0.0175392
0.0254181	0.00882409	0.0144649	0.00995306	0.0128899	0.0071421	0.0125423	0.0151325	0.0121968	0.0141413	0.0158289	0.0144971	0.0162025	0.0156502	0.0153262	0.0136319	0.0139393	0.0143616	0.0134199	0.0153243	0.0142368	0.0216914	0.0147645	0.0256139	0.0241115	0.0128534	0.0127288	0.0114215	0.0144737	0.0123117	0.0138075	0.0181771	0.0150255	0.0120739	0.0119284	0.0241761	0.01651	0.0168492	0.0133463	0.0154723	0.0190038	0.0136319	0.0129896	0.0171369	0.00894571	0.0182834	0.0187847	0.0152734	0.0161574	0.0167641
0.0330157	0.0101751	0.0180217	0.0100738	0.0169667	0.0109308	0.332652	0.310655	0.329176	0.26749	0.304627	0.332447	0.24703	0.285751	0.255352	0.246984	0.0119639	0.0125353	0.0134926	0.0133473	0.182644	0.0832854	0.0139568	0.0247892	0.0229031	0.0862449	0.0998257	0.0879394	0.0766694	0.0887565	0.0849363	0.104644	0.106597	0.0995664	0.0992799	0.0732991	0.0878429	0.0873049	0.0761684	0.0827464	0.0173167	0.0144202	0.0181404	0.0212438	0.0113244	0.0259861	0.0896311	0.0965301	0.0948388	0.184664
0.0179867	0.00690765	0.012283	0.0103245	0.0134461	0.00675851	0.0106221	0.010298	0.0109234	0.00875596	0.0132312	0.0113419	0.00927084	0.0126598	0.0100008	0.0131045	0.00866096	0.00864452	0.00915717	0.00948846	0.0102645	0.0110624	0.00997964	0.0169283	0.0202612	0.0119378	0.0120736	0.0126055	0.0117176	0.0132103	0.0168112	0.0121636	0.0111221	0.0104477	0.0129491	0.0134323	0.0131434	0.0123655	0.0137497	0.0139595	0.00987564	0.0104426	0.012863	0.0173874	0.00988296	0.0170326	0.0126043	0.0123723	0.0142918	0.0125116
0.044522	0.0139632	0.0287915	0.0113463	0.023091	0.0132771	0.0210341	0.0257966	0.0204837	0.0188989	0.0207942	0.0183581	0.0195012	0.0235138	0.0247548	0.0211947	0.0170532	0.0207073	0.0154545	0.0196085	0.0250226	0.0206432	0.0214586	0.0415559	0.0303952	0.0191879	0.0208617	0.0190654	0.0193362	0.0220552	0.0276445	0.0188767	0.0264443	0.0202186	0.0194258	0.0257146	0.0253507	0.0231093	0.0229709	0.0226355	0.0283694	0.0179695	0.0261072	0.0306989	0.0179876	0.0362372	0.0240363	0.0244806	0.0271065	0.0187695
0.026332	0.0117314	0.014652	0.00937355	0.0151952	0.0108889	0.0572257	0.0667518	0.0692309	0.0623193	0.0505605	0.0546356	0.0820892	0.0690354	0.0502346	0.0540898	0.0116228	0.0107049	0.0111219	0.0125994	0.0896053	0.0316002	0.0178926	0.0265348	0.029604	0.215822	0.215472	0.204642	0.197718	0.216547	0.22157	0.333767	0.335072	0.331191	0.262872	0.203232	0.220989	0.22446	0.239653	0.230544	0.0147653	0.0125233	0.0154258	0.0181011	0.0115369	0.0213587	0.250757	0.250107	0.206173	0.0854774
0.0215335	0.0112133	0.0192169	0.0107142	0.0127086	0.0147114	0.0122543	0.00993914	0.0121087	0.0143917	0.0121145	0.0101785	0.0111867	0.0109353	0.0130614	0.0113653	0.00868981	0.0110776	0.0136206	0.0478407	0.010706	0.0158574	0.0144819	0.0196802	0.0266939	0.0132246	0.0126711	0.0116952	0.0114776	0.0118267	0.0143089	0.0127819	0.0134752	0.0134176	0.0133886	0.0161465	0.0138506	0.0145986	0.0115636	0.012065	0.0651755	0.063512	0.02196	0.0189238	0.0194561	0.0168524	0.0134855	0.0123047	0.0131103	0.0129362
0.0285192	0.011043	0.0178942	0.011714	0.0250314	0.0115143	0.017274	0.0199068	0.0151323	0.0168546	0.0177601	0.0174739	0.014421	0.0166663	0.0149626	0.0146512	0.0125442	0.0122441	0.0119133	0.0261373	0.0222566	0.0333475	0.0158686	0.0325346	0.0265908	0.0159469	0.0150765	0.0154586	0.0133388	0.0162855	0.0161229	0.0214862	0.0167221	0.01767	0.0161447	0.0156494	0.0135709	0.0146558	0.0166008	0.0186953	0.0235776	0.0246407	0.0225588	0.0230558	0.0229262	0.0216556	0.0191078	0.0187326	0.0152732	0.0196685
0.0320131	0.0101875	0.0214567	0.00968652	0.0187535	0.0110319	0.0161327	0.0156774	0.0160014	0.0163969	0.0156164	0.0166845	0.0251891	0.01526	0.0174042	0.0197603	0.0117754	0.0152203	0.0176262	0.0257338	0.0226672	0.0277463	0.0164902	0.0353031	0.0286804	0.0155138	0.0156903	0.0150388	0.0194649	0.0155062	0.0156851	0.017253	0.0166	0.0185125	0.0167305	0.0196649	0.0132023	0.0175736	0.0191163	0.0214354	0.0272588	0.0252673	0.0295276	0.0203137	0.020924	0.0274367	0.0145332	0.0145116	0.0193806	0.0230932
0.0304008	0.00845509	0.0208392	0.0095922	0.016039	0.00807697	0.331321	0.303031	0.326359	0.265782	0.312698	0.334176	0.262293	0.30537	0.250783	0.232501	0.0158031	0.0152107	0.0128978	0.0163646	0.179075	0.0982557	0.0262383	0.0283755	0.0245779	0.0861457	0.0887823	0.0790628	0.0750186	0.0880675	0.079811	0.0953828	0.0989905	0.0979249	0.0928515	0.07886	0.0875126	0.0908136	0.0675422	0.0750727	0.0229228	0.0141577	0.0178267	0.0226062	0.0140689	0.0218887	0.084361	0.0845636	0.0859573	0.192565
0.0274387	0.00873177	0.0176968	0.00895358	0.0151142	0.0122194	0.0213173	0.0194972	0.016458	0.0169616	0.0145242	0.0143005	0.0133912	0.012807	0.0143748	0.0172144	0.0122948	0.0111548	0.0117963	0.0120787	0.0159486	0.0201229	0.018344	0.0224331	0.0178342	0.013297	0.0146178	0.0145712	0.0150946	0.0144462	0.0184122	0.0133658	0.0202038	0.0232341	0.012584	0.0179424	0.0141448	0.0125047	0.0189272	0.0178157	0.0156708	0.0136049	0.0225723	0.018862	0.0118247	0.0205768	0.0185399	0.0161984	0.0168881	0.0192279
0.0259334	0.00868144	0.0159629	0.00748896	0.0133271	0.012879	0.0162527	0.0194389	0.01619	0.0206114	0.0131011	0.0159255	0.0156559	0.0160831	0.015773	0.0178338	0.0114681	0.0154259	0.0138316	0.0264381	0.0143465	0.0215948	0.0208817	0.0217357	0.021337	0.0137997	0.0129417	0.0150798	0.0172393	0.0120375	0.0144594	0.0153038	0.0123497	0.011805	0.0121928	0.01345	0.0108042	0.012334	0.0125053	0.0118395	0.0262148	0.0240997	0.0136553	0.0182609	0.0987023	0.0156733	0.015338	0.0125535	0.0124959	0.0154623
0.0347893	0.016258	0.196455	0.0128605	0.0175486	0.014897	0.0265504	0.0296797	0.0216695	0.0223326	0.0216647	0.0201314	0.0199904	0.0207291	0.0178553	0.0207157	0.0177182	0.0174253	0.012716	0.0184387	0.021635	0.0342561	0.021997	0.027476	0.0267957	0.0181842	0.0179634	0.0233666	0.015884	0.0177526	0.0183849	0.0174733	0.0174845	0.0190677	0.0171253	0.0147152	0.0198654	0.0199568	0.0173576	0.0187331	0.0200078	0.0243714	0.204637	0.0244101	0.0170106	0.0264167	0.0190708	0.0173498	0.0198462	0.0264747
0.0323823	0.0109607	0.0230351	0.0138328	0.0197484	0.0113951	0.0168287	0.0269356	0.0160241	0.0257368	0.0162587	0.0222107	0.0199564	0.0162801	0.0190853	0.0224867	0.0165673	0.0190775	0.0164861	0.0345138	0.0211747	0.0310889	0.0219595	0.0367108	0.0377572	0.0195733	0.019796	0.018974	0.0221506	0.0195636	0.0205654	0.020011	0.0181348	0.0191858	0.0178733	0.0281531	0.0202823	0.0218849	0.0206287	0.0210666	0.0465297	0.0401812	0.0263364	0.0231164	0.0287825	0.0245318	0.0184614	0.01805	0.0150706	0.0262794
0.012268	0.00389799	0.00780974	0.00427458	0.00670852	0.00396854	0.00697475	0.00521119	0.00561236	0.008263	0.00650675	0.00671685	0.00671002	0.00585408	0.00591937	0.00766927	0.00513133	0.00606048	0.00494013	0.00662616	0.00721855	0.00798504	0.00881923	0.0129871	0.0110127	0.00640736	0.00618118	0.00668896	0.00541836	0.00630567	0.00578045	0.00766114	0.00630748	0.00628051	0.00618743	0.00648937	0.00511295	0.00542722	0.00712874	0.0072145	0.00709284	0.00785864	0.00711428	0.00791648	0.0055781	0.00744651	0.00701382	0.00720069	0.00623109	0.00617121
0.0107312	0.00432807	0.00658588	0.00438183	0.00711984	0.00421675	0.00755514	0.00636452	0.0061527	0.0057696	0.0065845	0.00614533	0.00631866	0.00667628	0.00655167	0.0069944	0.00468605	0.00456705	0.00507057	0.00897065	0.00610402	0.00757543	0.00757554	0.011162	0.0103127	0.00638416	0.00696125	0.0063821	0.00566587	0.00677983	0.00726147	0.007262	0.00687384	0.00635555	0.00696829	0.00637928	0.00605266	0.00745353	0.006629	0.00797314	0.00688263	0.00603626	0.00767137	0.00801107	0.00530471	0.0076804	0.0080973	0.00738655	0.00611447	0.00653769
0.0114675	0.0042022	0.00773441	0.00413886	0.00651722	0.00466104	0.00732399	0.00504692	0.00592298	0.0052322	0.00585189	0.00629611	0.00675779	0.00626349	0.00566763	0.00715576	0.00504892	0.00428004	0.00454083	0.00585281	0.00686738	0.00879227	0.00638876	0.01072	0.00990439	0.00614116	0.0060074	0.00546517	0.00534933	0.005635	0.00651431	0.00643775	0.00644185	0.0064143	0.0070327	0.00643825	0.0057145	0.00613672	0.00619835	0.00601089	0.00664855	0.00618876	0.0069085	0.00871678	0.00535375	0.010384	0.00564988	0.00584298	0.00626741	0.00610572
0.0200077	0.00755359	0.0108167	0.00578685	0.0089217	0.431425	0.0116581	0.0148413	0.0091506	0.0082159	0.00981196	0.00885359	0.0118071	0.0098353	0.0109762	0.00956611	0.00863059	0.00785812	0.00814889	0.0203913	0.00999065	0.0108048	0.013979	0.0125536	0.018452	0.00995937	0.00895351	0.00888822	0.010717	0.00884841	0.0100693	0.010731	0.0101154	0.00929733	0.00864247	0.0108531	0.00943738	0.0105688	0.00896055	0.00928642	0.017296	0.023232	0.0110352	0.010712	0.0105623	0.0146979	0.0101392	0.00933317	0.00817598	0.0105154
0.0347328	0.013299	0.0226724	0.0130913	0.0164792	0.0121857	0.0207529	0.0269265	0.0193012	0.017862	0.0205163	0.019438	0.0224351	0.0232824	0.0227199	0.0246539	0.0135272	0.0158376	0.0145623	0.0237555	0.017975	0.0208409	0.0251908	0.0314654	0.0298788	0.0222774	0.0235105	0.0197174	0.0190777	0.0246866	0.0264404	0.0204868	0.0200232	0.0204122	0.0201022	0.0168518	0.0165884	0.0190454	0.0160916	0.0153903	0.0229128	0.0176764	0.0292221	0.0261313	0.014858	0.0401019	0.0228105	0.0227766	0.0231916	0.0203704
0.0239756	0.00728289	0.00966449	0.00595654	0.00838512	0.436779	0.0100685	0.0138133	0.00913777	0.00860137	0.00964267	0.00884118	0.0122383	0.0096727	0.0105165	0.0095527	0.00841806	0.00753735	0.0089286	0.0209363	0.00981828	0.0111893	0.0141237	0.0128209	0.0184262	0.0105769	0.00894096	0.00902878	0.00925578	0.00915157	0.0108532	0.0121137	0.00885797	0.00928429	0.00942946	0.0108379	0.00911516	0.0100883	0.00925653	0.00881733	0.0178942	0.0235027	0.0145684	0.0110932	0.0103323	0.01376	0.013289	0.0112157	0.0084669	0.0105006
0.0216066	0.00764738	0.0122958	0.00603897	0.00943098	0.448783	0.0119624	0.0175055	0.0101755	0.0105986	0.0124567	0.00881414	0.0136182	0.0108626	0.0121637	0.00968489	0.00843295	0.00774634	0.00905216	0.0223891	0.0115597	0.0111415	0.0151516	0.0129983	0.0186812	0.0089627	0.0108452	0.00899858	0.00821088	0.00959815	0.0103562	0.0132261	0.0108712	0.00941278	0.00939792	0.0111384	0.0115908	0.0100706	0.00860258	0.00940173	0.0181418	0.0242891	0.0104147	0.0110459	0.0116756	0.0141829	0.00978389	0.0100897	0.0104235	0.0100197
0.0209879	0.00618126	0.011748	0.00679757	0.00907	0.455075	0.0113786	0.010407	0.0120728	0.00970768	0.0107667	0.00974411	0.010332	0.010148	0.01056	0.0108103	0.0075589	0.00714782	0.00712343	0.0217804	0.0119445	0.0121806	0.0134054	0.0132471	0.0214866	0.0097867	0.0108879	0.00917082	0.00851747	0.00978187	0.00923508	0.0112327	0.0110793	0.0111918	0.0115594	0.0124254	0.0100567	0.0107444	0.0102019	0.0100529	0.0188106	0.0308642	0.0123509	0.011462	0.011343	0.0132696	0.00997116	0.0122414	0.0089046	0.0118071
0.035928	0.0122128	0.0204459	0.0141218	0.016492	0.0119048	0.0249894	0.0206995	0.0215499	0.0190366	0.0219077	0.0207563	0.0201286	0.0205157	0.0275231	0.0222677	0.0228266	0.0133063	0.0138878	0.0210589	0.0185098	0.0263488	0.0221491	0.0401327	0.037868	0.0255488	0.0344526	0.0238492	0.017771	0.0208072	0.0200906	0.0232727	0.0251505	0.0264342	0.0210757	0.0222477	0.0236144	0.0307004	0.0208067	0.022781	0.0237836	0.0213588	0.0324668	0.029091	0.0125801	0.0439886	0.0218105	0.0222515	0.0226569	0.0185123
0.0204704	0.00704916	0.0140919	0.00775712	0.0109121	0.467336	0.00967112	0.0112707	0.00935728	0.0153511	0.00971505	0.00920446	0.00976676	0.00914796	0.0114553	0.0117268	0.00973772	0.00716626	0.00885283	0.021896	0.010206	0.0120849	0.0120498	0.016102	0.0193138	0.00923491	0.00886508	0.0086487	0.0113281	0.00876101	0.0113941	0.011241	0.00893688	0.00874523	0.00871558	0.0133956	0.0110292	0.0120033	0.00978984	0.00889323	0.0152738	0.0224011	0.0129633	0.010017	0.0110983	0.0131884	0.00862728	0.00877111	0.00854496	0.0107177
0.0191396	0.00639373	0.0119195	0.00703822	0.0109406	0.348236	0.0112603	0.0115472	0.0120216	0.00947151	0.0123126	0.0105469	0.0114918	0.0117809	0.0117262	0.00986637	0.0085858	0.00795014	0.00870233	0.0130631	0.00996076	0.0134346	0.00837081	0.0157579	0.0179845	0.0123264	0.0135055	0.0129447	0.010665	0.00992468	0.0110777	0.0117897	0.0109545	0.0122501	0.0121326	0.0114314	0.011058	0.0124554	0.0165635	0.0153325	0.0165372	0.0230215	0.0109379	0.0118155	0.0114386	0.0121866	0.011495	0.0126771	0.0122976	0.0107179
0.0250353	0.00608384	0.0134872	0.00659487	0.00801151	0.431231	0.0124586	0.0115391	0.00900983	0.00809169	0.00982203	0.00974895	0.0097247	0.0102929	0.00905726	0.0101839	0.00753441	0.00776269	0.00679771	0.0227122	0.00920718	0.00921354	0.0125117	0.0125665	0.0195265	0.0096531	0.010083	0.00859054	0.00840845	0.00917383	0.00815972	0.0119875	0.00887951	0.00961711	0.00961261	0.0117572	0.0116152	0.0101129	0.0094337	0.0103627	0.0163779	0.0220398	0.0110465	0.0109216	0.0105732	0.0137934	0.0107839	0.0121931	0.00909375	0.0102166
0.0191114	0.00680926	0.0103035	0.00698223	0.0110813	0.444506	0.0107715	0.00999666	0.00980402	0.010526	0.0101789	0.0087537	0.0105193	0.00973931	0.0119312	0.0102292	0.0077697	0.00717341	0.0087625	0.0225243	0.0103642	0.0102604	0.0152131	0.0129092	0.0188181	0.00969599	0.00900253	0.00986138	0.0100476	0.0101678	0.010928	0.0114153	0.0100143	0.00950404	0.00965532	0.0116599	0.0124447	0.0106266	0.00932028	0.0104087	0.0194275	0.0227485	0.0103433	0.00977339	0.0138712	0.0138547	0.00939821	0.0100205	0.00822074	0.010262
0.024125	0.00636861	0.0110595	0.00617256	0.00870103	0.476911	0.0134556	0.0104245	0.0119079	0.011318	0.0114242	0.00845145	0.010963	0.0124282	0.00998583	0.00854419	0.00736127	0.00664926	0.00830188	0.0209224	0.0109949	0.0118621	0.0125591	0.0157676	0.0214546	0.011437	0.0115671	0.0107789	0.00916792	0.010955	0.0101178	0.0121892	0.0104769	0.0113663	0.00868412	0.0121005	0.0129029	0.0110882	0.0105561	0.010096	0.0173794	0.0238017	0.0127798	0.0113616	0.0121294	0.0108458	0.00986965	0.0101729	0.00836752	0.0100999
0.0246104	0.00844661	0.0222811	0.00881051	0.0134242	0.00813985	0.0132125	0.0137762	0.0135873	0.0237831	0.0117557	0.0131179	0.0183004	0.0132477	0.0131861	0.0157909	0.0112781	0.0116198	0.0104412	0.0125251	0.0180877	0.0184589	0.0201373	0.0258422	0.0203388	0.0143188	0.0139453	0.0138804	0.0145752	0.0137816	0.0166215	0.013304	0.0127904	0.0137754	0.0147648	0.0149624	0.0155702	0.0159025	0.0155481	0.0142997	0.0133295	0.0140081	0.0169411	0.0183004	0.014101	0.0208013	0.0146152	0.0167162	0.0159995	0.0212692
0.0235388	0.00911839	0.0196031	0.0105763	0.0121979	0.00835507	0.0124769	0.0161251	0.0136883	0.0143734	0.0152842	0.0137188	0.0133806	0.013598	0.0143009	0.0135942	0.0179692	0.010859	0.0134453	0.0138452	0.0150165	0.0199804	0.0198203	0.0216134	0.0331302	0.0138808	0.0143141	0.0153027	0.016706	0.013874	0.0159603	0.0141913	0.0152721	0.0138728	0.0132263	0.0166379	0.0162482	0.0181961	0.0164912	0.0141536	0.0160964	0.0169927	0.0151349	0.0174182	0.0118759	0.0257006	0.0144561	0.0155241	0.0117304	0.0154418
0.0240777	0.0094036	0.0185957	0.00841804	0.0112779	0.0086164	0.0138129	0.016597	0.0123789	0.0179974	0.0123166	0.0144598	0.013361	0.0130657	0.011475	0.0154016	0.0119045	0.0142205	0.0140093	0.0145656	0.0128136	0.0178873	0.0200741	0.0255058	0.0253778	0.0154912	0.0123691	0.0129093	0.0171795	0.0149403	0.0189595	0.0125664	0.0115042	0.0181149	0.0121064	0.0171248	0.0132988	0.0189711	0.0143423	0.0120391	0.0150014	0.0151406	0.0157559	0.0170517	0.00852337	0.0189512	0.0136179	0.018221	0.011453	0.0148876
0.0211947	0.00850134	0.0143433	0.00841143	0.0130721	0.00860964	0.0151552	0.0121286	0.0128845	0.0136582	0.0117719	0.0154624	0.0133505	0.0127995	0.0137592	0.014607	0.00948164	0.0103018	0.0122486	0.0118407	0.0174346	0.0257788	0.0161032	0.0191143	0.0190184	0.0138497	0.0137326	0.0144786	0.0156733	0.0127571	0.0140026	0.0144266	0.0144358	0.0154388	0.0142964	0.0137912	0.0156802	0.0138834	0.0201697	0.0143833	0.0128482	0.0135637	0.0147796	0.0224906	0.0098127	0.0205143	0.0141516	0.0149458	0.0140449	0.0177979
0.0263322	0.0116865	0.0217965	0.0103856	0.388282	0.0132781	0.0161161	0.0137056	0.0177685	0.013318	0.0156528	0.0132412	0.0142161	0.016314	0.01331	0.013353	0.0113467	0.0128039	0.0140153	0.0141745	0.0176455	0.0175957	0.0159382	0.0245779	0.023654	0.0156042	0.0154948	0.0170516	0.0168944	0.0141787	0.0160633	0.0159094	0.0156403	0.0147391	0.0152233	0.0170765	0.0147159	0.0178519	0.0202403	0.017759	0.0254479	0.0253434	0.0181263	0.0160206	0.0117992	0.0189592	0.0199025	0.014195	0.0130429	0.0191493
0.0307718	0.0146373	0.0188586	0.00963744	0.382543	0.0122826	0.0190111	0.020712	0.016505	0.0166965	0.0190707	0.0183303	0.015118	0.0177183	0.0144773	0.014012	0.0103294	0.0119267	0.0120509	0.0163094	0.0146339	0.0205946	0.0204296	0.0192399	0.0219861	0.0154297	0.0156053	0.0157731	0.0149064	0.0171045	0.0175855	0.0140755	0.0171224	0.0145742	0.0136329	0.0182047	0.0145513	0.014894	0.0156273	0.0178306	0.0146556	0.014551	0.0195831	0.0200658	0.0109022	0.0183397	0.0160251	0.0176857	0.0209577	0.0181119
0.0242682	0.0120209	0.0165052	0.01122	0.376113	0.00889639	0.0204139	0.0222516	0.0170415	0.0188174	0.0163108	0.0165012	0.0294474	0.0153419	0.0168503	0.0159021	0.0114006	0.0122967	0.0126565	0.0188623	0.0163263	0.0252167	0.0180991	0.0202574	0.0243308	0.0168364	0.018447	0.0152329	0.0174807	0.0157062	0.020143	0.014631	0.0154691	0.0156779	0.0150566	0.0171534	0.015104	0.0157252	0.0153568	0.0154028	0.0163186	0.014824	0.0212478	0.0172537	0.0107135	0.0228281	0.0165913	0.0126356	0.0180064	0.0194887
0.0280579	0.00943613	0.0212895	0.0112364	0.352113	0.012272	0.0198837	0.0166704	0.0220885	0.0150989	0.0141967	0.0144852	0.0133615	0.0177632	0.0153406	0.0130424	0.0109069	0.00924365	0.0142845	0.0133413	0.0141772	0.0242014	0.021045	0.023006	0.0263384	0.0149642	0.0145739	0.0166551	0.0149783	0.0144028	0.0187716	0.0147215	0.0150037	0.0149396	0.0129054	0.018243	0.0154584	0.0149846	0.0154365	0.0130762	0.0144766	0.0183659	0.0232784	0.0170389	0.010769	0.0237517	0.017218	0.0141421	0.0164553	0.0154511
0.0273777	0.0110716	0.0185635	0.0101087	0.423081	0.00931095	0.0148608	0.0176192	0.0207014	0.0155093	0.0201326	0.0131459	0.0156647	0.017441	0.0137325	0.01618	0.0140244	0.0126432	0.0116646	0.0140474	0.0141279	0.0185247	0.0140769	0.0229259	0.0244048	0.0127029	0.013406	0.012314	0.0126493	0.0146287	0.0142391	0.0203754	0.0212039	0.022196	0.0162153	0.0158421	0.0162153	0.0154754	0.017002	0.0172856	0.0293968	0.0148537	0.0199301	0.0183657	0.0116729	0.0180526	0.0174347	0.0157509	0.0134887	0.0151272
0.019233	0.681925	0.0163103	0.14579	0.0172118	0.00755745	0.0105118	0.0102661	0.0103486	0.0106403	0.010392	0.0113477	0.0108175	0.0101117	0.0130842	0.00995986	0.00692313	0.00736675	0.00985569	0.0108808	0.00986384	0.0113142	0.00967145	0.0164557	0.0146074	0.0109056	0.0126571	0.0131714	0.0116287	0.0103642	0.0112068	0.0116082	0.0121436	0.0119164	0.0115839	0.00857493	0.0122476	0.0116008	0.0108325	0.0106743	0.0107494	0.0151115	0.0133259	0.0132361	0.006582	0.0132457	0.012004	0.0112706	0.0123285	0.010493
0.0204878	0.0086366	0.0147128	0.00859552	0.0168897	0.0123359	0.0195891	0.016441	0.0162387	0.0145387	0.0127586	0.0131673	0.0161789	0.0163495	0.0201792	0.0177699	0.00998277	0.00786518	0.00860933	0.0168053	0.0134549	0.0155131	0.0117884	0.0204509	0.0165812	0.0129503	0.0105249	0.010312	0.0105928	0.0104013	0.012158	0.0138778	0.0132037	0.0124672	0.0124085	0.0117442	0.011316	0.013869	0.0126559	0.0155889	0.0218824	0.0175478	0.0131331	0.0153799	0.0130862	0.0157897	0.0141368	0.0143473	0.0166114	0.0122155
0.0176143	0.00547126	0.0128376	0.00816785	0.00826783	0.107785	0.0106577	0.00921357	0.00959208	0.0103154	0.00894851	0.00834146	0.00997226	0.00897637	0.0115463	0.00858358	0.00781206	0.00977348	0.00723701	0.0211591	0.00911148	0.012238	0.0131069	0.0132199	0.0183211	0.00864345	0.00874181	0.00979895	0.0102	0.00981061	0.00933133	0.00864743	0.00879716	0.00976472	0.00949223	0.0086799	0.00946258	0.00864193	0.0123126	0.00790042	0.0131404	0.0184336	0.0129997	0.0101108	0.0111865	0.0104283	0.00895563	0.00864915	0.00799769	0.00874158
0.0158691	0.0054826	0.0123305	0.00912536	0.00852512	0.117946	0.010525	0.00909886	0.0111201	0.0152805	0.00897964	0.009453	0.0108056	0.0103648	0.0115383	0.00944946	0.00909244	0.00804317	0.00921848	0.0220784	0.0103042	0.0130012	0.0142983	0.0143609	0.0159219	0.0099826	0.0119984	0.00981721	0.0115309	0.0121467	0.00921516	0.00882443	0.00968458	0.0102104	0.00995993	0.00789153	0.00962795	0.00782314	0.00919016	0.0073841	0.0152584	0.0191768	0.0107838	0.0116188	0.00808819	0.0102985	0.00739428	0.00825193	0.00803669	0.0114632
0.0170281	0.00577201	0.0131642	0.0072053	0.0116298	0.13452	0.0118395	0.00916268	0.00881645	0.0111078	0.00780302	0.00739292	0.00892797	0.00933256	0.0105754	0.0114113	0.00609153	0.00617648	0.00741513	0.0229672	0.00794512	0.0115669	0.0123594	0.0145692	0.0190481	0.00974799	0.00970487	0.00915424	0.00990706	0.0112656	0.00954761	0.0101893	0.00929618	0.0100029	0.0104857	0.00931081	0.00879463	0.0103326	0.0102707	0.00997405	0.0163642	0.0217984	0.0126145	0.0112765	0.0110074	0.0134974	0.00824252	0.0103641	0.00816917	0.00953543
0.0151605	0.00657883	0.0118628	0.00784217	0.0109357	0.126741	0.00910229	0.00887101	0.011935	0.0102921	0.00870346	0.00768698	0.010617	0.00903334	0.0099748	0.0107865	0.00655867	0.00685532	0.00750393	0.021218	0.00826115	0.0125081	0.0104366	0.0143224	0.0174771	0.010631	0.0109034	0.00885403	0.0100136	0.0103264	0.0110511	0.00883828	0.00781213	0.00983346	0.00924696	0.00858983	0.0117229	0.00853823	0.0100967	0.011247	0.0154966	0.0220045	0.0120465	0.0137159	0.0102084	0.0095709	0.00855306	0.00839054	0.00903465	0.0106921
0.0180742	0.00551733	0.0124137	0.00715505	0.00846007	0.116053	0.00956963	0.00807927	0.00967286	0.00891624	0.00873277	0.00758433	0.00991657	0.00988753	0.0127525	0.0110682	0.00740892	0.0084064	0.00814409	0.0209347	0.00918821	0.0110322	0.011373	0.0119981	0.0157657	0.00901171	0.00836718	0.00930863	0.00906782	0.0088596	0.00940991	0.0093016	0.0100347	0.00970214	0.00957216	0.00930874	0.00910852	0.00987666	0.0101063	0.00896282	0.0149985	0.0194402	0.0132839	0.0118643	0.00856129	0.0109454	0.00829079	0.0093133	0.00820653	0.0102603
0.0203019	0.00771231	0.0126898	0.00986307	0.0108687	0.13792	0.0111639	0.00762204	0.00898321	0.00872907	0.00917123	0.00868922	0.0102926	0.00966757	0.0090305	0.0115178	0.00811312	0.00701737	0.00824611	0.0245083	0.00981308	0.0121819	0.00935607	0.0170855	0.0194688	0.00994014	0.00797877	0.00917695	0.00881724	0.00820051	0.00909273	0.0100894	0.00994052	0.00943403	0.0095842	0.00786441	0.0103456	0.0114791	0.00971421	0.00957237	0.0180402	0.0263697	0.0098938	0.0114833	0.0114025	0.0155864	0.00838028	0.00852573	0.0083113	0.0115755
0.0171286	0.00660042	0.0124768	0.00676809	0.00970459	0.138121	0.0111674	0.0103619	0.00940059	0.0114353	0.01024	0.00970184	0.0110549	0.0107164	0.0106666	0.0110754	0.00721682	0.00722304	0.00767389	0.0236038	0.00814571	0.0119222	0.0126714	0.0143621	0.0178729	0.0131547	0.0133044	0.0130668	0.0113074	0.0144468	0.0110012	0.0110242	0.011351	0.00923295	0.0115093	0.0102332	0.00842371	0.0083028	0.0104751	0.00875814	0.0156875	0.0227747	0.0132581	0.0108009	0.0109616	0.0136839	0.00976515	0.00926313	0.0118213	0.0093729
0.0228386	0.00874475	0.0188583	0.00741263	0.0107478	0.00641017	0.012694	0.0112232	0.01249	0.00978765	0.0129676	0.0120879	0.0110391	0.0108066	0.011354	0.0120309	0.00781668	0.00735924	0.0104874	0.0119564	0.011713	0.0171971	0.0114845	0.0199238	0.0187618	0.0116763	0.0109503	0.0125536	0.00972444	0.0127315	0.0124491	0.0119047	0.0117033	0.0118613	0.0156899	0.0147745	0.0126737	0.011271	0.0134857	0.0122665	0.0156941	0.0122348	0.01281	0.0125207	0.0081054	0.01357	0.0163819	0.0123213	0.0140297	0.0116294
0.0272799	0.00962826	0.0172493	0.0103584	0.0121645	0.00708673	0.0143202	0.015979	0.0166354	0.0245724	0.0150063	0.0139494	0.0152156	0.0157129	0.0215722	0.0218075	0.0120412	0.0150376	0.0115223	0.0125309	0.0135499	0.0196427	0.0215265	0.0197098	0.0249192	0.0181057	0.0130798	0.0208945	0.0179034	0.0146498	0.0153999	0.0138539	0.0121652	0.0126766	0.0162936	0.0164871	0.0120941	0.0161055	0.0165708	0.0130077	0.0133139	0.0157345	0.0166612	0.0198346	0.0123441	0.0158651	0.0144004	0.0155294	0.0178913	0.0143374
0.0253691	0.00802071	0.0240616	0.00967584	0.0116451	0.00879032	0.013983	0.0135721	0.0228248	0.0163223	0.0143878	0.0122952	0.0189506	0.0151161	0.017464	0.0148524	0.0114523	0.0114247	0.0108655	0.0148265	0.0112028	0.019934	0.0181717	0.0186049	0.0276938	0.0166084	0.0165078	0.0144344	0.0165269	0.0140243	0.0179498	0.0138037	0.0132488	0.0159989	0.0130456	0.0191204	0.0117701	0.0140765	0.0198689	0.0151667	0.0180639	0.0143023	0.0176173	0.0150916	0.0113232	0.0216315	0.0134874	0.0126078	0.01289	0.0151258
0.0315607	0.00979094	0.0175784	0.0100397	0.0169091	0.0102529	0.0193521	0.0159588	0.0157082	0.01948	0.016936	0.0136687	0.0201648	0.0162046	0.0200124	0.014677	0.0143484	0.0124928	0.0168655	0.0159045	0.0134123	0.0233697	0.0215265	0.0275778	0.0291952	0.0162354	0.0154543	0.0182071	0.0131237	0.0181365	0.0148054	0.0153458	0.015669	0.0146658	0.0151476	0.0266454	0.0193159	0.015962	0.0245774	0.0165544	0.0175717	0.0140655	0.021092	0.0211717	0.0132393	0.0217358	0.0149942	0.0140163	0.0149398	0.0189954
0.0249658	0.00855302	0.022059	0.00964732	0.0149928	0.0100314	0.01583	0.0150462	0.0162554	0.0138374	0.0199455	0.0136641	0.0182568	0.0137993	0.0146119	0.0125649	0.0114679	0.0110005	0.0120413	0.0161267	0.0149972	0.0189225	0.0162011	0.0191122	0.0321998	0.0186878	0.0160654	0.0175118	0.0185469	0.0186786	0.0170047	0.0168527	0.0171701	0.0155701	0.0141897	0.0181609	0.0118878	0.0162296	0.0228288	0.014997	0.013815	0.0128641	0.0224787	0.0191509	0.0123162	0.0185513	0.0156066	0.0152718	0.0134238	0.0140149
0.0363375	0.0140639	0.0933345	0.0149455	0.020866	0.0152295	0.0236632	0.024189	0.0203229	0.0179527	0.0215586	0.0239022	0.0211284	0.0223832	0.0192212	0.031304	0.0165515	0.0158349	0.0163331	0.0207233	0.0224183	0.0306432	0.0251866	0.0386528	0.024843	0.0214169	0.0249568	0.0212125	0.0187673	0.0265252	0.0197704	0.0187795	0.0183331	0.0214493	0.0179116	0.0249582	0.0186816	0.0205985	0.0236601	0.0260048	0.0279937	0.0263848	0.0771192	0.0315485	0.0146016	0.0311129	0.0265953	0.0242264	0.0276468	0.0223162
0.024968	0.0101337	0.0171341	0.0121557	0.0135799	0.00928539	0.0156123	0.0171351	0.0178391	0.0169258	0.0154343	0.0146231	0.014482	0.0154241	0.0212321	0.0210666	0.0117132	0.0111573	0.0147054	0.0234016	0.0139692	0.019388	0.0199195	0.0245041	0.0290252	0.0201919	0.0158444	0.0151865	0.014671	0.0187901	0.016543	0.0167821	0.0157647	0.0160385	0.0183276	0.0173526	0.0156725	0.0177982	0.019733	0.0177686	0.0150985	0.0217354	0.0275969	0.0170373	0.0116302	0.0247816	0.0163975	0.0188118	0.0136706	0.0180489
0.0250207	0.0119434	0.019776	0.0109479	0.0142198	0.0109436	0.0889848	0.0792846	0.0834798	0.0679437	0.0811532	0.0771956	0.0965671	0.0757851	0.0723415	0.0598146	0.0173608	0.0133613	0.0120306	0.0146657	0.0694101	0.0446228	0.0202237	0.0297328	0.0258223	0.323229	0.325908	0.302473	0.273477	0.309567	0.318136	0.305022	0.312028	0.308756	0.317898	0.249136	0.296338	0.281829	0.301071	0.293502	0.016888	0.0174064	0.0241696	0.0239804	0.0159493	0.0239329	0.833086	0.793934	0.399828	0.0705848
0.0200043	0.00847894	0.01562	0.00757649	0.0102503	0.00832409	0.0127477	0.0112572	0.011929	0.0153444	0.0130369	0.0117342	0.0131361	0.0126819	0.00889814	0.0114393	0.0103606	0.0100975	0.0104212	0.0166281	0.0121682	0.0164697	0.0195023	0.0218921	0.0172844	0.0123506	0.0131603	0.0115449	0.0143453	0.010581	0.0107031	0.0138861	0.0102041	0.00972812	0.0118339	0.0120301	0.012087	0.0158288	0.0118544	0.0123184	0.0304341	0.0245732	0.012525	0.018819	0.271708	0.0153789	0.0128192	0.0130208	0.0114064	0.01316
0.0358363	0.0121515	0.027982	0.0131277	0.0268881	0.013719	0.0188993	0.0219671	0.0202452	0.01954	0.0186838	0.0184394	0.0186765	0.0175045	0.0166818	0.0170772	0.0152996	0.0144711	0.0149917	0.0427082	0.0210057	0.0295041	0.0189071	0.0306614	0.0223993	0.0260761	0.027172	0.0248948	0.0260605	0.0308021	0.0291602	0.0233212	0.0198357	0.0216872	0.0159997	0.0334411	0.0247463	0.0174798	0.0266418	0.0235895	0.036996	0.0371902	0.0275795	0.0252846	0.0350175	0.0241064	0.0217767	0.0197677	0.0215689	0.0235751
0.0263753	0.0105029	0.0172169	0.0124266	0.0149557	0.010549	0.0164923	0.0224586	0.0244281	0.0188047	0.020652	0.0236859	0.0159936	0.0159468	0.0196684	0.0194281	0.0135407	0.0141915	0.0134279	0.0230503	0.0151255	0.0172225	0.0187468	0.0298676	0.0312744	0.0194912	0.0167375	0.0174685	0.015161	0.0183789	0.0178473	0.0217078	0.0188254	0.0183844	0.017499	0.0152179	0.0183554	0.0169936	0.0190482	0.0219575	0.0134121	0.0268461	0.0208853	0.0216894	0.0127872	0.0272469	0.0173218	0.0161921	0.0154978	0.0154688
0.039163	0.00898702	0.0241756	0.00974697	0.0185428	0.010135	0.0172479	0.0157752	0.0194094	0.0150355	0.0170512	0.0167425	0.0139828	0.0130519	0.0162391	0.0148105	0.0143831	0.0131724	0.0166715	0.0328724	0.0198871	0.0207112	0.0163684	0.0232851	0.0230875	0.0198249	0.0159131	0.0152523	0.0164322	0.0144682	0.0174985	0.0167172	0.0161083	0.0160394	0.0143362	0.0192363	0.0153982	0.0182535	0.0255248	0.0248491	0.0245035	0.0305277	0.0242002	0.0154	0.0214542	0.0182858	0.0217595	0.0170039	0.0144666	0.0150831
0.01692	0.00571075	0.00998544	0.00719429	0.00973928	0.14345	0.00962211	0.00961289	0.0102897	0.0134477	0.00804894	0.00859649	0.00954964	0.00938165	0.0100349	0.0112715	0.00744955	0.00874397	0.00903953	0.0268516	0.0107287	0.015981	0.0131352	0.0168895	0.0180813	0.0114378	0.00796236	0.00806372	0.0095258	0.00905665	0.00901096	0.0102294	0.00833498	0.00888173	0.00797042	0.00866129	0.0100307	0.00905457	0.00769384	0.00786759	0.0221086	0.0239698	0.0105448	0.0123022	0.00830441	0.0131633	0.00937829	0.0112967	0.0112392	0.0117696
0.0196357	0.0066856	0.0110023	0.00524239	0.00855773	0.121438	0.0088486	0.00861521	0.00828966	0.0140455	0.00902988	0.0102931	0.0101547	0.00944993	0.00967477	0.00852852	0.00781858	0.00871114	0.00881762	0.0244569	0.0109183	0.0126884	0.0132597	0.0139571	0.0169548	0.0085927	0.00926984	0.00735783	0.0095775	0.00830218	0.0110042	0.0135254	0.00859974	0.0101071	0.00840929	0.0107747	0.0100912	0.00901119	0.00951705	0.00896435	0.0242794	0.0233846	0.0115219	0.0118607	0.00917802	0.0124828	0.00961577	0.0101747	0.00699525	0.0112071
0.0165895	0.00777489	0.00944074	0.00684498	0.00890072	0.119238	0.00954763	0.00860208	0.00881978	0.0151029	0.00986139	0.00961005	0.00946324	0.0080876	0.00925753	0.009889	0.00807899	0.00907197	0.00839469	0.0228609	0.00860655	0.0124881	0.0133883	0.0152262	0.0145446	0.0087226	0.00882186	0.00887139	0.0100869	0.00743199	0.012144	0.0105506	0.00844588	0.00883024	0.00926508	0.00927906	0.00937608	0.00941922	0.00978204	0.00881299	0.0186047	0.0225249	0.0104892	0.0114837	0.00828663	0.0128793	0.00845472	0.0100161	0.00849107	0.0120293
0.0269328	0.00957797	0.0168222	0.0108736	0.0139567	0.00971648	0.43821	0.491909	0.647461	0.421065	0.432906	0.333704	0.336229	0.437696	0.334271	0.295531	0.012257	0.0114063	0.0158298	0.0130126	0.172755	0.0737082	0.0155507	0.0213575	0.0212903	0.0871968	0.0992127	0.0956968	0.0932914	0.090889	0.0988645	0.0977314	0.0950346	0.0970701	0.0829185	0.0685326	0.0953932	0.0909334	0.0836933	0.0893688	0.0159617	0.0146569	0.0243177	0.0242282	0.013376	0.0271443	0.0954982	0.0997192	0.0993211	0.176988
0.035121	0.0110148	0.0222578	0.0123602	0.0332899	0.0112353	0.021118	0.0172454	0.0157994	0.0285479	0.0182675	0.0194267	0.0171722	0.0196189	0.0177525	0.0174463	0.0146535	0.0146024	0.015984	0.0360922	0.0246737	0.0277792	0.0196832	0.0280006	0.0391207	0.0166499	0.0168394	0.0157733	0.0162933	0.0204239	0.0183641	0.0208472	0.0163904	0.0204004	0.0180057	0.0188614	0.0218495	0.0245543	0.0184903	0.0185848	0.0313308	0.0330754	0.0228331	0.0213678	0.0348286	0.0263867	0.0235116	0.0185542	0.023195	0.0218392
0.0190331	0.00933501	0.0176324	0.00957215	0.010101	0.0101376	0.0110833	0.0103282	0.0111507	0.00809128	0.0111636	0.010381	0.015871	0.0112749	0.0129945	0.0106823	0.00932473	0.00837203	0.0099153	0.0108649	0.0130509	0.0154045	0.0100418	0.0151486	0.0195943	0.0136396	0.012097	0.0122049	0.00999635	0.0117452	0.0114564	0.0105283	0.0132204	0.0113127	0.0146585	0.0138141	0.0139645	0.012791	0.0096383	0.0115183	0.0103416	0.0135041	0.0168823	0.0163255	0.0110159	0.0143275	0.0126174	0.0128086	0.0120585	0.0121106
0.0184661	0.00782695	0.015152	0.00756716	0.0119966	0.00840118	0.00994151	0.0100205	0.010239	0.011946	0.0118339	0.00912158	0.0119335	0.010939	0.0101241	0.0109507	0.00956389	0.00745682	0.00889111	0.0184934	0.0104156	0.012111	0.0110134	0.0169018	0.0281764	0.0109937	0.0133838	0.0106571	0.00932552	0.0118023	0.0129676	0.0138198	0.00982031	0.0109756	0.0113362	0.0101477	0.0105599	0.0140112	0.0117387	0.0111752	0.0296992	0.0263991	0.0122845	0.0145617	0.219862	0.0156752	0.0108133	0.00977865	0.0115043	0.0103557
0.0292197	0.010325	0.0158365	0.0144878	0.0164237	0.00863078	0.0141333	0.0213439	0.0215948	0.0146528	0.0204709	0.0212421	0.0159026	0.0155451	0.0139256	0.0133053	0.0140281	0.0127273	0.0118064	0.0182754	0.01555	0.0187852	0.237092	0.0250003	0.0285977	0.0181399	0.0183463	0.0172648	0.0166183	0.0178013	0.0156725	0.0178458	0.0146104	0.0142246	0.0150258	0.0189208	0.0148477	0.0168616	0.0148267	0.0171511	0.0169047	0.0145725	0.0199011	0.0264874	0.0123674	0.0167697	0.0168567	0.0270627	0.0186371	0.0145181
0.0297111	0.0132823	0.0210552	0.0101773	0.0125722	0.0157814	0.0129774	0.0145339	0.0143745	0.0191584	0.0154477	0.0111629	0.0153265	0.0235488	0.0159587	0.0186344	0.0119784	0.0125151	0.0112257	0.0586623	0.0130631	0.0282553	0.0165885	0.021104	0.0194983	0.0146168	0.0142455	0.0177759	0.0150949	0.0159377	0.0134346	0.0117653	0.0141273	0.0164114	0.0134528	0.0127467	0.0161254	0.0148932	0.0176609	0.017403	0.0864439	0.0747927	0.0204379	0.0216765	0.0179377	0.0158291	0.0173114	0.016222	0.0152719	0.0171576
0.0310822	0.0106678	0.0192962	0.0126362	0.0133412	0.0101118	0.156858	0.172768	0.166519	0.160292	0.20456	0.182555	0.14311	0.169524	0.146427	0.145072	0.0148817	0.0148945	0.0148652	0.0170356	0.237848	0.0979148	0.014981	0.0253851	0.0234536	0.110514	0.0999173	0.087977	0.0776205	0.082008	0.0890488	0.0751173	0.0936268	0.0817372	0.0966279	0.0705491	0.0875077	0.0971294	0.0854202	0.0903004	0.0181551	0.0154401	0.0198112	0.019751	0.012786	0.0233523	0.0761836	0.083443	0.0789031	0.244709
0.0242793	0.00666022	0.0125832	0.00787118	0.0114292	0.00672329	0.0110609	0.0140507	0.0134577	0.0134388	0.0113398	0.0140053	0.01574	0.0106564	0.0115711	0.0116479	0.0099165	0.0106203	0.00853486	0.0115758	0.0129896	0.0143083	0.0145402	0.015951	0.0140518	0.0119212	0.0108096	0.0119547	0.0112979	0.0115045	0.0124685	0.011728	0.0133541	0.010275	0.0114448	0.0100516	0.0138795	0.010306	0.0178772	0.0148451	0.0137764	0.0114505	0.0119159	0.0152171	0.00896843	0.0143324	0.010299	0.0113121	0.0131893	0.0122645
0.0302886	0.0124267	0.0313392	0.0147027	0.0148061	0.0129192	0.0203804	0.0210198	0.0198189	0.0178722	0.0205767	0.0178706	0.0185118	0.0196881	0.0183718	0.0229867	0.0124301	0.0147988	0.0143299	0.154148	0.0231338	0.0275367	0.0217279	0.0251295	0.0282963	0.0160995	0.0176029	0.0181373	0.0167421	0.0204406	0.0162772	0.0179788	0.0222736	0.0166337	0.0189422	0.0143224	0.0174592	0.0205341	0.0195606	0.0175989	0.287782	0.160907	0.0339773	0.0333063	0.0169094	0.0265487	0.0178782	0.0187225	0.0187533	0.0225585
0.0239267	0.0122956	0.0157661	0.00874149	0.0141211	0.0102148	0.0145762	0.0204056	0.0198277	0.02302	0.01441	0.0167176	0.0211657	0.0137877	0.0140038	0.0157693	0.0180019	0.0204997	0.0115402	0.0130152	0.0158702	0.022291	0.0195638	0.0280139	0.0233937	0.0176115	0.0160005	0.0173617	0.0175015	0.0155144	0.0187113	0.015564	0.0161616	0.0160925	0.0151101	0.0193701	0.0128537	0.0123259	0.019545	0.0155227	0.0235379	0.0146224	0.0144799	0.0232233	0.0148563	0.0190801	0.0143588	0.0161296	0.0165816	0.0154755
0.0206121	0.0123946	0.0173156	0.00864768	0.0111994	0.0199041	0.0136797	0.0114513	0.0152334	0.0144319	0.0114607	0.0115099	0.0127577	0.012501	0.0113515	0.0125144	0.0110772	0.0100433	0.0116598	0.237547	0.0112027	0.0156072	0.0137962	0.0176357	0.0236648	0.0127962	0.0155302	0.0182683	0.0166251	0.0155804	0.0167011	0.0192264	0.0213	0.0248577	0.0155459	0.0131283	0.0120677	0.0121232	0.0163707	0.0156835	0.255238	0.291407	0.0167913	0.0145974	0.0144345	0.0202793	0.01329	0.0158312	0.0151524	0.012062
0.0197047	0.00775271	0.0137054	0.00783274	0.009648	0.00689478	0.0122056	0.010785	0.0133949	0.00852649	0.0112483	0.0155013	0.0127568	0.00997985	0.0130499	0.0107671	0.0083022	0.00991148	0.00936304	0.0101826	0.0137438	0.0110353	0.0105819	0.0146114	0.0183456	0.013078	0.0140666	0.0132813	0.00988909	0.0126566	0.0107038	0.0114364	0.0114437	0.0122087	0.0117691	0.0109327	0.0130021	0.0120414	0.0148095	0.0147931	0.0118676	0.00996954	0.0137539	0.0161503	0.0101901	0.0235223	0.0106097	0.0108017	0.0111338	0.0125898
0.0329352	0.0138524	0.0201844	0.0121751	0.0172779	0.0120883	0.0243374	0.0207998	0.0212744	0.0184576	0.0252432	0.0242902	0.025738	0.0211339	0.0240409	0.0249952	0.0155032	0.0172822	0.0143313	0.0360031	0.0261045	0.0248295	0.0233236	0.0274567	0.0233649	0.016014	0.0194355	0.0182404	0.0165046	0.0232089	0.0198337	0.0212684	0.0244348	0.0204061	0.0190498	0.0203317	0.0164558	0.0232229	0.0207363	0.0204335	0.0473536	0.036916	0.0260518	0.0261234	0.0338458	0.0279168	0.0168508	0.0192295	0.0210891	0.0203643
0.133162	0.0268878	0.0355699	0.0152365	0.0261964	0.0233402	0.0320976	0.0217242	0.0238392	0.0232187	0.0317316	0.0234498	0.0334955	0.0273252	0.0259894	0.0296991	0.0237179	0.0181168	0.0225979	0.024576	0.0258476	0.0350589	0.0227847	0.0592915	0.0988192	0.0219017	0.0241054	0.0212311	0.0241954	0.0238224	0.0299588	0.0361221	0.0399499	0.0347277	0.0267384	0.035137	0.0258471	0.0246994	0.0276991	0.0303963	0.0330167	0.0278429	0.0342962	0.0460744	0.024594	0.0393035	0.0264675	0.0244944	0.0209764	0.0245747
[truncated: 154 more columns]
