# Supplementary material for: Prediction of drug–target interaction by label propagation with mutual interaction information derived from heterogeneous network
Source: Royal Society of Chemistry journal article supplement (doi:10.1039/c5mb00615e), 2015-12-01
Supplement: c5mb00615e6.xlsx [file c5mb00615e6.xlsx]

## Sheet: DT_network
Table S12 G-protein coupled receptors (GPCRs) dataset drug-target interaction network
	D00049	D00059	D00079	D00094	D00095	D00106	D00110	D00113	D00136	D00139	D00180	D00225	D00227	D00232	D00234	D00235	D00241	D00255	D00270	D00274	D00281	D00283	D00295	D00300	D00301	D00306	D00318	D00332	D00336	D00356	D00364	D00371	D00380	D00394	D00397	D00400	D00410	D00411	D00415	D00419	D00422	D00426	D00432	D00437	D00440	D00442	D00443	D00451	D00454
hsa:10161	0	0	0	0	0	0	0	0	0	0	0	0	0	0	0	0	0	0	0	0	0	0	0	0	0	0	0	0	0	0	0	0	0	0	0	0	0	0	0	0	0	0	0	0	0	0	0	0	0
hsa:10800	0	0	0	0	0	0	0	0	0	0	0	0	0	0	0	0	0	0	0	0	0	0	0	0	0	0	0	0	0	0	0	0	0	0	0	0	0	1	0	0	0	0	0	0	0	0	0	0	0
hsa:11255	0	0	0	0	0	0	0	0	0	0	0	0	0	0	1	0	0	0	0	0	0	0	0	1	0	0	1	0	0	0	0	0	0	0	0	0	0	0	0	0	0	0	0	0	0	0	0	0	0
hsa:1128	0	0	0	0	0	0	0	1	0	0	0	0	0	1	0	0	0	0	0	1	0	1	0	0	0	0	0	0	0	0	0	0	0	0	1	0	0	0	0	0	0	0	0	0	0	0	0	0	1
hsa:1129	0	0	0	0	0	0	0	1	0	0	0	0	0	1	0	0	0	0	0	1	0	1	0	0	0	0	0	0	0	0	0	0	0	0	1	0	0	0	0	0	0	0	0	0	0	0	0	0	1
hsa:1131	0	0	0	0	0	0	0	1	0	0	0	0	0	1	0	0	0	0	0	0	0	0	0	0	0	0	0	0	0	0	0	0	0	0	0	0	0	0	0	0	0	0	0	0	0	0	0	0	1
hsa:1132	0	0	0	0	0	0	0	1	0	0	0	0	0	0	0	0	0	0	0	0	0	0	0	0	0	0	0	0	0	0	0	0	0	0	1	0	0	0	0	0	0	0	0	0	0	0	0	0	1
hsa:1133	0	0	0	0	0	0	0	1	0	0	0	0	0	0	0	0	0	0	0	0	0	0	0	0	0	0	0	0	0	0	0	0	0	0	0	0	0	0	0	0	0	0	0	0	0	0	0	0	1
hsa:1234	0	0	0	0	0	0	0	0	0	0	0	0	0	0	0	0	0	0	0	0	0	0	0	0	0	0	0	0	0	0	0	0	0	0	0	0	0	0	0	0	0	0	0	0	0	0	0	0	0
hsa:1241	0	0	0	0	0	0	0	0	0	0	0	0	0	0	0	0	0	0	0	0	0	0	0	0	0	0	0	0	0	0	0	0	0	0	0	0	0	1	0	0	0	0	0	0	0	0	0	0	0
hsa:1268	0	0	0	0	0	0	0	0	0	0	0	0	0	0	0	0	0	0	0	0	0	0	0	0	0	1	0	0	0	0	0	0	0	0	0	0	0	0	0	0	0	0	0	0	0	0	0	0	0
hsa:134	0	0	0	0	0	0	0	0	0	0	0	0	1	0	0	0	0	0	0	0	0	0	0	0	0	0	0	1	0	0	0	0	0	0	0	0	0	0	0	0	0	0	0	0	0	0	0	0	0
hsa:135	0	0	0	0	0	0	0	0	0	0	0	0	1	0	0	0	0	0	0	0	0	0	0	0	0	0	0	0	0	0	0	0	0	0	0	0	0	0	0	0	0	0	0	0	0	0	0	0	0
hsa:136	0	0	0	0	0	0	0	0	0	0	0	0	0	0	0	0	0	0	0	0	0	0	0	0	0	0	0	0	0	0	0	1	0	0	0	0	0	0	0	0	0	0	0	0	0	0	0	0	0
hsa:140	0	0	0	0	0	0	0	0	0	0	0	0	1	0	0	0	0	0	0	0	0	0	0	0	0	0	0	0	0	0	0	0	0	0	0	0	0	0	0	0	0	0	0	0	0	0	0	0	0
hsa:146	0	0	0	0	0	0	0	0	0	0	0	0	0	0	0	0	0	1	0	0	1	1	0	0	0	0	0	0	0	0	0	0	0	0	0	0	0	0	0	0	0	1	0	1	0	0	0	0	1
hsa:147	0	0	0	0	0	0	0	0	0	0	0	0	0	0	0	0	0	1	0	0	1	1	0	0	0	0	0	0	0	0	0	0	0	0	0	0	0	0	0	0	0	1	0	1	0	0	0	0	1
hsa:148	0	0	0	0	1	0	0	0	0	0	0	0	0	0	0	0	0	1	0	0	1	1	0	0	0	0	0	0	0	0	0	0	0	0	0	0	0	0	0	0	0	1	0	1	0	0	0	0	1
hsa:150	0	0	0	0	0	0	0	0	1	0	0	0	0	0	0	0	0	1	1	0	1	1	0	0	0	0	0	1	0	0	0	0	0	0	0	0	0	0	0	0	0	0	0	1	0	0	0	0	1
hsa:151	0	0	0	0	0	0	0	0	1	0	0	0	0	0	0	0	0	1	1	0	1	1	0	0	0	0	0	0	0	0	0	0	0	0	0	0	0	0	0	0	0	0	0	1	0	0	0	0	1
hsa:152	0	0	0	0	0	0	0	0	0	0	0	0	0	0	0	0	0	0	0	0	1	0	0	0	0	0	0	0	0	0	0	0	0	0	0	0	0	0	0	0	0	0	0	0	0	0	0	0	0
hsa:153	0	0	0	0	1	0	0	0	0	0	0	0	0	0	0	1	0	1	0	0	0	0	0	0	0	0	0	0	0	0	0	0	0	0	0	0	0	0	0	0	0	0	1	1	0	0	0	0	1
hsa:154	0	0	0	0	1	0	0	0	0	0	0	0	0	0	0	1	0	1	0	0	0	0	0	0	0	0	0	0	0	0	0	0	0	0	0	0	0	0	0	0	0	0	1	1	0	0	0	0	1
hsa:155	0	0	0	0	0	0	0	0	0	0	0	0	0	0	0	0	0	1	0	0	0	0	0	0	0	0	0	0	0	0	0	0	0	0	0	0	0	0	0	0	0	0	1	1	0	0	0	0	1
hsa:1812	0	1	0	0	0	0	1	0	0	0	0	0	0	0	0	0	0	0	1	0	0	1	0	0	0	0	0	0	0	0	0	0	0	0	0	0	0	0	0	0	0	0	0	0	0	0	0	0	1
hsa:1813	0	1	0	0	0	0	0	0	1	0	0	0	0	0	0	0	0	0	1	0	0	1	0	0	0	0	0	0	0	0	0	0	0	0	0	0	0	0	0	0	0	0	0	0	0	0	0	0	1
hsa:1814	0	0	0	0	0	0	1	0	1	0	0	0	0	0	0	0	0	0	1	0	0	0	0	0	0	0	0	0	0	0	0	0	0	0	0	0	0	0	0	0	0	0	0	0	0	0	0	0	1
hsa:1815	0	0	0	0	0	0	0	0	0	0	0	0	0	0	0	0	0	0	0	0	0	1	0	0	0	0	0	0	0	0	0	0	0	0	0	0	0	0	0	0	0	0	0	0	0	0	0	0	1
hsa:1816	0	0	0	0	0	0	0	0	0	0	0	0	0	0	0	0	0	0	1	0	0	1	0	0	0	0	0	0	0	0	0	0	0	0	0	0	0	0	0	0	0	0	0	0	0	0	0	0	1
hsa:185	0	0	0	0	0	0	0	0	0	0	0	0	0	0	0	0	0	0	0	0	0	0	0	0	0	0	0	0	0	0	0	0	0	0	0	1	0	0	0	0	0	0	0	0	0	0	1	0	0
hsa:1909	0	0	0	0	0	0	0	0	0	0	0	0	0	0	0	0	0	0	0	0	0	0	0	0	0	0	0	0	0	0	0	0	0	0	0	0	0	0	0	0	0	0	0	0	0	0	0	0	0
hsa:1910	0	0	0	0	0	0	0	0	0	0	0	0	0	0	0	0	0	0	0	0	0	0	0	0	0	0	0	0	0	0	0	0	0	0	0	0	0	0	0	0	0	0	0	0	0	0	0	0	0
hsa:222545	0	0	0	0	0	0	0	0	0	0	0	0	0	0	0	0	0	0	0	0	0	0	0	0	0	0	0	0	0	0	0	0	0	0	0	0	0	0	0	0	0	0	0	0	0	0	0	0	0
hsa:23620	0	0	0	0	0	0	0	0	0	0	0	0	0	0	0	0	0	0	0	0	0	0	0	0	0	0	0	0	0	0	0	0	0	0	0	0	0	0	0	0	0	0	0	0	0	0	0	0	0
hsa:2550	0	0	0	0	0	0	0	0	0	0	0	0	0	0	0	0	1	0	0	0	0	0	0	0	0	0	0	0	0	0	0	0	0	0	0	0	0	0	0	0	0	0	0	0	0	0	0	0	0
hsa:2846	0	0	0	0	0	0	0	0	0	0	0	0	0	0	0	0	0	0	0	0	0	0	0	0	0	0	0	0	0	0	0	0	0	0	0	0	0	0	0	0	0	0	0	0	0	0	0	0	0
hsa:2911	0	0	0	0	0	0	0	0	0	0	0	0	0	0	0	0	0	0	0	0	0	0	0	0	0	0	0	0	0	0	0	0	0	0	0	0	0	0	0	0	0	0	0	0	0	0	0	0	0
hsa:2912	0	0	0	0	0	0	0	0	0	0	0	0	0	0	0	0	0	0	0	0	0	0	0	0	0	0	0	0	0	0	0	0	0	0	0	0	0	0	0	0	0	0	0	0	0	0	0	0	0
hsa:2913	0	0	0	0	0	0	0	0	0	0	0	0	0	0	0	0	0	0	0	0	0	0	0	0	0	0	0	0	0	0	0	0	0	0	0	0	0	0	0	0	0	0	0	0	0	0	0	0	0
hsa:2914	0	0	0	0	0	0	0	0	0	0	0	0	0	0	0	0	0	0	0	0	0	0	0	0	0	0	0	0	0	0	0	0	0	0	0	0	0	0	0	0	0	0	0	0	0	0	0	0	0
hsa:2915	0	0	0	0	0	0	0	0	0	0	0	0	0	0	0	0	0	0	0	0	0	0	0	0	0	0	0	0	0	0	0	0	0	0	0	0	0	0	0	0	0	0	0	0	0	0	0	0	0
hsa:2916	0	0	0	0	0	0	0	0	0	0	0	0	0	0	0	0	0	0	0	0	0	0	0	0	0	0	0	0	0	0	0	0	0	0	0	0	0	0	0	0	0	0	0	0	0	0	0	0	0
hsa:2917	0	0	0	0	0	0	0	0	0	0	0	0	0	0	0	0	0	0	0	0	0	0	0	0	0	0	0	0	0	0	0	0	0	0	0	0	0	0	0	0	0	0	0	0	0	0	0	0	0
hsa:2918	0	0	0	0	0	0	0	0	0	0	0	0	0	0	0	0	0	0	0	0	0	0	0	0	0	0	0	0	0	0	0	0	0	0	0	0	0	0	0	0	0	0	0	0	0	0	0	0	0
hsa:3269	0	0	0	0	0	0	0	0	0	0	0	0	0	0	1	0	0	0	0	0	0	1	0	1	0	0	0	0	0	0	1	0	0	0	0	0	0	0	0	0	0	0	0	0	0	0	0	0	1
hsa:3274	0	0	0	0	0	0	0	0	0	0	0	0	0	0	0	0	0	0	0	0	0	0	1	0	0	0	1	0	0	0	0	0	0	0	0	0	0	0	0	0	1	0	0	0	1	0	0	0	0
hsa:3350	0	0	0	0	0	0	0	0	0	0	0	0	0	0	0	0	0	0	0	0	0	1	0	0	0	0	0	0	0	0	0	0	0	0	0	0	0	0	0	0	0	0	0	0	0	0	0	1	0
hsa:3351	0	0	0	0	0	0	0	0	0	0	0	0	0	0	0	0	0	0	0	0	0	1	0	0	0	0	0	0	0	0	0	0	0	0	0	0	0	0	1	0	0	0	0	0	0	0	0	1	0
hsa:3352	0	0	0	0	0	0	0	0	0	0	0	0	0	0	0	0	0	0	0	0	0	1	0	0	0	0	0	0	0	0	0	0	0	0	0	0	0	0	1	0	0	0	0	0	0	0	0	1	0
hsa:3354	0	0	0	0	0	0	0	0	0	0	0	0	0	0	0	0	0	0	0	0	0	1	0	0	0	0	0	0	0	0	0	0	0	0	0	0	0	0	0	0	0	0	0	0	0	0	0	1	0
hsa:3355	0	0	0	0	0	0	0	0	0	0	0	0	0	0	0	0	0	0	0	0	0	1	0	0	0	0	0	0	0	0	0	0	0	0	0	0	0	0	0	0	0	0	0	0	0	0	0	1	0
hsa:3356	0	0	0	0	0	0	0	0	0	0	0	0	0	0	0	0	0	0	1	0	0	1	0	0	0	0	0	0	0	0	0	0	0	0	0	0	0	0	0	0	0	1	0	0	0	0	0	1	1
hsa:3357	0	0	0	0	0	0	0	0	0	0	0	0	0	0	0	0	0	0	0	0	0	1	0	0	0	0	0	0	0	0	0	0	0	0	0	0	0	0	0	0	0	0	0	0	0	0	0	1	0
hsa:3358	0	0	0	0	0	0	0	0	0	0	0	0	0	0	0	0	0	0	0	0	0	1	0	0	0	0	0	0	0	0	0	0	0	0	0	0	0	0	0	0	0	0	0	0	0	0	0	1	1
hsa:3360	0	0	0	0	0	0	0	0	0	0	0	0	0	0	0	0	0	0	0	1	0	1	0	0	0	0	0	0	0	0	0	0	0	0	0	0	0	0	0	0	0	0	0	0	0	0	0	1	0
hsa:3361	0	0	0	0	0	0	0	0	0	0	0	0	0	0	0	0	0	0	0	0	0	1	0	0	0	0	0	0	0	0	0	0	0	0	0	0	0	0	0	0	0	0	0	0	0	0	0	1	0
hsa:3362	0	0	0	0	0	0	0	0	0	0	0	0	0	0	0	0	0	0	0	0	0	1	0	0	0	0	0	0	0	0	0	0	0	0	0	0	0	0	0	0	0	0	0	0	0	0	0	1	1
hsa:3363	0	0	0	0	0	0	0	0	0	0	0	0	0	0	0	0	0	0	0	0	0	1	0	0	0	0	0	0	0	0	0	0	0	0	0	0	0	0	0	0	0	0	0	0	0	0	0	0	0
hsa:338442	1	0	0	0	0	0	0	0	0	0	0	0	0	0	0	0	0	0	0	0	0	0	0	0	0	0	0	0	0	0	0	0	0	0	0	0	0	0	0	0	0	0	0	0	0	0	0	0	0
hsa:3577	0	0	0	0	0	0	0	0	0	1	0	1	0	0	0	0	0	0	0	0	0	0	0	0	0	0	0	0	0	0	0	0	1	1	0	0	1	0	0	0	0	0	0	1	0	0	0	0	0
hsa:4543	0	0	0	0	0	0	0	0	0	0	0	0	0	0	0	0	0	0	0	0	0	0	0	0	0	0	0	0	0	0	0	0	0	0	0	0	0	0	0	0	0	0	0	0	0	0	0	0	0
hsa:4985	0	0	0	0	0	0	0	0	0	0	0	0	0	0	0	0	0	0	0	0	0	0	0	0	0	0	0	0	0	0	0	0	0	0	0	0	0	0	0	0	0	0	0	0	0	0	0	0	0
hsa:4986	0	0	0	0	0	0	1	0	0	0	0	0	0	0	0	0	0	0	0	0	0	0	0	0	0	0	0	0	0	0	0	0	0	0	0	0	0	0	0	0	0	0	0	0	0	0	0	0	0
hsa:4988	0	0	0	0	0	0	0	0	0	0	0	0	0	0	0	0	0	0	0	0	0	0	0	0	1	0	0	0	0	0	0	0	0	0	0	0	0	0	0	0	0	0	0	0	0	0	0	0	0
hsa:5028	0	0	0	0	0	0	0	0	0	0	0	0	0	0	0	0	0	0	0	0	0	0	0	0	0	0	0	0	0	0	0	0	0	0	0	0	0	0	0	0	0	0	0	0	0	0	0	0	0
hsa:5029	0	0	0	0	0	0	0	0	0	0	0	0	0	0	0	0	0	0	0	0	0	0	0	0	0	0	0	0	0	0	0	0	0	0	0	0	0	0	0	0	0	0	0	0	0	0	0	0	0
hsa:5030	0	0	0	0	0	0	0	0	0	0	0	0	0	0	0	0	0	0	0	0	0	0	0	0	0	0	0	0	0	0	0	0	0	0	0	0	0	0	0	0	0	0	0	0	0	0	0	0	0
hsa:5031	0	0	0	0	0	0	0	0	0	0	0	0	0	0	0	0	0	0	0	0	0	0	0	0	0	0	0	0	0	0	0	0	0	0	0	0	0	0	0	0	0	0	0	0	0	0	0	0	0
hsa:5032	0	0	0	0	0	0	0	0	0	0	0	0	0	0	0	0	0	0	0	0	0	0	0	0	0	0	0	0	0	0	0	0	0	0	0	0	0	0	0	0	0	0	0	0	0	0	0	0	0
hsa:552	0	0	0	0	0	0	0	0	0	0	0	0	0	0	0	0	0	0	0	0	0	0	0	0	0	0	0	0	0	0	0	0	0	0	0	0	0	0	0	0	0	0	0	0	0	0	0	0	0
hsa:554	0	0	0	0	0	0	0	0	0	0	0	0	0	0	0	0	0	0	0	0	0	0	0	0	0	0	0	0	0	0	0	0	0	0	0	0	0	0	0	0	0	0	0	0	0	0	0	0	0
hsa:56413	0	0	0	0	0	0	0	0	0	0	0	0	0	0	0	0	0	0	0	0	0	0	0	0	0	0	0	0	0	0	0	0	0	0	0	0	0	1	0	0	0	0	0	0	0	0	0	0	0
hsa:57105	0	0	0	0	0	0	0	0	0	0	0	0	0	0	0	0	0	0	0	0	0	0	0	0	0	0	0	0	0	0	0	0	0	0	0	0	0	1	0	0	0	0	0	0	0	0	0	0	0
hsa:5724	0	0	0	0	0	0	0	0	0	0	0	0	0	0	0	0	0	0	0	0	0	0	0	0	0	0	0	0	0	0	0	0	0	0	0	0	0	0	0	0	0	0	0	0	0	0	0	0	0
hsa:5729	0	0	0	0	0	0	0	0	0	0	0	0	0	0	0	0	0	0	0	0	0	0	0	0	0	0	0	0	0	0	0	0	0	0	0	0	0	0	0	0	0	0	0	0	0	0	0	0	0
hsa:5731	0	0	0	0	0	0	0	0	0	0	1	0	0	0	0	0	0	0	0	0	0	0	0	0	0	0	0	0	0	0	0	0	0	0	0	0	0	0	0	0	0	0	0	0	0	0	0	0	0
hsa:5732	0	0	0	0	0	0	0	0	0	0	1	0	0	0	0	0	0	0	0	0	0	0	0	0	0	0	0	0	0	0	0	0	0	0	0	0	0	0	0	1	0	0	0	0	0	0	0	0	0
hsa:5733	0	0	0	0	0	0	0	0	0	0	0	0	0	0	0	0	0	0	0	0	0	0	0	0	0	0	0	0	0	0	0	0	0	0	0	0	0	0	0	1	0	0	0	0	0	0	0	0	0
hsa:5737	0	0	0	0	0	0	0	0	0	0	0	0	0	0	0	0	0	0	0	0	0	0	0	0	0	0	0	0	0	1	0	0	0	0	0	0	0	0	0	0	0	0	0	0	0	0	0	0	0
hsa:5739	0	0	1	0	0	0	0	0	0	0	1	0	0	0	0	0	0	0	0	0	0	0	0	0	0	0	0	0	0	0	0	0	0	0	0	0	0	0	0	0	0	0	0	0	0	0	0	0	0
hsa:59340	0	0	0	0	0	0	0	0	0	0	0	0	0	0	1	0	0	0	0	0	0	1	0	1	0	0	1	0	0	0	0	0	0	0	0	0	0	0	0	0	0	0	0	0	0	0	0	0	0
hsa:6010	0	0	0	0	0	0	0	0	0	0	0	0	0	0	0	0	0	0	0	0	0	0	0	0	0	0	0	0	0	0	0	0	0	0	0	0	0	0	0	0	0	0	0	0	0	0	0	0	0
hsa:64805	0	0	0	0	0	1	0	0	0	0	0	0	0	0	0	0	0	0	0	0	0	0	0	0	0	0	0	0	0	0	0	0	0	0	0	0	0	0	0	0	0	0	0	0	0	0	0	0	0
hsa:6751	0	0	0	0	0	0	0	0	0	0	0	0	0	0	0	0	0	0	0	0	0	0	0	0	0	0	0	0	0	0	0	0	0	0	0	0	0	0	0	0	0	0	0	0	0	1	0	0	0
hsa:6752	0	0	0	0	0	0	0	0	0	0	0	0	0	0	0	0	0	0	0	0	0	0	0	0	0	0	0	0	0	0	0	0	0	0	0	0	0	0	0	0	0	0	0	0	0	1	0	0	0
hsa:6753	0	0	0	0	0	0	0	0	0	0	0	0	0	0	0	0	0	0	0	0	0	0	0	0	0	0	0	0	0	0	0	0	0	0	0	0	0	0	0	0	0	0	0	0	0	0	0	0	0
hsa:6755	0	0	0	0	0	0	0	0	0	0	0	0	0	0	0	0	0	0	0	0	0	0	0	0	0	0	0	0	0	0	0	0	0	0	0	0	0	0	0	0	0	0	0	0	0	0	0	0	0
hsa:6915	0	0	0	0	0	0	0	0	0	0	0	0	0	0	0	0	0	0	0	0	0	0	0	0	0	0	0	0	1	0	0	0	0	0	0	0	0	0	0	0	0	0	0	0	0	0	0	0	0
hsa:7201	0	0	0	0	0	0	0	0	0	0	0	0	0	0	0	0	0	0	0	0	0	0	0	0	0	0	0	0	0	0	0	0	0	0	0	0	0	0	0	0	0	0	0	0	0	0	0	0	0
hsa:8843	0	0	0	0	0	0	0	0	0	0	0	0	0	0	0	0	0	0	0	0	0	0	0	0	0	0	0	0	0	0	0	0	0	0	0	0	0	0	0	0	0	0	0	0	0	0	0	0	0
hsa:886	0	0	0	0	0	0	0	0	0	0	0	0	0	0	0	0	0	0	0	0	0	0	0	0	0	0	0	0	0	0	0	0	0	0	0	0	0	0	0	0	0	0	0	0	0	0	0	0	0
hsa:887	0	0	0	0	0	0	0	0	0	0	0	0	0	0	0	0	0	0	0	0	0	0	0	0	0	0	0	0	0	0	0	0	0	0	0	0	0	0	0	0	0	0	0	0	0	0	0	0	0
hsa:9052	0	0	0	1	0	0	0	0	0	0	0	0	0	0	0	0	0	0	0	0	0	0	0	0	0	0	0	0	0	0	0	0	0	0	0	0	0	0	0	0	0	0	0	0	0	0	0	0	0
hsa:9283	0	0	0	0	0	0	0	0	0	0	0	0	0	0	0	0	0	0	0	0	0	0	0	0	0	0	0	0	0	0	0	0	0	0	0	0	0	0	0	0	0	0	0	0	0	0	0	0	0
hsa:9934	0	0	0	0	0	0	0	0	0	0	0	0	0	0	0	0	0	0	0	0	0	0	0	0	0	0	0	0	0	0	0	0	0	0	0	0	0	0	0	0	0	0	0	0	0	0	0	0	0
[truncated: 174 more columns]

## Sheet: drug similarity
1	0.352941	0.096774	0.107143	0.222222	0.096774	0.192308	0.2	0.129032	0.190476	0.096774	0.192308	0.083333	0	0.102564	0.166667	0.352941	0.114286	0.153846	0.108108	0.210526	0.142857	0.130435	0.217391	0.076923	0.103448	0.074074	0.166667	0.105263	0.142857	0.16129	0.157895	0.173913	0.148148	0.2	0.205882	0.3	0.086957	0.153846	0	0.111111	0.114286	0.148148	0.133333	0.071429	0.066667	0	0.16	0.148148	0.166667
0.352941	1	0.181818	0.090909	0.5	0.181818	0.125	0.166667	0.176471	0.2	0.181818	0.2	0.128205	0.060606	0.142857	0.32	0.473684	0.189189	0.206897	0.15	0.166667	0.193548	0.148148	0.178571	0.086957	0.233333	0.172414	0.181818	0.146341	0.184211	0.171429	0.125	0.185185	0.241379	0.206897	0.243243	0.148148	0.122449	0.25	0.078947	0.166667	0.157895	0.2	0.147059	0.129032	0.118421	0	0.259259	0.16129	0.176471
0.096774	0.181818	1	0.236842	0.151515	0.724138	0.119048	0.15	0.108696	0.025	0.851852	0.044444	0.078431	0.210526	0.113208	0.128205	0.147059	0.122449	0.095238	0.14	0.026316	0.043478	0.105263	0.1	0.116883	0.230769	0.071429	0.193548	0.09434	0.4	0.061224	0.055556	0.102564	0.093023	0.121951	0.1875	0.02439	0.064516	0.121951	0.529412	0.15	0.122449	0.205128	0.041667	0.15	0.142857	0.125	0.097561	0.044444	0.186047
0.107143	0.090909	0.236842	1	0.029412	0.236842	0.1	0.075	0.066667	0.027027	0.175	0.073171	0.083333	0.162162	0.056604	0.051282	0.090909	0.019608	0.04878	0.08	0.090909	0.097561	0.083333	0.051282	0.064103	0.216216	0.05	0.259259	0.078431	0.104167	0.113636	0.060606	0.052632	0.128205	0.02381	0.125	0.054054	0.105263	0.075	0.139535	0.131579	0.083333	0.128205	0.146341	0.131579	0.044944	0.159091	0.076923	0.1	0.116279
0.222222	0.5	0.151515	0.029412	1	0.151515	0.166667	0.259259	0.21875	0.26087	0.151515	0.25	0.131579	0.096774	0.175	0.333333	0.35	0.264706	0.307692	0.184211	0.173913	0.241379	0.2	0.230769	0.104478	0.285714	0.137931	0.041667	0.210526	0.257143	0.212121	0.181818	0.291667	0.296296	0.259259	0.184211	0.2	0.173913	0.307692	0.111111	0.214286	0.228571	0.296296	0.1875	0.172414	0.12	0.02439	0.32	0.206897	0.21875
0.096774	0.181818	0.724138	0.236842	0.151515	1	0.146341	0.179487	0.133333	0.051282	0.666667	0.068182	0.057692	0.243243	0.134615	0.128205	0.147059	0.122449	0.095238	0.163265	0.054054	0.066667	0.105263	0.1	0.131579	0.263158	0.071429	0.233333	0.115385	0.365854	0.106383	0.027027	0.102564	0.093023	0.121951	0.1875	0.02439	0.081967	0.121951	0.405405	0.179487	0.145833	0.205128	0.06383	0.15	0.142857	0.148936	0.097561	0.068182	0.214286
0.192308	0.125	0.119048	0.1	0.166667	0.146341	1	0.592593	0.2	0.151515	0.119048	0.222222	0.106383	0.34375	0.217391	0.205882	0.16129	0.130435	0.194444	0.255814	0.2	0.25	0.114286	0.242424	0.296875	0.25	0.05	0.096774	0.222222	0.358974	0.289474	0.129032	0.212121	0.257143	0.194444	0.148936	0.21875	0.26	0.228571	0.195122	0.131579	0.238095	0.257143	0.382353	0.102564	0.148148	0.186047	0.166667	0.294118	0.411765
0.2	0.166667	0.15	0.075	0.259259	0.179487	0.592593	1	0.236842	0.15625	0.15	0.228571	0.108696	0.448276	0.25	0.212121	0.25	0.159091	0.2	0.261905	0.206897	0.257143	0.117647	0.25	0.344262	0.222222	0.078947	0.137931	0.255814	0.368421	0.333333	0.096774	0.21875	0.264706	0.3125	0.152174	0.1875	0.265306	0.235294	0.2	0.135135	0.275	0.264706	0.277778	0.105263	0.164557	0.136364	0.171429	0.264706	0.46875
0.129032	0.176471	0.108696	0.066667	0.21875	0.133333	0.2	0.236842	1	0.2	0.108696	0.333333	0.142857	0.146341	0.463415	0.285714	0.290323	0.244444	0.382353	0.526316	0.25	0.441176	0.102564	0.363636	0.242857	0.25641	0.121951	0.1875	0.475	0.212766	0.394737	0.114286	0.294118	0.333333	0.424242	0.348837	0.30303	0.288462	0.236842	0.104167	0.146341	0.333333	0.2	0.085106	0.119048	0.197531	0.145833	0.210526	0.333333	0.3
0.190476	0.2	0.025	0.027027	0.26087	0.051282	0.151515	0.15625	0.2	1	0.025	0.310345	0.179487	0.027778	0.25	0.206897	0.2	0.277778	0.37037	0.263158	0.2	0.344828	0.137931	0.296296	0.132353	0.21875	0.090909	0	0.25641	0.119048	0.30303	0.26087	0.214286	0.310345	0.275862	0.297297	0.32	0.23913	0.321429	0.02381	0.15625	0.210526	0.1875	0.138889	0.121212	0.12987	0.071429	0.241379	0.266667	0.135135
0.096774	0.181818	0.851852	0.175	0.151515	0.666667	0.119048	0.15	0.108696	0.025	1	0.044444	0.078431	0.210526	0.113208	0.128205	0.147059	0.122449	0.095238	0.14	0.026316	0.043478	0.105263	0.1	0.116883	0.230769	0.071429	0.193548	0.09434	0.365854	0.061224	0.055556	0.102564	0.093023	0.121951	0.1875	0.02439	0.064516	0.121951	0.625	0.15	0.122449	0.205128	0.041667	0.15	0.156627	0.125	0.097561	0.044444	0.186047
0.192308	0.2	0.044444	0.073171	0.25	0.068182	0.222222	0.228571	0.333333	0.310345	0.044444	1	0.209302	0.075	0.333333	0.171429	0.2	0.3	0.433333	0.317073	0.241379	0.451613	0.114286	0.366667	0.185714	0.184211	0.076923	0.030303	0.341463	0.177778	0.361111	0.206897	0.176471	0.375	0.34375	0.317073	0.344828	0.285714	0.264706	0.042553	0.131579	0.3	0.157895	0.146341	0.102564	0.1625	0.0625	0.235294	0.375	0.2
0.083333	0.128205	0.078431	0.083333	0.131579	0.057692	0.106383	0.108696	0.142857	0.179487	0.078431	0.209302	1	0.108696	0.230769	0.166667	0.128205	0.22449	0.275	0.215686	0.1	0.152174	0.205128	0.195122	0.123457	0.232558	0.111111	0.05	0.166667	0.12963	0.163265	0.433333	0.170732	0.238095	0.159091	0.24	0.205128	0.20339	0.214286	0.117647	0.159091	0.276596	0.181818	0.145833	0.186047	0.174419	0.072727	0.25	0.181818	0.12
0	0.060606	0.210526	0.162162	0.096774	0.243243	0.34375	0.448276	0.146341	0.027778	0.210526	0.075	0.108696	1	0.195652	0.142857	0.129032	0.085106	0.135135	0.204545	0.09375	0.128205	0.151515	0.111111	0.242424	0.294118	0.078947	0.178571	0.173913	0.3	0.230769	0.0625	0.114286	0.194444	0.105263	0.12766	0.055556	0.192308	0.166667	0.333333	0.166667	0.214286	0.264706	0.179487	0.166667	0.108434	0.190476	0.171429	0.131579	0.305556
0.102564	0.142857	0.113208	0.056604	0.175	0.134615	0.217391	0.25	0.463415	0.25	0.113208	0.333333	0.230769	0.195652	1	0.232558	0.2	0.361702	0.410256	0.466667	0.2	0.461538	0.159091	0.325	0.357143	0.23913	0.125	0.15	0.456522	0.203704	0.386364	0.146341	0.238095	0.333333	0.309524	0.32	0.214286	0.415094	0.27907	0.109091	0.195652	0.422222	0.217391	0.134615	0.170213	0.26506	0.086207	0.285714	0.4	0.276596
0.166667	0.32	0.128205	0.051282	0.333333	0.128205	0.205882	0.212121	0.285714	0.206897	0.128205	0.171429	0.166667	0.142857	0.232558	1	0.32	0.324324	0.290323	0.342105	0.137931	0.166667	0.241379	0.310345	0.142857	0.272727	0.181818	0.068966	0.268293	0.351351	0.15	0.142857	0.37037	0.28125	0.333333	0.342105	0.285714	0.2	0.290323	0.15	0.290323	0.166667	0.413793	0.157895	0.25	0.168831	0.090909	0.344828	0.171429	0.285714
0.352941	0.473684	0.147059	0.090909	0.35	0.147059	0.16129	0.25	0.290323	0.2	0.147059	0.2	0.128205	0.129032	0.2	0.32	1	0.189189	0.296296	0.243243	0.217391	0.193548	0.148148	0.222222	0.119403	0.193548	0.172414	0.3	0.175	0.216216	0.205882	0.08	0.333333	0.241379	0.25	0.277778	0.148148	0.122449	0.206897	0.051282	0.166667	0.189189	0.2	0.114286	0.129032	0.103896	0	0.214286	0.125	0.212121
0.114286	0.189189	0.122449	0.019608	0.264706	0.122449	0.130435	0.159091	0.244444	0.277778	0.122449	0.268293	0.22449	0.085106	0.361702	0.324324	0.189189	1	0.378378	0.291667	0.157895	0.292683	0.175	0.4	0.263889	0.204545	0.111111	0.05	0.26	0.244898	0.23913	0.162162	0.2	0.444444	0.307692	0.319149	0.236842	0.365385	0.243902	0.117647	0.186047	0.2	0.333333	0.145833	0.159091	0.278481	0.017241	0.282051	0.3	0.217391
0.153846	0.206897	0.095238	0.04878	0.307692	0.095238	0.194444	0.2	0.382353	0.37037	0.095238	0.433333	0.275	0.135135	0.410256	0.290323	0.296296	0.378378	1	0.394737	0.206897	0.466667	0.1875	0.538462	0.205882	0.294118	0.138889	0.064516	0.35	0.238095	0.371429	0.214286	0.258065	0.592593	0.4	0.394737	0.357143	0.319149	0.4	0.116279	0.272727	0.275	0.264706	0.210526	0.235294	0.194805	0.041667	0.413793	0.34375	0.236842
0.108108	0.15	0.14	0.08	0.184211	0.163265	0.255814	0.261905	0.526316	0.263158	0.14	0.317073	0.215686	0.204545	0.466667	0.342105	0.243243	0.291667	0.394737	1	0.210526	0.375	0.139535	0.342105	0.24	0.309524	0.130435	0.128205	0.477273	0.26	0.311111	0.153846	0.315789	0.35	0.292683	0.306122	0.324324	0.351852	0.292683	0.156863	0.204545	0.347826	0.285714	0.14	0.177778	0.256098	0.150943	0.268293	0.317073	0.288889
0.210526	0.166667	0.026316	0.090909	0.173913	0.054054	0.2	0.206897	0.25	0.2	0.026316	0.241379	0.1	0.09375	0.2	0.137931	0.217391	0.157895	0.206897	0.210526	1	0.275862	0.107143	0.137931	0.102941	0.233333	0.133333	0.083333	0.175	0.125	0.242424	0.173913	0.142857	0.2	0.129032	0.121951	0.148148	0.145833	0.25	0.025	0.129032	0.189189	0.2	0.21875	0.129032	0.089744	0.075	0.172414	0.241379	0.176471
0.142857	0.193548	0.043478	0.097561	0.241379	0.066667	0.25	0.257143	0.441176	0.344828	0.043478	0.451613	0.152174	0.128205	0.461538	0.166667	0.193548	0.292683	0.466667	0.375	0.275862	1	0.111111	0.3125	0.235294	0.210526	0.075	0.129032	0.4	0.148936	0.5625	0.16129	0.171429	0.363636	0.294118	0.25	0.290323	0.333333	0.257143	0.041667	0.128205	0.394737	0.184211	0.170732	0.1	0.160494	0.130435	0.228571	0.607143	0.25641
0.130435	0.148148	0.105263	0.083333	0.2	0.105263	0.114286	0.117647	0.102564	0.137931	0.105263	0.114286	0.205128	0.151515	0.159091	0.241379	0.148148	0.175	0.1875	0.139535	0.107143	0.111111	1	0.2	0.114286	0.176471	0.275862	0.074074	0.162791	0.170732	0.128205	0.25	0.25	0.147059	0.1875	0.166667	0.133333	0.137255	0.266667	0.128205	0.407407	0.146341	0.181818	0.135135	0.407407	0.1	0.069767	0.321429	0.147059	0.162162
0.217391	0.178571	0.1	0.051282	0.230769	0.1	0.242424	0.25	0.363636	0.296296	0.1	0.366667	0.195122	0.111111	0.325	0.310345	0.222222	0.4	0.538462	0.342105	0.137931	0.3125	0.2	1	0.25	0.235294	0.147059	0.033333	0.3	0.25	0.243243	0.185185	0.321429	0.518519	0.481481	0.378378	0.5	0.25	0.333333	0.095238	0.212121	0.195122	0.242424	0.189189	0.212121	0.216216	0.043478	0.344828	0.28125	0.25
0.076923	0.086957	0.116883	0.064103	0.104478	0.131579	0.296875	0.344262	0.242857	0.132353	0.116883	0.185714	0.123457	0.242424	0.357143	0.142857	0.119403	0.263889	0.205882	0.24	0.102941	0.235294	0.114286	0.25	1	0.166667	0.109589	0.089552	0.253333	0.226667	0.257143	0.088235	0.161765	0.220588	0.223881	0.192308	0.181818	0.342105	0.15493	0.157895	0.108108	0.246575	0.152778	0.194444	0.093333	0.281553	0.153846	0.173913	0.185714	0.26087
0.103448	0.233333	0.230769	0.216216	0.285714	0.263158	0.25	0.222222	0.25641	0.21875	0.230769	0.184211	0.232558	0.294118	0.23913	0.272727	0.193548	0.204545	0.294118	0.309524	0.233333	0.210526	0.176471	0.235294	0.166667	1	0.131579	0.129032	0.244444	0.285714	0.25	0.2	0.242424	0.323529	0.222222	0.25	0.176471	0.230769	0.333333	0.282051	0.257143	0.292683	0.363636	0.263158	0.257143	0.160494	0.181818	0.34375	0.216216	0.289474
0.074074	0.172414	0.071429	0.05	0.137931	0.071429	0.05	0.078947	0.121951	0.090909	0.071429	0.076923	0.111111	0.078947	0.125	0.181818	0.172414	0.111111	0.138889	0.130435	0.133333	0.075	0.275862	0.147059	0.109589	0.131579	1	0.066667	0.177778	0.108696	0.093023	0.064516	0.225806	0.105263	0.138889	0.130435	0.088235	0.12963	0.171429	0.068182	0.28125	0.111111	0.105263	0.071429	0.322581	0.096386	0.020833	0.25	0.105263	0.095238
0.166667	0.181818	0.193548	0.259259	0.041667	0.233333	0.096774	0.137931	0.1875	0	0.193548	0.030303	0.05	0.178571	0.15	0.068966	0.3	0.05	0.064516	0.128205	0.083333	0.129032	0.074074	0.033333	0.089552	0.129032	0.066667	1	0.153846	0.075	0.147059	0	0.071429	0.133333	0.064516	0.1	0	0.104167	0.1	0.083333	0.064516	0.135135	0.133333	0	0.064516	0.064103	0.138889	0.066667	0.133333	0.225806
0.105263	0.146341	0.09434	0.078431	0.210526	0.115385	0.222222	0.255814	0.475	0.25641	0.09434	0.341463	0.166667	0.173913	0.456522	0.268293	0.175	0.285714	0.35	0.413043	0.175	0.4	0.162791	0.3	0.253333	0.244444	0.177778	0.153846	1	0.185185	0.333333	0.121951	0.416667	0.27907	0.317073	0.3	0.282051	0.423077	0.285714	0.090909	0.2	0.369565	0.195652	0.115385	0.173913	0.238095	0.127273	0.358974	0.309524	0.282609
0.142857	0.184211	0.4	0.104167	0.257143	0.365854	0.358974	0.368421	0.212766	0.119048	0.365854	0.177778	0.12963	0.3	0.203704	0.351351	0.216216	0.244898	0.238095	0.26	0.125	0.148936	0.170732	0.25	0.226667	0.285714	0.108696	0.075	0.185185	1	0.183673	0.1	0.225	0.261905	0.209302	0.235294	0.170732	0.2	0.238095	0.487179	0.238095	0.173077	0.358974	0.244444	0.209302	0.228916	0.111111	0.214286	0.177778	0.357143
0.16129	0.171429	0.061224	0.113636	0.212121	0.106383	0.289474	0.333333	0.394737	0.30303	0.061224	0.361111	0.163265	0.230769	0.386364	0.15	0.205882	0.23913	0.371429	0.311111	0.242424	0.5625	0.128205	0.243243	0.257143	0.25	0.093023	0.147059	0.333333	0.183673	1	0.176471	0.184211	0.361111	0.263158	0.255319	0.294118	0.36	0.230769	0.102041	0.116279	0.390244	0.166667	0.238095	0.090909	0.139535	0.166667	0.205128	0.441176	0.292683
0.157895	0.125	0.055556	0.060606	0.181818	0.027027	0.129032	0.096774	0.114286	0.26087	0.055556	0.206897	0.433333	0.0625	0.146341	0.142857	0.08	0.162162	0.214286	0.153846	0.173913	0.16129	0.25	0.185185	0.088235	0.2	0.064516	0	0.121951	0.1	0.176471	1	0.148148	0.206897	0.172414	0.184211	0.25	0.148936	0.259259	0.081081	0.133333	0.194444	0.206897	0.151515	0.133333	0.105263	0.076923	0.269231	0.25	0.114286
0.173913	0.185185	0.102564	0.052632	0.291667	0.102564	0.212121	0.21875	0.294118	0.214286	0.102564	0.176471	0.170732	0.114286	0.238095	0.37037	0.333333	0.2	0.258065	0.315789	0.142857	0.171429	0.25	0.321429	0.161765	0.242424	0.225806	0.071429	0.416667	0.225	0.184211	0.148148	1	0.212121	0.344828	0.282051	0.296296	0.282609	0.258065	0.125	0.3	0.2	0.212121	0.162162	0.258065	0.155844	0.093023	0.407407	0.176471	0.257143
0.148148	0.241379	0.093023	0.128205	0.296296	0.093023	0.257143	0.264706	0.333333	0.310345	0.093023	0.375	0.238095	0.194444	0.333333	0.28125	0.241379	0.444444	0.592593	0.35	0.2	0.363636	0.147059	0.518519	0.220588	0.323529	0.105263	0.133333	0.27907	0.261905	0.361111	0.206897	0.212121	1	0.387097	0.35	0.344828	0.3125	0.387097	0.139535	0.264706	0.209302	0.333333	0.236842	0.228571	0.207792	0.108696	0.4	0.333333	0.297297
0.2	0.206897	0.121951	0.02381	0.259259	0.121951	0.194444	0.3125	0.424242	0.275862	0.121951	0.34375	0.159091	0.105263	0.309524	0.333333	0.25	0.307692	0.4	0.292683	0.129032	0.294118	0.1875	0.481481	0.223881	0.222222	0.138889	0.064516	0.317073	0.209302	0.263158	0.172414	0.344828	0.387097	1	0.432432	0.461538	0.265306	0.272727	0.090909	0.2	0.186047	0.194444	0.15	0.2	0.226667	0.06383	0.28125	0.264706	0.305556
0.205882	0.243243	0.1875	0.125	0.184211	0.1875	0.148936	0.152174	0.348837	0.297297	0.1875	0.317073	0.24	0.12766	0.32	0.342105	0.277778	0.319149	0.394737	0.306122	0.121951	0.25	0.166667	0.378378	0.207792	0.25	0.130435	0.1	0.3	0.235294	0.255319	0.184211	0.282051	0.35	0.432432	1	0.324324	0.280702	0.261905	0.134615	0.232558	0.24	0.227273	0.1875	0.204545	0.240964	0.070175	0.3	0.255814	0.208333
0.3	0.148148	0.02439	0.054054	0.2	0.02439	0.21875	0.1875	0.30303	0.32	0.02439	0.344828	0.205128	0.055556	0.214286	0.285714	0.148148	0.236842	0.357143	0.324324	0.148148	0.290323	0.133333	0.5	0.181818	0.176471	0.088235	0	0.282051	0.170732	0.294118	0.25	0.296296	0.344828	0.461538	0.324324	1	0.26087	0.266667	0.047619	0.151515	0.205128	0.21875	0.166667	0.151515	0.173333	0.095238	0.275862	0.3	0.194444
0.086957	0.122449	0.064516	0.105263	0.173913	0.081967	0.235294	0.265306	0.288462	0.23913	0.064516	0.285714	0.20339	0.192308	0.415094	0.2	0.122449	0.365385	0.319149	0.351852	0.145833	0.333333	0.137255	0.25	0.342105	0.230769	0.12963	0.104167	0.423077	0.2	0.36	0.148936	0.282609	0.3125	0.265306	0.280702	0.26087	1	0.265306	0.133333	0.169811	0.267857	0.235294	0.2	0.148148	0.272727	0.111111	0.326087	0.3125	0.288462
0.153846	0.25	0.121951	0.075	0.307692	0.121951	0.228571	0.235294	0.236842	0.321429	0.121951	0.264706	0.214286	0.166667	0.27907	0.290323	0.206897	0.243902	0.4	0.292683	0.25	0.257143	0.266667	0.333333	0.15493	0.333333	0.171429	0.1	0.285714	0.238095	0.230769	0.259259	0.258065	0.387097	0.272727	0.261905	0.266667	0.265306	1	0.142857	0.272727	0.275	0.264706	0.210526	0.235294	0.179487	0.136364	0.576923	0.264706	0.236842
0	0.078947	0.529412	0.139535	0.111111	0.405405	0.195122	0.2	0.104167	0.02381	0.625	0.042553	0.117647	0.333333	0.109091	0.15	0.051282	0.117647	0.116279	0.156863	0.025	0.041667	0.128205	0.095238	0.157895	0.282051	0.068182	0.083333	0.090909	0.487179	0.102041	0.081081	0.125	0.139535	0.090909	0.134615	0.047619	0.133333	0.142857	1	0.2	0.117647	0.25641	0.155556	0.2	0.180723	0.166667	0.146341	0.065217	0.232558
0.111111	0.166667	0.15	0.131579	0.214286	0.179487	0.131579	0.135135	0.146341	0.15625	0.15	0.131579	0.159091	0.166667	0.195652	0.290323	0.166667	0.186047	0.272727	0.204545	0.129032	0.128205	0.407407	0.212121	0.108108	0.257143	0.28125	0.064516	0.2	0.238095	0.116279	0.133333	0.3	0.264706	0.2	0.232558	0.151515	0.169811	0.272727	0.2	1	0.159091	0.264706	0.243243	0.826087	0.121951	0.086957	0.366667	0.131579	0.175
0.114286	0.157895	0.122449	0.083333	0.228571	0.145833	0.238095	0.275	0.365854	0.210526	0.122449	0.3	0.276596	0.214286	0.422222	0.166667	0.189189	0.2	0.275	0.347826	0.189189	0.394737	0.146341	0.195122	0.246575	0.292683	0.111111	0.135135	0.369565	0.173077	0.390244	0.194444	0.2	0.209302	0.186047	0.24	0.205128	0.267857	0.275	0.117647	0.159091	1	0.209302	0.122449	0.133333	0.147727	0.18	0.219512	0.368421	0.244444
0.148148	0.2	0.205128	0.128205	0.296296	0.205128	0.257143	0.264706	0.2	0.1875	0.205128	0.157895	0.181818	0.264706	0.217391	0.413793	0.2	0.333333	0.264706	0.285714	0.2	0.184211	0.181818	0.242424	0.152778	0.363636	0.105263	0.133333	0.195652	0.358974	0.166667	0.206897	0.212121	0.333333	0.194444	0.227273	0.21875	0.235294	0.264706	0.25641	0.264706	0.209302	1	0.205128	0.228571	0.1625	0.133333	0.3125	0.222222	0.333333
0.133333	0.147059	0.041667	0.146341	0.1875	0.06383	0.382353	0.277778	0.085106	0.138889	0.041667	0.146341	0.145833	0.179487	0.134615	0.157895	0.114286	0.145833	0.210526	0.14	0.21875	0.170732	0.135135	0.189189	0.194444	0.263158	0.071429	0	0.115385	0.244444	0.238095	0.151515	0.162162	0.236842	0.15	0.1875	0.166667	0.2	0.210526	0.155556	0.243243	0.122449	0.205128	1	0.210526	0.103448	0.102041	0.216216	0.205128	0.275
0.071429	0.129032	0.15	0.131579	0.172414	0.15	0.102564	0.105263	0.119048	0.121212	0.15	0.102564	0.186047	0.166667	0.170213	0.25	0.129032	0.159091	0.235294	0.177778	0.129032	0.1	0.407407	0.212121	0.093333	0.257143	0.322581	0.064516	0.173913	0.209302	0.090909	0.133333	0.258065	0.228571	0.2	0.204545	0.151515	0.148148	0.235294	0.2	0.826087	0.133333	0.228571	0.210526	1	0.121951	0.086957	0.322581	0.162162	0.146341
0.066667	0.118421	0.142857	0.044944	0.12	0.142857	0.148148	0.164557	0.197531	0.12987	0.156627	0.1625	0.174419	0.108434	0.26506	0.168831	0.103896	0.278481	0.179487	0.240964	0.089744	0.160494	0.1	0.184211	0.281553	0.160494	0.096386	0.064103	0.238095	0.214286	0.139535	0.105263	0.155844	0.207792	0.210526	0.240964	0.173333	0.272727	0.179487	0.180723	0.121951	0.147727	0.148148	0.103448	0.121951	0.797468	0.123596	0.166667	0.177215	0.168675
0	0	0.125	0.159091	0.02439	0.148936	0.186047	0.136364	0.145833	0.071429	0.125	0.0625	0.072727	0.190476	0.086207	0.090909	0	0.017241	0.041667	0.150943	0.075	0.130435	0.069767	0.043478	0.153846	0.181818	0.020833	0.138889	0.127273	0.111111	0.166667	0.076923	0.093023	0.108696	0.06383	0.070175	0.095238	0.111111	0.136364	0.166667	0.086957	0.18	0.133333	0.102041	0.086957	0.123596	1	0.065217	0.133333	0.122449
0.16	0.259259	0.097561	0.076923	0.32	0.097561	0.166667	0.171429	0.210526	0.241379	0.097561	0.235294	0.25	0.171429	0.285714	0.344828	0.214286	0.282051	0.413793	0.268293	0.172414	0.228571	0.321429	0.344828	0.173913	0.34375	0.25	0.066667	0.358974	0.214286	0.205128	0.269231	0.407407	0.4	0.28125	0.3	0.275862	0.326087	0.576923	0.146341	0.366667	0.219512	0.3125	0.216216	0.322581	0.166667	0.065217	1	0.235294	0.210526
0.148148	0.16129	0.044444	0.1	0.206897	0.068182	0.294118	0.264706	0.333333	0.266667	0.044444	0.375	0.181818	0.131579	0.4	0.171429	0.125	0.3	0.34375	0.317073	0.241379	0.607143	0.147059	0.28125	0.185714	0.216216	0.105263	0.133333	0.309524	0.177778	0.441176	0.25	0.176471	0.333333	0.264706	0.255814	0.3	0.3125	0.264706	0.065217	0.131579	0.368421	0.222222	0.205128	0.162162	0.177215	0.133333	0.235294	1	0.297297
0.166667	0.176471	0.186047	0.116279	0.21875	0.214286	0.411765	0.46875	0.3	0.135135	0.186047	0.2	0.12	0.305556	0.276596	0.285714	0.212121	0.217391	0.236842	0.288889	0.176471	0.25641	0.162162	0.25	0.26087	0.289474	0.095238	0.225806	0.282609	0.357143	0.292683	0.114286	0.257143	0.297297	0.305556	0.208333	0.194444	0.288462	0.236842	0.232558	0.175	0.244444	0.333333	0.275	0.146341	0.168675	0.122449	0.210526	0.297297	1
0.153846	0.25	0.069767	0.075	0.307692	0.069767	0.194444	0.2	0.305556	0.321429	0.069767	0.387097	0.243902	0.135135	0.309524	0.25	0.25	0.416667	0.68	0.325	0.206897	0.419355	0.151515	0.538462	0.223881	0.222222	0.108108	0.03125	0.285714	0.209302	0.333333	0.214286	0.21875	0.72	0.4	0.358974	0.357143	0.291667	0.3125	0.090909	0.235294	0.243902	0.264706	0.243243	0.235294	0.194805	0.06383	0.366667	0.34375	0.205128
0.208333	0.259259	0.097561	0.05	0.375	0.097561	0.2	0.205882	0.314286	0.285714	0.097561	0.3125	0.190476	0.171429	0.285714	0.56	0.307692	0.428571	0.464286	0.3	0.214286	0.30303	0.193548	0.444444	0.191176	0.264706	0.111111	0.066667	0.261905	0.307692	0.236842	0.222222	0.310345	0.448276	0.322581	0.368421	0.321429	0.244898	0.366667	0.119048	0.242424	0.219512	0.5	0.216216	0.205882	0.166667	0.042553	0.37931	0.272727	0.277778
0.133333	0.181818	0.111111	0.068182	0.266667	0.136364	0.236842	0.277778	0.545455	0.322581	0.111111	0.424242	0.222222	0.179487	0.552632	0.222222	0.258065	0.341463	0.703704	0.461538	0.258065	0.714286	0.166667	0.375	0.228571	0.297297	0.125	0.193548	0.45	0.217391	0.529412	0.1875	0.228571	0.424242	0.314286	0.325581	0.272727	0.346939	0.314286	0.106383	0.179487	0.410256	0.236842	0.162791	0.15	0.185185	0.102041	0.285714	0.566667	0.307692
0.16	0.259259	0.071429	0.076923	0.32	0.071429	0.2	0.205882	0.277778	0.333333	0.071429	0.354839	0.25	0.108108	0.285714	0.258065	0.214286	0.428571	0.64	0.3	0.172414	0.387097	0.15625	0.56	0.208955	0.228571	0.111111	0.032258	0.261905	0.214286	0.305556	0.222222	0.225806	0.75	0.413793	0.368421	0.37037	0.297872	0.322581	0.093023	0.242424	0.219512	0.272727	0.25	0.242424	0.197368	0.065217	0.37931	0.354839	0.210526
0.153846	0.206897	0.179487	0.228571	0.307692	0.210526	0.34375	0.3125	0.27027	0.193548	0.15	0.228571	0.186047	0.272727	0.222222	0.25	0.206897	0.186047	0.272727	0.292683	0.206897	0.294118	0.1875	0.212121	0.188406	0.419355	0.138889	0.137931	0.255814	0.3	0.263158	0.172414	0.21875	0.30303	0.2	0.204545	0.1875	0.265306	0.3125	0.230769	0.235294	0.275	0.387097	0.243243	0.2	0.135802	0.190476	0.322581	0.30303	0.342857
0	0.071429	0.205882	0.117647	0.115385	0.138889	0.055556	0.088235	0.076923	0.032258	0.205882	0.027027	0.179487	0.193548	0.086957	0.129032	0.071429	0.095238	0.121212	0.090909	0.071429	0.054054	0.137931	0.129032	0.069444	0.147059	0.090909	0.076923	0.065217	0.093023	0.04878	0.16	0.133333	0.151515	0.121212	0.116279	0.064516	0.075472	0.15625	0.194444	0.121212	0.095238	0.117647	0.108108	0.121212	0.144737	0.153846	0.125	0.055556	0.105263
0.125	0.171429	0.130435	0.042553	0.25	0.155556	0.195122	0.263158	0.558824	0.264706	0.130435	0.361111	0.1875	0.2	0.487805	0.210526	0.242424	0.357143	0.6	0.404762	0.242424	0.612903	0.128205	0.314286	0.239437	0.282051	0.119048	0.181818	0.395349	0.234043	0.5	0.142857	0.216216	0.361111	0.333333	0.282609	0.222222	0.307692	0.263158	0.125	0.142857	0.357143	0.225	0.130435	0.116279	0.209877	0.076923	0.236842	0.484848	0.325
0.166667	0.176471	0.085106	0.116279	0.258065	0.085106	0.230769	0.236842	0.368421	0.272727	0.085106	0.371429	0.166667	0.119048	0.304348	0.25	0.212121	0.244444	0.342857	0.318182	0.290323	0.361111	0.131579	0.40625	0.279412	0.25641	0.179487	0.085714	0.404762	0.212766	0.292683	0.181818	0.333333	0.371429	0.342857	0.26087	0.34375	0.313725	0.305556	0.104167	0.146341	0.244444	0.230769	0.186047	0.146341	0.197531	0.1	0.314286	0.297297	0.268293
0.173913	0.28	0.102564	0.052632	0.409091	0.102564	0.176471	0.21875	0.257143	0.259259	0.102564	0.212121	0.2	0.147059	0.209302	0.541667	0.28	0.411765	0.344828	0.25	0.230769	0.205882	0.25	0.37037	0.144928	0.28125	0.117647	0.071429	0.214286	0.289474	0.184211	0.24	0.285714	0.37931	0.3	0.315789	0.296296	0.204082	0.392857	0.125	0.258065	0.2	0.538462	0.194444	0.21875	0.155844	0.044444	0.407407	0.25	0.257143
0.2	0.208333	0.052632	0.088235	0.272727	0.052632	0.193548	0.2	0.205882	0.347826	0.052632	0.275862	0.25	0.090909	0.225	0.214286	0.208333	0.285714	0.384615	0.236842	0.26087	0.310345	0.230769	0.416667	0.134328	0.225806	0.09375	0	0.2	0.179487	0.272727	0.4	0.222222	0.37037	0.333333	0.27027	0.391304	0.244444	0.285714	0.076923	0.2	0.184211	0.233333	0.212121	0.2	0.116883	0.073171	0.346154	0.321429	0.171429
0.135135	0.119048	0.09434	0.078431	0.15	0.074074	0.170213	0.173913	0.282609	0.225	0.09434	0.375	0.431818	0.125	0.367347	0.209302	0.175	0.369565	0.421053	0.25	0.119048	0.217391	0.136364	0.575758	0.253333	0.217391	0.104167	0.022727	0.245283	0.185185	0.2	0.314286	0.214286	0.341463	0.35	0.354167	0.315789	0.275862	0.227273	0.111111	0.173913	0.285714	0.195652	0.183673	0.173913	0.223529	0.068966	0.261905	0.25	0.204082
0.128205	0.166667	0.176471	0.096154	0.263158	0.2	0.266667	0.272727	0.487805	0.214286	0.176471	0.295455	0.203704	0.217391	0.5	0.255814	0.195122	0.382979	0.365854	0.425532	0.139535	0.380952	0.130435	0.421053	0.391304	0.318182	0.1	0.146341	0.36	0.294118	0.319149	0.142857	0.204545	0.425	0.302326	0.34	0.3	0.381818	0.272727	0.192308	0.191489	0.326531	0.357143	0.176471	0.166667	0.325	0.122807	0.25	0.325581	0.386364
0.2	0.236842	0.115385	0.078431	0.179487	0.115385	0.122449	0.148936	0.204082	0.289474	0.115385	0.309524	0.235294	0.058824	0.367347	0.181818	0.27027	0.369565	0.285714	0.226415	0.146341	0.244444	0.111111	0.3	0.220779	0.166667	0.104167	0.097561	0.178571	0.122807	0.25	0.179487	0.186047	0.309524	0.317073	0.547619	0.219512	0.298246	0.2	0.052632	0.125	0.26	0.170213	0.137255	0.125	0.195402	0.016393	0.204545	0.25	0.156863
0.108108	0.15	0.14	0.102041	0.184211	0.14	0.227273	0.232558	0.414634	0.297297	0.14	0.384615	0.215686	0.152174	0.404255	0.214286	0.210526	0.291667	0.325	0.306122	0.210526	0.410256	0.166667	0.342105	0.223684	0.27907	0.130435	0.157895	0.354167	0.188679	0.340909	0.153846	0.25	0.35	0.358974	0.52381	0.225	0.280702	0.261905	0.134615	0.177778	0.347826	0.2	0.163265	0.152174	0.22619	0.12963	0.238095	0.317073	0.288889
0	0.086957	0.090909	0.1	0.090909	0.090909	0.178571	0.185185	0.088235	0.038462	0.090909	0.064516	0.138889	0.333333	0.097561	0.153846	0.136364	0.078947	0.185185	0.162162	0.041667	0.0625	0.166667	0.153846	0.107692	0.172414	0.107143	0.095238	0.1	0.166667	0.151515	0.090909	0.16	0.137931	0.066667	0.131579	0.076923	0.155556	0.142857	0.225806	0.185185	0.108108	0.137931	0.2	0.185185	0.064935	0.081081	0.192308	0.064516	0.193548
0.2	0.16	0.142857	0.088235	0.217391	0.111111	0.275862	0.241379	0.138889	0.24	0.142857	0.15625	0.153846	0.16129	0.166667	0.214286	0.16	0.125	0.16129	0.205128	0.16	0.151515	0.185185	0.172414	0.117647	0.266667	0.129032	0.125	0.170732	0.210526	0.166667	0.217391	0.222222	0.193548	0.2	0.175	0.230769	0.166667	0.44	0.135135	0.16129	0.184211	0.275862	0.176471	0.16129	0.102564	0.157895	0.206897	0.193548	0.242424
0.15	0.12	0.054054	0.090909	0.173913	0.026316	0.125	0.09375	0.111111	0.25	0.054054	0.2	0.419355	0.09375	0.142857	0.137931	0.076923	0.157895	0.25	0.15	0.166667	0.15625	0.192308	0.178571	0.086957	0.233333	0.0625	0	0.119048	0.097561	0.171429	0.8	0.142857	0.241379	0.166667	0.210526	0.24	0.170213	0.206897	0.108108	0.166667	0.189189	0.241379	0.181818	0.166667	0.089744	0.102564	0.259259	0.241379	0.111111
0.178571	0.151515	0.113636	0.121951	0.193548	0.139535	0.483871	0.551724	0.282051	0.142857	0.113636	0.243243	0.102041	0.323529	0.234043	0.228571	0.1875	0.148936	0.216216	0.272727	0.225806	0.305556	0.108108	0.228571	0.287879	0.236842	0.047619	0.125	0.23913	0.341463	0.378378	0.121212	0.2	0.243243	0.216216	0.142857	0.205882	0.27451	0.216216	0.186047	0.125	0.35	0.277778	0.289474	0.097561	0.158537	0.177778	0.157895	0.314286	0.515152
0	0.05	0.032258	0	0.052632	0.032258	0	0.037037	0.064516	0	0.032258	0.035714	0	0.076923	0.025	0.04	0.105263	0.027778	0.037037	0.054054	0.105263	0.034483	0	0.04	0.030303	0	0	0	0.025641	0.027027	0.030303	0	0	0.035714	0.037037	0.026316	0.043478	0	0	0.030303	0	0.027778	0.035714	0	0	0.012987	0	0	0	0.03125
0.083333	0.148148	0.135135	0.083333	0.2	0.166667	0.181818	0.225806	0.228571	0.137931	0.135135	0.181818	0.146341	0.266667	0.214286	0.16129	0.148148	0.146341	0.225806	0.25641	0.192308	0.176471	0.214286	0.125	0.114286	0.25	0.193548	0.208333	0.190476	0.116279	0.257143	0.153846	0.166667	0.21875	0.117647	0.139535	0.096774	0.137255	0.225806	0.128205	0.1875	0.236842	0.21875	0.105263	0.266667	0.08642	0.095238	0.15625	0.181818	0.194444
0.102564	0.170732	0.134615	0.037037	0.175	0.134615	0.191489	0.25	0.578947	0.219512	0.134615	0.333333	0.230769	0.170213	0.658537	0.177778	0.230769	0.391304	0.375	0.434783	0.2	0.425	0.108696	0.325	0.357143	0.212766	0.102041	0.15	0.367347	0.181818	0.386364	0.146341	0.209302	0.302326	0.309524	0.294118	0.186047	0.388889	0.222222	0.109091	0.122449	0.391304	0.191489	0.113208	0.1	0.296296	0.086207	0.173913	0.4	0.25
0.208333	0.172414	0.071429	0.076923	0.222222	0.097561	0.3125	0.322581	0.314286	0.333333	0.071429	0.354839	0.190476	0.138889	0.35	0.147059	0.133333	0.315789	0.366667	0.3	0.259259	0.535714	0.15625	0.344828	0.208955	0.228571	0.081081	0.103448	0.325	0.186047	0.46875	0.222222	0.151515	0.448276	0.322581	0.268293	0.37037	0.297872	0.28125	0.068182	0.108108	0.315789	0.235294	0.216216	0.108108	0.181818	0.139535	0.212121	0.555556	0.277778
0.181818	0.24	0.135135	0.114286	0.25	0.076923	0.258065	0.266667	0.264706	0.222222	0.135135	0.21875	0.175	0.117647	0.214286	0.241379	0.291667	0.119048	0.1875	0.225	0.24	0.25	0.096774	0.2	0.130435	0.25	0.121212	0.208333	0.219512	0.170732	0.257143	0.2	0.296296	0.21875	0.225806	0.195122	0.172414	0.16	0.266667	0.128205	0.151515	0.236842	0.181818	0.166667	0.117647	0.157895	0.15	0.193548	0.21875	0.264706
0.142857	0.233333	0.2	0.097561	0.285714	0.2	0.25	0.257143	0.324324	0.181818	0.2	0.216216	0.152174	0.222222	0.325581	0.615385	0.275862	0.325	0.257143	0.375	0.193548	0.210526	0.212121	0.3125	0.183099	0.352941	0.131579	0.129032	0.302326	0.421053	0.190476	0.125	0.322581	0.285714	0.257143	0.27907	0.176471	0.230769	0.333333	0.219512	0.257143	0.232558	0.451613	0.170732	0.222222	0.175	0.083333	0.30303	0.216216	0.324324
0.117647	0.192308	0.196721	0.129032	0.173077	0.177419	0.111111	0.112903	0.254237	0.163636	0.216667	0.186441	0.164179	0.112903	0.242424	0.313725	0.192308	0.278689	0.232143	0.269841	0.068966	0.163934	0.12069	0.240741	0.172043	0.183333	0.096774	0.071429	0.246154	0.295082	0.136364	0.109091	0.178571	0.22807	0.210526	0.333333	0.181818	0.202703	0.210526	0.190476	0.169492	0.147059	0.25	0.123077	0.169492	0.239583	0.040541	0.236364	0.129032	0.15625
0.2	0.16	0.025641	0.088235	0.166667	0.052632	0.193548	0.2	0.242424	0.192308	0.025641	0.233333	0.097561	0.090909	0.195122	0.133333	0.208333	0.153846	0.2	0.205128	0.933333	0.266667	0.103448	0.133333	0.101449	0.225806	0.129032	0.08	0.170732	0.121951	0.235294	0.166667	0.137931	0.193548	0.125	0.119048	0.142857	0.142857	0.241379	0.02439	0.125	0.184211	0.193548	0.212121	0.125	0.088608	0.073171	0.166667	0.233333	0.171429
0.190476	0.2	0.025	0.027027	0.208333	0.025	0.117647	0.15625	0.272727	0.185185	0.025	0.151515	0.121951	0.057143	0.162791	0.296296	0.304348	0.179487	0.193548	0.263158	0.363636	0.181818	0.222222	0.166667	0.084507	0.147059	0.2	0.076923	0.195122	0.119048	0.162162	0.16	0.259259	0.151515	0.193548	0.170732	0.222222	0.163265	0.15625	0.02381	0.193548	0.15	0.225806	0.138889	0.193548	0.115385	0.046512	0.2	0.151515	0.135135
0	0.042553	0.071429	0.117647	0.043478	0.090909	0.075472	0.098039	0.12963	0.02	0.071429	0.017857	0.031746	0.12	0.095238	0.08	0.042553	0.048387	0.037037	0.116667	0.042553	0.074074	0.083333	0.018868	0.2	0.115385	0.195652	0.175	0.192982	0.064516	0.127273	0	0.12766	0.075472	0.037037	0.030769	0	0.134328	0.076923	0.068966	0.098039	0.160714	0.096154	0.016949	0.076923	0.081633	0.207547	0.078431	0.075472	0.12963
0.117647	0.162162	0.038462	0.085106	0.166667	0.08	0.214286	0.190476	0.375	0.323529	0.038462	0.307692	0.204082	0.136364	0.4	0.2	0.162162	0.282609	0.282051	0.418605	0.194444	0.405405	0.095238	0.230769	0.216216	0.209302	0.113636	0.138889	0.347826	0.132075	0.365854	0.2	0.175	0.275	0.25	0.297872	0.314286	0.346154	0.219512	0.056604	0.136364	0.372093	0.186047	0.125	0.136364	0.176471	0.16	0.195122	0.416667	0.222222
0.129032	0.212121	0.108696	0.066667	0.3	0.133333	0.263158	0.305556	0.368421	0.3125	0.108696	0.333333	0.166667	0.146341	0.304348	0.216216	0.176471	0.244444	0.236842	0.348837	0.25	0.324324	0.102564	0.216216	0.225352	0.225	0.15	0.085714	0.372093	0.212766	0.292683	0.181818	0.257143	0.297297	0.236842	0.208333	0.228571	0.288462	0.27027	0.104167	0.119048	0.302326	0.263158	0.159091	0.093023	0.154762	0.1	0.277778	0.333333	0.268293
0.170732	0.204545	0.122807	0.109091	0.155556	0.122807	0.12963	0.132075	0.203704	0.195652	0.122807	0.270833	0.254545	0.111111	0.351852	0.208333	0.232558	0.352941	0.333333	0.245614	0.104167	0.24	0.142857	0.288889	0.234568	0.215686	0.113208	0.085106	0.220339	0.166667	0.2	0.155556	0.1875	0.386364	0.276596	0.42	0.217391	0.290323	0.22449	0.1	0.176471	0.210526	0.196078	0.163636	0.153846	0.208791	0.046154	0.255319	0.270833	0.160714
0.142857	0.321429	0.170732	0.022727	0.44	0.170732	0.153846	0.189189	0.4	0.3	0.170732	0.363636	0.204545	0.157895	0.425	0.4	0.275862	0.325	0.419355	0.375	0.15625	0.314286	0.212121	0.4	0.217391	0.277778	0.162162	0.060606	0.4	0.317073	0.25	0.16129	0.322581	0.363636	0.375	0.375	0.290323	0.28	0.333333	0.162791	0.257143	0.261905	0.323529	0.142857	0.222222	0.205128	0.019608	0.387097	0.25	0.225
0.122449	0.2	0.20339	0.133333	0.18	0.183333	0.114754	0.116667	0.263158	0.169811	0.224138	0.192982	0.169231	0.116667	0.230769	0.326531	0.22449	0.288136	0.240741	0.258065	0.071429	0.169492	0.125	0.25	0.175824	0.189655	0.1	0.09434	0.253968	0.241935	0.140625	0.113208	0.185185	0.236364	0.240741	0.344828	0.188679	0.208333	0.218182	0.196721	0.175439	0.151515	0.236364	0.126984	0.175439	0.21875	0.041667	0.245283	0.133333	0.16129
0.137931	0.1875	0.065217	0.095238	0.233333	0.065217	0.179487	0.184211	0.351351	0.333333	0.065217	0.314286	0.2	0.184211	0.318182	0.30303	0.266667	0.285714	0.451613	0.333333	0.1875	0.342857	0.171429	0.433333	0.25	0.27027	0.222222	0.058824	0.390244	0.195652	0.307692	0.193548	0.448276	0.4375	0.40625	0.4	0.322581	0.326531	0.285714	0.108696	0.25	0.2	0.243243	0.289474	0.25	0.17284	0.06	0.419355	0.314286	0.219512
0.178571	0.266667	0.113636	0.121951	0.321429	0.113636	0.210526	0.25	0.315789	0.290323	0.113636	0.393939	0.285714	0.153846	0.288889	0.30303	0.225806	0.35	0.5	0.333333	0.117647	0.342857	0.171429	0.482759	0.231884	0.305556	0.128205	0.028571	0.325581	0.309524	0.275	0.193548	0.272727	0.4375	0.451613	0.4	0.366667	0.3	0.323529	0.133333	0.25	0.227273	0.277778	0.225	0.216216	0.217949	0.06	0.375	0.314286	0.282051
0.241379	0.242424	0.181818	0.139535	0.25	0.181818	0.166667	0.2	0.325	0.264706	0.181818	0.324324	0.212766	0.142857	0.326087	0.243243	0.413793	0.266667	0.5	0.311111	0.138889	0.315789	0.189189	0.483871	0.205479	0.190476	0.119048	0.114286	0.276596	0.26087	0.285714	0.212121	0.25	0.361111	0.371429	0.439024	0.294118	0.236364	0.297297	0.125	0.230769	0.23913	0.195122	0.155556	0.2	0.166667	0.037037	0.305556	0.225	0.177778
0.205882	0.210526	0.163265	0.2	0.184211	0.1875	0.285714	0.292683	0.414634	0.230769	0.1875	0.35	0.169811	0.152174	0.346939	0.214286	0.314286	0.265306	0.394737	0.361702	0.179487	0.375	0.139535	0.457143	0.256757	0.222222	0.106383	0.189189	0.354167	0.285714	0.311111	0.153846	0.219512	0.35	0.325	0.391304	0.289474	0.303571	0.292683	0.18	0.204545	0.265306	0.227273	0.163265	0.177778	0.197674	0.089286	0.238095	0.285714	0.288889
0.107143	0.16129	0.146341	0.128205	0.206897	0.175	0.128205	0.131579	0.170732	0.151515	0.146341	0.128205	0.155556	0.194444	0.191489	0.28125	0.2	0.181818	0.264706	0.227273	0.16129	0.125	0.392857	0.205882	0.121622	0.25	0.272727	0.0625	0.195652	0.232558	0.113636	0.129032	0.290323	0.257143	0.194444	0.227273	0.147059	0.166667	0.264706	0.195122	0.954545	0.155556	0.257143	0.236842	0.791667	0.120482	0.085106	0.354839	0.128205	0.170732
0.137931	0.225806	0.113636	0.095238	0.275862	0.139535	0.277778	0.285714	0.388889	0.212121	0.113636	0.243243	0.2	0.25	0.380952	0.228571	0.1875	0.227273	0.323529	0.333333	0.225806	0.382353	0.242424	0.30303	0.231884	0.342857	0.189189	0.16129	0.461538	0.222222	0.342105	0.233333	0.3125	0.314286	0.216216	0.244444	0.242424	0.326531	0.40625	0.133333	0.216216	0.35	0.243243	0.166667	0.216216	0.17284	0.12766	0.517241	0.393939	0.315789
0.266667	0.30303	0.148936	0.108696	0.235294	0.148936	0.186047	0.190476	0.27907	0.285714	0.148936	0.378378	0.282609	0.111111	0.4	0.230769	0.264706	0.404762	0.470588	0.297872	0.131579	0.3	0.210526	0.454545	0.25	0.238095	0.139535	0.108108	0.291667	0.22449	0.244444	0.2	0.236842	0.416667	0.351351	0.452381	0.314286	0.346154	0.428571	0.098039	0.219512	0.255319	0.214286	0.148936	0.190476	0.25	0.035714	0.441176	0.307692	0.222222
0.193548	0.3125	0.204545	0.136364	0.242424	0.177778	0.136364	0.139535	0.2	0.189189	0.204545	0.190476	0.208333	0.139535	0.24	0.27027	0.3125	0.26087	0.324324	0.25	0.135135	0.186047	0.25	0.27027	0.171053	0.275	0.230769	0.142857	0.297872	0.229167	0.170213	0.205882	0.314286	0.315789	0.225	0.333333	0.216216	0.277778	0.441176	0.170213	0.324324	0.183673	0.25	0.177778	0.289474	0.178571	0.055556	0.714286	0.190476	0.173913
0.075	0.170732	0.594595	0.217391	0.119048	0.552632	0.12	0.122449	0.090909	0.020408	0.512821	0.037037	0.066667	0.195652	0.096774	0.152174	0.116279	0.103448	0.1	0.157895	0.021277	0.036364	0.108696	0.081633	0.117647	0.212766	0.08	0.15	0.080645	0.413043	0.051724	0.044444	0.106383	0.098039	0.1	0.157895	0.040816	0.071429	0.122449	0.386364	0.145833	0.084746	0.191489	0.053571	0.145833	0.179775	0.105263	0.102041	0.056604	0.153846
0.090909	0.177778	0.142857	0.089286	0.268293	0.142857	0.109091	0.132075	0.25	0.222222	0.142857	0.22	0.189655	0.111111	0.237288	0.234043	0.152174	0.301887	0.333333	0.267857	0.081633	0.24	0.142857	0.234043	0.234568	0.215686	0.156863	0.040816	0.309091	0.25	0.2	0.130435	0.23913	0.326087	0.22449	0.245614	0.217391	0.290323	0.2	0.157895	0.2	0.189655	0.297872	0.163636	0.2	0.182796	0.046154	0.311111	0.196078	0.160714
0.090909	0.152174	0.066667	0.089286	0.238095	0.066667	0.244898	0.2	0.27451	0.222222	0.066667	0.297872	0.232143	0.153846	0.303571	0.26087	0.152174	0.326923	0.276596	0.245614	0.081633	0.215686	0.12	0.26087	0.388889	0.215686	0.134615	0.02	0.309091	0.22807	0.222222	0.130435	0.266667	0.270833	0.22449	0.267857	0.217391	0.355932	0.2	0.137931	0.176471	0.189655	0.244898	0.254902	0.153846	0.208791	0.046154	0.311111	0.173077	0.226415
0.152174	0.208333	0.210526	0.047619	0.23913	0.189655	0.1	0.140351	0.206897	0.2	0.254545	0.269231	0.174603	0.065574	0.3	0.211538	0.208333	0.423077	0.3	0.245902	0.09434	0.218182	0.12963	0.26	0.25	0.155172	0.103448	0.076923	0.222222	0.293103	0.20339	0.096154	0.169811	0.245283	0.25	0.333333	0.196078	0.268657	0.160714	0.20339	0.140351	0.174603	0.222222	0.095238	0.140351	0.306818	0	0.185185	0.178571	0.186441
0.095238	0.159091	0.107143	0.092593	0.25	0.107143	0.113208	0.137255	0.211538	0.177778	0.107143	0.18	0.196429	0.115385	0.183333	0.217391	0.133333	0.264151	0.234043	0.210526	0.085106	0.153846	0.125	0.244444	0.240506	0.22449	0.14	0.042553	0.25	0.214286	0.142857	0.136364	0.222222	0.229167	0.208333	0.210526	0.227273	0.238095	0.183673	0.122807	0.16	0.155172	0.311111	0.127273	0.16	0.16129	0.047619	0.295455	0.156863	0.166667
0.178571	0.151515	0.166667	0.095238	0.233333	0.195122	0.483871	0.666667	0.219512	0.176471	0.166667	0.243243	0.125	0.451613	0.234043	0.228571	0.266667	0.148936	0.25	0.302326	0.1875	0.236842	0.138889	0.264706	0.307692	0.236842	0.073171	0.090909	0.23913	0.410256	0.275	0.121212	0.235294	0.243243	0.285714	0.166667	0.205882	0.27451	0.25	0.243902	0.153846	0.255814	0.277778	0.289474	0.125	0.17284	0.152174	0.189189	0.243243	0.428571
0.115385	0.214286	0.125	0.076923	0.269231	0.125	0.135135	0.138889	0.243243	0.2	0.125	0.2	0.219512	0.205882	0.227273	0.392857	0.259259	0.25	0.322581	0.444444	0.172414	0.194444	0.233333	0.258065	0.157143	0.30303	0.176471	0.066667	0.325	0.186047	0.205128	0.178571	0.357143	0.235294	0.28125	0.268293	0.275862	0.244898	0.28125	0.146341	0.28125	0.219512	0.272727	0.184211	0.28125	0.151899	0.088889	0.333333	0.166667	0.243243
0.049383	0.071429	0.10989	0.076923	0.085366	0.10989	0.152941	0.141176	0.172414	0.121951	0.122222	0.126437	0.177778	0.141176	0.222222	0.104651	0.071429	0.191011	0.168675	0.213483	0.084337	0.164706	0.081395	0.130952	0.256881	0.164706	0.066667	0.073171	0.159574	0.175824	0.197674	0.085366	0.08046	0.166667	0.114943	0.136842	0.120482	0.231579	0.141176	0.157303	0.114943	0.164835	0.126437	0.147727	0.114943	0.166667	0.082474	0.142857	0.152941	0.159091
0	0.039216	0.142857	0.12963	0.061224	0.185185	0.22	0.2	0.140351	0.037736	0.122807	0.051724	0.061538	0.25	0.123077	0.074074	0.039216	0.045455	0.071429	0.145161	0.06	0.127273	0.056604	0.054545	0.219512	0.192308	0.017241	0.108696	0.107692	0.206897	0.2	0.04	0.055556	0.12963	0.052632	0.059701	0.037037	0.142857	0.090909	0.222222	0.090909	0.210526	0.173077	0.103448	0.071429	0.111111	0.259259	0.072727	0.12963	0.203704
0.129032	0.142857	0.0625	0.066667	0.181818	0.085106	0.333333	0.342857	0.268293	0.272727	0.0625	0.333333	0.142857	0.205128	0.276596	0.153846	0.176471	0.244444	0.305556	0.26087	0.25	0.361111	0.102564	0.25	0.298507	0.166667	0.15	0.085714	0.311111	0.1875	0.358974	0.147059	0.222222	0.371429	0.27027	0.208333	0.228571	0.313725	0.205128	0.104167	0.093023	0.217391	0.2	0.243902	0.093023	0.141176	0.078431	0.277778	0.371429	0.268293
0.2	0.318182	0	0	0.272727	0	0.121212	0.125	0.205882	0.24	0	0.233333	0.125	0.028571	0.225	0.259259	0.26087	0.184211	0.285714	0.236842	0.208333	0.225806	0.103448	0.214286	0.085714	0.151515	0.129032	0.038462	0.170732	0.095238	0.2	0.166667	0.178571	0.193548	0.16129	0.146341	0.230769	0.142857	0.2	0.02439	0.125	0.184211	0.15625	0.142857	0.125	0.075	0	0.206897	0.233333	0.108108
0.185185	0.193548	0.142857	0.071429	0.2	0.2	0.363636	0.419355	0.361111	0.114286	0.142857	0.184211	0.104167	0.189189	0.266667	0.2	0.193548	0.177778	0.189189	0.25	0.193548	0.277778	0.111111	0.235294	0.272727	0.277778	0.102564	0.206897	0.272727	0.317073	0.282051	0.058824	0.205882	0.216216	0.222222	0.145833	0.176471	0.185185	0.222222	0.162791	0.128205	0.325	0.285714	0.142857	0.1	0.160494	0.181818	0.162162	0.285714	0.4
0.075472	0.107143	0.106061	0.147541	0.12963	0.123077	0.186441	0.189655	0.233333	0.142857	0.106061	0.147541	0.181818	0.210526	0.205882	0.196429	0.107143	0.2	0.169492	0.269841	0.169811	0.20339	0.101695	0.135593	0.238636	0.245614	0.114754	0.090909	0.246154	0.19697	0.209677	0.12963	0.2	0.206897	0.15	0.212121	0.140351	0.271429	0.189655	0.136364	0.131148	0.238095	0.22807	0.15873	0.131148	0.239583	0.222222	0.236364	0.22807	0.193548
0.153846	0.206897	0.095238	0.075	0.307692	0.095238	0.194444	0.2	0.342857	0.423077	0.069767	0.433333	0.275	0.135135	0.375	0.25	0.25	0.378378	0.826087	0.358974	0.206897	0.466667	0.1875	0.538462	0.223881	0.257143	0.138889	0.03125	0.35	0.238095	0.371429	0.259259	0.258065	0.535714	0.354839	0.394737	0.357143	0.319149	0.4	0.090909	0.235294	0.275	0.228571	0.210526	0.2	0.194805	0.041667	0.413793	0.34375	0.205128
0.162162	0.263158	0.18	0.142857	0.205128	0.204082	0.191489	0.25	0.22449	0.111111	0.18	0.142857	0.066667	0.122449	0.172414	0.177778	0.230769	0.142857	0.145833	0.157895	0.142857	0.212766	0.085106	0.104167	0.202532	0.212766	0.08	0.210526	0.196429	0.203704	0.244898	0.068182	0.130435	0.142857	0.145833	0.2	0.085106	0.171875	0.170213	0.089286	0.1	0.306122	0.217391	0.092593	0.078431	0.166667	0.211538	0.148936	0.191489	0.2
0.173913	0.28	0.131579	0.142857	0.291667	0.162162	0.333333	0.392857	0.257143	0.214286	0.131579	0.25	0.116279	0.181818	0.238095	0.233333	0.230769	0.170732	0.21875	0.282051	0.230769	0.366667	0.129032	0.15625	0.179104	0.322581	0.117647	0.25	0.307692	0.225	0.323529	0.148148	0.2	0.212121	0.181818	0.136364	0.166667	0.229167	0.3	0.125	0.147059	0.333333	0.290323	0.162162	0.114286	0.141026	0.205128	0.225806	0.333333	0.333333
0.166667	0.2	0.226415	0.148148	0.152174	0.226415	0.215686	0.22	0.375	0.191489	0.226415	0.215686	0.111111	0.150943	0.321429	0.255319	0.227273	0.272727	0.270833	0.358491	0.125	0.285714	0.117647	0.282609	0.2625	0.211538	0.090909	0.209302	0.303571	0.267857	0.288462	0.104167	0.234043	0.319149	0.297872	0.333333	0.266667	0.265625	0.244898	0.196429	0.150943	0.22807	0.215686	0.12069	0.150943	0.233333	0.15	0.22449	0.319149	0.32
0	0.057143	0.2	0.125	0.058824	0.2	0.184211	0.189189	0.139535	0.026316	0.2	0.071429	0.039216	0.189189	0.096154	0.05	0.027778	0.039216	0.023256	0.122449	0.088235	0.15	0.052632	0.02439	0.183099	0.210526	0.02381	0.166667	0.098039	0.125	0.219512	0.058824	0.051282	0.071429	0.073171	0.037736	0.025641	0.066667	0.073171	0.190476	0.023256	0.204545	0.153846	0.066667	0.023256	0.093023	0.485714	0.02381	0.125	0.195122
0.148148	0.2	0.068182	0.073171	0.25	0.021739	0.157895	0.131579	0.2	0.1875	0.068182	0.189189	0.155556	0.075	0.166667	0.205882	0.16129	0.130435	0.228571	0.2	0.241379	0.216216	0.147059	0.171429	0.106667	0.216216	0.105263	0.030303	0.145833	0.12766	0.195122	0.25	0.176471	0.189189	0.131579	0.148936	0.181818	0.145455	0.264706	0.113636	0.228571	0.209302	0.157895	0.305556	0.228571	0.148148	0.085106	0.235294	0.222222	0.170732
0.105263	0.119048	0.208333	0.122449	0.15	0.26087	0.25	0.255814	0.255319	0.166667	0.183673	0.170213	0.188679	0.255814	0.240741	0.268293	0.146341	0.26	0.285714	0.3	0.175	0.217391	0.162791	0.268293	0.189873	0.302326	0.104167	0.125	0.346939	0.333333	0.25	0.15	0.275	0.341463	0.255814	0.3	0.219512	0.275862	0.317073	0.25	0.255814	0.235294	0.309524	0.183673	0.227273	0.268293	0.148148	0.325	0.25	0.282609
0.210526	0.473684	0.147059	0.028571	0.928571	0.147059	0.16129	0.25	0.25	0.25	0.147059	0.241379	0.128205	0.129032	0.2	0.32	0.333333	0.257143	0.296296	0.210526	0.217391	0.233333	0.192308	0.222222	0.119403	0.275862	0.133333	0.04	0.205128	0.25	0.205882	0.173913	0.28	0.285714	0.25	0.179487	0.192308	0.170213	0.296296	0.108108	0.206897	0.222222	0.285714	0.181818	0.166667	0.118421	0.02381	0.307692	0.2	0.212121
0.190476	0.363636	0.078947	0.085714	0.380952	0.078947	0.1875	0.193548	0.2	0.28	0.078947	0.225806	0.179487	0.15625	0.190476	0.458333	0.25	0.243243	0.275862	0.263158	0.2	0.21875	0.137931	0.25	0.132353	0.3	0.125	0.037037	0.195122	0.205128	0.194444	0.208333	0.214286	0.310345	0.233333	0.230769	0.222222	0.1875	0.275862	0.102564	0.233333	0.179487	0.310345	0.242424	0.193548	0.12987	0.071429	0.333333	0.225806	0.2
0.074074	0.214286	0.097561	0.235294	0.269231	0.097561	0.166667	0.171429	0.210526	0.241379	0.097561	0.235294	0.190476	0.242424	0.2	0.21875	0.133333	0.136364	0.242424	0.238095	0.307692	0.264706	0.193548	0.181818	0.140845	0.34375	0.111111	0.103448	0.204545	0.159091	0.205128	0.222222	0.1875	0.272727	0.171429	0.181818	0.193548	0.196078	0.28125	0.175	0.205882	0.219512	0.3125	0.216216	0.205882	0.123457	0.139535	0.25	0.235294	0.210526
0.117647	0.228571	0.125	0.0625	0.235294	0.125	0.159091	0.162791	0.27907	0.285714	0.125	0.307692	0.229167	0.162791	0.369565	0.333333	0.228571	0.404762	0.470588	0.418605	0.162162	0.333333	0.210526	0.411765	0.25	0.268293	0.25641	0.051282	0.377778	0.22449	0.302326	0.166667	0.342857	0.457143	0.351351	0.355556	0.277778	0.346154	0.315789	0.142857	0.282051	0.229167	0.275	0.2	0.25	0.204819	0.054545	0.441176	0.275	0.222222
0.151515	0.131579	0.102041	0.0625	0.166667	0.102041	0.214286	0.282051	0.71875	0.216216	0.102041	0.342105	0.156863	0.162791	0.431818	0.230769	0.264706	0.229167	0.388889	0.418605	0.194444	0.444444	0.095238	0.371429	0.285714	0.209302	0.113636	0.171429	0.409091	0.2	0.435897	0.105263	0.27027	0.342105	0.388889	0.326087	0.314286	0.272727	0.25	0.098039	0.136364	0.372093	0.186047	0.125	0.111111	0.25	0.183673	0.195122	0.342105	0.27907
0	0	0.076923	0.181818	0.034483	0.105263	0.181818	0.151515	0.075	0.03125	0.076923	0.083333	0.119048	0.151515	0.085106	0.058824	0	0.021739	0.055556	0.113636	0.107143	0.176471	0.0625	0.058824	0.083333	0.176471	0	0.16	0.111111	0.066667	0.157895	0.153846	0.060606	0.114286	0.027027	0.042553	0.0625	0.115385	0.117647	0.1	0.055556	0.175	0.114286	0.105263	0.055556	0.128205	0.243243	0.057143	0.147059	0.162162
0.147059	0.128205	0.078431	0.061224	0.131579	0.1	0.368421	0.5	0.365854	0.179487	0.078431	0.3	0.071429	0.307692	0.306122	0.139535	0.157895	0.22449	0.243902	0.265306	0.189189	0.325	0.044444	0.324324	0.4	0.177778	0.06383	0.105263	0.285714	0.270833	0.425	0.075	0.116279	0.3	0.307692	0.192308	0.27027	0.267857	0.186047	0.14	0.0625	0.304348	0.181818	0.195652	0.0625	0.216867	0.156863	0.136364	0.268293	0.365854
0.142857	0.233333	0.116279	0.071429	0.285714	0.116279	0.184211	0.189189	0.289474	0.3	0.116279	0.40625	0.232558	0.157895	0.357143	0.235294	0.233333	0.432432	0.692308	0.309524	0.193548	0.393939	0.142857	0.448276	0.235294	0.243243	0.102564	0.060606	0.272727	0.2	0.351351	0.2	0.242424	0.607143	0.419355	0.375	0.333333	0.28	0.294118	0.111111	0.189189	0.232558	0.25	0.230769	0.189189	0.189873	0.061224	0.30303	0.323529	0.289474
0.157895	0.285714	0.1875	0.129032	0.083333	0.1875	0	0.0625	0.114286	0	0.1875	0.029412	0.04878	0.133333	0.093023	0.142857	0.285714	0.102564	0.133333	0.125	0.038462	0.028571	0.153846	0.103448	0.057143	0.090909	0.178571	0.190476	0.095238	0.073171	0.052632	0	0.148148	0.060606	0.096774	0.153846	0	0.038462	0.0625	0.081081	0.133333	0.075	0.09375	0	0.133333	0.063291	0	0.1	0	0.054054
0.114286	0.157895	0.145833	0.04	0.194444	0.122449	0.181818	0.243902	0.473684	0.243243	0.145833	0.268293	0.2	0.186047	0.391304	0.195122	0.189189	0.304348	0.378378	0.409091	0.257143	0.472222	0.119048	0.289474	0.246575	0.261905	0.111111	0.166667	0.3125	0.150943	0.425	0.131579	0.2	0.333333	0.243902	0.265306	0.205128	0.267857	0.243902	0.14	0.133333	0.363636	0.209302	0.122449	0.108696	0.202381	0.156863	0.219512	0.405405	0.217391
0.088889	0.125	0.048387	0.068966	0.177778	0.048387	0.127273	0.150943	0.2	0.217391	0.048387	0.265306	0.296296	0.089286	0.396226	0.229167	0.148936	0.346154	0.326087	0.263158	0.102041	0.235294	0.14	0.311111	0.278481	0.188679	0.153846	0.019608	0.327273	0.145161	0.196429	0.152174	0.288889	0.291667	0.270833	0.333333	0.23913	0.35	0.196078	0.080645	0.196078	0.206897	0.24	0.203704	0.173077	0.206522	0.045455	0.304348	0.215686	0.157895
0.116279	0.104167	0.032258	0.051724	0.130435	0.032258	0.173077	0.176471	0.326531	0.222222	0.032258	0.355556	0.210526	0.071429	0.377358	0.183673	0.12766	0.326923	0.276596	0.314815	0.177778	0.319149	0.12	0.234043	0.333333	0.148148	0.053571	0.040816	0.333333	0.129032	0.294118	0.155556	0.1875	0.270833	0.304348	0.314815	0.272727	0.355932	0.176471	0.03125	0.090909	0.232143	0.150943	0.122807	0.090909	0.27907	0.079365	0.18	0.297872	0.160714
0.102564	0.170732	0.072727	0.098039	0.205128	0.053571	0.142857	0.145833	0.2	0.25	0.072727	0.333333	0.361702	0.145833	0.333333	0.177778	0.170732	0.361702	0.447368	0.245283	0.142857	0.295455	0.133333	0.358974	0.202532	0.1875	0.08	0.022222	0.218182	0.160714	0.244898	0.342857	0.155556	0.473684	0.27907	0.346939	0.243902	0.271186	0.222222	0.089286	0.170213	0.28	0.217391	0.204082	0.170213	0.22093	0.067797	0.227273	0.272727	0.176471
0.189189	0.225	0.153846	0.096154	0.142857	0.176471	0.325581	0.365854	0.355556	0.186047	0.153846	0.266667	0.12069	0.217391	0.352941	0.125	0.225	0.25	0.272727	0.34	0.166667	0.348837	0.106383	0.317073	0.297297	0.208333	0.1	0.205128	0.333333	0.245283	0.409091	0.090909	0.152174	0.325581	0.244444	0.288462	0.209302	0.288136	0.217391	0.148148	0.098039	0.3	0.1875	0.2	0.098039	0.191011	0.163636	0.170213	0.295455	0.326087
0.15625	0.135135	0.104167	0.086957	0.138889	0.104167	0.219512	0.25641	0.421053	0.222222	0.081633	0.315789	0.115385	0.113636	0.44186	0.175	0.166667	0.318182	0.25641	0.304348	0.166667	0.416667	0.071429	0.424242	0.348485	0.159091	0.090909	0.142857	0.297872	0.204082	0.341463	0.108108	0.15	0.351351	0.361111	0.22449	0.285714	0.301887	0.195122	0.078431	0.113636	0.26087	0.162791	0.104167	0.113636	0.2375	0.075472	0.170732	0.388889	0.255814
0.15625	0.166667	0.081633	0.06383	0.205882	0.081633	0.25	0.25641	0.421053	0.257143	0.081633	0.315789	0.208333	0.139535	0.377778	0.205128	0.166667	0.288889	0.361111	0.333333	0.235294	0.545455	0.153846	0.305556	0.219178	0.186047	0.090909	0.142857	0.355556	0.156863	0.486486	0.205882	0.179487	0.388889	0.324324	0.304348	0.323529	0.301887	0.25641	0.078431	0.113636	0.380952	0.190476	0.177778	0.113636	0.207317	0.1875	0.2	0.470588	0.255814
0.142857	0.193548	0.090909	0.046512	0.2	0.090909	0.285714	0.333333	0.324324	0.258065	0.090909	0.323529	0.152174	0.157895	0.390244	0.135135	0.15625	0.325	0.419355	0.341463	0.233333	0.533333	0.111111	0.354839	0.235294	0.210526	0.102564	0.166667	0.365854	0.2	0.470588	0.125	0.138889	0.451613	0.294118	0.25	0.25	0.333333	0.257143	0.086957	0.1	0.358974	0.216216	0.142857	0.1	0.189873	0.130435	0.194444	0.451613	0.289474
0.21875	0.222222	0.170213	0.209302	0.162162	0.170213	0.209302	0.243902	0.272727	0.243243	0.170213	0.268293	0.153846	0.108696	0.28	0.113636	0.189189	0.22449	0.275	0.215686	0.189189	0.432432	0.093023	0.225	0.166667	0.177778	0.06383	0.2	0.26	0.173077	0.425	0.162162	0.116279	0.3	0.214286	0.265306	0.205128	0.245614	0.186047	0.117647	0.108696	0.25	0.181818	0.170213	0.108696	0.16092	0.18	0.162791	0.444444	0.217391
0.21875	0.294118	0.122449	0.061224	0.194444	0.122449	0.130435	0.159091	0.365854	0.210526	0.122449	0.333333	0.132075	0.040816	0.422222	0.289474	0.294118	0.333333	0.275	0.291667	0.1	0.177778	0.119048	0.324324	0.22973	0.12766	0.086957	0.105263	0.369565	0.173077	0.212766	0.102564	0.263158	0.268293	0.416667	0.377778	0.305556	0.365385	0.186047	0.036364	0.159091	0.153846	0.181818	0.1	0.133333	0.2625	0.035088	0.219512	0.209302	0.166667
0.076923	0.175	0.657143	0.195652	0.15	0.611111	0.1	0.125	0.092593	0.020833	0.567568	0.037736	0.05	0.173913	0.098361	0.130435	0.119048	0.105263	0.08	0.140351	0.021739	0.037037	0.086957	0.083333	0.105882	0.191489	0.081633	0.153846	0.081967	0.391304	0.052632	0.022222	0.085106	0.078431	0.102041	0.160714	0.020408	0.057143	0.102041	0.363636	0.125	0.086207	0.170213	0.035714	0.125	0.181818	0.087719	0.081633	0.037736	0.156863
0.153846	0.166667	0.069767	0.075	0.214286	0.095238	0.30303	0.3125	0.382353	0.321429	0.069767	0.433333	0.159091	0.166667	0.410256	0.142857	0.166667	0.342105	0.448276	0.358974	0.296296	0.62963	0.117647	0.37931	0.223881	0.222222	0.078947	0.1	0.384615	0.181818	0.454545	0.172414	0.147059	0.482759	0.3125	0.261905	0.310345	0.319149	0.272727	0.066667	0.105263	0.342105	0.264706	0.210526	0.105263	0.194805	0.136364	0.205882	0.535714	0.27027
0.294118	0.285714	0.085714	0.060606	0.444444	0.085714	0.296296	0.307692	0.21875	0.208333	0.085714	0.296296	0.131579	0.133333	0.205128	0.391304	0.35	0.228571	0.307692	0.216216	0.227273	0.241379	0.2	0.391304	0.15625	0.2	0.064516	0	0.210526	0.257143	0.176471	0.181818	0.291667	0.296296	0.307692	0.216216	0.304348	0.148936	0.214286	0.081081	0.214286	0.162162	0.25	0.225806	0.172414	0.135135	0.05	0.269231	0.25	0.3
0.190476	0.428571	0.138889	0.055556	0.705882	0.138889	0.1875	0.233333	0.235294	0.230769	0.138889	0.225806	0.15	0.15625	0.190476	0.458333	0.304348	0.277778	0.321429	0.230769	0.2	0.21875	0.222222	0.25	0.132353	0.3	0.125	0.037037	0.225	0.305556	0.194444	0.208333	0.307692	0.310345	0.233333	0.230769	0.222222	0.1875	0.321429	0.131579	0.275862	0.210526	0.357143	0.205882	0.233333	0.12987	0.046512	0.333333	0.225806	0.235294
0.133333	0.12	0.046875	0.084746	0.170213	0.063492	0.185185	0.188679	0.36	0.208333	0.046875	0.28	0.241379	0.125	0.381818	0.22	0.12	0.285714	0.285714	0.321429	0.142857	0.354167	0.134615	0.244898	0.320513	0.181818	0.148148	0.102041	0.388889	0.140625	0.326923	0.145833	0.276596	0.28	0.26	0.275862	0.311111	0.509091	0.211538	0.078125	0.166667	0.333333	0.207547	0.135593	0.166667	0.255556	0.126984	0.265306	0.333333	0.214286
0.166667	0.269231	0.1	0.108108	0.391304	0.1	0.171429	0.176471	0.285714	0.206897	0.1	0.205882	0.195122	0.25	0.204545	0.461538	0.32	0.289474	0.333333	0.275	0.222222	0.2	0.241379	0.266667	0.142857	0.354839	0.114286	0.068966	0.209302	0.25	0.179487	0.185185	0.321429	0.322581	0.212121	0.243902	0.241379	0.22449	0.290323	0.15	0.290323	0.195122	0.518519	0.257143	0.25	0.125	0.066667	0.344828	0.205882	0.25
0.2	0.205128	0.208333	0.222222	0.15	0.234043	0.222222	0.227273	0.229167	0.166667	0.208333	0.195652	0.145455	0.2	0.240741	0.209302	0.205128	0.235294	0.2	0.27451	0.175	0.244444	0.162791	0.209302	0.160494	0.272727	0.081633	0.153846	0.245283	0.230769	0.25	0.15	0.275	0.25	0.255814	0.326531	0.219512	0.254237	0.285714	0.176471	0.173913	0.188679	0.25	0.183673	0.173913	0.195402	0.148148	0.261905	0.25	0.255319
0.135135	0.119048	0.054545	0.1	0.15	0.054545	0.170213	0.173913	0.204082	0.195122	0.054545	0.25	0.145455	0.125	0.264151	0.238095	0.146341	0.235294	0.255814	0.203704	0.119048	0.217391	0.219512	0.368421	0.220779	0.191489	0.204545	0.046512	0.32	0.185185	0.176471	0.121951	0.275	0.309524	0.317073	0.27451	0.315789	0.275862	0.227273	0.090909	0.285714	0.125	0.195652	0.208333	0.285714	0.195402	0.050847	0.358974	0.195652	0.18
0.111111	0.153846	0.12	0.081633	0.189189	0.142857	0.232558	0.268293	0.357143	0.175	0.12	0.394737	0.173077	0.181818	0.3	0.190476	0.153846	0.196078	0.268293	0.285714	0.25	0.384615	0.142857	0.219512	0.194805	0.255814	0.108696	0.131579	0.28	0.215686	0.348837	0.157895	0.195122	0.232558	0.268293	0.26	0.2	0.263158	0.209302	0.115385	0.130435	0.297872	0.204545	0.191489	0.130435	0.159091	0.22449	0.186047	0.358974	0.23913
0.085714	0.162162	0.125	0.133333	0.2	0.148936	0.186047	0.190476	0.27907	0.25	0.125	0.214286	0.229167	0.219512	0.3125	0.297297	0.162162	0.255319	0.282051	0.452381	0.194444	0.209302	0.179487	0.2	0.184211	0.368421	0.166667	0.138889	0.347826	0.2	0.217391	0.2	0.27027	0.275	0.219512	0.297872	0.243243	0.320755	0.282051	0.166667	0.219512	0.311111	0.307692	0.148936	0.25	0.176471	0.137255	0.25641	0.243902	0.27907
0.135135	0.205128	0.074074	0.037736	0.179487	0.115385	0.25	0.285714	0.372093	0.225	0.074074	0.341463	0.166667	0.173913	0.488889	0.209302	0.205128	0.340426	0.317073	0.382979	0.175	0.365854	0.111111	0.368421	0.362319	0.217391	0.12766	0.153846	0.404255	0.185185	0.363636	0.095238	0.214286	0.309524	0.35	0.3	0.315789	0.37037	0.227273	0.071429	0.125	0.340426	0.170213	0.115385	0.102041	0.3	0.127273	0.177778	0.309524	0.255319
0.173913	0.185185	0.102564	0.111111	0.148148	0.075	0.111111	0.083333	0.1	0.214286	0.102564	0.176471	0.411765	0.083333	0.130435	0.121212	0.142857	0.142857	0.21875	0.136364	0.142857	0.138889	0.206897	0.15625	0.082192	0.205882	0.055556	0.071429	0.108696	0.088889	0.153846	0.722222	0.125	0.212121	0.147059	0.219512	0.206897	0.156863	0.21875	0.097561	0.181818	0.170732	0.212121	0.194444	0.181818	0.098765	0.093023	0.266667	0.212121	0.1
0.16	0.214286	0.046512	0.076923	0.178571	0.071429	0.235294	0.242424	0.314286	0.285714	0.046512	0.448276	0.162791	0.108108	0.317073	0.147059	0.214286	0.315789	0.413793	0.3	0.307692	0.482759	0.088235	0.344828	0.191176	0.194444	0.111111	0.103448	0.292683	0.159091	0.382353	0.137931	0.117647	0.448276	0.28125	0.238095	0.275862	0.244898	0.242424	0.044444	0.078947	0.25	0.235294	0.216216	0.078947	0.181818	0.088889	0.176471	0.354839	0.210526
0.205882	0.210526	0.117647	0.148936	0.153846	0.14	0.285714	0.292683	0.45	0.230769	0.117647	0.35	0.107143	0.152174	0.375	0.159091	0.277778	0.192308	0.292683	0.333333	0.210526	0.410256	0.113636	0.307692	0.328571	0.195652	0.061224	0.222222	0.354167	0.166667	0.372093	0.125	0.162791	0.285714	0.292683	0.306122	0.25641	0.258621	0.232558	0.053571	0.104167	0.319149	0.173913	0.14	0.081633	0.170455	0.196078	0.181818	0.317073	0.288889
0.114286	0.157895	0.122449	0.04	0.194444	0.122449	0.209302	0.243902	0.473684	0.243243	0.122449	0.405405	0.304348	0.159091	0.560976	0.166667	0.222222	0.363636	0.457143	0.409091	0.222222	0.514286	0.119048	0.289474	0.246575	0.261905	0.111111	0.166667	0.4	0.196078	0.461538	0.194444	0.2	0.333333	0.275	0.291667	0.205128	0.365385	0.275	0.117647	0.133333	0.5	0.209302	0.122449	0.108696	0.231707	0.092593	0.219512	0.444444	0.272727
0.142857	0.15625	0.090909	0.153846	0.2	0.116279	0.25	0.294118	0.484848	0.258065	0.066667	0.363636	0.152174	0.157895	0.425	0.2	0.233333	0.261905	0.375	0.375	0.233333	0.483871	0.176471	0.4	0.253731	0.210526	0.102564	0.166667	0.4	0.2	0.428571	0.16129	0.242424	0.40625	0.375	0.27907	0.290323	0.306122	0.257143	0.086957	0.157895	0.358974	0.216216	0.170732	0.157895	0.175	0.083333	0.228571	0.40625	0.289474
0.291667	0.384615	0.119048	0.128205	0.25	0.119048	0.157895	0.131579	0.2	0.310345	0.119048	0.333333	0.268293	0.04878	0.272727	0.242424	0.384615	0.238095	0.34375	0.317073	0.16129	0.285714	0.114286	0.242424	0.136986	0.216216	0.105263	0.133333	0.222222	0.152174	0.289474	0.296296	0.176471	0.294118	0.228571	0.384615	0.3	0.26	0.264706	0.065217	0.162162	0.268293	0.189189	0.175	0.131579	0.148148	0.0625	0.272727	0.333333	0.142857
0.137931	0.1875	0.088889	0.095238	0.233333	0.113636	0.314286	0.285714	0.388889	0.290323	0.088889	0.393939	0.173913	0.153846	0.380952	0.162162	0.1875	0.35	0.5	0.333333	0.266667	0.566667	0.138889	0.387097	0.231884	0.205128	0.1	0.16129	0.390244	0.195652	0.457143	0.15625	0.166667	0.4375	0.323529	0.272727	0.28125	0.326531	0.285714	0.085106	0.153846	0.35	0.210526	0.225	0.153846	0.1875	0.12766	0.222222	0.4375	0.282051
0.151515	0.194444	0.459459	0.133333	0.272727	0.35	0.342105	0.351351	0.195652	0.125	0.421053	0.186047	0.134615	0.190476	0.211538	0.297297	0.194444	0.229167	0.190476	0.244898	0.131579	0.155556	0.15	0.230769	0.2	0.268293	0.113636	0.078947	0.192308	0.538462	0.166667	0.105263	0.205128	0.214286	0.219512	0.196078	0.15	0.186441	0.219512	0.473684	0.190476	0.204082	0.342105	0.227273	0.162791	0.190476	0.115385	0.195122	0.159091	0.375
0.105263	0.119048	0.137255	0.078431	0.121951	0.137255	0.222222	0.227273	0.18	0.088889	0.137255	0.1	0.145455	0.173913	0.175439	0.181818	0.119048	0.086207	0.08	0.203704	0.119048	0.191489	0.136364	0.083333	0.13253	0.142857	0.081633	0.153846	0.269231	0.142857	0.153846	0.179487	0.159091	0.170213	0.173913	0.12069	0.162791	0.193548	0.173913	0.111111	0.125	0.188679	0.170213	0.137255	0.125	0.223529	0.192308	0.12766	0.170213	0.156863
0.128205	0.166667	0.395349	0.14	0.230769	0.363636	0.295455	0.302326	0.22	0.133333	0.333333	0.163265	0.12069	0.272727	0.189655	0.285714	0.166667	0.226415	0.217391	0.264151	0.139535	0.137255	0.130435	0.2	0.21519	0.288889	0.1	0.068182	0.172414	0.692308	0.192308	0.116279	0.177778	0.1875	0.166667	0.196429	0.155556	0.206349	0.244444	0.409091	0.191489	0.181818	0.357143	0.2	0.166667	0.191011	0.103448	0.195652	0.14	0.297872
0.1	0.166667	0.176471	0.055556	0.2	0.153846	0.163265	0.217391	0.386364	0.214286	0.176471	0.266667	0.181818	0.166667	0.352941	0.35	0.166667	0.382979	0.365854	0.425532	0.195122	0.318182	0.155556	0.285714	0.230769	0.26087	0.145833	0.093023	0.333333	0.269231	0.265306	0.142857	0.232558	0.325581	0.333333	0.288462	0.238095	0.288136	0.244444	0.192308	0.166667	0.27451	0.266667	0.132075	0.166667	0.247059	0.084746	0.25	0.325581	0.244898
0.15625	0.2	0.12766	0.086957	0.242424	0.12766	0.282051	0.324324	0.384615	0.294118	0.12766	0.388889	0.183673	0.166667	0.44186	0.205128	0.235294	0.318182	0.4	0.363636	0.2	0.416667	0.184211	0.382353	0.289855	0.275	0.2	0.142857	0.487805	0.255319	0.341463	0.171429	0.314286	0.388889	0.361111	0.304348	0.285714	0.4375	0.361111	0.122449	0.166667	0.318182	0.219512	0.152174	0.166667	0.253165	0.075472	0.411765	0.428571	0.285714
0.12766	0.234043	0.210526	0.1	0.163265	0.232143	0.178571	0.203704	0.372549	0.176471	0.210526	0.245283	0.138462	0.140351	0.3	0.285714	0.26087	0.233333	0.25	0.52	0.16	0.288462	0.109091	0.211538	0.206897	0.175439	0.103448	0.166667	0.375	0.190476	0.267857	0.096154	0.24	0.245283	0.27451	0.288136	0.22	0.268657	0.203704	0.163934	0.160714	0.254237	0.178571	0.112903	0.140351	0.210526	0.106061	0.207547	0.245283	0.272727
0.15	0.243902	0.215686	0.113208	0.162791	0.215686	0.18	0.208333	0.188679	0.06	0.215686	0.072727	0.098361	0.137255	0.145161	0.217391	0.186047	0.098361	0.054545	0.189655	0.108696	0.153846	0.102041	0.076923	0.126437	0.132075	0.075472	0.195122	0.22807	0.172414	0.142857	0.111111	0.122449	0.134615	0.137255	0.189655	0.125	0.164179	0.137255	0.122807	0.09434	0.175439	0.204082	0.107143	0.09434	0.213483	0.157895	0.096154	0.134615	0.145455
0.095238	0.214286	0.107143	0.072727	0.315789	0.107143	0.113208	0.137255	0.26	0.232558	0.107143	0.229167	0.196429	0.115385	0.224138	0.272727	0.159091	0.313725	0.348837	0.254545	0.085106	0.25	0.125	0.244444	0.225	0.22449	0.14	0.042553	0.320755	0.236364	0.207547	0.136364	0.25	0.340909	0.234043	0.254545	0.227273	0.3	0.208333	0.122807	0.208333	0.196429	0.282609	0.192308	0.183673	0.173913	0.047619	0.325581	0.204082	0.166667
0.192308	0.16129	0.146341	0.1	0.25	0.175	0.571429	0.72	0.263158	0.151515	0.146341	0.257143	0.106383	0.535714	0.244444	0.242424	0.241379	0.155556	0.228571	0.285714	0.241379	0.285714	0.114286	0.28125	0.31746	0.25	0.05	0.096774	0.25	0.394737	0.361111	0.129032	0.212121	0.257143	0.228571	0.148936	0.21875	0.26	0.228571	0.225	0.131579	0.268293	0.294118	0.305556	0.102564	0.1625	0.159091	0.166667	0.294118	0.5
0.241379	0.28125	0.155556	0.139535	0.25	0.181818	0.139535	0.2	0.232558	0.194444	0.155556	0.25641	0.117647	0.090909	0.196078	0.179487	0.28125	0.212766	0.170732	0.204082	0.322581	0.25	0.128205	0.15	0.142857	0.162791	0.068182	0.147059	0.2	0.16	0.255814	0.142857	0.125	0.225	0.170732	0.255319	0.189189	0.172414	0.2	0.058824	0.090909	0.1875	0.225	0.130435	0.090909	0.152941	0.056604	0.146341	0.195122	0.152174
0.189189	0.225	0.2	0.14	0.170732	0.176471	0.14	0.142857	0.270833	0.214286	0.2	0.266667	0.203704	0.098039	0.326923	0.255814	0.25641	0.27451	0.333333	0.264151	0.088889	0.208333	0.181818	0.317073	0.246753	0.183673	0.222222	0.093023	0.259259	0.222222	0.215686	0.170732	0.292683	0.266667	0.302326	0.425532	0.238095	0.288136	0.244444	0.148148	0.244444	0.226415	0.163265	0.111111	0.217391	0.191011	0.032258	0.309524	0.23913	0.196078
0.181818	0.347826	0.166667	0.083333	0.578947	0.166667	0.181818	0.225806	0.228571	0.222222	0.166667	0.21875	0.175	0.1875	0.186047	0.44	0.291667	0.27027	0.310345	0.225	0.148148	0.212121	0.259259	0.285714	0.130435	0.333333	0.15625	0.074074	0.219512	0.297297	0.189189	0.2	0.296296	0.3	0.266667	0.225	0.259259	0.208333	0.310345	0.189189	0.310345	0.205128	0.5	0.235294	0.310345	0.142857	0.069767	0.37037	0.21875	0.264706
0.230769	0.48	0.2	0.097561	0.565217	0.2	0.125	0.189189	0.166667	0.181818	0.2	0.184211	0.104167	0.073171	0.14	0.235294	0.37037	0.204545	0.222222	0.145833	0.121212	0.179487	0.142857	0.166667	0.105263	0.210526	0.102564	0.129032	0.166667	0.227273	0.162791	0.125	0.205882	0.216216	0.189189	0.27907	0.142857	0.142857	0.222222	0.086957	0.157895	0.177778	0.285714	0.142857	0.128205	0.119048	0.019608	0.228571	0.153846	0.166667
0.190476	0.428571	0.138889	0.055556	0.705882	0.138889	0.1875	0.233333	0.235294	0.230769	0.138889	0.225806	0.15	0.15625	0.190476	0.458333	0.304348	0.277778	0.321429	0.230769	0.2	0.21875	0.222222	0.25	0.132353	0.3	0.125	0.037037	0.225	0.305556	0.194444	0.208333	0.307692	0.310345	0.233333	0.230769	0.222222	0.1875	0.321429	0.131579	0.275862	0.210526	0.357143	0.205882	0.233333	0.12987	0.046512	0.333333	0.225806	0.235294
0.074074	0.086207	0.027778	0.092308	0.107143	0.057143	0.183333	0.186441	0.25	0.160714	0.027778	0.245614	0.144928	0.111111	0.360656	0.096774	0.086207	0.274194	0.25	0.227273	0.166667	0.358491	0.064516	0.214286	0.375	0.142857	0.045455	0.070175	0.223881	0.111111	0.333333	0.107143	0.098361	0.245614	0.166667	0.157143	0.178571	0.323529	0.147541	0.041096	0.09375	0.274194	0.126984	0.193548	0.09375	0.212121	0.164179	0.131148	0.290909	0.171875
0	0.044444	0.09434	0.1	0.045455	0.115385	0.078431	0.125	0.134615	0	0.09434	0.018519	0.032787	0.173913	0.155172	0.083333	0.044444	0.067797	0.038462	0.140351	0.044444	0.098039	0.111111	0.04	0.236842	0.098039	0.204545	0.184211	0.222222	0.084746	0.153846	0	0.133333	0.1	0.038462	0.048387	0	0.138462	0.08	0.090909	0.102041	0.211538	0.1	0	0.102041	0.083333	0.169811	0.12766	0.1	0.134615
0.08642	0.134146	0.155556	0.086022	0.108434	0.155556	0.134831	0.149425	0.179775	0.117647	0.168539	0.147727	0.184783	0.111111	0.241758	0.152941	0.120482	0.252874	0.162791	0.21978	0.081395	0.146067	0.090909	0.166667	0.261261	0.159091	0.087912	0.083333	0.217391	0.222222	0.12766	0.095238	0.141176	0.202381	0.162791	0.233333	0.156627	0.263158	0.162791	0.164835	0.111111	0.135417	0.16092	0.11828	0.111111	0.666667	0.113402	0.151163	0.16092	0.153846
0.15	0.272727	0.258065	0.125	0.125	0.258065	0.028571	0.09375	0.081081	0.034483	0.258065	0.028571	0.1	0.166667	0.090909	0.178571	0.217391	0.128205	0.129032	0.121951	0	0.027778	0.148148	0.137931	0.071429	0.15625	0.133333	0.238095	0.068182	0.125	0.025	0.038462	0.142857	0.090909	0.129032	0.210526	0.033333	0.037736	0.129032	0.138889	0.129032	0.073171	0.090909	0.026316	0.129032	0.089744	0.02381	0.133333	0.028571	0.081081
0.176471	0.315789	0.241379	0.1	0.090909	0.241379	0	0.066667	0.121212	0	0.241379	0.03125	0.078947	0.185185	0.097561	0.153846	0.315789	0.108108	0.142857	0.131579	0.041667	0.030303	0.12	0.111111	0.074627	0.133333	0.148148	0.277778	0.073171	0.105263	0.055556	0	0.115385	0.064516	0.103448	0.194444	0	0.019608	0.103448	0.117647	0.103448	0.078947	0.064516	0	0.103448	0.078947	0	0.107143	0	0.057143
0.233333	0.235294	0.177778	0.136364	0.171429	0.177778	0.190476	0.195122	0.255814	0.222222	0.177778	0.282051	0.208333	0.139535	0.291667	0.27027	0.3125	0.348837	0.4	0.276596	0.105263	0.243902	0.184211	0.566667	0.219178	0.243902	0.142857	0.142857	0.244898	0.255319	0.222222	0.171429	0.243243	0.470588	0.4	0.463415	0.323529	0.232143	0.289474	0.170213	0.25641	0.183673	0.25	0.177778	0.25641	0.192771	0.055556	0.333333	0.25	0.255814
0.137931	0.225806	0.166667	0.095238	0.321429	0.166667	0.15	0.153846	0.25	0.176471	0.166667	0.179487	0.173913	0.184211	0.208333	0.592593	0.225806	0.285714	0.285714	0.272727	0.117647	0.175	0.171429	0.228571	0.133333	0.342857	0.128205	0.058824	0.295455	0.309524	0.186047	0.15625	0.354839	0.277778	0.285714	0.333333	0.242424	0.25	0.285714	0.186047	0.25	0.2	0.393939	0.225	0.216216	0.202532	0.104167	0.333333	0.179487	0.25
0.142857	0.193548	0.043478	0.097561	0.241379	0.090909	0.25	0.257143	0.441176	0.344828	0.043478	0.451613	0.152174	0.128205	0.461538	0.166667	0.193548	0.292683	0.466667	0.375	0.321429	0.769231	0.111111	0.3125	0.235294	0.210526	0.075	0.129032	0.4	0.148936	0.5625	0.16129	0.171429	0.363636	0.294118	0.25	0.290323	0.333333	0.257143	0.041667	0.128205	0.394737	0.184211	0.2	0.1	0.160494	0.130435	0.228571	0.607143	0.25641
0.142857	0.233333	0.2	0.097561	0.285714	0.170732	0.184211	0.189189	0.225	0.181818	0.2	0.153846	0.204545	0.189189	0.23913	0.615385	0.275862	0.325	0.257143	0.27907	0.121212	0.15	0.212121	0.3125	0.150685	0.314286	0.162162	0.060606	0.191489	0.384615	0.136364	0.125	0.322581	0.25	0.257143	0.309524	0.176471	0.185185	0.294118	0.219512	0.294118	0.177778	0.40625	0.2	0.257143	0.175	0.061224	0.34375	0.153846	0.25641
0.133333	0.21875	0.086957	0.119048	0.407407	0.086957	0.27027	0.243243	0.159091	0.171429	0.086957	0.175	0.170213	0.210526	0.134615	0.294118	0.21875	0.222222	0.243243	0.163265	0.114286	0.170732	0.166667	0.189189	0.194444	0.297297	0.097561	0.027778	0.183673	0.272727	0.209302	0.151515	0.228571	0.236842	0.179487	0.1875	0.2	0.222222	0.243243	0.181818	0.243243	0.170213	0.305556	0.351351	0.210526	0.103448	0.058824	0.285714	0.175	0.275
0.125	0.171429	0.130435	0.088889	0.25	0.155556	0.25641	0.263158	0.472222	0.30303	0.130435	0.361111	0.212766	0.2	0.452381	0.243243	0.205882	0.357143	0.6	0.439024	0.205882	0.612903	0.157895	0.393939	0.257143	0.315789	0.119048	0.181818	0.395349	0.234043	0.5	0.176471	0.216216	0.484848	0.333333	0.340909	0.294118	0.36	0.333333	0.148936	0.2	0.357143	0.25641	0.181818	0.170732	0.195122	0.142857	0.305556	0.53125	0.358974
0.105263	0.175	0.137255	0.1	0.210526	0.137255	0.122449	0.125	0.282609	0.25641	0.137255	0.25	0.235294	0.125	0.288462	0.268293	0.175	0.285714	0.421053	0.354167	0.093023	0.272727	0.219512	0.3	0.189873	0.244444	0.12766	0.046512	0.294118	0.207547	0.22449	0.15	0.186047	0.375	0.255814	0.326531	0.25	0.275862	0.285714	0.153846	0.227273	0.211538	0.195652	0.183673	0.2	0.181818	0.050847	0.325	0.222222	0.18
0.129032	0.212121	0.133333	0.142857	0.258065	0.159091	0.263158	0.342857	0.3	0.2	0.133333	0.230769	0.191489	0.236842	0.276596	0.323529	0.212121	0.272727	0.27027	0.348837	0.212121	0.289474	0.162162	0.25	0.191781	0.361111	0.095238	0.117647	0.282609	0.266667	0.292683	0.21875	0.333333	0.333333	0.342857	0.318182	0.264706	0.313725	0.305556	0.177778	0.205128	0.217391	0.333333	0.214286	0.205128	0.2125	0.170213	0.314286	0.297297	0.268293
0.166667	0.269231	0.189189	0.078947	0.333333	0.189189	0.205882	0.212121	0.25	0.25	0.189189	0.171429	0.195122	0.176471	0.261905	0.727273	0.32	0.361111	0.290323	0.307692	0.137931	0.166667	0.241379	0.357143	0.15942	0.354839	0.147059	0.068966	0.238095	0.388889	0.15	0.142857	0.37037	0.28125	0.290323	0.307692	0.2	0.22449	0.290323	0.210526	0.333333	0.166667	0.464286	0.189189	0.290323	0.168831	0.066667	0.344828	0.171429	0.285714
0.153846	0.296296	0.15	0.02381	0.416667	0.15	0.162162	0.235294	0.424242	0.275862	0.15	0.34375	0.186047	0.076923	0.375	0.37931	0.25	0.342105	0.4	0.292683	0.129032	0.294118	0.1875	0.481481	0.205882	0.222222	0.138889	0.03125	0.384615	0.3	0.230769	0.172414	0.344828	0.30303	0.5	0.358974	0.310345	0.265306	0.3125	0.116279	0.235294	0.243902	0.30303	0.121951	0.2	0.210526	0.020408	0.322581	0.228571	0.205128
0.137931	0.225806	0.088889	0.095238	0.275862	0.088889	0.179487	0.184211	0.388889	0.333333	0.088889	0.352941	0.255814	0.153846	0.318182	0.34375	0.225806	0.384615	0.607143	0.333333	0.151515	0.382353	0.138889	0.433333	0.197183	0.305556	0.1	0.058824	0.295455	0.222222	0.342105	0.193548	0.272727	0.586207	0.40625	0.4	0.413793	0.326531	0.323529	0.108696	0.25	0.227273	0.277778	0.25641	0.216216	0.202532	0.081633	0.375	0.314286	0.219512
0.068966	0.16129	0.119048	0.128205	0.25	0.119048	0.157895	0.194444	0.142857	0.225806	0.119048	0.128205	0.209302	0.264706	0.142857	0.413793	0.16129	0.3	0.228571	0.2	0.125	0.125	0.21875	0.205882	0.152778	0.285714	0.105263	0.0625	0.145833	0.261905	0.195122	0.206897	0.212121	0.257143	0.131579	0.255814	0.147059	0.235294	0.228571	0.195122	0.228571	0.155556	0.419355	0.236842	0.228571	0.120482	0.0625	0.272727	0.157895	0.230769
0.153846	0.206897	0.15	0.102564	0.307692	0.15	0.264706	0.3125	0.382353	0.321429	0.15	0.387097	0.214286	0.166667	0.375	0.212121	0.206897	0.416667	0.555556	0.394737	0.25	0.466667	0.225806	0.481481	0.223881	0.333333	0.138889	0.137931	0.35	0.268293	0.371429	0.172414	0.258065	0.535714	0.354839	0.358974	0.310345	0.319149	0.3125	0.142857	0.2	0.307692	0.264706	0.210526	0.2	0.210526	0.111111	0.322581	0.387097	0.305556
0.227273	0.230769	0.075	0.052632	0.347826	0.075	0.212121	0.21875	0.333333	0.307692	0.075	0.290323	0.2	0.114286	0.3	0.37037	0.230769	0.333333	0.444444	0.351351	0.230769	0.28125	0.25	0.423077	0.161765	0.28125	0.151515	0.034483	0.378378	0.225	0.25	0.291667	0.44	0.37931	0.444444	0.315789	0.458333	0.282609	0.444444	0.097561	0.3	0.230769	0.333333	0.194444	0.258065	0.155844	0.093023	0.461538	0.290323	0.222222
0.121212	0.135135	0.152174	0.086957	0.138889	0.152174	0.25	0.25641	0.2	0.1	0.152174	0.111111	0.137255	0.195122	0.192308	0.205128	0.135135	0.09434	0.113636	0.22449	0.135135	0.214286	0.153846	0.093023	0.141026	0.159091	0.090909	0.176471	0.297872	0.156863	0.170213	0.171429	0.179487	0.190476	0.195122	0.132075	0.184211	0.210526	0.195122	0.122449	0.113636	0.208333	0.190476	0.12766	0.113636	0.207317	0.212766	0.142857	0.190476	0.173913
0.142857	0.233333	0.170732	0.046512	0.384615	0.170732	0.184211	0.222222	0.4	0.344828	0.170732	0.363636	0.204545	0.128205	0.325581	0.4	0.275862	0.472222	0.466667	0.410256	0.121212	0.314286	0.212121	0.448276	0.2	0.314286	0.131579	0.060606	0.4	0.285714	0.25	0.2	0.322581	0.40625	0.419355	0.375	0.333333	0.28	0.333333	0.162791	0.257143	0.232558	0.323529	0.170732	0.222222	0.220779	0.04	0.34375	0.25	0.25641
0.129032	0.176471	0.085106	0.116279	0.258065	0.108696	0.297297	0.305556	0.368421	0.3125	0.108696	0.371429	0.217391	0.175	0.395349	0.216216	0.176471	0.333333	0.566667	0.380952	0.212121	0.53125	0.162162	0.40625	0.26087	0.289474	0.179487	0.151515	0.475	0.23913	0.432432	0.181818	0.294118	0.454545	0.305556	0.318182	0.30303	0.425532	0.342857	0.12766	0.205128	0.333333	0.263158	0.186047	0.175	0.197531	0.122449	0.352941	0.454545	0.333333
0.09375	0.176471	0.545455	0.263158	0.147059	0.7	0.170732	0.205128	0.130435	0.02439	0.5	0.066667	0.076923	0.27027	0.132075	0.153846	0.142857	0.098039	0.119048	0.183673	0.052632	0.065217	0.131579	0.125	0.16	0.25641	0.069767	0.266667	0.134615	0.357143	0.104167	0.054054	0.1	0.116279	0.093023	0.183673	0.04878	0.098361	0.146341	0.358974	0.146341	0.142857	0.230769	0.085106	0.146341	0.141176	0.170213	0.121951	0.090909	0.238095
0.138889	0.179487	0.5	0.125	0.25	0.357143	0.255814	0.261905	0.26087	0.116279	0.425	0.173913	0.127273	0.152174	0.2	0.342105	0.179487	0.215686	0.204545	0.28	0.121951	0.145833	0.139535	0.214286	0.207792	0.25	0.181818	0.073171	0.27451	0.5	0.113208	0.097561	0.351351	0.2	0.261905	0.254902	0.195122	0.237288	0.204545	0.372093	0.204545	0.192308	0.35	0.14	0.177778	0.22619	0.150943	0.268293	0.148936	0.288889
0.137931	0.1875	0.139535	0.095238	0.233333	0.166667	0.243243	0.285714	0.351351	0.142857	0.139535	0.210526	0.102041	0.216216	0.318182	0.228571	0.225806	0.227273	0.285714	0.302326	0.357143	0.342857	0.205882	0.194444	0.164384	0.27027	0.128205	0.2	0.325581	0.25	0.307692	0.088235	0.235294	0.277778	0.216216	0.217391	0.108108	0.226415	0.285714	0.133333	0.216216	0.317073	0.277778	0.195122	0.153846	0.158537	0.12766	0.257143	0.243243	0.315789
0.12	0.178571	0.073171	0.108108	0.185185	0.047619	0.108108	0.142857	0.125	0.206897	0.073171	0.171429	0.53125	0.142857	0.152174	0.1875	0.137931	0.166667	0.25	0.186047	0.137931	0.135135	0.241379	0.1875	0.111111	0.272727	0.114286	0.068966	0.130435	0.111111	0.15	0.684211	0.15625	0.242424	0.212121	0.214286	0.2	0.153846	0.25	0.15	0.176471	0.195122	0.242424	0.189189	0.176471	0.139241	0.090909	0.3	0.205882	0.125
0.111111	0.153846	0.166667	0.06	0.189189	0.166667	0.152174	0.155556	0.295455	0.236842	0.166667	0.292683	0.297872	0.181818	0.326531	0.282051	0.184211	0.418605	0.444444	0.340426	0.184211	0.285714	0.170732	0.351351	0.226667	0.255814	0.133333	0.04878	0.28	0.24	0.26087	0.189189	0.289474	0.394737	0.368421	0.4	0.297297	0.285714	0.268293	0.16	0.238095	0.270833	0.261905	0.191489	0.209302	0.214286	0.071429	0.307692	0.261905	0.266667
0.083333	0.117647	0.114754	0.160714	0.142857	0.133333	0.203704	0.207547	0.254545	0.156863	0.114754	0.160714	0.196721	0.207547	0.222222	0.215686	0.117647	0.216667	0.185185	0.293103	0.1875	0.222222	0.111111	0.148148	0.195402	0.269231	0.067797	0.1	0.245902	0.174603	0.22807	0.142857	0.173077	0.226415	0.163636	0.229508	0.153846	0.253731	0.207547	0.147541	0.142857	0.258621	0.25	0.172414	0.142857	0.266667	0.241379	0.188679	0.25	0.210526
0	0.075	0.5	0.159091	0.135135	0.384615	0.214286	0.219512	0.145833	0.022727	0.588235	0.040816	0.092593	0.315789	0.125	0.142857	0.04878	0.113208	0.111111	0.173077	0.04878	0.083333	0.121951	0.116279	0.168831	0.238095	0.065217	0.171429	0.127273	0.395349	0.142857	0.076923	0.093023	0.133333	0.111111	0.12963	0.045455	0.129032	0.136364	0.75	0.162791	0.18	0.214286	0.125	0.162791	0.190476	0.208333	0.113636	0.108696	0.27907
0.097561	0.111111	0.070175	0.137255	0.166667	0.089286	0.234043	0.266667	0.409091	0.238095	0.070175	0.26087	0.157895	0.23913	0.372549	0.25	0.190476	0.222222	0.295455	0.416667	0.190476	0.372093	0.177778	0.27907	0.276316	0.255319	0.12	0.116279	0.38	0.175439	0.4	0.166667	0.227273	0.26087	0.266667	0.283019	0.261905	0.305085	0.266667	0.105263	0.1875	0.404255	0.208333	0.196078	0.1875	0.175824	0.25	0.217391	0.288889	0.265306
0.170732	0.204545	0.142857	0.089286	0.209302	0.142857	0.12963	0.132075	0.326531	0.222222	0.142857	0.297872	0.232143	0.090909	0.377358	0.26087	0.232558	0.38	0.538462	0.339623	0.12766	0.291667	0.12	0.348837	0.333333	0.215686	0.092593	0.085106	0.309091	0.186441	0.245283	0.130435	0.23913	0.386364	0.276596	0.392157	0.272727	0.37931	0.25	0.1	0.176471	0.210526	0.196078	0.142857	0.153846	0.27907	0.0625	0.255319	0.244898	0.181818
0.4	0.181818	0.088235	0.133333	0.25	0.121212	0.36	0.375	0.225806	0.217391	0.088235	0.259259	0.105263	0.137931	0.210526	0.192308	0.181818	0.135135	0.178571	0.189189	0.3	0.296296	0.16	0.24	0.140625	0.206897	0.066667	0.142857	0.216216	0.194444	0.258065	0.190476	0.2	0.259259	0.222222	0.128205	0.318182	0.204545	0.222222	0.083333	0.137931	0.235294	0.259259	0.193548	0.1	0.106667	0.108108	0.185185	0.307692	0.310345
0.052632	0.089744	0.103448	0.021978	0.12	0.090909	0.081395	0.082353	0.127907	0.115385	0.116279	0.134146	0.16092	0.069767	0.206897	0.168831	0.089744	0.364865	0.194805	0.183908	0.075949	0.146341	0.08642	0.184211	0.211009	0.119048	0.05814	0.024691	0.155556	0.172414	0.126437	0.090909	0.126582	0.207792	0.15	0.183908	0.128205	0.230769	0.135802	0.126437	0.135802	0.122222	0.192308	0.103448	0.121951	0.213675	0.020408	0.151899	0.148148	0.114943
0.072917	0.113402	0.144231	0.06422	0.080808	0.11215	0.104762	0.105769	0.176471	0.1	0.15534	0.126214	0.117117	0.084906	0.207547	0.153061	0.113402	0.203883	0.15	0.2	0.069307	0.135922	0.07767	0.141414	0.24	0.125	0.106796	0.070707	0.198113	0.168224	0.12037	0.080808	0.131313	0.16	0.138614	0.2	0.132653	0.238532	0.138614	0.130841	0.095238	0.117117	0.115385	0.081818	0.095238	0.299213	0.069565	0.151515	0.137255	0.132075
0.137931	0.225806	0.195122	0.095238	0.275862	0.195122	0.243243	0.25	0.315789	0.176471	0.195122	0.210526	0.148936	0.216216	0.288889	0.535714	0.266667	0.317073	0.25	0.365854	0.1875	0.205128	0.171429	0.30303	0.197183	0.305556	0.128205	0.125	0.266667	0.410256	0.186047	0.121212	0.3125	0.314286	0.216216	0.244444	0.171429	0.226415	0.323529	0.214286	0.25	0.227273	0.4375	0.166667	0.216216	0.17284	0.081633	0.294118	0.210526	0.315789
0.125	0.142857	0.102564	0.081081	0.192308	0.102564	0.111111	0.114286	0.128205	0.133333	0.102564	0.142857	0.2	0.181818	0.181818	0.233333	0.185185	0.170732	0.21875	0.162791	0.142857	0.138889	0.944444	0.193548	0.128571	0.171429	0.266667	0.071429	0.186047	0.166667	0.153846	0.24	0.241379	0.142857	0.181818	0.162791	0.129032	0.134615	0.258065	0.125	0.392857	0.170732	0.176471	0.131579	0.392857	0.098765	0.068182	0.310345	0.142857	0.157895
0.208333	0.133333	0.071429	0.076923	0.222222	0.097561	0.3125	0.366667	0.483871	0.285714	0.071429	0.4	0.111111	0.138889	0.421053	0.181818	0.214286	0.25	0.322581	0.333333	0.214286	0.592593	0.088235	0.56	0.246154	0.194444	0.081081	0.142857	0.358974	0.186047	0.424242	0.137931	0.1875	0.448276	0.413793	0.268293	0.423077	0.270833	0.242424	0.044444	0.108108	0.282051	0.2	0.153846	0.108108	0.197368	0.113636	0.212121	0.5	0.314286
0.230769	0.321429	0.142857	0.071429	0.241379	0.142857	0.125	0.157895	0.4	0.21875	0.142857	0.323529	0.152174	0.1	0.357143	0.272727	0.48	0.261905	0.375	0.27907	0.15625	0.277778	0.176471	0.4	0.217391	0.179487	0.264706	0.166667	0.435897	0.173913	0.25	0.125	0.413793	0.285714	0.375	0.375	0.25	0.28	0.257143	0.06383	0.189189	0.232558	0.184211	0.090909	0.189189	0.13253	0	0.34375	0.184211	0.166667
0.138889	0.210526	0.075472	0.038462	0.184211	0.117647	0.255814	0.292683	0.414634	0.230769	0.075472	0.35	0.169811	0.152174	0.466667	0.214286	0.179487	0.347826	0.292683	0.361702	0.15	0.375	0.113636	0.378378	0.347826	0.222222	0.130435	0.157895	0.382979	0.188679	0.372093	0.097561	0.219512	0.317073	0.358974	0.306122	0.324324	0.377358	0.232558	0.072727	0.12766	0.319149	0.173913	0.117647	0.104167	0.303797	0.12963	0.181818	0.317073	0.26087
0.185185	0.193548	0.116279	0.071429	0.2	0.142857	0.25	0.294118	0.633333	0.21875	0.116279	0.323529	0.12766	0.128205	0.425	0.235294	0.233333	0.325	0.375	0.375	0.193548	0.4375	0.111111	0.5	0.272727	0.277778	0.131579	0.25	0.4	0.255814	0.388889	0.090909	0.242424	0.451613	0.419355	0.309524	0.333333	0.28	0.257143	0.136364	0.128205	0.292683	0.25	0.116279	0.128205	0.236842	0.083333	0.228571	0.363636	0.4
0.148148	0.333333	0.175	0.023256	0.458333	0.175	0.157895	0.194444	0.411765	0.310345	0.175	0.375	0.209302	0.131579	0.4	0.413793	0.285714	0.333333	0.433333	0.35	0.125	0.323529	0.21875	0.413793	0.202899	0.285714	0.166667	0.0625	0.410256	0.325	0.25641	0.166667	0.333333	0.375	0.387097	0.384615	0.3	0.285714	0.34375	0.166667	0.264706	0.268293	0.333333	0.146341	0.228571	0.207792	0.02	0.4	0.257143	0.230769
0.122449	0.25	0.267857	0.0625	0.229167	0.290909	0.172414	0.196429	0.241379	0.169811	0.267857	0.214286	0.134328	0.135593	0.25	0.25	0.2	0.245902	0.240741	0.278689	0.071429	0.189655	0.125	0.226415	0.202247	0.210526	0.1	0.074074	0.274194	0.327586	0.15873	0.092593	0.185185	0.214286	0.196429	0.322034	0.166667	0.225352	0.196429	0.196721	0.155172	0.1875	0.236364	0.092308	0.135593	0.271739	0.056338	0.222222	0.152542	0.180328
0.171429	0.352941	0.23913	0.08	0.323529	0.23913	0.125	0.152174	0.318182	0.230769	0.23913	0.285714	0.169811	0.104167	0.32	0.307692	0.277778	0.319149	0.325	0.28	0.095238	0.25	0.166667	0.307692	0.192308	0.222222	0.130435	0.1	0.326531	0.285714	0.204082	0.125	0.25	0.285714	0.292683	0.422222	0.225	0.237288	0.261905	0.134615	0.204545	0.215686	0.255814	0.117647	0.177778	0.211765	0.016667	0.3	0.2	0.183673
0.15	0.166667	0.181818	0.2	0	0.181818	0.125	0.09375	0.081081	0	0.181818	0.028571	0.023256	0.09375	0.066667	0.03125	0.166667	0	0	0.121951	0.076923	0.057143	0	0	0.056338	0.121212	0.030303	0.3	0.068182	0.071429	0.051282	0	0	0.058824	0	0.069767	0	0.057692	0.060606	0.078947	0.029412	0.073171	0.090909	0.054054	0.029412	0.036585	0.131579	0	0.058824	0.081081
0.15	0.166667	0.114286	0.028571	0.227273	0.083333	0.090909	0.129032	0.176471	0.25	0.114286	0.2	0.333333	0.09375	0.170732	0.137931	0.12	0.222222	0.25	0.15	0.166667	0.15625	0.291667	0.178571	0.086957	0.233333	0.133333	0.04	0.146341	0.097561	0.205882	0.6875	0.185185	0.2	0.206897	0.210526	0.192308	0.122449	0.25	0.108108	0.129032	0.222222	0.2	0.114286	0.129032	0.103896	0.04878	0.259259	0.241379	0.111111
0.148936	0.204082	0.147541	0.080645	0.183673	0.147541	0.116667	0.137931	0.290909	0.196078	0.147541	0.264151	0.190476	0.1	0.362069	0.207547	0.204082	0.339286	0.466667	0.241935	0.113208	0.259259	0.107143	0.333333	0.325	0.192982	0.083333	0.075472	0.238095	0.206349	0.220339	0.115385	0.166667	0.34	0.245283	0.327586	0.192308	0.283582	0.2	0.107692	0.157895	0.190476	0.196429	0.129032	0.137931	0.26087	0.027778	0.203704	0.218182	0.163934
0.21875	0.257143	0.222222	0.130435	0.194444	0.195652	0.130435	0.159091	0.302326	0.243243	0.222222	0.3	0.2	0.085106	0.361702	0.25641	0.294118	0.304348	0.342105	0.265306	0.1	0.232558	0.205128	0.324324	0.197368	0.177778	0.162791	0.105263	0.235294	0.22	0.23913	0.162162	0.263158	0.268293	0.342105	0.44186	0.236842	0.245614	0.243902	0.14	0.243902	0.22449	0.155556	0.1	0.214286	0.188235	0.017241	0.25	0.238095	0.217391
0.210526	0.217391	0.026316	0.058824	0.227273	0.026316	0.125	0.129032	0.176471	0.2	0.026316	0.16129	0.128205	0.029412	0.170732	0.222222	0.272727	0.189189	0.206897	0.210526	0.4	0.193548	0.192308	0.137931	0.071429	0.15625	0.214286	0.04	0.146341	0.125	0.171429	0.173913	0.185185	0.16129	0.129032	0.121951	0.148148	0.122449	0.166667	0.025	0.166667	0.128205	0.241379	0.147059	0.166667	0.089744	0	0.214286	0.16129	0.111111
0.181818	0.409091	0.135135	0.083333	0.578947	0.135135	0.181818	0.225806	0.194444	0.222222	0.135135	0.21875	0.146341	0.151515	0.186047	0.44	0.24	0.27027	0.310345	0.225	0.148148	0.212121	0.214286	0.285714	0.130435	0.333333	0.121212	0.035714	0.219512	0.297297	0.222222	0.2	0.296296	0.3	0.266667	0.25641	0.214286	0.208333	0.310345	0.157895	0.266667	0.205128	0.344828	0.235294	0.225806	0.142857	0.069767	0.37037	0.21875	0.228571
0.166667	0.176471	0.085106	0.116279	0.21875	0.085106	0.263158	0.305556	0.3	0.235294	0.085106	0.297297	0.191489	0.236842	0.276596	0.285714	0.212121	0.333333	0.382353	0.26087	0.111111	0.25641	0.131579	0.551724	0.298507	0.25641	0.095238	0.055556	0.229167	0.325581	0.292683	0.147059	0.257143	0.454545	0.424242	0.348837	0.387097	0.313725	0.27027	0.152174	0.236842	0.142857	0.230769	0.275	0.205128	0.2125	0.057692	0.314286	0.230769	0.333333
0.153846	0.206897	0.095238	0.075	0.259259	0.095238	0.30303	0.3125	0.382353	0.321429	0.095238	0.433333	0.186047	0.135135	0.375	0.176471	0.166667	0.378378	0.555556	0.325	0.25	0.571429	0.151515	0.428571	0.223881	0.222222	0.108108	0.137931	0.35	0.209302	0.454545	0.214286	0.181818	0.482759	0.354839	0.292683	0.310345	0.347826	0.3125	0.090909	0.135135	0.307692	0.228571	0.179487	0.135135	0.194805	0.086957	0.242424	0.482759	0.27027
0.096774	0.181818	0.162791	0.068182	0.266667	0.162791	0.205128	0.243243	0.243902	0.171429	0.162791	0.146341	0.122449	0.121951	0.18	0.157895	0.147059	0.145833	0.15	0.1875	0.21875	0.230769	0.105263	0.128205	0.178082	0.230769	0.097561	0.15625	0.208333	0.191489	0.268293	0.151515	0.131579	0.175	0.15	0.117647	0.105263	0.157895	0.210526	0.155556	0.121951	0.341463	0.27027	0.086957	0.095238	0.185185	0.255814	0.153846	0.205128	0.214286
0.2	0.242424	0.181818	0.113636	0.212121	0.181818	0.113636	0.116279	0.204545	0.30303	0.181818	0.225	0.325581	0.116279	0.22	0.179487	0.242424	0.23913	0.297297	0.255319	0.108108	0.219512	0.157895	0.210526	0.142857	0.219512	0.119048	0.114286	0.22449	0.115385	0.227273	0.25	0.184211	0.225	0.2	0.311111	0.189189	0.214286	0.230769	0.102041	0.170732	0.295455	0.166667	0.130435	0.142857	0.139535	0.056604	0.236842	0.225	0.152174
0.2	0.27027	0.16	0.122449	0.210526	0.16	0.145833	0.148936	0.282609	0.289474	0.16	0.309524	0.26	0.125	0.367347	0.268293	0.27027	0.4	0.384615	0.27451	0.119048	0.244444	0.162791	0.368421	0.220779	0.244444	0.12766	0.097561	0.245283	0.207547	0.25	0.179487	0.214286	0.375	0.35	0.666667	0.282051	0.254237	0.255814	0.132075	0.2	0.26	0.25	0.183673	0.173913	0.223529	0.050847	0.292683	0.25	0.204082
0.103448	0.15625	0.142857	0.125	0.241379	0.142857	0.285714	0.294118	0.225	0.21875	0.142857	0.184211	0.152174	0.157895	0.212766	0.2	0.121212	0.177778	0.189189	0.25	0.233333	0.277778	0.111111	0.166667	0.2	0.277778	0.075	0.129032	0.244444	0.2	0.282051	0.241379	0.138889	0.216216	0.157895	0.145833	0.176471	0.207547	0.257143	0.162791	0.157895	0.325	0.285714	0.142857	0.128205	0.175	0.268293	0.194444	0.285714	0.25641
0.125	0.142857	0.387097	0.111111	0.068966	0.34375	0.025641	0.054054	0.073171	0.030303	0.482759	0.025641	0.066667	0.147059	0.083333	0.121212	0.185185	0.116279	0.114286	0.086957	0	0.025	0.129032	0.088235	0.067568	0.138889	0.085714	0.2	0.0625	0.225	0.046512	0.033333	0.125	0.081081	0.114286	0.190476	0.029412	0.035088	0.114286	0.323529	0.147059	0.066667	0.081081	0.02381	0.147059	0.1125	0.021739	0.117647	0.025641	0.128205
0.078431	0.132075	0.092308	0.0625	0.156863	0.075758	0.096774	0.098361	0.180328	0.192308	0.109375	0.192982	0.266667	0.098361	0.269841	0.181818	0.132075	0.310345	0.313725	0.21875	0.090909	0.210526	0.145455	0.25	0.289157	0.189655	0.157895	0.035714	0.234375	0.184615	0.177419	0.134615	0.207547	0.307692	0.196429	0.258065	0.188679	0.318182	0.288462	0.140625	0.218182	0.206349	0.172414	0.163934	0.196429	0.21875	0.041667	0.375	0.192982	0.142857
0.147059	0.222222	0.222222	0	0.34375	0.195652	0.130435	0.186047	0.333333	0.243243	0.27907	0.3	0.132075	0.085106	0.306122	0.289474	0.189189	0.395349	0.378378	0.319149	0.1	0.261905	0.175	0.361111	0.181818	0.204545	0.136364	0.05	0.285714	0.326087	0.23913	0.102564	0.230769	0.3	0.342105	0.265306	0.236842	0.245614	0.214286	0.266667	0.186047	0.176471	0.268293	0.1	0.186047	0.246914	0	0.25	0.209302	0.244444
0.16129	0.138889	0.130435	0.113636	0.176471	0.155556	0.289474	0.297297	0.514286	0.264706	0.130435	0.289474	0.14	0.2	0.418605	0.314286	0.205882	0.295455	0.371429	0.439024	0.171429	0.388889	0.157895	0.393939	0.294118	0.25	0.119048	0.181818	0.395349	0.26087	0.384615	0.142857	0.323529	0.441176	0.411765	0.340909	0.375	0.333333	0.333333	0.148936	0.2	0.295455	0.25641	0.155556	0.170732	0.225	0.191489	0.305556	0.441176	0.394737
0.148148	0.2	0.146341	0.1	0.296296	0.146341	0.157895	0.162162	0.263158	0.266667	0.146341	0.222222	0.209302	0.131579	0.272727	0.322581	0.241379	0.333333	0.387097	0.317073	0.16129	0.216216	0.3	0.322581	0.152778	0.323529	0.2	0.0625	0.27907	0.232558	0.225	0.25	0.333333	0.294118	0.264706	0.285714	0.258065	0.235294	0.387097	0.139535	0.34375	0.209302	0.294118	0.175	0.30303	0.177215	0.040816	0.448276	0.222222	0.2
0.107143	0.2	0.093023	0.1	0.206897	0.119048	0.257143	0.264706	0.333333	0.1875	0.093023	0.222222	0.106383	0.194444	0.302326	0.242424	0.2	0.155556	0.194444	0.542857	0.241379	0.363636	0.114286	0.138889	0.169014	0.25	0.105263	0.172414	0.410256	0.152174	0.324324	0.129032	0.25	0.189189	0.194444	0.148936	0.21875	0.26	0.228571	0.088889	0.131579	0.368421	0.222222	0.119048	0.131579	0.148148	0.214286	0.2	0.294118	0.230769
[truncated: 173 more columns]

## Sheet: target similarity
1	0.282628	0.0834952	0.0723507	0.0735735	0.065125	0.0763494	0.0698001	0.226617	0.149088	0.0572382	0.0818039	0.0729147	0.079477	0.0806902	0.062096	0.0814364	0.0851717	0.0671594	0.0630705	0.0684689	0.0751009	0.101213	0.0809615	0.0963639	0.0884155	0.0836487	0.0587887	0.0836759	0.249562	0.123287	0.125185	0.0231883	0.08653	0.0169028	0.522575	0.0184343	0.0229182	0.0217733	0.0204915	0.015079	0.0158595	0.023224	0.0225352	0.074473	0.112276	0.075312	0.0805252	0.087263	0.0871356
0.282628	1	0.0631499	0.0468767	0.0555507	0.0480711	0.0657263	0.0509348	0.200181	0.183805	0.0394935	0.0892932	0.0727308	0.0945562	0.0692818	0.0595571	0.0807016	0.0938014	0.07077	0.0677922	0.0546303	0.0831235	0.102068	0.0665106	0.0843497	0.0817961	0.0900874	0.060455	0.0644841	0.211748	0.093441	0.0996843	0.0166644	0.0856443	0.0167832	0.251252	0.0204724	0.0181591	0.0307399	0.0163705	0.0163942	0.0162691	0.0191129	0.0162324	0.058535	0.0940627	0.0731642	0.0828705	0.0667435	0.0874402
0.0834952	0.0631499	1	0.244586	0.20797	0.179518	0.212701	0.186053	0.0868206	0.0865155	0.0465964	0.0851767	0.0682376	0.0815225	0.0754082	0.140756	0.127819	0.130268	0.210255	0.197388	0.208992	0.173401	0.12021	0.158227	0.125411	0.174969	0.177091	0.187418	0.115407	0.0766992	0.0550183	0.055483	0.0136074	0.0485305	0.0162013	0.0644935	0.01474	0.0125127	0.0131885	0.0140471	0.0132519	0.0141967	0.0133974	0.0136964	0.174374	0.120322	0.186976	0.162586	0.154668	0.120122
0.0723507	0.0468767	0.244586	1	0.422776	0.453627	0.423692	0.470677	0.0635785	0.0846994	0.0514971	0.106031	0.0846755	0.0820503	0.123352	0.12634	0.133786	0.138251	0.191878	0.183026	0.179744	0.164075	0.141806	0.154601	0.127828	0.174468	0.162774	0.174544	0.11899	0.0893669	0.0543443	0.0593703	0.0136685	0.0612895	0.0124467	0.055331	0.0113683	0.0137586	0.0127944	0.0161496	0.0126868	0.0179959	0.0159712	0.0139872	0.20344	0.139148	0.213669	0.199419	0.171509	0.181079
0.0735735	0.0555507	0.20797	0.422776	1	0.385522	0.558753	0.38622	0.0695704	0.0917171	0.0469713	0.094344	0.0859052	0.0841176	0.101938	0.114093	0.128586	0.141074	0.169426	0.155621	0.160842	0.122277	0.136236	0.118569	0.130645	0.171629	0.160683	0.157707	0.115988	0.0969779	0.0637008	0.0512181	0.0128398	0.0382523	0.0158827	0.0597191	0.0144529	0.0161947	0.0131113	0.0135069	0.0121609	0.0131726	0.0153856	0.0140777	0.210723	0.138562	0.199109	0.169448	0.160652	0.160939
0.065125	0.0480711	0.179518	0.453627	0.385522	1	0.383973	0.469273	0.0671952	0.0802493	0.0562028	0.0884131	0.0873515	0.0813353	0.100226	0.117269	0.114137	0.123802	0.138615	0.12632	0.133604	0.124216	0.136707	0.113656	0.122729	0.152115	0.110643	0.105978	0.112987	0.0955056	0.0471811	0.0546261	0.019788	0.0554974	0.011942	0.05346	0.00892999	0.0135736	0.0116655	0.0158876	0.0113609	0.0115108	0.0136891	0.0154001	0.185252	0.122622	0.159348	0.151396	0.137775	0.149404
0.0763494	0.0657263	0.212701	0.423692	0.558753	0.383973	1	0.407749	0.0686735	0.0920374	0.0514819	0.0969444	0.0922007	0.0944076	0.104148	0.121506	0.127827	0.137035	0.171086	0.162273	0.166755	0.139055	0.135828	0.124419	0.120778	0.189981	0.166198	0.163884	0.109218	0.0887857	0.0632088	0.0563914	0.0149376	0.0411609	0.0152363	0.0622042	0.0150591	0.0143641	0.0138667	0.0135588	0.0142048	0.0167179	0.0138272	0.0138963	0.207387	0.137142	0.197547	0.174277	0.157149	0.153786
0.0698001	0.0509348	0.186053	0.470677	0.38622	0.469273	0.407749	1	0.0622546	0.0817262	0.0493883	0.0909412	0.08715	0.0889116	0.11136	0.111734	0.118411	0.125472	0.148755	0.159471	0.133279	0.125979	0.143474	0.118439	0.127926	0.153712	0.125997	0.120011	0.108704	0.0863697	0.0551884	0.0573816	0.0142811	0.0615108	0.016221	0.0575611	0.0143691	0.0141825	0.0126241	0.0148976	0.0103632	0.0115898	0.0181458	0.0135164	0.200861	0.132957	0.167442	0.146628	0.14092	0.141418
0.226617	0.200181	0.0868206	0.0635785	0.0695704	0.0671952	0.0686735	0.0622546	1	0.162711	0.0660935	0.0806622	0.0707248	0.0942174	0.0818373	0.0648898	0.0684808	0.0924549	0.0784992	0.0793205	0.0871737	0.0812775	0.0915819	0.0868412	0.0786757	0.0670919	0.0688678	0.0488154	0.0810669	0.259655	0.113538	0.126072	0.021025	0.0604366	0.0128207	0.195698	0.0213983	0.0145275	0.0158337	0.018631	0.017424	0.0188736	0.018162	0.0171945	0.0763133	0.128167	0.0785377	0.0769582	0.0769002	0.087183
0.149088	0.183805	0.0865155	0.0846994	0.0917171	0.0802493	0.0920374	0.0817262	0.162711	1	0.0493779	0.119689	0.089135	0.113493	0.090691	0.0803349	0.0775193	0.0953295	0.0715469	0.0716167	0.0645085	0.0938581	0.0912808	0.0991907	0.0800918	0.0949977	0.0978895	0.075293	0.0777667	0.182283	0.0868139	0.0904673	0.0142486	0.0856634	0.0131148	0.136609	0.0122391	0.0129344	0.0150989	0.0161057	0.0147343	0.0176518	0.013732	0.0156948	0.082851	0.104973	0.0839189	0.090803	0.0914208	0.0715188
0.0572382	0.0394935	0.0465964	0.0514971	0.0469713	0.0562028	0.0514819	0.0493883	0.0660935	0.0493779	1	0.107667	0.107853	0.12689	0.119159	0.0932995	0.104727	0.122198	0.0492388	0.0609601	0.0510336	0.0846099	0.10053	0.0783275	0.0963041	0.0561083	0.0596163	0.0454934	0.0856456	0.0642801	0.0619128	0.0648813	0.0160186	0.0526237	0.0136192	0.0654538	0.0166286	0.0213167	0.0147215	0.015537	0.0131487	0.0119732	0.0162725	0.0135897	0.0777316	0.113452	0.0738015	0.103173	0.114735	0.0839805
0.0818039	0.0892932	0.0851767	0.106031	0.094344	0.0884131	0.0969444	0.0909412	0.0806622	0.119689	0.107667	1	0.412193	0.413187	0.477246	0.127617	0.133312	0.14509	0.117543	0.121141	0.100624	0.125018	0.144806	0.142464	0.163141	0.114639	0.117349	0.104639	0.143043	0.1023	0.112438	0.112253	0.0161153	0.0509064	0.013058	0.0955842	0.0169784	0.0176149	0.0170138	0.0149997	0.0181088	0.016533	0.0153195	0.0142963	0.10999	0.190292	0.130922	0.125264	0.111892	0.112058
0.0729147	0.0727308	0.0682376	0.0846755	0.0859052	0.0873515	0.0922007	0.08715	0.0707248	0.089135	0.107853	0.412193	1	0.513952	0.337859	0.141175	0.147475	0.145469	0.0978364	0.0972494	0.0876947	0.14266	0.161736	0.181268	0.150101	0.111838	0.117035	0.103437	0.137668	0.0851385	0.089673	0.084829	0.0154121	0.0669602	0.014332	0.0692642	0.0130714	0.0165161	0.0125411	0.0127435	0.0142626	0.0140821	0.0176065	0.014301	0.10258	0.186498	0.148915	0.127974	0.127215	0.0987955
0.079477	0.0945562	0.0815225	0.0820503	0.0841176	0.0813353	0.0944076	0.0889116	0.0942174	0.113493	0.12689	0.413187	0.513952	1	0.359557	0.133301	0.146787	0.147553	0.111773	0.10919	0.0984263	0.1544	0.192336	0.180923	0.171872	0.123664	0.109959	0.109065	0.15214	0.0981192	0.084067	0.0850898	0.0214354	0.0986925	0.0153542	0.0806443	0.0130653	0.0147209	0.0152389	0.0151714	0.014871	0.01364	0.0182075	0.0152942	0.101087	0.219806	0.122831	0.12864	0.124885	0.11697
0.0806902	0.0692818	0.0754082	0.123352	0.101938	0.100226	0.104148	0.11136	0.0818373	0.090691	0.119159	0.477246	0.337859	0.359557	1	0.125593	0.147505	0.145305	0.0944021	0.0956852	0.0965005	0.120546	0.146879	0.141163	0.145474	0.120834	0.114832	0.094738	0.121386	0.116252	0.122273	0.112746	0.0187734	0.0534853	0.0158559	0.0774584	0.0179077	0.0146281	0.0151645	0.0190243	0.0165953	0.0192599	0.0207667	0.0186141	0.0963297	0.183406	0.141352	0.112873	0.115669	0.120342
0.062096	0.0595571	0.140756	0.12634	0.114093	0.117269	0.121506	0.111734	0.0648898	0.0803349	0.0932995	0.127617	0.141175	0.133301	0.125593	1	0.435374	0.420806	0.176511	0.174358	0.194234	0.219307	0.217144	0.224265	0.207909	0.169487	0.203089	0.163679	0.190623	0.076148	0.0665236	0.0766476	0.0120999	0.0736701	0.0128057	0.077011	0.0129275	0.0149053	0.0136122	0.0126956	0.0186728	0.0119927	0.0117078	0.0111469	0.104213	0.214316	0.225424	0.223374	0.217004	0.200811
0.0814364	0.0807016	0.127819	0.133786	0.128586	0.114137	0.127827	0.118411	0.0684808	0.0775193	0.104727	0.133312	0.147475	0.146787	0.147505	0.435374	1	0.457301	0.191363	0.187603	0.196854	0.217315	0.225239	0.236495	0.217807	0.186629	0.205298	0.155751	0.189438	0.0788545	0.0810224	0.0785342	0.0132826	0.0743817	0.0125411	0.0790784	0.0106909	0.0157898	0.014876	0.0134761	0.0142035	0.0147258	0.0133031	0.0148789	0.101528	0.225615	0.23485	0.237658	0.236853	0.229342
0.0851717	0.0938014	0.130268	0.138251	0.141074	0.123802	0.137035	0.125472	0.0924549	0.0953295	0.122198	0.14509	0.145469	0.147553	0.145305	0.420806	0.457301	1	0.188955	0.190748	0.196096	0.232145	0.245769	0.23647	0.23539	0.185643	0.219614	0.171956	0.21256	0.0967496	0.0818911	0.0884181	0.0152097	0.0900766	0.0130675	0.107372	0.0168933	0.0164989	0.0141403	0.0156396	0.0118396	0.0121104	0.014551	0.0137097	0.12344	0.239436	0.245496	0.268711	0.259234	0.253204
0.0671594	0.07077	0.210255	0.191878	0.169426	0.138615	0.171086	0.148755	0.0784992	0.0715469	0.0492388	0.117543	0.0978364	0.111773	0.0944021	0.176511	0.191363	0.188955	1	0.464913	0.488999	0.207997	0.153991	0.185498	0.176072	0.26323	0.238231	0.246542	0.15748	0.0840229	0.0596987	0.0689474	0.0190304	0.0647876	0.013422	0.05862	0.0184675	0.0185417	0.0154526	0.0167119	0.0220922	0.0159953	0.0156153	0.0154624	0.171782	0.163823	0.255416	0.241561	0.247324	0.223404
0.0630705	0.0677922	0.197388	0.183026	0.155621	0.12632	0.162273	0.159471	0.0793205	0.0716167	0.0609601	0.121141	0.0972494	0.10919	0.0956852	0.174358	0.187603	0.190748	0.464913	1	0.446068	0.167191	0.144572	0.167655	0.151682	0.242633	0.224827	0.24112	0.138126	0.0818818	0.0647644	0.0667142	0.0135409	0.0555371	0.0134351	0.0539097	0.0150697	0.0164454	0.0119523	0.0128326	0.0127814	0.0136563	0.0158603	0.0117814	0.159375	0.153199	0.243442	0.215484	0.225422	0.20376
0.0684689	0.0546303	0.208992	0.179744	0.160842	0.133604	0.166755	0.133279	0.0871737	0.0645085	0.0510336	0.100624	0.0876947	0.0984263	0.0965005	0.194234	0.196854	0.196096	0.488999	0.446068	1	0.186967	0.144011	0.177167	0.169278	0.236745	0.232313	0.240517	0.147306	0.0819332	0.0681711	0.0684195	0.0153172	0.0536036	0.0124908	0.0602761	0.0126095	0.0145094	0.0109721	0.0116415	0.0169757	0.0147761	0.014196	0.0147271	0.171595	0.161494	0.281392	0.238025	0.266492	0.209931
0.0751009	0.0831235	0.173401	0.164075	0.122277	0.124216	0.139055	0.125979	0.0812775	0.0938581	0.0846099	0.125018	0.14266	0.1544	0.120546	0.219307	0.217315	0.232145	0.207997	0.167191	0.186967	1	0.434306	0.423231	0.24984	0.180453	0.194345	0.195125	0.229514	0.0887715	0.0760999	0.0898986	0.0153612	0.102056	0.0162904	0.0658116	0.0132536	0.0139014	0.012276	0.0124479	0.0181053	0.0153025	0.0164997	0.0147894	0.119836	0.236616	0.2177	0.236273	0.225002	0.22441
0.101213	0.102068	0.12021	0.141806	0.136236	0.136707	0.135828	0.143474	0.0915819	0.0912808	0.10053	0.144806	0.161736	0.192336	0.146879	0.217144	0.225239	0.245769	0.153991	0.144572	0.144011	0.434306	1	0.374558	0.275223	0.155156	0.174917	0.122504	0.229817	0.11487	0.0842042	0.0949823	0.014231	0.0841073	0.0131785	0.0898035	0.0156266	0.0135799	0.01798	0.0144499	0.0132195	0.0143523	0.0169102	0.0165091	0.136113	0.26613	0.189478	0.23394	0.245685	0.223809
0.0809615	0.0665106	0.158227	0.154601	0.118569	0.113656	0.124419	0.118439	0.0868412	0.0991907	0.0783275	0.142464	0.181268	0.180923	0.141163	0.224265	0.236495	0.23647	0.185498	0.167655	0.177167	0.423231	0.374558	1	0.234976	0.157497	0.195616	0.200949	0.21518	0.0956989	0.0624889	0.0807616	0.0170399	0.111463	0.016625	0.0813018	0.0155486	0.0127751	0.0142142	0.0119815	0.0150629	0.0160042	0.0132203	0.0132863	0.117354	0.247693	0.211255	0.237234	0.211054	0.201153
0.0963639	0.0843497	0.125411	0.127828	0.130645	0.122729	0.120778	0.127926	0.0786757	0.0800918	0.0963041	0.163141	0.150101	0.171872	0.145474	0.207909	0.217807	0.23539	0.176072	0.151682	0.169278	0.24984	0.275223	0.234976	1	0.175001	0.204839	0.156697	0.528893	0.105881	0.0773437	0.0865379	0.0135858	0.0859037	0.0116553	0.0887078	0.0116892	0.0134276	0.015069	0.0137989	0.0128379	0.0134573	0.0159528	0.0188617	0.106195	0.261482	0.239452	0.252953	0.253781	0.223728
0.0884155	0.0817961	0.174969	0.174468	0.171629	0.152115	0.189981	0.153712	0.0670919	0.0949977	0.0561083	0.114639	0.111838	0.123664	0.120834	0.169487	0.186629	0.185643	0.26323	0.242633	0.236745	0.180453	0.155156	0.157497	0.175001	1	0.454839	0.283056	0.155005	0.0946584	0.075436	0.0745963	0.0144836	0.0600405	0.0193731	0.070924	0.0122712	0.014587	0.015744	0.0191263	0.0146617	0.0222885	0.0194192	0.0190459	0.173742	0.172968	0.248828	0.222591	0.234622	0.206652
0.0836487	0.0900874	0.177091	0.162774	0.160683	0.110643	0.166198	0.125997	0.0688678	0.0978895	0.0596163	0.117349	0.117035	0.109959	0.114832	0.203089	0.205298	0.219614	0.238231	0.224827	0.232313	0.194345	0.174917	0.195616	0.204839	0.454839	1	0.316541	0.171176	0.0824607	0.0814784	0.0717298	0.0125848	0.074177	0.0168527	0.0658487	0.0127461	0.0161662	0.0136068	0.016754	0.0130879	0.0156957	0.0148285	0.0151509	0.148713	0.17831	0.26795	0.238184	0.255249	0.225802
0.0587887	0.060455	0.187418	0.174544	0.157707	0.105978	0.163884	0.120011	0.0488154	0.075293	0.0454934	0.104639	0.103437	0.109065	0.094738	0.163679	0.155751	0.171956	0.246542	0.24112	0.240517	0.195125	0.122504	0.200949	0.156697	0.283056	0.316541	1	0.143387	0.0736101	0.0615386	0.0626002	0.0112817	0.0621743	0.0194916	0.054082	0.0156386	0.0182852	0.0172804	0.0161926	0.0195301	0.0204958	0.0138885	0.0139579	0.140037	0.134042	0.246526	0.189359	0.195166	0.184941
0.0836759	0.0644841	0.115407	0.11899	0.115988	0.112987	0.109218	0.108704	0.0810669	0.0777667	0.0856456	0.143043	0.137668	0.15214	0.121386	0.190623	0.189438	0.21256	0.15748	0.138126	0.147306	0.229514	0.229817	0.21518	0.528893	0.155005	0.171176	0.143387	1	0.0867491	0.0752568	0.0807627	0.0115466	0.0757597	0.0110488	0.0730923	0.0120529	0.0159111	0.0154186	0.014411	0.0137401	0.0125292	0.0124539	0.0129631	0.0951947	0.236003	0.209581	0.208826	0.209669	0.188956
0.249562	0.211748	0.0766992	0.0893669	0.0969779	0.0955056	0.0887857	0.0863697	0.259655	0.182283	0.0642801	0.1023	0.0851385	0.0981192	0.116252	0.076148	0.0788545	0.0967496	0.0840229	0.0818818	0.0819332	0.0887715	0.11487	0.0956989	0.105881	0.0946584	0.0824607	0.0736101	0.0867491	1	0.119428	0.128801	0.0198723	0.0699548	0.013776	0.237322	0.0153377	0.0171303	0.0197584	0.0174921	0.0168733	0.0174365	0.0157128	0.0200023	0.0755677	0.143615	0.0839413	0.0891261	0.0893303	0.0900925
0.123287	0.093441	0.0550183	0.0543443	0.0637008	0.0471811	0.0632088	0.0551884	0.113538	0.0868139	0.0619128	0.112438	0.089673	0.084067	0.122273	0.0665236	0.0810224	0.0818911	0.0596987	0.0647644	0.0681711	0.0760999	0.0842042	0.0624889	0.0773437	0.075436	0.0814784	0.0615386	0.0752568	0.119428	1	0.543497	0.0127224	0.0793205	0.0121827	0.123858	0.0099007	0.0130233	0.0137131	0.0134085	0.0112463	0.0125687	0.0169893	0.0206312	0.058408	0.129401	0.0808619	0.0879709	0.0730367	0.0755127
0.125185	0.0996843	0.055483	0.0593703	0.0512181	0.0546261	0.0563914	0.0573816	0.126072	0.0904673	0.0648813	0.112253	0.084829	0.0850898	0.112746	0.0766476	0.0785342	0.0884181	0.0689474	0.0667142	0.0684195	0.0898986	0.0949823	0.0807616	0.0865379	0.0745963	0.0717298	0.0626002	0.0807627	0.128801	0.543497	1	0.0146117	0.111203	0.0122194	0.121931	0.0146199	0.0128206	0.017289	0.015284	0.0123014	0.0135628	0.0148666	0.0165749	0.0587696	0.112732	0.0778877	0.0891171	0.0785029	0.085488
0.0231883	0.0166644	0.0136074	0.0136685	0.0128398	0.019788	0.0149376	0.0142811	0.021025	0.0142486	0.0160186	0.0161153	0.0154121	0.0214354	0.0187734	0.0120999	0.0132826	0.0152097	0.0190304	0.0135409	0.0153172	0.0153612	0.014231	0.0170399	0.0135858	0.0144836	0.0125848	0.0112817	0.0115466	0.0198723	0.0127224	0.0146117	1	0.0160672	0.0292348	0.0217404	0.141661	0.17807	0.188384	0.150562	0.157066	0.156197	0.150377	0.156671	0.01442	0.0209937	0.0126996	0.0153077	0.0197258	0.0132379
0.08653	0.0856443	0.0485305	0.0612895	0.0382523	0.0554974	0.0411609	0.0615108	0.0604366	0.0856634	0.0526237	0.0509064	0.0669602	0.0986925	0.0534853	0.0736701	0.0743817	0.0900766	0.0647876	0.0555371	0.0536036	0.102056	0.0841073	0.111463	0.0859037	0.0600405	0.074177	0.0621743	0.0757597	0.0699548	0.0793205	0.111203	0.0160672	1	0.0149635	0.0832465	0.016198	0.0206836	0.0136724	0.0184732	0.0137727	0.0152349	0.0151167	0.0159273	0.041013	0.103339	0.0619451	0.102969	0.09241	0.0616411
0.0169028	0.0167832	0.0162013	0.0124467	0.0158827	0.011942	0.0152363	0.016221	0.0128207	0.0131148	0.0136192	0.013058	0.014332	0.0153542	0.0158559	0.0128057	0.0125411	0.0130675	0.013422	0.0134351	0.0124908	0.0162904	0.0131785	0.016625	0.0116553	0.0193731	0.0168527	0.0194916	0.0110488	0.013776	0.0121827	0.0122194	0.0292348	0.0149635	1	0.0189385	0.0350025	0.0425438	0.046635	0.0561708	0.0357611	0.049447	0.0500132	0.0526488	0.0125538	0.0151058	0.0116891	0.0122418	0.0144966	0.0124091
0.522575	0.251252	0.0644935	0.055331	0.0597191	0.05346	0.0622042	0.0575611	0.195698	0.136609	0.0654538	0.0955842	0.0692642	0.0806443	0.0774584	0.077011	0.0790784	0.107372	0.05862	0.0539097	0.0602761	0.0658116	0.0898035	0.0813018	0.0887078	0.070924	0.0658487	0.054082	0.0730923	0.237322	0.123858	0.121931	0.0217404	0.0832465	0.0189385	1	0.0181271	0.0182806	0.0195572	0.0162803	0.0167014	0.0140727	0.0152936	0.0143279	0.0602638	0.123702	0.0650907	0.0842084	0.0863737	0.0680219
0.0184343	0.0204724	0.01474	0.0113683	0.0144529	0.00892999	0.0150591	0.0143691	0.0213983	0.0122391	0.0166286	0.0169784	0.0130714	0.0130653	0.0179077	0.0129275	0.0106909	0.0168933	0.0184675	0.0150697	0.0126095	0.0132536	0.0156266	0.0155486	0.0116892	0.0122712	0.0127461	0.0156386	0.0120529	0.0153377	0.0099007	0.0146199	0.141661	0.016198	0.0350025	0.0181271	1	0.345762	0.335068	0.32253	0.595666	0.320924	0.317843	0.315719	0.0174802	0.014474	0.0121673	0.0105456	0.0132326	0.0152256
0.0229182	0.0181591	0.0125127	0.0137586	0.0161947	0.0135736	0.0143641	0.0141825	0.0145275	0.0129344	0.0213167	0.0176149	0.0165161	0.0147209	0.0146281	0.0149053	0.0157898	0.0164989	0.0185417	0.0164454	0.0145094	0.0139014	0.0135799	0.0127751	0.0134276	0.014587	0.0161662	0.0182852	0.0159111	0.0171303	0.0130233	0.0128206	0.17807	0.0206836	0.0425438	0.0182806	0.345762	1	0.696861	0.414858	0.343546	0.422692	0.410324	0.411539	0.0136256	0.0155804	0.0149623	0.013101	0.0141609	0.0143481
0.0217733	0.0307399	0.0131885	0.0127944	0.0131113	0.0116655	0.0138667	0.0126241	0.0158337	0.0150989	0.0147215	0.0170138	0.0125411	0.0152389	0.0151645	0.0136122	0.014876	0.0141403	0.0154526	0.0119523	0.0109721	0.012276	0.01798	0.0142142	0.015069	0.015744	0.0136068	0.0172804	0.0154186	0.0197584	0.0137131	0.017289	0.188384	0.0136724	0.046635	0.0195572	0.335068	0.696861	1	0.412685	0.343874	0.424031	0.413128	0.423848	0.0158576	0.0203656	0.0134575	0.0138376	0.0172653	0.0188189
0.0204915	0.0163705	0.0140471	0.0161496	0.0135069	0.0158876	0.0135588	0.0148976	0.018631	0.0161057	0.015537	0.0149997	0.0127435	0.0151714	0.0190243	0.0126956	0.0134761	0.0156396	0.0167119	0.0128326	0.0116415	0.0124479	0.0144499	0.0119815	0.0137989	0.0191263	0.016754	0.0161926	0.014411	0.0174921	0.0134085	0.015284	0.150562	0.0184732	0.0561708	0.0162803	0.32253	0.414858	0.412685	1	0.322656	0.696997	0.716881	0.768154	0.0139549	0.014673	0.0198576	0.0248056	0.0253228	0.0191785
0.015079	0.0163942	0.0132519	0.0126868	0.0121609	0.0113609	0.0142048	0.0103632	0.017424	0.0147343	0.0131487	0.0181088	0.0142626	0.014871	0.0165953	0.0186728	0.0142035	0.0118396	0.0220922	0.0127814	0.0169757	0.0181053	0.0132195	0.0150629	0.0128379	0.0146617	0.0130879	0.0195301	0.0137401	0.0168733	0.0112463	0.0123014	0.157066	0.0137727	0.0357611	0.0167014	0.595666	0.343546	0.343874	0.322656	1	0.311991	0.320209	0.323969	0.0111781	0.0139185	0.0184279	0.0110916	0.0131345	0.0128493
0.0158595	0.0162691	0.0141967	0.0179959	0.0131726	0.0115108	0.0167179	0.0115898	0.0188736	0.0176518	0.0119732	0.016533	0.0140821	0.01364	0.0192599	0.0119927	0.0147258	0.0121104	0.0159953	0.0136563	0.0147761	0.0153025	0.0143523	0.0160042	0.0134573	0.0222885	0.0156957	0.0204958	0.0125292	0.0174365	0.0125687	0.0135628	0.156197	0.0152349	0.049447	0.0140727	0.320924	0.422692	0.424031	0.696997	0.311991	1	0.680673	0.700964	0.0143386	0.0150764	0.0191744	0.0247152	0.0270703	0.0191732
0.023224	0.0191129	0.0133974	0.0159712	0.0153856	0.0136891	0.0138272	0.0181458	0.018162	0.013732	0.0162725	0.0153195	0.0176065	0.0182075	0.0207667	0.0117078	0.0133031	0.014551	0.0156153	0.0158603	0.014196	0.0164997	0.0169102	0.0132203	0.0159528	0.0194192	0.0148285	0.0138885	0.0124539	0.0157128	0.0169893	0.0148666	0.150377	0.0151167	0.0500132	0.0152936	0.317843	0.410324	0.413128	0.716881	0.320209	0.680673	1	0.758439	0.0142201	0.0155067	0.0206387	0.02639	0.0251443	0.0184577
0.0225352	0.0162324	0.0136964	0.0139872	0.0140777	0.0154001	0.0138963	0.0135164	0.0171945	0.0156948	0.0135897	0.0142963	0.014301	0.0152942	0.0186141	0.0111469	0.0148789	0.0137097	0.0154624	0.0117814	0.0147271	0.0147894	0.0165091	0.0132863	0.0188617	0.0190459	0.0151509	0.0139579	0.0129631	0.0200023	0.0206312	0.0165749	0.156671	0.0159273	0.0526488	0.0143279	0.315719	0.411539	0.423848	0.768154	0.323969	0.700964	0.758439	1	0.0145144	0.0142634	0.0207418	0.0212174	0.0288798	0.0198562
0.074473	0.058535	0.174374	0.20344	0.210723	0.185252	0.207387	0.200861	0.0763133	0.082851	0.0777316	0.10999	0.10258	0.101087	0.0963297	0.104213	0.101528	0.12344	0.171782	0.159375	0.171595	0.119836	0.136113	0.117354	0.106195	0.173742	0.148713	0.140037	0.0951947	0.0755677	0.058408	0.0587696	0.01442	0.041013	0.0125538	0.0602638	0.0174802	0.0136256	0.0158576	0.0139549	0.0111781	0.0143386	0.0142201	0.0145144	1	0.14557	0.181493	0.182514	0.172635	0.175273
0.112276	0.0940627	0.120322	0.139148	0.138562	0.122622	0.137142	0.132957	0.128167	0.104973	0.113452	0.190292	0.186498	0.219806	0.183406	0.214316	0.225615	0.239436	0.163823	0.153199	0.161494	0.236616	0.26613	0.247693	0.261482	0.172968	0.17831	0.134042	0.236003	0.143615	0.129401	0.112732	0.0209937	0.103339	0.0151058	0.123702	0.014474	0.0155804	0.0203656	0.014673	0.0139185	0.0150764	0.0155067	0.0142634	0.14557	1	0.208475	0.214674	0.230357	0.222469
0.075312	0.0731642	0.186976	0.213669	0.199109	0.159348	0.197547	0.167442	0.0785377	0.0839189	0.0738015	0.130922	0.148915	0.122831	0.141352	0.225424	0.23485	0.245496	0.255416	0.243442	0.281392	0.2177	0.189478	0.211255	0.239452	0.248828	0.26795	0.246526	0.209581	0.0839413	0.0808619	0.0778877	0.0126996	0.0619451	0.0116891	0.0650907	0.0121673	0.0149623	0.0134575	0.0198576	0.0184279	0.0191744	0.0206387	0.0207418	0.181493	0.208475	1	0.370876	0.360039	0.32448
0.0805252	0.0828705	0.162586	0.199419	0.169448	0.151396	0.174277	0.146628	0.0769582	0.090803	0.103173	0.125264	0.127974	0.12864	0.112873	0.223374	0.237658	0.268711	0.241561	0.215484	0.238025	0.236273	0.23394	0.237234	0.252953	0.222591	0.238184	0.189359	0.208826	0.0891261	0.0879709	0.0891171	0.0153077	0.102969	0.0122418	0.0842084	0.0105456	0.013101	0.0138376	0.0248056	0.0110916	0.0247152	0.02639	0.0212174	0.182514	0.214674	0.370876	1	0.619576	0.42669
0.087263	0.0667435	0.154668	0.171509	0.160652	0.137775	0.157149	0.14092	0.0769002	0.0914208	0.114735	0.111892	0.127215	0.124885	0.115669	0.217004	0.236853	0.259234	0.247324	0.225422	0.266492	0.225002	0.245685	0.211054	0.253781	0.234622	0.255249	0.195166	0.209669	0.0893303	0.0730367	0.0785029	0.0197258	0.09241	0.0144966	0.0863737	0.0132326	0.0141609	0.0172653	0.0253228	0.0131345	0.0270703	0.0251443	0.0288798	0.172635	0.230357	0.360039	0.619576	1	0.440925
0.0871356	0.0874402	0.120122	0.181079	0.160939	0.149404	0.153786	0.141418	0.087183	0.0715188	0.0839805	0.112058	0.0987955	0.11697	0.120342	0.200811	0.229342	0.253204	0.223404	0.20376	0.209931	0.22441	0.223809	0.201153	0.223728	0.206652	0.225802	0.184941	0.188956	0.0900925	0.0755127	0.085488	0.0132379	0.0616411	0.0124091	0.0680219	0.0152256	0.0143481	0.0188189	0.0191785	0.0128493	0.0191732	0.0184577	0.0198562	0.175273	0.222469	0.32448	0.42669	0.440925	1
0.0887685	0.0843282	0.133958	0.180699	0.181868	0.139167	0.174062	0.143352	0.0824554	0.0735333	0.0865234	0.123051	0.120111	0.121364	0.101886	0.226687	0.247488	0.26115	0.219865	0.214171	0.231364	0.202736	0.208787	0.200408	0.235924	0.219501	0.243772	0.20118	0.194708	0.0845608	0.0670944	0.0869474	0.0177207	0.0822537	0.016018	0.0712072	0.0143735	0.0122711	0.0149021	0.0153517	0.0115182	0.0179126	0.016443	0.0225581	0.191675	0.236865	0.347359	0.459879	0.447624	0.551268
0.0869485	0.0785328	0.110894	0.112766	0.114147	0.109951	0.11749	0.106418	0.0760432	0.0682549	0.0915294	0.132494	0.126377	0.135082	0.133534	0.156203	0.188394	0.177089	0.136586	0.142904	0.160832	0.190405	0.179608	0.191307	0.186051	0.184223	0.186197	0.175016	0.160622	0.105697	0.0808675	0.0855302	0.0135541	0.099443	0.00986202	0.0756207	0.0140788	0.0145801	0.0133715	0.0116983	0.0119815	0.0157908	0.0121945	0.0131803	0.112018	0.184242	0.184544	0.213203	0.218012	0.229731
0.0845093	0.0685568	0.112453	0.130658	0.114056	0.0891179	0.122154	0.0922143	0.0614789	0.0757702	0.0496616	0.128945	0.108933	0.123122	0.119247	0.144791	0.168159	0.159631	0.133119	0.141011	0.146585	0.160627	0.17369	0.167074	0.170986	0.176121	0.185691	0.179849	0.142062	0.104647	0.0667334	0.0787683	0.0157491	0.0939984	0.0133614	0.0714854	0.0135883	0.0128505	0.0116537	0.0141296	0.0141236	0.0177964	0.014859	0.0163116	0.10473	0.15088	0.192132	0.200864	0.204331	0.202277
0.0757745	0.0856297	0.113674	0.13604	0.112026	0.106085	0.118665	0.110539	0.0747169	0.0699017	0.0787888	0.140479	0.122476	0.125595	0.123693	0.176672	0.190371	0.193615	0.156574	0.156727	0.161018	0.187014	0.181944	0.185836	0.173679	0.200576	0.206935	0.178971	0.162103	0.105343	0.063278	0.0682573	0.0145779	0.0786006	0.0108365	0.0632274	0.012155	0.0139752	0.0125232	0.0136313	0.0128866	0.0137687	0.0129781	0.0139745	0.10966	0.170956	0.197178	0.214748	0.228009	0.234362
0.0839172	0.0731229	0.120555	0.133353	0.121951	0.127835	0.131448	0.121841	0.0939931	0.0788918	0.118916	0.174501	0.181084	0.168785	0.168304	0.199666	0.198098	0.207482	0.156644	0.14031	0.145007	0.231377	0.2599	0.221188	0.268506	0.168881	0.188196	0.13938	0.243673	0.129483	0.097944	0.0907478	0.0175763	0.088182	0.0125593	0.0937501	0.0169049	0.0141908	0.0133977	0.014336	0.0142241	0.0119365	0.0111571	0.0124586	0.127829	0.280356	0.202157	0.20021	0.202427	0.206294
0.068941	0.0518183	0.128945	0.123706	0.135925	0.116349	0.128355	0.110952	0.0726234	0.0829277	0.0908085	0.131208	0.123804	0.126853	0.11074	0.204938	0.22613	0.246179	0.19781	0.188416	0.197602	0.194928	0.189106	0.208212	0.227676	0.199288	0.213285	0.175964	0.203342	0.0924186	0.0632111	0.0562653	0.0182152	0.0747021	0.0157406	0.0648658	0.0132134	0.0202442	0.0225861	0.0197462	0.0128815	0.0149498	0.0172008	0.016239	0.12225	0.212486	0.264469	0.29028	0.295509	0.291494
0.0510499	0.0402556	0.14149	0.13582	0.0990572	0.101648	0.0984321	0.114803	0.0533652	0.0561381	0.0774441	0.140426	0.124153	0.128948	0.123879	0.193744	0.193443	0.196151	0.156841	0.146087	0.167249	0.235003	0.201814	0.237789	0.24119	0.144323	0.17697	0.160099	0.200498	0.0877372	0.0746433	0.0657993	0.0146949	0.0806341	0.0152474	0.0637351	0.0153158	0.0183853	0.0119092	0.0163026	0.0171138	0.0177081	0.0207915	0.0173737	0.115014	0.227882	0.175641	0.198764	0.212501	0.19849
0.0823976	0.0661666	0.125435	0.134984	0.132248	0.121461	0.137345	0.123248	0.0812476	0.0742617	0.0848278	0.133307	0.154408	0.179803	0.134346	0.221316	0.244377	0.249852	0.161454	0.167852	0.172109	0.221448	0.204369	0.215715	0.224283	0.195258	0.219674	0.189725	0.190047	0.103663	0.0913808	0.0965975	0.0201681	0.0763049	0.0149274	0.0751963	0.0111624	0.0206451	0.0139663	0.0196742	0.013115	0.0204529	0.0155557	0.0158667	0.10732	0.227605	0.257553	0.267218	0.275357	0.270453
0.196207	0.1928	0.0673331	0.0604295	0.0503839	0.0547544	0.0525763	0.0618944	0.164593	0.10465	0.0660902	0.0788855	0.0706831	0.0711237	0.0809241	0.0650241	0.0672533	0.0876541	0.0651392	0.057998	0.0635144	0.0625492	0.0984347	0.0730808	0.0977987	0.0608675	0.0809496	0.048328	0.0749342	0.153497	0.0843144	0.0968358	0.0152538	0.0821539	0.0181069	0.199057	0.0195866	0.0145736	0.0205087	0.0134535	0.0215744	0.0127801	0.0155319	0.01433	0.0525802	0.0902059	0.0740925	0.0523873	0.0611196	0.061113
0.220932	0.201349	0.0803764	0.0593583	0.0683304	0.0604635	0.0751896	0.0652584	0.2859	0.158488	0.064471	0.100083	0.088238	0.104724	0.102213	0.0901749	0.111992	0.120519	0.0922273	0.094186	0.0882361	0.083749	0.0946653	0.0867668	0.104139	0.072282	0.0815762	0.075021	0.0867865	0.263583	0.135438	0.135596	0.0182001	0.0971303	0.0211025	0.215799	0.0187051	0.0175505	0.0185849	0.0150118	0.0135237	0.0135303	0.0153222	0.0135403	0.0531082	0.143592	0.0792142	0.0890901	0.106384	0.0849645
0.11681	0.109914	0.0969441	0.0861066	0.0933876	0.0860812	0.0921837	0.0882062	0.125456	0.104682	0.0902237	0.146852	0.140457	0.150743	0.143799	0.117278	0.129143	0.125009	0.109824	0.118531	0.109504	0.112076	0.134789	0.14311	0.11029	0.130544	0.116186	0.0938165	0.11685	0.147397	0.109011	0.130364	0.0176802	0.0793241	0.0162199	0.121439	0.0180201	0.0156672	0.014551	0.0192339	0.0137628	0.0200335	0.0174432	0.0193895	0.0943348	0.16332	0.100719	0.123063	0.108099	0.127713
0.200516	0.186948	0.100032	0.0873089	0.0932981	0.0785059	0.0913815	0.0961469	0.198132	0.161125	0.0779584	0.101236	0.129514	0.148069	0.114901	0.120001	0.125357	0.140708	0.107763	0.0980948	0.119709	0.116924	0.151788	0.14081	0.127086	0.0932154	0.0965184	0.0963808	0.122925	0.216097	0.136	0.144125	0.0160937	0.103284	0.0129603	0.184506	0.0158791	0.0188278	0.0151297	0.0170893	0.0151298	0.0141521	0.0138159	0.0149134	0.0983199	0.168038	0.0937237	0.128236	0.134142	0.0957961
0.211137	0.199926	0.0967447	0.0930729	0.0951052	0.0900261	0.0970556	0.100712	0.224993	0.171882	0.0827879	0.122242	0.120917	0.13582	0.10836	0.116728	0.125278	0.13735	0.0983231	0.0998505	0.111228	0.103453	0.134277	0.120134	0.134418	0.104549	0.0961984	0.0806324	0.119806	0.238122	0.145486	0.155518	0.0121235	0.105155	0.0140461	0.208252	0.0154787	0.0168055	0.0172801	0.0204269	0.0156288	0.0181383	0.0126481	0.0165246	0.104129	0.175143	0.0982704	0.140093	0.124239	0.0987623
0.204746	0.197532	0.0847483	0.0892218	0.0932663	0.0876093	0.0958286	0.0963739	0.201888	0.153263	0.0872025	0.118128	0.11398	0.128836	0.109317	0.111644	0.131852	0.141774	0.111642	0.105851	0.118232	0.106718	0.152461	0.126296	0.125036	0.10209	0.105973	0.0821009	0.124573	0.221028	0.156045	0.147303	0.0168999	0.0938725	0.0145767	0.201948	0.0177977	0.0172996	0.014506	0.0176076	0.0160217	0.0178404	0.01619	0.0202153	0.11037	0.153571	0.10689	0.143441	0.125126	0.10951
0.249446	0.273258	0.0584362	0.0573596	0.0570046	0.0575029	0.0620042	0.0567068	0.178126	0.169867	0.0434858	0.0713691	0.0709306	0.0601551	0.0599018	0.0688502	0.063102	0.071538	0.0493798	0.0508817	0.0550286	0.0514716	0.0679894	0.0573886	0.0485925	0.0610391	0.059787	0.0558297	0.0436024	0.203722	0.0902877	0.138466	0.0148765	0.0666933	0.0122621	0.248781	0.0143715	0.0149658	0.0217388	0.0171585	0.0160981	0.0173672	0.0133581	0.0149738	0.0590203	0.0797882	0.0770283	0.0651725	0.0778905	0.0633008
0.260392	0.222803	0.060373	0.0585685	0.0603765	0.0479974	0.0659459	0.0514788	0.15602	0.150802	0.0352998	0.0863959	0.0652891	0.0731411	0.0637426	0.0552823	0.0614213	0.0820621	0.0503733	0.0450583	0.0409651	0.0388511	0.0544954	0.06619	0.0624115	0.0764389	0.0834345	0.0736107	0.0543199	0.161746	0.107193	0.113475	0.0194327	0.0572775	0.0147737	0.231075	0.0110475	0.0191173	0.0188127	0.0115914	0.0153934	0.0170883	0.0144075	0.0124472	0.0521963	0.0748272	0.0466697	0.0473126	0.0514925	0.0647112
0.269012	0.19818	0.048949	0.0547959	0.05479	0.0394478	0.0533721	0.0459087	0.168575	0.12595	0.0449701	0.0760059	0.0795037	0.0733704	0.0810535	0.0422365	0.0545623	0.0649536	0.0511854	0.0512353	0.0463642	0.0563493	0.0606721	0.0675381	0.0813838	0.0532525	0.0655616	0.0628161	0.0579488	0.212937	0.110006	0.129078	0.0137504	0.0838162	0.0126703	0.247388	0.0142676	0.0169428	0.0148211	0.0142377	0.0153064	0.0164579	0.0127515	0.0148655	0.0477816	0.0948884	0.0647934	0.0639121	0.0596064	0.0718206
0.230808	0.229195	0.052317	0.0780799	0.0656774	0.066542	0.0741993	0.0705856	0.154045	0.154018	0.053804	0.0773361	0.0546262	0.0763754	0.0774788	0.0590851	0.0588841	0.0699128	0.057705	0.0627014	0.055266	0.0622962	0.0666957	0.0727209	0.0632187	0.0661424	0.0845756	0.0696605	0.0617671	0.188331	0.092063	0.106759	0.019041	0.0818261	0.0146526	0.239123	0.0143223	0.0161971	0.0158835	0.017673	0.0120905	0.0145821	0.0188018	0.0159264	0.050691	0.085598	0.073795	0.0610798	0.0610809	0.0773608
0.125588	0.114527	0.0477016	0.0538482	0.0438565	0.0532963	0.0468107	0.0483947	0.10667	0.116225	0.0284692	0.0739084	0.0554244	0.0582294	0.0318088	0.0650606	0.0479746	0.0487171	0.0588319	0.0603169	0.0604384	0.0585087	0.0615154	0.058969	0.0673889	0.0573984	0.0548744	0.0486121	0.0528322	0.0988094	0.0578881	0.0674467	0.0153646	0.0560295	0.0132703	0.132014	0.0119079	0.0159858	0.0146606	0.0183589	0.013582	0.0178301	0.0171542	0.0149581	0.0624438	0.0673348	0.0741526	0.0784396	0.0649366	0.0617588
0.0796375	0.0810969	0.0675602	0.0650642	0.0711942	0.0618498	0.0719339	0.062751	0.0881493	0.0901715	0.0780945	0.0600089	0.0606663	0.0782906	0.0751028	0.0678854	0.0800145	0.0877781	0.0580972	0.0547923	0.0783537	0.0756487	0.0826677	0.0850672	0.0730762	0.0715104	0.0787899	0.0674728	0.0800059	0.0945952	0.0721204	0.0873036	0.0151828	0.0852183	0.015276	0.0917364	0.0118385	0.0123849	0.0145348	0.0127908	0.0146795	0.012169	0.0140182	0.0148045	0.0526388	0.0787934	0.0687874	0.0885801	0.0990572	0.0737546
0.0555302	0.0724195	0.0643089	0.0392546	0.0420228	0.039626	0.0428992	0.039734	0.0757515	0.114549	0.0724113	0.0603301	0.0701653	0.077783	0.0658395	0.0597545	0.0654415	0.0871242	0.0549529	0.0668706	0.049063	0.0882316	0.0801025	0.0992524	0.0777897	0.0556232	0.0637805	0.0622228	0.0949598	0.0692228	0.0771344	0.0744806	0.0139548	0.0899988	0.0118822	0.0745992	0.0131058	0.0155835	0.014768	0.0154534	0.0118872	0.0148371	0.0152469	0.0135353	0.0535182	0.0768719	0.0566787	0.0853039	0.0983192	0.0752227
0.0965821	0.112192	0.0564212	0.0574715	0.0543377	0.0502175	0.058828	0.0498629	0.110906	0.327196	0.0325393	0.0463563	0.04492	0.0518578	0.0454121	0.0536198	0.0514268	0.0593526	0.0427691	0.0536889	0.0475383	0.0728431	0.0608506	0.0961412	0.0504983	0.04429	0.0558389	0.0650448	0.0492284	0.126734	0.0547541	0.0748243	0.0133729	0.0937986	0.0132889	0.0878498	0.0112742	0.0202803	0.0146672	0.0202759	0.012697	0.0160061	0.0148817	0.0159531	0.0498619	0.0802467	0.073273	0.0709826	0.0599287	0.0674679
0.255768	0.329721	0.0707312	0.0604742	0.0544387	0.0591995	0.0503784	0.061152	0.216232	0.138301	0.0384859	0.084668	0.079412	0.10424	0.098868	0.0618808	0.0632293	0.0782286	0.0453656	0.0529782	0.0459876	0.0653387	0.0930621	0.069646	0.0838094	0.0573913	0.0858486	0.0620054	0.0688306	0.208667	0.105273	0.105164	0.0154895	0.072251	0.0122462	0.263299	0.0184708	0.0161292	0.0177259	0.0127992	0.0122759	0.014521	0.0165832	0.0147844	0.0526732	0.120719	0.0549167	0.0707542	0.0646264	0.0415141
0.253498	0.246381	0.0642938	0.0500578	0.0485018	0.0545275	0.0541859	0.0531285	0.192642	0.112858	0.0491581	0.0689771	0.0702908	0.091213	0.0684622	0.047082	0.0526962	0.0696119	0.0473739	0.0523126	0.0472361	0.0547601	0.0636803	0.0527365	0.0622259	0.0628241	0.0635291	0.0551148	0.0549824	0.203669	0.0703142	0.0688394	0.0180609	0.0622757	0.0139933	0.222391	0.014882	0.0176724	0.0214261	0.0198895	0.0166698	0.0149867	0.0223449	0.0224565	0.0509305	0.100696	0.0530452	0.0555536	0.0533513	0.0681031
0.0226147	0.0327022	0.0280609	0.0295406	0.0304659	0.0382104	0.0358704	0.0249101	0.0576409	0.0529378	0.0498231	0.0362936	0.0485754	0.0721072	0.0363343	0.0420247	0.0322392	0.0519691	0.0245929	0.0249843	0.0245214	0.0313634	0.0405449	0.0633954	0.0419992	0.0325364	0.0379238	0.0443999	0.0380363	0.046046	0.0271564	0.0219068	0.0155578	0.0237734	0.0136611	0.0472344	0.0147558	0.0175184	0.0150924	0.0150162	0.0135236	0.015163	0.0158415	0.0133107	0.0351603	0.03823	0.054855	0.0313358	0.0270678	0.0519427
0.029138	0.0391785	0.0420225	0.0287095	0.02054	0.0250896	0.0333339	0.0190949	0.0339189	0.0612301	0.0687971	0.0431319	0.0471682	0.0465545	0.036163	0.0538709	0.0471669	0.0575624	0.0449095	0.0515744	0.0489444	0.0628734	0.0457794	0.0936527	0.0480143	0.0297949	0.0382168	0.0314048	0.0498986	0.0281884	0.0200327	0.0228904	0.0115587	0.0458349	0.0131968	0.0290803	0.0144257	0.01586	0.0138121	0.0132598	0.012609	0.017409	0.013547	0.0131196	0.0272845	0.0322746	0.0422038	0.0582976	0.0575684	0.0630591
0.0275495	0.0382002	0.0365034	0.0360562	0.0314756	0.031629	0.0361872	0.0278841	0.0568767	0.0738123	0.065416	0.0502893	0.067284	0.0652944	0.0638073	0.0480266	0.0394439	0.0681933	0.0407331	0.0481861	0.0387685	0.0618427	0.0681717	0.0674439	0.0586374	0.0509334	0.0510117	0.0372002	0.0563032	0.0409628	0.0289182	0.0367089	0.0154337	0.0342058	0.0173549	0.0476516	0.0125959	0.0139243	0.0133559	0.0177607	0.0143368	0.0139551	0.0133616	0.015798	0.0365458	0.0610302	0.0619183	0.0441766	0.065371	0.0524015
0.0552261	0.0845257	0.0535496	0.0344813	0.0269549	0.0350746	0.0355874	0.0234922	0.0606347	0.0801988	0.0564953	0.0706441	0.062637	0.0673858	0.0642344	0.0379732	0.0362047	0.0353612	0.0360521	0.0428326	0.0349394	0.04253	0.0439521	0.0507864	0.0533539	0.0394783	0.0438771	0.0493909	0.0492722	0.0530261	0.0654353	0.0616902	0.0126149	0.0432871	0.0118434	0.0711224	0.0104191	0.0136442	0.0155552	0.0125956	0.0113618	0.0151396	0.0116809	0.0119788	0.0475972	0.0528317	0.0485926	0.0438838	0.039152	0.0484428
0.0737961	0.0983547	0.0302479	0.0272954	0.0308132	0.033361	0.0274843	0.0262294	0.0825534	0.0622472	0.0663235	0.0442257	0.0413309	0.0439332	0.0589791	0.0288893	0.0353817	0.0426374	0.0296995	0.0334445	0.0336849	0.0468605	0.040226	0.0260358	0.0489256	0.0412286	0.0415525	0.0338698	0.039908	0.0732433	0.0686648	0.0529503	0.0183577	0.0362637	0.0166314	0.0842311	0.0151536	0.0161074	0.0168713	0.0178059	0.0162279	0.016143	0.0162848	0.0187418	0.0341243	0.0692586	0.0484968	0.0585102	0.0584859	0.0672446
0.0515332	0.0845512	0.0364525	0.0339085	0.0302577	0.0256691	0.0388974	0.0340163	0.0528304	0.0688937	0.0386266	0.0578406	0.0576465	0.0549599	0.0589053	0.0459462	0.0476679	0.0609606	0.0372944	0.0468396	0.040694	0.0454354	0.0388632	0.062239	0.0506809	0.052695	0.0545262	0.0494108	0.0466806	0.0461423	0.0520599	0.0558763	0.0134213	0.0452011	0.0145494	0.0611612	0.0117502	0.014502	0.0142126	0.0134007	0.0134021	0.0165739	0.013442	0.0135091	0.0285956	0.0628188	0.0551535	0.0419735	0.0452073	0.0414238
0.0840459	0.0781077	0.319424	0.161629	0.15346	0.131493	0.135389	0.130802	0.11131	0.0839429	0.0739282	0.105551	0.105715	0.118275	0.103515	0.14614	0.165576	0.161413	0.142473	0.129132	0.138525	0.138681	0.131239	0.112777	0.139036	0.154188	0.176983	0.108265	0.126652	0.0909397	0.0648233	0.0616633	0.0187772	0.0737548	0.0127019	0.0752114	0.0122746	0.0133268	0.0138054	0.0109991	0.012615	0.0123289	0.0122867	0.0131041	0.133052	0.119662	0.163339	0.181924	0.19047	0.155274
0.101588	0.103318	0.0781801	0.0868289	0.0829282	0.0698135	0.0800238	0.0805508	0.133845	0.0915676	0.0909326	0.0925891	0.105456	0.135105	0.087256	0.0811608	0.0875625	0.0909428	0.0635907	0.0591859	0.0671137	0.0718548	0.0899781	0.0945893	0.0809217	0.0837344	0.0780436	0.0682361	0.0806722	0.103903	0.0905627	0.100814	0.0152366	0.0817323	0.016916	0.120055	0.0154094	0.0158659	0.0193143	0.0144263	0.0215966	0.0140144	0.0147339	0.0142786	0.0636873	0.114493	0.0730634	0.0871007	0.0826845	0.0623072
0.215611	0.190752	0.0499814	0.0535146	0.0587917	0.0485967	0.0486735	0.0419612	0.163039	0.107183	0.0492135	0.0713933	0.063342	0.0601484	0.076483	0.0580149	0.0793876	0.0687241	0.0508264	0.0668222	0.0525696	0.0530337	0.0642424	0.0484376	0.0937751	0.055263	0.0608241	0.0462696	0.0653857	0.189029	0.1255	0.101677	0.0284023	0.0418836	0.0248351	0.196096	0.0182975	0.0159084	0.0166902	0.0243456	0.0118429	0.0134696	0.0236156	0.025082	0.0539491	0.0968092	0.074126	0.0631013	0.0529746	0.0614044
0.193785	0.187936	0.0827722	0.091978	0.0844153	0.0912014	0.086128	0.0840815	0.203277	0.178829	0.0729235	0.13014	0.112502	0.126341	0.120933	0.140225	0.134883	0.16189	0.109598	0.0972788	0.104682	0.118125	0.159325	0.124745	0.128998	0.0972099	0.103447	0.0923511	0.11301	0.231773	0.132298	0.144949	0.0155345	0.0997967	0.0185787	0.192979	0.0146971	0.014876	0.0145837	0.0150104	0.0159471	0.0143949	0.0127981	0.011601	0.100896	0.178618	0.0897024	0.118013	0.133155	0.112028
0.213272	0.189366	0.0889649	0.0864225	0.0972149	0.0806422	0.0876642	0.0859583	0.194795	0.202692	0.0791529	0.127131	0.122064	0.137102	0.139795	0.125855	0.135569	0.172239	0.109275	0.122917	0.103127	0.132362	0.1634	0.125859	0.144867	0.112081	0.108559	0.0846688	0.139098	0.228399	0.130312	0.143811	0.0175559	0.0970101	0.0191435	0.19472	0.0169522	0.0153283	0.0152907	0.0141778	0.0166601	0.0145676	0.0139629	0.0163714	0.0979519	0.173172	0.109235	0.1396	0.14292	0.134052
0.161458	0.151219	0.0933699	0.0837494	0.090434	0.0783366	0.0885944	0.0732848	0.183065	0.208872	0.0688007	0.130905	0.13405	0.128828	0.102176	0.129728	0.112878	0.144612	0.104426	0.105552	0.10208	0.120281	0.124933	0.150743	0.122023	0.0945733	0.0914513	0.0906044	0.117325	0.219886	0.112913	0.11875	0.0139822	0.103628	0.0181106	0.155242	0.0166735	0.0150532	0.0172319	0.0122758	0.014491	0.0163232	0.0123137	0.013831	0.0845294	0.138657	0.0884467	0.104208	0.121632	0.0849937
0.191535	0.16611	0.0983377	0.106228	0.107648	0.0840496	0.103007	0.082714	0.209427	0.21466	0.0873395	0.149612	0.119984	0.140823	0.118577	0.139844	0.120768	0.154433	0.116069	0.102255	0.120112	0.131186	0.154074	0.147172	0.145884	0.121242	0.115459	0.103217	0.134392	0.21922	0.125663	0.143337	0.0186231	0.104965	0.0126178	0.173176	0.0142663	0.0182692	0.0153191	0.0147206	0.0130328	0.0137986	0.014507	0.0153604	0.100614	0.168884	0.101402	0.125433	0.137458	0.0986535
0.0569551	0.0622957	0.0424601	0.0475569	0.0358043	0.0435927	0.0517119	0.0409933	0.0596162	0.0795442	0.070341	0.0579184	0.062543	0.0664556	0.0842866	0.0627022	0.0584574	0.0675403	0.0346736	0.0347074	0.0360759	0.0541599	0.0440094	0.0670653	0.0435088	0.0353275	0.0360999	0.0359301	0.0518296	0.0704885	0.0402761	0.0602363	0.0130458	0.0656268	0.0129879	0.0587094	0.0172487	0.0204403	0.0198464	0.0164816	0.0148271	0.0161153	0.015999	0.0160789	0.042301	0.0681546	0.0476585	0.0470247	0.03832	0.0635735
0.0724886	0.0941632	0.0719394	0.0609069	0.0817347	0.0642587	0.0678138	0.0684511	0.10984	0.0954235	0.0822792	0.125489	0.112857	0.132581	0.120982	0.103045	0.12081	0.132549	0.0792685	0.0708823	0.0797405	0.124174	0.124529	0.118007	0.109056	0.083635	0.0974443	0.0610336	0.0928037	0.116113	0.101001	0.0955088	0.0248875	0.114089	0.0148117	0.0783434	0.0163415	0.0150309	0.0172813	0.0159035	0.01452	0.0137875	0.015454	0.0162827	0.0681758	0.12258	0.0953592	0.121847	0.116909	0.110478
0.187374	0.186914	0.0612829	0.054306	0.0476946	0.0517279	0.0529218	0.0563137	0.160018	0.105316	0.0597631	0.0717482	0.0647191	0.0692138	0.0812603	0.0520025	0.0543232	0.0803116	0.0501316	0.0449533	0.0510271	0.0571269	0.0941224	0.0652289	0.0782455	0.0563975	0.0771829	0.0388991	0.0606875	0.152853	0.0772691	0.100013	0.0145099	0.0779933	0.0158362	0.192166	0.0204543	0.0140978	0.0170768	0.0149787	0.0215223	0.0126152	0.0155175	0.0131196	0.0505268	0.0844718	0.0662162	0.0499149	0.063014	0.0575414
0.0978355	0.112133	0.0948582	0.092017	0.0932884	0.0799944	0.0867475	0.0845253	0.106931	0.118499	0.0866977	0.119589	0.0983351	0.133198	0.0879821	0.0964425	0.112747	0.111439	0.0932884	0.0842444	0.0896469	0.144731	0.121962	0.12383	0.128109	0.0953921	0.118952	0.0942435	0.108022	0.121035	0.104889	0.0971018	0.0179078	0.095461	0.0146763	0.0991995	0.0175595	0.0232197	0.0185302	0.0174035	0.0126641	0.0154324	0.0184137	0.0170636	0.0817599	0.135398	0.115861	0.130218	0.13671	0.105228
0.0823034	0.0783655	0.103349	0.100774	0.0974748	0.0782297	0.0936177	0.0881677	0.0932335	0.116609	0.0555448	0.0953286	0.078858	0.107948	0.0808897	0.114875	0.107693	0.103029	0.121185	0.0969106	0.131996	0.13877	0.110164	0.144773	0.11102	0.0788465	0.0981715	0.0999209	0.0943997	0.105904	0.0842565	0.0816126	0.0132598	0.0849636	0.0240582	0.0877264	0.0181261	0.0178598	0.0144904	0.0148654	0.0129553	0.0121715	0.0109504	0.0154539	0.0818872	0.108925	0.123893	0.113893	0.120684	0.11035
0.0197512	0.0229488	0.0193202	0.0212855	0.0214232	0.0210328	0.0247931	0.0188858	0.0254029	0.0389784	0.0239622	0.0228811	0.0256042	0.0389029	0.0406252	0.0151976	0.0200173	0.0219423	0.0258556	0.0210744	0.0232024	0.0258223	0.0240913	0.017785	0.0218863	0.0195692	0.0178885	0.0200677	0.0293325	0.0345409	0.026568	0.0269017	0.0370517	0.0156871	0.0282577	0.0312706	0.0205595	0.0486119	0.0452954	0.0257921	0.0163765	0.0230213	0.0235197	0.0262634	0.0207284	0.0300153	0.0216167	0.0274901	0.0251745	0.0238347
0.0681531	0.0518218	0.0558202	0.0492177	0.0580012	0.0457477	0.0523019	0.0443022	0.0578583	0.0525686	0.0444334	0.0537829	0.0648698	0.0612187	0.0528739	0.0535622	0.074115	0.0608409	0.0573742	0.0508398	0.060646	0.0435318	0.0521115	0.0574304	0.0490055	0.0658032	0.0553369	0.0559215	0.0449371	0.0554192	0.149803	0.145569	0.0132886	0.0406117	0.0129651	0.0605173	0.0122157	0.0179105	0.0178666	0.0137105	0.01253	0.0134058	0.0164146	0.0158277	0.0339755	0.0627958	0.0717553	0.0823545	0.0630538	0.0571439
0.199133	0.203509	0.0489569	0.0616839	0.0728135	0.0511457	0.0654439	0.0659092	0.169119	0.115482	0.0409258	0.0876547	0.0567528	0.0743766	0.0875782	0.0459327	0.0494148	0.0645031	0.0571011	0.0567732	0.047	0.0550712	0.0544256	0.0433231	0.0524627	0.0507593	0.0540299	0.0436059	0.0567842	0.166512	0.104354	0.0965268	0.0230112	0.0451655	0.0187531	0.184716	0.0208571	0.0163503	0.0210097	0.0224353	0.0150766	0.0136091	0.0173528	0.0209818	0.0589572	0.0850916	0.0548685	0.054527	0.0535231	0.0629078
[truncated: 45 more columns]
