# Supplementary material for: Prediction of drug–target interaction by label propagation with mutual interaction information derived from heterogeneous network
Source: Royal Society of Chemistry journal article supplement (doi:10.1039/c5mb00615e), 2015-12-01
Supplement: c5mb00615e7.xlsx [file c5mb00615e7.xlsx]

## Sheet: DT network
Table S13 nuclear receptors (NRs) dataset drug-target interaction network
hsa:190	0	0	0	0	0	1	0	0	0	0	0	0	0	0	0	0	0	0	0	0	0	0	0	0	0	0	0	0	0	0	0	0	0	0	0	0	0	0	0	0	0	0	0	0	0	0	0	0	0
hsa:2099	0	1	1	0	0	0	1	0	0	0	0	0	0	0	0	0	0	1	0	1	0	0	0	0	1	0	1	0	0	0	0	0	0	1	0	1	0	1	0	0	1	0	0	0	1	0	1	0	0
hsa:2100	0	0	0	0	0	0	1	0	0	0	0	0	0	0	0	0	0	0	0	0	0	0	0	0	0	0	1	0	0	0	0	0	0	0	0	0	0	0	0	0	0	0	0	0	1	0	0	0	0
hsa:2101	0	0	0	0	0	0	0	0	0	0	0	0	0	0	0	0	0	0	0	0	0	0	0	0	0	0	1	0	0	0	0	0	0	0	0	0	0	0	0	0	0	0	0	0	0	0	0	0	0
hsa:2103	0	0	0	0	0	0	0	0	0	0	0	0	0	0	0	0	0	0	0	0	0	0	0	0	0	0	1	0	0	0	0	0	0	0	0	0	0	0	0	0	0	0	0	0	0	0	0	0	0
hsa:2104	0	0	0	0	0	0	0	0	0	0	0	0	0	0	0	0	0	0	0	0	0	0	0	0	0	0	1	0	0	0	0	0	0	0	0	0	0	0	0	0	0	0	0	0	0	0	0	0	0
hsa:2908	0	0	0	0	1	0	0	0	0	0	0	0	0	0	1	0	0	0	0	0	0	0	0	0	0	0	0	1	0	0	0	0	0	0	0	0	0	0	0	0	0	0	0	0	0	0	0	1	0
hsa:3174	0	0	0	0	0	0	0	0	0	0	0	0	0	0	0	0	0	0	0	0	0	0	0	0	0	0	0	0	0	0	0	0	0	0	0	0	0	0	0	0	0	0	0	0	0	0	0	0	0
hsa:367	0	0	0	1	0	0	0	0	0	0	0	0	0	0	0	0	0	0	0	1	0	0	1	0	0	0	0	1	1	0	0	0	0	0	0	0	0	0	1	1	0	1	0	0	0	0	0	0	0
hsa:4306	0	0	0	0	0	0	0	0	0	0	0	0	0	0	0	0	0	0	0	0	0	1	0	0	0	0	0	1	0	0	0	0	0	0	0	0	0	0	0	0	0	0	1	0	0	0	0	0	0
hsa:5241	0	1	0	0	0	0	0	0	0	0	1	0	0	0	0	0	0	0	0	0	0	0	0	0	0	0	0	1	0	0	0	1	0	0	0	1	1	1	0	0	0	0	0	0	0	1	1	0	0
hsa:5465	0	0	0	0	0	0	0	0	0	0	0	0	0	0	0	1	0	0	0	0	0	0	0	0	0	1	0	0	0	0	0	0	0	0	0	0	0	0	0	0	0	0	0	0	0	0	0	0	0
hsa:5468	0	0	0	0	0	0	0	0	0	0	0	0	0	0	0	0	0	0	0	0	0	0	0	0	0	0	0	0	0	1	1	0	0	0	0	0	0	0	0	0	0	0	0	0	0	0	0	0	0
hsa:5914	0	0	0	0	0	1	0	0	0	0	0	0	0	0	0	0	0	0	1	0	1	0	0	0	0	0	0	0	0	0	0	0	0	0	0	0	0	0	0	0	0	0	0	1	0	0	0	0	0
hsa:5915	0	0	0	0	0	1	0	0	0	0	0	0	0	0	0	0	0	0	1	0	0	0	0	0	0	0	0	0	0	0	0	0	0	0	0	0	0	0	0	0	0	0	0	1	0	0	0	0	0
hsa:5916	0	0	0	0	0	1	0	0	0	0	0	0	0	0	0	0	0	0	1	0	0	0	0	0	0	0	0	0	0	0	0	0	0	0	0	0	0	0	0	0	0	0	0	1	0	0	0	0	0
hsa:6095	1	0	0	0	0	0	0	0	0	0	0	0	0	0	0	0	0	0	0	0	0	0	0	0	0	0	0	0	0	0	0	0	0	0	0	0	0	0	0	0	0	0	0	0	0	0	0	0	1
hsa:6096	0	0	0	0	0	1	0	0	0	0	0	0	0	0	0	0	0	0	0	0	0	0	0	0	0	0	0	0	0	0	0	0	0	0	0	0	0	0	0	0	0	0	0	1	0	0	0	0	0
hsa:6097	0	0	0	0	0	1	0	0	0	0	0	0	0	0	0	0	0	0	0	0	0	0	0	0	0	0	0	0	0	0	0	0	0	0	0	0	0	0	0	0	0	0	0	0	0	0	0	0	0
hsa:6256	0	0	0	0	0	1	0	0	0	0	0	0	0	0	0	0	0	0	1	0	0	0	0	0	0	0	0	0	0	0	0	0	0	0	0	0	0	0	0	0	0	0	0	1	0	0	0	0	0
hsa:6257	0	0	0	0	0	1	0	0	0	0	0	0	0	0	0	0	0	0	1	0	0	0	0	0	0	0	0	0	0	0	0	0	0	0	0	0	0	0	0	0	0	0	0	1	0	0	0	0	0
hsa:6258	0	0	0	0	0	1	0	0	0	0	0	0	0	0	0	0	0	0	1	0	0	0	0	0	0	0	0	0	0	0	0	0	0	0	0	0	0	0	0	0	0	0	0	1	0	0	0	0	0
hsa:7421	0	0	0	0	0	0	0	1	0	0	0	1	1	0	0	0	1	0	0	0	0	0	0	0	0	0	0	0	0	0	0	0	0	0	1	0	0	0	0	0	0	0	0	0	0	0	0	0	0
hsa:8856	0	0	0	0	0	0	0	0	1	0	0	0	0	1	0	0	0	0	0	0	0	0	0	0	0	0	0	0	0	0	0	0	1	0	0	0	0	0	0	0	0	0	0	0	0	0	0	0	0
hsa:9970	0	0	0	0	0	0	0	0	0	0	0	0	0	0	0	0	0	0	0	0	0	0	0	1	0	0	0	0	0	0	0	0	0	0	0	0	0	0	0	0	0	0	0	0	0	0	0	0	0
hsa:9971	0	0	0	0	0	0	0	0	0	1	0	0	0	0	0	0	0	0	0	0	0	0	0	0	0	0	0	0	0	0	0	0	0	0	0	0	0	0	0	0	0	0	0	0	0	0	0	0	0
[truncated: 5 more columns]

## Sheet: target similarity
1	0.0260267	0.0251996	0.041951	0.0427596	0.0518851	0.0191142	0.0672012	0.0192124	0.0203469	0.0207718	0.0273346	0.0284548	0.0250328	0.0237477	0.0249774	0.0179333	0.0203434	0.0268482	0.0709574	0.0628827	0.036939	0.0371597	0.0351697	0.0287874	0.0360788
0.0260267	1	0.385292	0.2541	0.241851	0.258894	0.131048	0.140771	0.119238	0.120272	0.129517	0.0928416	0.109252	0.140516	0.148843	0.148462	0.0853388	0.0907108	0.0810575	0.182939	0.168555	0.0386844	0.112384	0.0952732	0.127435	0.117584
0.0251996	0.385292	1	0.239561	0.226573	0.240141	0.144458	0.148144	0.119957	0.122778	0.131196	0.0961173	0.0944791	0.148963	0.141944	0.145227	0.0886475	0.095294	0.0869836	0.168528	0.157882	0.0366356	0.102551	0.0887874	0.137044	0.126921
0.041951	0.2541	0.239561	1	0.509638	0.545147	0.154412	0.184967	0.124192	0.136918	0.142383	0.110056	0.128352	0.188525	0.183205	0.195533	0.094996	0.102751	0.0927662	0.23672	0.216986	0.0387733	0.138295	0.124021	0.169994	0.136655
0.0427596	0.241851	0.226573	0.509638	1	0.721186	0.144227	0.190795	0.110718	0.114967	0.133363	0.123747	0.126887	0.177807	0.183425	0.208026	0.0917355	0.0962212	0.0931881	0.232587	0.20665	0.0376574	0.141188	0.112519	0.157941	0.140225
0.0518851	0.258894	0.240141	0.545147	0.721186	1	0.161483	0.199652	0.119157	0.130254	0.140475	0.142407	0.14244	0.215259	0.206062	0.2311	0.0946959	0.100863	0.0939674	0.250418	0.216729	0.0408015	0.142766	0.115004	0.16198	0.153876
0.0191142	0.131048	0.144458	0.154412	0.144227	0.161483	1	0.102922	0.233661	0.276681	0.257273	0.0770236	0.068035	0.0956682	0.0967512	0.0998964	0.061022	0.0653405	0.0632341	0.114512	0.101279	0.0424742	0.0641	0.0716088	0.107363	0.0922509
0.0672012	0.140771	0.148144	0.184967	0.190795	0.199652	0.102922	1	0.0931003	0.0823123	0.0971538	0.132132	0.131241	0.174742	0.189035	0.179164	0.097709	0.10743	0.102083	0.300162	0.278861	0.0352477	0.119421	0.115133	0.152691	0.130524
0.0192124	0.119238	0.119957	0.124192	0.110718	0.119157	0.233661	0.0931003	1	0.205293	0.254715	0.0614302	0.0638462	0.0872173	0.0845598	0.0910417	0.0556789	0.0607664	0.0572738	0.104677	0.0936364	0.028328	0.0678686	0.0648461	0.087787	0.0816835
0.0203469	0.120272	0.122778	0.136918	0.114967	0.130254	0.276681	0.0823123	0.205293	1	0.230991	0.0699413	0.0667951	0.0870933	0.0849722	0.0955033	0.0610716	0.071358	0.0648468	0.0905694	0.082031	0.0359638	0.0761896	0.0756135	0.094019	0.0855913
0.0207718	0.129517	0.131196	0.142383	0.133363	0.140475	0.257273	0.0971538	0.254715	0.230991	1	0.059277	0.0697549	0.0848908	0.078278	0.0871159	0.05782	0.0624412	0.0573597	0.104159	0.0966434	0.0358803	0.0600288	0.0663301	0.0926008	0.0775708
0.0273346	0.0928416	0.0961173	0.110056	0.123747	0.142407	0.0770236	0.132132	0.0614302	0.0699413	0.059277	1	0.544391	0.201526	0.212328	0.203273	0.165451	0.177733	0.141836	0.175136	0.147766	0.032006	0.163257	0.146106	0.125269	0.152316
0.0284548	0.109252	0.0944791	0.128352	0.126887	0.14244	0.068035	0.131241	0.0638462	0.0667951	0.0697549	0.544391	1	0.19466	0.20203	0.198253	0.171437	0.186253	0.155261	0.170568	0.143658	0.0295084	0.182383	0.162154	0.125101	0.171528
0.0250328	0.140516	0.148963	0.188525	0.177807	0.215259	0.0956682	0.174742	0.0872173	0.0870933	0.0848908	0.201526	0.19466	1	0.728869	0.694135	0.151816	0.163402	0.125573	0.233392	0.211265	0.0530732	0.174976	0.167253	0.175003	0.189036
0.0237477	0.148843	0.141944	0.183205	0.183425	0.206062	0.0967512	0.189035	0.0845598	0.0849722	0.078278	0.212328	0.20203	0.728869	1	0.718698	0.171635	0.178882	0.132404	0.234237	0.211116	0.0422929	0.180287	0.174372	0.175534	0.197552
0.0249774	0.148462	0.145227	0.195533	0.208026	0.2311	0.0998964	0.179164	0.0910417	0.0955033	0.0871159	0.203273	0.198253	0.694135	0.718698	1	0.162776	0.176709	0.130249	0.242854	0.218696	0.0476602	0.183108	0.160388	0.18237	0.191612
0.0179333	0.0853388	0.0886475	0.094996	0.0917355	0.0946959	0.061022	0.097709	0.0556789	0.0610716	0.05782	0.165451	0.171437	0.151816	0.171635	0.162776	1	0.578461	0.430085	0.116272	0.10316	0.0380212	0.163294	0.138406	0.104978	0.135811
0.0203434	0.0907108	0.095294	0.102751	0.0962212	0.100863	0.0653405	0.10743	0.0607664	0.071358	0.0624412	0.177733	0.186253	0.163402	0.178882	0.176709	0.578461	1	0.458057	0.124942	0.110785	0.0346375	0.161151	0.147545	0.116166	0.144856
0.0268482	0.0810575	0.0869836	0.0927662	0.0931881	0.0939674	0.0632341	0.102083	0.0572738	0.0648468	0.0573597	0.141836	0.155261	0.125573	0.132404	0.130249	0.430085	0.458057	1	0.120009	0.109786	0.0352917	0.143723	0.156084	0.105401	0.108266
0.0709574	0.182939	0.168528	0.23672	0.232587	0.250418	0.114512	0.300162	0.104677	0.0905694	0.104159	0.175136	0.170568	0.233392	0.234237	0.242854	0.116272	0.124942	0.120009	1	0.622799	0.0581965	0.130657	0.12632	0.151056	0.158002
0.0628827	0.168555	0.157882	0.216986	0.20665	0.216729	0.101279	0.278861	0.0936364	0.082031	0.0966434	0.147766	0.143658	0.211265	0.211116	0.218696	0.10316	0.110785	0.109786	0.622799	1	0.0443201	0.10984	0.116767	0.127375	0.136587
0.036939	0.0386844	0.0366356	0.0387733	0.0376574	0.0408015	0.0424742	0.0352477	0.028328	0.0359638	0.0358803	0.032006	0.0295084	0.0530732	0.0422929	0.0476602	0.0380212	0.0346375	0.0352917	0.0581965	0.0443201	1	0.0431599	0.0488062	0.0329581	0.036481
0.0371597	0.112384	0.102551	0.138295	0.141188	0.142766	0.0641	0.119421	0.0678686	0.0761896	0.0600288	0.163257	0.182383	0.174976	0.180287	0.183108	0.163294	0.161151	0.143723	0.130657	0.10984	0.0431599	1	0.358627	0.272159	0.202261
0.0351697	0.0952732	0.0887874	0.124021	0.112519	0.115004	0.0716088	0.115133	0.0648461	0.0756135	0.0663301	0.146106	0.162154	0.167253	0.174372	0.160388	0.138406	0.147545	0.156084	0.12632	0.116767	0.0488062	0.358627	1	0.324825	0.189049
0.0287874	0.127435	0.137044	0.169994	0.157941	0.16198	0.107363	0.152691	0.087787	0.094019	0.0926008	0.125269	0.125101	0.175003	0.175534	0.18237	0.104978	0.116166	0.105401	0.151056	0.127375	0.0329581	0.272159	0.324825	1	0.190025
0.0360788	0.117584	0.126921	0.136655	0.140225	0.153876	0.0922509	0.130524	0.0816835	0.0855913	0.0775708	0.152316	0.171528	0.189036	0.197552	0.191612	0.135811	0.144856	0.108266	0.158002	0.136587	0.036481	0.202261	0.189049	0.190025	1

## Sheet: drugsimilarity
1	0.545455	0.297297	0.53125	0.459459	0.190476	0.333333	0.526316	0.7	0.6	0.428571	0.540541	0.647059	0.208333	0.372093	0.073171	0.5	0.232558	0.125	0.444444	0.190476	0.425	0.470588	0.046512	0.282051	0.104167	0.066667	0.363636	0.068182	0.070175	0.080645	0.26	0.076923	0.066667	0.414634	0.416667	0.473684	0.416667	0.414634	0.055556	0.076923	0.041667	0.348837	0.104167	0.277778	0.5	0.4	0.306122	0.129032	0.363636
0.545455	1	0.387097	0.833333	0.689655	0.184211	0.387097	0.358974	0.769231	0.457143	0.607143	0.368421	0.378378	0.188406	0.459459	0.083333	0.333333	0.333333	0.065217	0.62069	0.184211	0.677419	0.5	0.111111	0.323529	0.090909	0.04878	0.447368	0.105263	0.076923	0.050847	0.380952	0.027778	0.04878	0.358974	0.586207	0.7	0.586207	0.514286	0.061224	0.031746	0.097561	0.472222	0.116279	0.207547	0.84	0.5	0.404762	0.140351	0.447368
0.297297	0.387097	1	0.464286	0.352941	0.105263	0.818182	0.25	0.34375	0.297297	0.448276	0.25641	0.263158	0.161765	0.275	0.2	0.25641	0.730769	0.121951	0.375	0.105263	0.289474	0.4	0.233333	0.75	0.153846	0.212121	0.405405	0.21875	0.204545	0.113208	0.309524	0.214286	0.212121	0.25	0.433333	0.297297	0.433333	0.470588	0.166667	0.107143	0.3125	0.25	0.25	0.386364	0.34375	0.297297	0.244444	0.215686	0.3
0.53125	0.833333	0.464286	1	0.678571	0.162162	0.464286	0.342105	0.62963	0.441176	0.72	0.351351	0.361111	0.19403	0.444444	0.057143	0.315789	0.352941	0.044444	0.666667	0.162162	0.5625	0.535714	0.117647	0.387097	0.045455	0.078947	0.472222	0.052632	0.08	0.034483	0.365854	0.029412	0.078947	0.342105	0.692308	0.580645	0.692308	0.545455	0.041667	0.05	0.102564	0.457143	0.121951	0.24	0.692308	0.484848	0.390244	0.105263	0.472222
0.459459	0.689655	0.352941	0.678571	1	0.142857	0.352941	0.333333	0.580645	0.421053	0.6	0.27907	0.317073	0.231884	0.628571	0.076923	0.309524	0.275	0.061224	0.724138	0.142857	0.527778	0.454545	0.102564	0.371429	0.085106	0.095238	0.487179	0.097561	0.092593	0.048387	0.487805	0.052632	0.095238	0.333333	0.580645	0.588235	0.580645	0.435897	0.078431	0.0625	0.090909	0.473684	0.108696	0.218182	0.580645	0.421053	0.47619	0.133333	0.526316
0.190476	0.184211	0.105263	0.162162	0.142857	1	0.105263	0.238095	0.184211	0.219512	0.128205	0.342105	0.25	0.125	0.152174	0.085714	0.342105	0.093023	0.371429	0.179487	1	0.159091	0.157895	0.054054	0.1	0.093023	0.076923	0.173913	0.051282	0.1	0.109091	0.14	0.028571	0.076923	0.333333	0.125	0.190476	0.125	0.106383	0.02	0.103448	0.073171	0.155556	0.146341	0.067797	0.184211	0.162791	0.137255	0.084746	0.148936
0.333333	0.387097	0.818182	0.464286	0.352941	0.105263	1	0.282051	0.387097	0.333333	0.4	0.289474	0.297297	0.161765	0.275	0.2	0.289474	0.607143	0.121951	0.333333	0.105263	0.25641	0.4	0.15625	0.826087	0.153846	0.25	0.405405	0.21875	0.152174	0.113208	0.27907	0.214286	0.25	0.282051	0.34375	0.263158	0.34375	0.470588	0.195122	0.127273	0.235294	0.219512	0.25	0.452381	0.34375	0.297297	0.217391	0.215686	0.268293
0.526316	0.358974	0.25	0.342105	0.333333	0.238095	0.282051	1	0.394737	0.487179	0.3	0.638889	0.8125	0.202703	0.297872	0.095238	0.512821	0.195652	0.142857	0.35	0.238095	0.282609	0.333333	0.044444	0.268293	0.1	0.086957	0.319149	0.065217	0.105263	0.078125	0.226415	0.073171	0.086957	0.714286	0.292683	0.318182	0.292683	0.304348	0.072727	0.090909	0.061224	0.276596	0.1	0.267857	0.325	0.288889	0.294118	0.125	0.265306
0.7	0.769231	0.34375	0.62963	0.580645	0.184211	0.387097	0.394737	1	0.545455	0.5	0.444444	0.457143	0.188406	0.384615	0.083333	0.405405	0.263158	0.065217	0.516129	0.184211	0.575758	0.551724	0.052632	0.323529	0.090909	0.075	0.375	0.105263	0.037037	0.050847	0.318182	0.027778	0.075	0.394737	0.483871	0.545455	0.483871	0.394737	0.083333	0.048387	0.046512	0.394737	0.116279	0.230769	0.703704	0.457143	0.372093	0.140351	0.375
0.6	0.457143	0.297297	0.441176	0.421053	0.219512	0.333333	0.487179	0.545455	1	0.351351	0.390244	0.473684	0.191781	0.311111	0.073171	0.357143	0.232558	0.08	0.405405	0.219512	0.425	0.515152	0.046512	0.315789	0.081633	0.090909	0.276596	0.044444	0.109091	0.116667	0.26	0.076923	0.090909	0.45	0.342105	0.365854	0.342105	0.348837	0.055556	0.111111	0.041667	0.348837	0.104167	0.277778	0.416667	0.365854	0.306122	0.129032	0.304348
0.428571	0.607143	0.448276	0.72	0.6	0.128205	0.4	0.3	0.5	0.351351	1	0.307692	0.315789	0.173913	0.358974	0.027027	0.307692	0.342857	0.021277	0.586207	0.128205	0.5	0.466667	0.114286	0.517241	0.021739	0.05	0.5	0.025	0.078431	0.016667	0.295455	0.028571	0.05	0.3	0.875	0.515152	0.875	0.529412	0.0625	0.032258	0.1	0.405405	0.119048	0.211538	0.5	0.612903	0.318182	0.084746	0.384615
0.540541	0.368421	0.25641	0.351351	0.27907	0.342105	0.289474	0.638889	0.444444	0.390244	0.307692	1	0.78125	0.173333	0.25	0.071429	0.757576	0.2	0.195652	0.358974	0.342105	0.26087	0.342105	0.045455	0.243902	0.102041	0.065217	0.326087	0.066667	0.068966	0.046154	0.207547	0.02381	0.065217	0.735294	0.3	0.357143	0.3	0.255319	0.035714	0.044118	0.040816	0.282609	0.102041	0.166667	0.333333	0.295455	0.27451	0.109375	0.244898
0.647059	0.378378	0.263158	0.361111	0.317073	0.25	0.297297	0.8125	0.457143	0.473684	0.315789	0.78125	1	0.175676	0.311111	0.073171	0.583333	0.204545	0.148936	0.368421	0.25	0.295455	0.351351	0.046512	0.25	0.104167	0.066667	0.333333	0.068182	0.109091	0.080645	0.235294	0.076923	0.066667	0.567568	0.307692	0.333333	0.307692	0.318182	0.055556	0.076923	0.041667	0.288889	0.104167	0.232143	0.342105	0.302326	0.306122	0.129032	0.276596
0.208333	0.188406	0.161765	0.19403	0.231884	0.125	0.161765	0.219178	0.188406	0.191781	0.173913	0.173333	0.175676	1	0.216216	0.119403	0.205479	0.135135	0.197183	0.220588	0.125	0.189189	0.140845	0.101449	0.157143	0.150685	0.112676	0.197368	0.068493	0.108434	0.101124	0.220779	0.073529	0.112676	0.202703	0.171429	0.26087	0.171429	0.202703	0.08642	0.074468	0.125	0.202703	0.166667	0.136364	0.205882	0.191781	0.266667	0.16092	0.22973
0.372093	0.459459	0.275	0.444444	0.628571	0.152174	0.275	0.297872	0.384615	0.311111	0.358974	0.25	0.311111	0.216216	1	0.093023	0.276596	0.217391	0.075472	0.486486	0.152174	0.395349	0.325	0.090909	0.261905	0.098039	0.108696	0.340426	0.086957	0.103448	0.09375	0.571429	0.071429	0.085106	0.297872	0.35	0.439024	0.35	0.326087	0.090909	0.089552	0.081633	0.355556	0.12	0.2	0.421053	0.311111	0.634146	0.140625	0.575
0.073171	0.083333	0.2	0.057143	0.076923	0.085714	0.2	0.095238	0.083333	0.073171	0.027027	0.071429	0.073171	0.119403	0.093023	1	0.071429	0.205882	0.354839	0.111111	0.085714	0.071429	0.085714	0.269231	0.1875	0.518519	0.333333	0.230769	0.25	0.225	0.222222	0.214286	0.5	0.285714	0.095238	0.054054	0.157895	0.054054	0.243243	0.25	0.208333	0.225806	0.121951	0.413793	0.14	0.083333	0.128205	0.155556	0.183673	0.2
0.425	0.3	0.25641	0.351351	0.309524	0.342105	0.289474	0.512821	0.405405	0.390244	0.307692	0.757576	0.583333	0.205479	0.276596	0.071429	1	0.2	0.222222	0.358974	0.342105	0.288889	0.342105	0.045455	0.243902	0.102041	0.065217	0.355556	0.066667	0.068966	0.046154	0.230769	0.02381	0.065217	0.735294	0.3	0.357143	0.3	0.255319	0.035714	0.044118	0.040816	0.282609	0.102041	0.186441	0.333333	0.325581	0.27451	0.109375	0.244898
0.232558	0.333333	0.730769	0.352941	0.275	0.093023	0.607143	0.195652	0.263158	0.232558	0.342857	0.2	0.204545	0.135135	0.217391	0.205882	0.2	1	0.133333	0.289474	0.093023	0.255814	0.305556	0.2	0.566667	0.162791	0.153846	0.357143	0.222222	0.208333	0.103448	0.25	0.181818	0.153846	0.195652	0.333333	0.261905	0.333333	0.410256	0.227273	0.116667	0.305556	0.222222	0.219512	0.375	0.297297	0.261905	0.196078	0.264151	0.23913
0.125	0.065217	0.121951	0.044444	0.061224	0.371429	0.121951	0.142857	0.065217	0.08	0.021277	0.195652	0.148936	0.197183	0.075472	0.354839	0.222222	0.133333	1	0.06383	0.371429	0.057692	0.066667	0.102564	0.116279	0.275	0.179487	0.137255	0.153846	0.156863	0.160714	0.12963	0.212121	0.15	0.191489	0.042553	0.148936	0.042553	0.12	0.122449	0.133333	0.142857	0.098039	0.275	0.098361	0.065217	0.102041	0.107143	0.133333	0.137255
0.444444	0.62069	0.375	0.666667	0.724138	0.179487	0.333333	0.35	0.516129	0.405405	0.586207	0.358974	0.368421	0.220588	0.486486	0.111111	0.358974	0.289474	0.06383	1	0.179487	0.472222	0.483871	0.108108	0.352941	0.088889	0.1	0.513514	0.075	0.075472	0.05	0.475	0.027027	0.1	0.35	0.566667	0.485714	0.566667	0.384615	0.06	0.064516	0.121951	0.542857	0.113636	0.203704	0.516129	0.405405	0.463415	0.118644	0.513514
0.190476	0.184211	0.105263	0.162162	0.142857	1	0.105263	0.238095	0.184211	0.219512	0.128205	0.342105	0.25	0.125	0.152174	0.085714	0.342105	0.093023	0.371429	0.179487	1	0.159091	0.157895	0.054054	0.1	0.093023	0.076923	0.173913	0.051282	0.1	0.109091	0.14	0.028571	0.076923	0.333333	0.125	0.190476	0.125	0.106383	0.02	0.103448	0.073171	0.155556	0.146341	0.067797	0.184211	0.162791	0.137255	0.084746	0.148936
0.425	0.677419	0.289474	0.5625	0.527778	0.159091	0.25641	0.282609	0.575758	0.425	0.5	0.26087	0.266667	0.189189	0.395349	0.071429	0.288889	0.255814	0.057692	0.472222	0.159091	1	0.5	0.095238	0.275	0.08	0.042553	0.386364	0.090909	0.068966	0.046154	0.333333	0.02381	0.042553	0.282609	0.485714	0.540541	0.485714	0.372093	0.054545	0.028986	0.085106	0.685714	0.102041	0.186441	0.625	0.425	0.354167	0.126984	0.386364
0.470588	0.5	0.4	0.535714	0.454545	0.157895	0.4	0.333333	0.551724	0.515152	0.466667	0.342105	0.351351	0.140845	0.325	0.085714	0.342105	0.305556	0.066667	0.483871	0.157895	0.5	1	0.054054	0.419355	0.068182	0.076923	0.35	0.051282	0.037736	0.051724	0.266667	0.028571	0.076923	0.368421	0.451613	0.388889	0.451613	0.3	0.040816	0.04918	0.047619	0.444444	0.119048	0.211538	0.40625	0.388889	0.348837	0.122807	0.35
0.046512	0.111111	0.233333	0.117647	0.102564	0.054054	0.15625	0.044444	0.052632	0.046512	0.114286	0.045455	0.046512	0.101449	0.090909	0.269231	0.045455	0.2	0.102564	0.108108	0.054054	0.095238	0.054054	1	0.147059	0.166667	0.233333	0.195122	0.16129	0.282051	0.142857	0.155556	0.291667	0.193548	0.044444	0.142857	0.097561	0.142857	0.236842	0.15	0.156863	0.344828	0.093023	0.166667	0.09434	0.111111	0.046512	0.081633	0.113208	0.088889
0.282051	0.323529	0.75	0.387097	0.371429	0.1	0.826087	0.268293	0.323529	0.315789	0.517241	0.243902	0.25	0.157143	0.261905	0.1875	0.243902	0.566667	0.116279	0.352941	0.1	0.275	0.419355	0.147059	1	0.146341	0.235294	0.459459	0.205882	0.145833	0.109091	0.295455	0.2	0.235294	0.268293	0.451613	0.282051	0.451613	0.405405	0.186047	0.122807	0.222222	0.238095	0.27027	0.4	0.285714	0.388889	0.208333	0.207547	0.285714
0.104167	0.090909	0.153846	0.045455	0.085106	0.093023	0.153846	0.1	0.090909	0.081633	0.021739	0.102041	0.104167	0.150685	0.098039	0.518519	0.102041	0.162791	0.275	0.088889	0.093023	0.08	0.068182	0.166667	0.146341	1	0.451613	0.212766	0.294118	0.26087	0.254902	0.22449	0.3	0.451613	0.1	0.021277	0.177778	0.021277	0.195652	0.384615	0.288462	0.205128	0.1	0.428571	0.137931	0.090909	0.104167	0.150943	0.288462	0.14
0.066667	0.04878	0.212121	0.078947	0.095238	0.076923	0.25	0.086957	0.075	0.090909	0.05	0.065217	0.066667	0.112676	0.108696	0.333333	0.065217	0.153846	0.179487	0.1	0.076923	0.042553	0.076923	0.233333	0.235294	0.451613	1	0.209302	0.21875	0.292683	0.282609	0.122449	0.36	0.818182	0.086957	0.075	0.043478	0.075	0.162791	0.361111	0.347826	0.2	0.041667	0.40625	0.173077	0.04878	0.043478	0.056604	0.265306	0.083333
0.363636	0.447368	0.405405	0.472222	0.487179	0.173913	0.405405	0.319149	0.375	0.276596	0.5	0.326087	0.333333	0.197368	0.340426	0.230769	0.355556	0.357143	0.137255	0.513514	0.173913	0.386364	0.35	0.195122	0.459459	0.212766	0.209302	1	0.159091	0.181818	0.145161	0.395833	0.179487	0.209302	0.291667	0.486486	0.428571	0.486486	0.47619	0.173077	0.138462	0.2	0.409091	0.23913	0.237288	0.375	0.395349	0.333333	0.213115	0.361702
0.068182	0.105263	0.21875	0.052632	0.097561	0.051282	0.21875	0.065217	0.105263	0.044444	0.025	0.066667	0.068182	0.068493	0.086957	0.25	0.066667	0.222222	0.153846	0.075	0.051282	0.090909	0.051282	0.16129	0.205882	0.294118	0.21875	0.159091	1	0.130435	0.137255	0.2	0.222222	0.21875	0.065217	0.02439	0.093023	0.02439	0.113636	0.411765	0.150943	0.576923	0.042553	0.222222	0.2	0.105263	0.044444	0.1	0.22	0.0625
0.070175	0.076923	0.204545	0.08	0.092593	0.1	0.152174	0.105263	0.037037	0.109091	0.078431	0.068966	0.109091	0.108434	0.103448	0.225	0.068966	0.208333	0.156863	0.075472	0.1	0.068966	0.037736	0.282051	0.145833	0.26087	0.292683	0.181818	0.130435	1	0.333333	0.152542	0.236842	0.292683	0.067797	0.076923	0.070175	0.076923	0.188679	0.24	0.388889	0.222222	0.067797	0.26087	0.138462	0.076923	0.033898	0.078125	0.171875	0.083333
0.080645	0.050847	0.113208	0.034483	0.048387	0.109091	0.113208	0.078125	0.050847	0.116667	0.016667	0.046154	0.080645	0.101124	0.09375	0.222222	0.046154	0.103448	0.160714	0.05	0.109091	0.046154	0.051724	0.142857	0.109091	0.254902	0.282609	0.145161	0.137255	0.333333	1	0.121212	0.204545	0.255319	0.045455	0.033333	0.046875	0.033333	0.112903	0.236364	0.285714	0.12963	0.045455	0.230769	0.126761	0.050847	0.046875	0.056338	0.372881	0.075758
0.26	0.380952	0.309524	0.365854	0.487805	0.14	0.27907	0.226415	0.318182	0.26	0.295455	0.207547	0.235294	0.220779	0.571429	0.214286	0.230769	0.25	0.12963	0.475	0.14	0.333333	0.266667	0.155556	0.295455	0.22449	0.122449	0.395833	0.2	0.152542	0.121212	1	0.195122	0.122449	0.226415	0.288889	0.465116	0.288889	0.413043	0.163636	0.132353	0.1875	0.413043	0.22449	0.225806	0.318182	0.3125	0.613636	0.184615	0.595238
0.076923	0.027778	0.214286	0.029412	0.052632	0.028571	0.214286	0.073171	0.027778	0.076923	0.028571	0.02381	0.076923	0.073529	0.071429	0.5	0.02381	0.181818	0.212121	0.027027	0.028571	0.02381	0.028571	0.291667	0.2	0.3	0.36	0.179487	0.222222	0.236842	0.204545	0.195122	1	0.259259	0.023256	0.057143	0.105263	0.057143	0.257143	0.228571	0.191489	0.2	0.1	0.344828	0.170213	0.027778	0.105263	0.111111	0.142857	0.15
0.066667	0.04878	0.212121	0.078947	0.095238	0.076923	0.25	0.086957	0.075	0.090909	0.05	0.065217	0.066667	0.112676	0.085106	0.285714	0.065217	0.153846	0.15	0.1	0.076923	0.042553	0.076923	0.193548	0.235294	0.451613	0.818182	0.209302	0.21875	0.292683	0.255319	0.122449	0.259259	1	0.086957	0.04878	0.043478	0.04878	0.136364	0.324324	0.347826	0.2	0.041667	0.363636	0.150943	0.04878	0.043478	0.056604	0.265306	0.061224
0.45	0.358974	0.25	0.342105	0.333333	0.333333	0.282051	0.714286	0.394737	0.45	0.3	0.735294	0.567568	0.202703	0.297872	0.095238	0.735294	0.195652	0.191489	0.35	0.333333	0.282609	0.368421	0.044444	0.268293	0.1	0.086957	0.291667	0.065217	0.067797	0.045455	0.226415	0.023256	0.086957	1	0.292683	0.318182	0.292683	0.25	0.053571	0.058824	0.061224	0.276596	0.1	0.20339	0.325	0.318182	0.269231	0.107692	0.24
0.416667	0.586207	0.433333	0.692308	0.580645	0.125	0.34375	0.292683	0.483871	0.342105	0.875	0.3	0.307692	0.171429	0.35	0.054054	0.3	0.333333	0.042553	0.566667	0.125	0.485714	0.451613	0.142857	0.451613	0.021277	0.075	0.486486	0.02439	0.076923	0.033333	0.288889	0.057143	0.04878	0.292683	1	0.5	1	0.472222	0.061224	0.048387	0.071429	0.394737	0.116279	0.185185	0.483871	0.59375	0.340909	0.083333	0.375
0.473684	0.7	0.297297	0.580645	0.588235	0.190476	0.263158	0.318182	0.545455	0.365854	0.515152	0.357143	0.333333	0.242857	0.439024	0.157895	0.357143	0.261905	0.148936	0.485714	0.190476	0.540541	0.388889	0.097561	0.282051	0.177778	0.043478	0.428571	0.093023	0.070175	0.046875	0.465116	0.105263	0.043478	0.318182	0.5	1	0.5	0.487179	0.055556	0.029412	0.086957	0.487179	0.177778	0.169492	0.645161	0.555556	0.454545	0.147541	0.5
0.416667	0.586207	0.433333	0.692308	0.580645	0.125	0.34375	0.292683	0.483871	0.342105	0.875	0.3	0.307692	0.171429	0.35	0.054054	0.3	0.333333	0.042553	0.566667	0.125	0.485714	0.451613	0.142857	0.451613	0.021277	0.075	0.486486	0.02439	0.076923	0.033333	0.288889	0.057143	0.04878	0.292683	1	0.5	1	0.472222	0.061224	0.048387	0.071429	0.394737	0.116279	0.185185	0.483871	0.59375	0.340909	0.083333	0.375
0.414634	0.514286	0.470588	0.545455	0.435897	0.106383	0.470588	0.304348	0.394737	0.348837	0.529412	0.255319	0.318182	0.202703	0.326087	0.243243	0.255319	0.410256	0.12	0.384615	0.106383	0.372093	0.3	0.236842	0.405405	0.195652	0.162791	0.47619	0.113636	0.188679	0.112903	0.413043	0.257143	0.136364	0.25	0.472222	0.487179	0.472222	1	0.134615	0.125	0.181818	0.395349	0.25	0.290909	0.432432	0.487179	0.346939	0.180328	0.409091
0.055556	0.061224	0.166667	0.041667	0.078431	0.02	0.195122	0.072727	0.083333	0.055556	0.0625	0.035714	0.055556	0.08642	0.090909	0.25	0.035714	0.227273	0.122449	0.06	0.02	0.054545	0.040816	0.15	0.186047	0.384615	0.361111	0.173077	0.411765	0.24	0.236364	0.163636	0.228571	0.324324	0.053571	0.061224	0.055556	0.061224	0.134615	1	0.245614	0.275	0.017241	0.317073	0.272727	0.061224	0.036364	0.083333	0.339623	0.070175
0.076923	0.031746	0.107143	0.05	0.0625	0.103448	0.127273	0.090909	0.048387	0.111111	0.032258	0.044118	0.076923	0.074468	0.089552	0.208333	0.044118	0.116667	0.133333	0.064516	0.103448	0.028986	0.04918	0.156863	0.122807	0.288462	0.347826	0.138462	0.150943	0.388889	0.306452	0.132353	0.191489	0.347826	0.058824	0.048387	0.029412	0.048387	0.125	0.245614	1	0.142857	0.028571	0.218182	0.185714	0.031746	0.029412	0.068493	0.235294	0.072464
0.041667	0.097561	0.3125	0.102564	0.090909	0.073171	0.235294	0.061224	0.046512	0.041667	0.1	0.040816	0.041667	0.140845	0.081633	0.225806	0.040816	0.305556	0.142857	0.121951	0.073171	0.085106	0.047619	0.344828	0.222222	0.205128	0.2	0.2	0.576923	0.222222	0.12963	0.1875	0.2	0.2	0.061224	0.071429	0.086957	0.071429	0.181818	0.275	0.142857	1	0.083333	0.205128	0.211538	0.097561	0.041667	0.09434	0.142857	0.102041
0.348837	0.472222	0.25	0.457143	0.473684	0.155556	0.219512	0.276596	0.394737	0.348837	0.405405	0.282609	0.288889	0.202703	0.355556	0.121951	0.282609	0.222222	0.098039	0.542857	0.155556	0.685714	0.444444	0.093023	0.238095	0.1	0.041667	0.409091	0.042553	0.067797	0.045455	0.413043	0.1	0.041667	0.276596	0.394737	0.487179	0.394737	0.395349	0.017241	0.028571	0.083333	1	0.170213	0.145161	0.432432	0.414634	0.434783	0.107692	0.44186
0.104167	0.116279	0.25	0.121951	0.108696	0.146341	0.25	0.1	0.116279	0.104167	0.119048	0.102041	0.104167	0.166667	0.12	0.413793	0.102041	0.219512	0.275	0.113636	0.146341	0.102041	0.119048	0.166667	0.27027	0.428571	0.40625	0.23913	0.222222	0.26087	0.230769	0.22449	0.344828	0.363636	0.1	0.116279	0.177778	0.116279	0.25	0.317073	0.218182	0.205128	0.170213	1	0.178571	0.116279	0.204545	0.150943	0.313725	0.1875
0.277778	0.207547	0.386364	0.24	0.218182	0.067797	0.452381	0.267857	0.230769	0.277778	0.211538	0.166667	0.232143	0.136364	0.2	0.14	0.186441	0.375	0.098361	0.203704	0.067797	0.186441	0.211538	0.09434	0.4	0.137931	0.173077	0.237288	0.2	0.138462	0.126761	0.225806	0.170213	0.150943	0.20339	0.185185	0.169492	0.185185	0.290909	0.272727	0.185714	0.211538	0.145161	0.178571	1	0.207547	0.169492	0.166667	0.202899	0.177419
0.5	0.84	0.34375	0.692308	0.580645	0.184211	0.34375	0.325	0.703704	0.416667	0.5	0.333333	0.342105	0.205882	0.421053	0.083333	0.333333	0.297297	0.065217	0.516129	0.184211	0.625	0.40625	0.111111	0.285714	0.090909	0.04878	0.375	0.105263	0.076923	0.050847	0.318182	0.027778	0.04878	0.325	0.483871	0.645161	0.483871	0.432432	0.061224	0.031746	0.097561	0.432432	0.116279	0.207547	1	0.416667	0.372093	0.140351	0.375
0.4	0.5	0.297297	0.484848	0.421053	0.162791	0.297297	0.288889	0.457143	0.365854	0.612903	0.295455	0.302326	0.191781	0.311111	0.128205	0.325581	0.261905	0.102041	0.405405	0.162791	0.425	0.388889	0.046512	0.388889	0.104167	0.043478	0.395349	0.044444	0.033898	0.046875	0.3125	0.105263	0.043478	0.318182	0.59375	0.555556	0.59375	0.487179	0.036364	0.029412	0.041667	0.380952	0.204545	0.169492	0.416667	1	0.391304	0.111111	0.463415
0.306122	0.404762	0.244444	0.390244	0.47619	0.137255	0.217391	0.294118	0.372093	0.306122	0.318182	0.27451	0.306122	0.266667	0.634146	0.155556	0.27451	0.196078	0.107143	0.463415	0.137255	0.354167	0.348837	0.081633	0.208333	0.150943	0.056604	0.333333	0.1	0.078125	0.056338	0.613636	0.111111	0.056604	0.269231	0.340909	0.454545	0.340909	0.346939	0.083333	0.068493	0.09434	0.434783	0.150943	0.166667	0.372093	0.361702	1	0.130435	0.545455
0.129032	0.140351	0.215686	0.105263	0.133333	0.084746	0.215686	0.125	0.140351	0.129032	0.084746	0.109375	0.129032	0.16092	0.140625	0.183673	0.109375	0.264151	0.133333	0.118644	0.084746	0.126984	0.122807	0.113208	0.207547	0.288462	0.24	0.213115	0.22	0.171875	0.372881	0.184615	0.142857	0.24	0.107692	0.083333	0.147541	0.083333	0.180328	0.314815	0.217391	0.142857	0.107692	0.313725	0.202899	0.140351	0.111111	0.130435	1	0.121212
0.363636	0.447368	0.3	0.472222	0.526316	0.148936	0.268293	0.265306	0.375	0.304348	0.384615	0.244898	0.276596	0.246575	0.575	0.2	0.244898	0.23913	0.137255	0.513514	0.148936	0.386364	0.35	0.088889	0.285714	0.14	0.083333	0.361702	0.0625	0.083333	0.075758	0.595238	0.15	0.061224	0.24	0.375	0.5	0.375	0.409091	0.070175	0.072464	0.102041	0.44186	0.1875	0.177419	0.375	0.463415	0.545455	0.121212	1
0.125	0.115385	0.25	0.098039	0.150943	0.055556	0.27907	0.140351	0.137255	0.145455	0.096154	0.084746	0.125	0.189873	0.157895	0.186047	0.084746	0.2	0.12963	0.134615	0.055556	0.103448	0.096154	0.130435	0.266667	0.304348	0.341463	0.196429	0.2	0.259259	0.254237	0.166667	0.195122	0.309524	0.101695	0.115385	0.105263	0.115385	0.181818	0.333333	0.327586	0.14	0.065574	0.304348	0.245902	0.115385	0.067797	0.126984	0.45283	0.116667
0.378378	0.4375	0.30303	0.517241	0.484848	0.125	0.34375	0.325	0.4375	0.342105	0.666667	0.333333	0.342105	0.15493	0.285714	0.054054	0.333333	0.230769	0.042553	0.46875	0.125	0.368421	0.451613	0.081081	0.40625	0.021277	0.075	0.410256	0.02439	0.037037	0.033333	0.234043	0.057143	0.04878	0.292683	0.769231	0.378378	0.769231	0.358974	0.061224	0.048387	0.022727	0.325	0.116279	0.185185	0.352941	0.545455	0.282609	0.083333	0.309524
0.295455	0.3	0.53125	0.351351	0.27907	0.085106	0.633333	0.255319	0.268293	0.295455	0.307692	0.208333	0.266667	0.157895	0.276596	0.25	0.208333	0.459459	0.170213	0.292683	0.085106	0.208333	0.307692	0.121951	0.545455	0.2	0.195122	0.326087	0.230769	0.169811	0.152542	0.361702	0.264706	0.166667	0.204082	0.268293	0.295455	0.268293	0.439024	0.234043	0.20339	0.243902	0.255319	0.285714	0.458333	0.268293	0.325581	0.27451	0.20339	0.386364
0.095238	0.025	0.027027	0.026316	0.047619	0.111111	0.027027	0.090909	0.025	0.15	0.025641	0.021739	0.095238	0.013158	0.088889	0.0625	0.021739	0.02381	0.047619	0.02439	0.111111	0.021739	0.025641	0.060606	0.025641	0.02381	0.085714	0.020408	0.027778	0.159091	0.14	0.039216	0.142857	0.027027	0.021277	0.051282	0.022222	0.051282	0.066667	0.044444	0.2	0.025641	0.021277	0.04878	0.282609	0.025	0.022222	0.038462	0.034483	0.06383
[truncated: 4 more columns]
