# Supplementary material for: Prediction of drug–target interaction by label propagation with mutual interaction information derived from heterogeneous network
Source: Royal Society of Chemistry journal article supplement (doi:10.1039/c5mb00615e), 2015-12-01
Supplement: c5mb00615e8.xlsx [file c5mb00615e8.xlsx]

## Sheet: DT network
Table S14 kinase disassociation constant (Kd) dataset drug-target interaction network
	AAK1	ABL1E255K_phosphorylated	ABL1F317I_nonphosphorylated	ABL1F317I_phosphorylated	ABL1F317L_nonphosphorylated	ABL1F317L_phosphorylated	ABL1H396P_nonphosphorylated	ABL1H396P_phosphorylated	ABL1M351T_phosphorylated	ABL1Q252H_nonphosphorylated	ABL1Q252H_phosphorylated	ABL1T315I_nonphosphorylated	ABL1T315I_phosphorylated	ABL1Y253F_phosphorylated	ABL1_nonphosphorylated	ABL1_phosphorylated	ABL2	ACVR1	ACVR1B	ACVR2A	ACVR2B	ACVRL1	ADCK3	ADCK4	AKT1	AKT2	AKT3	ALK	AMPK_alpha1	AMPK_alpha2	ANKK1	ARK5	ASK1	ASK2	AURKA	AURKB	AURKC	AXL	BIKE	BLK	BMPR1A	BMPR1B	BMPR2	BMX	BRAF	BRAFV600E	BRK	BRSK1	BRSK2
11314340	43	10000	10000	10000	10000	10000	10000	10000	10000	10000	10000	10000	10000	10000	10000	10000	10000	10000	10000	10000	10000	10000	10000	10000	76	2900	180	10000	10000	10000	10000	10000	10000	10000	10000	10000	8400	10000	120	10000	10000	10000	10000	10000	10000	10000	10000	10000	10000
24889392	10000	10000	10000	10000	10000	10000	10000	10000	10000	10000	10000	2600	10000	10000	10000	10000	10000	10000	10000	10000	10000	10000	10000	10000	10000	10000	10000	10000	10000	10000	10000	10000	10000	10000	10000	10000	10000	10000	10000	10000	10000	10000	10000	10000	10000	10000	10000	10000	10000
11409972	10000	75	1.9	13	0.77	13	2.6	31	34	0.93	31	2.8	25	10	0.68	13	3.4	10000	10000	10000	1400	10000	10000	10000	10000	10000	10000	1400	1400	10000	630	10000	10000	8000	10000	4400	740	570	10000	30	10000	10000	10000	5700	1700	130	10000	10000	10000
11338033	10000	10000	10000	10000	10000	10000	10000	10000	10000	10000	10000	10000	10000	10000	10000	10000	10000	10000	10000	10000	10000	10000	10000	10000	10000	10000	10000	10000	10000	10000	10000	10000	10000	10000	10000	10000	10000	10000	10000	10000	10000	10000	10000	10000	10000	10000	10000	10000	10000
10184653	10000	420	2900	750	580	230	500	500	1200	790	380	2600	870	830	1300	570	10000	10000	10000	10000	10000	10000	10000	10000	10000	10000	10000	10000	10000	10000	10000	10000	10000	10000	10000	10000	10000	5300	10000	220	10000	10000	10000	10000	10000	10000	10000	10000	10000
5287969	5300	1600	10000	5900	2500	890	1200	1700	1900	3100	1200	10000	10000	1600	3400	1500	10000	1900	10000	3100	2400	4500	10000	10000	10000	10000	10000	670	10000	10000	10000	10000	10000	10000	10000	10000	10000	3500	10000	10000	10000	450	10000	10000	10000	10000	10000	10000	10000
6450551	1200	63	2600	800	830	330	20	23	36	290	200	3.6	1.5	230	84	36	70	10000	10000	10000	5200	10000	10000	10000	10000	10000	10000	10000	10000	10000	3600	10000	10000	10000	72	11	1.3	420	1000	3100	10000	2900	10000	10000	10000	10000	10000	10000	10000
11364421	2800	5900	10000	10000	10000	2400	2000	2600	10000	10000	10000	10000	10000	10000	10000	3500	10000	10000	10000	10000	10000	10000	10000	10000	10000	10000	10000	160	10000	10000	10000	10000	10000	10000	10000	10000	10000	10000	10000	10000	10000	10000	10000	10000	10000	10000	10000	10000	10000
9926054	10000	10000	10000	10000	10000	10000	10000	10000	10000	10000	10000	10000	10000	10000	10000	10000	10000	10000	10000	10000	10000	10000	10000	10000	10000	10000	10000	10000	10000	10000	10000	10000	10000	10000	10000	10000	10000	10000	10000	10000	10000	10000	10000	10000	10000	10000	10000	10000	10000
16007391	3000	9600	3800	4600	1400	2300	1200	10000	2200	860	6800	1100	4800	3800	1500	5500	10000	10000	10000	10000	10000	10000	10000	10000	10000	10000	10000	10000	10000	10000	1500	10000	10000	10000	400	4.6	4.4	390	10000	1500	10000	10000	10000	10000	10000	10000	10000	10000	10000
5328940	2300	0.047	0.63	0.18	0.11	0.029	0.062	0.057	0.037	0.086	0.039	21	3.6	0.036	0.12	0.057	1.5	10000	10000	10000	10000	10000	10000	10000	10000	10000	10000	690	3900	10000	2100	5900	10000	10000	10000	10000	10000	52	350	3.3	10000	10000	580	200	10000	10000	10000	10000	10000
11234052	10000	580	10000	10000	4100	2300	390	640	450	1500	1200	1700	450	1100	1100	640	1800	10000	10000	10000	10000	10000	10000	10000	10000	10000	10000	10000	10000	10000	10000	10000	10000	10000	10000	10000	10000	10000	10000	2000	10000	10000	10000	10000	10000	10000	10000	10000	10000
11656518	10000	10000	7800	10000	2400	10000	920	5600	2000	440	7400	6100	10000	2700	300	3600	1900	10000	10000	10000	10000	10000	10000	10000	10000	10000	10000	10000	4500	10000	10000	10000	10000	10000	10000	10000	10000	10000	10000	7900	10000	10000	10000	10000	1200	330	3600	10000	10000
6918454	10000	10000	10000	10000	10000	10000	10000	10000	10000	10000	10000	10000	10000	10000	10000	10000	10000	10000	10000	10000	10000	10000	10000	10000	10000	10000	10000	10000	10000	10000	10000	10000	10000	10000	10000	10000	1800	10000	10000	10000	10000	10000	10000	10000	10000	10000	10000	10000	10000
156414	10000	30	3200	1000	1500	91	46	57	38	91	22	690	69	42	210	30	870	1700	10000	10000	10000	10000	1500	3400	10000	10000	10000	7700	10000	10000	10000	10000	10000	10000	10000	4200	2800	5700	3800	45	10000	2600	10000	2600	10000	10000	3800	10000	10000
9933475	10000	65	2800	1300	390	280	39	45	56	100	78	110	20	55	100	78	730	3400	1500	10000	10000	10000	10000	10000	10000	10000	10000	2300	10000	10000	10000	10000	10000	10000	10000	3200	2100	490	10000	120	10000	10000	10000	10000	10000	10000	560	10000	10000
11626560	2300	170	2700	3200	610	590	33	87	97	97	100	12	10	74	78	110	460	440	860	10000	10000	10000	10000	1100	10000	10000	10000	3.3	2400	10000	780	10000	10000	10000	260	76	4300	7.8	740	110	10000	230	10000	3600	10000	10000	10000	10000	10000
3062316	10000	0.047	0.1	0.041	0.032	0.019	0.025	0.046	0.016	0.037	0.064	890	120	0.058	0.029	0.046	0.17	620	330	210	570	460	190	10000	10000	10000	10000	10000	10000	10000	10000	10000	10000	10000	9300	10000	10000	10000	10000	0.21	7000	53	10000	1.4	500	570	7.8	10000	10000
156422	10000	10000	4900	10000	1300	10000	3300	10000	10000	830	10000	59	550	8500	800	10000	1300	10000	10000	10000	10000	10000	10000	10000	10000	10000	10000	10000	10000	10000	1000	10000	10000	10000	10000	10000	10000	10000	10000	680	10000	10000	10000	10000	2700	10000	10000	10000	10000
44150621	170	75	10000	4500	1500	1100	42	60	48	75	58	110	31	46	100	54	10000	10000	10000	10000	10000	10000	10000	10000	10000	10000	10000	3500	520	820	79	240	10000	10000	10000	280	1100	3800	54	190	10000	10000	3100	10000	10000	10000	10000	10000	10000
176167	2700	10000	10000	10000	10000	10000	10000	10000	10000	10000	10000	10000	10000	10000	10000	10000	10000	10000	10000	10000	10000	10000	10000	10000	10000	10000	1000	10000	10000	5000	10000	10000	10000	10000	10000	10000	10000	3300	2900	10000	10000	10000	10000	10000	10000	10000	10000	10000	10000
176870	1200	63	8200	1100	640	150	89	58	66	230	61	620	59	76	330	76	200	10000	10000	10000	10000	10000	1900	2500	10000	10000	10000	1200	10000	10000	10000	10000	10000	10000	2200	1400	600	4000	1200	190	10000	10000	10000	10000	10000	10000	10000	10000	10000
42642645	10000	150	40	250	20	170	10	110	36	4	120	18	310	37	5.6	56	27	10000	10000	10000	10000	10000	10000	10000	10000	10000	10000	69	730	1200	1500	10000	10000	10000	440	43	12	0.093	10000	5.4	10000	10000	10000	200	3500	2300	4.3	10000	10000
11717001	10000	10000	10000	10000	10000	10000	3200	10000	10000	10000	10000	10000	10000	10000	10000	10000	10000	10000	2400	10000	10000	10000	10000	10000	10000	10000	10000	10000	10000	10000	10000	10000	10000	10000	10000	10000	10000	10000	10000	10000	10000	1800	10000	10000	0.19	0.18	10000	10000	10000
16725726	10000	10000	10000	10000	10000	10000	10000	10000	10000	10000	10000	10000	10000	10000	10000	10000	10000	10000	10000	10000	10000	10000	10000	10000	2.2	2.1	3	10000	10000	10000	10000	420	10000	10000	10000	10000	10000	10000	10000	10000	10000	10000	10000	10000	10000	10000	10000	10000	10000
11617559	10000	10000	10000	10000	10000	10000	10000	10000	10000	10000	10000	10000	10000	10000	10000	10000	10000	10000	10000	10000	10000	10000	10000	10000	10000	10000	10000	10000	10000	10000	10000	10000	10000	10000	10000	10000	10000	10000	10000	10000	10000	10000	10000	10000	10000	10000	10000	10000	10000
123631	10000	400	10000	4700	2700	780	680	460	520	1100	230	10000	10000	360	2200	480	1600	10000	10000	10000	10000	10000	10000	10000	10000	10000	10000	10000	10000	10000	10000	10000	10000	10000	10000	10000	10000	1800	10000	1200	10000	10000	10000	10000	10000	10000	10000	10000	10000
5291	10000	170	8.3	580	2.5	110	5.9	65	44	1.8	92	10000	10000	130	1.1	21	10	10000	10000	10000	10000	10000	10000	10000	10000	10000	10000	10000	10000	10000	10000	10000	10000	10000	10000	10000	10000	10000	10000	520	10000	10000	10000	10000	10000	3300	10000	10000	10000
4908365	520	370	8600	4500	2500	1200	280	440	230	340	230	930	180	350	670	390	5300	390	10	10000	10000	1900	10000	10000	10000	10000	10000	840	200	4.1	1400	2300	10000	8000	10000	2900	3000	5.3	140	11	10000	370	310	780	10000	10000	10000	10000	10000
11427553	48	36	1600	530	360	94	17	24	19	47	22	12	5.9	36	63	75	250	140	10000	320	370	10000	10000	10000	10000	10000	10000	660	430	440	82	10000	10000	10000	650	88	59	180	9.6	3500	1900	120	370	1900	10000	10000	10000	1900	1200
208908	10000	10000	10000	10000	10000	10000	10000	10000	10000	10000	10000	10000	10000	10000	10000	10000	10000	10000	10000	10000	10000	10000	10000	10000	10000	10000	10000	10000	10000	10000	10000	10000	10000	10000	10000	10000	10000	10000	10000	10000	10000	10000	10000	10000	10000	10000	10000	10000	10000
126565	3.1	840	10000	4900	7600	2200	1000	870	780	2500	830	950	160	910	3200	1000	6500	75	86	2500	3800	2200	10000	10000	4400	2100	6200	71	25	56	32	3.7	70	170	16	16	4.1	35	16	160	950	57	1500	200	10000	10000	1700	25	16
11485656	10000	10000	10000	10000	10000	10000	10000	10000	10000	10000	10000	4400	10000	10000	10000	10000	10000	10000	10000	10000	10000	10000	10000	10000	10000	10000	10000	1600	10000	10000	10000	10000	10000	10000	1600	390	71	340	10000	10000	10000	710	7800	10000	10000	10000	10000	10000	10000
9929127	10000	10000	10000	10000	10000	10000	10000	10000	10000	10000	10000	10000	10000	10000	10000	10000	10000	10000	10000	10000	10000	10000	10000	10000	10000	10000	10000	10000	10000	10000	10000	10000	10000	10000	10000	10000	10000	10000	10000	10000	10000	10000	10000	10000	10000	10000	10000	10000	10000
11712649	10000	1900	10000	10000	10000	10000	510	940	750	630	1300	1600	2800	1000	1100	890	3300	10000	10000	10000	10000	10000	10000	10000	10000	10000	10000	10000	10000	10000	10000	10000	10000	10000	6.5	43	26	440	10000	68	10000	10000	10000	3100	10000	10000	10000	10000	10000
10074640	10000	140	8	78	10	110	11	140	140	6	4.6	10000	10000	25	2.1	55	110	10000	10000	10000	10000	10000	10000	10000	10000	10000	10000	10000	10000	10000	10000	10000	10000	10000	10000	10000	10000	10000	10000	150	10000	10000	10000	10000	10000	1800	10000	10000	10000
51004351	48	10000	10000	10000	10000	10000	3100	5600	10000	10000	10000	4900	790	10000	10000	10000	10000	10000	10000	10000	10000	10000	10000	10000	950	780	4400	270	180	460	10000	41	10000	10000	120	62	170	620	220	500	10000	10000	10000	10000	10000	10000	10000	1200	650
11667893	10000	10000	4000	10000	910	7700	1400	10000	10000	670	10000	10000	10000	4500	680	6700	4500	10000	10000	10000	10000	10000	10000	10000	10000	10000	10000	10000	10000	10000	10000	10000	10000	10000	10000	10000	1900	10000	10000	2200	10000	10000	10000	10000	630	280	1000	10000	10000
9915743	10000	10000	10000	10000	10000	10000	10000	10000	10000	7100	6000	10000	10000	10000	10000	10000	10000	10000	10000	10000	10000	10000	10000	10000	10000	10000	10000	10000	10000	10000	10000	1500	10000	10000	10000	10000	10000	190	10000	85	10000	10000	10000	10000	10000	10000	10000	10000	10000
644241	10000	36	18	56	12	14	4.9	21	15	10	21	660	10000	13	10	13	26	10000	10000	10000	10000	10000	10000	10000	10000	10000	10000	10000	10000	10000	10000	10000	10000	10000	10000	10000	10000	10000	10000	500	10000	10000	10000	10000	1700	570	10000	10000	10000
447077	10000	0.55	5	5.3	3.2	2.5	0.63	1.4	0.52	1.3	0.93	2100	480	0.88	1.5	0.58	0.69	160	96	10	9.1	69	910	27	10000	10000	10000	10000	10000	10000	10000	10000	10000	10000	10000	10000	5100	10000	10000	1.5	170	4	10000	32	5.7	4.4	48	3400	8900
10461815	320	770	10000	10000	10000	2900	10000	9000	1700	10000	9300	3800	3900	1200	2600	8200	6900	10000	10000	10000	10000	10000	10000	10000	10000	10000	10000	2700	310	770	10000	620	10000	10000	10000	2000	300	110	47	1900	10000	10000	6200	10000	10000	10000	10000	10000	10000
9884685	10000	10000	10000	10000	10000	10000	10000	10000	10000	10000	10000	10000	10000	10000	10000	10000	10000	10000	10000	10000	10000	10000	10000	10000	10000	10000	10000	10000	10000	10000	10000	10000	10000	10000	10000	10000	10000	10000	10000	10000	10000	10000	10000	10000	2900	2300	10000	10000	10000
24180719	10000	4500	1300	5000	940	5700	510	5000	2600	200	4000	10000	10000	1900	460	2300	2700	10000	10000	10000	3200	10000	10000	10000	10000	10000	10000	10000	10000	10000	10000	10000	10000	10000	10000	2300	2500	10000	10000	1100	10000	3100	10000	10000	330	100	48	10000	10000
25243800	1600	56	10000	1200	10000	240	49	58	60	240	75	1000	120	350	150	69	1200	4	58	18	7.6	2.9	3200	3500	10000	10000	2600	1100	10000	10000	2600	10000	10000	10000	10000	10000	10000	1200	6000	240	64	2.1	89	670	880	1600	1000	14	42
10113978	2900	800	10000	10000	4400	2700	380	700	560	530	530	3800	2100	480	620	650	3000	10000	10000	10000	2400	10000	10000	10000	10000	10000	10000	2200	10000	10000	10000	10000	10000	10000	7100	10000	750	10000	8800	2600	10000	1000	10000	10000	730	430	2300	10000	10000
17755052	9100	10000	10000	10000	10000	10000	10000	10000	10000	10000	10000	10000	10000	10000	10000	10000	10000	10000	10000	10000	10000	10000	10000	10000	10000	10000	10000	10000	10000	10000	10000	10000	10000	10000	10000	10000	10000	10000	10000	10000	10000	10000	10000	10000	10000	10000	10000	10000	10000
11984591	410	220	10000	10000	10000	10000	170	390	390	630	430	670	190	1800	530	340	720	4800	1100	10000	10000	10000	1100	64	10000	10000	10000	240	300	750	330	75	10000	10000	160	110	41	82	1900	25	10000	720	10000	180	240	380	360	10000	10000
153999	900	10000	10000	10000	10000	10000	10000	10000	10000	10000	10000	10000	10000	10000	10000	10000	10000	10000	10000	10000	10000	10000	10000	10000	10000	8700	1400	10000	10000	10000	10000	1800	10000	10000	10000	10000	10000	10000	430	10000	10000	10000	10000	10000	10000	10000	10000	10000	10000
25127112	120	2200	10000	10000	9500	2200	1100	10000	6200	2000	3500	10000	10000	10000	3700	10000	10000	10000	10000	10000	10000	10000	10000	10000	10000	10000	10000	1500	10000	10000	390	10000	10000	10000	10000	10000	8700	10000	210	10000	10000	1800	930	10000	2200	4200	10000	10000	10000
176155	10000	10000	10000	10000	10000	10000	2600	3900	10000	10000	10000	10000	10000	10000	10000	10000	10000	10000	3000	10000	10000	10000	10000	3100	10000	10000	10000	10000	10000	10000	10000	10000	10000	10000	10000	10000	10000	10000	10000	10000	10000	3300	10000	10000	710	530	3900	10000	10000
24779724	10000	10000	10000	10000	10000	10000	3400	10000	10000	10000	10000	10000	10000	10000	10000	10000	10000	10000	10000	10000	10000	10000	10000	10000	10000	10000	10000	10000	10000	10000	10000	10000	10000	10000	10000	10000	10000	10000	10000	10000	10000	10000	10000	10000	10000	10000	10000	10000	10000
3025986	10000	10000	10000	10000	10000	10000	10000	10000	10000	10000	10000	10000	10000	10000	10000	10000	10000	10000	10000	10000	10000	10000	10000	2900	10000	10000	10000	10000	8200	10000	10000	10000	10000	10000	7400	10000	5000	10000	10000	10000	10000	10000	10000	10000	1300	1600	10000	10000	5600
10138260	66	310	3400	2400	3300	1200	240	560	500	870	500	220	160	580	920	620	10000	10000	10000	10000	10000	10000	10000	10000	10000	10000	10000	490	100	290	160	460	10000	10000	10000	340	810	84	27	750	10000	3700	200	10000	10000	10000	10000	5000	4100
10127622	10000	10000	10000	10000	10000	10000	10000	10000	10000	10000	10000	10000	10000	10000	10000	10000	10000	10000	10000	10000	10000	10000	10000	10000	10000	10000	10000	10000	10000	10000	10000	10000	10000	10000	10000	10000	10000	10000	10000	10000	10000	10000	10000	10000	10000	10000	10000	10000	10000
216239	10000	3400	1700	4900	770	7100	520	2400	1200	130	5500	590	1500	660	130	1400	2900	10000	10000	10000	10000	10000	10000	10000	10000	10000	10000	10000	10000	10000	10000	10000	10000	10000	10000	440	210	4500	10000	10000	10000	10000	10000	10000	540	260	10000	10000	10000
44259	1.2	22	550	130	170	46	18	36	52	21	11	8.4	2.9	23	37	22	110	470	680	8900	4600	10000	10000	10000	20	44	170	32	3.7	12	270	4.4	110	260	17	19	23	6.8	5.6	15	3700	170	2300	170	10000	10000	2300	26	3.5
5329102	11	180	3600	890	730	370	74	140	120	240	76	150	55	140	270	150	1000	10000	10000	10000	10000	10000	10000	10000	10000	2700	10000	170	19	89	310	48	10000	10000	1700	380	220	9	5.5	65	10000	2400	570	10000	10000	10000	4600	3500	1100
16038120	470	190	93	14	54	19	73	160	95	39	70	52	5.4	100	200	170	380	29	97	2200	4300	57	1700	92	10000	10000	10000	1.1	27	49	9400	13	10000	1800	44	150	33	12	1900	130	170	0.85	3900	1100	10000	10000	36	310	190
10427712	870	10000	10000	10000	10000	8400	5300	3800	10000	10000	10000	7800	890	10000	10000	10000	10000	10000	10000	10000	10000	10000	94	1400	10000	10000	10000	10000	10000	10000	10000	10000	10000	10000	10000	10000	10000	10000	640	10000	10000	10000	10000	10000	2100	2000	5000	730	1200
16722836	35	40	2100	560	450	180	45	61	50	110	54	240	65	56	180	44	570	150	6700	10000	10000	2400	7000	300	10000	10000	10000	650	2400	4700	4300	34	10000	10000	4400	490	350	160	32	650	10000	410	2900	1200	9800	9300	1200	10000	10000
3038522	10000	10000	10000	10000	10000	10000	10000	10000	10000	10000	10000	10000	10000	10000	10000	10000	10000	2500	10000	10000	10000	10000	10000	10000	10000	10000	10000	10000	10000	10000	10000	10000	10000	10000	10000	1700	1600	6300	10000	10000	10000	10000	10000	10000	10000	10000	10000	10000	10000
9926791	10000	10000	10000	10000	10000	10000	4500	6700	10000	10000	10000	10000	2200	10000	10000	10000	10000	10000	10000	10000	10000	10000	10000	10000	10000	10000	10000	10000	10000	10000	10000	10000	10000	10000	10000	10000	10000	10000	7100	10000	10000	10000	10000	10000	10000	10000	10000	10000	10000
5494449	290	3	7200	2100	480	400	3.3	3.1	5.3	3.8	9.4	9.7	9.3	7.8	13	7.5	4	1900	10000	10000	10000	9500	10000	10000	10000	10000	10000	3100	1100	350	5600	200	10000	10000	3.9	7.4	6.3	210	65	2200	10000	1100	7100	2600	10000	10000	10000	8400	10000
3038525	10000	10000	10000	10000	10000	10000	10000	10000	10000	10000	10000	10000	10000	10000	10000	10000	1900	10000	10000	10000	10000	10000	10000	10000	10000	10000	10000	10000	10000	10000	10000	10000	10000	10000	10000	10000	10000	10000	10000	3100	10000	10000	10000	10000	10000	10000	10000	10000	10000
3081361	10000	13	770	170	75	33	9.8	14	15	18	16	150	20	9	48	16	69	150	10000	10000	10000	470	4500	1700	10000	10000	10000	2100	3000	10000	10000	10000	10000	10000	10000	10000	1500	250	10000	66	10000	240	10000	10000	10000	10000	160	10000	10000
9809715	63	63	6900	2600	2300	640	45	49	52	73	28	66	10	37	230	64	2000	600	4900	10000	10000	4200	10000	10000	10000	10000	10000	31	87	84	10000	160	10000	10000	10000	420	190	12	2.2	380	10000	10000	56	10000	10000	10000	10000	10000	10000
151194	10000	10000	10000	10000	10000	10000	10000	10000	10000	10000	10000	10000	10000	10000	10000	10000	10000	10000	10000	10000	10000	10000	10000	10000	10000	10000	10000	10000	10000	10000	10000	10000	10000	10000	10000	10000	10000	10000	10000	10000	10000	10000	10000	10000	10000	10000	2400	10000	10000
[truncated: 393 more columns]

## Sheet: drug similarity
1	0.605	0.647	0.539	0.636	0.44	0.661	0.609	0.555	0.714	0.64	0.737	0.684	0.39	0.63	0.685	0.74	0.493	0.712	0.449	0.614	0.647	0.663	0.662	0.645	0.638	0.638	0.551	0.535	0.612	0.63	0.546	0.609	0.65	0.53	0.529	0.575	0.586	0.684	0.542	0.475	0.467	0.643	0.507	0.486	0.622	0.612	0.566	0.638	0.591
0.605	1	0.651	0.432	0.619	0.378	0.522	0.628	0.576	0.63	0.53	0.66	0.714	0.366	0.613	0.639	0.564	0.619	0.619	0.445	0.541	0.616	0.598	0.47	0.685	0.578	0.61	0.55	0.462	0.446	0.625	0.541	0.45	0.58	0.507	0.612	0.54	0.574	0.569	0.563	0.545	0.505	0.652	0.532	0.423	0.566	0.597	0.608	0.565	0.519
0.647	0.651	1	0.459	0.715	0.426	0.488	0.729	0.616	0.701	0.621	0.658	0.756	0.41	0.744	0.713	0.676	0.579	0.735	0.496	0.552	0.746	0.656	0.513	0.659	0.72	0.74	0.652	0.484	0.49	0.653	0.5	0.559	0.567	0.629	0.583	0.522	0.626	0.645	0.652	0.595	0.444	0.668	0.553	0.512	0.582	0.568	0.673	0.523	0.545
0.539	0.432	0.459	1	0.48	0.381	0.668	0.543	0.527	0.519	0.471	0.468	0.454	0.585	0.473	0.419	0.555	0.574	0.473	0.521	0.618	0.41	0.446	0.583	0.416	0.414	0.442	0.599	0.683	0.732	0.473	0.498	0.567	0.556	0.56	0.572	0.515	0.602	0.487	0.615	0.634	0.645	0.493	0.592	0.425	0.525	0.515	0.383	0.577	0.545
0.636	0.619	0.715	0.48	1	0.471	0.507	0.685	0.575	0.798	0.684	0.682	0.689	0.459	0.953	0.762	0.702	0.609	0.67	0.486	0.532	0.789	0.707	0.485	0.641	0.66	0.869	0.602	0.544	0.492	0.755	0.517	0.519	0.699	0.625	0.555	0.559	0.573	0.808	0.615	0.601	0.475	0.692	0.578	0.457	0.559	0.538	0.691	0.57	0.515
0.44	0.378	0.426	0.381	0.471	1	0.32	0.443	0.271	0.439	0.456	0.403	0.382	0.423	0.463	0.43	0.484	0.346	0.452	0.357	0.355	0.422	0.479	0.347	0.367	0.481	0.465	0.34	0.386	0.361	0.495	0.397	0.276	0.459	0.437	0.32	0.398	0.331	0.489	0.327	0.382	0.362	0.462	0.359	0.244	0.266	0.279	0.408	0.378	0.258
0.661	0.522	0.488	0.668	0.507	0.32	1	0.53	0.573	0.592	0.477	0.532	0.521	0.489	0.495	0.52	0.511	0.59	0.513	0.493	0.718	0.487	0.516	0.631	0.46	0.457	0.47	0.674	0.682	0.782	0.534	0.568	0.63	0.566	0.551	0.708	0.585	0.685	0.525	0.674	0.678	0.646	0.536	0.615	0.475	0.724	0.663	0.458	0.69	0.616
0.609	0.628	0.729	0.543	0.685	0.443	0.53	1	0.598	0.673	0.57	0.616	0.644	0.429	0.698	0.622	0.636	0.594	0.644	0.48	0.582	0.653	0.631	0.484	0.639	0.665	0.669	0.701	0.54	0.516	0.688	0.528	0.456	0.626	0.629	0.624	0.566	0.654	0.627	0.665	0.629	0.469	0.757	0.557	0.468	0.538	0.533	0.647	0.56	0.521
0.555	0.576	0.616	0.527	0.575	0.271	0.573	0.598	1	0.563	0.483	0.579	0.693	0.395	0.568	0.578	0.533	0.62	0.528	0.546	0.632	0.589	0.485	0.588	0.602	0.547	0.564	0.691	0.595	0.545	0.522	0.555	0.595	0.519	0.564	0.641	0.561	0.703	0.489	0.715	0.618	0.486	0.54	0.647	0.561	0.712	0.62	0.489	0.604	0.691
0.714	0.63	0.701	0.519	0.798	0.439	0.592	0.673	0.563	1	0.618	0.752	0.715	0.42	0.792	0.775	0.676	0.58	0.723	0.492	0.562	0.76	0.707	0.55	0.653	0.647	0.767	0.608	0.521	0.577	0.7	0.533	0.607	0.64	0.596	0.566	0.548	0.598	0.67	0.622	0.554	0.455	0.717	0.55	0.519	0.613	0.598	0.673	0.588	0.584
0.64	0.53	0.621	0.471	0.684	0.456	0.477	0.57	0.483	0.618	1	0.621	0.619	0.415	0.697	0.713	0.642	0.51	0.595	0.405	0.534	0.73	0.751	0.486	0.568	0.637	0.787	0.515	0.511	0.449	0.646	0.468	0.421	0.685	0.536	0.481	0.503	0.478	0.821	0.496	0.505	0.451	0.575	0.458	0.354	0.479	0.464	0.596	0.519	0.457
0.737	0.66	0.658	0.468	0.682	0.403	0.532	0.616	0.579	0.752	0.621	1	0.786	0.357	0.658	0.805	0.704	0.517	0.679	0.468	0.547	0.701	0.672	0.566	0.726	0.636	0.71	0.533	0.491	0.496	0.629	0.541	0.529	0.637	0.542	0.503	0.557	0.53	0.62	0.565	0.466	0.435	0.688	0.531	0.48	0.598	0.606	0.623	0.585	0.618
0.684	0.714	0.756	0.454	0.689	0.382	0.521	0.644	0.693	0.715	0.619	0.786	1	0.364	0.683	0.797	0.64	0.527	0.628	0.482	0.585	0.724	0.647	0.504	0.743	0.649	0.712	0.602	0.512	0.488	0.633	0.53	0.522	0.641	0.583	0.565	0.558	0.585	0.618	0.642	0.523	0.455	0.67	0.577	0.496	0.607	0.575	0.633	0.581	0.615
0.39	0.366	0.41	0.585	0.459	0.423	0.489	0.429	0.395	0.42	0.415	0.357	0.364	1	0.462	0.378	0.413	0.518	0.398	0.497	0.505	0.389	0.439	0.437	0.332	0.356	0.43	0.517	0.59	0.536	0.447	0.447	0.466	0.469	0.522	0.48	0.453	0.519	0.444	0.514	0.518	0.547	0.401	0.543	0.286	0.391	0.355	0.343	0.514	0.371
0.63	0.613	0.744	0.473	0.953	0.463	0.495	0.698	0.568	0.792	0.697	0.658	0.683	0.462	1	0.742	0.702	0.614	0.67	0.473	0.536	0.783	0.72	0.483	0.647	0.653	0.887	0.62	0.531	0.485	0.75	0.49	0.512	0.7	0.637	0.559	0.536	0.572	0.831	0.621	0.606	0.463	0.705	0.566	0.449	0.552	0.547	0.697	0.55	0.513
0.685	0.639	0.713	0.419	0.762	0.43	0.52	0.622	0.578	0.775	0.713	0.805	0.797	0.378	0.742	1	0.635	0.51	0.674	0.471	0.558	0.847	0.772	0.504	0.676	0.742	0.837	0.562	0.5	0.494	0.681	0.529	0.528	0.62	0.564	0.523	0.561	0.552	0.668	0.576	0.505	0.451	0.678	0.536	0.483	0.592	0.567	0.688	0.573	0.587
0.74	0.564	0.676	0.555	0.702	0.484	0.511	0.636	0.533	0.676	0.642	0.704	0.64	0.413	0.702	0.635	1	0.564	0.665	0.43	0.502	0.629	0.614	0.578	0.66	0.675	0.711	0.524	0.484	0.466	0.649	0.424	0.512	0.604	0.587	0.504	0.464	0.569	0.659	0.533	0.579	0.456	0.626	0.551	0.478	0.561	0.549	0.614	0.516	0.562
0.493	0.619	0.579	0.574	0.609	0.346	0.59	0.594	0.62	0.58	0.51	0.517	0.527	0.518	0.614	0.51	0.564	1	0.509	0.541	0.59	0.522	0.491	0.558	0.533	0.524	0.581	0.684	0.605	0.527	0.571	0.484	0.506	0.56	0.613	0.747	0.484	0.695	0.537	0.677	0.725	0.585	0.581	0.659	0.498	0.626	0.659	0.531	0.566	0.569
0.712	0.619	0.735	0.473	0.67	0.452	0.513	0.644	0.528	0.723	0.595	0.679	0.628	0.398	0.67	0.674	0.665	0.509	1	0.486	0.516	0.696	0.659	0.546	0.581	0.634	0.686	0.55	0.48	0.542	0.639	0.512	0.649	0.556	0.535	0.528	0.54	0.565	0.63	0.547	0.504	0.443	0.622	0.47	0.455	0.581	0.579	0.581	0.536	0.527
0.449	0.445	0.496	0.521	0.486	0.357	0.493	0.48	0.546	0.492	0.405	0.468	0.482	0.497	0.473	0.471	0.43	0.541	0.486	1	0.552	0.446	0.455	0.507	0.446	0.422	0.446	0.557	0.531	0.555	0.422	0.519	0.529	0.451	0.487	0.538	0.512	0.582	0.432	0.574	0.496	0.485	0.466	0.481	0.466	0.502	0.47	0.45	0.533	0.476
0.614	0.541	0.552	0.618	0.532	0.355	0.718	0.582	0.632	0.562	0.534	0.547	0.585	0.505	0.536	0.558	0.502	0.59	0.516	0.552	1	0.506	0.586	0.64	0.53	0.487	0.509	0.735	0.729	0.701	0.527	0.688	0.585	0.626	0.588	0.705	0.724	0.739	0.576	0.75	0.615	0.655	0.587	0.615	0.469	0.629	0.598	0.463	0.886	0.617
0.647	0.616	0.746	0.41	0.789	0.422	0.487	0.653	0.589	0.76	0.73	0.701	0.724	0.389	0.783	0.847	0.629	0.522	0.696	0.446	0.506	1	0.749	0.492	0.664	0.764	0.871	0.584	0.465	0.458	0.682	0.493	0.51	0.585	0.561	0.525	0.52	0.548	0.688	0.573	0.529	0.405	0.667	0.509	0.476	0.577	0.536	0.703	0.52	0.541
0.663	0.598	0.656	0.446	0.707	0.479	0.516	0.631	0.485	0.707	0.751	0.672	0.647	0.439	0.72	0.772	0.614	0.491	0.659	0.455	0.586	0.749	1	0.5	0.57	0.661	0.778	0.558	0.496	0.484	0.638	0.531	0.46	0.658	0.538	0.52	0.586	0.536	0.749	0.549	0.486	0.452	0.645	0.464	0.359	0.486	0.475	0.705	0.594	0.448
0.662	0.47	0.513	0.583	0.485	0.347	0.631	0.484	0.588	0.55	0.486	0.566	0.504	0.437	0.483	0.504	0.578	0.558	0.546	0.507	0.64	0.492	0.5	1	0.51	0.518	0.484	0.59	0.55	0.606	0.461	0.554	0.587	0.494	0.536	0.562	0.547	0.608	0.504	0.584	0.52	0.484	0.51	0.517	0.519	0.634	0.607	0.433	0.652	0.66
0.645	0.685	0.659	0.416	0.641	0.367	0.46	0.639	0.602	0.653	0.568	0.726	0.743	0.332	0.647	0.676	0.66	0.533	0.581	0.446	0.53	0.664	0.57	0.51	1	0.622	0.655	0.539	0.432	0.425	0.579	0.488	0.435	0.573	0.509	0.502	0.498	0.535	0.584	0.566	0.478	0.391	0.697	0.498	0.502	0.546	0.564	0.628	0.544	0.578
0.638	0.578	0.72	0.414	0.66	0.481	0.457	0.665	0.547	0.647	0.637	0.636	0.649	0.356	0.653	0.742	0.675	0.524	0.634	0.422	0.487	0.764	0.661	0.518	0.622	1	0.726	0.563	0.415	0.412	0.597	0.412	0.459	0.522	0.579	0.502	0.428	0.559	0.585	0.54	0.557	0.373	0.634	0.504	0.525	0.55	0.51	0.646	0.496	0.532
0.638	0.61	0.74	0.442	0.869	0.465	0.47	0.669	0.564	0.767	0.787	0.71	0.712	0.43	0.887	0.837	0.711	0.581	0.686	0.446	0.509	0.871	0.778	0.484	0.655	0.726	1	0.584	0.498	0.447	0.759	0.472	0.49	0.642	0.615	0.527	0.512	0.538	0.764	0.574	0.572	0.435	0.682	0.54	0.457	0.56	0.544	0.725	0.523	0.515
0.551	0.55	0.652	0.599	0.602	0.34	0.674	0.701	0.691	0.608	0.515	0.533	0.602	0.517	0.62	0.562	0.524	0.684	0.55	0.557	0.735	0.584	0.558	0.59	0.539	0.563	0.584	1	0.657	0.678	0.585	0.57	0.581	0.55	0.69	0.851	0.601	0.812	0.555	0.897	0.732	0.563	0.634	0.639	0.517	0.693	0.614	0.56	0.665	0.613
0.535	0.462	0.484	0.683	0.544	0.386	0.682	0.54	0.595	0.521	0.511	0.491	0.512	0.59	0.531	0.5	0.484	0.605	0.48	0.531	0.729	0.465	0.496	0.55	0.432	0.415	0.498	0.657	1	0.732	0.543	0.613	0.564	0.648	0.59	0.632	0.619	0.668	0.541	0.65	0.624	0.703	0.528	0.646	0.419	0.547	0.512	0.392	0.698	0.528
0.612	0.446	0.49	0.732	0.492	0.361	0.782	0.516	0.545	0.577	0.449	0.496	0.488	0.536	0.485	0.494	0.466	0.527	0.542	0.555	0.701	0.458	0.484	0.606	0.425	0.412	0.447	0.678	0.732	1	0.479	0.596	0.707	0.537	0.519	0.644	0.615	0.649	0.489	0.67	0.562	0.604	0.506	0.545	0.445	0.598	0.575	0.39	0.653	0.571
0.63	0.625	0.653	0.473	0.755	0.495	0.534	0.688	0.522	0.7	0.646	0.629	0.633	0.447	0.75	0.681	0.649	0.571	0.639	0.422	0.527	0.682	0.638	0.461	0.579	0.597	0.759	0.585	0.543	0.479	1	0.528	0.477	0.656	0.667	0.58	0.573	0.57	0.709	0.582	0.602	0.521	0.683	0.643	0.414	0.568	0.542	0.648	0.545	0.49
0.546	0.541	0.5	0.498	0.517	0.397	0.568	0.528	0.555	0.533	0.468	0.541	0.53	0.447	0.49	0.529	0.424	0.484	0.512	0.519	0.688	0.493	0.531	0.554	0.488	0.412	0.472	0.57	0.613	0.596	0.528	1	0.522	0.567	0.514	0.553	0.883	0.572	0.514	0.603	0.473	0.581	0.534	0.514	0.365	0.489	0.503	0.432	0.729	0.478
0.609	0.45	0.559	0.567	0.519	0.276	0.63	0.456	0.595	0.607	0.421	0.529	0.522	0.466	0.512	0.528	0.512	0.506	0.649	0.529	0.585	0.51	0.46	0.587	0.435	0.459	0.49	0.581	0.564	0.707	0.477	0.522	1	0.467	0.529	0.555	0.528	0.63	0.454	0.591	0.513	0.49	0.454	0.542	0.495	0.656	0.627	0.418	0.573	0.605
0.65	0.58	0.567	0.556	0.699	0.459	0.566	0.626	0.519	0.64	0.685	0.637	0.641	0.469	0.7	0.62	0.604	0.56	0.556	0.451	0.626	0.585	0.658	0.494	0.573	0.522	0.642	0.55	0.648	0.537	0.656	0.567	0.467	1	0.586	0.535	0.611	0.6	0.779	0.581	0.507	0.551	0.652	0.586	0.364	0.481	0.5	0.529	0.622	0.47
0.53	0.507	0.629	0.56	0.625	0.437	0.551	0.629	0.564	0.596	0.536	0.542	0.583	0.522	0.637	0.564	0.587	0.613	0.535	0.487	0.588	0.561	0.538	0.536	0.509	0.579	0.615	0.69	0.59	0.519	0.667	0.514	0.529	0.586	1	0.618	0.542	0.642	0.569	0.668	0.679	0.507	0.602	0.664	0.469	0.566	0.509	0.529	0.558	0.542
0.529	0.612	0.583	0.572	0.555	0.32	0.708	0.624	0.641	0.566	0.481	0.503	0.565	0.48	0.559	0.523	0.504	0.747	0.528	0.538	0.705	0.525	0.52	0.562	0.502	0.502	0.527	0.851	0.632	0.644	0.58	0.553	0.555	0.535	0.618	1	0.576	0.776	0.518	0.82	0.726	0.615	0.573	0.631	0.473	0.674	0.645	0.517	0.64	0.566
0.575	0.54	0.522	0.515	0.559	0.398	0.585	0.566	0.561	0.548	0.503	0.557	0.558	0.453	0.536	0.561	0.464	0.484	0.54	0.512	0.724	0.52	0.586	0.547	0.498	0.428	0.512	0.601	0.619	0.615	0.573	0.883	0.528	0.611	0.542	0.576	1	0.59	0.561	0.628	0.495	0.592	0.56	0.52	0.372	0.5	0.524	0.46	0.742	0.489
0.586	0.574	0.626	0.602	0.573	0.331	0.685	0.654	0.703	0.598	0.478	0.53	0.585	0.519	0.572	0.552	0.569	0.695	0.565	0.582	0.739	0.548	0.536	0.608	0.535	0.559	0.538	0.812	0.668	0.649	0.57	0.572	0.63	0.6	0.642	0.776	0.59	1	0.528	0.782	0.688	0.585	0.63	0.709	0.543	0.696	0.597	0.516	0.692	0.638
0.684	0.569	0.645	0.487	0.808	0.489	0.525	0.627	0.489	0.67	0.821	0.62	0.618	0.444	0.831	0.668	0.659	0.537	0.63	0.432	0.576	0.688	0.749	0.504	0.584	0.585	0.764	0.555	0.541	0.489	0.709	0.514	0.454	0.779	0.569	0.518	0.561	0.528	1	0.552	0.538	0.471	0.641	0.498	0.36	0.489	0.488	0.623	0.591	0.468
0.542	0.563	0.652	0.615	0.615	0.327	0.674	0.665	0.715	0.622	0.496	0.565	0.642	0.514	0.621	0.576	0.533	0.677	0.547	0.574	0.75	0.573	0.549	0.584	0.566	0.54	0.574	0.897	0.65	0.67	0.582	0.603	0.591	0.581	0.668	0.82	0.628	0.782	0.552	1	0.7	0.566	0.622	0.682	0.514	0.677	0.615	0.534	0.681	0.615
0.475	0.545	0.595	0.634	0.601	0.382	0.678	0.629	0.618	0.554	0.505	0.466	0.523	0.518	0.606	0.505	0.579	0.725	0.504	0.496	0.615	0.529	0.486	0.52	0.478	0.557	0.572	0.732	0.624	0.562	0.602	0.473	0.513	0.507	0.679	0.726	0.495	0.688	0.538	0.7	1	0.649	0.555	0.687	0.491	0.659	0.6	0.543	0.583	0.565
0.467	0.505	0.444	0.645	0.475	0.362	0.646	0.469	0.486	0.455	0.451	0.435	0.455	0.547	0.463	0.451	0.456	0.585	0.443	0.485	0.655	0.405	0.452	0.484	0.391	0.373	0.435	0.563	0.703	0.604	0.521	0.581	0.49	0.551	0.507	0.615	0.592	0.585	0.471	0.566	0.649	1	0.457	0.635	0.376	0.533	0.54	0.406	0.622	0.487
0.643	0.652	0.668	0.493	0.692	0.462	0.536	0.757	0.54	0.717	0.575	0.688	0.67	0.401	0.705	0.678	0.626	0.581	0.622	0.466	0.587	0.667	0.645	0.51	0.697	0.634	0.682	0.634	0.528	0.506	0.683	0.534	0.454	0.652	0.602	0.573	0.56	0.63	0.641	0.622	0.555	0.457	1	0.573	0.466	0.543	0.56	0.649	0.602	0.538
0.507	0.532	0.553	0.592	0.578	0.359	0.615	0.557	0.647	0.55	0.458	0.531	0.577	0.543	0.566	0.536	0.551	0.659	0.47	0.481	0.615	0.509	0.464	0.517	0.498	0.504	0.54	0.639	0.646	0.545	0.643	0.514	0.542	0.586	0.664	0.631	0.52	0.709	0.498	0.682	0.687	0.635	0.573	1	0.476	0.651	0.607	0.503	0.611	0.626
0.486	0.423	0.512	0.425	0.457	0.244	0.475	0.468	0.561	0.519	0.354	0.48	0.496	0.286	0.449	0.483	0.478	0.498	0.455	0.466	0.469	0.476	0.359	0.519	0.502	0.525	0.457	0.517	0.419	0.445	0.414	0.365	0.495	0.364	0.469	0.473	0.372	0.543	0.36	0.514	0.491	0.376	0.466	0.476	1	0.556	0.515	0.421	0.45	0.581
0.622	0.566	0.582	0.525	0.559	0.266	0.724	0.538	0.712	0.613	0.479	0.598	0.607	0.391	0.552	0.592	0.561	0.626	0.581	0.502	0.629	0.577	0.486	0.634	0.546	0.55	0.56	0.693	0.547	0.598	0.568	0.489	0.656	0.481	0.566	0.674	0.5	0.696	0.489	0.677	0.659	0.533	0.543	0.651	0.556	1	0.751	0.538	0.604	0.731
0.612	0.597	0.568	0.515	0.538	0.279	0.663	0.533	0.62	0.598	0.464	0.606	0.575	0.355	0.547	0.567	0.549	0.659	0.579	0.47	0.598	0.536	0.475	0.607	0.564	0.51	0.544	0.614	0.512	0.575	0.542	0.503	0.627	0.5	0.509	0.645	0.524	0.597	0.488	0.615	0.6	0.54	0.56	0.607	0.515	0.751	1	0.523	0.587	0.661
0.566	0.608	0.673	0.383	0.691	0.408	0.458	0.647	0.489	0.673	0.596	0.623	0.633	0.343	0.697	0.688	0.614	0.531	0.581	0.45	0.463	0.703	0.705	0.433	0.628	0.646	0.725	0.56	0.392	0.39	0.648	0.432	0.418	0.529	0.529	0.517	0.46	0.516	0.623	0.534	0.543	0.406	0.649	0.503	0.421	0.538	0.523	1	0.47	0.469
0.638	0.565	0.523	0.577	0.57	0.378	0.69	0.56	0.604	0.588	0.519	0.585	0.581	0.514	0.55	0.573	0.516	0.566	0.536	0.533	0.886	0.52	0.594	0.652	0.544	0.496	0.523	0.665	0.698	0.653	0.545	0.729	0.573	0.622	0.558	0.64	0.742	0.692	0.591	0.681	0.583	0.622	0.602	0.611	0.45	0.604	0.587	0.47	1	0.591
0.591	0.519	0.545	0.545	0.515	0.258	0.616	0.521	0.691	0.584	0.457	0.618	0.615	0.371	0.513	0.587	0.562	0.569	0.527	0.476	0.617	0.541	0.448	0.66	0.578	0.532	0.515	0.613	0.528	0.571	0.49	0.478	0.605	0.47	0.542	0.566	0.489	0.638	0.468	0.615	0.565	0.487	0.538	0.626	0.581	0.731	0.661	0.469	0.591	1
0.533	0.579	0.577	0.504	0.536	0.278	0.64	0.531	0.73	0.554	0.46	0.581	0.658	0.402	0.529	0.569	0.53	0.636	0.49	0.493	0.604	0.547	0.478	0.584	0.534	0.558	0.537	0.66	0.555	0.521	0.547	0.481	0.575	0.489	0.573	0.688	0.481	0.64	0.455	0.692	0.665	0.551	0.504	0.686	0.518	0.72	0.664	0.532	0.57	0.668
0.575	0.559	0.524	0.486	0.524	0.25	0.67	0.507	0.686	0.587	0.461	0.596	0.574	0.354	0.528	0.578	0.541	0.631	0.531	0.443	0.621	0.545	0.468	0.624	0.538	0.51	0.535	0.617	0.506	0.547	0.514	0.476	0.601	0.469	0.51	0.651	0.487	0.634	0.472	0.618	0.615	0.519	0.542	0.583	0.539	0.766	0.728	0.493	0.581	0.722
0.369	0.48	0.398	0.335	0.384	0.229	0.395	0.417	0.384	0.388	0.299	0.398	0.391	0.233	0.375	0.369	0.402	0.494	0.367	0.313	0.387	0.348	0.355	0.343	0.434	0.392	0.352	0.403	0.344	0.302	0.397	0.326	0.29	0.328	0.331	0.502	0.337	0.442	0.341	0.41	0.437	0.36	0.432	0.404	0.385	0.386	0.435	0.412	0.412	0.389
0.578	0.518	0.525	0.631	0.548	0.414	0.662	0.556	0.548	0.584	0.455	0.563	0.528	0.594	0.529	0.55	0.506	0.588	0.538	0.628	0.714	0.481	0.559	0.615	0.492	0.449	0.496	0.63	0.727	0.69	0.53	0.672	0.568	0.593	0.547	0.607	0.685	0.687	0.521	0.645	0.558	0.698	0.573	0.628	0.459	0.532	0.545	0.451	0.77	0.559
0.471	0.525	0.522	0.562	0.602	0.329	0.554	0.549	0.625	0.564	0.469	0.525	0.546	0.573	0.585	0.524	0.479	0.65	0.471	0.562	0.602	0.509	0.456	0.504	0.509	0.45	0.543	0.672	0.624	0.548	0.572	0.591	0.534	0.566	0.63	0.624	0.579	0.654	0.498	0.714	0.598	0.568	0.549	0.655	0.447	0.574	0.514	0.442	0.598	0.517
0.613	0.598	0.737	0.603	0.698	0.504	0.555	0.69	0.541	0.634	0.65	0.601	0.675	0.52	0.698	0.607	0.66	0.561	0.61	0.479	0.579	0.638	0.654	0.484	0.563	0.602	0.668	0.622	0.642	0.529	0.669	0.518	0.466	0.679	0.64	0.583	0.534	0.591	0.694	0.636	0.62	0.551	0.659	0.595	0.406	0.487	0.455	0.587	0.574	0.47
0.59	0.548	0.536	0.529	0.567	0.399	0.594	0.575	0.577	0.561	0.515	0.57	0.571	0.461	0.544	0.575	0.476	0.491	0.553	0.521	0.729	0.527	0.583	0.556	0.511	0.434	0.524	0.604	0.63	0.626	0.575	0.89	0.543	0.62	0.55	0.585	0.973	0.6	0.569	0.638	0.502	0.589	0.562	0.527	0.378	0.513	0.537	0.461	0.756	0.496
0.538	0.489	0.53	0.667	0.506	0.351	0.683	0.543	0.578	0.535	0.446	0.515	0.533	0.613	0.492	0.532	0.462	0.569	0.5	0.598	0.758	0.455	0.516	0.577	0.455	0.426	0.46	0.665	0.773	0.734	0.491	0.64	0.6	0.582	0.547	0.639	0.654	0.711	0.485	0.681	0.572	0.745	0.525	0.638	0.447	0.544	0.526	0.411	0.734	0.566
0.562	0.623	0.668	0.42	0.68	0.376	0.475	0.68	0.522	0.614	0.588	0.582	0.633	0.357	0.707	0.599	0.637	0.595	0.56	0.434	0.47	0.635	0.579	0.45	0.634	0.619	0.683	0.567	0.421	0.387	0.637	0.381	0.401	0.566	0.552	0.563	0.428	0.51	0.622	0.528	0.605	0.479	0.609	0.54	0.45	0.568	0.596	0.723	0.455	0.481
0.566	0.546	0.662	0.433	0.61	0.411	0.464	0.64	0.615	0.629	0.582	0.62	0.651	0.387	0.642	0.653	0.582	0.526	0.603	0.469	0.528	0.69	0.573	0.507	0.632	0.668	0.672	0.594	0.464	0.47	0.593	0.483	0.513	0.529	0.621	0.529	0.506	0.548	0.563	0.596	0.533	0.404	0.643	0.512	0.512	0.559	0.535	0.568	0.479	0.554
0.662	0.676	0.736	0.438	0.676	0.402	0.531	0.688	0.583	0.676	0.58	0.653	0.7	0.372	0.669	0.68	0.685	0.593	0.679	0.473	0.504	0.703	0.613	0.528	0.68	0.721	0.699	0.577	0.445	0.438	0.673	0.434	0.465	0.53	0.554	0.566	0.455	0.573	0.603	0.573	0.617	0.462	0.65	0.573	0.521	0.687	0.612	0.727	0.531	0.547
0.628	0.639	0.781	0.436	0.786	0.432	0.491	0.724	0.578	0.765	0.749	0.7	0.722	0.379	0.794	0.828	0.63	0.559	0.702	0.48	0.545	0.894	0.789	0.478	0.658	0.746	0.873	0.645	0.487	0.492	0.676	0.502	0.502	0.598	0.563	0.562	0.55	0.563	0.701	0.6	0.555	0.434	0.711	0.486	0.468	0.567	0.561	0.741	0.535	0.527
0.496	0.486	0.56	0.498	0.502	0.225	0.559	0.558	0.663	0.532	0.431	0.5	0.568	0.352	0.506	0.516	0.5	0.607	0.454	0.485	0.602	0.486	0.437	0.512	0.542	0.498	0.484	0.653	0.55	0.529	0.451	0.44	0.512	0.466	0.492	0.598	0.457	0.673	0.453	0.654	0.59	0.465	0.533	0.605	0.587	0.605	0.567	0.476	0.545	0.695
0.516	0.535	0.564	0.559	0.515	0.265	0.653	0.533	0.599	0.622	0.412	0.513	0.523	0.412	0.519	0.5	0.508	0.664	0.558	0.537	0.561	0.5	0.453	0.541	0.506	0.475	0.498	0.651	0.556	0.616	0.485	0.445	0.629	0.445	0.5	0.686	0.456	0.624	0.432	0.644	0.642	0.552	0.5	0.542	0.558	0.656	0.669	0.522	0.511	0.608
0.34	0.352	0.387	0.527	0.398	0.43	0.498	0.379	0.37	0.383	0.347	0.327	0.337	0.545	0.406	0.332	0.425	0.468	0.365	0.418	0.437	0.335	0.352	0.397	0.267	0.355	0.381	0.456	0.478	0.477	0.417	0.363	0.418	0.368	0.478	0.482	0.364	0.444	0.368	0.455	0.612	0.529	0.355	0.485	0.315	0.409	0.402	0.342	0.426	0.359
0.625	0.598	0.746	0.4	0.773	0.416	0.473	0.655	0.562	0.76	0.731	0.696	0.718	0.389	0.789	0.844	0.639	0.523	0.672	0.45	0.513	0.878	0.763	0.477	0.648	0.733	0.89	0.589	0.452	0.451	0.678	0.465	0.494	0.568	0.566	0.531	0.5	0.542	0.678	0.579	0.524	0.395	0.669	0.495	0.461	0.564	0.531	0.711	0.51	0.524
0.519	0.474	0.53	0.55	0.5	0.485	0.541	0.574	0.465	0.489	0.463	0.465	0.479	0.569	0.492	0.485	0.446	0.474	0.55	0.588	0.604	0.472	0.522	0.462	0.417	0.458	0.45	0.564	0.614	0.641	0.507	0.57	0.502	0.556	0.533	0.545	0.596	0.566	0.519	0.58	0.498	0.55	0.525	0.496	0.342	0.443	0.434	0.413	0.577	0.407
0.577	0.469	0.569	0.571	0.565	0.328	0.596	0.518	0.67	0.577	0.561	0.544	0.538	0.458	0.595	0.519	0.614	0.594	0.575	0.457	0.618	0.545	0.51	0.646	0.479	0.522	0.598	0.637	0.59	0.547	0.534	0.479	0.637	0.532	0.627	0.592	0.49	0.64	0.561	0.615	0.642	0.488	0.496	0.62	0.485	0.673	0.602	0.48	0.576	0.653
[truncated: 18 more columns]

## Sheet: target similarity
6431	535	535	535	535	535	535	535	535	535	535	535	535	535	535	535	508	307	299	261	235	304.5	253	188	299	282	312	411.5	430.5	412	375.5	563	518	511.5	340	313.5	298.5	336	2412.5	242.5	300	289.5	454.5	293	348	348	287.5	619	539	269.5
535	7511	7511	7511	7511	7511	7511	7511	7511	7511	7511	7511	7511	7511	7511	7511	3859	452.5	452.5	363.5	354.5	426	249.5	237	380.5	397	390	912	470.5	459	522.5	607.5	549.5	547	422	377	346	948	339.5	1202.5	447.5	433.5	565	1079	569	569	1036.5	682.5	585.5	1221.5
535	7511	7511	7511	7511	7511	7511	7511	7511	7511	7511	7511	7511	7511	7511	7511	3859	452.5	452.5	363.5	354.5	426	249.5	237	380.5	397	390	912	470.5	459	522.5	607.5	549.5	547	422	377	346	948	339.5	1202.5	447.5	433.5	565	1079	569	569	1036.5	682.5	585.5	1221.5
535	7511	7511	7511	7511	7511	7511	7511	7511	7511	7511	7511	7511	7511	7511	7511	3859	452.5	452.5	363.5	354.5	426	249.5	237	380.5	397	390	912	470.5	459	522.5	607.5	549.5	547	422	377	346	948	339.5	1202.5	447.5	433.5	565	1079	569	569	1036.5	682.5	585.5	1221.5
535	7511	7511	7511	7511	7511	7511	7511	7511	7511	7511	7511	7511	7511	7511	7511	3859	452.5	452.5	363.5	354.5	426	249.5	237	380.5	397	390	912	470.5	459	522.5	607.5	549.5	547	422	377	346	948	339.5	1202.5	447.5	433.5	565	1079	569	569	1036.5	682.5	585.5	1221.5
535	7511	7511	7511	7511	7511	7511	7511	7511	7511	7511	7511	7511	7511	7511	7511	3859	452.5	452.5	363.5	354.5	426	249.5	237	380.5	397	390	912	470.5	459	522.5	607.5	549.5	547	422	377	346	948	339.5	1202.5	447.5	433.5	565	1079	569	569	1036.5	682.5	585.5	1221.5
535	7511	7511	7511	7511	7511	7511	7511	7511	7511	7511	7511	7511	7511	7511	7511	3859	452.5	452.5	363.5	354.5	426	249.5	237	380.5	397	390	912	470.5	459	522.5	607.5	549.5	547	422	377	346	948	339.5	1202.5	447.5	433.5	565	1079	569	569	1036.5	682.5	585.5	1221.5
535	7511	7511	7511	7511	7511	7511	7511	7511	7511	7511	7511	7511	7511	7511	7511	3859	452.5	452.5	363.5	354.5	426	249.5	237	380.5	397	390	912	470.5	459	522.5	607.5	549.5	547	422	377	346	948	339.5	1202.5	447.5	433.5	565	1079	569	569	1036.5	682.5	585.5	1221.5
535	7511	7511	7511	7511	7511	7511	7511	7511	7511	7511	7511	7511	7511	7511	7511	3859	452.5	452.5	363.5	354.5	426	249.5	237	380.5	397	390	912	470.5	459	522.5	607.5	549.5	547	422	377	346	948	339.5	1202.5	447.5	433.5	565	1079	569	569	1036.5	682.5	585.5	1221.5
535	7511	7511	7511	7511	7511	7511	7511	7511	7511	7511	7511	7511	7511	7511	7511	3859	452.5	452.5	363.5	354.5	426	249.5	237	380.5	397	390	912	470.5	459	522.5	607.5	549.5	547	422	377	346	948	339.5	1202.5	447.5	433.5	565	1079	569	569	1036.5	682.5	585.5	1221.5
535	7511	7511	7511	7511	7511	7511	7511	7511	7511	7511	7511	7511	7511	7511	7511	3859	452.5	452.5	363.5	354.5	426	249.5	237	380.5	397	390	912	470.5	459	522.5	607.5	549.5	547	422	377	346	948	339.5	1202.5	447.5	433.5	565	1079	569	569	1036.5	682.5	585.5	1221.5
535	7511	7511	7511	7511	7511	7511	7511	7511	7511	7511	7511	7511	7511	7511	7511	3859	452.5	452.5	363.5	354.5	426	249.5	237	380.5	397	390	912	470.5	459	522.5	607.5	549.5	547	422	377	346	948	339.5	1202.5	447.5	433.5	565	1079	569	569	1036.5	682.5	585.5	1221.5
535	7511	7511	7511	7511	7511	7511	7511	7511	7511	7511	7511	7511	7511	7511	7511	3859	452.5	452.5	363.5	354.5	426	249.5	237	380.5	397	390	912	470.5	459	522.5	607.5	549.5	547	422	377	346	948	339.5	1202.5	447.5	433.5	565	1079	569	569	1036.5	682.5	585.5	1221.5
535	7511	7511	7511	7511	7511	7511	7511	7511	7511	7511	7511	7511	7511	7511	7511	3859	452.5	452.5	363.5	354.5	426	249.5	237	380.5	397	390	912	470.5	459	522.5	607.5	549.5	547	422	377	346	948	339.5	1202.5	447.5	433.5	565	1079	569	569	1036.5	682.5	585.5	1221.5
535	7511	7511	7511	7511	7511	7511	7511	7511	7511	7511	7511	7511	7511	7511	7511	3859	452.5	452.5	363.5	354.5	426	249.5	237	380.5	397	390	912	470.5	459	522.5	607.5	549.5	547	422	377	346	948	339.5	1202.5	447.5	433.5	565	1079	569	569	1036.5	682.5	585.5	1221.5
535	7511	7511	7511	7511	7511	7511	7511	7511	7511	7511	7511	7511	7511	7511	7511	3859	452.5	452.5	363.5	354.5	426	249.5	237	380.5	397	390	912	470.5	459	522.5	607.5	549.5	547	422	377	346	948	339.5	1202.5	447.5	433.5	565	1079	569	569	1036.5	682.5	585.5	1221.5
508	3859	3859	3859	3859	3859	3859	3859	3859	3859	3859	3859	3859	3859	3859	3859	7653	431	453	338.5	320	388	241	245.5	385.5	415.5	384.5	878	434	453	526.5	588.5	539	562.5	402	389	360	883.5	364.5	1223.5	422.5	410.5	575	1061.5	563	563	1032.5	652.5	592	1195
307	452.5	452.5	452.5	452.5	452.5	452.5	452.5	452.5	452.5	452.5	452.5	452.5	452.5	452.5	452.5	431	3490	1554	858	885	2016.5	157	196	307	312.5	329.5	428.5	317	290	279.5	335	353	403.5	358	356	315.5	420.5	277	385	1636.5	1639	829	426.5	433.5	433.5	389.5	291	312	388
299	452.5	452.5	452.5	452.5	452.5	452.5	452.5	452.5	452.5	452.5	452.5	452.5	452.5	452.5	452.5	453	1554	3453	893.5	878	1486	156.5	155.5	300.5	307	312.5	350	283.5	283	246.5	314	328.5	365.5	316	311	237.5	363.5	285.5	366	1610.5	1660	789	378.5	438	438	366.5	269.5	264	387.5
261	363.5	363.5	363.5	363.5	363.5	363.5	363.5	363.5	363.5	363.5	363.5	363.5	363.5	363.5	363.5	338.5	858	893.5	3558	2536	836.5	145	150	284	297.5	251	374.5	286.5	293.5	320	302	354.5	369.5	294.5	263	237.5	371.5	207.5	332	974	940	1108.5	342	375.5	375.5	331	307.5	265.5	338.5
235	354.5	354.5	354.5	354.5	354.5	354.5	354.5	354.5	354.5	354.5	354.5	354.5	354.5	354.5	354.5	320	885	878	2536	3588	822	173	191.5	281.5	311	255.5	351.5	296	308	319.5	303.5	345.5	372	296.5	294.5	254.5	294.5	219.5	319	854.5	905.5	1129.5	355.5	379.5	379.5	344	328	264	332.5
304.5	426	426	426	426	426	426	426	426	426	426	426	426	426	426	426	388	2016.5	1486	836.5	822	3468	166	211	282.5	287	288	429	334	325	254.5	338.5	386	381	321	314	272.5	469	251	397	1502.5	1486	791	424	440	440	377.5	297	303.5	344.5
253	249.5	249.5	249.5	249.5	249.5	249.5	249.5	249.5	249.5	249.5	249.5	249.5	249.5	249.5	249.5	241	157	156.5	145	173	166	4310	2009	198.5	220.5	198.5	243.5	226	230.5	206.5	225	236.5	278	216	201.5	166.5	244.5	188	204	174.5	188.5	223.5	248.5	250	250	223	229.5	201	262
188	237	237	237	237	237	237	237	237	237	237	237	237	237	237	237	245.5	196	155.5	150	191.5	211	2009	3715	187	183.5	193.5	259	194	171.5	213.5	175	219.5	278.5	175.5	187.5	133.5	244.5	172	209.5	153	180.5	167	206.5	210	210	230	188	166	229.5
299	380.5	380.5	380.5	380.5	380.5	380.5	380.5	380.5	380.5	380.5	380.5	380.5	380.5	380.5	380.5	385.5	307	300.5	284	281.5	282.5	198.5	187	3247	2721.5	2709.5	333	594.5	575.5	289.5	621	472	466.5	560.5	576.5	543	370	318.5	309.5	301.5	340	404.5	327	405	405	334.5	562	540	386.5
282	397	397	397	397	397	397	397	397	397	397	397	397	397	397	397	415.5	312.5	307	297.5	311	287	220.5	183.5	2721.5	3247	2590	301.5	599.5	578	291	619.5	486	482	592.5	612	551.5	361	287	339	322.5	333	379	328.5	395.5	395.5	330	551	537.5	412
312	390	390	390	390	390	390	390	390	390	390	390	390	390	390	390	384.5	329.5	312.5	251	255.5	288	198.5	193.5	2709.5	2590	3253	329.5	589	562.5	298.5	635	507.5	482	572	622	570.5	378	280.5	320.5	290.5	325	361.5	340.5	412.5	412.5	299	560.5	546.5	409
411.5	912	912	912	912	912	912	912	912	912	912	912	912	912	912	912	878	428.5	350	374.5	351.5	429	243.5	259	333	301.5	329.5	11188	340	360	386.5	407	531.5	630	357	327	320.5	1051	348	703.5	403	430.5	482	761.5	605	605	681.5	389	365	822
430.5	470.5	470.5	470.5	470.5	470.5	470.5	470.5	470.5	470.5	470.5	470.5	470.5	470.5	470.5	470.5	434	317	283.5	286.5	296	334	226	194	594.5	599.5	589	340	3698	2838	373	951.5	488.5	450.5	549	517	531	361	451	359	310.5	322	414.5	394.5	370.5	370.5	385.5	1031.5	1025.5	334
412	459	459	459	459	459	459	459	459	459	459	459	459	459	459	459	453	290	283	293.5	308	325	230.5	171.5	575.5	578	562.5	360	2838	3703	361	909	469.5	416	538	493.5	510	357	413.5	338.5	329	319.5	384.5	385.5	358	358	365.5	1034	1049.5	348
375.5	522.5	522.5	522.5	522.5	522.5	522.5	522.5	522.5	522.5	522.5	522.5	522.5	522.5	522.5	522.5	526.5	279.5	246.5	320	319.5	254.5	206.5	213.5	289.5	291	298.5	386.5	373	361	5123	393.5	453	429.5	297	298	297.5	369	358	333	316.5	320	430	417	403	403	401.5	389.5	380.5	392.5
563	607.5	607.5	607.5	607.5	607.5	607.5	607.5	607.5	607.5	607.5	607.5	607.5	607.5	607.5	607.5	588.5	335	314	302	303.5	338.5	225	175	621	619.5	635	407	951.5	909	393.5	4417	466.5	498	565.5	600	583.5	380	549	373.5	305.5	296.5	400	382	350	350	400.5	952.5	902	385
518	549.5	549.5	549.5	549.5	549.5	549.5	549.5	549.5	549.5	549.5	549.5	549.5	549.5	549.5	549.5	539	353	328.5	354.5	345.5	386	236.5	219.5	472	486	507.5	531.5	488.5	469.5	453	466.5	9034	3922.5	461.5	399.5	413.5	436.5	460.5	363	336.5	326.5	562.5	425.5	506.5	506.5	395	452.5	444.5	429.5
511.5	547	547	547	547	547	547	547	547	547	547	547	547	547	547	547	562.5	403.5	365.5	369.5	372	381	278	278.5	466.5	482	482	630	450.5	416	429.5	498	3922.5	8704	480.5	412	406.5	535	458.5	362	344	374.5	530.5	400.5	551	551	379	532.5	502	381
340	422	422	422	422	422	422	422	422	422	422	422	422	422	422	422	402	358	316	294.5	296.5	321	216	175.5	560.5	592.5	572	357	549	538	297	565.5	461.5	480.5	2701	1396	1294	404.5	334.5	356	330.5	363	317	358	446	446	365.5	552.5	512	406
313.5	377	377	377	377	377	377	377	377	377	377	377	377	377	377	377	389	356	311	263	294.5	314	201.5	187.5	576.5	612	622	327	517	493.5	298	600	399.5	412	1396	2454	1548	379.5	307.5	328.5	321.5	363.5	296.5	315	415	415	364.5	558	510.5	380.5
298.5	346	346	346	346	346	346	346	346	346	346	346	346	346	346	346	360	315.5	237.5	237.5	254.5	272.5	166.5	133.5	543	551.5	570.5	320.5	531	510	297.5	583.5	413.5	406.5	1294	1548	1859	336.5	285.5	339	275.5	287	299	325.5	341.5	341.5	351.5	551.5	513.5	345.5
336	948	948	948	948	948	948	948	948	948	948	948	948	948	948	948	883.5	420.5	363.5	371.5	294.5	469	244.5	244.5	370	361	378	1051	361	357	369	380	436.5	535	404.5	379.5	336.5	6126	275	673	456	441.5	405	728	587.5	587.5	617	373	363	714.5
2412.5	339.5	339.5	339.5	339.5	339.5	339.5	339.5	339.5	339.5	339.5	339.5	339.5	339.5	339.5	339.5	364.5	277	285.5	207.5	219.5	251	188	172	318.5	287	280.5	348	451	413.5	358	549	460.5	458.5	334.5	307.5	285.5	275	4523	260	251.5	251.5	405.5	299.5	340	340	276	441	407	288
242.5	1202.5	1202.5	1202.5	1202.5	1202.5	1202.5	1202.5	1202.5	1202.5	1202.5	1202.5	1202.5	1202.5	1202.5	1202.5	1223.5	385	366	332	319	397	204	209.5	309.5	339	320.5	703.5	359	338.5	333	373.5	363	362	356	328.5	339	673	260	3430	447.5	448.5	338	1022	556.5	556.5	1164	379	350.5	1166.5
300	447.5	447.5	447.5	447.5	447.5	447.5	447.5	447.5	447.5	447.5	447.5	447.5	447.5	447.5	447.5	422.5	1636.5	1610.5	974	854.5	1502.5	174.5	153	301.5	322.5	290.5	403	310.5	329	316.5	305.5	336.5	344	330.5	321.5	275.5	456	251.5	447.5	3626	2531.5	800	400	472.5	472.5	455	297.5	298.5	415
289.5	433.5	433.5	433.5	433.5	433.5	433.5	433.5	433.5	433.5	433.5	433.5	433.5	433.5	433.5	433.5	410.5	1639	1660	940	905.5	1486	188.5	180.5	340	333	325	430.5	322	319.5	320	296.5	326.5	374.5	363	363.5	287	441.5	251.5	448.5	2531.5	3430	847	438	447.5	447.5	433	306.5	307.5	424.5
454.5	565	565	565	565	565	565	565	565	565	565	565	565	565	565	565	575	829	789	1108.5	1129.5	791	223.5	167	404.5	379	361.5	482	414.5	384.5	430	400	562.5	530.5	317	296.5	299	405	405.5	338	800	847	6928	370	377.5	377.5	345.5	438.5	423.5	347
293	1079	1079	1079	1079	1079	1079	1079	1079	1079	1079	1079	1079	1079	1079	1079	1061.5	426.5	378.5	342	355.5	424	248.5	206.5	327	328.5	340.5	761.5	394.5	385.5	417	382	425.5	400.5	358	315	325.5	728	299.5	1022	400	438	370	4562	592	592	920.5	403.5	396.5	2300
348	569	569	569	569	569	569	569	569	569	569	569	569	569	569	569	563	433.5	438	375.5	379.5	440	250	210	405	395.5	412.5	605	370.5	358	403	350	506.5	551	446	415	341.5	587.5	340	556.5	472.5	447.5	377.5	592	5139	5139	545.5	392	377	561.5
348	569	569	569	569	569	569	569	569	569	569	569	569	569	569	569	563	433.5	438	375.5	379.5	440	250	210	405	395.5	412.5	605	370.5	358	403	350	506.5	551	446	415	341.5	587.5	340	556.5	472.5	447.5	377.5	592	5139	5139	545.5	392	377	561.5
287.5	1036.5	1036.5	1036.5	1036.5	1036.5	1036.5	1036.5	1036.5	1036.5	1036.5	1036.5	1036.5	1036.5	1036.5	1036.5	1032.5	389.5	366.5	331	344	377.5	223	230	334.5	330	299	681.5	385.5	365.5	401.5	400.5	395	379	365.5	364.5	351.5	617	276	1164	455	433	345.5	920.5	545.5	545.5	3118	345.5	318	918
619	682.5	682.5	682.5	682.5	682.5	682.5	682.5	682.5	682.5	682.5	682.5	682.5	682.5	682.5	682.5	652.5	291	269.5	307.5	328	297	229.5	188	562	551	560.5	389	1031.5	1034	389.5	952.5	452.5	532.5	552.5	558	551.5	373	441	379	297.5	306.5	438.5	403.5	392	392	345.5	5327	3672.5	350
539	585.5	585.5	585.5	585.5	585.5	585.5	585.5	585.5	585.5	585.5	585.5	585.5	585.5	585.5	585.5	592	312	264	265.5	264	303.5	201	166	540	537.5	546.5	365	1025.5	1049.5	380.5	902	444.5	502	512	510.5	513.5	363	407	350.5	298.5	307.5	423.5	396.5	377	377	318	3672.5	4496	347.5
269.5	1221.5	1221.5	1221.5	1221.5	1221.5	1221.5	1221.5	1221.5	1221.5	1221.5	1221.5	1221.5	1221.5	1221.5	1221.5	1195	388	387.5	338.5	332.5	344.5	262	229.5	386.5	412	409	822	334	348	392.5	385	429.5	381	406	380.5	345.5	714.5	288	1166.5	415	424.5	347	2300	561.5	561.5	918	350	347.5	4462
340.5	408.5	408.5	408.5	408.5	408.5	408.5	408.5	408.5	408.5	408.5	408.5	408.5	408.5	408.5	408.5	382	284	270.5	207.5	226.5	261.5	159	170.5	604	596.5	609	273.5	633.5	669	343	624.5	469	440	546.5	531	550	302	329.5	275.5	259	242	264	321	329	329	367.5	677.5	625.5	276.5
304	382	382	382	382	382	382	382	382	382	382	382	382	382	382	382	367	288.5	281	226	226.5	267	183.5	121.5	596	605	615	290	630	651.5	331.5	623.5	447	419	536.5	517.5	519	259.5	295.5	263.5	262	249.5	267	284.5	333	333	326.5	664.5	627	286
373	419.5	419.5	419.5	419.5	419.5	419.5	419.5	419.5	419.5	419.5	419.5	419.5	419.5	419.5	419.5	406	301.5	295.5	249	260	293.5	186	149.5	610.5	590.5	638.5	393	658.5	672.5	380	639.5	475.5	505	523	499.5	502.5	341.5	352.5	269.5	279	264	329	284	344.5	344.5	368.5	646	617	300
297.5	374.5	374.5	374.5	374.5	374.5	374.5	374.5	374.5	374.5	374.5	374.5	374.5	374.5	374.5	374.5	342	312	263	296.5	299	290.5	185	161	478	479.5	487	293	613.5	639.5	298	638.5	489.5	441.5	537	529.5	535.5	222	298.5	284.5	235	239.5	341	318.5	306	306	289.5	696.5	674.5	259.5
477.5	503	503	503	503	503	503	503	503	503	503	503	503	503	503	503	475	304.5	284.5	278	305	302.5	214	173	480	487	468	375	642.5	678	343.5	754.5	494	519.5	504	493	508.5	266	353	285	251.5	247.5	432	302	314.5	314.5	281.5	883.5	787	238.5
295	357.5	357.5	357.5	357.5	357.5	357.5	357.5	357.5	357.5	357.5	357.5	357.5	357.5	357.5	357.5	359.5	310.5	275	276.5	294	290.5	202	173.5	498.5	504.5	518.5	344	617	626.5	282	631.5	512	475	520	504	520.5	227	315	281	254.5	268.5	344.5	303.5	310.5	310.5	280.5	739	691.5	251.5
307.5	359.5	359.5	359.5	359.5	359.5	359.5	359.5	359.5	359.5	359.5	359.5	359.5	359.5	359.5	359.5	366.5	308	280.5	292	291	312	205.5	186.5	487.5	495	506.5	306.5	604	627	337.5	636.5	503	450.5	506	496	512.5	228.5	302.5	291	243.5	249.5	364	312.5	332.5	332.5	293	693.5	693	252.5
344.5	380	380	380	380	380	380	380	380	380	380	380	380	380	380	380	364	255	268.5	243	227	225.5	184.5	157.5	534	538.5	549	355.5	657	651	306	650	460	406.5	533.5	566	548	273.5	334	274.5	235.5	207	321.5	319	352.5	352.5	302	633	591	280.5
367.5	412	412	412	412	412	412	412	412	412	412	412	412	412	412	412	411.5	311.5	281	325.5	384.5	305	249	181	497.5	563	510.5	344.5	561.5	554.5	299	595.5	479	513.5	545.5	509	436.5	407	349	335.5	300	310.5	355.5	334	395.5	395.5	398.5	567.5	530.5	344.5
411	458	458	458	458	458	458	458	458	458	458	458	458	458	458	458	478	352.5	302.5	322.5	312	329.5	235.5	226	530.5	551.5	525.5	436	596	612	358.5	659.5	450	531	606	512.5	450.5	483	404.5	357	302	343	394.5	355	430.5	430.5	419.5	657	610.5	360.5
431	478.5	478.5	478.5	478.5	478.5	478.5	478.5	478.5	478.5	478.5	478.5	478.5	478.5	478.5	478.5	453.5	258	243	275.5	281	240	237.5	226.5	446.5	465	457	327.5	653.5	670.5	430	656.5	581.5	553	420.5	421	420	292	321.5	231.5	242.5	226.5	458.5	265.5	323	323	279	819.5	784	296.5
321.5	408.5	408.5	408.5	408.5	408.5	408.5	408.5	408.5	408.5	408.5	408.5	408.5	408.5	408.5	408.5	369.5	289	294	274	307	281	201	218	372.5	373	376.5	375	355.5	331.5	236	410	482.5	503.5	405	391.5	389	336.5	316	344	303	316	327.5	418	361.5	361.5	349.5	330.5	316	372.5
316.5	412	412	412	412	412	412	412	412	412	412	412	412	412	412	412	364	293	300	281.5	319.5	286.5	206.5	227.5	379	376	382	406	357.5	332.5	234	410	478	506	401.5	380.5	378	363.5	318	351.5	316.5	310	317.5	436.5	357	357	339	333.5	319	400
636	596.5	596.5	596.5	596.5	596.5	596.5	596.5	596.5	596.5	596.5	596.5	596.5	596.5	596.5	596.5	577.5	318.5	302	321.5	280	310	273.5	258.5	432	470.5	480.5	579	489	526.5	396	631.5	719	683	525.5	484.5	431.5	411.5	480.5	426.5	344	344.5	542	360	547	547	353.5	634	572	434.5
485	436	436	436	436	436	436	436	436	436	436	436	436	436	436	436	401	324.5	306.5	271.5	268.5	273	193.5	148	343.5	337.5	341	338.5	423	406.5	275	438.5	462	499.5	399.5	416	447.5	352	398.5	283	256	277.5	334.5	265	314.5	314.5	288	458.5	451.5	254
320.5	386.5	386.5	386.5	386.5	386.5	386.5	386.5	386.5	386.5	386.5	386.5	386.5	386.5	386.5	386.5	345.5	291.5	267	272.5	266	267.5	151	131	375	401	426	271.5	458.5	446.5	269	410.5	445.5	455	494.5	449	460	380.5	345	354	328.5	338.5	320.5	335.5	298.5	298.5	342	491.5	468	312
345.5	375	375	375	375	375	375	375	375	375	375	375	375	375	375	375	348.5	251.5	236.5	263.5	286	236.5	128	152	399	407.5	389.5	280.5	456.5	464.5	273	410.5	424.5	484.5	510	475.5	469.5	395	343.5	393	310	310	315	327	313.5	313.5	360.5	486	476.5	320.5
262	291	291	291	291	291	291	291	291	291	291	291	291	291	291	291	302.5	278	244.5	218.5	243	276	141.5	126.5	302.5	302	329	322	405.5	393	232.5	351.5	361.5	397.5	339.5	335.5	351.5	327.5	322	283.5	270	302	273	276	318	318	271.5	366	351	254.5
262	291	291	291	291	291	291	291	291	291	291	291	291	291	291	291	302.5	278	244.5	218.5	243	276	141.5	126.5	302.5	302	329	322	405.5	393	232.5	351.5	361.5	397.5	339.5	335.5	351.5	327.5	322	283.5	270	302	273	276	318	318	271.5	366	351	254.5
300	351	351	351	351	351	351	351	351	351	351	351	351	351	351	351	333.5	261.5	221.5	256	275	216	142	145.5	348	346.5	338.5	245	427.5	382.5	272.5	405	384.5	434.5	503	479	480	306	334.5	333.5	272.5	282.5	275	282.5	294	294	311.5	454	430.5	289.5
376.5	346	346	346	346	346	346	346	346	346	346	346	346	346	346	346	325	303.5	291.5	326	335	278.5	129.5	156	354.5	376	370	254.5	394	407	273	394.5	393	414.5	410	391	386	324	353.5	315	271.5	290.5	277	287.5	293	293	295	440.5	444	281
421.5	381.5	381.5	381.5	381.5	381.5	381.5	381.5	381.5	381.5	381.5	381.5	381.5	381.5	381.5	381.5	343	306.5	308.5	265.5	264	261.5	214.5	183.5	335	336.5	330.5	345	404.5	387.5	267.5	438.5	454	454	384.5	398	424	338.5	397	290	271	275.5	321	265.5	328.5	328.5	280	443	418.5	245
360.5	350.5	350.5	350.5	350.5	350.5	350.5	350.5	350.5	350.5	350.5	350.5	350.5	350.5	350.5	350.5	330	346	334.5	279.5	304	316	160.5	141	372.5	380.5	392.5	299	434.5	413.5	292	366	413	408	374.5	390	375.5	319.5	321.5	322.5	356	348.5	283.5	261	305.5	305.5	302.5	368	360	305
333.5	415	415	415	415	415	415	415	415	415	415	415	415	415	415	415	415	283	277	267	276	296.5	168	175	412.5	411	414	250	463.5	462	282	493.5	402	419	420	424	445	297.5	347.5	311	277.5	274.5	297.5	326.5	327.5	327.5	370	468.5	448.5	313.5
385	503	503	503	503	503	503	503	503	503	503	503	503	503	503	503	474	288.5	280	280	315	295	175	175.5	401	410.5	418	349.5	498	477	376	487.5	488.5	452	448.5	390.5	401.5	322.5	384.5	337.5	288	288	423.5	355.5	293	293	367	474	498.5	339
430	541	541	541	541	541	541	541	541	541	541	541	541	541	541	541	485.5	312	304.5	296	307.5	313	183.5	150.5	447.5	440.5	449.5	452.5	539	534	361.5	565	536	529.5	387	409.5	386.5	373	390.5	307.5	301.5	272.5	431	325.5	361	361	320	523	510	334.5
564.5	663	663	663	663	663	663	663	663	663	663	663	663	663	663	663	649.5	272.5	226.5	342	325	250	274	204.5	378	399	390	392	528.5	475	424	613.5	604.5	554.5	426	450.5	448	351	423.5	275	253.5	279.5	540.5	277	323.5	323.5	312.5	671	592.5	299.5
336	346	346	346	346	346	346	346	346	346	346	346	346	346	346	346	347.5	296.5	277.5	305.5	286	304	184.5	180	392	403	426.5	376	646.5	618.5	310	590	443.5	413.5	456	475	440	329.5	332.5	338	310.5	305.5	354.5	284.5	360	360	333	655.5	639	265
304	429.5	429.5	429.5	429.5	429.5	429.5	429.5	429.5	429.5	429.5	429.5	429.5	429.5	429.5	429.5	417.5	323.5	306	281.5	282.5	302.5	218	211	513.5	521	527	407	608.5	597.5	326.5	632	501.5	518.5	531	501	487.5	387	313	336.5	319.5	341.5	319.5	424	425.5	425.5	384	588	614	375
465	422.5	422.5	422.5	422.5	422.5	422.5	422.5	422.5	422.5	422.5	422.5	422.5	422.5	422.5	422.5	500.5	299	329	278	263	276	268.5	227.5	691.5	697	728.5	438	472	436	377.5	603	510	535	476	486	448	334	406.5	324	316.5	311.5	415.5	319.5	325	325	278	451	458.5	289.5
290	289	289	289	289	289	289	289	289	289	289	289	289	289	289	289	263.5	275.5	243	230	244	303	197	186	399.5	363.5	403.5	274	381	379	245	381	360	307.5	371	287.5	305.5	255	282	282	285	272.5	278	378	310	310	259.5	396	365.5	342.5
279	313.5	313.5	313.5	313.5	313.5	313.5	313.5	313.5	313.5	313.5	313.5	313.5	313.5	313.5	313.5	306	216.5	246	206.5	238.5	269.5	192	195.5	347	342.5	362.5	256	327.5	340	247	347	329.5	331	354	302	309.5	259	269	294	250.5	214	236	349	325	325	295.5	381	367.5	323.5
222.5	297.5	297.5	297.5	297.5	297.5	297.5	297.5	297.5	297.5	297.5	297.5	297.5	297.5	297.5	297.5	297	217	211.5	247.5	234.5	275	201.5	175.5	381.5	374.5	387	281.5	332	357.5	269.5	323	315	328.5	355.5	289	283	291	250	299.5	262	292	230	313	333	333	339	357	345	345
275	278.5	278.5	278.5	278.5	278.5	278.5	278.5	278.5	278.5	278.5	278.5	278.5	278.5	278.5	278.5	275.5	252	245.5	234	245.5	288.5	183	198.5	370.5	364.5	355.5	299	366	368	228	358.5	354	318.5	372	280	300.5	263	276.5	291	307.5	267.5	283.5	352	329	329	322.5	359.5	339.5	364
295	835.5	835.5	835.5	835.5	835.5	835.5	835.5	835.5	835.5	835.5	835.5	835.5	835.5	835.5	835.5	814.5	378	381	352	386.5	392	234	250.5	341.5	319.5	304	978	336	301	321	343.5	527	501.5	334.5	318	280	951.5	282.5	708.5	373.5	428.5	363.5	772.5	576	576	693.5	302	266	744.5
244.5	1115.5	1115.5	1115.5	1115.5	1115.5	1115.5	1115.5	1115.5	1115.5	1115.5	1115.5	1115.5	1115.5	1115.5	1115.5	1131	472.5	459	381.5	382	443	157	210.5	367.5	377	399	667	333	306	350	340	384.5	371	351	333	283.5	679.5	252.5	1058	466	479	393.5	950	470	470	955	384.5	402	1002
216	279.5	279.5	279.5	279.5	279.5	279.5	279.5	279.5	279.5	279.5	279.5	279.5	279.5	279.5	279.5	303.5	193	176.5	185.5	170	208.5	184.5	179.5	242.5	246	236.5	218.5	275	267	187.5	301	250	215	289	269	251.5	225	225.5	289.5	219.5	264.5	211.5	200.5	271.5	271.5	292	282.5	266	207
203.5	286.5	286.5	286.5	286.5	286.5	286.5	286.5	286.5	286.5	286.5	286.5	286.5	286.5	286.5	286.5	304	206.5	214.5	190.5	163	217.5	184.5	179.5	232	231.5	225.5	218.5	275	264	198.5	310.5	230.5	200	281	245	232.5	235	223	276.5	230.5	274.5	231.5	207	267.5	267.5	296	283.5	274.5	215
235	368	368	368	368	368	368	368	368	368	368	368	368	368	368	368	374.5	175	192	189.5	178.5	173	177.5	223.5	258.5	264.5	295	309	313.5	308	234.5	329.5	289.5	292	311.5	293	258.5	287	237.5	267	213	235	248	201.5	301.5	301.5	305	343.5	331	221.5
260	387.5	387.5	387.5	387.5	387.5	387.5	387.5	387.5	387.5	387.5	387.5	387.5	387.5	387.5	387.5	374	191.5	184	192.5	193	194	166.5	214	282	280.5	301.5	335.5	341	349.5	231	333.5	298.5	280.5	303.5	294.5	264.5	319.5	253.5	271	216	238	240	212.5	315.5	315.5	307.5	358.5	331.5	220.5
244.5	315	315	315	315	315	315	315	315	315	315	315	315	315	315	315	324	172	205	232	200.5	204.5	166	184.5	298	319	282.5	242.5	309.5	328	213.5	247	314	319.5	337	314	286.5	282	274.5	251	212.5	232	213	226.5	278.5	278.5	258.5	308.5	304	268.5
297	326.5	326.5	326.5	326.5	326.5	326.5	326.5	326.5	326.5	326.5	326.5	326.5	326.5	326.5	326.5	296	196.5	201.5	209.5	171.5	210.5	172	174.5	285	280	280.5	212	298	308.5	201.5	269	302.5	265.5	323.5	287	277.5	278	301	217	212	245	217.5	209	268	268	263	308	305.5	238.5
279	327.5	327.5	327.5	327.5	327.5	327.5	327.5	327.5	327.5	327.5	327.5	327.5	327.5	327.5	327.5	278	192	193.5	216	202.5	222	183	191.5	322.5	297.5	290	224	339	317.5	237	267	321	278.5	330.5	297	279	244	314.5	221	220	241.5	233	211	272.5	272.5	263	330.5	336.5	256.5
316	334.5	334.5	334.5	334.5	334.5	334.5	334.5	334.5	334.5	334.5	334.5	334.5	334.5	334.5	334.5	309.5	246	206	253	261.5	265	170	175	350.5	353.5	335.5	225	356	391	267	428.5	315	313.5	410.5	354	357.5	289.5	269.5	263	269.5	282	271.5	224.5	262.5	262.5	292.5	458.5	453	208.5
279	259.5	259.5	259.5	259.5	259.5	259.5	259.5	259.5	259.5	259.5	259.5	259.5	259.5	259.5	259.5	257	228	214	263	273.5	240	173	165	364	382.5	340.5	196	346	351	248	360	303	280.5	424	366.5	373.5	240	259.5	249.5	273	272	250.5	229.5	283	283	287	397	376	253
270	969.5	969.5	969.5	969.5	969.5	969.5	969.5	969.5	969.5	969.5	969.5	969.5	969.5	969.5	969.5	982.5	380.5	365.5	334.5	359.5	406	222.5	196.5	361.5	373	365.5	753.5	344	345	355	358.5	458.5	437.5	357	334	305.5	761	263.5	969.5	423.5	411	395	845	565	565	957.5	394.5	382.5	901
480	513.5	513.5	513.5	513.5	513.5	513.5	513.5	513.5	513.5	513.5	513.5	513.5	513.5	513.5	513.5	483.5	258	252.5	262	248.5	249.5	326	253	459.5	486	486.5	481	631.5	655	810	679	544	488.5	512	486	500.5	352	334.5	299.5	224.5	252.5	353.5	334	311.5	311.5	300	719	666	324
328.5	329.5	329.5	329.5	329.5	329.5	329.5	329.5	329.5	329.5	329.5	329.5	329.5	329.5	329.5	329.5	323.5	233.5	239.5	253	245.5	240.5	161	154	484.5	491	526	233	538	507	307	577.5	387	370.5	505.5	493	495.5	277	275	287	244	226	257	310.5	319.5	319.5	293.5	623.5	587	300
363	378	378	378	378	378	378	378	378	378	378	378	378	378	378	378	388	255.5	248	252	226.5	247.5	201	185.5	493	518	534.5	255	607.5	582.5	322.5	654	449.5	475.5	524.5	505.5	505.5	286	324.5	314	253.5	259.5	242	331	347.5	347.5	308.5	638	626.5	320
356.5	455	455	455	455	455	455	455	455	455	455	455	455	455	455	455	437.5	348	304.5	276	251.5	299.5	268	201.5	569	583	552	378	609	610	291	621	472.5	528.5	600.5	577	514	411	337	321.5	309.5	311	336.5	406.5	527.5	527.5	377	581	552	338.5
393	462.5	462.5	462.5	462.5	462.5	462.5	462.5	462.5	462.5	462.5	462.5	462.5	462.5	462.5	462.5	425	304.5	314.5	332.5	270	283.5	246.5	218	529	543.5	538.5	422	592	606	290	602.5	512	548	627.5	590	531.5	492.5	374	278.5	322.5	332.5	368	365	499	499	348.5	671	641.5	363.5
333.5	435	435	435	435	435	435	435	435	435	435	435	435	435	435	435	406	334.5	296	303	310.5	326.5	256	192	590.5	568	564.5	382	589.5	590.5	284.5	572	496.5	531.5	631.5	592	587.5	394	312.5	397	299.5	337.5	306	472	451	451	379	597	573.5	463.5
306	801.5	801.5	801.5	801.5	801.5	801.5	801.5	801.5	801.5	801.5	801.5	801.5	801.5	801.5	801.5	760.5	336	343.5	407.5	373.5	425	282.5	248.5	318	356.5	328.5	873.5	291.5	293.5	332	352.5	450.5	500	334	355	289	874	269.5	646.5	353	356	395	668	550	550	618	334	299	691
229.5	810	810	810	810	810	810	810	810	810	810	810	810	810	810	810	784	359	375.5	348.5	323	350	230.5	196	353	355	368	825	293	293	337.5	385	425.5	441	335.5	324	268.5	824.5	260.5	612	365.5	384.5	364.5	726.5	557.5	557.5	686.5	287	276	655.5
548.5	861	861	861	861	861	861	861	861	861	861	861	861	861	861	861	799	407	379.5	317	304.5	391.5	230	232	419	436.5	449	614.5	467	449.5	530.5	595.5	564	630	410.5	376.5	371.5	583	406.5	548.5	393	391.5	519.5	580.5	620.5	620.5	521	752	578	494
404.5	371.5	371.5	371.5	371.5	371.5	371.5	371.5	371.5	371.5	371.5	371.5	371.5	371.5	371.5	371.5	391.5	261.5	287.5	276	228	265.5	184	223.5	710.5	722	734	347.5	485.5	494.5	375	525.5	456.5	496	484.5	451	471	306.5	351	299	261	252.5	356	315.5	313	313	299.5	548	498	294.5
583.5	555.5	555.5	555.5	555.5	555.5	555.5	555.5	555.5	555.5	555.5	555.5	555.5	555.5	555.5	555.5	539	293	324.5	236	258.5	282	257	247	678	712	699	586.5	523	480	515	615	495.5	555	474.5	492.5	469.5	396.5	418	292	333	323.5	468	319.5	366.5	366.5	340.5	728.5	564.5	272
298.5	344	344	344	344	344	344	344	344	344	344	344	344	344	344	344	346	256	228.5	237	242	254.5	185	170	480	502	485	261.5	523.5	516.5	259	560.5	352.5	358	472.5	454	435	295	336.5	319.5	272	277.5	297.5	314.5	355	355	333	562	477	321
335.5	347.5	347.5	347.5	347.5	347.5	347.5	347.5	347.5	347.5	347.5	347.5	347.5	347.5	347.5	347.5	326	243	217.5	234.5	258.5	231	149	126	444	453.5	489	288	516.5	503	270.5	500.5	392.5	382.5	441	432	419	281	300.5	295	223.5	199	285.5	332.5	295.5	295.5	295.5	466	444.5	324.5
237	338	338	338	338	338	338	338	338	338	338	338	338	338	338	338	345.5	265	213.5	256.5	263	244	221	184.5	404	412	423	285	338	307.5	255.5	404.5	358	344	381	370	317.5	289	255	283	225	220	325.5	303.5	360	360	289	411.5	394	299.5
418.5	505.5	505.5	505.5	505.5	505.5	505.5	505.5	505.5	505.5	505.5	505.5	505.5	505.5	505.5	505.5	510.5	272	231.5	252.5	265	236.5	229	203	408.5	400.5	382	383.5	340.5	366	301	501	357	432.5	384	372.5	329	323.5	314	278.5	231	234	376.5	314	341.5	341.5	295	545	456	270.5
334.5	335.5	335.5	335.5	335.5	335.5	335.5	335.5	335.5	335.5	335.5	335.5	335.5	335.5	335.5	335.5	328.5	269	241	304.5	295	250.5	208	221.5	415	397.5	400	321.5	368.5	349	256.5	428	460.5	442.5	412	396	377.5	281.5	326.5	308	272.5	260	347.5	251	325.5	325.5	294	431.5	408	293
361	865.5	865.5	865.5	865.5	865.5	865.5	865.5	865.5	865.5	865.5	865.5	865.5	865.5	865.5	865.5	875	414	362	381.5	377	491	266.5	273	310	292.5	317	947	408	401.5	410	420	521	577.5	370	306	281.5	876.5	318.5	679	379.5	381.5	508.5	728	535	535	576	416	425.5	744.5
361	865.5	865.5	865.5	865.5	865.5	865.5	865.5	865.5	865.5	865.5	865.5	865.5	865.5	865.5	865.5	875	414	362	381.5	377	491	266.5	273	310	292.5	317	947	408	401.5	410	420	521	577.5	370	306	281.5	876.5	318.5	679	379.5	381.5	508.5	728	535	535	576	416	425.5	744.5
361	865.5	865.5	865.5	865.5	865.5	865.5	865.5	865.5	865.5	865.5	865.5	865.5	865.5	865.5	865.5	875	414	362	381.5	377	491	266.5	273	310	292.5	317	947	408	401.5	410	420	521	577.5	370	306	281.5	876.5	318.5	679	379.5	381.5	508.5	728	535	535	576	416	425.5	744.5
361	865.5	865.5	865.5	865.5	865.5	865.5	865.5	865.5	865.5	865.5	865.5	865.5	865.5	865.5	865.5	875	414	362	381.5	377	491	266.5	273	310	292.5	317	947	408	401.5	410	420	521	577.5	370	306	281.5	876.5	318.5	679	379.5	381.5	508.5	728	535	535	576	416	425.5	744.5
361	865.5	865.5	865.5	865.5	865.5	865.5	865.5	865.5	865.5	865.5	865.5	865.5	865.5	865.5	865.5	875	414	362	381.5	377	491	266.5	273	310	292.5	317	947	408	401.5	410	420	521	577.5	370	306	281.5	876.5	318.5	679	379.5	381.5	508.5	728	535	535	576	416	425.5	744.5
361	865.5	865.5	865.5	865.5	865.5	865.5	865.5	865.5	865.5	865.5	865.5	865.5	865.5	865.5	865.5	875	414	362	381.5	377	491	266.5	273	310	292.5	317	947	408	401.5	410	420	521	577.5	370	306	281.5	876.5	318.5	679	379.5	381.5	508.5	728	535	535	576	416	425.5	744.5
361	865.5	865.5	865.5	865.5	865.5	865.5	865.5	865.5	865.5	865.5	865.5	865.5	865.5	865.5	865.5	875	414	362	381.5	377	491	266.5	273	310	292.5	317	947	408	401.5	410	420	521	577.5	370	306	281.5	876.5	318.5	679	379.5	381.5	508.5	728	535	535	576	416	425.5	744.5
361	865.5	865.5	865.5	865.5	865.5	865.5	865.5	865.5	865.5	865.5	865.5	865.5	865.5	865.5	865.5	875	414	362	381.5	377	491	266.5	273	310	292.5	317	947	408	401.5	410	420	521	577.5	370	306	281.5	876.5	318.5	679	379.5	381.5	508.5	728	535	535	576	416	425.5	744.5
361	865.5	865.5	865.5	865.5	865.5	865.5	865.5	865.5	865.5	865.5	865.5	865.5	865.5	865.5	865.5	875	414	362	381.5	377	491	266.5	273	310	292.5	317	947	408	401.5	410	420	521	577.5	370	306	281.5	876.5	318.5	679	379.5	381.5	508.5	728	535	535	576	416	425.5	744.5
361	865.5	865.5	865.5	865.5	865.5	865.5	865.5	865.5	865.5	865.5	865.5	865.5	865.5	865.5	865.5	875	414	362	381.5	377	491	266.5	273	310	292.5	317	947	408	401.5	410	420	521	577.5	370	306	281.5	876.5	318.5	679	379.5	381.5	508.5	728	535	535	576	416	425.5	744.5
361	865.5	865.5	865.5	865.5	865.5	865.5	865.5	865.5	865.5	865.5	865.5	865.5	865.5	865.5	865.5	875	414	362	381.5	377	491	266.5	273	310	292.5	317	947	408	401.5	410	420	521	577.5	370	306	281.5	876.5	318.5	679	379.5	381.5	508.5	728	535	535	576	416	425.5	744.5
361	865.5	865.5	865.5	865.5	865.5	865.5	865.5	865.5	865.5	865.5	865.5	865.5	865.5	865.5	865.5	875	414	362	381.5	377	491	266.5	273	310	292.5	317	947	408	401.5	410	420	521	577.5	370	306	281.5	876.5	318.5	679	379.5	381.5	508.5	728	535	535	576	416	425.5	744.5
259	343	343	343	343	343	343	343	343	343	343	343	343	343	343	343	341	272.5	281.5	286	281.5	262.5	264.5	221.5	354	427	394	340	294	280.5	253.5	334.5	348	341	373	331.5	328	330.5	261	317.5	287	266.5	286.5	302.5	458	458	314.5	319	314	319
328	779.5	779.5	779.5	779.5	779.5	779.5	779.5	779.5	779.5	779.5	779.5	779.5	779.5	779.5	779.5	820.5	449	445.5	342.5	368.5	477.5	279	236	323.5	342.5	339.5	926	409.5	362	405.5	417.5	460.5	531.5	334	337	298.5	1041.5	251	785	424	408	422.5	784	640.5	640.5	725	352	389.5	764
336.5	855.5	855.5	855.5	855.5	855.5	855.5	855.5	855.5	855.5	855.5	855.5	855.5	855.5	855.5	855.5	868.5	467	423	345.5	348.5	425.5	238	212	308	316.5	313	1024	385	361.5	398	404	520.5	530	306.5	335.5	303	961	264.5	814.5	445	419	458	853	674	674	763	336	338	862.5
294	806	806	806	806	806	806	806	806	806	806	806	806	806	806	806	823	427	433	360.5	322	400.5	211	179	293	315.5	308.5	928	374	355	382	402	544	520.5	344.5	334.5	326.5	928	246	780	386	405	469	864	669	669	732.5	361.5	335.5	817
305.5	815	815	815	815	815	815	815	815	815	815	815	815	815	815	815	814.5	428.5	425.5	325.5	338.5	406.5	255.5	227.5	331	334.5	347.5	911.5	405	386	401.5	379.5	494	486.5	331.5	313.5	313	944.5	245.5	776.5	436.5	414	446.5	819.5	659.5	659.5	723.5	368.5	346	825
308	814	814	814	814	814	814	814	814	814	814	814	814	814	814	814	828.5	425.5	424	359	336.5	380	229.5	189	327	317.5	349	939.5	396.5	355.5	400.5	387	505.5	507.5	325.5	311	295.5	952	249.5	803	408	416.5	442	810.5	632.5	632.5	717	324.5	308.5	875.5
314	776	776	776	776	776	776	776	776	776	776	776	776	776	776	776	808	418.5	406	337	318.5	383.5	226.5	205.5	337.5	349	348	890.5	371.5	378	399	376	576.5	615.5	314	311	312	906	275.5	770	382	416	451	818.5	613	613	727	324.5	303.5	830
285.5	808	808	808	808	808	808	808	808	808	808	808	808	808	808	808	799.5	395.5	438	375	325	382.5	228.5	227	324	330.5	324	893.5	370	375	370	373.5	507.5	518.5	317	324.5	323.5	946	232.5	805.5	407.5	376.5	471.5	814	662.5	662.5	725.5	340	329	847.5
331	788	788	788	788	788	788	788	788	788	788	788	788	788	788	788	812.5	362	391	390	342.5	385.5	208.5	258	360.5	359	373	822.5	345.5	339.5	375	361.5	552.5	557.5	339.5	306.5	299.5	949	226	743	423	393	438	856.5	645	645	705.5	387.5	316.5	830.5
301.5	871.5	871.5	871.5	871.5	871.5	871.5	871.5	871.5	871.5	871.5	871.5	871.5	871.5	871.5	871.5	857.5	465.5	486	400	348.5	494	233.5	200	343	347	359.5	920.5	372	359	370.5	388	516.5	526	359	347.5	327	957.5	243	775	452	452	518	873	664.5	664.5	719.5	347	327.5	879.5
313.5	825	825	825	825	825	825	825	825	825	825	825	825	825	825	825	842	453.5	450	382.5	352	461.5	251	221	298.5	322	324.5	866	388.5	359	370	368.5	526.5	506.5	317	314	302	928.5	234	775.5	463	431.5	453	862.5	648	648	737	344	323	808.5
329.5	799.5	799.5	799.5	799.5	799.5	799.5	799.5	799.5	799.5	799.5	799.5	799.5	799.5	799.5	799.5	815	432.5	443	351	325.5	448	251.5	251.5	339	334.5	323.5	842.5	343.5	335.5	348	376.5	510.5	541	318.5	318	300.5	978.5	254.5	766.5	410.5	428	464.5	788	662	662	726.5	300.5	294.5	821.5
317.5	802.5	802.5	802.5	802.5	802.5	802.5	802.5	802.5	802.5	802.5	802.5	802.5	802.5	802.5	802.5	818.5	497.5	457.5	364.5	336	468	274	276	351	380	361.5	900	378	348	371.5	418	491	563.5	301	318.5	294.5	988.5	255	764.5	428.5	425	514.5	803	678	678	704.5	398	377.5	811.5
366.5	652.5	652.5	652.5	652.5	652.5	652.5	652.5	652.5	652.5	652.5	652.5	652.5	652.5	652.5	652.5	676	396.5	368.5	312	291	419	273.5	254.5	274.5	297.5	287.5	835	305	318	297.5	289.5	447.5	488.5	342	330	266.5	841.5	259.5	623	353	348	318	616	582	582	573	342.5	332	715
397.5	946	946	946	946	946	946	946	946	946	946	946	946	946	946	946	936.5	454	403	384.5	408.5	493	260.5	289.5	315	301.5	328.5	1012.5	363	345	401.5	442	538	676.5	346	265.5	263	943.5	301	704.5	403	417.5	570.5	704.5	523.5	523.5	606.5	532	471.5	714.5
402.5	874	874	874	874	874	874	874	874	874	874	874	874	874	874	874	917	406.5	379.5	387	393	455	270.5	261.5	269	290	270	909.5	363.5	390.5	365	464	579.5	707.5	318.5	250	236	831.5	324	595.5	426.5	406.5	555.5	664.5	534.5	534.5	552	508	456.5	603
411	930	930	930	930	930	930	930	930	930	930	930	930	930	930	930	1006	429	404.5	405	402.5	465	295	227.5	358	354.5	365	959.5	423.5	424.5	474.5	473.5	537.5	603	349	338	279	875.5	358.5	683	418	419.5	546.5	760.5	580	580	579.5	477	511	757
342	318.5	318.5	318.5	318.5	318.5	318.5	318.5	318.5	318.5	318.5	318.5	318.5	318.5	318.5	318.5	305.5	312.5	286.5	316	300	307.5	179	186.5	331.5	336.5	354.5	283	400.5	377	284	418	442.5	465.5	381	377	366	299.5	334.5	326.5	347.5	359	288.5	275	321	321	373	427	383.5	316
314.5	330	330	330	330	330	330	330	330	330	330	330	330	330	330	330	298.5	298.5	265.5	295.5	265.5	284.5	160.5	153	320.5	328	349	271.5	386.5	375	275.5	401	428.5	452	372.5	358	364	310	317	320.5	333	327	294	265.5	319.5	319.5	369	419.5	386.5	312
339.5	403.5	403.5	403.5	403.5	403.5	403.5	403.5	403.5	403.5	403.5	403.5	403.5	403.5	403.5	403.5	423	206	203.5	263.5	278.5	237	201	173.5	333	341	352	313.5	437.5	437	353.5	433.5	534.5	510	333	331	346	296.5	324	319	218.5	223.5	404.5	271.5	309	309	318.5	452	434	297.5
356.5	432	432	432	432	432	432	432	432	432	432	432	432	432	432	432	429.5	212.5	215.5	262.5	258.5	230	189.5	171	316.5	329.5	318.5	356.5	438.5	450.5	356	477	528	553	330	310.5	329	321.5	288	339.5	236.5	241.5	385.5	274	321	321	324	503	493	281
609.5	588	588	588	588	588	588	588	588	588	588	588	588	588	588	588	544.5	312	313	262.5	244.5	300	188.5	179.5	418	421.5	399.5	442	469	501.5	349	607.5	487	674.5	375	364	377.5	391.5	438.5	331.5	331	340	449.5	281	349.5	349.5	357	751.5	576	301.5
483.5	479	479	479	479	479	479	479	479	479	479	479	479	479	479	479	467	290.5	269	304.5	306.5	309	202	172.5	352	350	374	402.5	495.5	468	374	566.5	458	564.5	368.5	374.5	387	342	392.5	298.5	309.5	307.5	381	296	284	284	344	608.5	548	280
390	405	405	405	405	405	405	405	405	405	405	405	405	405	405	405	381	381	355	314.5	324.5	370	282	204	371.5	397	396	509	409	377.5	312.5	327.5	512	527.5	394.5	316.5	296.5	435	329	371	350.5	341	466	378	492.5	492.5	334	381	363	364.5
470.5	1022.5	1022.5	1022.5	1022.5	1022.5	1022.5	1022.5	1022.5	1022.5	1022.5	1022.5	1022.5	1022.5	1022.5	1022.5	976.5	440	320	299.5	314.5	430.5	240.5	224.5	356.5	366	358.5	865	456	419	519.5	524.5	591.5	624	418.5	384	330	920.5	400.5	758.5	402	396.5	546.5	796.5	599	599	702.5	521.5	511	709.5
257	1059	1059	1059	1059	1059	1059	1059	1059	1059	1059	1059	1059	1059	1059	1059	1049	360.5	338	324	301.5	339.5	186.5	192	335.5	333	350.5	872	349	348	346	377.5	524	468	411	377.5	350.5	838.5	248	860.5	360.5	366	382	1018	585	585	925	396.5	384	954
282	1001	1001	1001	1001	1001	1001	1001	1001	1001	1001	1001	1001	1001	1001	1001	975	340	371.5	325.5	298	368	235	241.5	338	364.5	346	915	362.5	361.5	376.5	328.5	549.5	551	421	400.5	357.5	876.5	240.5	877.5	417.5	402.5	332	972	606.5	606.5	836.5	366.5	358.5	958
295	890.5	890.5	890.5	890.5	890.5	890.5	890.5	890.5	890.5	890.5	890.5	890.5	890.5	890.5	890.5	896	432.5	431	383	329.5	428	271	253	369	368.5	367.5	912	376	381	379.5	430.5	546.5	512	420	395.5	360	1013	269	721.5	464.5	473.5	464	828.5	605.5	605.5	756	371	356.5	774.5
306	894.5	894.5	894.5	894.5	894.5	894.5	894.5	894.5	894.5	894.5	894.5	894.5	894.5	894.5	894.5	920	448.5	417	385.5	335.5	404	262	254	377	378.5	367	932	359.5	357.5	367	392	534	567.5	439	390.5	331	1035	285	729.5	435.5	430	416	811.5	600	600	745	354	345.5	793
298.5	884	884	884	884	884	884	884	884	884	884	884	884	884	884	884	893.5	416.5	395.5	384	385	407.5	285	244	340	371	353	947	349	352	370.5	399.5	570	607	433	366	338.5	1044	305	711	421.5	458.5	389.5	781	624.5	624.5	770	331.5	327	768
298.5	884	884	884	884	884	884	884	884	884	884	884	884	884	884	884	893.5	416.5	395.5	384	385	407.5	285	244	340	371	353	947	349	352	370.5	399.5	570	607	433	366	338.5	1044	305	711	421.5	458.5	389.5	781	624.5	624.5	770	331.5	327	768
283.5	837	837	837	837	837	837	837	837	837	837	837	837	837	837	837	871	430	404.5	370.5	361	436.5	264.5	286	351.5	357	320.5	932.5	340	331.5	374.5	380	501	531	396	365.5	319	980.5	293	787.5	405	406.5	385.5	786	648	648	797	337.5	330.5	760.5
255.5	1285.5	1285.5	1285.5	1285.5	1285.5	1285.5	1285.5	1285.5	1285.5	1285.5	1285.5	1285.5	1285.5	1285.5	1285.5	1297	399.5	400	324	320.5	415.5	227	220	307	308.5	321.5	690.5	397.5	384	345	362	363	370	303.5	310	298.5	693	262	1864	439.5	390.5	342	1008.5	599	599	1245.5	394.5	395.5	1110.5
350.5	809	809	809	809	809	809	809	809	809	809	809	809	809	809	809	803.5	373.5	359.5	334	308.5	350.5	215	207	399.5	412	377	964	368.5	357.5	403.5	369.5	625.5	524.5	354.5	342	313	916	335.5	686.5	372.5	392.5	389.5	784	536	536	660	345	367.5	735.5
275.5	815	815	815	815	815	815	815	815	815	815	815	815	815	815	815	809	385.5	380.5	324	333	348	237	204	338.5	307.5	299.5	876.5	323.5	304	315	300	562.5	487	317	267.5	255	810	266.5	688.5	418	432.5	413.5	744	536.5	536.5	661	268	280.5	758
275.5	815	815	815	815	815	815	815	815	815	815	815	815	815	815	815	809	385.5	380.5	324	333	348	237	204	338.5	307.5	299.5	876.5	323.5	304	315	300	562.5	487	317	267.5	255	810	266.5	688.5	418	432.5	413.5	744	536.5	536.5	661	268	280.5	758
275.5	815	815	815	815	815	815	815	815	815	815	815	815	815	815	815	809	385.5	380.5	324	333	348	237	204	338.5	307.5	299.5	876.5	323.5	304	315	300	562.5	487	317	267.5	255	810	266.5	688.5	418	432.5	413.5	744	536.5	536.5	661	268	280.5	758
275.5	815	815	815	815	815	815	815	815	815	815	815	815	815	815	815	809	385.5	380.5	324	333	348	237	204	338.5	307.5	299.5	876.5	323.5	304	315	300	562.5	487	317	267.5	255	810	266.5	688.5	418	432.5	413.5	744	536.5	536.5	661	268	280.5	758
275.5	815	815	815	815	815	815	815	815	815	815	815	815	815	815	815	809	385.5	380.5	324	333	348	237	204	338.5	307.5	299.5	876.5	323.5	304	315	300	562.5	487	317	267.5	255	810	266.5	688.5	418	432.5	413.5	744	536.5	536.5	661	268	280.5	758
275.5	815	815	815	815	815	815	815	815	815	815	815	815	815	815	815	809	385.5	380.5	324	333	348	237	204	338.5	307.5	299.5	876.5	323.5	304	315	300	562.5	487	317	267.5	255	810	266.5	688.5	418	432.5	413.5	744	536.5	536.5	661	268	280.5	758
275.5	815	815	815	815	815	815	815	815	815	815	815	815	815	815	815	809	385.5	380.5	324	333	348	237	204	338.5	307.5	299.5	876.5	323.5	304	315	300	562.5	487	317	267.5	255	810	266.5	688.5	418	432.5	413.5	744	536.5	536.5	661	268	280.5	758
332	765.5	765.5	765.5	765.5	765.5	765.5	765.5	765.5	765.5	765.5	765.5	765.5	765.5	765.5	765.5	773.5	364	357.5	351	344	341.5	250.5	275.5	337	346.5	326	973	371	375	402.5	355.5	562.5	573.5	344.5	297.5	268.5	914.5	306.5	691.5	388	352	413	755	592	592	648.5	321.5	327	740
284.5	1331.5	1331.5	1331.5	1331.5	1331.5	1331.5	1331.5	1331.5	1331.5	1331.5	1331.5	1331.5	1331.5	1331.5	1331.5	1311	425	395	303	316	447	230	236	387	400.5	383.5	688.5	356	352.5	401	382	381.5	358	342	335.5	334.5	808	279.5	1565	465.5	427.5	334.5	1030.5	564	564	1299	359	344	1173
265.5	1278	1278	1278	1278	1278	1278	1278	1278	1278	1278	1278	1278	1278	1278	1278	1323.5	421	383	329	324	431	226.5	215	317	327.5	317.5	778	382.5	376.5	398.5	370	405	358.5	307.5	297.5	290.5	703.5	295.5	1899.5	446	427.5	363	1010	572	572	1268	374.5	373.5	1145
975	621.5	621.5	621.5	621.5	621.5	621.5	621.5	621.5	621.5	621.5	621.5	621.5	621.5	621.5	621.5	593.5	278	269.5	282	270.5	285.5	254.5	241	319.5	313	296	503	436.5	465.5	504	490.5	458	486.5	301.5	351.5	327.5	401	760.5	266.5	311.5	310.5	448	297.5	331.5	331.5	285.5	652	538.5	303.5
404	524	524	524	524	524	524	524	524	524	524	524	524	524	524	524	559	330.5	332.5	377.5	378	302	255	247	431	436.5	436	548.5	422.5	420.5	425	436	583	608	376.5	411	336	459.5	311	334.5	335.5	360.5	527.5	404	514.5	514.5	328	464	436.5	374
296.5	329.5	329.5	329.5	329.5	329.5	329.5	329.5	329.5	329.5	329.5	329.5	329.5	329.5	329.5	329.5	332	295	301	337.5	362	272	238	208	727.5	745.5	770.5	310	424	434.5	285.5	452.5	446.5	405	455	411.5	403	379	297.5	328.5	307	291.5	331.5	326.5	423	423	278.5	438.5	427	343
352.5	342.5	342.5	342.5	342.5	342.5	342.5	342.5	342.5	342.5	342.5	342.5	342.5	342.5	342.5	342.5	332.5	270	260	330.5	300.5	285.5	207	170.5	769	749	757	318.5	390	396.5	297.5	452.5	427.5	410	448	417	369.5	348	290.5	315.5	319.5	281.5	286.5	301.5	357	357	292.5	422	424	316.5
281.5	317.5	317.5	317.5	317.5	317.5	317.5	317.5	317.5	317.5	317.5	317.5	317.5	317.5	317.5	317.5	323	341	326.5	294	320	310	249.5	182.5	662	690.5	679.5	353	380.5	370.5	255	410.5	416.5	435	404	369.5	355.5	306	289	318.5	353.5	304.5	320	258	382.5	382.5	285	374	351	260.5
439	319	319	319	319	319	319	319	319	319	319	319	319	319	319	319	315.5	270	218.5	297.5	334.5	234.5	242	259.5	389	398	361.5	472	366	349.5	260.5	394	441	468	416.5	434	406.5	331.5	418	296.5	210.5	246.5	364.5	292.5	366	366	296.5	470.5	422	264.5
369	297.5	297.5	297.5	297.5	297.5	297.5	297.5	297.5	297.5	297.5	297.5	297.5	297.5	297.5	297.5	306.5	262	255	287.5	334.5	250	195	185.5	379.5	380.5	371.5	329.5	359.5	359.5	249.5	384	433.5	456	420.5	433	386.5	330.5	354.5	294.5	238	238.5	345	307.5	350.5	350.5	296.5	467.5	427.5	294.5
235.5	1291	1291	1291	1291	1291	1291	1291	1291	1291	1291	1291	1291	1291	1291	1291	1269	388.5	359	312.5	299.5	414.5	239.5	239.5	305	319	296.5	699	379	341	372.5	371.5	413.5	391	344	319	306.5	752.5	266.5	2212.5	429	441.5	330.5	1037.5	587	587	1213.5	358.5	365	1201
545	496	496	496	496	496	496	496	496	496	496	496	496	496	496	496	502	331.5	266	274.5	241.5	273	286.5	212	356	351	363.5	426.5	374.5	410.5	359.5	556	482	471.5	351.5	361.5	342	325.5	409.5	326.5	263	255.5	572	298	354.5	354.5	285	511.5	466.5	324.5
544	521	521	521	521	521	521	521	521	521	521	521	521	521	521	521	510	336.5	277	294.5	230	320.5	298	195	368.5	354.5	361.5	454.5	405	389	327	550.5	440.5	462.5	373	350	344	359	405	329.5	249.5	251	515.5	293	337	337	264.5	519.5	475	348.5
491.5	491.5	491.5	491.5	491.5	491.5	491.5	491.5	491.5	491.5	491.5	491.5	491.5	491.5	491.5	491.5	516.5	348.5	264	316	254	315	244.5	219.5	386	368.5	377.5	437	379	353.5	327	538	478	458	320	335.5	327	334.5	326.5	279.5	256	257.5	473.5	275	301.5	301.5	283	504.5	481	318.5
456	455.5	455.5	455.5	455.5	455.5	455.5	455.5	455.5	455.5	455.5	455.5	455.5	455.5	455.5	455.5	452.5	297.5	250	242	250	278.5	217	218	336.5	330	327.5	353.5	397	415	314.5	501.5	402	422	325.5	321	369.5	296	367	310	259.5	243	407	278	288.5	288.5	321.5	515.5	477.5	271.5
583.5	594	594	594	594	594	594	594	594	594	594	594	594	594	594	594	573.5	353	310.5	281	300	315.5	189.5	196.5	405.5	414.5	435	467	496.5	471.5	469.5	602.5	601.5	669.5	400.5	410.5	387.5	375.5	421.5	326	322	301	489	332	437.5	437.5	384.5	675.5	555.5	325.5
507.5	647	647	647	647	647	647	647	647	647	647	647	647	647	647	647	624	282.5	258.5	247.5	257.5	284	240	257.5	542.5	553	547	361.5	808	810.5	417	837	547	579	517	506.5	492	355	457.5	333	307.5	296.5	370.5	320	399.5	399.5	357	927.5	828	334
477	624	624	624	624	624	624	624	624	624	624	624	624	624	624	624	587	268.5	267.5	239.5	246.5	319	195	185	421.5	429.5	442	421.5	560	529	366.5	584	469	516	357.5	375.5	382	368	432	353.5	298	296	415	405.5	296	296	413.5	613.5	554	347.5
385	944.5	944.5	944.5	944.5	944.5	944.5	944.5	944.5	944.5	944.5	944.5	944.5	944.5	944.5	944.5	889	395.5	376	340	334.5	389.5	239.5	235	369.5	374.5	362	1290.5	321.5	318.5	401.5	361.5	590	587.5	315	328	295	1149.5	300.5	760	409	460.5	437	888	666.5	666.5	718.5	354.5	342	818.5
460.5	429.5	429.5	429.5	429.5	429.5	429.5	429.5	429.5	429.5	429.5	429.5	429.5	429.5	429.5	429.5	436	287.5	242	307.5	287.5	290	211	250.5	414.5	421	385	414.5	480.5	464	465	492	576	519	381.5	390	426.5	340.5	433	332	289.5	277.5	418.5	328.5	329.5	329.5	315	455.5	453.5	294.5
492.5	481	481	481	481	481	481	481	481	481	481	481	481	481	481	481	475.5	321.5	301	283.5	264.5	315	203	257.5	426	409.5	414	406	512	485	449	505.5	513.5	501.5	367.5	395	405	322.5	415	291.5	309	291.5	432.5	329	355	355	279.5	482	472.5	316.5
397	389.5	389.5	389.5	389.5	389.5	389.5	389.5	389.5	389.5	389.5	389.5	389.5	389.5	389.5	389.5	395	283	266	262	255	245	233	228.5	324	334	333.5	334	411	423.5	395	538.5	457	509.5	329.5	338.5	353	242.5	367.5	314	278	296	401.5	250	316	316	312.5	440	386	289.5
319	876.5	876.5	876.5	876.5	876.5	876.5	876.5	876.5	876.5	876.5	876.5	876.5	876.5	876.5	876.5	874	368.5	388.5	335	323.5	419.5	217	260	333.5	384	334.5	1350	330	321	403.5	342	550	581.5	351	324.5	297	1086.5	265	749.5	400.5	441.5	404.5	816	656.5	656.5	716	354	324.5	797
369	848.5	848.5	848.5	848.5	848.5	848.5	848.5	848.5	848.5	848.5	848.5	848.5	848.5	848.5	848.5	804.5	354	343	311.5	319.5	438	259.5	245	340.5	352	332.5	1260.5	287	287.5	379.5	302	552.5	623.5	346	312	313	1064.5	248	738	399	462	426	798	660.5	660.5	703	338	285.5	742
345.5	498	498	498	498	498	498	498	498	498	498	498	498	498	498	498	481.5	290.5	273.5	417	443.5	320	186.5	228.5	341	299	280.5	430.5	285.5	291.5	433	419	397	504	375	336	281.5	495.5	350.5	402.5	260.5	272.5	391	351	504	504	361	391.5	346.5	344.5
255.5	405.5	405.5	405.5	405.5	405.5	405.5	405.5	405.5	405.5	405.5	405.5	405.5	405.5	405.5	405.5	364	298.5	237	270	290	293.5	178	200	316	304	306.5	353.5	303.5	342.5	337	342	311.5	299.5	273.5	317	261	399	230	354	321	277	307	283	356	356	299	354	356.5	295
242.5	437.5	437.5	437.5	437.5	437.5	437.5	437.5	437.5	437.5	437.5	437.5	437.5	437.5	437.5	437.5	407	363.5	373.5	443	409.5	345.5	200	191.5	360	365.5	363	400.5	359	351	330.5	335	449	461	395	332	315	383.5	245.5	459	399	355.5	422.5	432.5	558	558	385.5	294	315.5	401
263	1132.5	1132.5	1132.5	1132.5	1132.5	1132.5	1132.5	1132.5	1132.5	1132.5	1132.5	1132.5	1132.5	1132.5	1132.5	1135	403.5	374	330	322.5	387.5	169.5	177.5	337	355	373.5	748.5	363.5	343	380	365.5	415	386.5	390	334.5	328	745.5	245	1132	440	432.5	358.5	2002	504	504	905	368.5	369.5	2269
256	673	673	673	673	673	673	673	673	673	673	673	673	673	673	673	657.5	365.5	380.5	330.5	329.5	353	273	253	377.5	378.5	397	733	376	351.5	409	330.5	629	537	370.5	354.5	308	715	284	622	427.5	424	393.5	727.5	522.5	522.5	594.5	355.5	344.5	674
255	670.5	670.5	670.5	670.5	670.5	670.5	670.5	670.5	670.5	670.5	670.5	670.5	670.5	670.5	670.5	663.5	357.5	380.5	328.5	325.5	347	273	251	378.5	396	406	741	376.5	349.5	411	340.5	640	550.5	383.5	361.5	305.5	717	279	623	429.5	425	389.5	718.5	513.5	513.5	590.5	356.5	353.5	681
265.5	707.5	707.5	707.5	707.5	707.5	707.5	707.5	707.5	707.5	707.5	707.5	707.5	707.5	707.5	707.5	681.5	397.5	357.5	360	372	420	228.5	244.5	373	375.5	404	765	339	333	410.5	376.5	588	510	411	379.5	346	684.5	271.5	617	438.5	408	406.5	643.5	578.5	578.5	565.5	349.5	339	693.5
335.5	663.5	663.5	663.5	663.5	663.5	663.5	663.5	663.5	663.5	663.5	663.5	663.5	663.5	663.5	663.5	678.5	358.5	345	359.5	363	413	290.5	251.5	399.5	432	411.5	758	377.5	377.5	397.5	352	525.5	572.5	392.5	367.5	329.5	773	281	629.5	399	409	382	632	563.5	563.5	588.5	372.5	351.5	646
305	349	349	349	349	349	349	349	349	349	349	349	349	349	349	349	349.5	306.5	243	309.5	290.5	296	158.5	176.5	341	346	373	277	407	382	276.5	412.5	383	379	366	356.5	350	303.5	327	283.5	282.5	283.5	340	278	336.5	336.5	314	406	403	291
326.5	322	322	322	322	322	322	322	322	322	322	322	322	322	322	322	317	298.5	257	305.5	315	299	138	158	328.5	348	378	269	421.5	396	259.5	462.5	398.5	370.5	374	359	355	280.5	341	264	300.5	286.5	294.5	264	297.5	297.5	302	439	407	278.5
336.5	370	370	370	370	370	370	370	370	370	370	370	370	370	370	370	355.5	307	261.5	323	306.5	316.5	163	167.5	346	355.5	379	289	399	393.5	267.5	437.5	425.5	400	363	354.5	354	303	316	298.5	306	275	351.5	292	328.5	328.5	335.5	404	389.5	288
279.5	803	803	803	803	803	803	803	803	803	803	803	803	803	803	803	813.5	334	351	354.5	332.5	299	285	193	286	292.5	270	851	321.5	306	369.5	290.5	480.5	415	309	304.5	270	854.5	308	678.5	388.5	355	366	797	561.5	561.5	696.5	257	260.5	724.5
279.5	803	803	803	803	803	803	803	803	803	803	803	803	803	803	803	813.5	334	351	354.5	332.5	299	285	193	286	292.5	270	851	321.5	306	369.5	290.5	480.5	415	309	304.5	270	854.5	308	678.5	388.5	355	366	797	561.5	561.5	696.5	257	260.5	724.5
279.5	803	803	803	803	803	803	803	803	803	803	803	803	803	803	803	813.5	334	351	354.5	332.5	299	285	193	286	292.5	270	851	321.5	306	369.5	290.5	480.5	415	309	304.5	270	854.5	308	678.5	388.5	355	366	797	561.5	561.5	696.5	257	260.5	724.5
279.5	803	803	803	803	803	803	803	803	803	803	803	803	803	803	803	813.5	334	351	354.5	332.5	299	285	193	286	292.5	270	851	321.5	306	369.5	290.5	480.5	415	309	304.5	270	854.5	308	678.5	388.5	355	366	797	561.5	561.5	696.5	257	260.5	724.5
279.5	803	803	803	803	803	803	803	803	803	803	803	803	803	803	803	813.5	334	351	354.5	332.5	299	285	193	286	292.5	270	851	321.5	306	369.5	290.5	480.5	415	309	304.5	270	854.5	308	678.5	388.5	355	366	797	561.5	561.5	696.5	257	260.5	724.5
279.5	803	803	803	803	803	803	803	803	803	803	803	803	803	803	803	813.5	334	351	354.5	332.5	299	285	193	286	292.5	270	851	321.5	306	369.5	290.5	480.5	415	309	304.5	270	854.5	308	678.5	388.5	355	366	797	561.5	561.5	696.5	257	260.5	724.5
279.5	803	803	803	803	803	803	803	803	803	803	803	803	803	803	803	813.5	334	351	354.5	332.5	299	285	193	286	292.5	270	851	321.5	306	369.5	290.5	480.5	415	309	304.5	270	854.5	308	678.5	388.5	355	366	797	561.5	561.5	696.5	257	260.5	724.5
279.5	803	803	803	803	803	803	803	803	803	803	803	803	803	803	803	813.5	334	351	354.5	332.5	299	285	193	286	292.5	270	851	321.5	306	369.5	290.5	480.5	415	309	304.5	270	854.5	308	678.5	388.5	355	366	797	561.5	561.5	696.5	257	260.5	724.5
460	435.5	435.5	435.5	435.5	435.5	435.5	435.5	435.5	435.5	435.5	435.5	435.5	435.5	435.5	435.5	397.5	285	311	275	292	329	298.5	263.5	705	724	717.5	511	477.5	450.5	319.5	445	529	527	530.5	509	429.5	561.5	264	375	308.5	332	326.5	440.5	495	495	343.5	449.5	433.5	446
393.5	411.5	411.5	411.5	411.5	411.5	411.5	411.5	411.5	411.5	411.5	411.5	411.5	411.5	411.5	411.5	376	269	312	257	268.5	280	302.5	240.5	686	723.5	708	546.5	468.5	452.5	329.5	450.5	544	594	508.5	499.5	454	574	235.5	325	298	295	297.5	358	475.5	475.5	313	438.5	429	422
271	1277.5	1277.5	1277.5	1277.5	1277.5	1277.5	1277.5	1277.5	1277.5	1277.5	1277.5	1277.5	1277.5	1277.5	1277.5	1284.5	426	379.5	326.5	330	452	243.5	250	299.5	309	294.5	737	372	363	394	356.5	417.5	412	363	307.5	295.5	757.5	288.5	2150	513.5	485.5	351	1076	611	611	1206	348	332.5	1198
336.5	564.5	564.5	564.5	564.5	564.5	564.5	564.5	564.5	564.5	564.5	564.5	564.5	564.5	564.5	564.5	554.5	431	430	382	417	429.5	288.5	223.5	403.5	448.5	458	498	413.5	397	304	440.5	436	486.5	451.5	385.5	368	661	320.5	506.5	382.5	405.5	462.5	527	599.5	599.5	489.5	466.5	430.5	512.5
271.5	537	537	537	537	537	537	537	537	537	537	537	537	537	537	537	517	428.5	439.5	402	413.5	411	228.5	183	375	415	429	487	371	360	281	365.5	459	429	432	384	331.5	592	249.5	491.5	422.5	419	413.5	501.5	526.5	526.5	480	403	380.5	495.5
395.5	390	390	390	390	390	390	390	390	390	390	390	390	390	390	390	392	291.5	258	256.5	236.5	280	204	165	442.5	438.5	443	321.5	652.5	630.5	298.5	555.5	418.5	425	464	454.5	432	364	357	336.5	245	258	307	281	327.5	327.5	330	671	685.5	315
516	531.5	531.5	531.5	531.5	531.5	531.5	531.5	531.5	531.5	531.5	531.5	531.5	531.5	531.5	531.5	549	305.5	282	257.5	260.5	278.5	230	204.5	451	459	452.5	454.5	442.5	418.5	417.5	591.5	619.5	663	462	443	454	416.5	490	314.5	306.5	305.5	459	383	440.5	440.5	337.5	559	516.5	343.5
331	493.5	493.5	493.5	493.5	493.5	493.5	493.5	493.5	493.5	493.5	493.5	493.5	493.5	493.5	493.5	483.5	396.5	336	358.5	384.5	398.5	286.5	233.5	409.5	412.5	426.5	678.5	445.5	406	429.5	425.5	685	610.5	395	409	345	452	243.5	491	383.5	368	454.5	464.5	530.5	530.5	440	432	412.5	460.5
331	493.5	493.5	493.5	493.5	493.5	493.5	493.5	493.5	493.5	493.5	493.5	493.5	493.5	493.5	493.5	483.5	396.5	336	358.5	384.5	398.5	286.5	233.5	409.5	412.5	426.5	678.5	445.5	406	429.5	425.5	685	610.5	395	409	345	452	243.5	491	383.5	368	454.5	464.5	530.5	530.5	440	432	412.5	460.5
272	778	778	778	778	778	778	778	778	778	778	778	778	778	778	778	754	365	384.5	382	365	433	291	323	308	295	298	2944	296.5	300	372.5	309.5	410	592.5	389.5	313.5	279.5	1004.5	269.5	707	400	410.5	426.5	682.5	565	565	699.5	305.5	292.5	737.5
249	1251.5	1251.5	1251.5	1251.5	1251.5	1251.5	1251.5	1251.5	1251.5	1251.5	1251.5	1251.5	1251.5	1251.5	1251.5	1217	411.5	371	323	340.5	412	210.5	214	325	347.5	336.5	700	371	367.5	361	369.5	408.5	374.5	356.5	303.5	306.5	733.5	262	2160.5	430.5	415.5	358	1018.5	635	635	1193.5	349.5	339.5	1171.5
598	809.5	809.5	809.5	809.5	809.5	809.5	809.5	809.5	809.5	809.5	809.5	809.5	809.5	809.5	809.5	821.5	421.5	382.5	337.5	277	400	234.5	209.5	441	444.5	429	604.5	504.5	490.5	594	609	576	622.5	426.5	387.5	387	525.5	484	583.5	437	414.5	587.5	596	651	651	528.5	617	582	547
517.5	591	591	591	591	591	591	591	591	591	591	591	591	591	591	591	528.5	270.5	260.5	254.5	254	303	179	179.5	422	418	421.5	460.5	506.5	478.5	350.5	522.5	435.5	531	372.5	386	404.5	374	416.5	344.5	312	306	421.5	396	294.5	294.5	407.5	549.5	548	335.5
372	435.5	435.5	435.5	435.5	435.5	435.5	435.5	435.5	435.5	435.5	435.5	435.5	435.5	435.5	435.5	409	326.5	286	365.5	335	310.5	307	242	413	436	463	725	398.5	390.5	291.5	363	799	773	589	470.5	442	528	271	342.5	312.5	312	413	473	598	598	316	380.5	354.5	413.5
433.5	495.5	495.5	495.5	495.5	495.5	495.5	495.5	495.5	495.5	495.5	495.5	495.5	495.5	495.5	495.5	499	329	322.5	351.5	356.5	333.5	255	251	416.5	445	436	383	459	454.5	409.5	485	3004.5	2257.5	392	367	370	382	420.5	333.5	292.5	315.5	480	380.5	406.5	406.5	367.5	458.5	468.5	361
288.5	384.5	384.5	384.5	384.5	384.5	384.5	384.5	384.5	384.5	384.5	384.5	384.5	384.5	384.5	384.5	397	306	288	289.5	286.5	243.5	273.5	213.5	451	490.5	456	372.5	435	412	377.5	450.5	706	696	509	415	382	392	285.5	447	306	332	298.5	468	492.5	492.5	338.5	428.5	409.5	467.5
287	376.5	376.5	376.5	376.5	376.5	376.5	376.5	376.5	376.5	376.5	376.5	376.5	376.5	376.5	376.5	376.5	291.5	270	307.5	298.5	262.5	259	206	450	506.5	471.5	355.5	418.5	391.5	371	441.5	728	722.5	500.5	424	380	406.5	297.5	455.5	285.5	316.5	342.5	512	449.5	449.5	363	423.5	413	467.5
359	407	407	407	407	407	407	407	407	407	407	407	407	407	407	407	465	372	321	299.5	346	346	287.5	252.5	482.5	490.5	466.5	609	380.5	386	342	402.5	795.5	828.5	472	409	365.5	467.5	295	394.5	397.5	401.5	367.5	446	554	554	343.5	382.5	362.5	408
572	526	526	526	526	526	526	526	526	526	526	526	526	526	526	526	487.5	344	302	299	273	303	222.5	222	460	444	432	460	460.5	467.5	412.5	557.5	610.5	673	413	397	372.5	353	402.5	264.5	307	291	442	320	440	440	353.5	575	551	290.5
562	567.5	567.5	567.5	567.5	567.5	567.5	567.5	567.5	567.5	567.5	567.5	567.5	567.5	567.5	567.5	556.5	338.5	303	310.5	289.5	314	237	211	459.5	461.5	471	429	442	443.5	409	612.5	632	651	417.5	396.5	384.5	353	425	314.5	302	324.5	501	325	464.5	464.5	368	585	518	292
657	635.5	635.5	635.5	635.5	635.5	635.5	635.5	635.5	635.5	635.5	635.5	635.5	635.5	635.5	635.5	559.5	374.5	335.5	355	345.5	351.5	238	199.5	383	393	392	389	511	477	366.5	531.5	596	652.5	397.5	368.5	376	304	519.5	369.5	361.5	345.5	553	326	419.5	419.5	343	678	602	296
535	499	499	499	499	499	499	499	499	499	499	499	499	499	499	499	522	365	300.5	303	313.5	332.5	258	195	422.5	423	445.5	424.5	433	433	409.5	530	672	634	377.5	380	359.5	312	412	341	337	339.5	518.5	326.5	446.5	446.5	356.5	539	517	295.5
325	298.5	298.5	298.5	298.5	298.5	298.5	298.5	298.5	298.5	298.5	298.5	298.5	298.5	298.5	298.5	295.5	256.5	213.5	241.5	273.5	221	210	167	473	525	471.5	295	518.5	517.5	284.5	543	393.5	442	522.5	498	459.5	307	312	293	231	220.5	267	256.5	301.5	301.5	304	607	511	280
320	343.5	343.5	343.5	343.5	343.5	343.5	343.5	343.5	343.5	343.5	343.5	343.5	343.5	343.5	343.5	319.5	262.5	247	239	235.5	265.5	179.5	186.5	464	471	457	308	549	564	271.5	550.5	397.5	347	455.5	481.5	491.5	247.5	329.5	244.5	262.5	229.5	302.5	228	315	315	261	510	481	252.5
506.5	654	654	654	654	654	654	654	654	654	654	654	654	654	654	654	612	328.5	292	301.5	312.5	335.5	234	200	621.5	650	636.5	412	1000	999	466.5	1017	500.5	487	603	559	598	391.5	442.5	395.5	324.5	326.5	520	444	430.5	430.5	336.5	1203.5	1156	372.5
554.5	598	598	598	598	598	598	598	598	598	598	598	598	598	598	598	599.5	319.5	281.5	311	332.5	325.5	216	186.5	596.5	613	628.5	446	997.5	986.5	425.5	1029	514	520	567.5	547	583	397	444.5	366.5	335	322	492.5	447	396.5	396.5	332.5	1224.5	1155.5	360.5
488.5	574	574	574	574	574	574	574	574	574	574	574	574	574	574	574	598.5	327	274	303.5	326.5	328.5	214.5	195.5	623	623.5	630.5	427.5	996.5	1007	431.5	1081.5	518	480	614.5	560	610	409	416.5	415.5	340	326.5	482	450.5	422.5	422.5	345	1188	1118	384
514.5	664.5	664.5	664.5	664.5	664.5	664.5	664.5	664.5	664.5	664.5	664.5	664.5	664.5	664.5	664.5	618	308	274.5	326.5	331.5	323.5	230	208	606	588	584.5	402	934.5	968	410.5	1056	496	556	605	568	603.5	381.5	422.5	417	337.5	331	451	429.5	397	397	361	1221.5	1117.5	387
611.5	742	742	742	742	742	742	742	742	742	742	742	742	742	742	742	695	325	270.5	255	289	317.5	272.5	248	833	852.5	853	534	602.5	588	465	649	622.5	667	518.5	474.5	446.5	452.5	367	355.5	322	336.5	601	404.5	416.5	416.5	329.5	818	685	394
287.5	358	358	358	358	358	358	358	358	358	358	358	358	358	358	358	344	284.5	261	256.5	270	276	157.5	179.5	417.5	406	433	322.5	376.5	370.5	321	364	476.5	450.5	467	452.5	426.5	317.5	285.5	313	301	283	273	358.5	352.5	352.5	328.5	396.5	392	322
289.5	355.5	355.5	355.5	355.5	355.5	355.5	355.5	355.5	355.5	355.5	355.5	355.5	355.5	355.5	355.5	347	289.5	244	296	287.5	294.5	185.5	176.5	400.5	415	402.5	326.5	389.5	375.5	305.5	375.5	461.5	444	441.5	424	384.5	315.5	292	328	294	290	291	353	314.5	314.5	326	407.5	408	328
292	361.5	361.5	361.5	361.5	361.5	361.5	361.5	361.5	361.5	361.5	361.5	361.5	361.5	361.5	361.5	329.5	320	281	260.5	245.5	296	165.5	140	388.5	400.5	364	261.5	327.5	318.5	296.5	305	389.5	376	401	353	335.5	313.5	289.5	333	295	302.5	300.5	305.5	322	322	287	337	286	350
304.5	403.5	403.5	403.5	403.5	403.5	403.5	403.5	403.5	403.5	403.5	403.5	403.5	403.5	403.5	403.5	386	315.5	310.5	264	265.5	267.5	251	196	350	348	367.5	378	366	353	291	392.5	363	390.5	418.5	341.5	311	348.5	291.5	320	303.5	343.5	284.5	345	400	400	334	374.5	319.5	334
306	394.5	394.5	394.5	394.5	394.5	394.5	394.5	394.5	394.5	394.5	394.5	394.5	394.5	394.5	394.5	394.5	316	279	277	291	316.5	213	177	389.5	417.5	398.5	350	347.5	321.5	277	369	426	435	446.5	408	400	379.5	249	395.5	275.5	284	288.5	362.5	410	410	412	363	337.5	358
303	341	341	341	341	341	341	341	341	341	341	341	341	341	341	341	314	293.5	272.5	254	263	296	174.5	148	360.5	358.5	332.5	283.5	309	306	274.5	319.5	384	375	399	340.5	311.5	337.5	282.5	337	280.5	292	279	338.5	328.5	328.5	258.5	348	303.5	369.5
448	439	439	439	439	439	439	439	439	439	439	439	439	439	439	439	463.5	281	238.5	300.5	304	257.5	179	178	549.5	576	557.5	324	958.5	915	411	864	456	454	540	481	524	267.5	425.5	307	273.5	277.5	414	301	359.5	359.5	350	952.5	922.5	300
327.5	953	953	953	953	953	953	953	953	953	953	953	953	953	953	953	955	414	343.5	328	329.5	417	241	238	337.5	350.5	363.5	1000	360	377	352	329.5	517	483.5	332	278.5	298	2394	275	679.5	394	430.5	456.5	823	573.5	573.5	626.5	311.5	330	794.5
321	784	784	784	784	784	784	784	784	784	784	784	784	784	784	784	816	407.5	372.5	362.5	355.5	437.5	257	222	335.5	342	359	998.5	325.5	319	319	313	534.5	473	352.5	327.5	307	1021	271	660.5	341	379	430.5	752.5	583	583	609	342.5	329	740
321	784	784	784	784	784	784	784	784	784	784	784	784	784	784	784	816	407.5	372.5	362.5	355.5	437.5	257	222	335.5	342	359	998.5	325.5	319	319	313	534.5	473	352.5	327.5	307	1021	271	660.5	341	379	430.5	752.5	583	583	609	342.5	329	740
321	784	784	784	784	784	784	784	784	784	784	784	784	784	784	784	816	407.5	372.5	362.5	355.5	437.5	257	222	335.5	342	359	998.5	325.5	319	319	313	534.5	473	352.5	327.5	307	1021	271	660.5	341	379	430.5	752.5	583	583	609	342.5	329	740
741.5	682	682	682	682	682	682	682	682	682	682	682	682	682	682	682	606	388	343.5	368.5	347.5	361	217	202	379	387.5	380.5	416.5	494	444	404	581.5	567.5	700	384.5	381.5	386	387.5	550	380	382	363.5	532	349.5	450	450	360	701	600.5	379
291.5	368.5	368.5	368.5	368.5	368.5	368.5	368.5	368.5	368.5	368.5	368.5	368.5	368.5	368.5	368.5	365	267	301	271	253.5	244.5	198	205.5	417.5	433	410	346	391	380.5	289	394.5	413.5	398.5	412.5	378	349	312.5	280	353	291.5	302.5	284.5	315.5	369	369	318.5	350.5	338.5	371.5
333	325.5	325.5	325.5	325.5	325.5	325.5	325.5	325.5	325.5	325.5	325.5	325.5	325.5	325.5	325.5	303.5	310	267.5	233	228.5	329.5	207	180	507	501	496	273	472	482	269.5	494.5	404.5	410	536	493.5	526.5	272	283.5	222	287	297	295	279	314	314	255	558.5	522.5	260.5
303.5	305	305	305	305	305	305	305	305	305	305	305	305	305	305	305	295.5	278.5	260	282	287	276	218	169	472.5	494.5	475	306.5	467.5	479.5	252	464	412.5	397	543.5	509	534.5	299	275	228.5	278.5	273.5	290.5	286.5	356	356	283	528.5	505	251
403.5	400.5	400.5	400.5	400.5	400.5	400.5	400.5	400.5	400.5	400.5	400.5	400.5	400.5	400.5	400.5	404.5	371	305	299	348.5	342	315	264	474	478	470.5	489	471.5	450.5	267	555.5	466	525.5	512	512	436	512	336	428	254	285	335.5	413.5	520	520	379.5	474.5	423.5	453.5
562	1041.5	1041.5	1041.5	1041.5	1041.5	1041.5	1041.5	1041.5	1041.5	1041.5	1041.5	1041.5	1041.5	1041.5	1041.5	908	410	384.5	406.5	412.5	444.5	252	220.5	431.5	455	416	593	484	474	626.5	574.5	511	582.5	381	370	320	509	426	555	371.5	369	554	482.5	534.5	534.5	565.5	691.5	566.5	532.5
610.5	927.5	927.5	927.5	927.5	927.5	927.5	927.5	927.5	927.5	927.5	927.5	927.5	927.5	927.5	927.5	868.5	381	383.5	391.5	402.5	429.5	209.5	247	427.5	403.5	387	602.5	433.5	433.5	599.5	583.5	480	601.5	348.5	320	313.5	491	401	607	385.5	385.5	501.5	489.5	557	557	556	703	527.5	515.5
569.5	922.5	922.5	922.5	922.5	922.5	922.5	922.5	922.5	922.5	922.5	922.5	922.5	922.5	922.5	922.5	846	397.5	410	340.5	370	421	196	229	417	426.5	399	606	467.5	427.5	575.5	591.5	424	522.5	355.5	361.5	324.5	497.5	406.5	565.5	392.5	383	475.5	500.5	566	566	543.5	684.5	592.5	547.5
457.5	442	442	442	442	442	442	442	442	442	442	442	442	442	442	442	444.5	298.5	353	281.5	270	274.5	282.5	211.5	761.5	745	779.5	502	508.5	494	421.5	583.5	479	485	513.5	444.5	472	373	382.5	302	330	318	445	302	393.5	393.5	303.5	523.5	517.5	280
443	478.5	478.5	478.5	478.5	478.5	478.5	478.5	478.5	478.5	478.5	478.5	478.5	478.5	478.5	478.5	463.5	286	291	275	246.5	258	289	220.5	754	747.5	753	474	534	496	431	543	517	480.5	493.5	429	454.5	377.5	374.5	310.5	310	317	451.5	289	311	311	293.5	554.5	533	281
412	438	438	438	438	438	438	438	438	438	438	438	438	438	438	438	431.5	382.5	327	329	326.5	347.5	188.5	180.5	427.5	441	439.5	400	475	449.5	406.5	527.5	583.5	557.5	454.5	418.5	420.5	352	391	368	328	371	394	414.5	397.5	397.5	385	462	469.5	352
391	784.5	784.5	784.5	784.5	784.5	784.5	784.5	784.5	784.5	784.5	784.5	784.5	784.5	784.5	784.5	774	434.5	358	357	355	457.5	256.5	294	333	368	343.5	1169.5	320.5	329.5	339	316.5	552.5	649	334.5	335	313	1065.5	268.5	697	384.5	401.5	390.5	698	578	578	662.5	387	350	693.5
411	426	426	426	426	426	426	426	426	426	426	426	426	426	426	426	406.5	385	331	336.5	305	355.5	188	193.5	407	419.5	445	400	475	452	390.5	506	619	564	458	430	415.5	352	394	384	328	360.5	359.5	394.5	396.5	396.5	373	452.5	430.5	338.5
356.5	472	472	472	472	472	472	472	472	472	472	472	472	472	472	472	469.5	397	330.5	307	314.5	352.5	144.5	191.5	460	449.5	460	432	461.5	452.5	375.5	466.5	545.5	558	503	439	441.5	418.5	302	394.5	339.5	357	381	414.5	443.5	443.5	435	529	518	382.5
317	435	435	435	435	435	435	435	435	435	435	435	435	435	435	435	426	394.5	321	319	307	336	161	154.5	496.5	466	502.5	401.5	465	432.5	338	429	556.5	562	512	441	412	398	293.5	394	337.5	339.5	394.5	402.5	410	410	442	474	471.5	402
375	373	373	373	373	373	373	373	373	373	373	373	373	373	373	373	421.5	253.5	216.5	201	243	217.5	271	257	207.5	261.5	205	538	235.5	244.5	344.5	287.5	566	497.5	186.5	180.5	153	343.5	248.5	229	249.5	215.5	420	281	308	308	209	270.5	240	268.5
260.5	871	871	871	871	871	871	871	871	871	871	871	871	871	871	871	884	396	356	363	308	445.5	269	219	316	323	318.5	992.5	313	301	400	342	448.5	426	343.5	365	329.5	1005	244.5	637	442.5	471	397	759.5	565.5	565.5	690.5	271.5	250.5	740
456	490.5	490.5	490.5	490.5	490.5	490.5	490.5	490.5	490.5	490.5	490.5	490.5	490.5	490.5	490.5	503	323.5	336.5	318.5	296.5	319	262	258	539	539	553	785	463	436	336.5	595.5	612	601.5	513	526	459	545	284.5	405.5	318.5	283.5	435.5	435	536.5	536.5	346	494.5	503.5	505
289.5	443	443	443	443	443	443	443	443	443	443	443	443	443	443	443	428	358	263	300	327	342	282.5	245	456	466.5	468	395	474.5	453.5	264.5	521	408	431.5	513.5	510.5	442.5	405	283.5	428	287.5	288	290	427.5	428.5	428.5	419.5	465.5	422.5	419.5
286	377	377	377	377	377	377	377	377	377	377	377	377	377	377	377	367	338.5	303	301.5	331	261.5	165	153	473	454.5	490.5	275.5	481	458.5	273	497	402	373.5	474	459	449.5	281.5	290.5	380.5	287.5	290.5	279.5	339	364	364	354	473	424.5	321.5
405.5	460	460	460	460	460	460	460	460	460	460	460	460	460	460	460	478	328.5	320.5	361.5	312.5	319	262.5	209.5	373	408.5	400	404	459	467	436.5	485	623	571	428.5	396	412.5	319	385	383	302.5	305.5	474	347.5	390	390	333.5	465.5	453.5	305.5
417	499.5	499.5	499.5	499.5	499.5	499.5	499.5	499.5	499.5	499.5	499.5	499.5	499.5	499.5	499.5	531.5	365	304.5	332.5	312.5	332	286	248	385	387	404	381	489.5	458	438.5	485.5	603	571	420.5	397	395	307.5	377.5	318.5	328.5	317	499	337.5	403	403	309.5	485.5	479	298.5
265	291.5	291.5	291.5	291.5	291.5	291.5	291.5	291.5	291.5	291.5	291.5	291.5	291.5	291.5	291.5	295	247	251	266	275.5	268	228.5	184	712.5	671.5	711	333	447	438.5	318	450.5	430.5	370	574	533	555	278.5	284.5	255.5	246	250.5	282.5	311	287.5	287.5	304	428.5	428	313
293	282.5	282.5	282.5	282.5	282.5	282.5	282.5	282.5	282.5	282.5	282.5	282.5	282.5	282.5	282.5	299	235	252.5	249.5	257.5	268.5	224	210	723	713	750.5	346	448.5	441	307	472	427.5	400	562	576.5	577.5	300	266.5	251.5	237	268	307	297.5	290.5	290.5	307	478	470	310.5
736.5	624.5	624.5	624.5	624.5	624.5	624.5	624.5	624.5	624.5	624.5	624.5	624.5	624.5	624.5	624.5	579.5	271.5	294.5	272.5	262.5	271.5	244.5	210.5	499.5	513.5	510	396	481.5	487	408.5	582.5	610.5	617	441	429.5	446.5	341	579.5	302	326	318	454	349.5	416.5	416.5	318	602.5	545	332.5
379	457	457	457	457	457	457	457	457	457	457	457	457	457	457	457	422	282.5	301	273.5	257	291	172	185.5	438	431.5	453	335	478	447	337.5	489.5	430	445	401.5	356.5	323	323	420	312.5	261.5	261	296	379.5	401.5	401.5	366	469	458.5	342
432.5	394	394	394	394	394	394	394	394	394	394	394	394	394	394	394	405.5	301	249	245.5	234.5	294.5	173	152	374	392	384.5	319	565	519	363	579	425.5	413	480	453	451	325	417.5	337	285.5	277.5	329	368	353	353	320.5	471.5	492	345
446.5	431.5	431.5	431.5	431.5	431.5	431.5	431.5	431.5	431.5	431.5	431.5	431.5	431.5	431.5	431.5	427.5	289.5	252	268	281.5	280	179.5	157.5	455.5	466.5	458	434	485	430	390.5	528.5	560	527	468.5	424.5	416.5	347.5	460	296.5	297	316	418.5	365	379	379	336.5	492	486.5	319
645	611	611	611	611	611	611	611	611	611	611	611	611	611	611	611	572	319	301.5	263	272	315.5	237	204.5	474	462.5	480.5	428.5	457	458.5	443	614.5	595.5	606.5	423.5	362	384	342.5	509	324.5	319	283.5	462.5	367	425	425	369	595	553.5	325
665	534	534	534	534	534	534	534	534	534	534	534	534	534	534	534	501	288.5	308	313	308.5	279.5	221.5	187.5	490	498.5	490.5	474	574	540.5	439.5	585.5	607	581.5	477	455.5	473.5	365	599.5	329.5	317.5	320.5	494.5	378	421	421	345.5	603.5	580.5	331.5
368.5	473	473	473	473	473	473	473	473	473	473	473	473	473	473	473	449.5	287	268	316.5	320.5	284	154.5	167.5	388	416.5	393	317	364.5	345.5	285.5	459.5	485	423	452.5	398.5	396.5	346.5	409	345	291	297	301.5	312	373.5	373.5	394	443.5	407	312
368	410.5	410.5	410.5	410.5	410.5	410.5	410.5	410.5	410.5	410.5	410.5	410.5	410.5	410.5	410.5	402	332	313.5	312	318.5	294	138	156.5	368	391	389	342.5	371	355	320.5	464	460.5	407.5	445.5	398	389.5	325	399	357	314	310	290	319	336	336	379.5	419.5	385	322.5
502.5	539	539	539	539	539	539	539	539	539	539	539	539	539	539	539	532	296.5	281	321.5	327	328	223	220	376	389	375	401.5	411	418.5	481.5	526.5	546	531.5	407	383	380	318.5	443	318	307	281.5	405.5	364	373.5	373.5	307	618	521.5	307.5
352	391.5	391.5	391.5	391.5	391.5	391.5	391.5	391.5	391.5	391.5	391.5	391.5	391.5	391.5	391.5	422.5	303.5	281	229.5	271	312	185	193.5	533	514	523	386.5	780	762	291	708	424.5	425.5	498.5	469.5	461.5	302	397	403.5	312.5	311.5	311	390	380.5	380.5	386.5	725.5	705	324.5
317	359	359	359	359	359	359	359	359	359	359	359	359	359	359	359	384	284	337.5	343.5	318.5	300.5	247.5	186	333	349	357	348.5	398	370.5	301	473.5	424.5	486	400	362	348	372.5	335	282.5	298.5	333	370.5	288.5	371	371	386.5	431.5	364	315
401	509.5	509.5	509.5	509.5	509.5	509.5	509.5	509.5	509.5	509.5	509.5	509.5	509.5	509.5	509.5	464.5	330	317.5	324.5	309	324	177.5	165	406.5	423.5	444.5	431.5	483	484.5	422	534.5	576	593.5	416.5	452.5	427.5	425.5	359	401.5	302	321.5	423.5	423	397	397	418.5	517	545.5	339
282	381	381	381	381	381	381	381	381	381	381	381	381	381	381	381	365	266	264	265.5	257	241	175	180	384.5	396.5	435	265	429	406	250.5	393	428.5	405	370.5	380	389	287	284.5	345.5	297.5	264.5	295	311.5	348.5	348.5	355	420.5	396.5	301.5
314.5	361	361	361	361	361	361	361	361	361	361	361	361	361	361	361	348	276	266.5	281	274	258.5	164	189	337	361	380.5	268	404.5	375	240.5	407.5	439.5	417.5	397.5	374.5	370	319.5	301.5	359	304	277	306	313.5	361	361	374	406	417	296
269	386	386	386	386	386	386	386	386	386	386	386	386	386	386	386	353	278.5	246	261	259	266.5	180	174.5	392.5	390	383.5	244	393	387.5	263.5	379	402	398	407.5	422.5	377.5	304.5	261.5	335.5	277	268.5	295.5	297.5	347	347	316.5	420	397	279.5
272	347.5	347.5	347.5	347.5	347.5	347.5	347.5	347.5	347.5	347.5	347.5	347.5	347.5	347.5	347.5	338	288.5	254.5	282	260.5	257	154.5	154.5	393	396	402	255	397	392	243	395	403.5	383	395.5	401.5	371	324	244.5	335	289.5	287.5	301	306	365.5	365.5	297.5	393	388	307
307	383	383	383	383	383	383	383	383	383	383	383	383	383	383	383	406.5	316	268	325	345	295	209.5	179.5	520	518.5	514	376.5	453.5	436.5	327.5	434.5	578.5	570	513	498	408.5	396	330.5	412.5	361	345.5	358.5	450	517.5	517.5	406	411.5	402	451.5
309	404.5	404.5	404.5	404.5	404.5	404.5	404.5	404.5	404.5	404.5	404.5	404.5	404.5	404.5	404.5	395.5	324.5	259.5	323.5	338.5	291	241.5	173	536.5	537.5	521	418	468.5	445.5	331.5	460	595.5	573	499.5	483	426	422.5	323.5	397.5	366	323	348	448	531	531	414	437	413	432
315	391.5	391.5	391.5	391.5	391.5	391.5	391.5	391.5	391.5	391.5	391.5	391.5	391.5	391.5	391.5	390.5	309.5	275.5	307.5	336.5	311.5	221	179.5	511.5	509.5	524	394.5	442.5	431.5	321	445.5	606.5	570	510	460.5	415.5	418.5	329.5	371	363	315.5	340	442	532.5	532.5	398.5	425	408	426.5
303	326.5	326.5	326.5	326.5	326.5	326.5	326.5	326.5	326.5	326.5	326.5	326.5	326.5	326.5	326.5	354	384	330.5	315	343	369	207.5	174.5	502.5	487.5	501	327.5	427.5	430.5	275	486	486	547.5	492	453.5	452.5	381	297	363	322	335	341.5	330.5	499.5	499.5	380	413.5	379	368.5
386	367.5	367.5	367.5	367.5	367.5	367.5	367.5	367.5	367.5	367.5	367.5	367.5	367.5	367.5	367.5	379	398.5	326.5	374.5	361.5	415.5	277.5	233	478	528	493	446.5	466.5	454.5	287.5	458.5	550.5	671.5	529	541	496	509	296.5	395.5	382	368.5	374.5	492.5	562.5	562.5	407.5	403	374.5	507.5
314	417	417	417	417	417	417	417	417	417	417	417	417	417	417	417	425	402	357	346	377.5	382.5	228	228	488.5	510	478	477	426.5	440.5	279.5	474	582.5	654	506.5	494.5	444.5	446	289.5	413	370.5	372	377	484.5	534.5	534.5	448	435	375.5	478.5
345	422	422	422	422	422	422	422	422	422	422	422	422	422	422	422	421.5	289.5	304	299.5	318.5	237.5	247	189	392.5	397	392	334.5	423	421.5	277	406.5	408	453.5	495.5	477	475.5	370	348.5	377.5	276.5	303.5	330	310.5	430	430	343.5	420	387.5	349.5
370	446	446	446	446	446	446	446	446	446	446	446	446	446	446	446	436	335.5	287	299.5	311	251.5	233.5	176.5	403	415.5	411.5	297	422.5	399.5	276	419	473	493	477.5	448.5	442.5	332.5	357.5	387.5	291	302.5	369	323	407.5	407.5	344.5	428	430.5	359
354	403	403	403	403	403	403	403	403	403	403	403	403	403	403	403	385	294.5	296.5	306.5	277.5	250.5	214	174	372.5	396.5	408	285	389	379	300	360.5	437	500	507.5	484.5	455.5	325	347	378.5	283.5	310	335	289	397	397	336	408	370	369
339	797.5	797.5	797.5	797.5	797.5	797.5	797.5	797.5	797.5	797.5	797.5	797.5	797.5	797.5	797.5	809.5	361	332	285	333	381	237.5	213.5	342	317.5	322.5	943	365.5	335.5	345.5	331.5	561	463	326	283	270.5	916	305	715	374	403.5	371	770.5	529.5	529.5	681.5	325	318.5	727
382	795.5	795.5	795.5	795.5	795.5	795.5	795.5	795.5	795.5	795.5	795.5	795.5	795.5	795.5	795.5	778.5	341	343.5	314.5	354	388.5	227.5	207	317	313	291	950.5	373.5	368	332.5	347.5	527	532.5	328	321.5	309	920	335.5	660.5	381	414.5	395.5	779	601	601	670.5	342.5	378.5	745
336.5	420.5	420.5	420.5	420.5	420.5	420.5	420.5	420.5	420.5	420.5	420.5	420.5	420.5	420.5	420.5	448.5	335.5	274.5	318	339.5	314.5	248.5	276.5	716.5	732	707.5	279.5	544	515.5	402.5	608	503	503	631	646.5	568	361	346	289	270.5	286	415	327.5	387.5	387.5	313	569	567.5	343.5
334	416	416	416	416	416	416	416	416	416	416	416	416	416	416	416	409	331.5	292	285	261.5	320	211.5	138.5	464	472	487.5	320.5	640.5	656	364	627	435.5	385	543	542.5	537	330	310.5	373.5	355.5	354	350	395.5	419.5	419.5	380	624.5	644.5	334
352.5	349	349	349	349	349	349	349	349	349	349	349	349	349	349	349	337	293	261	248	243	243	133	120.5	350	366.5	357.5	246.5	456.5	445.5	242	395.5	388	396	491	457	478	304.5	338	320.5	271	279	281	301	322.5	322.5	327.5	453.5	440.5	312.5
287.5	362.5	362.5	362.5	362.5	362.5	362.5	362.5	362.5	362.5	362.5	362.5	362.5	362.5	362.5	362.5	348.5	280.5	252.5	233	262.5	263	175.5	154	399	412.5	408	310	376.5	370.5	280	364.5	366.5	395	405.5	389.5	394	299.5	305	393	250.5	266	324.5	307.5	331.5	331.5	332.5	408	415	325.5
307.5	387	387	387	387	387	387	387	387	387	387	387	387	387	387	387	368	303	306.5	317.5	324.5	255.5	174	179.5	412	413	430	327.5	379.5	373	260	390	407	388	447	429.5	393.5	274	300.5	376.5	278.5	300	367	333	398.5	398.5	330.5	460	427	331.5
312.5	303	303	303	303	303	303	303	303	303	303	303	303	303	303	303	306.5	308	316	277	294.5	283	158.5	162	485	471.5	487	265	582.5	584.5	351.5	603.5	373.5	356	433	476	451	268	328.5	279	338	353	301	283.5	298.5	298.5	268	590.5	560.5	267.5
348.5	344.5	344.5	344.5	344.5	344.5	344.5	344.5	344.5	344.5	344.5	344.5	344.5	344.5	344.5	344.5	292	326	306.5	288	311	295.5	188.5	190	500	494.5	490.5	266	620.5	634.5	355	632	410.5	407	474	483	463.5	279	364.5	251.5	287	287.5	301.5	258.5	372.5	372.5	271	685.5	634	271
334	414	414	414	414	414	414	414	414	414	414	414	414	414	414	414	394.5	248.5	242	262	245	233.5	319	263	195.5	226.5	211.5	550.5	258.5	221.5	299.5	305	454.5	517	201	241	149.5	337	287.5	295	257	222	347	277	362	362	230.5	308	270.5	316
326	340.5	340.5	340.5	340.5	340.5	340.5	340.5	340.5	340.5	340.5	340.5	340.5	340.5	340.5	340.5	347	211.5	229	244	227.5	212.5	244.5	256.5	224.5	217.5	198.5	486.5	272	243.5	294.5	255	484.5	438	205	177.5	166	334	259.5	243	253.5	235	365	314	317.5	317.5	190	263.5	238.5	301.5
217.5	256.5	256.5	256.5	256.5	256.5	256.5	256.5	256.5	256.5	256.5	256.5	256.5	256.5	256.5	256.5	264	217	216.5	235.5	229.5	206.5	247	225	215	229	232.5	350.5	223.5	224.5	251	270	373.5	357.5	175.5	180	144.5	286.5	234.5	205.5	237	190	337.5	312.5	309.5	309.5	227	232.5	253.5	272.5
217.5	256.5	256.5	256.5	256.5	256.5	256.5	256.5	256.5	256.5	256.5	256.5	256.5	256.5	256.5	256.5	264	217	216.5	235.5	229.5	206.5	247	225	215	229	232.5	350.5	223.5	224.5	251	270	373.5	357.5	175.5	180	144.5	286.5	234.5	205.5	237	190	337.5	312.5	309.5	309.5	227	232.5	253.5	272.5
217.5	256.5	256.5	256.5	256.5	256.5	256.5	256.5	256.5	256.5	256.5	256.5	256.5	256.5	256.5	256.5	264	217	216.5	235.5	229.5	206.5	247	225	215	229	232.5	350.5	223.5	224.5	251	270	373.5	357.5	175.5	180	144.5	286.5	234.5	205.5	237	190	337.5	312.5	309.5	309.5	227	232.5	253.5	272.5
217.5	256.5	256.5	256.5	256.5	256.5	256.5	256.5	256.5	256.5	256.5	256.5	256.5	256.5	256.5	256.5	264	217	216.5	235.5	229.5	206.5	247	225	215	229	232.5	350.5	223.5	224.5	251	270	373.5	357.5	175.5	180	144.5	286.5	234.5	205.5	237	190	337.5	312.5	309.5	309.5	227	232.5	253.5	272.5
217.5	256.5	256.5	256.5	256.5	256.5	256.5	256.5	256.5	256.5	256.5	256.5	256.5	256.5	256.5	256.5	264	217	216.5	235.5	229.5	206.5	247	225	215	229	232.5	350.5	223.5	224.5	251	270	373.5	357.5	175.5	180	144.5	286.5	234.5	205.5	237	190	337.5	312.5	309.5	309.5	227	232.5	253.5	272.5
217.5	256.5	256.5	256.5	256.5	256.5	256.5	256.5	256.5	256.5	256.5	256.5	256.5	256.5	256.5	256.5	264	217	216.5	235.5	229.5	206.5	247	225	215	229	232.5	350.5	223.5	224.5	251	270	373.5	357.5	175.5	180	144.5	286.5	234.5	205.5	237	190	337.5	312.5	309.5	309.5	227	232.5	253.5	272.5
217.5	256.5	256.5	256.5	256.5	256.5	256.5	256.5	256.5	256.5	256.5	256.5	256.5	256.5	256.5	256.5	264	217	216.5	235.5	229.5	206.5	247	225	215	229	232.5	350.5	223.5	224.5	251	270	373.5	357.5	175.5	180	144.5	286.5	234.5	205.5	237	190	337.5	312.5	309.5	309.5	227	232.5	253.5	272.5
217.5	256.5	256.5	256.5	256.5	256.5	256.5	256.5	256.5	256.5	256.5	256.5	256.5	256.5	256.5	256.5	264	217	216.5	235.5	229.5	206.5	247	225	215	229	232.5	350.5	223.5	224.5	251	270	373.5	357.5	175.5	180	144.5	286.5	234.5	205.5	237	190	337.5	312.5	309.5	309.5	227	232.5	253.5	272.5
217.5	256.5	256.5	256.5	256.5	256.5	256.5	256.5	256.5	256.5	256.5	256.5	256.5	256.5	256.5	256.5	264	217	216.5	235.5	229.5	206.5	247	225	215	229	232.5	350.5	223.5	224.5	251	270	373.5	357.5	175.5	180	144.5	286.5	234.5	205.5	237	190	337.5	312.5	309.5	309.5	227	232.5	253.5	272.5
217.5	256.5	256.5	256.5	256.5	256.5	256.5	256.5	256.5	256.5	256.5	256.5	256.5	256.5	256.5	256.5	264	217	216.5	235.5	229.5	206.5	247	225	215	229	232.5	350.5	223.5	224.5	251	270	373.5	357.5	175.5	180	144.5	286.5	234.5	205.5	237	190	337.5	312.5	309.5	309.5	227	232.5	253.5	272.5
252	281	281	281	281	281	281	281	281	281	281	281	281	281	281	281	314.5	208	194	209.5	197	189.5	265	217.5	186.5	218	217	315.5	239	259	279.5	226.5	353	333	212.5	160.5	143	296	226	211.5	197.5	214.5	342	245	292	292	238	221	226	262
291.5	267	267	267	267	267	267	267	267	267	267	267	267	267	267	267	303.5	227.5	221.5	216.5	238	201	318	204	202.5	192.5	201.5	380.5	234	230	313	257.5	369	410.5	173	162.5	127	383	224.5	232.5	204	211	386	282.5	312	312	244	227.5	218.5	277.5
314.5	313.5	313.5	313.5	313.5	313.5	313.5	313.5	313.5	313.5	313.5	313.5	313.5	313.5	313.5	313.5	326	200.5	208.5	221.5	219.5	193.5	246.5	222	218.5	219	205	375	249.5	266.5	299	257.5	359	392	188.5	196	151	313.5	230.5	254.5	214	222	310	291.5	329	329	206.5	254	257.5	290.5
295.5	284	284	284	284	284	284	284	284	284	284	284	284	284	284	284	304	198.5	176.5	191.5	205.5	223	223	222.5	188	183.5	182	319.5	247	281.5	260	268	316	302.5	199	161	141.5	285	232	214	187.5	190.5	283.5	308	251	251	206.5	271.5	265	289.5
306.5	339.5	339.5	339.5	339.5	339.5	339.5	339.5	339.5	339.5	339.5	339.5	339.5	339.5	339.5	339.5	336.5	210.5	226	223	204	236	141.5	152	339	378	347	258	437	465	237	549.5	376	335.5	430	430	397	287.5	289	327.5	220	266	252	277.5	315	315	362	529.5	509.5	317
299	321	321	321	321	321	321	321	321	321	321	321	321	321	321	321	308.5	245.5	225	256.5	273.5	240.5	149	141	377.5	393.5	363	274	494	469	199	504.5	427.5	429.5	459	442	407.5	318.5	297.5	338	224.5	263.5	243.5	291.5	320.5	320.5	359.5	569	526	269.5
283.5	309.5	309.5	309.5	309.5	309.5	309.5	309.5	309.5	309.5	309.5	309.5	309.5	309.5	309.5	309.5	302	223.5	228.5	191	208.5	233	139.5	166.5	377.5	390.5	356	255.5	470.5	464.5	209	511	381	349	454.5	445.5	389.5	282	297	301	225	249.5	187.5	279	304.5	304.5	286.5	577	529.5	267.5
239.5	252.5	252.5	252.5	252.5	252.5	252.5	252.5	252.5	252.5	252.5	252.5	252.5	252.5	252.5	252.5	270.5	149	183.5	162	152	160	225.5	217	184.5	170	163.5	231.5	250.5	247	205	227	235	250.5	156.5	176.5	141.5	273.5	199	206.5	158.5	162.5	224	198.5	210	210	187.5	257	255	213.5
252.5	332	332	332	332	332	332	332	332	332	332	332	332	332	332	332	308.5	157.5	165.5	169.5	182.5	181.5	194	229	176.5	164.5	176.5	268	232.5	234	245	257.5	267.5	282.5	144.5	165	129.5	262.5	207	206.5	197.5	174.5	258.5	179.5	226	226	189.5	284.5	260	209.5
144	168.5	168.5	168.5	168.5	168.5	168.5	168.5	168.5	168.5	168.5	168.5	168.5	168.5	168.5	168.5	173.5	114	144.5	137	121.5	141	145	125	164	154	150	166	178	176.5	158.5	202.5	199.5	146.5	187.5	161.5	129	187	125.5	158	124.5	125	166.5	166	156	156	130.5	202	198.5	189
159	183.5	183.5	183.5	183.5	183.5	183.5	183.5	183.5	183.5	183.5	183.5	183.5	183.5	183.5	183.5	173.5	124	173	147	139.5	144.5	181.5	163.5	171.5	171	193	177.5	146.5	176	189.5	188.5	212.5	191	150.5	166.5	136	181.5	148.5	167.5	126.5	145	168.5	175	185	185	187	182	201.5	208
255.5	356	356	356	356	356	356	356	356	356	356	356	356	356	356	356	344	243.5	252	212	214.5	247	186	151.5	915.5	902.5	916	243.5	609	583	286.5	528	453.5	402	556	553	550	272	268	295	232.5	241.5	275	318	318	318	279	567.5	551.5	328
262	367	367	367	367	367	367	367	367	367	367	367	367	367	367	367	364	232.5	248	234.5	222	238	196.5	135.5	909.5	909.5	916.5	260	582	563.5	280	518.5	454.5	411	574	564	559	282	263	298	229	235.5	283	328	321.5	321.5	281.5	559.5	552	333.5
288	260	260	260	260	260	260	260	260	260	260	260	260	260	260	260	266	303.5	330.5	294.5	290	284.5	244.5	223	396.5	426	371	326	301.5	322.5	265	336	382	486.5	345	344.5	315.5	343.5	310	315.5	328.5	341.5	322.5	222	368.5	368.5	293.5	378	343.5	257
375	453.5	453.5	453.5	453.5	453.5	453.5	453.5	453.5	453.5	453.5	453.5	453.5	453.5	453.5	453.5	448	312.5	272	336	375.5	299.5	313.5	258	1114.5	1110	1095	551.5	493.5	478	297	547	538.5	601	558	543	503.5	563	321.5	414.5	282.5	312	359.5	465	482.5	482.5	377.5	493.5	441	473.5
326	487	487	487	487	487	487	487	487	487	487	487	487	487	487	487	472	351.5	303	343	363.5	328	245.5	218	1139.5	1163.5	1136	543.5	528.5	500.5	283	583.5	607.5	612.5	578.5	568.5	517.5	530	299	469	323.5	325	353	511	509.5	509.5	376.5	497	465.5	457
429	433	433	433	433	433	433	433	433	433	433	433	433	433	433	433	434.5	254.5	238.5	234.5	239	300.5	201	175	335	331.5	323.5	332.5	445.5	446.5	422.5	521	452	443.5	387.5	399	410.5	327	386	305.5	225.5	228.5	377.5	339.5	319	319	269	506	524.5	271.5
401	332	332	332	332	332	332	332	332	332	332	332	332	332	332	332	350.5	242	231	280.5	279	262.5	230.5	181	527	532.5	474	388	578	577	389	651	543.5	559.5	581.5	533.5	473	363.5	440.5	317	237.5	231	275	285	426.5	426.5	404.5	583	581	281.5
394.5	425.5	425.5	425.5	425.5	425.5	425.5	425.5	425.5	425.5	425.5	425.5	425.5	425.5	425.5	425.5	393	286.5	258	322	319	303	235	185.5	526	515.5	541	365	546.5	558.5	383	770	630.5	632.5	594.5	580	516.5	339.5	403	354	264.5	275.5	367.5	301	418	418	398.5	632	591	331
423	464.5	464.5	464.5	464.5	464.5	464.5	464.5	464.5	464.5	464.5	464.5	464.5	464.5	464.5	464.5	433.5	287	279	303	319	317.5	253	192.5	514	531	516	386	534.5	544	466	743.5	607	670.5	571.5	588	544	391.5	418.5	335.5	259	269	377.5	278	423.5	423.5	356	610.5	542.5	263
558	595.5	595.5	595.5	595.5	595.5	595.5	595.5	595.5	595.5	595.5	595.5	595.5	595.5	595.5	595.5	565	284.5	248	274	283.5	290	233.5	187	515.5	508.5	533.5	365	622	641.5	411	783	595.5	585.5	669.5	639.5	631.5	332	434.5	278.5	234	247	510	352.5	349	349	374	776	719.5	311
292.5	445	445	445	445	445	445	445	445	445	445	445	445	445	445	445	420	351	312	321.5	317.5	342.5	259.5	202.5	1031	1052.5	1065	405.5	511	527.5	333	520	526	491.5	522.5	537	503	430.5	257	386.5	360	364	352.5	467.5	562	562	388	556	529	436
268.5	389.5	389.5	389.5	389.5	389.5	389.5	389.5	389.5	389.5	389.5	389.5	389.5	389.5	389.5	389.5	378.5	344	331.5	314.5	316	339	235.5	221.5	1141	1151.5	1173.5	390.5	585.5	541.5	308	615.5	539	511.5	607.5	599.5	575	500.5	263.5	350	339.5	343	376.5	437.5	528	528	367.5	498.5	499	425
301	447	447	447	447	447	447	447	447	447	447	447	447	447	447	447	421	317.5	320.5	319	301	322	254.5	212.5	1146	1149.5	1149.5	467.5	580	568.5	265.5	594	505.5	492.5	575.5	610	601.5	430	276.5	354.5	331	347.5	354.5	395	476	476	319	497.5	473	423
336.5	378.5	378.5	378.5	378.5	378.5	378.5	378.5	378.5	378.5	378.5	378.5	378.5	378.5	378.5	378.5	385	312.5	312.5	313	361.5	316	197.5	184	1136	1162	1126	369	503.5	490	312.5	542.5	532	523.5	532.5	556.5	541	371	315.5	327.5	295	305	379	355.5	469	469	286	522.5	498.5	402.5
251	494.5	494.5	494.5	494.5	494.5	494.5	494.5	494.5	494.5	494.5	494.5	494.5	494.5	494.5	494.5	471	375.5	332.5	334.5	358.5	301.5	220.5	194	1055.5	1070	1093	443	566	563	344	549.5	501.5	517	604.5	568	545	482	248	418	357.5	371.5	355.5	454	532.5	532.5	411	572.5	510	446
284	436.5	436.5	436.5	436.5	436.5	436.5	436.5	436.5	436.5	436.5	436.5	436.5	436.5	436.5	436.5	403.5	333.5	351.5	328.5	295.5	295	302	208	547	577.5	544.5	465.5	569	530.5	328.5	523.5	615	612.5	501	481.5	447	493.5	263	332.5	331	342.5	362.5	460	647	647	348	539.5	520.5	452
300.5	434	434	434	434	434	434	434	434	434	434	434	434	434	434	434	408	315	347	317.5	313.5	301	285	251	546	557	540	460.5	563	528	303.5	547	552	604	496	494	450	482	288.5	336.5	344.5	354.5	332.5	442.5	624	624	365	558	490	479.5
296	419.5	419.5	419.5	419.5	419.5	419.5	419.5	419.5	419.5	419.5	419.5	419.5	419.5	419.5	419.5	430.5	318.5	348	299	279	292.5	285	235.5	538.5	570	534.5	453	542	508	286	507.5	605	647.5	487	485	440	445.5	257	354	292.5	306.5	354.5	461.5	610.5	610.5	370.5	512	482	495
335.5	391.5	391.5	391.5	391.5	391.5	391.5	391.5	391.5	391.5	391.5	391.5	391.5	391.5	391.5	391.5	391	296.5	256.5	285.5	290	252	235.5	181	798.5	814.5	790.5	330.5	505	511.5	281	506.5	549	539.5	554	595	552.5	385.5	281	361	316	250.5	315.5	389.5	441	441	357	510	478	407
337	459	459	459	459	459	459	459	459	459	459	459	459	459	459	459	405	277	268.5	269	289.5	245.5	253	261.5	739.5	729.5	744.5	381	490	485	288.5	525.5	545.5	493	559.5	579	541.5	402.5	308	432.5	320.5	277	292.5	398.5	434	434	348.5	491	460.5	439
327.5	384	384	384	384	384	384	384	384	384	384	384	384	384	384	384	370.5	382.5	290.5	311.5	304	334	207	198.5	400	370.5	399	281.5	398	383	322	388	368.5	349.5	413	374	364	340.5	302	339	332	322.5	386	381	469	469	342.5	337	305	371.5
277	372	372	372	372	372	372	372	372	372	372	372	372	372	372	372	380.5	284.5	245.5	265	273	260.5	171.5	169	864	878.5	868	296.5	572.5	566	309	567.5	484.5	461.5	569	588	563	288.5	281	288	275.5	281	314.5	367.5	322.5	322.5	304.5	585	545.5	340.5
295.5	350.5	350.5	350.5	350.5	350.5	350.5	350.5	350.5	350.5	350.5	350.5	350.5	350.5	350.5	350.5	282	229.5	197.5	238	229.5	228	271.5	227	302.5	321.5	343	301	319.5	329	228	328.5	414	409.5	360.5	355.5	308.5	341	298.5	352.5	198.5	207.5	269	367	340	340	345	374.5	385.5	382.5
423	923.5	923.5	923.5	923.5	923.5	923.5	923.5	923.5	923.5	923.5	923.5	923.5	923.5	923.5	923.5	923	390	348.5	308.5	341	373.5	268.5	227.5	358.5	387	357	826	430.5	385.5	469.5	454.5	595.5	555	385.5	303	288.5	810.5	412.5	788	350	355.5	472	766.5	516.5	516.5	676.5	409	407.5	737
764.5	685	685	685	685	685	685	685	685	685	685	685	685	685	685	685	655	292	289	318.5	378.5	302.5	280.5	252	563.5	574.5	556	558.5	983.5	1013	535.5	1058.5	473.5	530	611.5	624.5	621	373	614.5	370.5	293	265.5	530.5	447	439	439	383.5	1287	1141.5	396.5
294	562	562	562	562	562	562	562	562	562	562	562	562	562	562	562	571.5	418	466.5	392.5	352.5	437.5	244	201.5	408	420	407.5	493.5	385	345	355.5	370.5	477	514.5	466	406	323	500.5	325	614.5	442	472.5	377.5	609	2443	2443	528.5	363.5	379	575.5
273	821.5	821.5	821.5	821.5	821.5	821.5	821.5	821.5	821.5	821.5	821.5	821.5	821.5	821.5	821.5	834.5	395	422.5	374	356	366.5	256.5	226	403.5	389	373	1053.5	399.5	377	435.5	420.5	545	622.5	399.5	351.5	320	977.5	281	741	434.5	413	468.5	775	636	636	686.5	361	341	762
273	821.5	821.5	821.5	821.5	821.5	821.5	821.5	821.5	821.5	821.5	821.5	821.5	821.5	821.5	821.5	834.5	395	422.5	374	356	366.5	256.5	226	403.5	389	373	1053.5	399.5	377	435.5	420.5	545	622.5	399.5	351.5	320	977.5	281	741	434.5	413	468.5	775	636	636	686.5	361	341	762
273	821.5	821.5	821.5	821.5	821.5	821.5	821.5	821.5	821.5	821.5	821.5	821.5	821.5	821.5	821.5	834.5	395	422.5	374	356	366.5	256.5	226	403.5	389	373	1053.5	399.5	377	435.5	420.5	545	622.5	399.5	351.5	320	977.5	281	741	434.5	413	468.5	775	636	636	686.5	361	341	762
273	821.5	821.5	821.5	821.5	821.5	821.5	821.5	821.5	821.5	821.5	821.5	821.5	821.5	821.5	821.5	834.5	395	422.5	374	356	366.5	256.5	226	403.5	389	373	1053.5	399.5	377	435.5	420.5	545	622.5	399.5	351.5	320	977.5	281	741	434.5	413	468.5	775	636	636	686.5	361	341	762
185.5	248.5	248.5	248.5	248.5	248.5	248.5	248.5	248.5	248.5	248.5	248.5	248.5	248.5	248.5	248.5	221	203	186.5	193	205	179.5	222.5	174	215	185	193.5	206.5	254	184	185	218	245	193	157.5	175	141.5	194.5	162	203.5	180	155	245.5	222	218.5	218.5	186.5	186	201.5	159
202	257.5	257.5	257.5	257.5	257.5	257.5	257.5	257.5	257.5	257.5	257.5	257.5	257.5	257.5	257.5	252.5	166	185.5	151.5	149	168	207.5	193.5	204	188.5	218.5	214	245	265	209	228.5	235	212	215	168.5	161.5	219.5	174.5	163.5	144	167	213	205.5	217.5	217.5	211	226	210.5	176
169.5	188.5	188.5	188.5	188.5	188.5	188.5	188.5	188.5	188.5	188.5	188.5	188.5	188.5	188.5	188.5	221	170.5	152.5	178	180	163.5	185.5	187	144	140.5	143	204.5	167	153	179	193.5	203.5	205.5	150	150.5	124	196.5	134.5	203	150	166.5	202	197	224.5	224.5	166	167.5	185.5	198
480	570.5	570.5	570.5	570.5	570.5	570.5	570.5	570.5	570.5	570.5	570.5	570.5	570.5	570.5	570.5	582.5	361	359	284.5	289	313	189.5	171	333.5	335	342.5	473.5	422.5	457.5	631.5	512.5	424.5	416	338	331.5	330.5	375	453	446	397.5	387	507.5	428	448.5	448.5	409	461.5	482.5	376.5
333.5	426	426	426	426	426	426	426	426	426	426	426	426	426	426	426	438	312.5	282.5	340	328.5	321.5	201.5	202.5	283.5	295.5	301.5	401.5	388.5	369	775	396	457	441.5	320.5	297.5	296	385	294	354	301	306	417.5	384	430.5	430.5	359.5	368	347.5	379
372	495	495	495	495	495	495	495	495	495	495	495	495	495	495	495	512	335.5	299	301	282.5	344.5	205.5	204	293	292	291.5	436.5	413	402	1661.5	352	437	443	324	305	300.5	402.5	331	380.5	322	318	473	392	413	413	363.5	459.5	447.5	352.5
301.5	401.5	401.5	401.5	401.5	401.5	401.5	401.5	401.5	401.5	401.5	401.5	401.5	401.5	401.5	401.5	380.5	374	361.5	354	346.5	313	233.5	267	340.5	380	366	479	272	288.5	326.5	325	470	460.5	300	306.5	304	474.5	261.5	367.5	416.5	385	357.5	491	467.5	467.5	390.5	290	291	473.5
387	405	405	405	405	405	405	405	405	405	405	405	405	405	405	405	430	270.5	298.5	234.5	244.5	273	251	197.5	679.5	722	725	353	582	530	401.5	565.5	622	555.5	508	476.5	477	306.5	357.5	287.5	273	269.5	443	321.5	300.5	300.5	256.5	550.5	572	290.5
392.5	438	438	438	438	438	438	438	438	438	438	438	438	438	438	438	429	284	296	286.5	279	260.5	249.5	202.5	676.5	708	704.5	336	561.5	518	403.5	581	588	573	521	533.5	484	303.5	365	273	276	264	477.5	311.5	318	318	287	557.5	594.5	307.5
349	874	874	874	874	874	874	874	874	874	874	874	874	874	874	874	901	388.5	386	279	288.5	371	236.5	223.5	333	309	330	1472	339.5	363.5	395.5	402	533.5	570	321	316.5	285	1030.5	273.5	741	369	349	466	849	569	569	749.5	362	344	814.5
514	454	454	454	454	454	454	454	454	454	454	454	454	454	454	454	439	305.5	299	254.5	322.5	301.5	252.5	245.5	922.5	941	951	447	597	560	435	630.5	547	571.5	549	523.5	508	406	434.5	330.5	285.5	314.5	469	411	429.5	429.5	373.5	687.5	625	418.5
521	464	464	464	464	464	464	464	464	464	464	464	464	464	464	464	444	308.5	296	254.5	317.5	300.5	250.5	253.5	922.5	941	949	453	599	557	432	622.5	544	572.5	545	523.5	508	408	427.5	327.5	275.5	308.5	475	406	435.5	435.5	379.5	684.5	626.5	417.5
443	390	390	390	390	390	390	390	390	390	390	390	390	390	390	390	358.5	279	267	272	254	265.5	215.5	208.5	944	999	989	313.5	560	537	361	632	513.5	466.5	571	534.5	541.5	277.5	437	293	262.5	282.5	403	294.5	325	325	260	532	562.5	305
556.5	442.5	442.5	442.5	442.5	442.5	442.5	442.5	442.5	442.5	442.5	442.5	442.5	442.5	442.5	442.5	427.5	310.5	285.5	275	295	296	264	235	944	999	989	422.5	592.5	575	417	663	575	514	571	550	541.5	380.5	490.5	328	280	282.5	470.5	382	446.5	446.5	395.5	676.5	649.5	415
463.5	477.5	477.5	477.5	477.5	477.5	477.5	477.5	477.5	477.5	477.5	477.5	477.5	477.5	477.5	477.5	492	323.5	303.5	325	338.5	307	265	239	998	1013	1031.5	444.5	620	565	463.5	656	533	548.5	566.5	601	519.5	430.5	421.5	364	316	324.5	406.5	373.5	430.5	430.5	379	674.5	640	404
463.5	477.5	477.5	477.5	477.5	477.5	477.5	477.5	477.5	477.5	477.5	477.5	477.5	477.5	477.5	477.5	492	323.5	303.5	325	338.5	307	265	239	998	1013	1031.5	444.5	620	565	463.5	656	533	548.5	566.5	601	519.5	430.5	421.5	364	316	324.5	406.5	373.5	430.5	430.5	379	674.5	640	404
500.5	481.5	481.5	481.5	481.5	481.5	481.5	481.5	481.5	481.5	481.5	481.5	481.5	481.5	481.5	481.5	489	300	284	301	289.5	271	210.5	221.5	998.5	1018	1040.5	409	607.5	560	449	639	557	531.5	598	599	528.5	409	426	382	308	313.5	417.5	365	431.5	431.5	392	708.5	633.5	403.5
458.5	510	510	510	510	510	510	510	510	510	510	510	510	510	510	510	485.5	309.5	290.5	325.5	311.5	313.5	218	188.5	973	979	1012	435.5	592.5	568.5	491	649.5	530	552	570.5	580	523.5	460.5	424.5	343	318	322	430.5	377	391	391	389	700.5	639	399
454	501	501	501	501	501	501	501	501	501	501	501	501	501	501	501	483	303	294.5	325.5	311.5	313.5	218	188.5	988	987	1024.5	432	598.5	569.5	491	651	540.5	573	583	584.5	523.5	455	420	344.5	314	322	433.5	369.5	388.5	388.5	389	700.5	639	391
474.5	471.5	471.5	471.5	471.5	471.5	471.5	471.5	471.5	471.5	471.5	471.5	471.5	471.5	471.5	471.5	490	289	267	309.5	294	268.5	241.5	220.5	968.5	961.5	963	418	587	568.5	424	630	524.5	515.5	581	590	532.5	407	476.5	365.5	303.5	306.5	390.5	394	419.5	419.5	384.5	673.5	616.5	447
474.5	471.5	471.5	471.5	471.5	471.5	471.5	471.5	471.5	471.5	471.5	471.5	471.5	471.5	471.5	471.5	490	289	267	309.5	294	268.5	241.5	220.5	968.5	961.5	963	418	587	568.5	424	630	524.5	515.5	581	590	532.5	407	476.5	365.5	303.5	306.5	390.5	394	419.5	419.5	384.5	673.5	616.5	447
425	411.5	411.5	411.5	411.5	411.5	411.5	411.5	411.5	411.5	411.5	411.5	411.5	411.5	411.5	411.5	434.5	345.5	332.5	267	286.5	293.5	188.5	203.5	1034.5	1065.5	1024	374.5	509	522.5	362.5	570.5	516	498	582.5	597	549.5	342	389.5	339	301	280.5	364	359	363.5	363.5	366.5	600.5	589	332.5
390.5	395.5	395.5	395.5	395.5	395.5	395.5	395.5	395.5	395.5	395.5	395.5	395.5	395.5	395.5	395.5	384	322	266.5	232	221.5	282	162.5	208.5	423.5	458	424.5	389.5	444.5	479	266	505	374	436.5	410	439.5	435.5	349	338.5	345.5	292.5	292	343.5	335	345.5	345.5	299.5	570.5	514.5	296
208	317	317	317	317	317	317	317	317	317	317	317	317	317	317	317	333	270.5	180.5	166	209	260.5	163	157	341.5	364.5	346.5	317.5	317.5	328	223	380	261.5	275	330.5	310.5	298.5	261.5	199	288	233	231.5	241.5	225	214	214	247.5	334	328.5	224.5
318.5	361	361	361	361	361	361	361	361	361	361	361	361	361	361	361	371	291.5	342	278.5	295.5	317.5	222	167	1111.5	1137	1148	288.5	524.5	496.5	279	498.5	478.5	426	579.5	561.5	532.5	382.5	269	354	294.5	284.5	341.5	337.5	372	372	354.5	521.5	504	324
603.5	653.5	653.5	653.5	653.5	653.5	653.5	653.5	653.5	653.5	653.5	653.5	653.5	653.5	653.5	653.5	588.5	277.5	295.5	297.5	323.5	304.5	207.5	219	576.5	572.5	558.5	429	1058	1061.5	552.5	977	477	563.5	545	561.5	589.5	375.5	458.5	347	338	316.5	463.5	403	366.5	366.5	389.5	1235.5	1144.5	347
636.5	657	657	657	657	657	657	657	657	657	657	657	657	657	657	657	660.5	281	295.5	306.5	303.5	285.5	236	223.5	562.5	571	564	404	1065.5	1066	482.5	952	508	496	568.5	555.5	574	376	526.5	363.5	325	305	494	440.5	364	364	362.5	1216.5	1151	367.5
569.5	597.5	597.5	597.5	597.5	597.5	597.5	597.5	597.5	597.5	597.5	597.5	597.5	597.5	597.5	597.5	547	328	291.5	263	279	283	208	178	412	427	452.5	429	464.5	411.5	454	542.5	690	617	471.5	468.5	474.5	357	412	304.5	301.5	305	502.5	361	437	437	315	510	504	349
530.5	567.5	567.5	567.5	567.5	567.5	567.5	567.5	567.5	567.5	567.5	567.5	567.5	567.5	567.5	567.5	585.5	323	261	281.5	281	318	202.5	176	625.5	598.5	624	476	895	891	396.5	2269	469	517.5	573.5	585.5	558.5	373.5	510.5	358	273	281.5	420	371.5	328	328	362.5	965	909	370
544	604	604	604	604	604	604	604	604	604	604	604	604	604	604	604	526.5	277	277	270.5	298	270.5	195	176	544	535	541.5	372	882.5	868	435	834.5	512	535	600.5	544.5	578.5	342.5	426	325	292	289	505.5	352	333	333	341	956.5	907	357
249	1285.5	1285.5	1285.5	1285.5	1285.5	1285.5	1285.5	1285.5	1285.5	1285.5	1285.5	1285.5	1285.5	1285.5	1285.5	1275	415.5	403.5	325	349.5	446	247.5	240	328	333.5	289	738.5	381	379.5	388.5	379	424	381	349	300.5	293.5	750.5	267.5	1886.5	450	455.5	335	1054	610	610	1306.5	401.5	388.5	1153.5
270.5	1087.5	1087.5	1087.5	1087.5	1087.5	1087.5	1087.5	1087.5	1087.5	1087.5	1087.5	1087.5	1087.5	1087.5	1087.5	1069.5	387	358.5	367.5	384.5	416.5	250	226	302	305	292.5	698.5	374	374	324.5	391	362	404.5	427	392.5	340	758.5	273.5	1259.5	424	414	334.5	945.5	548	548	1260.5	345	335	1002
305	275.5	275.5	275.5	275.5	275.5	275.5	275.5	275.5	275.5	275.5	275.5	275.5	275.5	275.5	275.5	286.5	202.5	162.5	173.5	197	184.5	224	202.5	235.5	202	236	239	297.5	274.5	279.5	246.5	350.5	293	268.5	216	198	225	259.5	247	202	178	259.5	226	309	309	186.5	303	301	259.5
305.5	325.5	325.5	325.5	325.5	325.5	325.5	325.5	325.5	325.5	325.5	325.5	325.5	325.5	325.5	325.5	335	218.5	168.5	212.5	221.5	164	222	215.5	256.5	253	250.5	235	294	290.5	324	335.5	334	301	288	209.5	188.5	279.5	240.5	230	182	177.5	336	231	276.5	276.5	183	365.5	324.5	268
265	250	250	250	250	250	250	250	250	250	250	250	250	250	250	250	282	187.5	165.5	185.5	216	165	193	221	211.5	204	205	305.5	264	262	254	269	309	308	246	206	232	250	310	201	201	201.5	218.5	183	287.5	287.5	209.5	334.5	285	207
445	270	270	270	270	270	270	270	270	270	270	270	270	270	270	270	256.5	321.5	273.5	257.5	289.5	294	132	164	295	303.5	301	255.5	345.5	317	248	306.5	250	278	369	368.5	357	343	418.5	260.5	224	221	232	321.5	300.5	300.5	271.5	309	285.5	283.5
360.5	401.5	401.5	401.5	401.5	401.5	401.5	401.5	401.5	401.5	401.5	401.5	401.5	401.5	401.5	401.5	417	337	336.5	309	306	342	245	182.5	616	608.5	610	362.5	606	628.5	335	705.5	496.5	502.5	623	541	479.5	390	309.5	350	355.5	317	358	372	448.5	448.5	389	654	663.5	340
339.5	374.5	374.5	374.5	374.5	374.5	374.5	374.5	374.5	374.5	374.5	374.5	374.5	374.5	374.5	374.5	339	340	323	293	309	327.5	171.5	175.5	357	357	351.5	368	357.5	363	262.5	409.5	374.5	423.5	343.5	341.5	292	312	343.5	294.5	320	331.5	335	319	356	356	301	406.5	382.5	301.5
636.5	590.5	590.5	590.5	590.5	590.5	590.5	590.5	590.5	590.5	590.5	590.5	590.5	590.5	590.5	590.5	665	322.5	307	283	272.5	307.5	254	274	590	575.5	583	511.5	583.5	563	444	684	596.5	666	553.5	555	583.5	403.5	457.5	312	302.5	301.5	445.5	316	405	405	360.5	714	677.5	300.5
343.5	520.5	520.5	520.5	520.5	520.5	520.5	520.5	520.5	520.5	520.5	520.5	520.5	520.5	520.5	520.5	466	314	309.5	338.5	343.5	316	211	186	409	393.5	430.5	396.5	469.5	459.5	403.5	525.5	548	537.5	419.5	430.5	399.5	435.5	345.5	396	296	312	365	422	413.5	413.5	426.5	521	478.5	360
256.5	986.5	986.5	986.5	986.5	986.5	986.5	986.5	986.5	986.5	986.5	986.5	986.5	986.5	986.5	986.5	975	317	313.5	358	342.5	301.5	283	235	347	350.5	339.5	675	290.5	284.5	365.5	360	381	406	369.5	344.5	318.5	750.5	272.5	801	345	378	371.5	799.5	536	536	755.5	309.5	297	796
458	520	520	520	520	520	520	520	520	520	520	520	520	520	520	520	514	401	379	385	369	365	186.5	179.5	398.5	375.5	363	555	435.5	423	564.5	470	508.5	528	397	375.5	401.5	451	423.5	386	378	371	529	490	488	488	408	494.5	474.5	443
474.5	487	487	487	487	487	487	487	487	487	487	487	487	487	487	487	504.5	356	298	350	306	315	261.5	189.5	358	391.5	363	430	466.5	412.5	462.5	453	634	592	442	386.5	385.5	360	461	339.5	312.5	288	477	415	418.5	418.5	332.5	465	480	349.5
598.5	682	682	682	682	682	682	682	682	682	682	682	682	682	682	682	600	325.5	298	318	303	293.5	254.5	210.5	369	401.5	351	465.5	433	444.5	452.5	460	636	641	428	391.5	386.5	357.5	483	348	302.5	287	486.5	408	447.5	447.5	366	506.5	460.5	365.5
450	453	453	453	453	453	453	453	453	453	453	453	453	453	453	453	439	359.5	298.5	329	287	320	215	162	337.5	362	361.5	380.5	433.5	439	442	481.5	617.5	554.5	429	394.5	397	345.5	463	329.5	296	284.5	488	383	426.5	426.5	320.5	480.5	496	335
344.5	343.5	343.5	343.5	343.5	343.5	343.5	343.5	343.5	343.5	343.5	343.5	343.5	343.5	343.5	343.5	383	291	268	244.5	241.5	275	219.5	191	330.5	335.5	355.5	343.5	441.5	424.5	394	451.5	448	427.5	361.5	353	350	274.5	344	257	275.5	278	375.5	301	329.5	329.5	303.5	405.5	384	280
274	1209	1209	1209	1209	1209	1209	1209	1209	1209	1209	1209	1209	1209	1209	1209	1210.5	354	311.5	332	319	356.5	171	227	379	368	377.5	823.5	357.5	338	413	407	455	415	406.5	366	329	730	261.5	1176	430.5	403	323.5	2120.5	572.5	572.5	902.5	356	348	2455
506.5	634.5	634.5	634.5	634.5	634.5	634.5	634.5	634.5	634.5	634.5	634.5	634.5	634.5	634.5	634.5	612.5	343.5	322	374.5	372.5	348	225	224	334.5	353	328	578	433.5	431	372	512	397	498	366.5	370	358.5	488.5	392	364	351.5	355	492.5	383.5	483	483	398	570	495.5	343
268.5	438.5	438.5	438.5	438.5	438.5	438.5	438.5	438.5	438.5	438.5	438.5	438.5	438.5	438.5	438.5	437.5	1592.5	2342.5	919	856.5	1504.5	164.5	165	313.5	323	301.5	338	300.5	294.5	251.5	331.5	328.5	343	292	298.5	239.5	380.5	271	397.5	1699.5	1753	803.5	396.5	471.5	471.5	366.5	295.5	286.5	387
233	372.5	372.5	372.5	372.5	372.5	372.5	372.5	372.5	372.5	372.5	372.5	372.5	372.5	372.5	372.5	355.5	846.5	883.5	1102	1068	812	161.5	161.5	305.5	288.5	325	388	289.5	296.5	354	296	367.5	358.5	292	316	241	359.5	213.5	329	836	826	944	381.5	445.5	445.5	357	281	280	356.5
355.5	848.5	848.5	848.5	848.5	848.5	848.5	848.5	848.5	848.5	848.5	848.5	848.5	848.5	848.5	848.5	901	409	415	328.5	336.5	471	247.5	258.5	360.5	353.5	365	1007	319	310.5	337.5	372	492.5	557.5	371.5	417.5	382.5	1065	282	727	424	397	398	765	522	522	635.5	360	309	772
374.5	834.5	834.5	834.5	834.5	834.5	834.5	834.5	834.5	834.5	834.5	834.5	834.5	834.5	834.5	834.5	846.5	388.5	403	383.5	381.5	395.5	245	208	349	332	393.5	938.5	337	304	342	370.5	510	509.5	375	412.5	374	1068	327	681.5	385	401.5	380	786	520	520	637.5	328	303	798
314.5	406.5	406.5	406.5	406.5	406.5	406.5	406.5	406.5	406.5	406.5	406.5	406.5	406.5	406.5	406.5	409	311.5	244.5	301	339.5	299.5	257	233.5	476	462	487.5	394	383	402	359.5	465.5	503.5	455.5	454	450.5	454	394.5	324.5	375.5	264.5	277.5	335	411	479.5	479.5	358	376	338	390.5
307	406	406	406	406	406	406	406	406	406	406	406	406	406	406	406	421	331.5	259	292	288.5	274.5	283	213	478.5	485.5	471	363.5	376.5	398.5	373	449.5	472	488	476.5	431.5	456.5	387	318.5	366.5	272.5	298	347.5	416.5	405	405	355.5	376.5	352	430
669.5	642	642	642	642	642	642	642	642	642	642	642	642	642	642	642	583.5	365.5	346	356.5	358.5	356	229.5	193	386.5	405	406	404	477.5	461.5	418.5	556.5	637	686.5	413.5	396	386	301	549	365.5	368	352	521	371	457.5	457.5	356.5	642.5	573.5	319
354.5	737.5	737.5	737.5	737.5	737.5	737.5	737.5	737.5	737.5	737.5	737.5	737.5	737.5	737.5	737.5	741	309.5	277.5	282.5	273.5	335	225	245.5	333	343	317.5	658	344.5	382.5	400	430	403.5	466.5	351.5	333	301	643	296.5	545.5	322	315	417.5	526	462	462	593	558	486	523
588.5	1130.5	1130.5	1130.5	1130.5	1130.5	1130.5	1130.5	1130.5	1130.5	1130.5	1130.5	1130.5	1130.5	1130.5	1130.5	1054	330.5	285	318	345.5	353	255.5	280.5	363	366.5	345.5	765	391	398.5	453.5	596.5	461	585	358	311.5	310.5	756	351.5	763.5	341	317.5	587	681.5	496.5	496.5	762.5	676.5	561	692
368.5	583.5	583.5	583.5	583.5	583.5	583.5	583.5	583.5	583.5	583.5	583.5	583.5	583.5	583.5	583.5	614	433	411.5	394.5	398	436.5	240	210	369	380.5	390	607.5	362	387.5	518.5	410	567	564.5	353.5	335	311	601.5	340.5	506	478	439	448.5	534	595	595	468	332.5	316	524.5
241.5	794.5	794.5	794.5	794.5	794.5	794.5	794.5	794.5	794.5	794.5	794.5	794.5	794.5	794.5	794.5	806.5	415	406.5	369	315	433.5	298.5	281.5	321	311.5	307	1036.5	335	334	373	351	497.5	542.5	374.5	401	341.5	942	273.5	674.5	419.5	425	429	819	558.5	558.5	667	321	305.5	749.5
247	832	832	832	832	832	832	832	832	832	832	832	832	832	832	832	788	427.5	390	363.5	344	425.5	221.5	241	314.5	310	307	1008	340.5	348.5	367	403	493	523.5	387	409	355.5	945.5	262	681.5	429	440.5	413	873	552.5	552.5	690	326.5	309.5	798.5
250	795.5	795.5	795.5	795.5	795.5	795.5	795.5	795.5	795.5	795.5	795.5	795.5	795.5	795.5	795.5	801	429	430.5	364.5	370	408.5	233.5	200.5	340	350.5	342.5	992.5	346.5	356.5	368.5	407.5	450.5	508.5	398.5	413.5	373	909	256.5	682	406.5	442.5	433.5	865	556	556	699.5	342	313.5	822
311	378.5	378.5	378.5	378.5	378.5	378.5	378.5	378.5	378.5	378.5	378.5	378.5	378.5	378.5	378.5	426.5	211	196	206.5	220	202	258.5	225.5	210	189	194.5	527	244	228.5	310	268	529.5	453.5	170.5	170.5	121	327.5	262.5	227	226.5	207.5	393.5	310	312.5	312.5	186.5	333.5	321	274.5
373.5	371	371	371	371	371	371	371	371	371	371	371	371	371	371	371	329.5	229	216.5	231.5	247.5	222	149.5	135	489	482.5	497.5	331.5	633	628	319.5	677.5	425	457	462	462	495	328	339.5	295	241	224	287.5	373.5	316.5	316.5	338.5	620	634	334
347.5	394.5	394.5	394.5	394.5	394.5	394.5	394.5	394.5	394.5	394.5	394.5	394.5	394.5	394.5	394.5	387	306	274.5	300	285.5	274.5	272	226	367	367	345	385.5	378.5	358	317.5	398.5	532.5	499.5	468	421.5	375	385.5	330.5	364.5	337.5	330.5	346	464	463.5	463.5	326	429	394.5	410
238.5	1186.5	1186.5	1186.5	1186.5	1186.5	1186.5	1186.5	1186.5	1186.5	1186.5	1186.5	1186.5	1186.5	1186.5	1186.5	1180.5	354.5	318	312	309	341.5	177.5	204	295	308.5	303.5	752	364.5	333	434.5	394.5	382	397.5	333	351.5	331.5	677.5	235	1185	381.5	394	326.5	1656	518.5	518.5	927.5	373.5	378	1963.5
324	632	632	632	632	632	632	632	632	632	632	632	632	632	632	632	617.5	379.5	385	394.5	407	399	288.5	230.5	367.5	363.5	387.5	876.5	347	359.5	364	377	586	606.5	361.5	345	283.5	710.5	282	630.5	393.5	397.5	406.5	669	570	570	587	356	355.5	657
322	631	631	631	631	631	631	631	631	631	631	631	631	631	631	631	616.5	381.5	386	394.5	407	401	289.5	230.5	363.5	359.5	383.5	876.5	346	358.5	364	376	586	604.5	357.5	345	281.5	708.5	282	629.5	391.5	395.5	404.5	665	574	574	583	352	351.5	653
303.5	882.5	882.5	882.5	882.5	882.5	882.5	882.5	882.5	882.5	882.5	882.5	882.5	882.5	882.5	882.5	852	391	378	359	350	435	260	260	431.5	440	425	982.5	373	390	413.5	361	430.5	479.5	374	356.5	306	2446	260	658	429.5	433	453	727.5	597.5	597.5	648.5	341.5	317.5	732.5
693.5	743.5	743.5	743.5	743.5	743.5	743.5	743.5	743.5	743.5	743.5	743.5	743.5	743.5	743.5	743.5	702.5	279.5	304	265.5	245	264.5	292	228.5	485	473.5	477.5	485	584	618	503.5	706	534.5	646.5	517.5	488	509.5	380	472.5	370.5	282.5	292	491	329	435.5	435.5	389	928	768.5	400
609.5	716.5	716.5	716.5	716.5	716.5	716.5	716.5	716.5	716.5	716.5	716.5	716.5	716.5	716.5	716.5	704.5	317	312.5	286	267.5	286.5	265	221.5	495	472.5	460	473.5	618.5	623	523.5	654.5	572	613.5	503.5	481	486.5	346.5	524.5	379	268	264.5	533	349	396.5	396.5	384.5	872.5	787	401.5
360.5	418.5	418.5	418.5	418.5	418.5	418.5	418.5	418.5	418.5	418.5	418.5	418.5	418.5	418.5	418.5	407	271.5	225	337.5	300.5	254.5	193	191	462.5	466	460	362.5	556	556.5	423.5	577	441.5	459	595.5	575	575	356	340.5	345.5	243	232	316.5	281.5	401.5	401.5	376	611	586.5	298.5
348	815	815	815	815	815	815	815	815	815	815	815	815	815	815	815	826.5	371	331.5	342	304.5	343.5	300.5	214	346	390.5	331	921	406.5	385.5	413.5	421	597	625	359	358.5	329	940.5	299.5	717	339.5	364	434	717.5	520	520	659	418	405	733.5
256	282.5	282.5	282.5	282.5	282.5	282.5	282.5	282.5	282.5	282.5	282.5	282.5	282.5	282.5	282.5	293	194.5	173	203	186	188	174.5	173	247.5	258	264.5	298	296.5	266.5	232	264.5	327	306	290	289	264.5	223.5	279.5	210.5	182.5	212	285.5	239	246.5	246.5	219	290	264.5	213
289	340.5	340.5	340.5	340.5	340.5	340.5	340.5	340.5	340.5	340.5	340.5	340.5	340.5	340.5	340.5	294.5	302	313.5	234	260	299.5	240.5	233	318.5	349	318	362.5	303	285	272	341	415.5	433.5	337	291	237	350	275	328	290	309.5	295	339.5	426.5	426.5	316	292.5	282	334
266.5	283	283	283	283	283	283	283	283	283	283	283	283	283	283	283	298	327	286.5	268.5	262	312.5	201.5	176.5	288.5	305	286	287.5	329.5	317	253.5	356	391	382.5	332	323	244	333.5	278	332.5	290	310	316.5	309.5	402	402	266	329	293	277
378	365	365	365	365	365	365	365	365	365	365	365	365	365	365	365	341	256.5	238	259.5	262.5	229	160.5	136	668	662	690	293.5	531	489	388.5	490	392	368	500	497	477	335.5	301.5	286.5	245	271.5	282.5	326.5	356	356	291.5	474	454	327
336	391	391	391	391	391	391	391	391	391	391	391	391	391	391	391	358.5	272.5	255	277	263	253	179.5	152	628.5	634.5	649	322	525.5	504	361	465.5	398	386.5	458	460	452	307.5	299	284	277.5	290.5	299.5	353	335.5	335.5	300	498.5	450	314.5
353.5	385	385	385	385	385	385	385	385	385	385	385	385	385	385	385	356.5	282.5	269.5	296	311.5	265.5	218	216	685	644.5	665	331.5	522.5	507.5	356.5	544	344.5	385	479	549.5	474	347	333.5	302	283	287.5	344	359.5	383.5	383.5	340	501.5	457.5	327
250	1311.5	1311.5	1311.5	1311.5	1311.5	1311.5	1311.5	1311.5	1311.5	1311.5	1311.5	1311.5	1311.5	1311.5	1311.5	1304	409	381	320	306	399	224.5	215.5	318.5	301	302	747	370.5	364.5	374	365.5	388.5	348.5	331.5	314	285.5	748	261.5	1927	415	418	330	1035	612	612	1322	355.5	357.5	1144.5
301	466.5	466.5	466.5	466.5	466.5	466.5	466.5	466.5	466.5	466.5	466.5	466.5	466.5	466.5	466.5	455.5	369.5	328	314	316	342.5	166	179.5	470.5	428.5	458	438.5	469	477	319.5	449.5	530.5	592	490	407	421.5	399	326.5	378	331.5	336	352	369	424	424	399.5	529.5	530	357
384	450.5	450.5	450.5	450.5	450.5	450.5	450.5	450.5	450.5	450.5	450.5	450.5	450.5	450.5	450.5	450	359.5	308	352	304	286.5	251.5	240.5	419.5	415	424	691	371.5	361.5	306.5	377.5	906	879	435	392.5	377	541	340	396	281	282	403.5	523.5	618	618	434.5	361.5	332	449
305.5	609	609	609	609	609	609	609	609	609	609	609	609	609	609	609	614.5	398	393.5	394.5	413	368	163	149	335.5	317	323	448	392	394.5	466	437	422	370.5	400.5	349	357	393.5	309.5	446.5	385.5	398.5	474	505.5	493.5	493.5	469	323	312.5	476
242	717	717	717	717	717	717	717	717	717	717	717	717	717	717	717	721.5	263	291.5	260	263.5	273	133	232.5	296	297.5	281	623	359	361.5	394.5	341.5	346.5	346	360	296	334.5	665.5	236	657.5	283	277	304	634	378.5	378.5	591	342.5	338.5	642.5
[truncated: 392 more columns]
