# Supplementary material for: Prediction of drug–target interaction by label propagation with mutual interaction information derived from heterogeneous network
Source: Royal Society of Chemistry journal article supplement (doi:10.1039/c5mb00615e), 2015-12-01
Supplement: c5mb00615e9.xlsx [file c5mb00615e9.xlsx]

## Sheet: DT network
Table S15 kinase inhibition constant (Ki) dataset drug-target interaction network
6.6	NaN	5.1	5.1	5.1	5.9	5.7	8	NaN	NaN	7.2	5.7	NaN	NaN	5.1	5.2	5.2	NaN	5.1	4	5.2	5.9	5.1	5	NaN	NaN	NaN	5.1	5.6	5.4	5.4	6.2	6.2	5.5	6.7	5.2	5.1	5.2	5.2	5.9	5	5.2	NaN	5.1	5.4	6.7	6.9	6.2	6.7	5.8
NaN	NaN	5.1	5.1	5	NaN	6	NaN	NaN	NaN	NaN	5.2	NaN	NaN	5.1	5.2	5.2	NaN	5.1	NaN	5	NaN	5.1	5	NaN	NaN	NaN	5.1	NaN	NaN	5.1	5.2	NaN	5.2	5.1	NaN	5.1	NaN	5.2	NaN	5	5.2	NaN	5.1	5.7	NaN	NaN	NaN	NaN	NaN
NaN	NaN	NaN	NaN	NaN	NaN	NaN	NaN	NaN	NaN	NaN	NaN	NaN	NaN	NaN	NaN	NaN	NaN	NaN	NaN	NaN	NaN	NaN	NaN	NaN	NaN	NaN	4.9	5.4	NaN	NaN	NaN	NaN	NaN	NaN	NaN	NaN	NaN	NaN	NaN	NaN	NaN	NaN	NaN	NaN	NaN	NaN	NaN	NaN	NaN
NaN	NaN	NaN	NaN	NaN	NaN	NaN	NaN	NaN	NaN	NaN	NaN	NaN	NaN	NaN	NaN	NaN	NaN	NaN	NaN	NaN	NaN	NaN	NaN	5.6	5.7	6.9	NaN	NaN	NaN	NaN	NaN	NaN	NaN	NaN	NaN	NaN	NaN	NaN	NaN	NaN	NaN	NaN	NaN	NaN	NaN	NaN	NaN	NaN	NaN
6.2	NaN	5.1	5.1	5	NaN	NaN	7.5	NaN	NaN	NaN	5.1	NaN	NaN	NaN	NaN	NaN	NaN	7.8	NaN	5	NaN	7.8	7.8	NaN	NaN	NaN	NaN	7.1	5.4	NaN	NaN	5.8	NaN	5.1	NaN	NaN	NaN	5.2	5.9	NaN	7	NaN	NaN	NaN	7.7	5.5	6.6	5.4	NaN
6.2	NaN	6.9	6.4	6.4	NaN	NaN	5.8	NaN	NaN	NaN	5.1	NaN	NaN	NaN	NaN	NaN	NaN	5.1	NaN	5	NaN	5.1	5.1	NaN	NaN	NaN	5.4	5.7	5.4	NaN	NaN	5.6	NaN	5.1	NaN	NaN	NaN	5.2	6.2	NaN	5.2	NaN	NaN	NaN	5.7	5.5	5.8	5.4	NaN
6.8	NaN	5.1	5.1	5	NaN	NaN	5.8	NaN	NaN	NaN	5.1	NaN	NaN	NaN	NaN	NaN	NaN	NaN	NaN	5.3	7	7	5.8	NaN	NaN	NaN	5.4	6.2	5.4	NaN	NaN	5.7	NaN	5.1	NaN	NaN	NaN	6.4	5.9	NaN	5.3	NaN	NaN	NaN	5.7	5.5	5.8	5.4	NaN
NaN	NaN	NaN	NaN	NaN	NaN	NaN	NaN	NaN	NaN	NaN	NaN	NaN	NaN	NaN	NaN	NaN	NaN	NaN	4	NaN	NaN	NaN	NaN	NaN	5.5	NaN	NaN	NaN	NaN	NaN	NaN	NaN	NaN	NaN	NaN	NaN	NaN	NaN	NaN	NaN	NaN	NaN	NaN	NaN	NaN	NaN	NaN	NaN	NaN
NaN	NaN	NaN	NaN	NaN	NaN	NaN	NaN	NaN	NaN	NaN	NaN	NaN	NaN	NaN	NaN	NaN	NaN	NaN	NaN	NaN	NaN	5.4	5.2	NaN	NaN	NaN	NaN	NaN	NaN	NaN	NaN	NaN	NaN	NaN	NaN	NaN	NaN	NaN	NaN	NaN	NaN	NaN	NaN	NaN	NaN	NaN	NaN	NaN	NaN
NaN	6.3	NaN	NaN	NaN	6.6	NaN	NaN	NaN	NaN	6.2	NaN	6.3	6.1	NaN	NaN	NaN	7.2	NaN	NaN	NaN	NaN	NaN	NaN	NaN	6.6	NaN	NaN	NaN	NaN	6.3	NaN	5.6	6.5	NaN	NaN	NaN	NaN	NaN	NaN	NaN	7.5	7	NaN	NaN	NaN	NaN	NaN	NaN	NaN
7.1	7.2	NaN	NaN	NaN	5.2	NaN	NaN	NaN	NaN	6.2	NaN	5.6	5.3	NaN	NaN	NaN	5.6	NaN	NaN	NaN	NaN	NaN	5.5	5.4	6.1	5.8	5.5	NaN	NaN	5.4	6	5.7	6.2	NaN	NaN	NaN	NaN	NaN	5.4	NaN	5.7	5.6	NaN	NaN	NaN	NaN	NaN	NaN	NaN
6.2	NaN	5.1	5.1	5	5.9	5.7	5.8	NaN	NaN	NaN	5.5	NaN	NaN	NaN	NaN	NaN	NaN	5.1	NaN	5	5.9	5.1	5	NaN	NaN	NaN	5.1	5.3	5.4	5.9	6	5.6	7.9	7.9	NaN	5.5	NaN	6.1	5.9	5	5.2	NaN	NaN	5.4	5.9	5.1	5.8	5.6	NaN
6.2	NaN	5.1	5.1	5	5.9	5.7	5.8	NaN	NaN	5.9	5.1	NaN	NaN	5.1	5.2	5.2	NaN	5.1	NaN	5	5.9	5.1	5	NaN	NaN	NaN	5.1	5.1	5.4	5.1	5	5.6	6.3	7.6	5.2	5.1	5.2	5.2	5.9	5	5.2	NaN	5.1	5.4	5.7	5.2	5.8	5.4	5.8
7.3	5.4	5.1	5.1	5	5.3	5.7	6	NaN	NaN	5.3	5.2	5.6	5.2	5.1	5.2	5.2	5.6	5.1	NaN	5	5.9	5.1	5.2	5.4	5.4	5.8	5.2	5.3	5.4	5.3	5.9	6.8	5.3	5.1	5.2	5.1	5.2	5.4	5.4	5	5.5	5.6	5.1	5.4	5.7	5.5	5.8	5.4	5.8
NaN	NaN	NaN	NaN	NaN	NaN	NaN	NaN	NaN	NaN	NaN	NaN	NaN	NaN	NaN	NaN	NaN	NaN	NaN	NaN	NaN	NaN	NaN	NaN	NaN	NaN	NaN	NaN	NaN	NaN	5.1	5.4	NaN	NaN	NaN	NaN	NaN	NaN	NaN	NaN	NaN	NaN	NaN	NaN	NaN	NaN	NaN	NaN	NaN	NaN
5.6	5.4	5.1	5.1	5	5.2	5.7	5.8	NaN	NaN	5.2	5.1	5.6	5.1	5.1	5.2	5.2	NaN	5.2	NaN	5.2	5.9	5.1	5.5	5.4	5.6	5.8	5.5	5.8	5.5	5.4	6.5	5.6	5.4	5.1	5.2	5.1	NaN	5.2	5.3	5	5.7	5.6	NaN	5.4	5.7	5.1	5.8	5.4	NaN
NaN	NaN	NaN	NaN	NaN	NaN	NaN	NaN	NaN	NaN	NaN	NaN	NaN	NaN	NaN	NaN	NaN	NaN	NaN	NaN	NaN	NaN	NaN	NaN	NaN	NaN	NaN	NaN	NaN	NaN	NaN	NaN	NaN	NaN	NaN	NaN	NaN	NaN	NaN	NaN	NaN	NaN	NaN	NaN	NaN	NaN	NaN	NaN	NaN	NaN
6.2	NaN	5.1	5.1	5	NaN	NaN	6.7	NaN	NaN	5.9	5.8	NaN	NaN	5.2	6	5.8	NaN	6	NaN	5	6	7.1	6	NaN	NaN	NaN	5.9	6.3	NaN	6.2	7.2	6.9	6.5	7.5	5.2	5.7	6	6.3	6.4	5	6.9	NaN	5.1	NaN	5.7	5.5	NaN	5.4	7.3
NaN	4.1	NaN	NaN	NaN	NaN	NaN	NaN	NaN	NaN	NaN	NaN	NaN	NaN	NaN	NaN	NaN	NaN	NaN	NaN	NaN	NaN	NaN	4.3	NaN	4.2	NaN	4.1	NaN	NaN	NaN	4.2	NaN	4	NaN	NaN	NaN	NaN	NaN	4.5	NaN	4.7	4.7	NaN	NaN	NaN	NaN	NaN	NaN	NaN
NaN	NaN	NaN	NaN	NaN	NaN	NaN	NaN	NaN	NaN	NaN	NaN	NaN	NaN	NaN	NaN	NaN	NaN	NaN	NaN	NaN	NaN	NaN	NaN	NaN	NaN	NaN	NaN	NaN	NaN	NaN	NaN	NaN	NaN	NaN	NaN	NaN	NaN	NaN	NaN	NaN	NaN	NaN	NaN	NaN	NaN	NaN	NaN	NaN	NaN
NaN	NaN	NaN	NaN	NaN	NaN	NaN	NaN	NaN	NaN	NaN	NaN	NaN	NaN	NaN	NaN	NaN	NaN	NaN	NaN	NaN	NaN	NaN	NaN	NaN	NaN	NaN	NaN	NaN	NaN	NaN	NaN	NaN	NaN	NaN	NaN	NaN	NaN	NaN	NaN	NaN	NaN	NaN	NaN	NaN	NaN	NaN	NaN	NaN	NaN
NaN	5.4	NaN	NaN	NaN	5.2	NaN	NaN	NaN	NaN	5.2	NaN	NaN	5.4	NaN	NaN	NaN	NaN	NaN	NaN	NaN	NaN	NaN	NaN	5.4	5.4	NaN	6.5	NaN	NaN	5.4	6.1	NaN	5.4	NaN	NaN	NaN	NaN	NaN	5.3	NaN	5.8	NaN	NaN	NaN	NaN	NaN	NaN	NaN	NaN
6.2	NaN	5.1	5.1	5	6.7	7.4	7	NaN	NaN	5.9	5.3	NaN	NaN	5.2	6.2	6.1	NaN	5.1	4	5	5.9	5.1	5	NaN	NaN	NaN	5.1	7.1	5.4	6.4	6.4	7.7	5.7	6.5	5.2	5.7	5.4	5.2	5.9	5	5.2	NaN	5.1	5.4	5.7	5.5	5.8	5.4	6.5
NaN	NaN	NaN	NaN	NaN	NaN	NaN	NaN	NaN	NaN	NaN	NaN	NaN	NaN	NaN	NaN	NaN	NaN	NaN	NaN	NaN	NaN	NaN	NaN	NaN	5.8	NaN	NaN	NaN	NaN	NaN	NaN	NaN	NaN	NaN	NaN	NaN	NaN	NaN	NaN	NaN	NaN	NaN	NaN	NaN	NaN	NaN	NaN	NaN	NaN
NaN	NaN	NaN	NaN	NaN	NaN	NaN	NaN	NaN	NaN	NaN	NaN	NaN	NaN	NaN	NaN	NaN	NaN	NaN	4.7	NaN	NaN	NaN	NaN	NaN	NaN	NaN	NaN	NaN	NaN	NaN	NaN	NaN	NaN	NaN	NaN	NaN	NaN	NaN	NaN	NaN	NaN	NaN	NaN	NaN	NaN	NaN	NaN	NaN	NaN
5.8	5.4	5.1	5.1	5	5.4	5.7	5.8	NaN	NaN	5.4	5.2	5.6	5.2	5.1	5.2	5.2	NaN	5.1	NaN	5	5.9	5.1	5.2	5.4	5.7	5.8	5.2	5.3	5.4	5.3	5.4	6	5.3	5.1	5.2	5.1	5.2	5.2	5.5	5	5.5	5.9	5.1	5.4	5.7	5.1	5.8	5.4	5.8
5.4	5.4	5.1	5.1	5	5.2	NaN	5.8	NaN	NaN	5.2	5.1	5.6	5.4	NaN	NaN	NaN	5.6	5.1	NaN	5	NaN	5.1	5.5	5.4	6.8	5.8	5.3	5	5.4	5.4	5.6	5.6	5.4	5.1	NaN	NaN	NaN	5.2	5.3	NaN	5.7	5.6	NaN	NaN	6.7	5.1	5.8	5.4	NaN
5.5	5.4	5.1	5.1	5	5.2	5.7	5.8	NaN	NaN	5.2	5.2	5.6	5.4	5.1	5.2	5.2	5.6	5.1	NaN	5	5.9	5.1	5.5	5.4	5.4	5.8	5.3	5.2	5.4	5.4	5.6	5.6	6.5	7.4	5.2	5.1	5.2	5.2	5.3	5	5.7	5.6	5.1	5.4	5.9	5.2	5.9	5.4	5.8
6.4	5.4	5.1	5.1	5	5.6	5.7	6	NaN	NaN	5.2	5.3	5.6	5.2	5.1	5.2	5.2	NaN	5.1	4	5	5.9	5.1	5.5	5.4	5.4	5.8	5.2	5.3	5.4	5.4	5.6	5.6	5.4	5.1	5.2	5.1	5.2	5.2	5.3	5	5.7	5.6	5.1	5.4	NaN	5.3	7.7	5.9	5.8
4.4	4.2	4.3	4.3	4.3	5.1	NaN	NaN	NaN	NaN	NaN	5.1	4	NaN	5.1	5.2	5.2	NaN	5.1	NaN	5	NaN	5.1	4.9	NaN	4.2	4.2	5	5.3	NaN	5.1	4.6	4.1	5.2	5.1	5.2	5.1	5.2	5.2	NaN	5	4.3	4.2	5.1	5.4	5	5.1	5.1	NaN	6.4
6.2	NaN	5.1	5.1	5	6.7	6.7	6.9	NaN	NaN	6.1	5.6	NaN	NaN	5.2	5.9	5.7	NaN	5.3	4	5	5.9	5.1	5	NaN	NaN	NaN	5.6	7.3	5.7	6	6.6	7	5.2	5.9	5.2	5.2	5.2	5.4	5.9	5	5.4	NaN	5.1	5.4	5.7	5.5	5.8	5.4	7.6
6.8	5.4	5.1	5.1	5	5.2	6.8	6.1	NaN	NaN	5.2	5.1	5.6	5.4	5.4	5.2	5.2	5.6	5.1	NaN	5	5.9	5.1	5.4	5.4	7.1	5.8	5.2	5.3	5.4	5.4	5.5	6.8	5.4	5.1	5.2	5.1	NaN	5.2	5.5	5	5.7	5.6	NaN	5.4	5.7	6.1	5.8	5.4	NaN
NaN	NaN	NaN	NaN	NaN	NaN	NaN	NaN	NaN	NaN	NaN	NaN	NaN	NaN	NaN	NaN	NaN	NaN	NaN	NaN	NaN	NaN	NaN	NaN	NaN	NaN	NaN	5.3	NaN	NaN	NaN	NaN	NaN	NaN	NaN	NaN	NaN	NaN	NaN	NaN	NaN	NaN	NaN	NaN	NaN	NaN	NaN	NaN	NaN	NaN
NaN	NaN	4.1	4.1	4	NaN	NaN	NaN	NaN	NaN	NaN	NaN	4	NaN	NaN	NaN	NaN	NaN	NaN	4	NaN	NaN	NaN	NaN	NaN	NaN	4.2	4.1	NaN	NaN	NaN	NaN	4.2	NaN	NaN	NaN	NaN	NaN	NaN	NaN	NaN	4.1	NaN	NaN	NaN	NaN	NaN	NaN	NaN	NaN
6.2	NaN	5.1	5.1	5	5.9	5.7	5.8	NaN	NaN	5.9	5.3	NaN	NaN	5.2	5.2	5.2	NaN	5.1	NaN	5	6.6	5.1	5	NaN	NaN	NaN	5.1	5.8	NaN	6.6	7	5.6	5.2	5.7	NaN	5.7	5.5	8.4	6.9	5	7.5	NaN	5.8	NaN	5.7	5.5	5.8	5.4	5.8
NaN	NaN	5.1	5.1	5	NaN	NaN	NaN	NaN	NaN	NaN	5.3	NaN	NaN	5.1	5.2	5.2	NaN	5.1	NaN	5	NaN	5.1	5	NaN	NaN	NaN	5.1	NaN	NaN	5.1	5	5.6	5.2	5.1	5.2	5.1	5.2	5.2	NaN	5	5.2	NaN	5.1	NaN	NaN	5.5	NaN	NaN	NaN
5.9	5.7	NaN	NaN	NaN	5.8	NaN	NaN	NaN	NaN	5.5	NaN	6.2	5.7	NaN	NaN	NaN	NaN	NaN	NaN	NaN	NaN	NaN	5.8	5.7	5.7	6.1	7.1	NaN	NaN	5.7	5.9	5.9	5.7	NaN	NaN	NaN	NaN	NaN	5.6	NaN	6	5.9	NaN	NaN	NaN	NaN	NaN	NaN	NaN
NaN	NaN	NaN	NaN	NaN	NaN	NaN	NaN	NaN	NaN	NaN	NaN	NaN	NaN	NaN	NaN	NaN	NaN	NaN	NaN	NaN	NaN	4.7	NaN	NaN	NaN	NaN	NaN	NaN	NaN	NaN	NaN	NaN	NaN	NaN	NaN	NaN	NaN	NaN	NaN	NaN	NaN	NaN	NaN	NaN	NaN	NaN	NaN	NaN	NaN
NaN	NaN	NaN	NaN	NaN	NaN	NaN	NaN	NaN	NaN	NaN	NaN	NaN	NaN	NaN	NaN	NaN	NaN	NaN	NaN	NaN	NaN	NaN	NaN	NaN	NaN	NaN	NaN	NaN	NaN	NaN	NaN	NaN	NaN	NaN	NaN	NaN	NaN	NaN	NaN	NaN	NaN	NaN	NaN	NaN	NaN	NaN	NaN	NaN	NaN
5.9	5.4	NaN	NaN	NaN	5.7	NaN	NaN	NaN	NaN	5.2	NaN	5.6	5.4	NaN	NaN	NaN	NaN	NaN	NaN	NaN	NaN	NaN	6	5.7	5.4	5.8	5.5	NaN	NaN	5.4	5.9	6.2	6.2	NaN	NaN	NaN	NaN	NaN	5.5	NaN	5.7	5.6	NaN	NaN	NaN	NaN	NaN	NaN	NaN
4.4	4.3	4.1	4.1	4	4.7	NaN	NaN	NaN	NaN	NaN	NaN	4	NaN	NaN	NaN	NaN	NaN	NaN	4	NaN	NaN	NaN	NaN	NaN	NaN	4.2	4.3	NaN	NaN	NaN	6	4.2	5.5	NaN	NaN	NaN	NaN	NaN	4.2	NaN	4.5	4.8	NaN	NaN	7.1	NaN	5.3	NaN	NaN
NaN	NaN	NaN	NaN	NaN	NaN	NaN	NaN	NaN	NaN	NaN	NaN	NaN	NaN	NaN	NaN	NaN	NaN	NaN	NaN	NaN	NaN	NaN	NaN	NaN	NaN	NaN	4.2	NaN	NaN	NaN	4.2	NaN	4.1	NaN	NaN	NaN	NaN	NaN	NaN	NaN	NaN	4.2	NaN	NaN	NaN	NaN	NaN	NaN	NaN
NaN	NaN	NaN	NaN	NaN	NaN	NaN	NaN	NaN	NaN	NaN	NaN	NaN	NaN	NaN	NaN	NaN	NaN	NaN	NaN	NaN	NaN	NaN	NaN	NaN	NaN	NaN	4.8	NaN	NaN	NaN	NaN	NaN	NaN	NaN	NaN	NaN	NaN	NaN	NaN	NaN	NaN	NaN	NaN	NaN	NaN	NaN	NaN	NaN	NaN
NaN	NaN	5.4	5.5	5.1	NaN	NaN	5.8	NaN	NaN	NaN	5.1	NaN	NaN	NaN	NaN	NaN	NaN	5.1	4	5	NaN	5.1	5.3	NaN	NaN	NaN	5.1	5	5.4	NaN	NaN	6.4	NaN	5.1	NaN	NaN	NaN	6.6	5.9	NaN	5.8	NaN	NaN	NaN	5.7	5.1	5.8	5.4	NaN
NaN	NaN	4.1	4.1	4	5.1	NaN	NaN	NaN	NaN	NaN	NaN	NaN	NaN	NaN	NaN	NaN	NaN	NaN	4	NaN	NaN	NaN	NaN	NaN	NaN	NaN	4.1	NaN	NaN	NaN	NaN	4.6	NaN	NaN	NaN	NaN	NaN	NaN	NaN	NaN	NaN	NaN	NaN	NaN	4.7	NaN	4.8	NaN	NaN
NaN	NaN	5.1	5.1	5	NaN	NaN	NaN	NaN	NaN	NaN	5.2	NaN	NaN	5.1	5.2	5.2	NaN	6.5	NaN	5	NaN	5.1	5	NaN	NaN	NaN	5.1	5.3	5.4	5.1	5.5	NaN	5.2	5.1	5.2	5.1	5.2	5.2	NaN	5	5.4	NaN	5.1	5.4	NaN	NaN	NaN	5.4	NaN
6.2	NaN	5.1	5.1	5.4	NaN	NaN	5.8	NaN	NaN	NaN	5.1	NaN	NaN	NaN	NaN	NaN	NaN	6	4	5.4	NaN	6.2	6.8	NaN	5.4	NaN	5.8	5	5.4	NaN	NaN	5.6	NaN	6.9	NaN	NaN	NaN	5.2	6.5	NaN	5.8	NaN	NaN	NaN	5.7	5.1	5.8	5.4	NaN
6.2	NaN	5.1	5.1	5	NaN	NaN	5.8	NaN	NaN	NaN	5.1	NaN	NaN	NaN	NaN	NaN	NaN	5.1	NaN	5	NaN	5.3	5	NaN	NaN	NaN	5.1	5	5.4	NaN	NaN	5.6	NaN	5.1	NaN	NaN	NaN	5.2	5.9	NaN	5.2	NaN	NaN	NaN	5.7	5.5	5.8	5.4	NaN
4.9	4.8	NaN	NaN	NaN	4.5	NaN	NaN	NaN	NaN	4.5	NaN	4.7	4.8	NaN	NaN	NaN	NaN	NaN	NaN	NaN	NaN	NaN	5.2	4.7	5.3	5.4	5.6	NaN	NaN	4.3	6.3	4.8	4.7	NaN	NaN	NaN	NaN	NaN	4.7	NaN	5.7	5.4	NaN	NaN	NaN	NaN	NaN	NaN	NaN
6.2	NaN	5.1	5.1	5	NaN	NaN	5.8	NaN	NaN	5.9	5.3	NaN	NaN	5.1	5.2	5.2	NaN	5.1	NaN	5	5.9	5.1	5	NaN	NaN	NaN	5.1	5.8	NaN	5.1	5	5.6	5.2	5.1	5.2	5.1	5.2	5.2	5.9	5	5.2	NaN	5.1	NaN	5.7	6.4	NaN	5.4	5.8
NaN	NaN	NaN	NaN	NaN	NaN	NaN	NaN	NaN	NaN	NaN	NaN	NaN	NaN	NaN	NaN	NaN	NaN	NaN	NaN	NaN	NaN	NaN	NaN	NaN	NaN	NaN	NaN	NaN	NaN	NaN	4.2	NaN	NaN	NaN	NaN	NaN	NaN	NaN	NaN	NaN	NaN	NaN	NaN	NaN	NaN	NaN	NaN	NaN	NaN
NaN	NaN	NaN	NaN	NaN	NaN	NaN	NaN	NaN	NaN	NaN	NaN	NaN	NaN	NaN	NaN	NaN	NaN	NaN	NaN	NaN	NaN	NaN	5.5	NaN	5.9	NaN	NaN	NaN	NaN	NaN	NaN	NaN	NaN	NaN	NaN	NaN	NaN	NaN	NaN	NaN	NaN	NaN	NaN	NaN	NaN	NaN	NaN	NaN	NaN
NaN	NaN	NaN	NaN	NaN	NaN	NaN	NaN	NaN	NaN	NaN	NaN	NaN	NaN	NaN	NaN	NaN	NaN	NaN	NaN	NaN	NaN	NaN	NaN	NaN	NaN	NaN	NaN	NaN	NaN	NaN	NaN	NaN	NaN	NaN	NaN	NaN	NaN	NaN	NaN	NaN	NaN	NaN	NaN	NaN	NaN	NaN	NaN	NaN	NaN
NaN	NaN	5.1	5.1	5	NaN	5.7	NaN	NaN	NaN	NaN	5.2	NaN	NaN	5.1	5.2	5.2	NaN	5.1	NaN	5	NaN	5.1	5.4	NaN	NaN	NaN	5.1	NaN	NaN	5.3	5	5.6	5.2	5.1	5.2	5.1	5.2	5.2	NaN	5	5.2	NaN	5.1	5.4	NaN	5.5	NaN	5.4	NaN
NaN	NaN	NaN	NaN	NaN	NaN	NaN	NaN	NaN	NaN	NaN	NaN	NaN	NaN	NaN	NaN	NaN	NaN	NaN	NaN	NaN	NaN	NaN	NaN	NaN	NaN	NaN	NaN	NaN	NaN	5.1	NaN	NaN	NaN	NaN	NaN	NaN	NaN	NaN	NaN	NaN	NaN	NaN	NaN	NaN	NaN	NaN	NaN	NaN	NaN
NaN	NaN	NaN	NaN	NaN	NaN	NaN	NaN	NaN	NaN	NaN	NaN	4	NaN	NaN	NaN	NaN	NaN	NaN	NaN	NaN	NaN	NaN	NaN	NaN	NaN	NaN	4.6	NaN	NaN	NaN	NaN	4	NaN	NaN	NaN	NaN	NaN	NaN	NaN	NaN	NaN	NaN	NaN	NaN	NaN	NaN	NaN	NaN	NaN
NaN	NaN	NaN	NaN	5	NaN	NaN	NaN	NaN	NaN	NaN	NaN	NaN	NaN	NaN	NaN	NaN	NaN	NaN	NaN	5	NaN	NaN	5	NaN	NaN	NaN	NaN	NaN	NaN	NaN	NaN	NaN	NaN	NaN	NaN	NaN	NaN	NaN	NaN	5	5.2	NaN	NaN	NaN	NaN	NaN	NaN	NaN	NaN
6.2	NaN	5.1	5.1	5	NaN	NaN	6.5	NaN	NaN	NaN	5.1	NaN	NaN	NaN	NaN	NaN	NaN	5.1	NaN	5	NaN	5.1	5	NaN	NaN	NaN	5.1	5	5.4	NaN	NaN	5.6	NaN	5.7	NaN	NaN	NaN	7.2	6	NaN	6.3	NaN	NaN	NaN	5.7	5.5	5.8	5.4	NaN
6.2	NaN	5.1	5.1	5	NaN	NaN	5.8	NaN	NaN	NaN	5.1	NaN	NaN	NaN	NaN	NaN	NaN	5.1	NaN	5	NaN	5.1	5	NaN	NaN	NaN	5.1	5	5.4	NaN	NaN	5.6	NaN	5.1	NaN	NaN	NaN	5.2	5.9	NaN	5.2	NaN	NaN	NaN	5.7	5.1	6.2	5.4	NaN
NaN	NaN	NaN	NaN	NaN	NaN	NaN	NaN	NaN	NaN	NaN	NaN	NaN	NaN	NaN	NaN	NaN	NaN	NaN	NaN	NaN	NaN	NaN	5.6	NaN	NaN	NaN	5.6	NaN	NaN	NaN	5.8	NaN	NaN	NaN	NaN	NaN	NaN	NaN	NaN	NaN	NaN	NaN	NaN	NaN	NaN	NaN	NaN	NaN	NaN
NaN	4.1	NaN	NaN	NaN	NaN	NaN	NaN	NaN	NaN	NaN	NaN	NaN	NaN	NaN	NaN	NaN	NaN	NaN	NaN	NaN	NaN	NaN	4.3	NaN	4.4	4.4	NaN	NaN	NaN	NaN	5	NaN	4.4	NaN	NaN	NaN	NaN	NaN	4.2	NaN	4.7	4.9	NaN	NaN	NaN	NaN	NaN	NaN	NaN
NaN	NaN	5.1	5.1	5	5.9	5.7	5.8	NaN	NaN	5.9	5.4	NaN	NaN	5.5	5.2	5.5	NaN	5.1	4	5	5.9	5.2	5	NaN	NaN	NaN	5.1	5.9	NaN	5.2	5.8	5.9	5.2	5.5	5.2	5.6	5.2	5.3	5.9	5.2	5.5	NaN	5.1	5.4	5.7	5.5	5.8	5.4	6.1
NaN	NaN	NaN	NaN	NaN	NaN	NaN	NaN	NaN	NaN	NaN	NaN	NaN	NaN	NaN	NaN	NaN	NaN	NaN	NaN	NaN	NaN	NaN	NaN	NaN	NaN	NaN	NaN	NaN	NaN	NaN	5.1	NaN	NaN	NaN	NaN	NaN	NaN	NaN	NaN	NaN	NaN	NaN	NaN	NaN	NaN	NaN	NaN	NaN	NaN
6.2	NaN	5.1	5.1	5	NaN	6.7	6.3	NaN	NaN	6.6	5.8	NaN	NaN	5.1	5.4	5.2	NaN	6.2	4	5	5.9	6.4	5.1	NaN	NaN	NaN	5.1	5.8	NaN	5.1	5.1	7.1	5.2	5.5	NaN	5.1	NaN	5.2	5.9	5	5.2	NaN	5.1	5.4	5.7	5.5	5.8	5.7	6.7
NaN	5.4	5.1	5.1	5	5.2	NaN	NaN	NaN	NaN	NaN	5.3	NaN	5.1	5.1	5.2	5.2	NaN	5.1	NaN	5	NaN	5.1	5.2	5.4	NaN	NaN	5.1	NaN	NaN	5.3	NaN	NaN	5.3	5.1	5.2	5.1	5.2	5.2	NaN	5	NaN	NaN	5.1	NaN	NaN	NaN	NaN	NaN	NaN
NaN	NaN	NaN	NaN	NaN	NaN	NaN	NaN	NaN	NaN	NaN	NaN	NaN	NaN	NaN	NaN	NaN	NaN	NaN	NaN	NaN	NaN	NaN	NaN	NaN	NaN	NaN	NaN	NaN	NaN	NaN	5.1	NaN	NaN	NaN	NaN	NaN	NaN	NaN	NaN	NaN	5.3	NaN	NaN	NaN	NaN	NaN	NaN	NaN	NaN
6.2	NaN	5.1	5.1	5	NaN	NaN	5.8	NaN	NaN	NaN	6	NaN	NaN	NaN	NaN	NaN	NaN	NaN	NaN	5.1	7.5	5.1	5	NaN	NaN	NaN	5.1	5	5.8	NaN	NaN	5.6	NaN	7.5	NaN	NaN	NaN	5.2	5.9	NaN	6.3	NaN	NaN	NaN	5.7	5.5	5.8	5.6	NaN
NaN	NaN	4.3	4.1	4	NaN	NaN	NaN	NaN	NaN	NaN	NaN	NaN	NaN	NaN	NaN	NaN	NaN	NaN	NaN	NaN	NaN	NaN	NaN	NaN	NaN	NaN	4.1	NaN	NaN	NaN	NaN	4.6	NaN	NaN	NaN	NaN	NaN	NaN	NaN	NaN	NaN	NaN	NaN	NaN	4.7	NaN	NaN	NaN	NaN
5.6	5	5.1	5.1	5	4.7	5.7	5.8	NaN	NaN	5.9	5.3	4	NaN	5.1	5.2	5.2	NaN	5.1	4	5	5.9	5.1	5.2	4.2	5.5	4.2	5.1	5.8	NaN	4.6	6	4.3	5.1	5.1	5.2	5.1	5.2	5.2	4.9	5	6	6.1	5.1	5.4	7.3	5.5	5.8	5.4	5.8
5.6	5.5	NaN	NaN	NaN	5.6	NaN	NaN	NaN	NaN	5.5	NaN	6	5.5	NaN	NaN	NaN	NaN	NaN	NaN	NaN	NaN	NaN	5.8	6	6.4	6.6	6.5	NaN	NaN	5.4	6.3	5.6	6.2	NaN	NaN	NaN	NaN	NaN	5.3	NaN	6.3	6.1	NaN	NaN	NaN	NaN	NaN	NaN	NaN
NaN	NaN	NaN	NaN	NaN	NaN	NaN	NaN	NaN	NaN	NaN	NaN	NaN	NaN	NaN	NaN	NaN	NaN	NaN	NaN	NaN	NaN	NaN	NaN	NaN	NaN	4.3	4.5	NaN	NaN	NaN	4.5	NaN	NaN	NaN	NaN	NaN	NaN	NaN	NaN	NaN	NaN	NaN	NaN	NaN	NaN	NaN	NaN	NaN	NaN
NaN	NaN	5.1	5.1	5	NaN	NaN	NaN	NaN	NaN	NaN	5.1	NaN	NaN	NaN	NaN	NaN	NaN	NaN	NaN	5	NaN	5.2	5	NaN	NaN	NaN	5.1	5.1	5.4	NaN	NaN	NaN	NaN	5.1	NaN	NaN	NaN	5.6	6.2	NaN	5.7	NaN	NaN	NaN	NaN	NaN	NaN	5.4	NaN
NaN	NaN	NaN	NaN	NaN	NaN	NaN	NaN	NaN	NaN	NaN	NaN	NaN	NaN	NaN	NaN	NaN	NaN	NaN	NaN	NaN	NaN	NaN	NaN	NaN	NaN	NaN	5.8	NaN	NaN	NaN	5.8	NaN	NaN	NaN	NaN	NaN	NaN	NaN	NaN	NaN	NaN	NaN	NaN	NaN	NaN	NaN	NaN	NaN	NaN
NaN	NaN	NaN	NaN	NaN	NaN	NaN	NaN	NaN	NaN	NaN	NaN	NaN	NaN	NaN	NaN	NaN	NaN	NaN	NaN	NaN	NaN	NaN	NaN	NaN	NaN	NaN	NaN	NaN	NaN	NaN	NaN	NaN	NaN	NaN	NaN	NaN	NaN	NaN	NaN	NaN	NaN	NaN	NaN	NaN	NaN	NaN	NaN	NaN	NaN
NaN	NaN	NaN	NaN	NaN	NaN	NaN	NaN	NaN	NaN	NaN	NaN	NaN	NaN	NaN	NaN	NaN	NaN	NaN	NaN	NaN	NaN	NaN	NaN	NaN	NaN	NaN	4.4	NaN	NaN	NaN	4.4	NaN	NaN	NaN	NaN	NaN	NaN	NaN	NaN	NaN	4.2	NaN	NaN	NaN	NaN	NaN	NaN	NaN	NaN
NaN	NaN	5.9	5.1	5.2	NaN	NaN	5.8	NaN	NaN	NaN	5.1	NaN	NaN	NaN	NaN	NaN	NaN	5.1	NaN	6.4	NaN	5.1	5	NaN	NaN	NaN	5.1	5	5.4	NaN	NaN	5.6	NaN	5.1	NaN	NaN	NaN	5.2	5.9	NaN	5.2	NaN	NaN	NaN	5.7	5.5	5.8	5.4	NaN
NaN	NaN	NaN	NaN	NaN	NaN	NaN	NaN	NaN	NaN	NaN	NaN	NaN	NaN	NaN	NaN	NaN	NaN	NaN	NaN	NaN	NaN	NaN	NaN	NaN	NaN	NaN	NaN	NaN	NaN	NaN	NaN	NaN	NaN	NaN	NaN	NaN	NaN	NaN	NaN	NaN	NaN	NaN	NaN	NaN	NaN	NaN	NaN	NaN	NaN
NaN	5.5	NaN	NaN	NaN	5.2	NaN	NaN	NaN	NaN	5.4	NaN	5.6	5.5	NaN	NaN	NaN	NaN	NaN	NaN	NaN	NaN	NaN	6	5.4	6	6.4	6.5	NaN	NaN	5.4	6.4	NaN	5.7	NaN	NaN	NaN	NaN	NaN	5.3	NaN	6.2	6	NaN	NaN	NaN	NaN	NaN	NaN	NaN
NaN	NaN	5.1	5.1	5	NaN	NaN	NaN	NaN	NaN	NaN	5.2	NaN	NaN	5.1	5.2	5.2	NaN	5.1	NaN	5	NaN	5.1	5	NaN	NaN	NaN	5.1	NaN	NaN	5.1	5.1	5.6	5.2	5.1	5.2	5.1	5.2	5.2	NaN	5	5.2	NaN	5.1	5.4	NaN	5.5	NaN	5.4	NaN
NaN	NaN	NaN	NaN	NaN	NaN	NaN	NaN	NaN	NaN	NaN	NaN	NaN	NaN	NaN	NaN	NaN	NaN	NaN	NaN	NaN	NaN	NaN	NaN	NaN	NaN	NaN	5.8	NaN	NaN	NaN	NaN	NaN	NaN	NaN	NaN	NaN	NaN	NaN	5.4	NaN	NaN	NaN	NaN	NaN	NaN	NaN	NaN	NaN	NaN
NaN	NaN	4.7	4.7	4.6	NaN	NaN	6.4	NaN	NaN	NaN	NaN	NaN	NaN	NaN	NaN	NaN	NaN	5.4	NaN	4.6	NaN	5.3	NaN	NaN	NaN	NaN	4.7	5.1	NaN	NaN	NaN	NaN	NaN	NaN	NaN	NaN	NaN	4.8	NaN	NaN	NaN	NaN	NaN	NaN	NaN	5.3	NaN	5.1	NaN
NaN	NaN	NaN	NaN	NaN	NaN	NaN	NaN	NaN	NaN	NaN	NaN	NaN	5.6	NaN	NaN	NaN	NaN	NaN	NaN	NaN	NaN	NaN	NaN	NaN	NaN	NaN	NaN	NaN	NaN	NaN	NaN	NaN	NaN	NaN	NaN	NaN	NaN	NaN	NaN	NaN	NaN	NaN	NaN	NaN	NaN	NaN	NaN	NaN	NaN
NaN	NaN	5.1	5.1	5	5.9	NaN	NaN	NaN	NaN	NaN	5.1	NaN	NaN	5.1	5.2	5.2	NaN	5.1	NaN	6.2	NaN	5.1	5	NaN	NaN	NaN	5.1	NaN	NaN	5.1	5	NaN	5.2	5.1	5.2	5.1	5.2	5.2	NaN	5	5.2	NaN	5.1	NaN	NaN	NaN	NaN	5.4	NaN
NaN	NaN	NaN	NaN	NaN	NaN	NaN	NaN	NaN	NaN	NaN	NaN	NaN	NaN	NaN	NaN	NaN	NaN	NaN	NaN	NaN	NaN	NaN	NaN	NaN	NaN	NaN	NaN	NaN	NaN	NaN	NaN	NaN	NaN	NaN	NaN	NaN	NaN	5.8	NaN	NaN	NaN	NaN	NaN	NaN	NaN	NaN	NaN	NaN	NaN
6.2	NaN	5.1	5.1	5	5.9	5.7	5.8	NaN	NaN	5.9	5.7	NaN	NaN	5.4	5.7	5.7	NaN	5.2	4	5	7.1	5.1	5	NaN	NaN	NaN	5.1	5.5	5.4	6.3	7.5	5.8	5.2	6	5.6	6.2	5.6	7.5	7.8	5	7.6	NaN	5.7	5.4	6.7	5.1	5.8	5.4	5.8
NaN	NaN	NaN	NaN	NaN	NaN	NaN	NaN	NaN	NaN	NaN	NaN	4	NaN	NaN	NaN	NaN	NaN	NaN	4	NaN	NaN	NaN	NaN	NaN	NaN	NaN	NaN	NaN	NaN	NaN	5	4	NaN	NaN	NaN	NaN	NaN	NaN	NaN	NaN	NaN	NaN	NaN	NaN	NaN	NaN	NaN	NaN	NaN
NaN	NaN	NaN	NaN	NaN	NaN	NaN	NaN	NaN	NaN	NaN	NaN	NaN	NaN	NaN	NaN	NaN	NaN	NaN	NaN	NaN	NaN	NaN	NaN	NaN	NaN	NaN	NaN	NaN	NaN	NaN	NaN	NaN	NaN	NaN	NaN	NaN	NaN	NaN	NaN	NaN	NaN	4.1	NaN	NaN	NaN	NaN	NaN	NaN	NaN
7.1	NaN	5.7	5.5	5.1	5.9	5.7	6.2	NaN	NaN	5.9	5.3	NaN	NaN	5.1	6.7	6	NaN	5.1	NaN	5	6.1	5.1	5	NaN	NaN	NaN	5.1	5.8	NaN	5.1	5	5.6	5.2	5.1	5.2	5.1	5.5	7.1	7.5	5	5.4	NaN	5.1	5.4	5.7	5.5	5.8	5.4	5.8
4.8	4.6	NaN	NaN	NaN	4.2	NaN	NaN	NaN	NaN	4.2	NaN	4.2	NaN	NaN	NaN	NaN	NaN	NaN	NaN	NaN	NaN	NaN	7.3	4.9	5.1	4.9	NaN	NaN	NaN	4.6	5.9	4	5.2	NaN	NaN	NaN	NaN	NaN	4.9	NaN	5.4	5	NaN	NaN	NaN	NaN	NaN	NaN	NaN
6.2	NaN	5.1	5.1	5	5.9	5.7	5.8	NaN	NaN	5.9	5.1	NaN	NaN	5.1	5.2	5.2	NaN	5.5	NaN	7.2	5.9	5.8	5.3	NaN	NaN	NaN	5.1	5.8	NaN	5.1	5.1	5.6	5.2	5.1	5.2	5.1	5.2	5.2	5.9	5	6.1	NaN	5.1	NaN	5.7	5.5	5.8	5.4	5.8
NaN	NaN	5.5	5.4	5.3	NaN	NaN	NaN	NaN	NaN	NaN	5.2	NaN	NaN	5.1	5.7	5.5	NaN	5.1	NaN	5	6.3	5.1	5	NaN	NaN	NaN	5.1	5.8	NaN	5.2	5.3	NaN	5.2	5.1	5.5	5.4	5.2	5.8	NaN	5	5.5	NaN	5.2	5.6	NaN	5.5	NaN	5.4	NaN
NaN	NaN	5.1	5.1	5	NaN	5.7	NaN	NaN	NaN	NaN	5.2	NaN	NaN	5.1	5.2	5.2	NaN	5.1	4	5	NaN	5.1	5	NaN	NaN	NaN	5.1	5.8	NaN	5.3	6.8	5.6	5.2	5.1	5.2	5.1	5.2	5.2	NaN	5	5.3	NaN	5.1	5.4	5.7	5.5	NaN	5.4	5.8
NaN	NaN	NaN	NaN	NaN	NaN	NaN	NaN	NaN	NaN	NaN	NaN	NaN	NaN	NaN	NaN	NaN	NaN	NaN	4	NaN	5.4	NaN	NaN	NaN	NaN	NaN	NaN	NaN	NaN	NaN	NaN	NaN	NaN	NaN	NaN	NaN	NaN	NaN	NaN	NaN	NaN	NaN	NaN	NaN	NaN	NaN	NaN	NaN	NaN
NaN	NaN	5.1	5.1	5	NaN	NaN	5.8	NaN	NaN	NaN	NaN	NaN	NaN	NaN	NaN	NaN	NaN	5.1	NaN	5	NaN	5.1	5	NaN	NaN	NaN	5.1	5	5.4	NaN	NaN	5.6	NaN	5.1	NaN	NaN	NaN	5.2	5.9	NaN	5.2	NaN	NaN	NaN	5.7	5.5	5.8	5.4	NaN
NaN	NaN	5.1	5.1	5	NaN	5.7	NaN	NaN	NaN	NaN	5.3	NaN	NaN	5.1	5.2	5.2	NaN	5.1	NaN	5	5.6	5.1	5	NaN	NaN	NaN	5.1	NaN	NaN	5.1	5	5.6	5.2	5.1	5.2	5.1	5.2	5.2	NaN	5	5.2	NaN	5.1	NaN	NaN	5.5	NaN	NaN	NaN
6.2	NaN	5.1	5.1	5.3	5.9	5.7	5.8	NaN	NaN	5.9	5.3	NaN	NaN	5.1	5.2	5.2	NaN	5.1	NaN	5	5.9	5.1	5	NaN	NaN	NaN	5.1	5.8	NaN	7.1	8.4	5.6	6	7	5.6	6.3	5.2	5.2	5.9	5	7.2	NaN	5.1	5.4	5.7	5.5	5.8	5.4	5.8
NaN	NaN	4.7	4.7	4.6	NaN	NaN	NaN	NaN	NaN	NaN	NaN	NaN	NaN	NaN	NaN	NaN	NaN	4.7	NaN	4.6	NaN	4.7	NaN	NaN	NaN	NaN	4.7	4.6	NaN	NaN	NaN	NaN	NaN	NaN	NaN	NaN	NaN	4.8	NaN	NaN	NaN	NaN	NaN	NaN	NaN	4.7	NaN	NaN	NaN
NaN	NaN	NaN	NaN	NaN	NaN	NaN	NaN	NaN	NaN	NaN	NaN	NaN	NaN	NaN	NaN	NaN	NaN	NaN	NaN	NaN	NaN	NaN	NaN	NaN	NaN	NaN	NaN	NaN	NaN	NaN	NaN	NaN	NaN	NaN	NaN	NaN	NaN	NaN	NaN	NaN	NaN	NaN	NaN	NaN	NaN	NaN	NaN	NaN	NaN
NaN	NaN	6.3	6	5.6	5.9	6.6	5.8	NaN	NaN	5.9	5.5	NaN	NaN	5.1	5.7	5.5	NaN	5.1	NaN	5.4	5.9	5.9	6	5.8	NaN	NaN	5.1	5.8	NaN	5.5	6.1	5.6	5.2	5.1	5.2	5.3	5.2	5.2	6.2	5	5.2	NaN	5.8	NaN	5.7	5.5	6	NaN	5.8
NaN	NaN	6.8	7.1	6.6	NaN	6.4	5.8	NaN	NaN	5.9	5.5	NaN	NaN	5.8	6.2	6.1	NaN	5.1	NaN	5.7	6.6	6.5	6.5	NaN	NaN	NaN	5.1	5.8	NaN	6	6.3	5.6	5.2	5.1	5.9	5.7	6.5	5.3	6	5	5.8	NaN	6.4	7.1	5.7	5.5	5.8	5.4	5.8
NaN	NaN	NaN	NaN	NaN	NaN	NaN	NaN	NaN	NaN	NaN	NaN	NaN	NaN	NaN	NaN	NaN	NaN	NaN	NaN	NaN	NaN	NaN	NaN	NaN	NaN	NaN	NaN	NaN	NaN	NaN	4.3	NaN	4	NaN	NaN	NaN	NaN	NaN	NaN	NaN	NaN	NaN	NaN	NaN	NaN	NaN	NaN	NaN	NaN
NaN	5.4	NaN	NaN	NaN	5.2	NaN	NaN	NaN	NaN	5.2	NaN	NaN	5.4	NaN	NaN	NaN	NaN	NaN	NaN	NaN	NaN	NaN	NaN	5.4	5.4	NaN	6.4	NaN	NaN	5.4	5.6	NaN	5.4	NaN	NaN	NaN	NaN	NaN	5.3	NaN	NaN	NaN	NaN	NaN	NaN	NaN	NaN	NaN	NaN
6.2	NaN	5.1	5.1	5	NaN	5.7	5.8	NaN	NaN	5.9	5.2	NaN	NaN	5.1	5.2	5.2	NaN	5.2	NaN	5	5.9	5.1	5.4	NaN	NaN	NaN	5.1	5.8	NaN	5.3	5.1	5.6	5.2	5.1	5.2	5.1	5.2	5.2	5.9	5	5.2	NaN	5.1	5.4	5.7	5.5	5.8	5.4	5.8
NaN	NaN	5.1	NaN	5	NaN	NaN	NaN	NaN	NaN	NaN	NaN	NaN	NaN	5.1	NaN	NaN	NaN	5.1	NaN	5	NaN	5.1	5.1	NaN	NaN	NaN	5.1	NaN	NaN	5.1	5.9	NaN	NaN	NaN	NaN	NaN	NaN	NaN	NaN	5	NaN	NaN	NaN	NaN	NaN	NaN	NaN	NaN	NaN
7.1	6.9	NaN	NaN	NaN	7	NaN	NaN	NaN	NaN	6.8	NaN	7.3	7.4	NaN	NaN	NaN	NaN	NaN	NaN	NaN	NaN	NaN	7.4	6.7	7.3	7.7	7.5	NaN	NaN	7.1	8.1	6.9	6.9	NaN	NaN	NaN	NaN	NaN	7	NaN	7.6	7.8	NaN	NaN	NaN	NaN	NaN	NaN	NaN
6.2	NaN	5.1	5.1	5	5.9	5.7	5.8	NaN	NaN	5.9	5.3	NaN	NaN	5.6	5.6	5.3	NaN	5.4	NaN	5	7	5.1	5	NaN	NaN	NaN	5.1	5.8	NaN	6.9	7.6	5.6	5.2	5.8	7.7	6.2	5.9	NaN	7.4	5	8.2	NaN	6.5	NaN	5.7	5.5	5.8	5.4	5.8
6.2	NaN	5.1	5.1	5	5.9	5.7	5.8	NaN	NaN	5.9	5.9	NaN	NaN	5.6	5.9	5.8	NaN	5.2	NaN	5	7.3	5.1	5	5.8	NaN	NaN	5.1	5.8	NaN	6.7	7.6	5.6	5.3	5.6	5.6	6.4	5.4	7.7	7.6	5	7.7	NaN	5.9	NaN	5.7	5.5	5.8	NaN	5.8
NaN	5.4	NaN	NaN	NaN	5.2	NaN	NaN	NaN	NaN	5.2	NaN	NaN	5.4	NaN	NaN	NaN	NaN	NaN	NaN	NaN	NaN	NaN	NaN	5.4	NaN	NaN	NaN	NaN	NaN	NaN	NaN	NaN	NaN	NaN	NaN	NaN	NaN	NaN	5.3	NaN	NaN	NaN	NaN	NaN	NaN	NaN	NaN	NaN	NaN
NaN	NaN	5.1	5.1	5	NaN	6.1	NaN	NaN	NaN	NaN	5.2	NaN	NaN	5.1	5.2	5.2	NaN	5.1	4	5	NaN	5.1	5	NaN	NaN	NaN	5.1	5.3	5.4	5.1	5.6	NaN	5.2	5.2	5.2	5.1	5.2	6.5	NaN	5	5.5	NaN	5.1	5.4	NaN	5.5	NaN	5.4	NaN
5.6	6.2	NaN	NaN	NaN	5.8	NaN	NaN	NaN	NaN	6.2	NaN	5.6	5.4	NaN	NaN	NaN	NaN	NaN	NaN	NaN	NaN	NaN	6.6	5.4	5.4	6.7	7.5	NaN	NaN	6.5	7.2	5.6	7.9	NaN	NaN	NaN	NaN	NaN	6.1	NaN	7.1	6.5	NaN	NaN	NaN	NaN	NaN	NaN	NaN
NaN	NaN	NaN	NaN	NaN	6.7	NaN	NaN	NaN	NaN	NaN	NaN	NaN	NaN	NaN	NaN	NaN	NaN	NaN	5.7	NaN	NaN	NaN	NaN	NaN	NaN	NaN	NaN	NaN	NaN	NaN	NaN	NaN	NaN	NaN	NaN	NaN	NaN	NaN	NaN	NaN	NaN	NaN	NaN	NaN	NaN	NaN	NaN	NaN	NaN
5.5	5.4	NaN	NaN	NaN	5.2	NaN	NaN	NaN	NaN	5.2	NaN	5.6	5.3	NaN	NaN	NaN	5.6	NaN	NaN	NaN	5.4	NaN	7.3	6.9	6.7	8	5.5	NaN	NaN	5.5	6.4	5.8	5.4	NaN	NaN	NaN	NaN	NaN	5.3	NaN	5.8	6.6	NaN	NaN	NaN	NaN	NaN	NaN	NaN
NaN	NaN	5.4	5.2	5	NaN	NaN	6	NaN	NaN	NaN	5.4	NaN	NaN	NaN	NaN	NaN	NaN	5.4	NaN	5.6	NaN	5.3	5	NaN	NaN	NaN	5.1	5	5.9	NaN	NaN	NaN	NaN	5.1	NaN	NaN	NaN	5.2	6.5	NaN	5.2	NaN	NaN	NaN	NaN	NaN	NaN	5.8	NaN
5.6	5.8	5.1	5.1	5	5.2	NaN	5.8	NaN	NaN	5.2	5.1	5.6	5.3	NaN	NaN	NaN	5.6	5.1	NaN	5	NaN	5.1	5.2	5.4	5.4	5.8	5.2	5	5.4	5.4	6.4	6.7	5.4	5.1	NaN	NaN	NaN	5.2	5.5	NaN	5.5	5.6	NaN	NaN	5.7	5.1	5.8	5.4	NaN
5.6	5.4	5.1	5.1	5	5.2	NaN	5.8	NaN	NaN	5.2	5.1	5.6	5.3	NaN	NaN	NaN	5.6	NaN	NaN	5	NaN	5.1	5.2	5.4	5.4	5.8	5.2	5	5.4	5.4	5.6	5.6	5.4	5.1	NaN	NaN	NaN	5.2	5.5	NaN	5.5	5.6	NaN	NaN	5.7	5.5	5.8	5.4	NaN
NaN	7.1	5.1	5.1	5	5.3	5.7	NaN	NaN	NaN	NaN	5.2	5.6	5.3	5.1	5.2	5.2	5.6	5.1	NaN	5.2	5.9	5.1	5.1	5.4	5.4	5.8	5.2	5.3	5.4	5.5	5.6	8.2	5.3	5.1	5.2	5.1	5.2	5.2	5.6	5	5.4	5.6	5.1	5.4	6	8.4	6.8	7.4	5.8
NaN	NaN	NaN	NaN	NaN	NaN	NaN	NaN	NaN	NaN	NaN	NaN	4	NaN	NaN	NaN	NaN	NaN	NaN	4	NaN	NaN	NaN	5.3	NaN	5.4	4.2	NaN	NaN	NaN	NaN	5.4	4	NaN	NaN	NaN	NaN	NaN	NaN	5	NaN	4.2	4.5	NaN	NaN	NaN	NaN	NaN	NaN	NaN
7.5	6.7	NaN	NaN	NaN	5.8	6.6	NaN	NaN	NaN	5.9	NaN	5.6	5.2	NaN	NaN	NaN	NaN	NaN	NaN	NaN	NaN	NaN	5.5	5.4	5.4	5.8	5.5	NaN	NaN	5.7	5.9	5.6	5.4	NaN	NaN	NaN	NaN	NaN	5.3	NaN	6	5.9	NaN	NaN	NaN	NaN	NaN	NaN	NaN
8.5	5.4	5.1	5.1	5	5.7	6.8	6.3	NaN	NaN	5.2	5.2	5.6	5.2	5.1	5.3	5.2	NaN	5.1	NaN	5	5.9	5.1	5.2	5.4	5.7	5.8	5.2	5.4	5.4	5.4	5.7	7.1	5.3	5.1	5.2	5.1	NaN	5.5	5.5	5.2	5.5	5.9	NaN	5.4	5.7	5.5	5.8	5.4	NaN
6.5	5.4	5.3	5.1	5.2	5.8	7.8	7.2	NaN	NaN	5.4	5.9	5.7	6.8	5.9	7.6	7.4	6.2	5.1	4	5	5.9	5.1	5.5	7.7	5.4	5.8	5.9	7.5	5.4	5.6	6	8.6	5.5	7	6	6.2	6.3	5.3	6.7	5.4	5.7	5.7	5.1	5.4	5.7	5.5	5.8	5.4	7.2
6.2	NaN	5.1	5.1	5	5.2	NaN	5.8	NaN	NaN	5.9	5.3	NaN	NaN	5.1	5.2	5.2	NaN	5.1	NaN	5	5.9	5.2	5	NaN	NaN	NaN	5.1	5.8	NaN	5.1	5	5.6	5.2	5.1	5.2	5.1	5.2	5.2	5.9	5	5.2	NaN	5.1	NaN	5.7	5.5	NaN	5.4	5.8
NaN	NaN	5.1	5.1	5	NaN	NaN	5.8	NaN	NaN	5.9	5.3	NaN	NaN	5.1	5.2	5.2	NaN	5.1	NaN	5	5.9	5.1	5	NaN	NaN	NaN	5.1	5.8	NaN	5.1	5.8	5.6	5.2	5.1	5.2	5.1	5.2	5.2	5.9	5	5.2	NaN	5.1	NaN	5.7	5.5	NaN	5.4	5.8
6.2	NaN	5.1	5.1	5	5.9	5.7	5.8	NaN	NaN	5.9	5.3	NaN	NaN	5.1	5.2	5.2	NaN	5.1	NaN	5	5.9	5.1	5	NaN	NaN	NaN	5.1	5.8	NaN	5.1	5.4	5.6	5.2	5.1	7.4	5.1	5.2	7.2	6.6	5	5.8	NaN	5.1	NaN	5.7	5.5	5.8	5.4	5.8
NaN	NaN	NaN	NaN	NaN	NaN	NaN	NaN	NaN	NaN	NaN	NaN	NaN	NaN	NaN	NaN	NaN	NaN	NaN	NaN	NaN	NaN	NaN	NaN	NaN	NaN	NaN	NaN	NaN	NaN	NaN	NaN	NaN	NaN	NaN	NaN	NaN	NaN	NaN	NaN	NaN	NaN	NaN	NaN	NaN	NaN	NaN	NaN	NaN	NaN
NaN	NaN	NaN	NaN	NaN	NaN	NaN	NaN	NaN	NaN	NaN	NaN	NaN	NaN	NaN	NaN	NaN	NaN	NaN	NaN	NaN	NaN	NaN	NaN	NaN	NaN	NaN	NaN	NaN	NaN	NaN	NaN	NaN	NaN	NaN	NaN	NaN	NaN	NaN	NaN	NaN	NaN	NaN	NaN	NaN	NaN	NaN	NaN	NaN	NaN
NaN	NaN	NaN	NaN	NaN	NaN	NaN	NaN	NaN	NaN	NaN	NaN	NaN	NaN	NaN	NaN	NaN	NaN	NaN	NaN	NaN	NaN	NaN	NaN	NaN	NaN	NaN	NaN	NaN	NaN	NaN	NaN	NaN	NaN	NaN	NaN	NaN	NaN	NaN	NaN	NaN	NaN	NaN	NaN	NaN	NaN	NaN	NaN	NaN	NaN
NaN	NaN	5.1	5.1	5	NaN	NaN	NaN	NaN	5.1	NaN	5.5	NaN	NaN	5.1	5.2	5.2	NaN	5.1	NaN	5	NaN	6.1	5	NaN	NaN	NaN	5.1	NaN	NaN	5.1	6.1	NaN	5.2	5.2	5.2	5.1	5.2	6.4	NaN	5	6.2	NaN	5.1	NaN	NaN	NaN	NaN	5.4	NaN
NaN	NaN	5.1	5.1	5	5.9	5.7	5.8	NaN	NaN	5.9	5.2	NaN	NaN	5.1	5.2	5.2	NaN	5.1	NaN	5	7.1	5.1	5	NaN	NaN	NaN	5.1	5.3	5.4	5.3	6.2	5.6	5.2	5.1	5.2	5.1	5.2	5.8	5.9	5	6.4	NaN	5.1	5.4	5.7	5.1	5.8	5.4	5.8
6.3	NaN	5.1	5.1	5	NaN	5.7	5.8	NaN	NaN	5.9	5.3	NaN	NaN	5.1	5.2	5.2	NaN	5.1	NaN	5	5.9	5.1	5	NaN	NaN	NaN	5.1	5.8	NaN	5.1	5	5.6	5.2	5.8	5.2	5.1	5.2	5.2	5.9	5	5.2	NaN	5.1	5.4	7.7	5.5	6.4	5.4	5.8
NaN	NaN	5.1	5.1	5	5.9	5.7	5.8	NaN	NaN	5.9	5.2	NaN	NaN	5.1	5.2	5.2	NaN	5.1	NaN	5.4	5.9	5.1	5	NaN	NaN	NaN	5.1	5.3	5.4	5.1	5	5.6	5.2	5.1	5.2	5.1	5.2	5.2	5.9	5	5.2	NaN	5.1	5.4	5.7	5.5	5.8	5.4	5.8
NaN	NaN	5.1	5.2	5	NaN	5.8	NaN	NaN	NaN	NaN	5.3	NaN	NaN	5.1	6.1	5.6	NaN	5.1	NaN	5	6.7	5.1	5.3	NaN	NaN	NaN	5.1	NaN	NaN	5.2	6.2	5.6	5.2	5.1	5.9	5.7	5.8	5.8	NaN	5	5.7	NaN	5.1	6.4	5.7	5.5	NaN	5.4	NaN
5.6	5.4	NaN	NaN	NaN	5.6	NaN	NaN	NaN	NaN	5.9	NaN	5.6	5.4	NaN	NaN	NaN	NaN	NaN	NaN	NaN	NaN	NaN	5.7	5.4	6	6.1	7.3	NaN	NaN	5.4	6.1	5.6	5.4	NaN	NaN	NaN	NaN	NaN	5.3	NaN	6	5.6	NaN	NaN	NaN	NaN	NaN	NaN	NaN
NaN	NaN	NaN	NaN	NaN	NaN	NaN	NaN	NaN	NaN	NaN	NaN	NaN	NaN	NaN	NaN	NaN	NaN	NaN	NaN	NaN	NaN	NaN	NaN	NaN	NaN	NaN	NaN	NaN	NaN	NaN	NaN	NaN	NaN	NaN	NaN	NaN	NaN	NaN	NaN	NaN	NaN	NaN	NaN	NaN	NaN	NaN	NaN	NaN	NaN
NaN	NaN	4.1	4.1	4	4.4	NaN	NaN	NaN	NaN	NaN	NaN	4.2	NaN	NaN	NaN	NaN	NaN	NaN	NaN	NaN	NaN	NaN	4.4	NaN	4.7	4.2	4.2	NaN	NaN	NaN	4.7	4.2	4.2	NaN	NaN	NaN	NaN	NaN	4.5	NaN	4.2	4.3	NaN	NaN	4.7	NaN	4.8	NaN	NaN
NaN	NaN	NaN	NaN	NaN	NaN	5.7	NaN	NaN	NaN	NaN	NaN	NaN	NaN	NaN	NaN	NaN	NaN	5.3	NaN	NaN	NaN	NaN	5.5	NaN	NaN	NaN	NaN	NaN	NaN	5.5	5.3	NaN	NaN	NaN	NaN	NaN	NaN	NaN	NaN	NaN	NaN	NaN	NaN	NaN	NaN	NaN	NaN	NaN	NaN
7.1	NaN	5.1	5.1	5	5.9	5.7	7.4	NaN	NaN	5.9	5.3	NaN	NaN	5.1	5.2	5.2	NaN	5.1	NaN	5	5.9	5.1	5	5.8	NaN	NaN	5.1	5.8	NaN	5.1	5.4	5.6	5.2	5.1	5.2	5.1	5.2	5.2	5.9	5	5.2	NaN	5.1	NaN	5.7	5.5	5.8	NaN	5.8
NaN	NaN	NaN	5.1	5	NaN	NaN	NaN	NaN	NaN	NaN	5.1	NaN	NaN	NaN	NaN	NaN	NaN	5.1	NaN	6.1	NaN	5.1	5	NaN	NaN	NaN	5.1	5	NaN	NaN	NaN	NaN	NaN	NaN	NaN	NaN	NaN	NaN	NaN	NaN	NaN	NaN	NaN	NaN	NaN	NaN	NaN	NaN	NaN
NaN	NaN	5.1	5.1	5	NaN	NaN	NaN	NaN	NaN	NaN	5.1	NaN	NaN	NaN	NaN	NaN	NaN	5.1	NaN	5	NaN	5.1	5	NaN	NaN	NaN	5.1	5	NaN	NaN	NaN	NaN	NaN	5.1	NaN	NaN	NaN	6.1	NaN	NaN	5.3	NaN	NaN	NaN	NaN	NaN	NaN	NaN	NaN
5.9	5.4	NaN	NaN	NaN	5.2	NaN	NaN	NaN	NaN	5.2	NaN	5.6	5.1	NaN	NaN	NaN	NaN	NaN	NaN	NaN	NaN	NaN	5.5	6	6.6	NaN	NaN	NaN	NaN	5.4	6.1	5.6	5.6	NaN	NaN	NaN	NaN	NaN	5.3	NaN	NaN	5.6	NaN	NaN	NaN	NaN	NaN	NaN	NaN
6.2	NaN	5.1	5.1	5	NaN	NaN	5.8	NaN	NaN	NaN	5.1	NaN	NaN	NaN	NaN	NaN	NaN	5.1	NaN	5	NaN	5.1	5	NaN	NaN	NaN	5.1	5	5.4	NaN	NaN	5.6	NaN	5.1	NaN	NaN	NaN	5.2	5.9	NaN	5.2	NaN	NaN	NaN	5.7	5.1	5.8	5.4	NaN
NaN	NaN	5.1	5.1	5	NaN	5.7	NaN	NaN	NaN	NaN	5.2	NaN	NaN	5.5	5.2	5.4	NaN	5.1	NaN	5.2	NaN	5.3	5	NaN	NaN	NaN	5.1	5.3	5.4	5.8	6.3	6.7	5.2	5.1	5.2	5.1	5.2	5.2	NaN	5	5.6	NaN	5.1	5.4	NaN	5.6	NaN	5.4	NaN
NaN	NaN	5.1	5.1	5	NaN	NaN	NaN	NaN	NaN	NaN	5.2	NaN	NaN	5.1	5.2	5.2	NaN	5.1	NaN	5	NaN	5.1	5	NaN	NaN	NaN	5.1	NaN	NaN	5.3	6.2	NaN	5.2	5.6	5.2	5.1	5.2	6.4	NaN	5	5.7	NaN	5.1	5.4	NaN	NaN	NaN	NaN	NaN
4.1	NaN	NaN	NaN	NaN	NaN	NaN	NaN	NaN	NaN	NaN	NaN	NaN	NaN	NaN	NaN	NaN	NaN	NaN	NaN	NaN	NaN	NaN	NaN	NaN	NaN	NaN	NaN	NaN	NaN	NaN	NaN	NaN	NaN	NaN	NaN	NaN	NaN	NaN	NaN	NaN	NaN	NaN	NaN	NaN	NaN	NaN	NaN	NaN	NaN
4.7	NaN	NaN	NaN	NaN	4.4	NaN	NaN	NaN	NaN	NaN	NaN	4.6	4.2	NaN	NaN	NaN	NaN	NaN	NaN	NaN	NaN	NaN	5.1	4.4	5	5.1	5.1	NaN	NaN	4.3	5.8	4.9	5.1	NaN	NaN	NaN	NaN	NaN	4.8	NaN	5.4	5.5	NaN	NaN	NaN	NaN	NaN	NaN	NaN
NaN	NaN	5.1	5.1	5	5.9	5.7	5.8	NaN	NaN	5.9	5.3	NaN	NaN	5.1	5.2	5.2	NaN	5.1	NaN	5	5.9	5.1	5	NaN	NaN	NaN	5.1	5.8	NaN	5.1	5.1	5.6	5.2	5.1	5.2	5.1	5.2	6	6.3	5	5.2	NaN	5.1	5.4	5.7	5.5	5.8	5.4	5.8
NaN	NaN	5.4	5.4	5.1	NaN	5.7	NaN	NaN	NaN	NaN	5.2	NaN	NaN	5.1	5.9	5.4	NaN	5.1	NaN	5	6.4	5.1	5	NaN	NaN	NaN	5.1	NaN	NaN	5.2	5.2	5.6	5.2	5.1	5.3	5.5	5.6	5.8	NaN	5	5.8	NaN	5.4	5.5	5.7	5.5	NaN	5.4	5.8
NaN	NaN	5.1	5.2	5	NaN	NaN	NaN	NaN	NaN	NaN	5.2	NaN	NaN	5.1	5.2	5.2	NaN	5.1	NaN	5.2	6.1	5.3	5.1	NaN	NaN	NaN	5.1	NaN	NaN	5.1	5.7	NaN	5.2	5.1	5.5	5.5	5.8	5.9	NaN	5	5.6	NaN	5.2	5.5	NaN	NaN	NaN	5.4	NaN
6.7	7.3	NaN	NaN	NaN	6	NaN	NaN	NaN	NaN	5.4	NaN	5.6	5.4	NaN	NaN	NaN	NaN	NaN	NaN	NaN	NaN	NaN	5.9	5.4	5.5	6.2	5.5	NaN	NaN	5.4	6.1	6	5.4	NaN	NaN	NaN	NaN	NaN	5.3	NaN	5.7	5.6	NaN	NaN	NaN	NaN	NaN	NaN	NaN
NaN	5.4	NaN	NaN	NaN	5.2	NaN	NaN	NaN	NaN	5.2	NaN	5.6	5.1	NaN	NaN	NaN	NaN	NaN	NaN	NaN	NaN	NaN	NaN	5.4	5.4	5.8	NaN	NaN	NaN	5.4	5.6	5.6	7	NaN	NaN	NaN	NaN	NaN	5.3	NaN	5.7	5.6	NaN	NaN	NaN	NaN	NaN	NaN	NaN
NaN	NaN	NaN	NaN	NaN	NaN	NaN	NaN	NaN	NaN	NaN	NaN	NaN	NaN	NaN	NaN	NaN	NaN	NaN	NaN	NaN	NaN	NaN	NaN	NaN	NaN	NaN	NaN	NaN	NaN	NaN	NaN	NaN	NaN	NaN	NaN	NaN	NaN	NaN	NaN	NaN	NaN	NaN	NaN	NaN	NaN	NaN	NaN	NaN	NaN
5.6	5.4	NaN	NaN	NaN	5.2	NaN	NaN	NaN	NaN	5.2	NaN	5.6	5.4	NaN	NaN	NaN	NaN	NaN	NaN	NaN	NaN	NaN	7.2	5.4	6.2	6.2	6.4	NaN	NaN	6.4	7.7	5.6	5.7	NaN	NaN	NaN	NaN	NaN	6.6	NaN	7.5	7.8	NaN	NaN	NaN	NaN	NaN	NaN	NaN
5.6	5.4	NaN	NaN	NaN	5.5	NaN	NaN	NaN	NaN	5.3	NaN	6.1	5.5	NaN	NaN	NaN	NaN	NaN	NaN	NaN	NaN	NaN	5.8	5.7	5.7	6.4	7.3	NaN	NaN	5.4	7.3	5.6	5.4	NaN	NaN	NaN	NaN	NaN	5.3	NaN	6.2	6.3	NaN	NaN	NaN	NaN	NaN	NaN	NaN
6.2	NaN	6	6	5.2	5.9	6	5.8	NaN	NaN	6.2	5.3	NaN	NaN	5.4	6.1	5.9	NaN	5.1	NaN	5	6.5	5.1	5	NaN	NaN	NaN	5.1	5.8	NaN	5.2	5.7	5.6	5.2	5.1	5.8	5.3	6	6.3	5.9	5	5.2	NaN	5.1	5.6	5.7	5.5	5.8	5.4	5.8
5.8	7.2	5.1	5.1	5	5.4	5.7	5.9	NaN	NaN	5.2	5.4	5.6	5.4	5.1	5.7	5.2	NaN	7.5	5	6.7	6.4	7.5	7.9	5.4	6.1	7.9	5.8	7.7	5.4	5.2	5.9	6	5.2	5.1	5.7	5.4	NaN	6.4	5.5	5	5.4	5.6	NaN	5.4	6	5.1	5.8	5.4	NaN
NaN	NaN	5.2	5.1	5.1	NaN	NaN	NaN	NaN	NaN	NaN	5.2	NaN	NaN	5.1	5.3	5.2	NaN	5.1	NaN	5	6.3	5.5	5	NaN	NaN	NaN	5.1	5.3	NaN	5.2	5.8	NaN	5.2	5.1	5.3	5.1	5.5	5.4	NaN	5	5.2	NaN	5.5	5.4	NaN	5.1	NaN	NaN	NaN
NaN	NaN	5.1	5.1	5	NaN	NaN	NaN	NaN	NaN	NaN	5.2	NaN	NaN	5.1	5.2	5.2	NaN	5.1	4	6.6	NaN	5.4	5	NaN	NaN	NaN	5.1	5.3	5.4	5.1	5.9	5.6	5.2	5.1	5.2	5.1	5.2	5.2	NaN	5	5.2	NaN	5.1	5.4	NaN	5.5	NaN	5.4	NaN
NaN	NaN	5.1	5.1	5	NaN	NaN	NaN	NaN	NaN	NaN	NaN	NaN	NaN	5.1	5.2	5.2	NaN	5.1	NaN	5	NaN	5.5	5	NaN	NaN	NaN	5.1	NaN	NaN	5.1	6	NaN	5.2	5.1	5.2	5.1	5.5	5.2	NaN	6.2	5.2	NaN	5.1	NaN	NaN	NaN	NaN	NaN	NaN
NaN	NaN	NaN	NaN	5	NaN	NaN	NaN	NaN	NaN	NaN	NaN	NaN	NaN	NaN	NaN	NaN	NaN	5.1	NaN	5	NaN	NaN	5	NaN	NaN	NaN	5.1	5	NaN	NaN	NaN	NaN	NaN	NaN	NaN	NaN	NaN	NaN	NaN	NaN	NaN	NaN	NaN	NaN	NaN	NaN	NaN	NaN	NaN
5.6	5.4	NaN	NaN	NaN	5.2	NaN	NaN	NaN	NaN	5.2	NaN	5.6	5.4	NaN	NaN	NaN	NaN	NaN	NaN	NaN	NaN	NaN	5.5	5.4	5.4	5.8	5.8	NaN	NaN	5.4	5.6	5.6	5.4	NaN	NaN	NaN	NaN	NaN	6.3	NaN	5.7	5.6	NaN	NaN	NaN	NaN	NaN	NaN	NaN
NaN	NaN	5.1	4.7	5	NaN	NaN	5.4	NaN	NaN	NaN	NaN	NaN	NaN	NaN	NaN	NaN	NaN	5	NaN	5.9	NaN	4.9	NaN	NaN	NaN	NaN	4.7	4.6	NaN	NaN	NaN	NaN	NaN	NaN	NaN	NaN	NaN	4.8	NaN	NaN	NaN	NaN	NaN	NaN	NaN	4.7	NaN	6	NaN
NaN	NaN	5.1	5.1	5	NaN	5.7	5.8	NaN	NaN	5.9	5.2	NaN	NaN	5.1	5.2	5.2	NaN	5.1	NaN	5	5.9	5.1	5	NaN	NaN	NaN	5.1	5.9	NaN	5.1	5.3	5.6	5.2	5.1	5.2	5.1	5.2	5.2	5.9	5	5.2	NaN	5.1	5.4	7	5.5	6.5	6.4	5.8
NaN	NaN	5.4	5.4	5.3	NaN	NaN	NaN	NaN	NaN	NaN	5.4	NaN	NaN	5.1	5.2	5.2	NaN	5.1	NaN	5	NaN	5.8	5.2	NaN	NaN	NaN	5.1	6	NaN	5.1	5.6	NaN	5.2	5.1	5.3	5.2	5.9	5.9	NaN	5	6	NaN	6	5.4	NaN	5.5	NaN	5.4	NaN
NaN	NaN	5.1	5.1	5	NaN	NaN	NaN	NaN	NaN	NaN	5.3	NaN	NaN	5.1	5.2	5.2	NaN	5.1	NaN	5	NaN	5.1	5	NaN	NaN	NaN	5.1	NaN	NaN	5.1	5	NaN	5.2	5.1	5.2	5.1	5.2	5.2	NaN	5	5.2	NaN	5.1	5.4	NaN	5.5	NaN	5.4	NaN
NaN	NaN	NaN	NaN	NaN	NaN	NaN	NaN	NaN	NaN	NaN	NaN	NaN	NaN	NaN	NaN	NaN	NaN	NaN	NaN	NaN	NaN	NaN	NaN	NaN	6.2	5.9	NaN	NaN	NaN	NaN	NaN	NaN	NaN	NaN	NaN	NaN	NaN	NaN	NaN	NaN	NaN	NaN	NaN	NaN	NaN	NaN	NaN	NaN	NaN
NaN	NaN	NaN	NaN	NaN	NaN	NaN	NaN	NaN	NaN	NaN	NaN	NaN	NaN	5.4	NaN	NaN	NaN	NaN	NaN	NaN	NaN	NaN	NaN	NaN	NaN	NaN	NaN	NaN	NaN	NaN	NaN	NaN	NaN	NaN	NaN	NaN	NaN	NaN	NaN	NaN	NaN	NaN	NaN	NaN	NaN	NaN	NaN	NaN	NaN
6.2	NaN	5.1	5.1	5	5.9	NaN	5.8	NaN	NaN	5.9	5.3	NaN	NaN	5.1	5.2	5.2	NaN	5.1	NaN	5	7.9	5.1	5	NaN	NaN	NaN	5.1	5.8	NaN	5.1	6.3	5.6	5.2	5.5	5.2	5.1	5.2	7	7.4	5	6.8	NaN	5.5	NaN	5.7	5.5	5.8	5.4	5.8
9.3	8.8	NaN	NaN	NaN	5.4	NaN	NaN	NaN	NaN	8	NaN	5.6	5.1	NaN	5.5	NaN	NaN	NaN	NaN	NaN	NaN	5.5	5.4	5.4	5.4	5.8	NaN	NaN	NaN	5.4	5.6	9.2	5.4	NaN	NaN	NaN	NaN	NaN	5.3	NaN	5.7	5.6	NaN	NaN	NaN	NaN	NaN	NaN	NaN
6.2	NaN	5.1	5.1	5	6.3	5.7	6.2	NaN	NaN	5.9	5.2	NaN	NaN	5.1	5.2	5.2	NaN	5.1	NaN	5	5.9	5.1	5	NaN	NaN	NaN	5.1	5.6	5.4	5.1	5.8	7.2	5.2	5.1	5.2	5.1	5.2	5.8	5.9	5	5.2	NaN	5.1	5.4	5.7	5.7	5.8	5.4	5.8
6.2	NaN	5.1	5.1	5	5.9	5.7	6	NaN	NaN	5.9	5.3	NaN	NaN	5.1	5.2	5.2	NaN	5.1	4.7	5	5.9	5.1	5	NaN	NaN	NaN	5.1	5.8	NaN	5.1	5	5.6	5.2	5.1	NaN	5.1	5.2	5.2	5.9	5	5.2	NaN	5.1	NaN	5.7	5.5	5.8	5.4	5.8
6.2	NaN	5.1	5.1	5	NaN	6	5.8	NaN	NaN	5.9	5.2	NaN	NaN	5.1	5.2	5.2	NaN	5.1	4	5	5.9	5.1	5	NaN	NaN	NaN	5.1	5.8	NaN	5.1	5	5.6	5.2	5.1	5.2	5.1	5.2	5.2	5.9	5	5.2	NaN	5.1	5.4	5.7	6.6	5.8	5.4	5.8
6.4	5.5	NaN	NaN	NaN	5.9	NaN	NaN	NaN	NaN	5.2	NaN	5.6	5.5	NaN	NaN	NaN	7.2	NaN	NaN	NaN	NaN	NaN	9.3	6.2	5.4	7.8	5.5	NaN	NaN	6.2	6.7	5.9	5.4	NaN	NaN	NaN	NaN	NaN	5.7	NaN	5.7	5.7	NaN	NaN	NaN	NaN	NaN	NaN	NaN
5.9	5.4	NaN	NaN	NaN	5.8	NaN	NaN	NaN	NaN	5.2	NaN	5.7	5.5	NaN	NaN	NaN	NaN	NaN	NaN	NaN	NaN	NaN	5.5	5.5	5.6	6.4	5.5	NaN	NaN	5.4	6.6	5.9	5.4	NaN	NaN	NaN	NaN	NaN	5.3	NaN	NaN	5.6	NaN	NaN	NaN	NaN	NaN	NaN	NaN
5.6	5.5	NaN	NaN	NaN	5.2	NaN	NaN	NaN	NaN	5.2	NaN	5.6	5.4	NaN	NaN	NaN	5.6	NaN	NaN	NaN	NaN	NaN	5.5	5.4	5.4	5.8	5.5	NaN	NaN	5.4	5.6	5.7	6	NaN	NaN	NaN	NaN	NaN	5.3	NaN	5.7	5.6	NaN	NaN	NaN	NaN	NaN	NaN	NaN
NaN	NaN	NaN	NaN	NaN	NaN	NaN	NaN	NaN	NaN	NaN	NaN	NaN	NaN	NaN	NaN	NaN	NaN	NaN	NaN	NaN	NaN	NaN	NaN	NaN	NaN	NaN	NaN	NaN	NaN	NaN	NaN	NaN	NaN	NaN	NaN	NaN	NaN	NaN	NaN	NaN	NaN	4.1	NaN	NaN	NaN	NaN	NaN	NaN	NaN
5.6	5.4	NaN	NaN	NaN	6.8	NaN	NaN	NaN	NaN	5.2	NaN	5.6	5.4	NaN	NaN	NaN	NaN	NaN	NaN	NaN	NaN	NaN	5.5	5.4	5.4	5.8	5.5	NaN	NaN	5.4	7.1	5.6	5.4	NaN	NaN	NaN	NaN	NaN	9	NaN	5.7	5.6	NaN	NaN	NaN	NaN	NaN	NaN	NaN
7.8	5.9	5.1	5.1	5	5.6	6.7	7.5	NaN	NaN	5.8	5.1	5.6	5.4	5.1	5.2	5.2	5.6	5.1	6.7	5	5.9	5.1	5.5	5.4	5.4	5.8	5.5	5.6	5.4	5.4	5.5	5.6	5.4	5.1	5.2	5.1	NaN	5.2	5.3	5	5.7	5.6	NaN	5.4	5.8	6.2	5.8	5.4	NaN
NaN	NaN	5.8	5.6	5.7	NaN	NaN	NaN	NaN	NaN	NaN	5.2	NaN	NaN	5.1	5.4	5.2	NaN	5.1	NaN	5.1	NaN	6	5	NaN	NaN	NaN	5.2	5.3	NaN	5.1	5	NaN	5.2	5.1	5.2	5.1	5.8	5.2	NaN	5.1	5.2	NaN	5.8	NaN	NaN	NaN	NaN	NaN	NaN
6.2	NaN	5.1	5.1	5	NaN	5.7	5.8	NaN	NaN	5.9	5.3	NaN	NaN	5.1	5.2	5.2	NaN	5.1	NaN	5	5.9	5.7	5.6	NaN	NaN	NaN	5.1	5.8	NaN	5.1	5	5.6	5.2	6.5	5.2	5.1	5.2	5.2	5.9	5	5.2	NaN	5.1	5.4	5.7	5.5	5.8	5.4	5.8
6.2	NaN	5.1	5.1	5	5.9	5.7	5.8	NaN	NaN	5.9	5.2	NaN	NaN	5.1	5.2	5.2	NaN	6.1	NaN	5	5.9	5.8	5.5	NaN	NaN	NaN	5.1	5.3	5.4	6.3	6.2	5.6	5.2	5.1	5.2	5.1	5.2	5.2	5.9	5	5.6	NaN	5.1	5.4	5.7	5.1	5.8	5.4	5.8
6.2	NaN	5.1	5.1	5	5.7	NaN	6.3	NaN	NaN	5.7	5.3	NaN	5.3	5.3	6	5.9	NaN	6.4	NaN	5	6.7	7	6.7	NaN	NaN	NaN	6	5.8	NaN	6.3	7.1	6.2	6.6	7.3	5.7	6.3	5.2	6.9	6.9	5	6.6	NaN	5.1	NaN	6	6.6	5.8	5.4	6.3
4.3	4.4	NaN	NaN	NaN	4.2	NaN	NaN	NaN	NaN	4.2	NaN	4.4	NaN	NaN	NaN	NaN	NaN	NaN	NaN	NaN	NaN	NaN	5.3	4.5	4.9	4.2	NaN	NaN	NaN	4.6	5.8	4.5	5	NaN	NaN	NaN	NaN	NaN	4.5	NaN	4.4	4.9	NaN	NaN	NaN	NaN	NaN	NaN	NaN
NaN	NaN	5.1	5.1	5	NaN	NaN	NaN	NaN	NaN	NaN	5.2	NaN	NaN	5.1	5.2	5.2	NaN	5.1	NaN	5	NaN	5.1	5	NaN	NaN	NaN	5.1	NaN	NaN	5.8	6.7	5.6	5.2	5.1	5.2	5.1	5.2	5.4	NaN	5	5.6	NaN	5.1	5.4	NaN	5.5	NaN	5.4	NaN
6.2	NaN	5.1	5.1	5	NaN	NaN	5.8	NaN	NaN	NaN	5.1	NaN	NaN	NaN	NaN	NaN	NaN	NaN	NaN	5	NaN	6.3	5	NaN	NaN	NaN	5.1	5	5.4	NaN	NaN	5.6	NaN	5.1	NaN	NaN	NaN	5.6	5.9	NaN	5.3	NaN	NaN	NaN	5.7	5.5	5.8	5.4	NaN
6.2	NaN	5.1	5.1	5	5.9	5.7	5.8	NaN	NaN	5.9	5.3	NaN	NaN	5.1	5.2	5.2	NaN	6.1	NaN	5	5.9	5.9	6	NaN	NaN	NaN	5.1	5.8	NaN	6.5	6.7	5.6	5.2	5.1	5.7	5.1	5.2	5.2	5.9	5	6.5	NaN	5.1	NaN	5.7	5.5	5.8	5.4	5.8
8.4	NaN	5.1	5.5	5.1	6.7	6.9	NaN	NaN	NaN	9.1	5.5	NaN	NaN	5.4	5.6	5.4	NaN	5.1	NaN	5.8	5.9	5.1	5	NaN	NaN	NaN	5.1	7.2	5.4	5.2	5.2	7.8	5.8	7.6	5.2	5.1	5.2	5.2	5.9	5.4	5.2	NaN	5.1	5.4	7.5	5.1	7.9	8.1	6.7
6.8	NaN	5.1	5.1	5	6.2	8.2	7.1	NaN	NaN	6.3	5.5	NaN	NaN	5.1	5.5	5.8	NaN	5.1	NaN	5	5.9	5.1	5	NaN	NaN	NaN	5.1	5.1	5.4	5.2	6.9	8.7	5.2	5.1	6	5.4	5.3	5.2	5.9	5	5.2	NaN	5.1	5.4	5.7	7	5.8	5.4	6
6.7	NaN	5.1	5.1	5	5.9	7.7	6.9	NaN	NaN	5.9	5.7	NaN	NaN	5.6	5.7	6.3	NaN	5.2	4	5	5.9	5.1	5	NaN	NaN	NaN	5.1	5.8	NaN	6	6	6.8	5.7	5.6	8.4	5.6	5.2	5.2	6	5	5.3	NaN	5.1	NaN	5.7	7.1	5.8	5.4	6.8
6.2	NaN	5.1	5.1	5	NaN	7.8	6.9	NaN	NaN	5.9	5.2	NaN	NaN	5.1	5.2	5.2	NaN	5.1	4	5	5.9	5.1	5	NaN	NaN	NaN	5.1	5.9	NaN	6	6.9	5.6	5.2	5.1	5.6	5.3	5.2	5.2	5.9	5	6.5	NaN	5.2	5.4	5.7	7.5	5.8	5.4	5.8
NaN	NaN	NaN	NaN	NaN	NaN	NaN	NaN	NaN	NaN	NaN	NaN	NaN	NaN	NaN	NaN	NaN	NaN	5.1	NaN	NaN	NaN	5.8	5.9	NaN	NaN	NaN	NaN	NaN	NaN	5.8	5.6	NaN	NaN	5.6	NaN	NaN	NaN	NaN	NaN	NaN	5.5	NaN	NaN	NaN	NaN	NaN	NaN	NaN	NaN
NaN	NaN	NaN	NaN	NaN	NaN	NaN	NaN	NaN	NaN	NaN	NaN	NaN	NaN	NaN	NaN	NaN	NaN	NaN	NaN	NaN	NaN	NaN	NaN	NaN	NaN	NaN	NaN	NaN	NaN	NaN	5.9	NaN	NaN	5.2	NaN	NaN	NaN	5.7	NaN	NaN	5.8	NaN	NaN	NaN	NaN	NaN	NaN	NaN	NaN
NaN	NaN	5.1	5.1	5	NaN	NaN	6.6	NaN	NaN	NaN	5.1	NaN	NaN	NaN	NaN	NaN	NaN	5.1	NaN	5	NaN	5.1	5	NaN	NaN	NaN	5.1	5	5.4	NaN	NaN	5.6	NaN	5.1	NaN	NaN	NaN	5.2	NaN	NaN	5.2	NaN	NaN	NaN	5.7	5.1	NaN	5.4	NaN
NaN	NaN	NaN	NaN	NaN	NaN	NaN	NaN	NaN	NaN	NaN	NaN	NaN	NaN	NaN	NaN	NaN	NaN	NaN	4	NaN	NaN	NaN	NaN	NaN	NaN	NaN	NaN	NaN	NaN	NaN	NaN	NaN	NaN	NaN	NaN	NaN	NaN	NaN	NaN	NaN	NaN	NaN	NaN	NaN	NaN	NaN	NaN	NaN	NaN
6.2	NaN	5.1	5.1	5	NaN	NaN	6.1	NaN	NaN	NaN	5.1	NaN	NaN	NaN	NaN	NaN	NaN	6.2	NaN	5	NaN	5.9	5.6	NaN	NaN	NaN	5.1	5	5.4	NaN	NaN	5.6	NaN	5.3	NaN	NaN	NaN	8.3	6.8	NaN	6.6	NaN	NaN	NaN	5.7	5.5	5.8	5.4	NaN
NaN	NaN	5.1	5.1	5	NaN	NaN	NaN	NaN	NaN	NaN	5.3	NaN	NaN	5.1	5.2	5.2	NaN	5.1	NaN	5	NaN	5.1	5	NaN	NaN	NaN	5.1	NaN	NaN	5.1	5.7	NaN	5.2	5.1	5.2	5.1	5.2	5.2	NaN	5	5.2	NaN	5.1	5.4	NaN	NaN	NaN	5.4	NaN
6.2	NaN	NaN	5.1	5	5.9	6.4	6.1	NaN	NaN	NaN	5.2	NaN	NaN	NaN	NaN	NaN	NaN	6.1	NaN	5	6.5	5.1	5	NaN	NaN	NaN	6.5	6.7	5.4	6.1	6.9	5.9	5.2	5.1	NaN	5.2	NaN	NaN	8.1	5	8.3	NaN	NaN	5.4	5.7	5.5	5.8	5.4	NaN
6.2	NaN	5.1	5.1	5	5.9	6.1	6	NaN	NaN	NaN	5.2	NaN	NaN	NaN	NaN	NaN	NaN	6.3	NaN	5	6.6	6	5	NaN	NaN	NaN	6.1	5.3	5.4	6.2	6.9	5.7	5.2	5.1	NaN	5.3	NaN	NaN	7.8	5	8.1	NaN	NaN	5.4	5.7	5.5	5.8	5.4	NaN
NaN	NaN	NaN	NaN	NaN	NaN	NaN	NaN	NaN	NaN	NaN	NaN	NaN	NaN	NaN	NaN	NaN	NaN	NaN	NaN	NaN	NaN	NaN	NaN	NaN	5.5	NaN	NaN	NaN	NaN	NaN	NaN	NaN	NaN	NaN	NaN	NaN	NaN	NaN	NaN	NaN	NaN	NaN	NaN	NaN	NaN	NaN	NaN	NaN	NaN
6.4	NaN	5.5	5.5	5	5.9	5.8	5.8	NaN	NaN	5.9	5.3	NaN	NaN	5.1	5.4	5.2	NaN	5.1	NaN	5	6.1	5.1	5.1	NaN	NaN	NaN	5.1	5.8	NaN	7.2	7.9	5.6	5.2	5.1	5.2	5.8	5.8	6.3	6.1	5	6.1	NaN	5.2	5.4	5.7	5.5	5.8	5.4	5.8
6.2	NaN	5.1	5.4	5	6.2	7.7	6.8	NaN	NaN	7.1	5.9	NaN	NaN	6.6	7.1	6.7	NaN	7.7	NaN	5	6.9	NaN	NaN	NaN	NaN	NaN	6.8	6.8	NaN	7.3	8.2	6.6	6.1	7.1	5.6	5.5	5.8	6.3	7.1	6.2	8.1	NaN	5.5	5.4	5.7	6.1	5.8	5.4	5.9
6.2	NaN	5.1	5.1	5	5.9	5.7	5.8	NaN	NaN	5.9	5.5	NaN	NaN	6	5.9	6.3	NaN	5.1	NaN	5	5.9	5.1	5	5.8	NaN	NaN	5.1	5.9	NaN	5.1	6.2	5.6	5.2	5.3	5.2	5.1	5.2	6.2	6.7	5	6	NaN	5.1	NaN	5.8	5.5	5.8	NaN	5.8
NaN	5.4	NaN	NaN	NaN	5.2	NaN	NaN	NaN	NaN	5.2	NaN	NaN	5.4	NaN	NaN	NaN	NaN	NaN	NaN	NaN	NaN	NaN	5.5	5.4	5.9	NaN	5.5	NaN	NaN	5.4	NaN	NaN	5.4	NaN	NaN	NaN	NaN	NaN	5.3	NaN	NaN	NaN	NaN	NaN	NaN	NaN	NaN	NaN	NaN
NaN	NaN	NaN	NaN	NaN	NaN	NaN	NaN	NaN	NaN	NaN	NaN	NaN	NaN	NaN	NaN	NaN	NaN	NaN	4	NaN	NaN	NaN	NaN	NaN	NaN	NaN	NaN	NaN	NaN	NaN	5.9	NaN	NaN	NaN	NaN	NaN	NaN	NaN	NaN	NaN	NaN	NaN	NaN	NaN	NaN	NaN	NaN	NaN	NaN
NaN	NaN	NaN	NaN	NaN	NaN	NaN	NaN	NaN	NaN	NaN	NaN	NaN	NaN	NaN	NaN	NaN	NaN	NaN	NaN	NaN	NaN	NaN	NaN	NaN	NaN	NaN	6	NaN	NaN	NaN	5.7	NaN	NaN	NaN	NaN	NaN	NaN	NaN	NaN	NaN	NaN	NaN	NaN	NaN	NaN	NaN	NaN	NaN	NaN
NaN	NaN	NaN	NaN	NaN	5.2	NaN	NaN	NaN	NaN	5.2	NaN	NaN	NaN	NaN	NaN	NaN	NaN	NaN	NaN	NaN	NaN	NaN	NaN	NaN	NaN	NaN	NaN	NaN	NaN	NaN	5.9	NaN	NaN	NaN	NaN	NaN	NaN	NaN	NaN	NaN	NaN	NaN	NaN	NaN	NaN	NaN	NaN	NaN	NaN
6.8	NaN	5.1	5.1	5	NaN	NaN	NaN	NaN	NaN	NaN	5.1	NaN	NaN	NaN	NaN	NaN	NaN	5.1	NaN	6.8	NaN	5.1	5	NaN	NaN	NaN	5.1	6.1	5.4	NaN	NaN	6.1	NaN	5.1	NaN	NaN	NaN	5.2	5.9	NaN	5.2	NaN	NaN	NaN	7.6	5.1	7.3	7.3	NaN
NaN	NaN	5.1	5.1	5	NaN	NaN	NaN	NaN	NaN	NaN	5.2	NaN	NaN	5.1	5.2	5.2	NaN	5.1	NaN	5	NaN	5.1	5	NaN	NaN	NaN	5.3	5.3	NaN	6	5.9	6.3	5.2	5.1	5.2	5.1	5.2	5.2	NaN	5	5.9	NaN	5.1	NaN	NaN	5.1	NaN	NaN	NaN
7.1	6.4	5.1	5.1	5	6.1	6.2	6.5	NaN	NaN	5.5	5.2	5.6	5.2	5.1	5.2	5.2	NaN	5.1	4	5	5.9	5.1	5.1	5.4	5.7	5.8	5.2	5.3	5.4	5.3	5.2	5.7	5.3	5.2	5.2	5.1	5.2	5.2	5.6	5	5.4	5.9	5.1	5.4	5.8	6.3	5.8	5.5	5.8
NaN	NaN	NaN	NaN	NaN	NaN	NaN	NaN	NaN	NaN	NaN	NaN	NaN	NaN	NaN	NaN	NaN	NaN	5.4	NaN	NaN	NaN	5.7	NaN	NaN	NaN	NaN	NaN	NaN	NaN	NaN	NaN	NaN	NaN	5.2	NaN	NaN	NaN	NaN	NaN	NaN	NaN	NaN	NaN	NaN	NaN	NaN	NaN	NaN	NaN
NaN	NaN	5.1	5.1	5	5.9	5.7	5.8	NaN	NaN	5.9	5.3	NaN	NaN	5.1	5.2	5.2	NaN	6	NaN	5	5.9	6.4	5.2	NaN	NaN	NaN	5.1	5.8	NaN	5.1	5	5.6	5.2	5.1	5.2	5.1	5.2	5.2	5.9	5	5.6	NaN	5.1	5.4	5.7	5.5	5.8	5.4	5.8
NaN	NaN	NaN	NaN	NaN	NaN	NaN	NaN	NaN	NaN	NaN	NaN	NaN	NaN	NaN	NaN	NaN	NaN	NaN	NaN	NaN	NaN	NaN	NaN	NaN	6	NaN	NaN	NaN	NaN	NaN	NaN	NaN	NaN	NaN	NaN	NaN	NaN	NaN	NaN	NaN	NaN	NaN	NaN	NaN	NaN	NaN	NaN	NaN	NaN
5.4	5.4	5.1	5.1	5.1	5.2	5.7	5.8	NaN	NaN	5.2	5.1	5.8	5.4	5.1	5.9	5.4	5.6	5.1	NaN	5	5.9	5.1	5.4	5.4	5.8	5.8	5.4	5.8	NaN	5.7	5.5	5.6	5.4	5.1	NaN	5.1	NaN	5.2	5.3	5	5.7	5.6	5.1	5.4	5.7	5.5	5.8	5.4	5.8
NaN	NaN	5.5	5.5	5.4	NaN	NaN	NaN	NaN	NaN	NaN	5.4	NaN	NaN	5.8	5.9	5.9	NaN	5.1	5.5	5.1	NaN	5.3	5.1	NaN	NaN	NaN	5.1	5.3	5.4	5.2	6.4	NaN	5.2	5.1	5.2	5.1	5.2	5.4	NaN	5	6.1	NaN	5.2	5.8	NaN	NaN	NaN	5.4	NaN
6.2	6	5.9	5.1	5.6	5.7	5.7	5.8	NaN	NaN	5.4	5.8	5.6	5.4	5.4	5.5	5.2	NaN	6.2	NaN	5.4	5.9	6	5.3	6	6.3	5.8	5.1	5.8	NaN	5.9	6.8	5.6	5.4	5.1	NaN	5.1	NaN	5.2	5.9	5	5.9	6.8	5.1	5.4	5.7	5.5	5.8	5.4	5.8
6.2	NaN	5.1	5.1	5	NaN	NaN	6.7	NaN	NaN	NaN	5.1	NaN	NaN	NaN	NaN	NaN	NaN	5.1	NaN	5.8	NaN	5.1	5	NaN	NaN	NaN	5.1	5.9	5.4	NaN	NaN	6	NaN	6	NaN	NaN	NaN	5.2	5.9	NaN	5.2	NaN	NaN	NaN	5.7	5.1	5.8	5.7	NaN
6.2	NaN	5.1	5.1	5	NaN	6.6	5.8	NaN	NaN	NaN	5.1	NaN	NaN	5.1	5.2	5.2	NaN	5.1	4	5	5.9	5.1	5	NaN	NaN	NaN	NaN	5.3	5.4	5.1	6.4	6.3	5.2	5.1	5.2	5.1	NaN	NaN	5.9	5	5.3	NaN	NaN	5.4	6.6	5.5	6	5.4	NaN
4.1	4.4	NaN	NaN	NaN	4.2	NaN	NaN	NaN	NaN	NaN	NaN	4.6	NaN	NaN	NaN	NaN	NaN	NaN	NaN	NaN	NaN	NaN	6	4.7	5.2	4.8	6	NaN	NaN	4.5	5.6	4.5	4.6	NaN	NaN	NaN	NaN	NaN	4.7	NaN	4.8	4.9	NaN	NaN	NaN	NaN	NaN	NaN	NaN
6.2	NaN	5.1	5.1	5	5.9	5.7	5.8	NaN	NaN	5.9	5.3	NaN	NaN	5.2	5.2	5.2	NaN	5.1	NaN	5.2	5.9	5.1	5	NaN	NaN	NaN	5.1	5.8	NaN	5.1	5.2	5.6	6.3	7.6	5.2	5.3	5.4	5.2	5.9	5	5.2	NaN	5.1	5.4	NaN	5.5	NaN	5.7	5.8
5.4	5.4	NaN	NaN	NaN	5.2	NaN	NaN	NaN	NaN	5.3	NaN	5.6	5.1	NaN	NaN	NaN	NaN	NaN	NaN	NaN	NaN	NaN	5.5	5.8	5.4	5.8	NaN	NaN	NaN	5.4	5.6	5.6	5.4	NaN	NaN	NaN	NaN	NaN	5.3	NaN	5.7	5.6	NaN	NaN	NaN	NaN	NaN	NaN	NaN
6.2	NaN	5.1	5.1	5	5.9	5.7	5.8	NaN	NaN	5.9	5.2	NaN	NaN	5.1	5.2	5.2	NaN	5.1	NaN	5	5.9	5.1	5	NaN	NaN	NaN	5.1	5.3	5.4	5.1	5	5.6	6.1	7.7	5.2	5.1	5.2	5.2	5.9	5	5.2	NaN	5.1	5.4	5.7	5.5	5.8	5.4	5.8
7.5	NaN	5.1	5.1	5	7.9	8.9	7	NaN	NaN	6.2	5.6	NaN	NaN	5.5	5.5	5.9	NaN	5.2	NaN	5	5.9	5.1	5	NaN	NaN	NaN	5.1	5.5	5.4	5.4	5.9	7.7	5.3	5.6	5.5	5.3	5.2	5.2	6.9	5	5.2	NaN	5.1	5.4	5.7	7.4	5.8	5.4	6.6
NaN	NaN	5.1	5.1	5	5.9	5.7	5.8	NaN	NaN	5.9	5.2	NaN	NaN	5.1	5.2	5.2	NaN	5.1	NaN	6.2	6.2	5.1	5	NaN	NaN	NaN	5.1	6.3	5.4	5.1	5.7	5.6	5.2	5.1	6.4	6	6.3	5.2	7.1	5	5.2	NaN	5.1	5.4	5.7	5.5	5.8	5.4	5.8
NaN	NaN	5.1	5.1	5	NaN	NaN	NaN	NaN	NaN	NaN	NaN	NaN	NaN	5.1	NaN	NaN	NaN	5.1	NaN	5	NaN	5.1	NaN	NaN	NaN	NaN	NaN	NaN	NaN	NaN	6.1	NaN	NaN	5.1	NaN	NaN	NaN	NaN	6.1	5	NaN	NaN	NaN	NaN	NaN	NaN	NaN	NaN	NaN
6.2	NaN	5.4	5.1	5.5	5.9	5.7	5.8	NaN	NaN	NaN	6.2	NaN	NaN	NaN	NaN	NaN	NaN	5.5	NaN	5	5.9	5.6	5.6	NaN	NaN	NaN	5.1	6	5.4	5.6	6	5.6	5.2	5.1	NaN	5.1	NaN	5.2	5.9	5.8	5.2	NaN	NaN	5.4	5.7	5.3	5.8	5.4	NaN
6.9	NaN	5.2	5.1	5	7	7.4	8	NaN	NaN	NaN	6.1	NaN	NaN	NaN	NaN	NaN	NaN	7.7	NaN	6.1	8.2	7.8	7.6	NaN	NaN	NaN	6.5	7	5.5	7.5	7.9	7.9	6.1	7.2	NaN	6.2	NaN	8.4	6.7	5.1	8.2	NaN	NaN	5.4	6	6.9	5.8	6.7	NaN
5.6	5.4	NaN	NaN	NaN	5.5	NaN	NaN	NaN	NaN	5.2	NaN	5.6	5.4	NaN	NaN	NaN	NaN	NaN	NaN	NaN	NaN	NaN	5.5	5.6	5.4	5.8	6.5	NaN	NaN	6.8	6.9	5.6	5.4	NaN	NaN	NaN	NaN	NaN	5.3	NaN	5.7	6.1	NaN	NaN	NaN	NaN	NaN	NaN	NaN
6.2	NaN	5.1	5.1	5	5.9	5.7	5.8	NaN	NaN	5.9	5.2	NaN	NaN	5.2	5.3	5.4	NaN	5.1	NaN	5	6.2	5.1	5	NaN	NaN	NaN	5.1	5.3	5.6	5.5	7.1	5.6	5.2	5.7	5.2	5.1	5.2	5.2	5.9	5	6.4	NaN	5.2	5.4	5.7	5.3	5.8	5.4	5.8
NaN	NaN	5.1	5.1	5	5.9	5.7	5.8	NaN	NaN	5.9	5.1	NaN	NaN	5.1	5.2	5.2	NaN	5.8	4	5.3	6.1	6	6.2	NaN	NaN	NaN	5.1	5.1	5.4	5.8	6.7	5.6	5.5	5.7	6.4	6.6	6.1	5.2	5.9	5	5.9	NaN	5.1	5.4	5.7	5.5	5.8	5.4	5.8
NaN	NaN	NaN	NaN	NaN	NaN	NaN	NaN	NaN	NaN	NaN	NaN	NaN	NaN	NaN	NaN	NaN	NaN	NaN	NaN	NaN	NaN	NaN	NaN	NaN	NaN	NaN	NaN	NaN	NaN	NaN	5.6	NaN	5.7	NaN	NaN	NaN	NaN	NaN	NaN	NaN	NaN	NaN	NaN	NaN	NaN	NaN	NaN	NaN	NaN
5.6	5.4	NaN	NaN	NaN	5.2	NaN	NaN	NaN	NaN	5.4	NaN	5.6	5.2	NaN	NaN	NaN	NaN	NaN	NaN	NaN	NaN	NaN	5.5	5.4	5.4	5.8	5.5	NaN	NaN	5.6	5.9	5.6	5.4	NaN	NaN	NaN	NaN	NaN	5.3	NaN	6	5.9	NaN	NaN	NaN	NaN	NaN	NaN	NaN
NaN	5.4	NaN	NaN	NaN	5.9	NaN	NaN	NaN	NaN	5.2	NaN	5.7	5.5	NaN	NaN	NaN	5.6	NaN	NaN	NaN	NaN	NaN	NaN	NaN	5.4	NaN	NaN	NaN	NaN	5.5	NaN	5.6	5.8	NaN	NaN	NaN	NaN	NaN	NaN	NaN	5.8	5.6	NaN	NaN	NaN	NaN	NaN	NaN	NaN
NaN	NaN	5.1	5.1	5	NaN	NaN	NaN	NaN	NaN	NaN	5.1	NaN	NaN	NaN	NaN	NaN	NaN	5.6	NaN	5	NaN	5.1	5	NaN	NaN	NaN	5.1	5	NaN	NaN	NaN	NaN	NaN	5.1	NaN	NaN	NaN	5.2	NaN	NaN	6.3	NaN	NaN	NaN	NaN	5.1	NaN	NaN	NaN
7	5.7	5.1	5.1	5	5.5	6.5	6.6	NaN	NaN	5.4	5.2	5.6	5.2	5.3	5.2	5.2	NaN	5.1	NaN	5	5.9	5.1	5.1	5.4	5.7	5.8	5.2	5.6	5.4	5.3	5.4	7.1	5.3	5.1	5.2	5.1	5.2	5.2	5.6	5	5.4	5.9	5.1	5.4	6	5.5	6.4	5.9	6
5.8	5.4	5.1	5.1	5	7.6	NaN	5.8	NaN	NaN	6.3	5.8	5.7	5.4	5.2	6.5	6.1	8.9	6.1	NaN	5	6.5	5.7	5.5	6.4	5.4	5.8	6	6.5	NaN	6.3	7.8	5.8	5.5	5.2	5.2	5.1	5.2	7	7	5.2	6.4	6.1	6.3	NaN	7.5	5.5	7.2	7.1	8
6.2	NaN	5.1	5.1	5	NaN	5.7	5.8	NaN	NaN	5.9	5.3	NaN	NaN	5.1	5.2	5.2	NaN	6.6	NaN	5	5.9	6.2	5.9	NaN	NaN	NaN	5.1	5.8	NaN	6.3	7.5	5.6	5.9	5.1	7.2	7.4	7	5.6	5.9	5	7.2	NaN	5.1	5.4	5.7	5.5	5.8	5.4	5.8
6.2	NaN	5.1	5.1	5	5.9	5.9	7.5	NaN	NaN	5.9	5.3	NaN	NaN	5.1	5.2	5.2	NaN	5.3	5.7	5	5.9	5.1	5	NaN	NaN	NaN	5.1	5.8	NaN	5.3	5.5	6.3	5.7	5.6	7.7	6.1	5.7	5.2	5.9	5	5.2	NaN	5.1	NaN	5.7	5.5	5.8	5.4	6
6.2	NaN	5.1	5.1	5	5.9	5.7	5.9	NaN	NaN	5.9	5.2	NaN	NaN	5.1	5.2	5.2	NaN	5.1	NaN	5	5.9	5.1	5	NaN	NaN	NaN	5.1	5.3	5.4	5.1	5	5.6	7	7.6	6.4	5.3	5.3	5.2	5.9	5	5.2	NaN	5.1	5.4	6.7	5.3	6	6.7	5.8
6.2	NaN	5.1	5.1	5	5.9	5.7	5.8	NaN	NaN	NaN	5.4	NaN	NaN	5.1	5.2	5.2	NaN	5.1	NaN	5	5.9	5.8	5	NaN	NaN	NaN	5.1	5.4	5.4	5.1	5.8	5.6	5.2	5.1	5.5	5.1	NaN	5.2	5.9	5	5.2	NaN	NaN	5.4	5.7	5.5	5.8	5.4	NaN
6.2	NaN	5.1	5.1	5	NaN	NaN	6.2	NaN	NaN	NaN	5.2	NaN	NaN	NaN	NaN	NaN	NaN	5.1	NaN	5.9	NaN	5.1	5	NaN	NaN	NaN	5.1	5.2	5.4	NaN	NaN	6.3	NaN	5.8	NaN	NaN	NaN	5.2	5.9	NaN	5.2	NaN	NaN	NaN	5.7	5.1	5.8	5.4	NaN
NaN	NaN	NaN	NaN	NaN	NaN	NaN	NaN	NaN	NaN	NaN	NaN	NaN	NaN	NaN	NaN	NaN	NaN	NaN	NaN	NaN	NaN	NaN	NaN	NaN	NaN	NaN	NaN	NaN	NaN	NaN	NaN	NaN	NaN	NaN	NaN	NaN	NaN	NaN	NaN	NaN	5.5	NaN	NaN	NaN	NaN	NaN	NaN	NaN	NaN
NaN	NaN	5.1	5.1	5	NaN	NaN	NaN	NaN	NaN	NaN	NaN	NaN	NaN	5.1	NaN	NaN	NaN	5.1	NaN	5	NaN	5.1	5	NaN	NaN	NaN	5.1	NaN	NaN	5.1	5	NaN	NaN	5.1	NaN	NaN	NaN	NaN	NaN	5	NaN	NaN	NaN	NaN	NaN	NaN	NaN	NaN	NaN
6.2	NaN	5.3	5.1	5	5.9	5.7	5.8	NaN	NaN	5.9	5.3	NaN	NaN	5.7	6.3	6.1	NaN	6.6	NaN	5	5.9	6.2	7	5.8	5.4	NaN	7.2	6.5	NaN	5.3	6	5.6	5.2	5.1	5.2	5.1	5.2	5.9	6	5	6.5	NaN	5.1	NaN	6.1	5.5	5.8	NaN	5.8
7.1	7.4	NaN	NaN	NaN	6.6	NaN	NaN	NaN	NaN	5.6	NaN	5.7	5.4	NaN	NaN	NaN	NaN	NaN	4	NaN	NaN	NaN	8.1	6.5	5.7	7.2	6.9	NaN	NaN	7.3	8.5	7.2	7.1	NaN	NaN	NaN	NaN	NaN	7.6	NaN	7.2	7.8	NaN	NaN	NaN	NaN	NaN	NaN	NaN
NaN	NaN	NaN	5.1	5	NaN	NaN	NaN	NaN	NaN	NaN	5.4	NaN	NaN	5.2	5.4	5.5	NaN	6.1	NaN	5	NaN	6.6	5.9	NaN	NaN	NaN	5.1	NaN	NaN	6	6.2	NaN	5.2	5.1	5.2	5.1	5.2	5.2	NaN	5	5.8	NaN	5.1	NaN	NaN	5.5	NaN	5.4	NaN
NaN	NaN	NaN	NaN	NaN	NaN	NaN	NaN	NaN	NaN	NaN	NaN	NaN	NaN	NaN	NaN	NaN	NaN	NaN	NaN	NaN	NaN	NaN	NaN	NaN	NaN	NaN	NaN	NaN	NaN	NaN	NaN	NaN	NaN	NaN	NaN	NaN	NaN	NaN	NaN	NaN	NaN	NaN	NaN	NaN	NaN	NaN	NaN	NaN	NaN
6.7	NaN	5.1	5.1	5	5.8	7.8	7.2	NaN	NaN	5.9	5.2	NaN	NaN	5.1	5.2	5.2	NaN	5.1	NaN	5	5.9	5.1	5	NaN	NaN	NaN	5.1	5.6	5.4	5.2	6.1	8.7	5.2	5.9	6.1	5.8	5.6	5.2	5.9	5	5.2	NaN	5.1	5.4	5.7	6.6	5.8	5.4	5.9
7	NaN	6.8	6.4	7.4	5.9	6.6	7.8	NaN	NaN	6.5	5.3	NaN	NaN	5.1	5.3	5.4	NaN	6	NaN	5	5.9	6.2	5	NaN	NaN	NaN	NaN	6.9	NaN	5.3	6.3	5.6	5.2	5.1	5.2	5.1	5.2	6	5.9	5	5.2	NaN	5.1	5.4	6.4	5.8	5.8	7	6.5
6.2	NaN	5.1	5.1	5	5.9	5.7	6.5	NaN	NaN	5.9	5.2	NaN	NaN	5.1	5.2	5.2	NaN	5.1	NaN	5	5.9	5.1	5	NaN	NaN	NaN	5.1	6.2	5.4	5.8	6.5	7.8	5.2	5.1	5.2	5.2	5.2	5.6	5.9	5	5.2	NaN	5.1	5.4	5.7	5.8	5.8	5.4	5.8
6.2	NaN	5.1	5.1	5	NaN	NaN	6.4	NaN	NaN	NaN	5.1	NaN	NaN	NaN	NaN	NaN	NaN	5.1	NaN	5.7	NaN	5.1	5	NaN	NaN	NaN	5.1	5.5	5.4	NaN	NaN	5.9	NaN	6.4	NaN	NaN	NaN	5.2	5.9	NaN	5.2	NaN	NaN	NaN	5.7	5.1	5.8	5.4	NaN
6.2	NaN	5.1	5.1	5	5.9	NaN	7.4	NaN	NaN	6.8	5.3	NaN	NaN	5.1	5.2	5.2	NaN	5.1	NaN	5	5.9	5.1	5	NaN	NaN	NaN	5.1	5.8	NaN	5.1	5	5.6	5.2	5.1	5.2	5.1	5.2	5.2	5.9	5	5.2	NaN	5.1	NaN	5.7	5.5	5.8	5.9	6.5
6.5	5.4	NaN	NaN	NaN	5.8	NaN	NaN	NaN	NaN	5.2	NaN	5.6	5.4	NaN	NaN	NaN	NaN	NaN	NaN	NaN	NaN	NaN	5.5	5.4	5.4	5.8	5.5	NaN	NaN	5.4	5.6	7.7	5.4	NaN	NaN	NaN	NaN	NaN	5.3	NaN	5.7	5.6	NaN	NaN	NaN	NaN	NaN	NaN	NaN
NaN	NaN	NaN	NaN	NaN	NaN	NaN	NaN	NaN	NaN	NaN	NaN	NaN	NaN	5.1	NaN	NaN	NaN	NaN	NaN	NaN	NaN	NaN	NaN	NaN	NaN	NaN	NaN	NaN	NaN	NaN	NaN	NaN	NaN	NaN	NaN	NaN	NaN	NaN	NaN	NaN	NaN	NaN	NaN	NaN	NaN	NaN	NaN	NaN	NaN
6.2	NaN	5.1	5.1	5	5.9	NaN	5.8	NaN	NaN	5.9	5.3	NaN	NaN	5.1	5.2	5.6	NaN	6.3	NaN	5	7.7	6.5	6.9	NaN	NaN	NaN	5.1	5.8	NaN	6.9	8	6.2	5.2	5.1	5.2	5.1	5.2	5.2	5.9	5	6.3	NaN	5.1	NaN	5.7	5.5	5.8	5.4	5.8
NaN	NaN	5.1	5.1	5	5.9	5.7	5.8	NaN	NaN	5.9	5.3	NaN	NaN	5.1	5.2	5.2	NaN	5.1	NaN	5	5.9	5.6	5	5.8	NaN	NaN	5.1	5.8	NaN	5.1	5.1	5.6	5.2	5.1	5.2	5.1	5.2	5.2	5.9	5	5.2	NaN	5.1	NaN	5.7	5.5	5.8	NaN	5.8
5.8	5.4	6.3	5.5	5	5.8	NaN	5.8	NaN	NaN	5.4	5.2	5.8	5.5	5.6	7.5	7.1	NaN	5.9	NaN	5	5.9	6.9	5.5	5.4	5.4	5.8	5.3	5.8	NaN	5.6	5.3	5.6	5.3	5.1	5.2	5.1	5.2	5.2	5.5	5	5.4	5.6	5.1	NaN	5.9	5.5	6.1	5.4	6.5
6.2	NaN	5.1	5.6	5.3	NaN	5.7	5.8	NaN	NaN	5.9	5.2	NaN	NaN	5.2	5.8	5.2	NaN	8.2	5.5	5.5	5.9	7.2	7.7	5.2	6	6.2	6.9	5.8	NaN	5.1	5	5.6	5.2	5.1	NaN	5.1	NaN	5.2	5.9	5	5.2	NaN	5.3	5.4	5.7	5.5	5.8	5.4	5.8
NaN	NaN	NaN	NaN	NaN	5.6	NaN	NaN	NaN	NaN	NaN	NaN	NaN	NaN	NaN	NaN	NaN	NaN	NaN	NaN	NaN	NaN	NaN	NaN	NaN	NaN	NaN	NaN	NaN	NaN	NaN	NaN	NaN	NaN	NaN	NaN	NaN	NaN	NaN	NaN	NaN	NaN	NaN	NaN	NaN	NaN	NaN	NaN	NaN	NaN
6.2	NaN	5.1	5.1	5	5.9	5.7	6.7	NaN	NaN	5.9	5.3	NaN	NaN	5.1	5.2	5.2	NaN	5.1	NaN	5	5.9	5.1	5	NaN	NaN	NaN	5.1	5.8	NaN	5.1	5.3	5.6	5.7	5.4	7.7	6	5.5	5.2	5.9	5	5.2	NaN	5.1	NaN	5.7	5.5	5.8	5.4	5.8
NaN	NaN	NaN	NaN	NaN	NaN	NaN	NaN	NaN	NaN	NaN	NaN	NaN	NaN	NaN	NaN	NaN	NaN	NaN	NaN	NaN	NaN	NaN	NaN	NaN	NaN	NaN	NaN	NaN	NaN	NaN	NaN	NaN	NaN	NaN	NaN	NaN	NaN	NaN	NaN	NaN	NaN	NaN	NaN	NaN	NaN	NaN	NaN	NaN	NaN
6.2	NaN	5.2	5.7	5.2	NaN	5.7	5.8	NaN	NaN	5.9	5.4	NaN	NaN	5.4	5.9	6	NaN	6.2	NaN	6.6	6.2	6.6	5.7	NaN	NaN	NaN	5.1	5.8	NaN	7.1	7.7	6.4	5.7	6.4	6.2	6.5	5.6	5.2	6.4	5	6.9	NaN	5.1	5.4	NaN	5.7	NaN	5.4	5.8
NaN	NaN	5.1	5.1	5	5.9	5.7	5.8	NaN	NaN	5.9	5.1	NaN	NaN	5.1	5.2	5.2	NaN	5.1	NaN	5	5.9	5.1	5	NaN	NaN	NaN	5.1	5.3	5.4	5.1	5	5.6	5.4	7	5.2	5.1	5.2	5.2	5.9	5	5.2	NaN	5.1	5.4	6.7	5.3	5.8	5.5	5.8
6.8	7	NaN	NaN	NaN	5.5	NaN	NaN	NaN	NaN	5.2	NaN	6.2	5.1	NaN	6.4	NaN	NaN	NaN	NaN	NaN	NaN	6.7	6.4	5.4	5.4	5.8	NaN	NaN	NaN	5.7	5.8	5.6	6.6	NaN	NaN	NaN	NaN	NaN	6.3	NaN	6.7	6	NaN	NaN	NaN	NaN	NaN	NaN	NaN
6.2	NaN	5.1	5.1	5	5.9	5.7	5.8	NaN	NaN	5.9	5.4	NaN	NaN	5.2	6.1	5.4	NaN	5.4	NaN	5	5.9	5.1	5	NaN	NaN	NaN	5.1	6.8	5.4	5.9	7.2	5.6	6	6.7	6.6	6.5	NaN	6.2	7.6	5	8.4	NaN	6.5	5.4	5.7	5.3	5.8	5.4	5.8
6.2	NaN	5.9	5.6	5.9	5.9	5.7	5.8	NaN	NaN	5.9	5.3	NaN	NaN	5.2	5.5	5.3	NaN	5.1	NaN	6	5.9	5.1	5.5	NaN	NaN	NaN	5.1	6.3	NaN	5.8	7	5.6	5.2	5.1	5.2	5.1	5.2	5.2	6	5	6.4	NaN	5.1	5.4	NaN	5.5	5.8	5.4	5.8
NaN	NaN	5.1	5.1	5	NaN	NaN	5.9	NaN	NaN	NaN	5.1	NaN	NaN	NaN	NaN	NaN	NaN	5.1	NaN	5	NaN	5.6	5.7	NaN	NaN	NaN	5.1	5.5	5.4	NaN	NaN	5.6	NaN	6.3	NaN	NaN	NaN	5.2	NaN	NaN	5.2	NaN	NaN	NaN	NaN	5.1	NaN	5.4	NaN
6.2	NaN	5.1	5.1	5	NaN	7.5	6.5	NaN	NaN	5.9	5.2	NaN	NaN	5.1	5.2	5.2	NaN	5.1	NaN	5	5.9	5.1	5	NaN	NaN	NaN	5.1	5.9	NaN	5.9	6.6	5.6	5.2	5.1	5.7	5.6	5.5	5.2	5.9	5.1	5.5	NaN	5.1	5.4	5.7	7.4	5.8	5.4	5.8
6.2	NaN	5.1	5.1	5	5.9	5.7	5.8	NaN	NaN	5.9	5.7	NaN	NaN	5.2	5.4	5.4	NaN	5.1	4	5	5.9	5.1	5	NaN	NaN	NaN	5.1	5.8	NaN	5.1	6	5.7	5.2	5.1	5.2	5.1	5.2	5.2	5.9	5	5.2	NaN	5.1	NaN	5.7	5.5	5.8	5.4	5.8
NaN	NaN	NaN	NaN	NaN	NaN	NaN	NaN	NaN	NaN	NaN	NaN	NaN	NaN	NaN	NaN	NaN	NaN	NaN	5.4	NaN	NaN	NaN	NaN	NaN	NaN	NaN	NaN	NaN	NaN	NaN	NaN	NaN	NaN	NaN	NaN	NaN	NaN	NaN	NaN	NaN	NaN	NaN	NaN	NaN	NaN	NaN	NaN	NaN	NaN
NaN	NaN	NaN	NaN	NaN	NaN	NaN	NaN	NaN	NaN	NaN	NaN	NaN	NaN	NaN	NaN	NaN	NaN	5.1	NaN	NaN	NaN	5.1	5	NaN	NaN	NaN	NaN	5.4	NaN	NaN	NaN	NaN	NaN	5.4	NaN	NaN	NaN	NaN	NaN	NaN	NaN	NaN	NaN	NaN	NaN	NaN	NaN	NaN	NaN
NaN	NaN	5.1	5.1	5	NaN	NaN	NaN	NaN	NaN	NaN	NaN	NaN	NaN	NaN	NaN	NaN	NaN	NaN	NaN	NaN	NaN	NaN	NaN	NaN	NaN	NaN	5.1	NaN	NaN	NaN	NaN	NaN	NaN	NaN	NaN	NaN	NaN	NaN	NaN	NaN	NaN	NaN	NaN	NaN	5.8	NaN	NaN	NaN	NaN
NaN	NaN	NaN	NaN	NaN	NaN	NaN	NaN	NaN	NaN	NaN	NaN	NaN	NaN	NaN	NaN	NaN	NaN	NaN	NaN	NaN	NaN	NaN	NaN	NaN	NaN	NaN	NaN	NaN	NaN	NaN	NaN	NaN	NaN	NaN	NaN	NaN	NaN	NaN	NaN	NaN	NaN	NaN	NaN	NaN	NaN	NaN	NaN	NaN	NaN
6.6	8.5	NaN	NaN	NaN	6.6	NaN	NaN	NaN	NaN	5.2	NaN	5.6	5.8	NaN	NaN	NaN	NaN	NaN	NaN	NaN	NaN	NaN	8	5.4	5.4	6.3	6.8	NaN	NaN	5.4	7.1	5.6	5.4	NaN	NaN	NaN	NaN	NaN	7.2	NaN	6.5	7	NaN	NaN	NaN	NaN	NaN	NaN	NaN
NaN	NaN	NaN	NaN	NaN	NaN	NaN	NaN	NaN	NaN	NaN	NaN	NaN	NaN	NaN	NaN	NaN	NaN	NaN	NaN	NaN	NaN	NaN	NaN	NaN	NaN	NaN	NaN	NaN	NaN	NaN	NaN	NaN	NaN	NaN	NaN	NaN	NaN	NaN	NaN	NaN	NaN	NaN	NaN	NaN	NaN	NaN	NaN	NaN	NaN
6.2	NaN	5.1	5.1	5	5.9	5.7	5.8	NaN	NaN	5.9	5.3	NaN	NaN	5.1	5.2	5.2	NaN	5.1	NaN	5	5.9	5.1	5	NaN	NaN	NaN	5.1	5.8	NaN	5.1	5.4	5.6	6.2	7.2	5.2	5.1	5.2	5.2	5.9	5	5.2	NaN	5.1	5.4	NaN	5.5	NaN	5.4	5.8
6.1	5.9	NaN	NaN	NaN	5.9	NaN	NaN	NaN	NaN	5.9	NaN	6.3	6	NaN	NaN	NaN	NaN	NaN	NaN	NaN	NaN	NaN	6.1	6.3	6.5	6.8	7.4	NaN	NaN	5.4	7.1	5.7	5.8	NaN	NaN	NaN	NaN	NaN	5.6	NaN	6.7	6.4	NaN	NaN	NaN	NaN	NaN	NaN	NaN
5.4	5	NaN	NaN	NaN	5	NaN	NaN	NaN	NaN	NaN	NaN	4	4.5	NaN	NaN	NaN	NaN	NaN	4	NaN	NaN	NaN	5.2	4.4	4.9	4.2	4.6	NaN	NaN	5.3	6.4	4	4.8	NaN	NaN	NaN	NaN	NaN	5.1	NaN	5.5	5.7	NaN	NaN	NaN	NaN	NaN	NaN	NaN
4.4	6.5	NaN	NaN	NaN	4.4	NaN	NaN	NaN	NaN	4.6	NaN	4.8	4.8	NaN	NaN	NaN	NaN	NaN	NaN	NaN	NaN	NaN	5.1	4.7	NaN	5.6	NaN	NaN	NaN	5.1	6.3	4.4	5	NaN	NaN	NaN	NaN	NaN	4.9	NaN	5.8	5.5	NaN	NaN	NaN	NaN	NaN	NaN	NaN
8	NaN	5.1	5.1	5	7.6	NaN	7.5	NaN	NaN	NaN	5.1	NaN	NaN	NaN	NaN	NaN	NaN	5.1	4	5	NaN	5.1	5	NaN	NaN	NaN	5.1	5.3	5.4	NaN	NaN	7.7	NaN	6.2	NaN	NaN	NaN	5.2	5.9	NaN	5.2	NaN	NaN	NaN	5.7	7.3	5.8	5.4	NaN
6.2	NaN	5.3	5.1	5.4	NaN	NaN	5.8	NaN	NaN	NaN	5.1	NaN	NaN	NaN	NaN	NaN	NaN	5.2	NaN	5	NaN	5.6	5.5	NaN	NaN	NaN	5.1	5.1	5.4	NaN	NaN	7.9	NaN	5.5	NaN	NaN	NaN	5.9	5.9	NaN	5.2	NaN	NaN	NaN	5.7	5.5	5.8	5.4	NaN
NaN	NaN	NaN	NaN	NaN	NaN	NaN	NaN	NaN	NaN	NaN	NaN	NaN	NaN	NaN	NaN	NaN	NaN	NaN	NaN	NaN	NaN	NaN	NaN	NaN	5.6	NaN	NaN	NaN	NaN	NaN	6.1	NaN	NaN	NaN	NaN	NaN	NaN	NaN	NaN	NaN	NaN	NaN	NaN	NaN	NaN	NaN	NaN	NaN	NaN
6.2	NaN	NaN	NaN	NaN	NaN	NaN	6.2	NaN	NaN	NaN	NaN	NaN	NaN	NaN	NaN	NaN	NaN	NaN	NaN	NaN	NaN	NaN	NaN	NaN	NaN	NaN	NaN	NaN	NaN	NaN	NaN	8.8	NaN	NaN	NaN	NaN	NaN	NaN	NaN	NaN	NaN	NaN	NaN	NaN	NaN	NaN	NaN	NaN	NaN
6.2	NaN	5.1	5.1	5	6.9	7.8	5.8	NaN	NaN	5.9	5.3	NaN	NaN	5.1	5.2	5.2	NaN	5.1	NaN	5	5.9	5.1	5	NaN	NaN	NaN	5.1	5.8	NaN	5.1	5	5.6	5.2	5.1	5.2	5.1	5.2	5.2	5.9	5	5.2	NaN	5.1	5.4	5.7	6.4	5.8	5.4	5.8
6.2	NaN	5.3	5.1	5	NaN	5.7	5.8	NaN	NaN	5.9	5.3	NaN	NaN	5.1	5.2	5.2	NaN	5.1	NaN	5	5.6	5.1	5	NaN	NaN	NaN	5.1	5.8	NaN	5.1	6.2	5.6	5.2	5.1	5.2	5.1	5.2	5.2	5.9	5	5.4	NaN	5.1	5.4	NaN	5.5	NaN	5.4	5.8
6.2	NaN	5.1	5.1	5	5.9	6.1	5.8	NaN	NaN	5.9	6.1	NaN	NaN	5.4	6.3	6.5	NaN	7.7	4	5	7.6	7.7	7.9	NaN	6.1	NaN	5.1	6.2	6.6	8.3	NaN	6.4	6	6.4	6.5	7.2	6	5.5	6.3	5	7.4	NaN	5.1	5.4	5.7	5.5	5.8	5.4	7.1
5.7	5.4	5.1	5.1	5	5.9	NaN	8.2	NaN	NaN	6.2	5.6	5.7	5.2	5.1	5.2	6.4	5.6	6.4	NaN	5	8.1	6.9	5.8	5.4	5.4	5.8	5.7	5.8	NaN	5.6	6.9	5.9	5.3	5.1	5.2	5.1	5.2	7.4	7.1	5	5.8	5.6	5.8	NaN	7.2	7	7.5	6.5	7.9
6.2	NaN	5.1	5.1	5	NaN	5.9	5.8	NaN	NaN	5.9	5.3	NaN	NaN	5.1	5.2	5.2	NaN	5.1	NaN	5	5.9	5.1	5	NaN	NaN	NaN	5.1	6.5	NaN	5.1	5.7	5.6	5.2	5.2	5.3	5.5	5.2	5.2	5.9	5	5.6	NaN	5.1	5.4	5.7	5.5	5.8	5.4	5.8
6.2	NaN	5.1	5.1	5	NaN	NaN	6.8	NaN	NaN	NaN	5.1	NaN	NaN	NaN	NaN	NaN	NaN	5.4	NaN	5	NaN	5.2	5.4	NaN	NaN	NaN	5.1	5.6	5.4	NaN	NaN	8.2	NaN	5.3	NaN	NaN	NaN	5.2	5.9	NaN	5.8	NaN	NaN	NaN	5.7	5.5	5.8	5.9	NaN
NaN	NaN	NaN	NaN	NaN	NaN	NaN	NaN	NaN	NaN	NaN	NaN	NaN	NaN	NaN	NaN	NaN	NaN	NaN	5.7	NaN	NaN	NaN	NaN	NaN	NaN	NaN	NaN	NaN	NaN	NaN	NaN	NaN	NaN	NaN	NaN	NaN	NaN	NaN	NaN	NaN	NaN	NaN	NaN	NaN	NaN	NaN	NaN	NaN	NaN
NaN	NaN	NaN	5.1	5	NaN	NaN	NaN	NaN	NaN	NaN	5.3	NaN	NaN	5.1	5.2	5.4	NaN	6	NaN	5	NaN	6.5	5.7	NaN	NaN	NaN	5.1	NaN	NaN	6.1	6.5	NaN	5.2	5.1	5.2	5.1	5.2	5.2	NaN	5	5.2	NaN	5.1	NaN	NaN	5.5	NaN	5.4	NaN
6.2	NaN	5.1	5.1	5.1	NaN	5.8	5.8	NaN	NaN	5.9	5.2	NaN	NaN	5.1	5.2	5.2	NaN	5.4	NaN	5	5.9	5.4	5.2	NaN	NaN	NaN	5.1	5.8	NaN	6	7.1	5.6	5.2	5.2	5.2	5.3	5.2	5.2	5.9	5	5.4	NaN	5.1	5.4	5.7	5.5	5.8	5.4	5.8
NaN	NaN	NaN	NaN	NaN	NaN	NaN	NaN	NaN	NaN	NaN	NaN	NaN	NaN	NaN	NaN	NaN	NaN	NaN	NaN	NaN	NaN	5.3	NaN	NaN	NaN	NaN	NaN	NaN	NaN	NaN	NaN	NaN	NaN	NaN	NaN	NaN	5.2	NaN	NaN	NaN	NaN	NaN	NaN	NaN	NaN	NaN	NaN	NaN	NaN
6.2	NaN	5.1	5.1	5	NaN	NaN	7.1	NaN	NaN	NaN	5.1	NaN	NaN	NaN	NaN	NaN	NaN	5.1	NaN	5	NaN	5.1	5	NaN	NaN	NaN	5.1	5.2	5.4	NaN	NaN	6.9	NaN	5.1	NaN	NaN	NaN	6	5.9	NaN	5.2	NaN	NaN	NaN	6.6	7.1	5.8	5.4	NaN
6.2	NaN	6	6	5.3	NaN	NaN	5.8	NaN	NaN	NaN	5.1	NaN	NaN	NaN	NaN	NaN	NaN	5.1	NaN	5.2	NaN	5.1	5	NaN	NaN	NaN	8.3	5.2	5.4	NaN	NaN	7.4	NaN	5.1	NaN	NaN	NaN	5.2	5.9	NaN	5.2	NaN	NaN	NaN	5.7	5.5	5.8	5.4	NaN
NaN	NaN	5.1	5.1	5	NaN	NaN	NaN	NaN	NaN	NaN	NaN	NaN	NaN	5.3	5.9	6	NaN	5.1	NaN	5	NaN	5.1	5.1	NaN	NaN	NaN	5.1	NaN	NaN	5.7	6.5	NaN	5.2	6.1	5.2	5.1	5.2	5.2	NaN	5	6.2	NaN	5.1	5.4	NaN	NaN	NaN	5.4	NaN
6.3	NaN	5.1	5.1	5	5.6	8.4	5.8	NaN	NaN	6.1	5.4	NaN	NaN	5.3	5.6	5.8	NaN	5.1	NaN	5	5.9	5.2	5	NaN	NaN	NaN	5.1	5.3	5.4	5.2	5	7.6	5.3	5.1	5.5	5.5	5.2	5.2	5.6	5	5.2	NaN	5.1	5.4	5.7	6.5	5.8	5.4	5.7
6.2	NaN	5.1	5.1	5.1	5.8	6.6	6	NaN	NaN	5.9	5.2	NaN	NaN	5.4	5.4	5.3	NaN	5.1	5.7	5	5.9	5.1	5.3	NaN	NaN	NaN	5.1	5.7	5.4	5.7	7.1	8.4	5.2	5.3	5.2	5.4	5.2	5.4	5.9	5	5.3	NaN	5.1	5.4	5.7	5.7	5.8	5.4	5.9
NaN	NaN	5.1	5.1	5	NaN	NaN	5.8	NaN	NaN	NaN	5.1	NaN	NaN	NaN	NaN	NaN	NaN	5.1	NaN	5	NaN	5.1	5	NaN	NaN	NaN	5.1	5	5.4	NaN	NaN	5.9	NaN	5.1	NaN	NaN	NaN	5.2	5.9	NaN	5.2	NaN	NaN	NaN	5.7	5.5	5.8	5.4	NaN
6.2	NaN	NaN	NaN	NaN	NaN	NaN	5.8	NaN	NaN	NaN	NaN	NaN	NaN	NaN	NaN	NaN	NaN	NaN	NaN	NaN	NaN	NaN	NaN	NaN	NaN	NaN	NaN	NaN	NaN	NaN	NaN	8.7	NaN	NaN	NaN	NaN	NaN	NaN	NaN	NaN	NaN	NaN	NaN	NaN	NaN	NaN	NaN	NaN	NaN
6.2	NaN	5.1	5.1	5	5.9	5.7	5.8	NaN	NaN	5.9	5.3	NaN	NaN	5.1	5.2	5.2	NaN	5.1	NaN	5	5.9	5.1	5	NaN	NaN	NaN	5.1	5.8	NaN	5.1	5	5.6	5.8	7.6	5.6	5.5	6	5.2	5.9	5	5.2	NaN	5.1	5.4	NaN	5.5	NaN	5.4	5.8
6.2	NaN	5.5	5.4	5	5.9	5.7	5.8	NaN	NaN	NaN	5.2	NaN	NaN	NaN	NaN	NaN	NaN	5.1	NaN	5.4	5.9	5.2	5	NaN	NaN	NaN	8.4	5.3	5.4	5.1	5	7.7	5.2	5.1	NaN	5.1	NaN	5.2	5.9	5	5.2	NaN	NaN	5.4	5.7	5.5	5.8	5.4	NaN
6.2	NaN	5.1	5.1	5	5.9	5.7	5.8	NaN	NaN	NaN	5.2	NaN	NaN	NaN	NaN	NaN	NaN	5.1	NaN	5	5.9	5.1	5	NaN	NaN	NaN	7.9	5.3	5.4	5.1	5	7.8	5.2	5.1	NaN	5.1	NaN	5.2	5.9	5	5.2	NaN	NaN	5.4	5.7	5.5	5.8	5.4	NaN
6.2	NaN	5.1	5.1	5	5.9	5.7	5.8	NaN	NaN	5.9	5.2	NaN	NaN	5.1	5.2	5.2	NaN	5.1	NaN	5	5.9	5.1	5	NaN	NaN	NaN	5.1	5.3	5.4	5.1	5	5.6	5.2	6	5.2	5.1	5.2	5.2	5.9	5	5.2	NaN	5.1	5.4	5.7	5.5	5.8	5.4	5.8
6.2	NaN	5.1	5.1	5	NaN	5.7	6.8	NaN	NaN	5.9	5.2	NaN	NaN	5.1	5.2	5.2	NaN	5.1	4	5	5.9	5.1	5	NaN	NaN	NaN	5.1	5.8	NaN	5.1	5	6.8	5.2	5.1	5.2	5.1	5.2	5.2	5.9	5	5.2	NaN	5.1	5.4	5.7	5.5	5.8	5.4	6.1
6.2	NaN	5.1	5.1	5	5.9	5.7	5.8	NaN	NaN	5.9	5.3	NaN	NaN	5.1	5.2	5.2	NaN	5.1	NaN	5	5.9	5.1	5	NaN	NaN	NaN	5.1	5.8	NaN	5.1	5	5.6	6.4	8.1	5.7	6.3	6.5	5.2	5.9	5	5.2	NaN	5.1	5.4	NaN	5.5	NaN	5.4	5.8
7.6	5.4	NaN	NaN	NaN	5.2	NaN	NaN	NaN	NaN	5.2	NaN	5.6	5.4	NaN	NaN	NaN	6.1	NaN	NaN	NaN	5.4	NaN	5.5	5.3	8.5	5.8	5.5	NaN	NaN	5.5	6.5	7.3	5.4	NaN	NaN	NaN	NaN	NaN	5.4	NaN	5.7	5.6	NaN	NaN	NaN	NaN	NaN	NaN	NaN
6.2	NaN	5.1	5.1	5	6.3	5.7	5.8	NaN	NaN	5.9	5.7	NaN	NaN	5.1	5.2	5.2	NaN	5.1	NaN	5	5.9	5.1	5	NaN	NaN	NaN	5.1	5.8	NaN	5.1	5	5.6	6.9	NaN	6.1	6	6.6	5.2	5.9	5	5.2	NaN	5.1	5.4	NaN	5.5	NaN	5.4	5.8
6.5	NaN	NaN	NaN	NaN	NaN	NaN	6.9	NaN	NaN	NaN	NaN	NaN	NaN	NaN	NaN	NaN	NaN	NaN	NaN	NaN	NaN	NaN	NaN	NaN	NaN	NaN	NaN	NaN	NaN	NaN	NaN	9.2	NaN	NaN	NaN	NaN	NaN	NaN	NaN	NaN	NaN	NaN	NaN	NaN	NaN	NaN	NaN	NaN	NaN
6.2	NaN	6.2	6	5.7	NaN	NaN	5.8	NaN	NaN	NaN	5.1	NaN	NaN	NaN	NaN	NaN	NaN	5.1	NaN	5.3	NaN	5.7	5	NaN	NaN	NaN	8.3	5	5.4	NaN	NaN	7.6	NaN	5.1	NaN	NaN	NaN	5.2	5.9	NaN	5.2	NaN	NaN	NaN	5.7	5.5	5.8	5.4	NaN
NaN	NaN	5.1	5.1	5	5.9	5.7	6.1	NaN	NaN	5.9	5.2	NaN	NaN	5.1	5.2	5.2	NaN	5.1	NaN	5	5.9	5.1	5	NaN	NaN	NaN	5.1	5.3	5.4	5.1	5	5.6	5.2	5.3	5.2	5.1	5.2	5.2	5.9	5	5.2	NaN	5.1	5.4	5.7	5.3	5.8	5.9	5.8
7.2	NaN	5.1	5.1	5	NaN	NaN	8.2	NaN	NaN	NaN	5.1	NaN	NaN	NaN	NaN	NaN	NaN	5.1	NaN	5	NaN	5.1	5	NaN	NaN	NaN	5.1	5	5.4	NaN	NaN	7.8	NaN	5.1	NaN	NaN	NaN	5.2	5.9	NaN	5.2	NaN	NaN	NaN	5.7	7	5.8	5.4	NaN
6.2	NaN	5.1	5.1	5	NaN	7.3	6.8	NaN	NaN	5.9	5.3	NaN	NaN	5.1	5.2	5.5	NaN	5.1	NaN	5	5.9	5.1	5	NaN	NaN	NaN	5.1	5.8	NaN	5.8	5.4	6.3	5.2	5.1	5.2	5.1	5.2	5.2	5.9	5	5.2	NaN	5.1	5.4	5.7	5.7	5.8	5.4	6.1
5.4	5.4	5.1	5.1	5	5.4	6.9	6.5	NaN	NaN	5.2	5.2	5.6	5.1	5.4	5.4	5.4	5.6	5.1	NaN	5	5.9	5.1	5.5	5.4	9	5.8	5.5	5	5.4	5.4	7.1	8.1	5.4	5.4	5.3	5.4	5.2	5.3	5.3	5	5.7	5.6	5.1	5.4	5.7	5.6	5.8	5.4	6.3
6.2	NaN	NaN	NaN	NaN	NaN	NaN	6.8	NaN	NaN	NaN	NaN	NaN	NaN	NaN	NaN	NaN	NaN	NaN	NaN	NaN	NaN	NaN	NaN	NaN	NaN	NaN	NaN	NaN	NaN	NaN	NaN	9.1	NaN	NaN	NaN	NaN	NaN	NaN	NaN	NaN	NaN	NaN	NaN	NaN	NaN	NaN	NaN	NaN	NaN
5.4	5.4	NaN	NaN	NaN	5.2	NaN	NaN	NaN	NaN	5.2	NaN	5.6	5.2	NaN	NaN	NaN	5.6	NaN	NaN	NaN	NaN	NaN	5.5	5.4	5.4	5.8	5.5	NaN	NaN	5.4	5.6	5.6	5.4	NaN	NaN	NaN	NaN	NaN	5.3	NaN	5.7	5.6	NaN	NaN	NaN	NaN	NaN	NaN	NaN
NaN	NaN	NaN	NaN	NaN	NaN	NaN	NaN	NaN	NaN	NaN	NaN	NaN	NaN	NaN	NaN	NaN	NaN	NaN	7.7	NaN	NaN	NaN	NaN	NaN	NaN	NaN	NaN	NaN	NaN	NaN	NaN	NaN	NaN	NaN	NaN	NaN	NaN	NaN	NaN	NaN	NaN	NaN	NaN	NaN	NaN	NaN	NaN	NaN	NaN
6.2	5.4	5.1	6	6	5.4	NaN	6.6	NaN	NaN	5.4	5.3	5.6	5.1	5.5	5.4	5.5	NaN	5.2	NaN	7.1	6.7	6.4	5.2	5.4	6.7	5.8	6.1	5.8	NaN	5.7	6.9	5.6	5.5	5.7	5.2	5.6	5.2	5.2	5.5	5	6	5.9	5.1	NaN	5.7	5.5	6.5	5.6	6.4
5.4	5.4	NaN	NaN	NaN	5.2	NaN	NaN	NaN	NaN	5.2	NaN	5.6	5.1	NaN	NaN	NaN	NaN	NaN	NaN	NaN	NaN	NaN	5.5	5.4	5.4	5.8	5.5	NaN	NaN	5.4	7.2	5.6	5.4	NaN	NaN	NaN	NaN	NaN	5.3	NaN	5.7	5.6	NaN	NaN	NaN	NaN	NaN	NaN	NaN
NaN	NaN	NaN	NaN	NaN	NaN	NaN	NaN	NaN	NaN	NaN	NaN	NaN	NaN	NaN	NaN	NaN	NaN	NaN	NaN	NaN	7.9	6.2	NaN	NaN	NaN	NaN	NaN	NaN	NaN	NaN	7.2	NaN	NaN	NaN	NaN	NaN	NaN	NaN	NaN	NaN	NaN	NaN	NaN	NaN	NaN	NaN	NaN	NaN	NaN
6.2	NaN	5.1	5.1	5	5.9	5.7	5.8	NaN	NaN	5.9	5.2	NaN	NaN	5.1	5.2	5.2	NaN	5.1	NaN	5	5.9	5.1	5	NaN	NaN	NaN	5.1	5.3	5.4	5.1	5	5.6	5.2	5.1	5.2	5.1	5.2	5.2	5.9	5	5.2	NaN	5.1	5.4	5.7	5.5	5.8	5.4	5.8
6.2	NaN	NaN	NaN	NaN	NaN	NaN	6.5	NaN	NaN	NaN	NaN	NaN	NaN	NaN	NaN	NaN	NaN	NaN	NaN	NaN	NaN	NaN	NaN	NaN	NaN	NaN	NaN	NaN	NaN	NaN	NaN	9.2	NaN	NaN	NaN	NaN	NaN	NaN	NaN	NaN	NaN	NaN	NaN	NaN	NaN	NaN	NaN	NaN	NaN
6.7	NaN	NaN	NaN	NaN	NaN	NaN	6.4	NaN	NaN	NaN	NaN	NaN	NaN	NaN	NaN	NaN	NaN	NaN	NaN	NaN	NaN	NaN	NaN	NaN	NaN	NaN	NaN	NaN	NaN	NaN	NaN	8.6	NaN	NaN	NaN	NaN	NaN	NaN	NaN	NaN	NaN	NaN	NaN	NaN	NaN	NaN	NaN	NaN	NaN
5.8	5.4	NaN	NaN	NaN	5.6	NaN	NaN	NaN	NaN	5.2	NaN	5.6	5.4	NaN	NaN	NaN	NaN	NaN	NaN	NaN	NaN	NaN	6.3	5.8	8.6	5.8	5.5	NaN	NaN	5.4	7.7	6.1	8.1	NaN	NaN	NaN	NaN	NaN	5.3	NaN	5.7	6.2	NaN	NaN	NaN	NaN	NaN	NaN	NaN
NaN	NaN	6	5.5	6.1	5.5	NaN	NaN	NaN	NaN	NaN	NaN	NaN	NaN	NaN	NaN	NaN	NaN	NaN	NaN	NaN	8.5	7.8	NaN	NaN	NaN	NaN	6.8	NaN	NaN	NaN	8.3	6.7	NaN	NaN	NaN	NaN	NaN	NaN	NaN	NaN	NaN	NaN	NaN	NaN	6.2	NaN	5.8	NaN	NaN
6.2	NaN	5.1	5.1	5	6.6	5.7	5.8	NaN	NaN	5.9	5.1	NaN	NaN	5.7	6.8	6.7	NaN	5.1	NaN	5.1	5.9	5.1	5	NaN	NaN	NaN	5.1	5.8	5.4	6.3	5.6	5.6	5.2	5.8	5.6	5.1	6.1	5.2	7.1	5	5.2	NaN	5.1	5.4	6.6	5.5	5.8	5.4	5.8
6.2	NaN	5.1	5.1	5	5.9	7.9	6.1	NaN	NaN	5.9	5.2	NaN	NaN	5.1	5.2	5.2	NaN	5.1	NaN	5	5.9	5.1	5	NaN	NaN	NaN	5.1	5.3	5.4	5.7	5.9	7.6	5.8	6.2	6.1	6.4	6.1	5.2	5.9	5	6.4	NaN	5.1	5.4	5.7	6.1	5.8	5.4	5.8
6.2	NaN	5.1	5.1	5	5.9	5.7	5.8	NaN	NaN	5.9	5.2	NaN	NaN	5.1	5.2	5.2	NaN	5.1	4	5	5.9	5.1	5	NaN	NaN	NaN	5.1	5.3	5.4	5.1	5	5.6	5.2	5.1	5.2	5.1	5.2	5.2	5.9	5	5.2	NaN	5.1	5.4	5.7	5.5	5.8	5.4	5.8
NaN	NaN	NaN	NaN	NaN	NaN	NaN	NaN	NaN	NaN	NaN	NaN	NaN	NaN	NaN	NaN	NaN	NaN	NaN	NaN	NaN	NaN	NaN	NaN	NaN	NaN	NaN	NaN	NaN	NaN	NaN	NaN	NaN	NaN	NaN	NaN	NaN	NaN	NaN	NaN	NaN	NaN	NaN	NaN	NaN	NaN	NaN	NaN	NaN	NaN
6.3	6.6	5.1	5.1	5	5.9	NaN	7.2	NaN	NaN	6.7	5.5	5.8	5.2	5.1	5.2	5.2	NaN	6.1	NaN	5	5.9	6.8	6.8	6.2	5.4	5.8	6.3	6.9	NaN	5.6	6	6.1	5.3	5.1	5.2	5.1	5.2	5.6	5.9	5	6.1	7.5	5.1	NaN	5.8	7.3	5.8	5.7	6.9
5.4	5.4	NaN	NaN	NaN	5.2	NaN	NaN	NaN	NaN	5.2	NaN	5.6	5.1	NaN	NaN	NaN	NaN	NaN	NaN	NaN	NaN	NaN	5.5	5.4	5.4	5.8	NaN	NaN	NaN	5.4	5.6	7.4	5.4	NaN	NaN	NaN	NaN	NaN	5.3	NaN	5.7	5.6	NaN	NaN	NaN	NaN	NaN	NaN	NaN
6.2	NaN	5.1	5.1	5	NaN	5.7	5.8	NaN	NaN	NaN	5.1	NaN	NaN	5.1	5.2	5.2	NaN	5.1	4	5	5.9	6.1	5	NaN	NaN	NaN	5.1	5.3	5.4	5.1	5	5.6	5.2	5.1	5.2	5.1	NaN	5.2	5.9	5	5.2	NaN	NaN	5.4	5.7	5.5	5.8	5.4	NaN
NaN	NaN	NaN	NaN	NaN	NaN	NaN	NaN	NaN	NaN	NaN	NaN	NaN	NaN	NaN	NaN	NaN	NaN	NaN	NaN	NaN	NaN	NaN	NaN	NaN	NaN	NaN	NaN	NaN	NaN	NaN	NaN	NaN	NaN	NaN	NaN	NaN	NaN	NaN	5.5	NaN	5.9	NaN	NaN	NaN	NaN	NaN	NaN	NaN	NaN
6.2	NaN	5.1	5.1	5	5.9	NaN	6.5	NaN	NaN	5.9	5.3	NaN	NaN	5.1	5.2	5.2	NaN	5.1	NaN	5.5	5.9	5.1	5	NaN	NaN	NaN	5.1	5.8	NaN	5.1	5	5.6	5.2	5.1	5.2	5.1	5.2	5.2	5.9	5	5.2	NaN	5.1	NaN	5.7	5.5	5.8	6.3	5.8
6.2	NaN	5.1	5.1	5	5.9	5.7	5.8	NaN	NaN	5.9	5.2	NaN	NaN	5.1	5.2	5.2	NaN	5.1	NaN	5	5.9	5.1	5	NaN	NaN	NaN	5.1	5.3	5.4	5.1	5	5.6	5.2	5.1	5.2	5.1	5.2	5.2	5.9	5	5.2	NaN	5.1	5.4	5.7	5.5	5.8	5.4	5.8
NaN	NaN	NaN	NaN	NaN	NaN	NaN	NaN	NaN	NaN	NaN	NaN	NaN	NaN	NaN	NaN	NaN	NaN	NaN	NaN	NaN	8.1	8.4	NaN	NaN	NaN	NaN	NaN	NaN	NaN	NaN	NaN	NaN	NaN	NaN	NaN	NaN	NaN	NaN	NaN	NaN	NaN	NaN	NaN	NaN	NaN	NaN	NaN	NaN	NaN
6.2	NaN	5.1	5.1	5	NaN	NaN	5.8	NaN	5.1	5.9	5.3	NaN	NaN	5.1	5.2	5.2	NaN	5.1	NaN	5	5.9	5.1	5	NaN	NaN	NaN	5.1	5.8	NaN	5.1	5	5.6	5.2	5.1	5.2	5.1	5.2	5.2	5.9	5	5.2	NaN	5.1	NaN	5.7	5.5	NaN	5.4	5.8
NaN	NaN	5.1	5.1	5	NaN	NaN	NaN	NaN	NaN	NaN	5.2	NaN	NaN	5.1	5.2	5.2	NaN	5.1	NaN	5	NaN	5.9	5	NaN	NaN	NaN	5.1	5.3	NaN	5.5	6	NaN	5.2	5.1	5.2	5.1	NaN	5.2	NaN	5	5.2	NaN	NaN	NaN	NaN	NaN	NaN	NaN	NaN
6.2	NaN	5.1	5.1	5	NaN	NaN	7.1	NaN	NaN	5.9	5.3	NaN	NaN	5.4	5.2	5.2	NaN	5.1	NaN	5	5.9	5.1	5	NaN	NaN	NaN	5.1	5.8	NaN	6.5	7	6.5	5.9	6.8	6.6	6.8	6.2	5.2	5.9	5	6.6	NaN	5.1	5.4	6.5	7.8	5.8	5.4	6.6
6.2	NaN	NaN	NaN	NaN	NaN	NaN	6.1	NaN	NaN	NaN	NaN	NaN	NaN	NaN	NaN	NaN	NaN	NaN	NaN	NaN	NaN	NaN	NaN	NaN	NaN	NaN	NaN	NaN	NaN	NaN	NaN	8.7	NaN	NaN	NaN	NaN	NaN	NaN	NaN	NaN	NaN	NaN	NaN	NaN	NaN	NaN	NaN	NaN	NaN
7.1	NaN	NaN	NaN	NaN	NaN	NaN	6.9	NaN	NaN	NaN	NaN	NaN	NaN	NaN	NaN	NaN	NaN	NaN	NaN	NaN	NaN	NaN	NaN	NaN	NaN	NaN	NaN	NaN	NaN	NaN	NaN	8.8	NaN	NaN	NaN	NaN	NaN	NaN	NaN	NaN	NaN	NaN	NaN	NaN	NaN	NaN	NaN	NaN	NaN
6.5	NaN	NaN	NaN	NaN	NaN	NaN	6.8	NaN	NaN	NaN	NaN	NaN	NaN	NaN	NaN	NaN	NaN	NaN	NaN	NaN	NaN	NaN	NaN	NaN	NaN	NaN	NaN	NaN	NaN	NaN	NaN	9.5	NaN	NaN	NaN	NaN	NaN	NaN	NaN	NaN	NaN	NaN	NaN	NaN	NaN	NaN	NaN	NaN	NaN
6.8	5.4	5.1	5.1	5	5.2	NaN	7.1	NaN	NaN	5.6	NaN	5.6	5.3	NaN	NaN	NaN	5.6	5.1	NaN	5	NaN	5.1	5.3	5.4	5.4	5.8	5.2	5.7	5.4	5.4	5.6	5.6	5.4	5.1	NaN	NaN	NaN	5.4	5.6	NaN	5.5	5.6	NaN	NaN	6.3	6.9	5.8	5.4	NaN
5.9	5.4	5.1	5.1	5	6.7	6.7	6.4	NaN	NaN	5.7	5.5	5.6	5.4	5.1	5.4	5.6	6.5	7.2	NaN	5.2	5.9	7.1	7.8	7.7	5.4	7.2	5.5	6.1	NaN	6.9	7.2	5.6	5.3	5.1	5.4	5.4	5.2	6	6	5	5.9	5.9	5.1	5.4	5.7	5.9	5.8	5.4	5.8
NaN	NaN	5.1	5.1	5	NaN	5.7	NaN	NaN	NaN	NaN	5.2	NaN	NaN	5.1	5.2	5.2	NaN	5.1	NaN	5	NaN	5.1	5	NaN	NaN	NaN	5.1	5.3	5.4	5.1	5	5.6	5.2	5.1	5.2	5.1	5.2	5.2	NaN	5	5.2	NaN	5.1	5.4	NaN	5.5	NaN	5.4	NaN
5.8	6	5.3	5.1	5	5.4	5.7	5.8	NaN	NaN	5.5	5.2	5.6	5.4	5.3	5.8	5.5	NaN	6.2	NaN	5.3	8.6	6.5	6.7	5.6	8	8	5.2	6	NaN	6.6	8.4	5.6	7.5	7.3	6.6	7.2	6.8	5.5	7.2	5	7.7	8	6.7	5.4	5.7	5.5	5.8	5.4	5.8
NaN	NaN	NaN	NaN	NaN	NaN	NaN	NaN	NaN	NaN	NaN	NaN	NaN	NaN	NaN	NaN	NaN	NaN	NaN	NaN	NaN	NaN	NaN	NaN	NaN	NaN	NaN	NaN	NaN	NaN	NaN	5.5	NaN	NaN	5.7	NaN	NaN	NaN	NaN	NaN	NaN	NaN	NaN	NaN	NaN	NaN	NaN	NaN	NaN	NaN
6.7	NaN	NaN	NaN	NaN	NaN	NaN	6.9	NaN	NaN	NaN	NaN	NaN	NaN	NaN	NaN	NaN	NaN	NaN	NaN	NaN	NaN	NaN	NaN	NaN	NaN	NaN	NaN	NaN	NaN	NaN	NaN	8.4	NaN	NaN	NaN	NaN	NaN	NaN	NaN	NaN	NaN	NaN	NaN	NaN	NaN	NaN	NaN	NaN	NaN
NaN	NaN	NaN	NaN	NaN	NaN	NaN	NaN	NaN	NaN	NaN	NaN	NaN	NaN	NaN	NaN	NaN	NaN	NaN	NaN	NaN	NaN	NaN	NaN	NaN	NaN	NaN	NaN	NaN	NaN	NaN	NaN	NaN	NaN	5.5	NaN	NaN	NaN	NaN	NaN	NaN	NaN	NaN	NaN	NaN	NaN	NaN	NaN	NaN	NaN
NaN	NaN	NaN	NaN	NaN	NaN	NaN	NaN	NaN	NaN	NaN	NaN	NaN	NaN	NaN	NaN	NaN	NaN	NaN	NaN	NaN	NaN	NaN	NaN	NaN	NaN	NaN	NaN	NaN	NaN	NaN	NaN	NaN	NaN	NaN	NaN	NaN	NaN	NaN	NaN	NaN	NaN	NaN	NaN	NaN	NaN	NaN	NaN	NaN	NaN
6.3	NaN	NaN	NaN	NaN	NaN	NaN	7.1	NaN	NaN	NaN	NaN	NaN	NaN	NaN	NaN	NaN	NaN	NaN	NaN	NaN	NaN	NaN	NaN	NaN	NaN	NaN	NaN	NaN	NaN	NaN	NaN	8.4	NaN	NaN	NaN	NaN	NaN	NaN	NaN	NaN	NaN	NaN	NaN	NaN	NaN	NaN	NaN	NaN	NaN
6.8	5.4	NaN	NaN	NaN	5.6	NaN	NaN	NaN	NaN	5.6	NaN	5.6	5.4	NaN	NaN	NaN	NaN	NaN	NaN	NaN	NaN	NaN	5.5	5.4	7.4	5.8	5.5	NaN	NaN	5.4	5.6	8.3	5.4	NaN	NaN	NaN	NaN	NaN	5.3	NaN	5.7	5.6	NaN	NaN	NaN	NaN	NaN	NaN	NaN
6.2	NaN	5.1	5.1	5	NaN	NaN	5.8	NaN	NaN	NaN	5.1	NaN	NaN	NaN	NaN	NaN	NaN	5.1	NaN	5	NaN	5.1	5	NaN	NaN	NaN	7.6	5	5.4	NaN	NaN	7	NaN	5.1	NaN	NaN	NaN	5.2	5.9	NaN	5.2	NaN	NaN	NaN	5.7	5.5	5.8	5.4	NaN
NaN	NaN	NaN	NaN	NaN	NaN	NaN	NaN	NaN	NaN	NaN	NaN	NaN	NaN	NaN	NaN	NaN	NaN	NaN	4	NaN	NaN	NaN	NaN	NaN	NaN	NaN	NaN	NaN	NaN	NaN	NaN	NaN	NaN	NaN	NaN	NaN	NaN	NaN	NaN	NaN	NaN	NaN	NaN	NaN	NaN	NaN	NaN	NaN	NaN
6.2	5.4	5.1	5.1	5	5.2	5.7	5.8	NaN	NaN	5.2	5.4	5.6	5.5	5.1	5.2	5.2	5.6	5.1	NaN	5	5.9	5.1	5	NaN	5.4	NaN	5.1	5.4	5.4	5.3	5	6.2	5.4	5.1	5.2	5.1	NaN	5.2	5.9	5	5.5	5.6	NaN	5.4	5.7	5.1	5.8	5.4	NaN
6.2	5.4	5.1	5.1	5	5.2	5.7	6	NaN	NaN	5.2	5.8	5.6	5.5	NaN	NaN	NaN	5.6	5.1	NaN	5	5.9	5.1	5	NaN	5.4	NaN	5.1	5	5.4	5.4	5	6.2	5.4	5.6	NaN	5.1	NaN	5.2	5.9	5	5.7	5.6	NaN	5.4	5.7	5.1	5.8	5.4	NaN
6.2	NaN	5.1	5.1	5	NaN	NaN	5.8	NaN	NaN	NaN	5.1	NaN	NaN	NaN	NaN	NaN	NaN	5.1	NaN	5	NaN	5.1	5	NaN	NaN	NaN	5.1	5	5.4	NaN	NaN	5.9	NaN	5.3	NaN	NaN	NaN	5.2	5.9	NaN	5.2	NaN	NaN	NaN	5.7	5.1	5.8	5.4	NaN
NaN	5.4	NaN	NaN	NaN	5.4	NaN	NaN	NaN	NaN	5.2	NaN	5.6	6.3	NaN	NaN	NaN	NaN	NaN	NaN	NaN	NaN	NaN	6.1	5.9	5.4	6.5	NaN	NaN	NaN	5.6	5.8	5.6	5.4	NaN	NaN	NaN	NaN	NaN	6.2	NaN	5.7	5.7	NaN	NaN	NaN	NaN	NaN	NaN	NaN
6.3	NaN	5.2	5.1	5	7.8	7.8	6.9	NaN	NaN	6.2	5.3	NaN	NaN	5.1	5.2	5.2	NaN	5.1	NaN	5	5.9	5.1	5	NaN	NaN	NaN	5.1	5.7	5.4	6.1	5.7	7.1	5.2	5.1	5.2	5.1	5.2	5.2	5.9	5	5.2	NaN	5.1	5.4	5.7	6.4	5.8	5.6	6.8
6.7	NaN	NaN	NaN	NaN	NaN	NaN	7.8	NaN	NaN	NaN	NaN	NaN	NaN	NaN	NaN	NaN	NaN	NaN	NaN	NaN	NaN	NaN	NaN	NaN	NaN	NaN	NaN	NaN	NaN	NaN	NaN	8.3	NaN	NaN	NaN	NaN	NaN	NaN	NaN	NaN	NaN	NaN	NaN	NaN	NaN	NaN	NaN	NaN	NaN
NaN	NaN	5.1	5.1	5	5.9	5.7	6	NaN	NaN	5.9	5.3	NaN	NaN	5.1	5.2	5.2	NaN	5.1	NaN	5	5.9	5.1	5	NaN	NaN	NaN	5.1	5.8	NaN	5.3	5.5	5.6	5.2	5.1	5.2	5.1	5.2	7	5.9	5	5.6	NaN	5.1	5.4	5.7	5.5	5.8	5.4	5.8
5.6	5.9	NaN	NaN	NaN	6.1	NaN	NaN	NaN	NaN	5.2	NaN	5.7	5.2	NaN	NaN	NaN	NaN	NaN	NaN	NaN	NaN	NaN	5.7	6.3	5.5	6	7.3	NaN	NaN	5.4	7.5	6.5	5.4	NaN	NaN	NaN	NaN	NaN	5.3	NaN	5.8	5.6	NaN	NaN	NaN	NaN	NaN	NaN	NaN
NaN	NaN	5.1	5.1	5	5.9	5.7	5.8	NaN	NaN	NaN	5.2	NaN	NaN	NaN	NaN	NaN	NaN	5.1	NaN	5	5.9	5.1	5	NaN	NaN	NaN	5.1	5.3	5.4	5.5	6.1	5.7	5.2	6.9	NaN	5.1	NaN	5.2	5.9	5	NaN	NaN	NaN	5.4	5.7	5.1	5.8	5.4	NaN
6.2	NaN	5.1	5.1	5	NaN	5.8	5.8	NaN	NaN	NaN	5.2	NaN	NaN	5.1	5.2	5.2	NaN	5.5	NaN	5	5.9	5.1	5	NaN	NaN	NaN	5.1	6.2	5.4	5.9	6.5	5.6	5.7	6	6.2	6.8	NaN	5.8	6.2	5	8	NaN	NaN	5.4	6.2	5.1	5.8	5.4	NaN
NaN	NaN	5.1	5.1	5	5.9	5.7	5.8	NaN	NaN	5.9	5.7	NaN	NaN	5.1	5.5	5.3	NaN	5.9	NaN	5	5.9	6.5	6.6	5.8	NaN	NaN	5.1	5.8	NaN	6.1	6.6	5.6	5.5	6.1	5.2	5.1	5.2	5.2	5.9	5	5.2	NaN	5.1	NaN	5.7	5.5	5.8	NaN	6.3
NaN	NaN	NaN	NaN	NaN	NaN	NaN	NaN	NaN	NaN	NaN	NaN	NaN	NaN	NaN	NaN	NaN	NaN	NaN	NaN	NaN	NaN	NaN	NaN	NaN	NaN	NaN	NaN	NaN	NaN	NaN	NaN	NaN	NaN	NaN	NaN	NaN	NaN	NaN	NaN	NaN	NaN	NaN	NaN	NaN	NaN	NaN	NaN	NaN	NaN
NaN	NaN	NaN	NaN	NaN	5.3	NaN	NaN	NaN	NaN	5.3	NaN	NaN	NaN	NaN	NaN	NaN	NaN	NaN	5.5	NaN	NaN	NaN	NaN	NaN	5.4	NaN	6.2	NaN	NaN	NaN	NaN	NaN	NaN	NaN	NaN	NaN	NaN	NaN	NaN	NaN	NaN	NaN	NaN	NaN	NaN	NaN	NaN	NaN	NaN
NaN	NaN	4.7	4.7	4.6	NaN	NaN	NaN	NaN	NaN	NaN	NaN	NaN	NaN	NaN	NaN	NaN	NaN	4.7	NaN	4.6	NaN	4.7	NaN	NaN	NaN	NaN	4.9	4.6	NaN	NaN	NaN	NaN	NaN	NaN	NaN	NaN	NaN	4.8	NaN	NaN	NaN	NaN	NaN	NaN	NaN	4.7	NaN	NaN	NaN
NaN	NaN	NaN	NaN	5	NaN	NaN	NaN	NaN	NaN	NaN	NaN	NaN	NaN	NaN	NaN	NaN	NaN	5.1	NaN	5	NaN	5.1	5	NaN	NaN	NaN	5.1	NaN	NaN	5.1	5.8	NaN	NaN	NaN	NaN	NaN	NaN	6.1	NaN	5	NaN	NaN	NaN	NaN	NaN	NaN	NaN	NaN	NaN
NaN	4.1	NaN	NaN	NaN	NaN	NaN	NaN	NaN	NaN	NaN	NaN	NaN	4.1	NaN	NaN	NaN	NaN	NaN	NaN	NaN	NaN	NaN	NaN	4.1	NaN	NaN	NaN	NaN	NaN	4.4	5.1	NaN	4.7	NaN	NaN	NaN	NaN	NaN	NaN	NaN	4.4	4.7	NaN	NaN	NaN	NaN	NaN	NaN	NaN
5.9	5.4	NaN	NaN	NaN	5.3	NaN	NaN	NaN	NaN	5.6	NaN	6.4	5.5	NaN	NaN	NaN	NaN	NaN	NaN	NaN	NaN	NaN	5.5	5.9	6.4	6.4	7	NaN	NaN	5.4	6.1	5.6	5.4	NaN	NaN	NaN	NaN	NaN	5.3	NaN	5.8	6	NaN	NaN	NaN	NaN	NaN	NaN	NaN
6.2	NaN	5.1	5.1	5	5.9	6	5.8	NaN	NaN	5.9	5.2	NaN	NaN	5.1	5.2	5.2	NaN	5.1	NaN	5.1	7.4	5.1	5	NaN	NaN	NaN	5.1	5.3	5.4	5.1	5.6	5.6	5.2	5.4	5.2	5.1	5.2	6.3	6.7	5	5.2	NaN	5.1	5.4	5.7	5.5	5.8	5.4	5.8
NaN	NaN	NaN	NaN	NaN	NaN	NaN	NaN	NaN	NaN	NaN	NaN	NaN	NaN	NaN	NaN	NaN	NaN	NaN	NaN	NaN	NaN	NaN	4.3	NaN	4.1	NaN	4.3	NaN	NaN	NaN	4.8	NaN	4.4	NaN	NaN	NaN	NaN	NaN	4	NaN	4.4	4.4	NaN	NaN	NaN	NaN	NaN	NaN	NaN
NaN	NaN	NaN	NaN	NaN	NaN	NaN	NaN	NaN	NaN	NaN	NaN	NaN	NaN	NaN	NaN	NaN	NaN	NaN	NaN	NaN	NaN	NaN	NaN	NaN	NaN	NaN	5.6	NaN	NaN	NaN	NaN	NaN	NaN	NaN	NaN	NaN	NaN	NaN	NaN	NaN	NaN	NaN	NaN	NaN	NaN	NaN	NaN	NaN	NaN
NaN	NaN	NaN	NaN	NaN	NaN	NaN	NaN	NaN	NaN	NaN	NaN	NaN	NaN	NaN	NaN	NaN	NaN	NaN	NaN	NaN	NaN	NaN	NaN	NaN	NaN	NaN	NaN	NaN	NaN	NaN	NaN	NaN	NaN	NaN	NaN	NaN	NaN	NaN	NaN	NaN	NaN	NaN	NaN	NaN	NaN	NaN	NaN	NaN	NaN
NaN	4.2	4.1	4.1	4	4.8	NaN	NaN	NaN	NaN	NaN	NaN	4.9	4.3	NaN	NaN	NaN	NaN	NaN	NaN	NaN	NaN	NaN	5.2	4.5	5.3	4.7	4.1	NaN	NaN	4	5.5	4.4	4.6	NaN	NaN	NaN	NaN	NaN	5.5	NaN	5	5.2	NaN	NaN	4.7	NaN	4.8	NaN	NaN
NaN	NaN	NaN	NaN	NaN	NaN	NaN	NaN	NaN	NaN	NaN	NaN	NaN	NaN	NaN	NaN	NaN	NaN	NaN	NaN	NaN	NaN	NaN	4.2	NaN	NaN	NaN	NaN	NaN	NaN	NaN	4.7	NaN	NaN	NaN	NaN	NaN	NaN	NaN	NaN	NaN	NaN	NaN	NaN	NaN	NaN	NaN	NaN	NaN	NaN
NaN	NaN	NaN	NaN	NaN	NaN	NaN	NaN	NaN	NaN	NaN	NaN	4	NaN	NaN	NaN	NaN	NaN	NaN	NaN	NaN	NaN	NaN	5.5	NaN	4.5	4.2	NaN	NaN	NaN	NaN	5.1	4.1	4.3	NaN	NaN	NaN	NaN	NaN	NaN	NaN	4.1	4.1	NaN	NaN	NaN	NaN	NaN	NaN	NaN
6.2	NaN	5.1	5.1	5	NaN	NaN	5.8	NaN	NaN	5.9	5.3	NaN	NaN	5.1	5.2	5.2	NaN	5.1	NaN	5	5.9	5.1	5	NaN	NaN	NaN	5.1	5.8	NaN	5.1	5	5.6	5.2	5.1	5.2	5.1	5.2	5.7	5.9	5	5.2	NaN	5.1	NaN	5.7	5.7	NaN	5.4	5.8
NaN	NaN	NaN	NaN	NaN	NaN	NaN	NaN	NaN	NaN	NaN	NaN	4	NaN	NaN	NaN	NaN	NaN	NaN	4	NaN	NaN	NaN	NaN	NaN	NaN	4.2	NaN	NaN	NaN	NaN	5.4	4	NaN	NaN	NaN	NaN	NaN	NaN	NaN	NaN	4.1	4.8	NaN	NaN	NaN	NaN	NaN	NaN	NaN
NaN	NaN	5.9	5.9	5.8	5.9	6.4	5.8	NaN	NaN	5.9	5.4	NaN	NaN	5.5	5.6	5.5	NaN	5.1	6	5.9	5.9	5.6	6.1	NaN	NaN	NaN	5.1	5.8	NaN	6	5.5	5.6	5.2	5.1	NaN	5.7	6	5.8	6.1	5	5.3	NaN	6.1	NaN	5.7	5.5	5.8	5.4	5.8
NaN	NaN	NaN	NaN	5	NaN	NaN	NaN	NaN	NaN	NaN	NaN	NaN	NaN	NaN	NaN	NaN	NaN	NaN	NaN	NaN	NaN	NaN	NaN	NaN	NaN	NaN	5.1	NaN	NaN	NaN	NaN	NaN	NaN	NaN	NaN	NaN	NaN	NaN	NaN	NaN	NaN	NaN	NaN	6.1	NaN	NaN	NaN	NaN	NaN
NaN	NaN	NaN	NaN	NaN	NaN	NaN	NaN	NaN	NaN	NaN	5.1	NaN	NaN	NaN	NaN	NaN	NaN	NaN	NaN	5.2	NaN	NaN	NaN	NaN	NaN	NaN	NaN	NaN	NaN	NaN	NaN	NaN	NaN	NaN	NaN	NaN	NaN	NaN	NaN	NaN	NaN	NaN	NaN	NaN	NaN	NaN	NaN	NaN	NaN
NaN	NaN	5.1	5.1	5	5.9	5.7	5.8	NaN	NaN	5.9	5.2	NaN	NaN	5.1	5.2	5.2	NaN	5.6	4	5	5.9	6.4	6	NaN	NaN	NaN	5.1	5.3	5.4	5.3	6.4	5.8	5.2	5.4	5.2	5.1	5.2	5.2	5.9	5	5.9	NaN	5.1	5.4	5.7	5.1	5.8	5.4	5.8
5.6	6.2	NaN	NaN	NaN	4.4	NaN	NaN	NaN	NaN	4.5	NaN	4.4	4.7	NaN	NaN	NaN	NaN	NaN	NaN	NaN	NaN	NaN	4.8	4.6	NaN	5	NaN	NaN	NaN	4.4	5.8	5.7	6.6	NaN	NaN	NaN	NaN	NaN	4.1	NaN	4.5	4.7	NaN	NaN	NaN	NaN	NaN	NaN	NaN
4	NaN	NaN	NaN	NaN	NaN	NaN	NaN	NaN	NaN	NaN	NaN	4	NaN	NaN	NaN	NaN	NaN	NaN	NaN	NaN	NaN	NaN	NaN	NaN	4.2	NaN	4.2	NaN	NaN	NaN	4.1	NaN	NaN	NaN	NaN	NaN	NaN	NaN	NaN	NaN	4.2	4.1	NaN	NaN	NaN	NaN	NaN	NaN	NaN
4.1	NaN	NaN	NaN	NaN	4.2	NaN	NaN	NaN	NaN	NaN	NaN	4.4	NaN	NaN	NaN	NaN	NaN	NaN	4	NaN	NaN	NaN	4.6	4.4	4.6	4.8	5.4	NaN	NaN	NaN	5.2	4.2	4.4	NaN	NaN	NaN	NaN	NaN	4.4	NaN	4.4	4.3	NaN	NaN	NaN	NaN	NaN	NaN	NaN
NaN	NaN	NaN	NaN	NaN	NaN	NaN	NaN	NaN	NaN	NaN	NaN	NaN	NaN	NaN	NaN	NaN	NaN	NaN	NaN	NaN	NaN	NaN	NaN	NaN	NaN	NaN	NaN	NaN	NaN	NaN	NaN	NaN	NaN	NaN	NaN	NaN	NaN	NaN	NaN	NaN	NaN	4.3	NaN	NaN	NaN	NaN	NaN	NaN	NaN
7	NaN	6.5	5.9	6.6	7.3	8.1	7.3	NaN	NaN	6.8	6.5	NaN	NaN	5.6	6.9	7.2	NaN	7.6	NaN	5.3	7.5	8.1	8.1	NaN	NaN	NaN	6.4	7.5	NaN	7.8	NaN	5.6	5.2	5.6	6.2	6.5	5.2	8.4	7.5	6.1	7.3	NaN	5.7	5.4	NaN	5.6	6.7	6.9	7.7
6.2	NaN	5.1	5.1	5	5.9	5.7	5.8	NaN	NaN	5.9	5.3	NaN	NaN	5.1	5.2	5.2	NaN	5.1	NaN	5	5.9	5.1	5	NaN	NaN	NaN	5.1	5.8	NaN	5.3	6.2	5.6	5.2	5.1	7.7	5.1	5.2	5.7	5.9	5	5.2	NaN	5.1	NaN	6.5	5.5	5.8	5.4	5.8
NaN	NaN	5.1	5.1	5	5.9	5.7	5.8	NaN	NaN	NaN	5.3	NaN	NaN	5.1	5.6	5.6	NaN	5.3	NaN	5	NaN	5.1	5.1	NaN	NaN	NaN	5.1	5.8	NaN	6.1	6.9	5.6	5.2	5.6	5.2	5.1	5.2	6	5.9	5	6.5	NaN	5.1	5.4	6.8	5.5	5.8	5.4	5.8
NaN	NaN	5.1	5.1	5	NaN	NaN	NaN	NaN	NaN	NaN	5.2	NaN	NaN	5.1	5.2	5.2	NaN	5.1	NaN	5	NaN	5.1	5	NaN	NaN	NaN	5.1	NaN	NaN	5.3	6.5	NaN	5.2	5.3	5.2	5.1	5.2	5.4	NaN	5	6.1	NaN	5.1	5.4	6.5	5.5	NaN	5.4	NaN
7.1	NaN	5.1	5.1	5	NaN	NaN	6.8	NaN	NaN	NaN	5.1	NaN	NaN	NaN	NaN	NaN	NaN	6.2	NaN	5	NaN	5.1	5	NaN	NaN	NaN	5.1	6.6	7	NaN	NaN	6.7	NaN	5.6	NaN	NaN	NaN	5.2	5.9	NaN	5.7	NaN	NaN	NaN	5.7	7	5.8	5.4	NaN
6.2	NaN	5.1	5.1	5	8.4	8.1	6.7	NaN	NaN	5.9	5.3	NaN	NaN	5.5	5.3	5.2	NaN	5.6	NaN	5	5.9	5.1	5	NaN	NaN	NaN	5.1	6.6	NaN	6.3	6.7	6.2	5.2	5.1	5.2	5.1	5.2	5.2	6.1	5	5.8	NaN	5.1	NaN	5.7	7.2	5.8	5.4	5.8
NaN	NaN	NaN	NaN	NaN	NaN	NaN	NaN	NaN	NaN	NaN	NaN	NaN	NaN	NaN	NaN	NaN	NaN	NaN	NaN	NaN	NaN	NaN	NaN	NaN	NaN	NaN	NaN	NaN	NaN	NaN	NaN	NaN	NaN	NaN	NaN	NaN	NaN	NaN	NaN	NaN	NaN	NaN	NaN	NaN	NaN	NaN	NaN	NaN	NaN
6.2	NaN	5.1	5.1	5	NaN	NaN	5.8	NaN	NaN	NaN	NaN	NaN	NaN	NaN	NaN	NaN	NaN	5.1	NaN	5	NaN	5.1	5	NaN	NaN	NaN	5.1	5	5.4	NaN	NaN	5.6	NaN	7.8	NaN	NaN	NaN	5.2	5.9	NaN	5.5	NaN	NaN	NaN	5.7	5.5	5.8	5.4	NaN
6.2	NaN	5.2	5.1	5	NaN	NaN	5.8	NaN	NaN	NaN	5.5	NaN	NaN	NaN	NaN	NaN	NaN	5.8	NaN	5	NaN	6.2	6	NaN	NaN	NaN	5.1	5.7	5.4	NaN	NaN	5.6	NaN	6.2	NaN	NaN	NaN	5.7	6	NaN	5.9	NaN	NaN	NaN	5.7	5.1	5.8	5.4	NaN
6.2	NaN	5.1	5.1	5	5.9	5.7	5.8	NaN	NaN	5.9	5.1	NaN	NaN	5.1	5.2	5.2	NaN	5.1	NaN	5	5.9	5.1	5	NaN	NaN	NaN	5.1	5.8	5.4	5.1	5	5.6	5.2	5.1	5.2	5.1	5.2	5.2	5.9	5	5.2	NaN	5.1	5.4	5.7	5.1	5.8	5.4	5.8
5.8	5.4	5.1	5.1	5	5.2	NaN	6.2	NaN	NaN	5.4	NaN	5.6	5.2	NaN	NaN	NaN	NaN	5.1	NaN	5	NaN	5.1	5.2	5.4	5.7	5.8	5.2	5.7	5.4	5.6	5.9	5.6	5.4	5.3	NaN	NaN	NaN	5.2	5.6	NaN	5.5	5.9	NaN	NaN	6.3	5.5	5.8	6.7	NaN
6.6	8	5.1	5.1	5	NaN	8	7.2	NaN	NaN	7.3	6.1	6.4	6.2	6.1	8.4	7.9	NaN	6.5	NaN	5.4	6	6.9	7.1	7.1	5.4	5.8	7	8.9	NaN	7.6	7.7	6.4	5.3	5.1	5.2	5.1	5.2	5.6	6.4	7.4	5.8	5.8	5.1	NaN	8	6.5	7.4	7.7	NaN
6.2	NaN	5.1	5.1	5	NaN	7.4	6.6	NaN	NaN	5.9	5.2	NaN	NaN	5.1	5.2	5.2	NaN	5.1	NaN	5	5.9	5.1	5	NaN	NaN	NaN	5.1	5.8	NaN	5.2	6.3	5.9	5.2	5.1	5.3	5.5	5.2	5.2	5.9	5	5.2	NaN	5.1	5.4	5.7	7	5.8	5.4	5.8
5.6	5.4	NaN	NaN	NaN	5.2	NaN	NaN	NaN	NaN	5.2	NaN	5.6	5.4	NaN	NaN	NaN	NaN	NaN	NaN	NaN	NaN	NaN	9.5	7.4	5.4	9.1	5.5	NaN	NaN	5.4	6.3	5.6	5.4	NaN	NaN	NaN	NaN	NaN	5.3	NaN	5.7	6.5	NaN	NaN	NaN	NaN	NaN	NaN	NaN
6.2	NaN	5.1	5.1	5	5.9	5.7	5.8	NaN	NaN	NaN	5.3	NaN	NaN	NaN	NaN	NaN	NaN	5.1	NaN	5	5.9	5.1	5	NaN	NaN	NaN	5.1	5.3	5.4	5.1	5.4	5.6	5.9	8	NaN	5.7	NaN	5.2	5.9	5	5.6	NaN	NaN	5.4	5.7	5.5	5.8	5.4	NaN
5.6	5.4	5.1	5.1	5	5.2	5.7	5.8	NaN	NaN	5.3	5.1	5.6	5.4	5.1	5.2	5.2	NaN	5.1	NaN	5	5.9	5.1	5.4	5.4	5.4	5.8	5.4	5.8	NaN	5.4	5.5	5.6	6.1	7.9	NaN	5.2	NaN	5.2	5.3	5	5.6	5.6	5.1	5.4	5.8	5.5	5.8	5.4	5.8
6.2	NaN	5.1	5.1	5	5.9	5.7	5.8	NaN	NaN	5.9	5.4	NaN	NaN	5.1	5.2	5.2	NaN	5.1	NaN	5	5.9	5.1	5	5.8	NaN	NaN	5.1	5.8	NaN	5.2	5.5	5.6	6.1	7.6	5.2	5.2	5.3	5.2	5.9	5	5.4	NaN	5.1	5.4	5.7	5.5	5.8	5.4	5.8
5.7	5.4	5.1	5.1	5	5.3	5.7	5.8	NaN	NaN	5.3	5.5	5.6	5.4	5.1	5.2	5.2	NaN	5.1	NaN	5	5.9	5.1	5.4	5.4	5.4	5.8	5.4	5.8	NaN	5.3	5.4	5.6	6.4	7.5	5.2	5.2	5.2	5.2	5.3	5	5.5	5.6	5.1	5.4	5.7	5.5	5.8	5.4	5.8
6.2	NaN	6.3	6.2	5.7	5.9	NaN	5.8	NaN	NaN	5.9	5.3	NaN	NaN	5.1	5.2	5.2	NaN	5.1	NaN	6.8	7.1	6.1	5	NaN	NaN	NaN	5.1	5.8	NaN	5.1	6.2	5.6	5.2	5.1	5.2	5.1	5.2	5.2	6.3	5	5.2	NaN	5.1	NaN	5.7	5.5	5.8	5.4	5.8
6.2	NaN	5.1	5.1	5	5.4	7	6.1	NaN	NaN	5.9	5.2	NaN	NaN	5.4	6.7	5.9	NaN	7.5	5.4	5	5.9	5.1	5	NaN	NaN	NaN	5.1	NaN	5.4	5.5	6.1	5.6	5.3	5.1	5.2	5.2	5.2	5.2	5.7	5	5.2	NaN	5.1	5.4	6.4	5.5	5.8	5.4	5.8
6.2	NaN	5.5	5.1	5	NaN	NaN	5.8	NaN	NaN	NaN	5.1	NaN	NaN	NaN	NaN	NaN	NaN	5.1	NaN	5	NaN	5.1	5	NaN	NaN	NaN	5.1	5	5.4	NaN	NaN	8.6	NaN	5.1	NaN	NaN	NaN	5.2	5.9	NaN	5.2	NaN	NaN	NaN	5.7	5.5	5.9	5.5	NaN
6.2	NaN	NaN	NaN	NaN	NaN	NaN	6.8	NaN	NaN	NaN	NaN	NaN	NaN	NaN	NaN	NaN	NaN	NaN	5.7	NaN	NaN	NaN	NaN	NaN	NaN	NaN	NaN	NaN	NaN	NaN	NaN	9	NaN	NaN	NaN	NaN	NaN	NaN	NaN	NaN	NaN	NaN	NaN	NaN	NaN	NaN	NaN	NaN	NaN
6.3	5.4	NaN	NaN	NaN	6.7	NaN	NaN	NaN	NaN	5.5	NaN	5.6	5.1	NaN	NaN	NaN	NaN	NaN	NaN	NaN	NaN	NaN	6.9	6.4	5.4	5.8	6.8	NaN	NaN	7	7.8	5.6	6.4	NaN	NaN	NaN	NaN	NaN	6.4	NaN	5.8	6.3	NaN	NaN	NaN	NaN	NaN	NaN	NaN
NaN	NaN	NaN	5.1	5	6.1	NaN	6.4	NaN	NaN	NaN	5.5	NaN	NaN	5.1	5.4	5.4	NaN	5.2	NaN	5	5.9	5.1	5	NaN	NaN	NaN	5.1	6.2	NaN	6.4	6.8	5.6	5.8	6.9	5.2	5.1	5.2	5.9	5.9	5	5.6	NaN	5.1	NaN	5.7	5.5	5.8	5.4	5.9
6.2	NaN	5.1	5.1	5	5.9	5.7	6.6	NaN	NaN	5.9	5.2	NaN	NaN	5.2	5.4	5.3	NaN	5.1	NaN	5	5.9	5.1	5	NaN	NaN	NaN	5.1	5.5	5.4	5.2	5.5	7.8	5.2	5.1	5.2	5.1	5.2	5.2	5.9	5	5.2	NaN	5.1	5.4	5.7	5.5	5.8	5.4	5.8
NaN	NaN	NaN	NaN	NaN	NaN	NaN	NaN	NaN	NaN	NaN	NaN	NaN	NaN	NaN	NaN	NaN	NaN	NaN	NaN	NaN	NaN	NaN	NaN	NaN	NaN	5.8	NaN	NaN	NaN	NaN	NaN	NaN	NaN	NaN	NaN	NaN	NaN	NaN	NaN	NaN	NaN	5.6	NaN	NaN	NaN	NaN	NaN	NaN	NaN
NaN	NaN	5.1	5.1	5	NaN	5.7	NaN	NaN	NaN	NaN	5.2	NaN	NaN	5.1	5.2	5.2	NaN	5.1	NaN	5	NaN	5.1	5	NaN	NaN	NaN	5.1	5.3	5.4	5.1	5	5.6	5.2	5.1	5.2	5.1	5.2	5.2	NaN	5	5.2	NaN	5.1	5.4	5.7	5.1	NaN	5.4	NaN
6.2	NaN	5.1	5.1	5	5.9	NaN	5.8	NaN	NaN	5.9	5.3	NaN	NaN	5.1	5.2	5.2	NaN	5.5	NaN	5.5	8.3	6.4	5.5	NaN	NaN	NaN	5.1	5.8	NaN	6.6	7.2	5.6	5.2	6.2	5.4	5.7	5.8	7.6	7.3	5	7.8	NaN	6.5	NaN	5.7	5.5	5.8	5.4	5.8
NaN	NaN	5.1	5.1	5	5.6	5.7	NaN	NaN	NaN	NaN	5.2	NaN	NaN	5.1	5.2	5.2	NaN	5.1	NaN	5	NaN	5.1	5	NaN	NaN	NaN	5.1	5.4	5.4	5.9	5.7	6.1	5.2	5.1	5.2	5.1	NaN	5.2	NaN	5	6.5	NaN	NaN	5.4	NaN	5.1	NaN	5.4	NaN
NaN	NaN	NaN	NaN	NaN	NaN	NaN	NaN	NaN	NaN	NaN	NaN	NaN	NaN	NaN	NaN	NaN	NaN	NaN	NaN	NaN	NaN	NaN	NaN	NaN	NaN	NaN	NaN	NaN	NaN	5.1	NaN	5.7	NaN	NaN	NaN	NaN	NaN	NaN	NaN	NaN	5.4	NaN	NaN	NaN	NaN	NaN	NaN	NaN	NaN
NaN	NaN	5.1	5.1	5	6	NaN	NaN	NaN	NaN	NaN	5.4	NaN	NaN	5.1	5.2	5.2	NaN	5.1	NaN	5	NaN	5.1	5	NaN	NaN	NaN	5.1	NaN	NaN	5.1	5.5	6.4	5.2	5.1	5.2	5.1	5.2	5.2	NaN	5	5.2	NaN	5.1	NaN	NaN	5.5	NaN	5.4	NaN
NaN	NaN	NaN	NaN	NaN	NaN	NaN	NaN	NaN	NaN	NaN	NaN	NaN	NaN	NaN	NaN	NaN	NaN	NaN	NaN	NaN	6.9	5.7	NaN	NaN	NaN	NaN	NaN	NaN	NaN	NaN	8	NaN	NaN	NaN	NaN	NaN	NaN	NaN	NaN	NaN	NaN	NaN	NaN	NaN	NaN	NaN	NaN	NaN	NaN
NaN	NaN	NaN	NaN	NaN	6.3	NaN	NaN	NaN	NaN	NaN	NaN	NaN	NaN	NaN	NaN	NaN	NaN	NaN	NaN	NaN	NaN	NaN	NaN	NaN	NaN	NaN	NaN	NaN	NaN	NaN	NaN	NaN	NaN	NaN	NaN	NaN	NaN	NaN	NaN	NaN	NaN	NaN	NaN	NaN	NaN	NaN	NaN	NaN	NaN
6.2	NaN	5.1	5.1	5	5.9	5.7	5.8	NaN	NaN	5.9	5.7	NaN	NaN	5.8	6.2	6.1	NaN	6	NaN	5	5.9	6.2	5.6	NaN	NaN	NaN	5.1	5.8	NaN	6.1	5	5.6	5.2	5.7	5.6	5.1	5.2	5.2	5.9	5.4	5.6	NaN	5.1	5.4	5.7	5.5	5.8	5.4	5.8
6.3	NaN	5.2	5.1	5	5.9	5.7	6	NaN	NaN	5.9	5.2	NaN	NaN	5.1	5.2	5.2	NaN	5.1	4	5	5.9	5.1	5	NaN	NaN	NaN	5.1	5.3	5.4	5.1	5	7.6	5.2	5.1	5.2	5.1	5.2	5.2	5.9	5	5.2	NaN	5.1	5.4	5.7	5.5	5.8	5.4	5.8
NaN	NaN	NaN	NaN	NaN	NaN	NaN	NaN	NaN	NaN	NaN	NaN	NaN	NaN	NaN	NaN	NaN	NaN	NaN	NaN	NaN	8.3	6.8	NaN	NaN	NaN	NaN	NaN	NaN	NaN	NaN	8.3	NaN	NaN	NaN	NaN	NaN	NaN	NaN	NaN	NaN	NaN	NaN	NaN	NaN	NaN	NaN	NaN	NaN	NaN
NaN	NaN	NaN	NaN	NaN	5.3	NaN	NaN	NaN	NaN	NaN	NaN	NaN	NaN	NaN	NaN	NaN	NaN	NaN	NaN	NaN	6.6	NaN	NaN	NaN	NaN	NaN	NaN	NaN	NaN	NaN	NaN	NaN	NaN	NaN	NaN	NaN	NaN	NaN	NaN	NaN	NaN	NaN	NaN	NaN	NaN	NaN	NaN	NaN	NaN
6.2	NaN	5.1	5.1	5	5.9	5.7	5.8	NaN	NaN	5.9	5.3	NaN	NaN	5.1	5.2	5.2	NaN	5.1	NaN	5	5.9	5.1	5	NaN	NaN	NaN	5.1	5.8	NaN	6.3	7.3	5.6	5.2	5.1	5.2	5.1	5.2	5.2	5.9	5	5.5	NaN	5.1	5.4	5.7	5.5	5.8	5.4	5.8
5.4	5.4	NaN	NaN	NaN	5.2	NaN	NaN	NaN	NaN	5.2	NaN	5.6	5.1	NaN	NaN	NaN	NaN	NaN	4	NaN	NaN	NaN	5.5	NaN	5.4	5.8	NaN	NaN	NaN	5.4	5.6	5.6	5.4	NaN	NaN	NaN	NaN	NaN	5.4	NaN	5.7	5.6	NaN	NaN	NaN	NaN	NaN	NaN	NaN
5.6	5.4	NaN	NaN	NaN	5.2	NaN	NaN	NaN	NaN	5.2	NaN	5.6	5.4	NaN	NaN	NaN	NaN	NaN	NaN	NaN	NaN	NaN	5.5	5.4	5.4	5.8	5.5	NaN	NaN	5.4	5.6	5.6	5.4	NaN	NaN	NaN	NaN	NaN	5.3	NaN	5.7	5.6	NaN	NaN	NaN	NaN	NaN	NaN	NaN
NaN	NaN	NaN	NaN	NaN	NaN	NaN	NaN	NaN	NaN	NaN	NaN	NaN	NaN	NaN	NaN	NaN	NaN	NaN	NaN	NaN	NaN	NaN	NaN	5.4	NaN	NaN	NaN	NaN	NaN	NaN	6	NaN	NaN	NaN	NaN	NaN	NaN	NaN	NaN	NaN	NaN	NaN	NaN	NaN	NaN	NaN	NaN	NaN	NaN
NaN	NaN	NaN	NaN	NaN	4	NaN	NaN	NaN	NaN	NaN	NaN	NaN	NaN	NaN	NaN	NaN	NaN	NaN	NaN	NaN	NaN	NaN	NaN	NaN	4.2	NaN	NaN	NaN	NaN	NaN	5	NaN	NaN	NaN	NaN	NaN	NaN	NaN	NaN	NaN	4.4	4.4	NaN	NaN	NaN	NaN	NaN	NaN	NaN
NaN	4.1	NaN	NaN	NaN	NaN	NaN	NaN	NaN	NaN	NaN	NaN	4	NaN	NaN	NaN	NaN	NaN	NaN	4	NaN	NaN	NaN	NaN	NaN	5.5	4.2	4.2	NaN	NaN	NaN	NaN	4.1	NaN	NaN	NaN	NaN	NaN	NaN	NaN	NaN	4.2	4.2	NaN	NaN	NaN	NaN	NaN	NaN	NaN
5.7	5.4	NaN	NaN	NaN	5.8	NaN	NaN	NaN	NaN	5.2	NaN	6.2	6	NaN	NaN	NaN	NaN	NaN	NaN	NaN	NaN	NaN	5.5	5.8	6.3	6.6	6.1	NaN	NaN	5.4	6.3	6.2	5.4	NaN	NaN	NaN	NaN	NaN	5.3	NaN	6.5	6.2	NaN	NaN	NaN	NaN	NaN	NaN	NaN
6.2	NaN	5.1	5.1	5	NaN	7.3	6.1	NaN	NaN	5.9	5.4	NaN	NaN	5.3	5.3	5.2	NaN	5.1	NaN	5	5.9	5.1	5	NaN	NaN	NaN	5.1	5.8	NaN	6.2	6.1	6	5.3	5.6	5.3	5.6	5.2	5.2	5.9	5	5.2	NaN	5.1	5.4	5.7	6.4	5.8	5.4	5.8
8.4	NaN	5.1	5.1	5	NaN	5.9	6.4	NaN	NaN	NaN	5.2	NaN	NaN	5.1	5.2	5.2	NaN	5.1	4	5	5.9	5.1	5	NaN	NaN	NaN	5.1	5.3	5.4	5.7	6.4	7.4	5.2	5.1	5.2	5.6	NaN	5.2	5.9	5	5.3	NaN	NaN	5.4	6.5	5.5	5.8	5.4	NaN
NaN	NaN	NaN	NaN	NaN	NaN	NaN	NaN	NaN	NaN	NaN	NaN	NaN	NaN	NaN	NaN	NaN	NaN	NaN	NaN	NaN	NaN	NaN	NaN	NaN	NaN	NaN	NaN	NaN	NaN	NaN	NaN	NaN	NaN	NaN	NaN	NaN	NaN	NaN	NaN	NaN	NaN	NaN	NaN	NaN	NaN	NaN	NaN	NaN	NaN
7.1	NaN	5.1	5.1	5	NaN	8.9	7.6	NaN	NaN	NaN	5.3	NaN	NaN	5.1	5.2	5.2	NaN	5.1	NaN	5	5.9	5.1	5	NaN	NaN	NaN	5.1	5.5	5.4	5.5	5	8	5.2	5.1	5.2	5.1	NaN	5.2	5.9	5	5.2	NaN	NaN	5.4	5.7	7	5.8	5.4	NaN
NaN	NaN	NaN	NaN	NaN	6.4	NaN	NaN	NaN	NaN	NaN	NaN	NaN	NaN	NaN	NaN	NaN	NaN	NaN	NaN	NaN	NaN	NaN	NaN	NaN	NaN	NaN	NaN	NaN	NaN	NaN	NaN	NaN	NaN	NaN	NaN	NaN	NaN	NaN	NaN	NaN	NaN	NaN	NaN	NaN	NaN	NaN	NaN	NaN	NaN
8.8	NaN	5.1	5.1	5	NaN	NaN	8.5	NaN	NaN	NaN	5.2	NaN	NaN	NaN	NaN	NaN	NaN	5.1	NaN	5	NaN	5.1	5	NaN	NaN	NaN	5.1	5	5.4	NaN	NaN	8.6	NaN	5.6	NaN	NaN	NaN	5.2	6	NaN	5.2	NaN	NaN	NaN	6.3	7.2	5.8	5.4	NaN
6.3	NaN	5.1	5.1	5	NaN	7.8	6.4	NaN	NaN	NaN	5.6	NaN	NaN	5.4	5.3	5.5	NaN	5.1	NaN	5	5.9	6.1	5	NaN	NaN	NaN	5.1	6.1	5.4	5.7	5.1	7.5	5.2	5.1	5.6	5.3	NaN	5.2	5.9	5	5.2	NaN	NaN	5.4	5.7	6.5	5.8	5.5	NaN
6.5	NaN	5.1	5.1	5	NaN	8.1	6.8	NaN	NaN	NaN	5.9	NaN	NaN	5.6	5.8	5.8	NaN	5.1	NaN	5	5.9	5.1	5	NaN	NaN	NaN	5.1	5.8	5.4	6.4	5.3	8.1	5.2	5.1	5.7	5.2	NaN	5.2	6.1	5	5.2	NaN	NaN	5.4	5.7	6.8	5.8	5.4	NaN
6.6	NaN	5.1	5.1	5	NaN	8.5	7.1	NaN	NaN	NaN	5.8	NaN	NaN	5.4	5.8	5.8	NaN	5.1	NaN	5	5.9	5.6	5	NaN	NaN	NaN	5.1	5.9	5.4	5.9	5.3	8.3	5.2	5.1	5.6	5.5	NaN	5.2	6.1	5	5.2	NaN	NaN	5.4	5.7	6.7	5.8	5.4	NaN
6.8	NaN	5.1	5.1	5	7	8.3	7.1	NaN	NaN	6.4	5.8	NaN	NaN	5.2	5.6	5.9	NaN	5.1	NaN	5	5.9	5.3	5	NaN	NaN	NaN	5.1	5.3	5.4	5.5	5.4	7.9	5.2	5.2	5.6	5.4	5.3	5.2	5.9	5	5.2	NaN	5.1	5.4	5.7	7	5.8	5.6	6.6
7	NaN	5.1	5.1	5	NaN	7.2	7.8	NaN	NaN	6.1	5.2	NaN	NaN	5.1	5.2	5.2	NaN	5.1	NaN	5	5.9	5.1	5	NaN	NaN	NaN	5.1	5.8	NaN	5.1	6.6	6.7	5.5	6.3	5.4	5.5	5.8	5.2	5.9	5	5.6	NaN	5.1	5.4	5.7	5.6	5.8	6.2	6.8
7.5	NaN	NaN	5.1	5	NaN	7.4	8.3	NaN	NaN	NaN	5.2	NaN	NaN	5.1	5.2	5.2	NaN	5.1	NaN	5	5.9	5.1	5	NaN	NaN	NaN	5.1	6	5.4	6.1	6.3	7.8	5.8	5.7	5.9	6	NaN	5.2	5.9	5	5.2	NaN	NaN	5.4	5.7	6.3	5.8	5.9	NaN
7.4	NaN	5.1	5.1	5	NaN	8.5	7.3	NaN	NaN	NaN	5.3	NaN	NaN	5.1	5.2	5.3	NaN	5.1	NaN	5	5.9	5.1	5	NaN	NaN	NaN	5.1	5.6	5.4	5.4	5.2	8.1	5.2	5.3	5.3	5.3	NaN	5.2	5.9	5	5.2	NaN	NaN	5.4	5.7	6.9	5.8	5.4	NaN
6.6	NaN	5.1	5.1	5	6.3	8.2	7.2	NaN	NaN	6.2	5.7	NaN	NaN	5.1	5.5	5.7	NaN	5.1	NaN	5	5.9	5.1	5	NaN	NaN	NaN	5.1	5.7	5.4	5.5	5.1	8	5.2	5.3	6	5.9	5.8	5.2	5.9	5	5.2	NaN	5.1	5.4	5.7	7.1	5.8	5.4	6.3
6.2	NaN	5.1	5.1	5	5.9	6	5.8	NaN	NaN	5.9	5.3	NaN	NaN	5.2	5.2	5.2	NaN	5.1	NaN	5	5.9	5.1	5	NaN	NaN	NaN	5.1	5.8	NaN	5.1	5	6.7	5.5	5.8	5.2	5.5	5.2	5.2	5.9	5	5.2	NaN	5.1	5.4	5.7	5.5	5.8	5.4	5.8
6.2	NaN	5.1	5.1	5	NaN	7.9	6.1	NaN	NaN	5.9	5.4	NaN	NaN	5.5	5.4	5.5	NaN	5.1	NaN	5	5.9	5.1	5	NaN	NaN	NaN	5.1	5.8	NaN	6.5	6.7	6.1	5.3	5.6	5.3	5.8	5.2	5.2	5.9	5	5.2	NaN	5.1	5.4	5.7	6.8	5.8	5.4	5.9
6.2	NaN	5.1	5.1	5	NaN	6.8	6.2	NaN	NaN	5.9	5.3	NaN	NaN	5.3	5.4	5.2	NaN	5.1	NaN	5	5.9	5.1	5	NaN	NaN	NaN	5.1	5.8	NaN	6.1	6.3	5.6	5.4	5.7	5.4	5.7	5.2	5.2	5.9	5	5.4	NaN	5.1	5.4	5.7	5.5	5.8	5.4	5.8
6.4	NaN	5.1	5.1	5	5.6	7.8	6.4	NaN	NaN	5.9	5.3	NaN	NaN	5.5	5.4	5.4	NaN	5.1	NaN	5	5.9	5.1	5	NaN	NaN	NaN	5.1	5.3	5.4	5.8	6	8.2	5.6	5.6	5.5	5.7	5.2	5.2	5.9	5	5.2	NaN	5.1	5.4	5.7	6.1	5.8	5.4	5.8
NaN	NaN	5.3	5.1	5	NaN	NaN	NaN	NaN	NaN	NaN	5.1	NaN	NaN	NaN	NaN	NaN	NaN	5.1	NaN	5.5	NaN	5.1	5.2	NaN	NaN	NaN	5.1	5	5.4	NaN	NaN	NaN	NaN	5.1	NaN	NaN	NaN	5.2	6.6	NaN	5.3	NaN	NaN	NaN	NaN	5.5	NaN	5.4	NaN
NaN	NaN	5.1	5.1	5	NaN	NaN	NaN	NaN	NaN	NaN	5.3	NaN	NaN	5.1	5.2	5.2	NaN	5.1	NaN	5	NaN	5.1	5	NaN	NaN	NaN	5.1	NaN	NaN	5.1	5	NaN	5.2	5.1	5.2	5.1	5.2	5.2	NaN	5	5.2	NaN	5.1	NaN	NaN	NaN	NaN	NaN	NaN
5.6	5.9	NaN	NaN	NaN	5.2	NaN	NaN	NaN	NaN	5.2	NaN	5.6	5.4	NaN	NaN	NaN	NaN	NaN	NaN	NaN	NaN	NaN	7.5	5.9	8.6	6.2	5.5	NaN	NaN	5.9	6.8	5.6	6.4	NaN	NaN	NaN	NaN	NaN	6.5	NaN	5.7	6.4	NaN	NaN	NaN	NaN	NaN	NaN	NaN
6.2	NaN	5.1	5.1	5	NaN	5.7	5.8	NaN	NaN	5.9	5.4	NaN	NaN	5.5	5.4	5.2	NaN	6.2	4	5	5.9	5.8	5.6	NaN	NaN	NaN	5.1	5.8	NaN	5.2	6.5	5.6	5.4	5.1	6.6	6.7	6.3	5.4	5.9	5	6.2	NaN	5.1	5.4	5.7	5.5	5.8	5.4	5.8
6.2	NaN	5.2	5.1	5	NaN	NaN	5.8	NaN	NaN	NaN	5.4	NaN	NaN	NaN	NaN	NaN	NaN	6.5	NaN	5.1	NaN	6.6	6.9	NaN	NaN	NaN	5.1	6.4	5.5	NaN	NaN	5.7	NaN	6.5	NaN	NaN	NaN	5.3	6.1	NaN	6.4	NaN	NaN	NaN	5.7	5.1	5.8	5.4	NaN
6.2	NaN	5.1	5.1	5	5.9	5.7	5.8	NaN	NaN	5.9	5.6	NaN	NaN	5.1	5.5	5.8	NaN	5.9	4	5	6.1	6.3	6.6	5.8	NaN	NaN	5.1	6.3	NaN	6.3	6.8	5.6	5.8	5.9	6.1	5.9	5.6	5.3	6.2	5	5.8	NaN	5.1	NaN	5.7	5.5	5.8	NaN	5.8
NaN	NaN	5.1	5.1	5	NaN	NaN	NaN	NaN	NaN	NaN	5.4	NaN	NaN	5.1	5.3	5.4	NaN	5.5	NaN	5	5.9	6	5.6	NaN	NaN	NaN	5.1	NaN	NaN	5.5	6.1	5.6	5.3	5.8	6	6	5.7	5.4	NaN	5	5.7	NaN	5.1	NaN	NaN	5.5	NaN	NaN	NaN
NaN	NaN	5.2	5.1	5.2	NaN	NaN	6	NaN	NaN	NaN	5.3	NaN	NaN	NaN	NaN	NaN	NaN	6.2	NaN	5	NaN	6.3	6.8	NaN	NaN	NaN	5.1	6.9	5.4	NaN	NaN	5.6	NaN	6.3	NaN	NaN	NaN	5.3	6.4	NaN	6.5	NaN	NaN	NaN	5.7	5.5	5.8	5.4	NaN
5.6	5.4	NaN	NaN	NaN	6.5	NaN	NaN	NaN	NaN	5.2	NaN	5.6	5.4	NaN	NaN	NaN	NaN	NaN	NaN	NaN	NaN	NaN	7.7	6.4	5.4	7.2	5.5	NaN	NaN	6.9	5.8	5.6	5.4	NaN	NaN	NaN	NaN	NaN	5.3	NaN	5.7	5.6	NaN	NaN	NaN	NaN	NaN	NaN	NaN
NaN	NaN	5.1	5.1	5	NaN	5.7	NaN	NaN	NaN	NaN	5.2	NaN	NaN	5.1	5.2	5.2	NaN	6.6	NaN	5	NaN	6.6	6.5	NaN	NaN	NaN	5.1	5.6	5.4	5.8	6.7	5.6	5.2	5.1	5.9	6.3	NaN	5.5	NaN	5	5.6	NaN	NaN	5.4	5.7	5.1	NaN	5.4	NaN
NaN	NaN	5.1	5.1	5	NaN	5.7	NaN	NaN	NaN	NaN	5.2	NaN	NaN	5.1	5.2	5.2	NaN	5.1	NaN	5.3	NaN	5.1	5	NaN	NaN	NaN	5.1	5.4	5.4	5.3	5	5.6	6.1	6.7	5.2	5.1	5.2	5.2	NaN	5	5.2	NaN	5.1	5.4	NaN	5.5	NaN	5.4	NaN
NaN	NaN	NaN	NaN	NaN	NaN	NaN	NaN	NaN	NaN	NaN	NaN	4	NaN	NaN	NaN	NaN	NaN	NaN	NaN	NaN	NaN	NaN	4.3	NaN	NaN	4.2	4.3	NaN	NaN	NaN	4.9	4	NaN	NaN	NaN	NaN	NaN	NaN	NaN	NaN	4.1	4	NaN	NaN	NaN	NaN	NaN	NaN	NaN
6.2	NaN	5.1	5.1	5	5.9	5.7	5.8	NaN	NaN	5.9	5.3	NaN	NaN	5.1	5.2	5.2	NaN	5.1	NaN	5	5.9	5.1	5	NaN	NaN	NaN	5.1	5.8	NaN	5.1	5	5.6	7.1	8	5.7	6	6.2	5.2	5.9	5	5.2	NaN	5.1	5.4	NaN	5.5	NaN	5.5	5.8
NaN	NaN	NaN	NaN	NaN	5.4	NaN	NaN	NaN	NaN	NaN	NaN	NaN	NaN	NaN	NaN	NaN	NaN	NaN	NaN	NaN	7.1	NaN	NaN	NaN	NaN	NaN	NaN	NaN	NaN	NaN	NaN	NaN	NaN	NaN	NaN	NaN	NaN	NaN	NaN	NaN	NaN	NaN	NaN	NaN	NaN	NaN	NaN	NaN	NaN
NaN	NaN	NaN	NaN	NaN	NaN	NaN	NaN	NaN	NaN	NaN	NaN	4	NaN	NaN	NaN	NaN	NaN	NaN	4	NaN	NaN	NaN	NaN	NaN	NaN	4.2	NaN	NaN	NaN	NaN	5.8	4	NaN	NaN	NaN	NaN	NaN	NaN	NaN	NaN	4.1	4	NaN	NaN	NaN	NaN	NaN	NaN	NaN
6.2	NaN	5.1	5.1	5	5.9	5.7	5.8	NaN	NaN	5.9	5.3	NaN	NaN	5.1	5.2	5.2	NaN	5.1	NaN	5	5.9	5.1	5	NaN	NaN	NaN	5.1	5.8	NaN	5.1	5	5.6	5.2	5.1	7.4	5.1	5.2	5.2	5.9	5	5.2	NaN	5.1	NaN	5.7	5.5	5.8	5.4	5.8
6.2	NaN	5.1	5.1	5	5.9	5.7	5.8	NaN	NaN	5.9	5.2	NaN	NaN	5.3	5.5	5.6	NaN	5.4	NaN	5.7	5.9	5.7	5.7	NaN	NaN	NaN	5.1	5.2	5.4	6	7.2	6	5.2	5.3	5.5	5.7	5.2	5.2	5.9	5	5.9	NaN	5.1	5.4	5.7	5.5	5.8	5.4	5.8
NaN	NaN	NaN	NaN	NaN	NaN	NaN	NaN	NaN	NaN	NaN	NaN	NaN	NaN	NaN	NaN	NaN	NaN	NaN	NaN	NaN	NaN	NaN	NaN	NaN	NaN	NaN	NaN	NaN	NaN	NaN	5.4	NaN	NaN	NaN	NaN	5.5	NaN	NaN	NaN	NaN	NaN	NaN	NaN	NaN	NaN	NaN	NaN	NaN	NaN
NaN	NaN	4.1	4.1	4	NaN	NaN	NaN	NaN	NaN	NaN	NaN	NaN	NaN	NaN	NaN	NaN	NaN	NaN	NaN	NaN	NaN	NaN	NaN	NaN	NaN	NaN	4.6	NaN	NaN	NaN	NaN	NaN	NaN	NaN	NaN	NaN	NaN	NaN	NaN	NaN	NaN	NaN	NaN	NaN	NaN	NaN	NaN	NaN	NaN
4.1	4.1	NaN	NaN	NaN	4.2	NaN	NaN	NaN	NaN	NaN	NaN	4	4.1	NaN	NaN	NaN	NaN	NaN	4	NaN	NaN	NaN	6.1	4.9	6.1	6.3	4.9	NaN	NaN	4.8	6.1	4	5.8	NaN	NaN	NaN	NaN	NaN	5.6	NaN	5.5	5.9	NaN	NaN	NaN	NaN	NaN	NaN	NaN
NaN	NaN	5.1	5.1	5	NaN	NaN	NaN	NaN	NaN	NaN	5.2	NaN	NaN	5.1	5.2	5.2	NaN	5.1	NaN	5	NaN	5.1	5	NaN	NaN	NaN	5.1	5.3	5.4	5.1	5	5.6	5.2	5.1	5.2	5.1	5.2	5.2	NaN	5	5.4	NaN	5.1	5.4	NaN	5.5	NaN	5.4	NaN
6.2	NaN	NaN	NaN	8.2	5.9	6.1	5.8	NaN	NaN	5.9	5.1	NaN	NaN	7	7.8	7.9	NaN	7.3	NaN	7.3	7.9	7.3	7.2	NaN	NaN	NaN	5.1	6.3	6.5	8.5	NaN	5.6	5.6	6.5	7.4	6.2	7	5.2	7	5.2	NaN	NaN	6.6	5.4	5.7	5.5	5.8	5.4	5.8
6.2	NaN	7.4	6.3	7.1	5.9	5.7	5.8	NaN	NaN	5.9	6.9	NaN	NaN	6.5	8	7.6	NaN	6.8	NaN	7.1	7.9	7.1	6.9	NaN	NaN	NaN	5.1	5.9	5.6	NaN	NaN	5.6	5.9	6.6	6.4	6.5	6.3	6.5	6.7	5	NaN	NaN	6.2	5.4	5.7	5.5	5.8	5.4	6
6.2	NaN	5.1	5.1	5	NaN	6	7.1	NaN	NaN	NaN	5.2	NaN	NaN	5.1	5.2	5.2	NaN	5.4	NaN	5	5.9	5.1	5	NaN	NaN	NaN	5.1	5.3	5.4	5.5	5.7	7.6	5.2	5.1	5.2	5.1	NaN	5.4	5.9	5	5.5	NaN	NaN	5.4	6.4	6.9	5.8	5.4	NaN
NaN	NaN	NaN	NaN	NaN	NaN	NaN	NaN	NaN	NaN	NaN	NaN	NaN	NaN	NaN	NaN	NaN	NaN	NaN	NaN	NaN	NaN	NaN	4.4	NaN	NaN	NaN	4.4	NaN	NaN	NaN	4.5	NaN	NaN	NaN	NaN	NaN	NaN	NaN	NaN	NaN	4.4	4.2	NaN	NaN	NaN	NaN	NaN	NaN	NaN
4.4	5.1	NaN	NaN	NaN	4.1	NaN	NaN	NaN	NaN	4.5	NaN	4.7	4.5	NaN	NaN	NaN	NaN	NaN	NaN	NaN	NaN	NaN	5.5	4.7	5	5.3	5.6	NaN	NaN	4.8	5.9	4.4	5.1	NaN	NaN	NaN	NaN	NaN	5.1	NaN	5.8	5.5	NaN	NaN	NaN	NaN	NaN	NaN	NaN
NaN	NaN	NaN	NaN	NaN	NaN	NaN	NaN	NaN	NaN	5.2	NaN	5.8	NaN	NaN	NaN	NaN	NaN	NaN	NaN	NaN	NaN	NaN	5.6	5.9	5.8	5.8	5.9	NaN	NaN	NaN	NaN	NaN	NaN	NaN	NaN	NaN	NaN	NaN	NaN	NaN	NaN	5.6	NaN	NaN	NaN	NaN	NaN	NaN	NaN
NaN	NaN	NaN	NaN	NaN	NaN	NaN	NaN	NaN	NaN	NaN	NaN	NaN	NaN	NaN	NaN	NaN	NaN	NaN	NaN	NaN	NaN	NaN	NaN	NaN	NaN	NaN	NaN	NaN	NaN	NaN	4.4	NaN	4.7	NaN	NaN	NaN	NaN	NaN	NaN	NaN	NaN	NaN	NaN	NaN	NaN	NaN	NaN	NaN	NaN
8.6	6.9	5.1	5.1	5	7.6	NaN	7.4	NaN	NaN	6.7	5.6	5.6	5.2	5.1	5.8	5.7	NaN	5.5	NaN	5	5.9	6.3	5.9	8	5.4	5.8	5.3	5.8	NaN	5.9	5.8	6.8	5.4	5.1	5.2	5.1	5.2	5.2	6.1	7.4	5.4	5.6	5.1	5.4	6.4	7.5	5.8	5.4	6.9
6.2	NaN	5.1	5.1	5	6.8	7.8	6.1	NaN	NaN	5.9	5.3	NaN	NaN	5.1	5.2	5.2	NaN	5.1	4	5	5.9	5.1	5	NaN	NaN	NaN	5.1	5.8	NaN	5.1	5.1	6.2	5.2	5.1	5.2	5.1	5.2	5.2	5.9	5	5.2	NaN	5.1	5.4	5.7	6.7	5.8	5.4	5.8
NaN	4.1	4.1	4.1	4	NaN	NaN	NaN	NaN	NaN	NaN	NaN	NaN	4.1	NaN	NaN	NaN	NaN	NaN	NaN	NaN	NaN	NaN	4.2	4.1	4.1	NaN	4.1	NaN	NaN	4.1	5.2	NaN	4.2	NaN	NaN	NaN	NaN	NaN	NaN	NaN	4.7	4.5	NaN	NaN	NaN	NaN	NaN	NaN	NaN
NaN	NaN	NaN	NaN	NaN	NaN	NaN	NaN	NaN	NaN	NaN	NaN	NaN	NaN	5.4	5.2	5.4	NaN	NaN	NaN	5.1	NaN	NaN	NaN	NaN	NaN	NaN	NaN	NaN	NaN	5.2	NaN	NaN	NaN	NaN	NaN	NaN	NaN	NaN	NaN	NaN	NaN	NaN	NaN	NaN	NaN	NaN	NaN	NaN	NaN
NaN	NaN	NaN	NaN	NaN	NaN	NaN	NaN	NaN	NaN	NaN	NaN	NaN	NaN	NaN	NaN	NaN	NaN	NaN	NaN	NaN	NaN	NaN	NaN	NaN	NaN	NaN	NaN	NaN	NaN	NaN	NaN	NaN	NaN	NaN	NaN	NaN	NaN	NaN	NaN	NaN	NaN	NaN	NaN	NaN	NaN	NaN	NaN	NaN	NaN
NaN	NaN	NaN	NaN	NaN	NaN	NaN	NaN	NaN	NaN	NaN	NaN	NaN	NaN	NaN	NaN	NaN	NaN	NaN	NaN	NaN	NaN	NaN	NaN	NaN	NaN	NaN	NaN	NaN	NaN	NaN	NaN	NaN	NaN	NaN	NaN	NaN	NaN	NaN	NaN	NaN	NaN	NaN	NaN	NaN	NaN	NaN	NaN	NaN	NaN
6.2	NaN	5.1	5.1	5	5.9	NaN	5.8	NaN	NaN	5.9	5.3	NaN	NaN	5.1	5.2	5.2	NaN	5.1	NaN	5	5.9	5.1	5	NaN	NaN	NaN	5.1	5.8	NaN	5.1	5	5.6	5.2	5.1	5.2	5.1	5.2	5.2	5.9	5	5.2	NaN	5.1	NaN	5.7	5.5	5.8	5.4	5.8
NaN	NaN	5.1	5.1	5	NaN	NaN	NaN	NaN	NaN	NaN	NaN	NaN	NaN	5.1	NaN	NaN	NaN	5.1	NaN	5	NaN	5.1	5	NaN	NaN	NaN	5.1	NaN	NaN	5.1	6.1	NaN	NaN	5.1	NaN	NaN	NaN	NaN	NaN	5	NaN	NaN	NaN	NaN	NaN	NaN	NaN	NaN	NaN
4.2	NaN	4.1	4.1	4	4.9	NaN	NaN	NaN	NaN	NaN	NaN	4	NaN	NaN	NaN	NaN	NaN	NaN	NaN	NaN	NaN	NaN	NaN	4.2	NaN	4.2	4.1	NaN	NaN	NaN	5.3	4.2	4.5	NaN	NaN	NaN	NaN	NaN	NaN	NaN	4.1	4.2	NaN	NaN	4.7	NaN	4.8	NaN	NaN
6.2	NaN	5.1	5.1	5	5.9	5.7	5.8	NaN	NaN	5.9	5.2	NaN	NaN	5.1	5.2	5.2	NaN	NaN	NaN	6.1	6.2	5.1	5	NaN	NaN	NaN	5.1	6	5.4	5.1	5.8	5.6	5.2	5.1	6.1	6	6.2	5.2	7.4	5	5.2	NaN	5.1	5.4	5.7	5.5	5.8	5.4	5.8
NaN	4.7	NaN	NaN	NaN	5.1	NaN	NaN	NaN	NaN	NaN	NaN	4	5	NaN	NaN	NaN	NaN	NaN	4	NaN	NaN	NaN	5.6	4.6	5.9	6.4	NaN	NaN	NaN	4.9	6.5	5	4.9	NaN	NaN	NaN	NaN	NaN	5	NaN	5.3	5.4	NaN	NaN	NaN	NaN	NaN	NaN	NaN
NaN	5.4	NaN	NaN	NaN	5.2	NaN	NaN	NaN	NaN	5.2	NaN	5.6	5.7	NaN	NaN	NaN	5.9	NaN	NaN	NaN	7.5	NaN	NaN	NaN	5.8	NaN	NaN	NaN	NaN	5.4	NaN	5.6	5.4	NaN	NaN	NaN	NaN	NaN	NaN	NaN	5.7	5.6	NaN	NaN	NaN	NaN	NaN	NaN	NaN
6.2	NaN	5.1	5.1	5	NaN	NaN	7.9	NaN	NaN	NaN	5.1	NaN	NaN	NaN	NaN	NaN	NaN	5.1	4	5	NaN	5.1	5	NaN	NaN	NaN	5.1	5.9	5.4	NaN	NaN	5.6	NaN	5.1	NaN	NaN	NaN	5.2	5.9	NaN	5.2	NaN	NaN	NaN	8.2	5.5	8.8	7.8	NaN
6.2	NaN	8.2	7	6.9	5.9	5.7	5.8	NaN	NaN	5.9	5.2	NaN	NaN	5.3	5.6	5.3	NaN	5.1	NaN	5.3	5.9	5.6	5.6	NaN	NaN	NaN	5.1	5.4	5.4	8.3	8.3	5.6	5.2	5.3	5.2	5.1	5.2	5.3	5.9	5	8.1	NaN	5.1	5.4	5.7	5.5	5.8	5.4	5.8
6.2	NaN	7.4	6.3	7.1	NaN	NaN	5.8	NaN	NaN	NaN	7.5	NaN	NaN	NaN	NaN	NaN	NaN	6.5	NaN	7.6	NaN	6.8	6.9	NaN	NaN	NaN	5.2	6.4	5.6	NaN	NaN	5.6	NaN	6.9	NaN	NaN	NaN	5.2	6.6	NaN	NaN	NaN	NaN	NaN	5.7	5.1	5.8	5.4	NaN
5.4	5.4	NaN	NaN	NaN	5.2	NaN	NaN	NaN	NaN	5.2	NaN	5.6	6.4	NaN	NaN	NaN	NaN	NaN	NaN	NaN	NaN	NaN	7.1	NaN	6.5	6.7	NaN	NaN	NaN	8.6	9	5.6	5.4	NaN	NaN	NaN	NaN	NaN	6.2	NaN	8.5	8.7	NaN	NaN	NaN	NaN	NaN	NaN	NaN
6.2	NaN	8	6.6	6.8	5.9	5.7	5.8	NaN	NaN	5.9	5.2	NaN	NaN	5.1	6	5.7	NaN	5.3	NaN	5.2	5.9	5.5	5.9	NaN	NaN	NaN	5.1	5.5	5.4	8.3	NaN	5.6	5.2	5.1	5.2	5.1	5.2	5.2	5.9	5	8.4	NaN	5.1	5.4	5.7	5.5	5.8	5.4	5.8
6.2	NaN	6.8	5.2	5.4	5.9	5.7	7	NaN	NaN	5.9	5.3	NaN	NaN	5.1	5.2	5.2	NaN	5.3	NaN	5.6	5.9	5.3	5	6.6	NaN	NaN	5.1	5.8	NaN	6.9	7.6	5.6	5.2	5.1	5.2	5.1	5.2	5.2	5.9	5	6.7	NaN	5.1	NaN	5.7	5.5	5.8	NaN	5.8
NaN	NaN	NaN	NaN	NaN	NaN	NaN	NaN	NaN	NaN	NaN	NaN	NaN	NaN	NaN	NaN	NaN	NaN	NaN	4	NaN	6.3	NaN	NaN	NaN	NaN	NaN	NaN	NaN	NaN	NaN	NaN	NaN	NaN	NaN	NaN	NaN	NaN	NaN	NaN	NaN	NaN	NaN	NaN	NaN	NaN	NaN	NaN	NaN	NaN
NaN	NaN	NaN	NaN	NaN	NaN	NaN	NaN	NaN	NaN	NaN	NaN	NaN	NaN	NaN	NaN	NaN	NaN	NaN	NaN	NaN	7.5	6.3	NaN	NaN	NaN	NaN	NaN	NaN	NaN	NaN	8	NaN	NaN	NaN	NaN	NaN	NaN	NaN	NaN	NaN	NaN	NaN	NaN	NaN	NaN	NaN	NaN	NaN	NaN
6.2	NaN	7.9	6.7	7.6	NaN	NaN	5.8	NaN	NaN	NaN	5.5	NaN	NaN	NaN	NaN	NaN	NaN	6.8	NaN	6.7	NaN	6.8	6.5	NaN	NaN	NaN	5.4	6.4	5.4	NaN	NaN	5.6	NaN	6.1	NaN	NaN	NaN	6.4	7.2	NaN	8.4	NaN	NaN	NaN	5.8	5.5	5.8	5.4	NaN
6.6	5.4	5.1	5.1	6.5	7.2	NaN	6.9	NaN	NaN	5.6	6.2	5.8	5.3	5.1	6.4	6.4	6.8	5.4	NaN	5.7	7.2	7	6.5	6.8	5.5	5.8	5.9	7	NaN	6	7.1	6	6	5.1	6	6.3	5.6	5.3	7	5	5.8	6.1	5.1	NaN	5.7	5.5	5.8	5.4	8.5
NaN	NaN	NaN	NaN	NaN	NaN	NaN	NaN	NaN	NaN	NaN	NaN	NaN	NaN	NaN	NaN	NaN	NaN	NaN	NaN	NaN	NaN	NaN	NaN	NaN	NaN	NaN	6.1	NaN	NaN	NaN	NaN	NaN	NaN	NaN	NaN	NaN	NaN	NaN	NaN	NaN	NaN	NaN	NaN	NaN	NaN	NaN	NaN	NaN	NaN
NaN	5.6	NaN	NaN	NaN	5.2	NaN	NaN	NaN	NaN	5.2	NaN	NaN	5.4	NaN	NaN	NaN	NaN	NaN	NaN	NaN	NaN	NaN	5.9	5.4	5.7	NaN	6	NaN	NaN	5.4	6.6	NaN	5.4	NaN	NaN	NaN	NaN	NaN	5.4	NaN	6.1	6	NaN	NaN	NaN	NaN	NaN	NaN	NaN
NaN	NaN	NaN	NaN	NaN	NaN	NaN	NaN	NaN	NaN	NaN	NaN	NaN	NaN	NaN	NaN	NaN	NaN	NaN	NaN	NaN	NaN	NaN	NaN	NaN	NaN	NaN	NaN	NaN	NaN	NaN	NaN	NaN	NaN	NaN	NaN	NaN	NaN	NaN	NaN	NaN	NaN	NaN	NaN	NaN	NaN	NaN	NaN	NaN	NaN
NaN	NaN	NaN	NaN	NaN	NaN	NaN	NaN	NaN	NaN	NaN	NaN	NaN	NaN	NaN	NaN	NaN	NaN	NaN	NaN	NaN	NaN	NaN	NaN	NaN	NaN	NaN	NaN	NaN	NaN	NaN	NaN	NaN	NaN	NaN	NaN	NaN	NaN	NaN	NaN	NaN	NaN	NaN	NaN	NaN	NaN	NaN	NaN	NaN	NaN
NaN	NaN	5.1	5.1	5	5.9	5.7	5.8	NaN	NaN	5.9	5.2	NaN	NaN	5.1	5.2	5.2	NaN	5.1	NaN	5	5.9	5.1	5	NaN	NaN	NaN	5.1	5.3	5.4	6.9	6.8	5.6	5.2	5.1	5.2	5.1	5.2	5.2	5.9	5	5.4	NaN	5.1	5.4	5.7	5.1	5.8	5.4	5.8
NaN	NaN	5.1	5.1	5	NaN	NaN	NaN	NaN	NaN	NaN	5.2	NaN	NaN	5.1	5.2	5.2	NaN	5.1	NaN	5	NaN	5.1	5	NaN	NaN	NaN	5.1	NaN	NaN	5.1	5.8	5.6	5.2	5.1	5.2	5.1	5.2	5.2	NaN	5	5.4	NaN	5.1	5.4	NaN	5.5	NaN	5.4	NaN
NaN	NaN	NaN	NaN	5	NaN	NaN	NaN	NaN	NaN	NaN	NaN	NaN	NaN	NaN	NaN	NaN	NaN	NaN	NaN	5	NaN	NaN	NaN	NaN	NaN	NaN	NaN	NaN	NaN	NaN	NaN	NaN	NaN	NaN	NaN	NaN	NaN	NaN	NaN	5	NaN	NaN	NaN	NaN	NaN	NaN	NaN	NaN	NaN
5.7	5.9	NaN	NaN	NaN	5.8	NaN	NaN	NaN	NaN	5.3	NaN	5.7	5.4	NaN	NaN	NaN	NaN	NaN	4	NaN	NaN	NaN	5.6	5.7	NaN	NaN	NaN	NaN	NaN	5.4	6	5.7	5.9	NaN	NaN	NaN	NaN	NaN	5.6	NaN	5.7	5.7	NaN	NaN	NaN	NaN	NaN	NaN	NaN
NaN	NaN	NaN	NaN	NaN	NaN	NaN	NaN	NaN	NaN	NaN	NaN	NaN	NaN	NaN	NaN	NaN	NaN	NaN	NaN	NaN	NaN	NaN	NaN	NaN	NaN	NaN	NaN	NaN	NaN	NaN	NaN	NaN	NaN	NaN	NaN	NaN	NaN	NaN	NaN	NaN	NaN	NaN	NaN	NaN	NaN	NaN	NaN	NaN	NaN
6.2	NaN	8	7.7	8	5.9	5.8	6.3	NaN	NaN	5.9	5.3	NaN	NaN	5.6	5.7	5.5	NaN	5.2	NaN	6.3	6.3	6.1	5.6	NaN	NaN	NaN	6	7	NaN	7.7	8.3	5.6	5.2	5.1	6.1	6.2	6.1	5.2	7	5.6	6.9	NaN	5.1	5.4	5.7	5.6	5.8	5.4	5.8
NaN	NaN	5.1	5.1	5	5.9	NaN	5.8	NaN	NaN	NaN	5.3	NaN	NaN	5.1	5.2	5.2	NaN	5.1	NaN	5	NaN	5.1	5	NaN	NaN	NaN	5.1	5.8	NaN	6	6.7	5.6	5.2	5.1	5.2	5.1	5.2	5.2	5.9	5	6.8	NaN	5.1	NaN	5.7	5.5	5.8	5.4	5.8
6.2	NaN	5.1	5.1	5	NaN	NaN	5.8	NaN	NaN	NaN	5.1	NaN	NaN	NaN	NaN	NaN	NaN	NaN	NaN	5	NaN	5.5	5.5	NaN	NaN	NaN	7.5	5	5.4	NaN	NaN	5.6	NaN	5.1	NaN	NaN	NaN	5.2	5.9	NaN	5.2	NaN	NaN	NaN	5.7	5.5	5.8	5.4	NaN
NaN	NaN	NaN	NaN	5	NaN	NaN	NaN	NaN	NaN	NaN	5.1	NaN	NaN	NaN	NaN	NaN	NaN	NaN	NaN	5	NaN	5.1	5	NaN	NaN	NaN	NaN	5	NaN	NaN	NaN	NaN	NaN	NaN	NaN	NaN	NaN	NaN	NaN	NaN	NaN	NaN	NaN	NaN	NaN	NaN	NaN	NaN	NaN
6.2	NaN	5.1	5.1	5	5.9	5.7	5.8	NaN	NaN	5.9	5.2	NaN	NaN	5.1	5.2	5.2	NaN	5.1	NaN	5	5.9	5.1	5	NaN	NaN	NaN	5.1	5.3	5.4	5.1	6.1	5.6	5.2	5.1	5.2	5.1	5.2	5.2	5.9	5	5.3	NaN	5.1	5.4	5.7	5.5	5.8	5.4	5.8
NaN	NaN	5.1	5.1	5	NaN	NaN	NaN	NaN	NaN	NaN	NaN	NaN	NaN	5.1	NaN	5.2	NaN	5.1	NaN	5	NaN	5.1	5	NaN	NaN	NaN	5.1	NaN	NaN	5.1	5.9	6.2	5.2	5.1	NaN	5.1	NaN	NaN	NaN	5	5.2	NaN	NaN	NaN	NaN	5.1	NaN	NaN	NaN
NaN	NaN	5.1	5.1	5	NaN	5.7	NaN	NaN	NaN	NaN	5.2	NaN	NaN	5.1	5.2	5.2	NaN	5.1	NaN	5	NaN	5.1	5	NaN	NaN	NaN	5.1	5.3	5.4	5.1	5.6	5.6	5.2	5.1	5.2	5.1	5.2	5.2	NaN	5	5.2	NaN	5.1	5.4	5.7	5.5	NaN	5.4	5.8
NaN	NaN	NaN	NaN	NaN	NaN	NaN	NaN	NaN	NaN	NaN	NaN	NaN	NaN	NaN	NaN	NaN	NaN	NaN	4	NaN	7.3	NaN	NaN	NaN	NaN	NaN	NaN	NaN	NaN	NaN	NaN	NaN	NaN	NaN	NaN	NaN	NaN	NaN	NaN	NaN	NaN	NaN	NaN	NaN	NaN	NaN	NaN	NaN	NaN
6.5	NaN	5.1	5.1	5	6.4	NaN	6.2	NaN	NaN	6.6	5.3	NaN	NaN	5.1	5.9	5.7	NaN	6.3	7.3	5	NaN	6.5	6.4	NaN	NaN	NaN	5.5	6.4	NaN	6	6.5	6.5	6.2	6.6	6.8	7.1	6.6	7.1	6.8	5	7	NaN	6	NaN	6.7	6.5	5.8	6.4	8
NaN	NaN	NaN	NaN	NaN	NaN	NaN	NaN	NaN	NaN	NaN	NaN	NaN	NaN	NaN	NaN	NaN	NaN	NaN	NaN	NaN	NaN	NaN	NaN	NaN	NaN	NaN	NaN	NaN	NaN	NaN	NaN	NaN	NaN	NaN	NaN	NaN	NaN	NaN	NaN	NaN	NaN	NaN	NaN	NaN	NaN	NaN	NaN	NaN	NaN
NaN	NaN	NaN	NaN	NaN	NaN	NaN	NaN	NaN	NaN	NaN	NaN	NaN	NaN	NaN	5.5	NaN	NaN	NaN	NaN	NaN	NaN	6.5	6.1	5.4	6.3	7.5	NaN	NaN	NaN	6.7	7.3	NaN	7	NaN	NaN	NaN	NaN	NaN	7	NaN	5.9	NaN	NaN	NaN	NaN	NaN	NaN	NaN	NaN
NaN	NaN	NaN	NaN	NaN	NaN	NaN	NaN	NaN	NaN	NaN	NaN	NaN	NaN	NaN	NaN	NaN	NaN	NaN	NaN	NaN	NaN	NaN	NaN	NaN	NaN	NaN	NaN	NaN	NaN	NaN	NaN	NaN	NaN	NaN	NaN	NaN	NaN	NaN	NaN	NaN	NaN	NaN	NaN	NaN	NaN	NaN	NaN	NaN	NaN
NaN	NaN	NaN	NaN	NaN	NaN	NaN	NaN	NaN	NaN	NaN	NaN	NaN	NaN	NaN	NaN	NaN	NaN	NaN	NaN	NaN	NaN	6.4	NaN	NaN	NaN	NaN	NaN	NaN	NaN	NaN	7.1	NaN	NaN	NaN	NaN	NaN	NaN	NaN	NaN	NaN	NaN	NaN	NaN	NaN	NaN	NaN	NaN	NaN	NaN
6.1	6.1	NaN	NaN	NaN	5.8	NaN	NaN	NaN	NaN	6	NaN	5.6	5.4	NaN	NaN	NaN	NaN	NaN	NaN	NaN	NaN	NaN	7.2	5.4	6.5	7.1	5.5	NaN	NaN	6	6.9	5.6	6.5	NaN	NaN	NaN	NaN	NaN	7.1	NaN	6	6.4	NaN	NaN	NaN	NaN	NaN	NaN	NaN
6.2	NaN	5.1	5.1	5	5.8	NaN	6.3	NaN	NaN	5.9	5.8	NaN	NaN	5.3	6.6	6.2	NaN	7.1	NaN	5.3	NaN	7.3	7.1	5.6	6.5	7.8	6.3	6.5	NaN	6.2	7	6.5	6	6.6	6.5	7	6.4	8	7.3	5	7	NaN	6.3	NaN	6.4	6.6	5.8	6.3	7.5
6.3	NaN	5.1	5.3	5.1	5.6	NaN	6.4	NaN	NaN	6.3	5.9	NaN	NaN	5.1	6.2	5.8	NaN	7.1	NaN	5	NaN	7.1	6.8	5.6	NaN	7.4	5.9	6.6	NaN	6.8	7.9	6.3	6.3	6.8	7	7.3	6.8	7.6	7	5	7.5	NaN	6.5	NaN	6.5	6.2	6.1	6.4	7.5
NaN	NaN	NaN	NaN	NaN	7.2	NaN	NaN	NaN	NaN	NaN	NaN	NaN	NaN	NaN	NaN	NaN	NaN	NaN	NaN	NaN	9.9	NaN	NaN	NaN	NaN	NaN	NaN	NaN	NaN	NaN	NaN	NaN	NaN	NaN	NaN	NaN	NaN	NaN	NaN	NaN	NaN	NaN	NaN	NaN	NaN	NaN	NaN	NaN	NaN
NaN	NaN	NaN	NaN	NaN	NaN	NaN	NaN	NaN	NaN	NaN	NaN	NaN	NaN	NaN	NaN	NaN	NaN	NaN	7.1	NaN	NaN	NaN	NaN	NaN	NaN	NaN	NaN	NaN	NaN	NaN	NaN	NaN	NaN	NaN	NaN	NaN	NaN	NaN	NaN	NaN	NaN	NaN	NaN	NaN	NaN	NaN	NaN	NaN	NaN
6.6	7.4	NaN	NaN	NaN	6	NaN	NaN	NaN	NaN	5.8	NaN	5.6	5.7	NaN	NaN	NaN	NaN	NaN	NaN	NaN	NaN	NaN	7.6	6.7	6.6	6.8	6.4	NaN	NaN	6.6	8	7.6	7.2	NaN	NaN	NaN	NaN	NaN	7.2	NaN	6.7	7	NaN	NaN	NaN	NaN	NaN	NaN	NaN
5.9	5.4	NaN	NaN	NaN	5.5	NaN	NaN	NaN	NaN	5.3	NaN	6.2	5.4	NaN	NaN	NaN	NaN	NaN	NaN	NaN	NaN	NaN	5.5	5.9	6.1	6.6	6.2	NaN	NaN	5.4	6	5.6	5.4	NaN	NaN	NaN	NaN	NaN	5.3	NaN	NaN	5.6	NaN	NaN	NaN	NaN	NaN	NaN	NaN
6.2	NaN	5.1	5.1	5	NaN	NaN	5.8	NaN	NaN	NaN	5.1	NaN	NaN	NaN	NaN	NaN	NaN	5.5	4	5	NaN	6.4	6.1	NaN	NaN	NaN	5.1	5	5.4	NaN	NaN	5.7	NaN	5.3	NaN	NaN	NaN	5.2	5.9	NaN	5.6	NaN	NaN	NaN	5.7	5.1	5.8	5.4	NaN
6.2	NaN	5.1	5.1	5	NaN	5.7	5.8	NaN	NaN	5.9	5.7	NaN	NaN	6.7	6.7	6.8	NaN	6.1	NaN	5	5.9	5.7	6.1	NaN	NaN	NaN	5.1	5.8	NaN	5.7	6.9	5.6	5.2	5.2	5.2	5.1	5.2	5.6	5.9	5	6.3	NaN	5.1	5.4	5.7	5.5	5.8	5.4	6
NaN	NaN	5.1	5.1	5	NaN	5.7	NaN	NaN	NaN	NaN	5.3	NaN	NaN	5.1	5.2	5.2	NaN	5.1	NaN	5	NaN	5.1	5	NaN	NaN	NaN	5.1	5.8	NaN	5.1	5	5.6	5.2	5.1	5.2	5.1	5.2	5.2	NaN	5	5.2	NaN	5.1	5.4	6.5	5.5	NaN	5.4	5.8
NaN	5.4	5.1	5.1	5	5.4	5.7	5.8	NaN	NaN	5.2	5.1	5.6	5.1	5.1	6.9	6.5	NaN	NaN	4	5	5.9	5.2	5.3	5.4	5.4	5.8	NaN	5.8	5.4	5.3	5.6	5.6	5.3	5.1	5.2	5.1	NaN	5.2	5.4	5	5.5	5.6	NaN	5.4	5.7	5.5	5.8	5.4	NaN
6.2	NaN	5.1	5.1	5	5.9	6.6	5.8	NaN	NaN	5.9	5.8	NaN	NaN	5.4	5.6	5.6	NaN	5.6	NaN	5	6.1	5.8	6	NaN	NaN	NaN	5.1	5.8	5.4	6.7	7.9	5.6	6	7.3	5.8	5.9	5.9	6.1	6.4	5	7.1	NaN	5.7	5.4	5.7	5.5	5.8	5.4	5.8
NaN	NaN	NaN	NaN	NaN	6.7	NaN	NaN	NaN	NaN	NaN	NaN	NaN	NaN	NaN	NaN	NaN	NaN	NaN	NaN	NaN	NaN	NaN	NaN	NaN	NaN	NaN	NaN	NaN	NaN	NaN	NaN	NaN	NaN	NaN	NaN	NaN	NaN	NaN	NaN	NaN	NaN	NaN	NaN	NaN	NaN	NaN	NaN	NaN	NaN
5.9	7.4	5.1	5.1	5	5.9	NaN	6.3	NaN	NaN	5.7	5.3	5.6	5.1	5.1	5.2	5.2	NaN	5.7	NaN	5	6.7	6.6	5.6	5.4	5.8	5.8	5.4	6.4	NaN	5.2	5.5	5.8	5.3	5.2	5.2	5.1	5.2	5.2	5.5	5	5.4	5.6	5.1	NaN	5.7	5.6	5.8	5.4	5.8
6.2	NaN	5.1	5.1	5	5.5	5.7	5.8	NaN	NaN	5.9	5.2	NaN	NaN	5.1	5.2	5.2	NaN	5.1	NaN	5	5.9	5.1	5	NaN	NaN	NaN	5.1	5.8	NaN	5.1	5	5.6	5.2	5.1	NaN	5.1	NaN	5.2	5.9	5	5.2	NaN	5.1	5.4	5.7	5.5	5.8	5.4	5.8
6.2	NaN	5.1	5.1	5	NaN	5.7	5.8	NaN	NaN	5.9	5.3	NaN	NaN	5.1	5.2	5.2	NaN	5.1	NaN	5	5.9	5.1	5	NaN	NaN	NaN	5.1	5.8	NaN	5.2	6	5.6	5.2	5.1	5.2	5.1	5.2	5.2	5.9	5	5.2	NaN	5.1	5.4	5.7	5.5	5.8	5.4	5.8
6.3	5.4	5.1	5.1	5	5.7	NaN	7.4	NaN	NaN	6.2	5.3	5.6	5.2	5.1	5.2	5.2	NaN	5.1	NaN	5	5.9	5.1	5.2	5.4	5.5	5.8	5.2	5.8	NaN	5.5	5.5	5.7	5.3	5.1	5.2	5.1	5.2	5.7	5.5	5	5.5	5.6	5.1	NaN	6.7	7.5	5.9	5.6	7
6.2	NaN	5.1	5.1	5	NaN	5.7	5.8	NaN	NaN	5.9	5.2	NaN	NaN	5.1	5.2	5.2	NaN	7.1	NaN	5	5.9	6.8	6.8	NaN	6.9	NaN	5.2	6.3	NaN	5.5	6.3	5.6	5.2	5.7	NaN	5.1	NaN	5.7	5.9	5	6.7	NaN	5.1	5.4	5.7	5.5	5.8	5.4	5.8
6.2	NaN	5.1	5.1	5.1	5.9	NaN	5.8	NaN	NaN	5.9	5.3	NaN	NaN	5.4	5.2	5.7	NaN	6	NaN	5.3	8.2	6.3	5.4	NaN	NaN	NaN	5.1	5.8	NaN	NaN	NaN	5.6	7	6.8	7.1	7.2	7.1	6.1	6.3	5	NaN	NaN	7.3	NaN	5.7	5.5	5.8	5.4	5.8
6.2	NaN	5.1	5.1	5	5.9	NaN	5.8	NaN	NaN	5.9	5.3	NaN	NaN	5.1	5.5	5.2	NaN	6.6	4	5	9.4	6.4	5.9	7.1	7.5	8.2	5.1	5.9	NaN	NaN	NaN	5.6	7.8	7.6	7.3	7.4	7.5	6.4	6.4	5	NaN	NaN	7.9	NaN	5.7	5.5	5.8	5.4	5.8
NaN	NaN	NaN	NaN	NaN	NaN	NaN	NaN	NaN	NaN	NaN	NaN	NaN	NaN	NaN	NaN	NaN	NaN	NaN	NaN	NaN	NaN	NaN	NaN	NaN	NaN	NaN	NaN	NaN	NaN	NaN	NaN	NaN	NaN	NaN	NaN	NaN	NaN	NaN	NaN	NaN	NaN	NaN	NaN	NaN	NaN	NaN	NaN	NaN	NaN
6.5	5.4	NaN	NaN	NaN	5.5	NaN	NaN	NaN	NaN	5.3	NaN	5.6	5.4	NaN	NaN	NaN	NaN	NaN	4	NaN	NaN	NaN	6.2	5.4	5.4	NaN	5.5	NaN	NaN	5.4	6	5.6	5.4	NaN	NaN	NaN	NaN	NaN	5.3	NaN	NaN	5.6	NaN	NaN	NaN	NaN	NaN	NaN	NaN
6.2	NaN	5.1	5.1	5	5.9	6.1	5.8	NaN	NaN	5.9	5.3	NaN	NaN	5.1	5.2	5.2	NaN	7.2	NaN	5	5.9	7.2	6.6	NaN	NaN	NaN	5.3	5.8	5.4	7	7.7	5.6	5.4	5.8	NaN	5.5	5.6	6.8	5.9	5	6.4	NaN	5.1	NaN	5.7	5.5	5.8	5.4	6
6.2	NaN	5.1	5.1	5	5.9	5.7	5.8	NaN	NaN	5.9	5.2	NaN	NaN	5.1	5.2	5.2	NaN	5.1	NaN	5	5.9	5.7	5.5	NaN	NaN	NaN	5.1	6	5.4	6.2	7.4	5.6	5.2	5.1	5.2	5.2	5.2	5.2	5.9	5	6.1	NaN	5.1	5.4	5.7	5.1	5.8	5.4	5.8
6.2	NaN	5.1	5.1	5	5.9	5.7	5.8	NaN	NaN	5.9	5.2	NaN	NaN	5.1	5.2	5.2	NaN	5.8	NaN	5.1	5.9	6	6.1	NaN	NaN	NaN	5.1	5.4	5.4	6.1	6.4	5.6	5.2	5.3	5.2	5.1	5.2	7.4	5.9	5	6.6	NaN	5.1	5.4	5.7	5.5	5.8	5.4	5.8
5.4	5.4	NaN	NaN	NaN	5.2	NaN	NaN	NaN	NaN	5.2	NaN	5.6	5.1	NaN	NaN	NaN	NaN	NaN	NaN	NaN	NaN	NaN	6.7	5.4	6.6	6	NaN	NaN	NaN	5.4	5.6	5.6	5.4	NaN	NaN	NaN	NaN	NaN	5.3	NaN	5.7	5.8	NaN	NaN	NaN	NaN	NaN	NaN	NaN
NaN	NaN	NaN	5.1	5	5.9	NaN	5.8	NaN	NaN	NaN	5.3	NaN	NaN	5.1	5.2	5.2	NaN	5.1	NaN	5	5.9	5.1	5	NaN	NaN	NaN	5.1	5.8	NaN	5.1	5.7	5.6	5.2	5.1	5.2	5.1	5.2	7.3	5.9	5	5.2	NaN	5.1	NaN	5.7	5.5	5.8	5.4	5.8
6.2	NaN	5.1	5.1	5	5.9	5.7	5.8	NaN	NaN	5.9	5.3	NaN	NaN	5.1	5.2	5.2	NaN	6.4	NaN	5	5.9	6.6	7	NaN	NaN	NaN	5.1	5.8	NaN	6.2	6.6	6	5.2	5.4	5.2	5.1	5.2	5.4	5.9	5	6.5	NaN	5.1	5.4	5.7	5.5	5.8	5.4	5.8
7.8	NaN	5.1	5.1	5	6	8.4	9	NaN	NaN	5.9	5.3	NaN	NaN	5.1	5.2	5.2	NaN	5.1	NaN	5	5.9	5.1	5	NaN	NaN	NaN	5.1	5.8	NaN	5.1	5	8.2	5.2	5.1	5.2	5.1	5.2	5.2	5.9	5	5.2	NaN	5.1	NaN	5.7	7.9	5.8	5.4	6.6
7.6	NaN	5.1	5.1	5	5.6	7.6	NaN	NaN	NaN	7.5	5.2	NaN	NaN	5.1	5.5	5.6	NaN	5.2	NaN	5	5.9	5.1	5	NaN	NaN	NaN	5.1	5.3	5.4	5.1	6.7	7.5	5.2	5.7	5.2	5.1	5.2	5.2	5.9	5	5.9	NaN	5.1	5.4	6	7.1	5.8	5.4	6.3
7.8	7.2	NaN	NaN	NaN	6.2	NaN	NaN	NaN	NaN	5.8	NaN	5.6	5.2	NaN	NaN	NaN	NaN	NaN	NaN	NaN	NaN	NaN	5.9	5.4	5.9	5.8	5.5	NaN	NaN	6	6.1	6.4	7.4	NaN	NaN	NaN	NaN	NaN	5.3	NaN	6	5.9	NaN	NaN	NaN	NaN	NaN	NaN	NaN
6.2	NaN	5.1	5.1	5	5.9	6.2	5.9	NaN	NaN	5.9	5.4	NaN	NaN	5.1	5.8	5.7	NaN	6.5	NaN	5	5.9	7.3	8.1	7	5.5	6.3	5.6	6.1	NaN	6.2	6.6	5.6	5.2	5.5	5.2	5.1	5.2	5.2	5.9	5	6	NaN	5.1	5.4	5.7	5.5	5.8	5.4	5.8
6.2	NaN	5.1	5.1	5	5.9	5.7	5.8	NaN	NaN	5.9	5.4	NaN	NaN	5.1	5.2	5.2	NaN	5.1	NaN	5	5.9	5.1	5	NaN	NaN	NaN	5.1	5.8	NaN	5.1	5.2	5.6	6.4	7.5	5.2	5.6	5.5	5.2	5.9	5	5.2	NaN	5.1	5.4	NaN	6.1	NaN	5.4	5.8
6.3	NaN	5.1	5.1	5	NaN	NaN	5.8	NaN	NaN	NaN	5.1	NaN	NaN	NaN	NaN	NaN	NaN	5.1	NaN	5	NaN	5.1	5	NaN	NaN	NaN	5.1	5	5.4	NaN	NaN	5.6	NaN	7.3	NaN	NaN	NaN	5.2	5.9	NaN	6	NaN	NaN	NaN	7.2	5.5	6.2	5.4	NaN
6.2	NaN	5.1	5.1	5	5.9	5.7	5.8	NaN	NaN	5.9	5.3	NaN	NaN	5.1	5.2	5.2	NaN	5.1	NaN	5	5.9	5.1	5	NaN	NaN	NaN	5.1	5.8	NaN	5.1	5.1	5.6	5.2	6.5	5.2	5.1	5.2	5.2	5.9	5	6.2	NaN	5.1	NaN	5.9	5.5	6	5.7	5.8
6.2	NaN	5.1	5.1	5	5.9	5.7	6	NaN	NaN	5.9	5.2	NaN	NaN	5.3	5.2	5.2	NaN	5.1	4	5	5.9	5.1	5	NaN	NaN	NaN	5.1	5.3	5.4	5.1	5.3	5.6	5.2	6.7	5.2	5.1	5.2	5.2	5.9	5	5.4	NaN	5.1	5.4	6	5.3	6.4	5.7	5.8
NaN	NaN	NaN	NaN	NaN	NaN	NaN	NaN	NaN	NaN	NaN	NaN	NaN	NaN	NaN	NaN	NaN	NaN	NaN	NaN	NaN	NaN	NaN	NaN	NaN	NaN	NaN	NaN	NaN	NaN	NaN	NaN	NaN	NaN	5.5	NaN	5.2	NaN	NaN	NaN	NaN	NaN	NaN	NaN	NaN	NaN	NaN	NaN	NaN	NaN
5.8	5.4	5.1	5.1	5	5.4	NaN	5.6	NaN	NaN	5.4	5.3	5.6	5.2	5.9	5.7	5.7	NaN	5.2	5.4	5	5.9	5.2	5.2	5.4	8.8	5.8	5.3	6.9	NaN	5.5	6.2	6	5.3	5.1	5.2	5.2	5.2	5.2	5.4	5	5.7	5.6	5.1	NaN	5.7	6.4	5.8	5.4	5.6
6.2	NaN	5.1	5.1	5	5.9	NaN	5.8	NaN	NaN	5.9	5.3	NaN	NaN	5.1	5.2	5.2	NaN	5.1	NaN	5	5.9	5.1	5	NaN	NaN	NaN	5.1	5.8	NaN	6.3	7.2	5.6	5.2	5.1	5.2	5.1	5.2	5.2	5.9	5	5.2	NaN	5.1	NaN	5.7	5.5	5.8	5.4	5.8
NaN	NaN	NaN	5.7	NaN	NaN	NaN	NaN	NaN	NaN	NaN	NaN	NaN	NaN	NaN	NaN	NaN	NaN	NaN	NaN	NaN	NaN	NaN	NaN	NaN	NaN	NaN	NaN	NaN	NaN	NaN	NaN	NaN	NaN	NaN	NaN	NaN	NaN	NaN	NaN	NaN	NaN	NaN	NaN	NaN	NaN	NaN	NaN	NaN	NaN
6.2	5.4	5.3	5.1	5.5	5.2	NaN	5.8	NaN	NaN	5.4	5.6	5.6	5.1	5.5	6	5.5	NaN	5.1	NaN	6	5.9	5.9	5.2	5.4	5.4	5.8	5.1	6	NaN	5.3	6.4	5.6	5.3	5.1	5.2	5.1	5.2	5.3	5.6	5	5.5	5.9	5.1	NaN	5.7	5.5	NaN	5.4	5.8
NaN	NaN	NaN	NaN	NaN	NaN	NaN	NaN	NaN	NaN	NaN	NaN	NaN	NaN	NaN	NaN	NaN	NaN	NaN	NaN	NaN	NaN	NaN	NaN	NaN	NaN	NaN	NaN	NaN	NaN	NaN	NaN	NaN	NaN	NaN	NaN	NaN	NaN	NaN	NaN	NaN	NaN	NaN	NaN	NaN	NaN	NaN	NaN	NaN	NaN
5.9	5.4	NaN	NaN	NaN	5.6	NaN	NaN	NaN	NaN	5.2	NaN	5.6	5.4	NaN	NaN	NaN	NaN	NaN	NaN	NaN	NaN	NaN	5.5	5.5	5.4	5.8	5.5	NaN	NaN	5.4	6.2	5.6	6.1	NaN	NaN	NaN	NaN	NaN	5.3	NaN	5.7	5.6	NaN	NaN	NaN	NaN	NaN	NaN	NaN
6.2	NaN	5.1	5.1	5	5.9	5.7	5.8	NaN	NaN	5.9	5.3	NaN	NaN	5.1	5.2	5.2	NaN	5.1	NaN	5	5.9	5.1	5	NaN	NaN	NaN	5.1	5.8	NaN	5.1	5	5.6	6.2	8.1	5.2	5.3	5.2	5.2	5.9	5	5.2	NaN	5.1	5.4	NaN	5.5	5.8	5.4	5.8
6.2	NaN	5.1	5.1	5	5.9	5.7	5.8	NaN	NaN	5.9	5.4	NaN	NaN	5.1	5.2	5.2	NaN	5.1	NaN	5	5.9	5.1	5	NaN	NaN	NaN	5.1	5.8	NaN	5.1	5	5.6	6.5	8.1	5.2	5.1	5.6	5.2	5.9	5	5.2	NaN	5.1	5.4	NaN	5.5	NaN	5.4	5.8
6.2	NaN	5.1	5.1	5	NaN	NaN	5.8	NaN	NaN	NaN	NaN	NaN	NaN	NaN	NaN	NaN	NaN	5.1	NaN	5	NaN	5.1	5	NaN	NaN	NaN	5.1	5	5.4	NaN	NaN	5.6	NaN	5.4	NaN	NaN	NaN	6	7.5	NaN	7.4	NaN	NaN	NaN	5.7	5.5	5.8	5.4	NaN
NaN	NaN	5.1	5.4	5	NaN	6.6	NaN	NaN	NaN	NaN	5.5	NaN	NaN	5.6	5.6	5.6	NaN	5.1	NaN	5.6	6.3	5.1	5	NaN	NaN	NaN	5.1	NaN	NaN	5.1	5	NaN	5.3	5.1	5.2	5.1	5.2	5.2	5.9	5	5.2	NaN	5.1	5.9	NaN	5.5	NaN	5.4	NaN
NaN	NaN	NaN	NaN	NaN	NaN	NaN	NaN	NaN	NaN	NaN	NaN	NaN	NaN	5.8	NaN	NaN	NaN	NaN	NaN	5.1	5.9	NaN	NaN	NaN	NaN	NaN	NaN	NaN	NaN	NaN	NaN	NaN	NaN	NaN	NaN	NaN	NaN	NaN	NaN	NaN	NaN	NaN	NaN	NaN	NaN	NaN	NaN	NaN	NaN
NaN	NaN	5.1	5.1	5	NaN	NaN	NaN	NaN	NaN	NaN	NaN	NaN	NaN	5.1	5.2	5.2	NaN	5.1	NaN	5	NaN	5.1	5	NaN	NaN	NaN	5.1	NaN	NaN	5.1	5	NaN	5.2	5.8	5.2	5.1	5.2	5.2	NaN	5	5.2	NaN	5.1	5.4	NaN	NaN	NaN	NaN	NaN
6.5	5.4	NaN	NaN	NaN	9	7.4	6.7	NaN	NaN	6.8	NaN	5.6	5.4	NaN	5.5	NaN	NaN	NaN	NaN	NaN	6.1	5.5	5.5	5.9	5.4	5.8	5.5	NaN	NaN	6	6.7	7.4	5.4	NaN	NaN	NaN	NaN	5.2	5.6	NaN	5.7	5.6	NaN	NaN	NaN	5.5	NaN	NaN	8.3
NaN	NaN	NaN	NaN	NaN	NaN	NaN	NaN	NaN	NaN	NaN	NaN	NaN	NaN	NaN	NaN	NaN	NaN	NaN	NaN	NaN	7.3	8.3	NaN	NaN	NaN	NaN	NaN	NaN	NaN	NaN	NaN	NaN	NaN	NaN	NaN	NaN	NaN	NaN	NaN	NaN	NaN	NaN	NaN	NaN	NaN	NaN	NaN	NaN	NaN
NaN	NaN	NaN	NaN	NaN	NaN	NaN	NaN	NaN	NaN	NaN	NaN	NaN	NaN	NaN	NaN	NaN	NaN	NaN	NaN	NaN	8.1	7	NaN	NaN	NaN	NaN	NaN	NaN	NaN	NaN	8.4	NaN	NaN	NaN	NaN	NaN	NaN	NaN	NaN	NaN	NaN	NaN	NaN	NaN	NaN	NaN	NaN	NaN	NaN
6.2	NaN	5.3	5.1	5.4	NaN	NaN	5.8	NaN	NaN	NaN	NaN	NaN	NaN	NaN	NaN	NaN	NaN	6.5	NaN	5.2	7.9	6.3	5.9	NaN	NaN	NaN	5.1	6.2	6	NaN	NaN	5.6	NaN	5.8	NaN	NaN	NaN	5.8	6.6	NaN	7.1	NaN	NaN	NaN	5.7	5.5	5.8	5.4	NaN
6.2	NaN	5.1	5.1	5	5.9	5.7	5.8	NaN	NaN	5.9	5.3	NaN	NaN	5.1	5.2	5.2	NaN	5.1	NaN	5	5.9	5.1	5.3	NaN	NaN	NaN	5.1	5.8	NaN	5.4	6.6	5.6	5.2	5.1	6.5	6.6	6.2	5.2	5.9	5	5.6	NaN	5.1	5.4	5.7	5.5	5.8	5.4	5.8
6.2	NaN	5.1	5.1	5.1	5.9	5.7	5.8	NaN	NaN	NaN	5.2	NaN	NaN	NaN	NaN	NaN	NaN	8.4	NaN	5	7.2	8.5	8.2	7.9	6.8	7.4	5.1	5.8	5.9	7.2	8	5.6	5.7	5.6	NaN	7.7	NaN	6.5	6.9	5	7.7	NaN	NaN	5.4	5.7	5.1	5.8	5.4	NaN
6.2	NaN	5.1	5.1	5	NaN	NaN	5.8	NaN	NaN	NaN	5.1	NaN	NaN	NaN	NaN	NaN	NaN	5.6	4	5.9	NaN	6.1	5.6	NaN	NaN	NaN	5.1	5	5.4	NaN	NaN	5.6	NaN	5.1	NaN	NaN	NaN	5.2	6.6	NaN	7.1	NaN	NaN	NaN	5.7	5.1	5.8	5.4	NaN
6.2	NaN	5.3	5.4	6.6	5.9	NaN	5.9	NaN	NaN	5.9	5.9	NaN	NaN	5.6	6.3	6.5	NaN	8.3	NaN	5.8	9.3	NaN	8	NaN	NaN	NaN	5.5	7.9	NaN	8	NaN	5.6	6.6	6.5	7.8	8.1	8.1	8.5	8.1	5.4	8.2	NaN	5.9	NaN	5.7	5.5	5.8	5.4	6.5
NaN	NaN	5.1	5.1	5	NaN	NaN	5.8	NaN	NaN	NaN	NaN	NaN	NaN	NaN	NaN	NaN	NaN	5.1	NaN	5	NaN	6.2	6.4	NaN	NaN	NaN	5.1	5	5.4	NaN	NaN	5.6	NaN	5.1	NaN	NaN	NaN	5.2	7	NaN	6.6	NaN	NaN	NaN	5.7	5.5	5.8	5.4	NaN
6.2	NaN	5.8	5.3	5.6	NaN	NaN	5.8	NaN	NaN	NaN	NaN	NaN	NaN	NaN	NaN	NaN	NaN	7.4	NaN	6.6	NaN	7.5	6.5	NaN	NaN	NaN	5.1	5.7	6	NaN	NaN	5.6	NaN	5.7	NaN	NaN	NaN	5.8	7.5	NaN	7.2	NaN	NaN	NaN	5.7	5.5	5.8	5.4	NaN
6.2	NaN	5.1	5.1	5	5.9	5.7	5.8	NaN	NaN	5.9	5.3	NaN	NaN	5.1	5.2	5.2	NaN	5.6	NaN	5	6.9	5.7	5	NaN	NaN	NaN	5.1	5.8	NaN	6.2	7.5	5.6	5.2	5.1	6.5	7	6.8	5.5	6.2	5	6.4	NaN	5.1	5.4	5.7	5.5	5.8	5.4	5.8
NaN	NaN	5.1	5.1	5	NaN	NaN	NaN	NaN	NaN	NaN	5.3	NaN	NaN	5.1	5.2	5.2	NaN	5.1	NaN	5	NaN	5.1	5	NaN	NaN	NaN	5.1	NaN	NaN	5.1	6.1	NaN	5.2	5.1	5.2	5.1	5.2	5.2	NaN	5	5.2	NaN	5.1	NaN	NaN	NaN	NaN	NaN	NaN
NaN	NaN	5.1	5.1	5	NaN	NaN	NaN	NaN	NaN	NaN	NaN	NaN	NaN	NaN	NaN	NaN	NaN	5.3	NaN	5	NaN	6	5.5	NaN	NaN	NaN	5.1	5.9	5.4	NaN	NaN	5.6	NaN	5.1	NaN	NaN	NaN	5.2	6.1	NaN	6.2	NaN	NaN	NaN	NaN	5.5	NaN	5.4	NaN
NaN	4.7	NaN	NaN	NaN	4.1	NaN	NaN	NaN	NaN	4	NaN	4.6	4.1	NaN	NaN	NaN	NaN	NaN	NaN	NaN	NaN	NaN	6.5	4.9	5.2	5.3	4.4	NaN	NaN	6	7.5	4	5.3	NaN	NaN	NaN	NaN	NaN	5.4	NaN	6.4	7	NaN	NaN	NaN	NaN	NaN	NaN	NaN
NaN	NaN	NaN	NaN	NaN	NaN	NaN	NaN	NaN	NaN	NaN	NaN	NaN	NaN	NaN	NaN	NaN	NaN	NaN	NaN	NaN	9.2	7.2	NaN	NaN	NaN	NaN	NaN	NaN	NaN	NaN	8.3	NaN	NaN	NaN	NaN	NaN	NaN	NaN	NaN	NaN	NaN	NaN	NaN	NaN	NaN	NaN	NaN	NaN	NaN
6.2	NaN	5.1	5.1	5	NaN	NaN	5.8	NaN	NaN	NaN	NaN	NaN	NaN	NaN	NaN	NaN	NaN	6.2	4	5.2	7.2	6.2	5.6	NaN	NaN	NaN	5.1	5.3	5.4	NaN	NaN	5.6	NaN	5.3	NaN	NaN	NaN	5.2	6.4	NaN	6.9	NaN	NaN	NaN	5.7	5.5	5.8	5.4	NaN
NaN	NaN	NaN	NaN	NaN	NaN	NaN	NaN	NaN	NaN	NaN	NaN	NaN	NaN	NaN	NaN	NaN	NaN	NaN	NaN	NaN	7.5	7.1	NaN	NaN	NaN	NaN	NaN	NaN	NaN	NaN	7.6	NaN	NaN	NaN	NaN	NaN	NaN	NaN	NaN	NaN	NaN	NaN	NaN	NaN	NaN	NaN	NaN	NaN	NaN
6.2	NaN	5.1	5.1	5.1	5.9	5.7	5.8	NaN	NaN	5.9	5.8	NaN	NaN	5.8	5.6	5.9	NaN	6.6	NaN	5.1	7.3	6.6	6	NaN	NaN	NaN	5.1	5.8	NaN	6.8	7.9	5.6	5.2	5.1	5.8	6	5.8	5.8	7.6	5.3	6.3	NaN	5.1	5.4	5.7	5.5	5.8	5.4	5.8
NaN	NaN	NaN	NaN	NaN	NaN	NaN	NaN	NaN	NaN	NaN	NaN	NaN	NaN	NaN	NaN	NaN	NaN	NaN	NaN	NaN	7.5	6.7	NaN	NaN	NaN	NaN	NaN	NaN	NaN	NaN	8	NaN	NaN	NaN	NaN	NaN	NaN	NaN	NaN	NaN	NaN	NaN	NaN	NaN	NaN	NaN	NaN	NaN	NaN
6.2	NaN	5.1	5.1	5	NaN	5.7	5.8	NaN	NaN	5.9	5.3	NaN	NaN	5.1	5.2	5.2	NaN	5.1	NaN	5	5.9	5.1	5	NaN	NaN	NaN	5.1	5.8	NaN	5.1	5	5.6	5.2	6.9	5.2	5.1	5.2	5.2	5.9	5	5.2	NaN	5.1	5.4	7.4	5.5	6.6	5.4	5.8
6.2	NaN	6.1	5.4	5.4	NaN	NaN	5.8	NaN	NaN	NaN	5.1	NaN	NaN	NaN	NaN	NaN	NaN	6.3	NaN	6.3	NaN	6.6	6.1	NaN	NaN	NaN	5.1	6.2	5.6	NaN	NaN	5.6	NaN	5.7	NaN	NaN	NaN	6	6.5	NaN	7.4	NaN	NaN	NaN	5.7	5.1	5.8	5.4	NaN
6.2	NaN	5.1	5.1	5	NaN	NaN	5.8	NaN	NaN	NaN	5.1	NaN	NaN	NaN	NaN	NaN	NaN	5.1	NaN	6.1	NaN	5.3	5	NaN	NaN	NaN	5.1	5	5.4	NaN	NaN	5.6	NaN	5.1	NaN	NaN	NaN	5.2	5.9	NaN	6.9	NaN	NaN	NaN	5.7	5.1	5.8	5.4	NaN
6.2	NaN	5.1	5.1	5	5.9	5.7	5.8	NaN	NaN	NaN	5.2	NaN	NaN	NaN	NaN	NaN	NaN	5.1	NaN	5	5.9	5.1	5	NaN	NaN	NaN	5.1	5.3	5.4	5.3	6.6	5.6	5.2	5.1	NaN	6.1	NaN	5.2	5.9	5	6.5	NaN	NaN	5.4	5.7	5.1	5.8	5.4	NaN
6.2	NaN	5.9	5.3	5.4	5.9	5.7	5.8	NaN	NaN	5.9	5.2	NaN	NaN	5.2	5.2	5.2	NaN	5.8	NaN	5.8	6.3	5.9	5.9	NaN	NaN	NaN	5.1	5.2	5.4	7.9	8	5.6	5.6	6.1	5.7	6.3	6.1	6.5	5.9	5	7.5	NaN	5.1	5.4	5.7	5.3	5.8	5.4	5.8
6.2	NaN	5.9	5.6	5.3	5.9	5.7	5.8	NaN	NaN	5.9	5.2	NaN	NaN	5.1	5.2	5.2	NaN	6	NaN	6.7	6.9	6.6	6.2	NaN	NaN	NaN	5.1	5.3	5.4	7.1	7.5	5.6	5.2	5.9	5.2	5.6	5.2	6.8	6.6	5	7.7	NaN	6	5.4	5.7	5.3	5.8	5.4	5.8
NaN	NaN	5.1	5.1	5	5.9	5.7	5.8	NaN	NaN	5.9	5.2	NaN	NaN	5.1	5.2	5.2	NaN	5.1	NaN	5	5.9	5.2	5	NaN	NaN	NaN	5.1	5.3	5.4	6.5	7.1	5.6	5.2	5.1	5.2	5.1	5.2	5.3	5.9	5	6.7	NaN	5.1	5.4	5.7	5.5	5.8	6	5.8
6.2	NaN	5.1	5.1	5	5.9	5.7	5.8	NaN	NaN	5.9	5.2	NaN	NaN	5.1	5.2	5.2	NaN	5.1	NaN	5	5.9	5.2	5	NaN	NaN	NaN	5.1	5.3	5.4	5.7	6.6	5.6	5.2	5.1	5.2	5.1	5.2	5.2	5.9	5	5.8	NaN	5.1	5.4	5.7	5.5	5.8	5.4	5.8
NaN	NaN	NaN	NaN	NaN	NaN	NaN	NaN	NaN	NaN	NaN	NaN	NaN	NaN	NaN	NaN	NaN	NaN	NaN	NaN	NaN	8	6.4	NaN	NaN	NaN	NaN	NaN	NaN	NaN	NaN	8.4	NaN	NaN	NaN	NaN	NaN	NaN	NaN	NaN	NaN	NaN	NaN	NaN	NaN	NaN	NaN	NaN	NaN	NaN
6.2	NaN	5.1	5.1	5	NaN	5.7	5.8	NaN	NaN	5.9	5.3	NaN	NaN	5.1	5.2	5.2	NaN	5.8	4	5	6.4	5.9	5.8	NaN	NaN	NaN	5.1	5.8	NaN	6.9	7.9	5.6	5.3	6	5.3	6	5.8	6.2	6	5	7.5	NaN	6.4	5.4	5.7	5.5	5.8	5.4	5.8
NaN	NaN	NaN	NaN	NaN	NaN	NaN	NaN	NaN	NaN	NaN	NaN	NaN	NaN	NaN	NaN	NaN	NaN	NaN	NaN	NaN	NaN	NaN	NaN	NaN	NaN	NaN	NaN	NaN	NaN	NaN	NaN	NaN	NaN	5.6	NaN	NaN	NaN	NaN	NaN	NaN	NaN	NaN	NaN	NaN	NaN	NaN	NaN	NaN	NaN
NaN	NaN	5.1	5.1	5	NaN	NaN	NaN	NaN	NaN	NaN	5.2	NaN	NaN	5.1	5.2	5.2	NaN	5.1	NaN	5	NaN	5.1	5	NaN	NaN	NaN	5.1	NaN	NaN	5.1	5	NaN	5.2	6.1	5.2	5.1	5.2	5.2	NaN	5	5.2	NaN	5.1	NaN	5.8	NaN	NaN	NaN	NaN
NaN	NaN	NaN	NaN	NaN	NaN	NaN	NaN	NaN	NaN	NaN	NaN	NaN	NaN	NaN	NaN	NaN	NaN	NaN	4	NaN	NaN	NaN	NaN	NaN	5.4	NaN	NaN	NaN	NaN	NaN	NaN	NaN	NaN	NaN	NaN	NaN	NaN	NaN	NaN	NaN	NaN	NaN	NaN	NaN	NaN	NaN	NaN	NaN	NaN
6.2	NaN	5.1	5.1	5	5.9	5.7	5.8	NaN	NaN	5.9	5.2	NaN	NaN	5.1	5.2	5.2	NaN	5.1	NaN	5	5.9	5.1	5	NaN	NaN	NaN	5.1	5.4	5.4	5.1	5.2	5.6	5.2	5.1	5.2	5.1	5.2	5.3	5.9	5	5.2	NaN	5.1	5.4	5.7	5.3	5.8	5.4	5.8
6.4	NaN	5.7	5.6	5.5	5.9	5.7	5.8	NaN	NaN	5.9	5.3	NaN	NaN	5.1	5.2	5.2	NaN	5.1	NaN	7.1	5.9	5.1	5.4	NaN	NaN	NaN	5.3	6.2	NaN	5.3	6.6	5.6	5.2	5.1	6.3	5.8	6.3	5.2	6	5	5.2	NaN	5.1	5.4	5.7	5.5	5.8	5.4	5.8
NaN	NaN	5.1	5.1	5	5.9	5.7	5.8	NaN	NaN	NaN	5.3	NaN	NaN	5.1	5.2	5.2	NaN	5.1	4	6.8	NaN	5.1	5.1	NaN	NaN	NaN	6.1	6.1	NaN	5.1	6.1	5.6	5.2	5.1	6.8	5.9	6.6	5.2	5.9	5	5.5	NaN	5.1	5.4	5.7	5.5	5.8	5.4	5.8
NaN	NaN	5.1	5.1	5	NaN	5.7	NaN	NaN	NaN	NaN	5.3	NaN	NaN	5.1	5.2	5.2	NaN	5.1	NaN	6.7	NaN	5.1	5.2	NaN	NaN	NaN	5.1	6	NaN	5.1	5	5.6	5.2	5.1	5.2	5.1	6	5.2	NaN	5	5.6	NaN	5.1	5.4	5.7	5.5	NaN	5.4	5.8
6.2	NaN	5.2	5.1	5	5.9	5.7	5.8	NaN	NaN	5.9	5.3	NaN	NaN	5.1	5.2	5.2	NaN	5.1	NaN	7.1	5.9	5.1	5	NaN	NaN	NaN	6.3	6.5	NaN	5.1	6.1	5.6	5.2	5.1	6.5	6.3	6.8	5.2	5.9	5	5.2	NaN	5.1	5.4	5.7	5.5	5.8	5.4	5.8
5.6	5.4	NaN	NaN	NaN	8.9	6.9	5.8	NaN	NaN	5.2	NaN	5.6	5.4	NaN	NaN	NaN	NaN	NaN	NaN	NaN	6.2	NaN	5.5	5.6	5.4	5.8	5.6	NaN	NaN	7.5	7.7	5.6	5.9	NaN	NaN	NaN	NaN	6.2	7	NaN	5.8	5.9	NaN	NaN	NaN	5.5	NaN	NaN	8.8
4.2	NaN	NaN	NaN	NaN	4.1	NaN	NaN	NaN	NaN	NaN	NaN	4.3	4	NaN	NaN	NaN	NaN	NaN	NaN	NaN	NaN	NaN	5.1	4	4.7	5.3	4.2	NaN	NaN	NaN	5.5	4.4	4.5	NaN	NaN	NaN	NaN	NaN	4.8	NaN	5	5.1	NaN	NaN	NaN	NaN	NaN	NaN	NaN
6.2	NaN	5.1	5.1	5	6.2	6.6	7.2	NaN	NaN	NaN	5.2	NaN	NaN	5.1	5.2	5.2	NaN	5.4	4	5	5.9	5.5	5	NaN	NaN	NaN	5.4	6	5.4	6.2	6.1	6.2	5.2	5.1	5.6	5.3	NaN	6.8	8.6	5	6.1	NaN	NaN	5.4	5.7	5.5	5.8	5.4	NaN
NaN	NaN	5.1	5.1	5	5.9	5.7	5.8	NaN	NaN	5.9	5.2	NaN	NaN	5.1	5.2	5.2	NaN	5.1	NaN	5	5.9	5.1	5	NaN	NaN	NaN	5.1	5.3	5.4	5.1	5.5	5.6	5.2	5.1	5.2	5.1	5.2	5.7	5.9	5	5.6	NaN	5.1	5.4	5.7	5.1	5.8	5.4	5.8
NaN	NaN	5.1	5.1	5	NaN	NaN	NaN	NaN	NaN	NaN	5.2	NaN	NaN	5.1	5.2	5.2	NaN	5.1	NaN	5	NaN	5.1	5	NaN	NaN	NaN	5.1	5.3	5.4	5.4	6.4	5.6	5.2	5.1	5.2	5.1	5.2	5.2	NaN	5	5.2	NaN	5.1	5.4	NaN	5.5	NaN	5.4	NaN
NaN	NaN	NaN	NaN	NaN	NaN	NaN	NaN	NaN	NaN	NaN	NaN	NaN	NaN	NaN	NaN	NaN	NaN	NaN	NaN	NaN	7.7	5.1	NaN	NaN	NaN	NaN	NaN	NaN	NaN	NaN	5.9	NaN	NaN	NaN	NaN	NaN	NaN	NaN	NaN	NaN	NaN	NaN	NaN	NaN	NaN	NaN	NaN	NaN	NaN
4.2	NaN	NaN	NaN	NaN	NaN	NaN	NaN	NaN	NaN	4.3	NaN	NaN	NaN	NaN	NaN	NaN	NaN	NaN	NaN	NaN	NaN	NaN	NaN	4.7	NaN	NaN	NaN	NaN	NaN	NaN	4.2	NaN	4.4	NaN	NaN	NaN	NaN	NaN	NaN	NaN	NaN	4.1	NaN	NaN	NaN	NaN	NaN	NaN	NaN
NaN	NaN	4.1	4.1	4	NaN	NaN	NaN	NaN	NaN	NaN	NaN	NaN	NaN	NaN	NaN	NaN	NaN	NaN	NaN	NaN	NaN	NaN	NaN	NaN	NaN	NaN	4.1	NaN	NaN	NaN	NaN	4.6	NaN	NaN	NaN	NaN	NaN	NaN	NaN	NaN	NaN	NaN	NaN	NaN	NaN	NaN	NaN	NaN	NaN
NaN	4.1	NaN	NaN	NaN	4.1	NaN	NaN	NaN	NaN	NaN	NaN	4.6	4.2	NaN	NaN	NaN	NaN	NaN	NaN	NaN	NaN	NaN	5.3	5	4.8	5	4.2	NaN	NaN	5.2	7.1	4.4	5	NaN	NaN	NaN	NaN	NaN	5.7	NaN	5.3	5.7	NaN	NaN	NaN	NaN	NaN	NaN	NaN
6.2	NaN	5.1	5.1	5	NaN	NaN	5.8	NaN	NaN	NaN	NaN	NaN	NaN	NaN	NaN	NaN	NaN	5.6	NaN	5.4	NaN	6	5.1	NaN	NaN	NaN	5.1	5	5.4	NaN	NaN	5.6	NaN	5.1	NaN	NaN	NaN	5.2	5.9	NaN	6.5	NaN	NaN	NaN	5.7	5.5	5.8	5.4	NaN
6.2	NaN	5.5	5.1	5	5.9	NaN	5.8	NaN	NaN	5.9	5.3	NaN	NaN	5.1	5.2	5.2	NaN	5.1	4	5	5.9	5.1	5	NaN	NaN	NaN	5.1	5.8	NaN	6.6	7.5	5.6	5.2	5.3	5.4	5.1	5.2	5.2	5.9	5	8.2	NaN	5.1	NaN	5.7	5.5	5.8	5.4	5.8
5.4	5.5	NaN	NaN	NaN	5.2	NaN	NaN	NaN	NaN	5.2	NaN	5.6	5.1	NaN	NaN	NaN	NaN	NaN	NaN	NaN	NaN	NaN	5.5	5.4	7	5.8	NaN	NaN	NaN	5.4	7	5.6	5.5	NaN	NaN	NaN	NaN	NaN	5.3	NaN	5.7	6.1	NaN	NaN	NaN	NaN	NaN	NaN	NaN
6.2	NaN	5.1	5.1	5	5.9	6	5.8	NaN	NaN	6.2	5.2	NaN	NaN	5.1	5.3	5.4	NaN	5.1	NaN	5.3	6.9	5.3	5	NaN	NaN	NaN	5.1	5.3	5.4	6	7	5.6	5.2	5.6	5.2	5.1	5.2	6.9	6.8	5	7	NaN	5.1	5.4	5.7	5.1	5.8	5.4	5.8
NaN	NaN	5.1	5.1	5	5.2	NaN	NaN	NaN	NaN	NaN	5.3	NaN	NaN	5.1	5.2	5.2	NaN	5.1	NaN	5	NaN	5.1	5	NaN	NaN	NaN	5.1	5.8	NaN	5.1	5	5.6	5.2	5.1	5.2	5.1	5.2	5.2	NaN	5	6.5	NaN	5.1	NaN	5.7	5.5	NaN	5.4	5.8
6.2	NaN	5.1	5.1	5	5.9	5.7	5.8	NaN	NaN	5.9	5.3	NaN	NaN	5.1	5.2	5.2	NaN	5.1	NaN	5	5.9	5.1	5	NaN	NaN	NaN	5.1	5.8	NaN	6.6	7.8	NaN	6	6.4	6.1	6.6	5.4	5.2	5.9	5	5.8	NaN	5.1	5.4	5.7	5.5	5.8	5.4	5.8
NaN	NaN	5.1	5.1	5.6	6	NaN	NaN	NaN	NaN	NaN	NaN	NaN	NaN	NaN	NaN	NaN	NaN	NaN	NaN	NaN	9	NaN	NaN	NaN	NaN	NaN	5.1	NaN	NaN	NaN	NaN	7	NaN	NaN	NaN	NaN	NaN	NaN	NaN	NaN	NaN	NaN	NaN	NaN	5.7	NaN	5.8	NaN	NaN
6.2	NaN	5.9	5.4	6.2	5.9	NaN	5.8	NaN	NaN	5.9	5.9	NaN	NaN	7.1	NaN	8.4	NaN	8.2	NaN	NaN	8.3	NaN	NaN	8.4	NaN	NaN	5.7	5.8	NaN	8.3	NaN	7	7.3	7.6	7	6.8	7.3	5.6	6.8	6	8.5	NaN	5.8	NaN	5.7	5.5	5.8	5.4	6
NaN	NaN	NaN	5.1	5	5.9	NaN	5.8	NaN	NaN	NaN	5.8	NaN	NaN	5.5	6.1	6.2	NaN	6.6	NaN	5	5.9	6.5	5.8	NaN	NaN	NaN	5.1	5.8	NaN	5.7	5.5	5.6	5.2	5.8	6.2	5.7	5.4	5.3	5.9	5	5.5	NaN	5.1	NaN	5.7	5.5	5.8	5.4	5.8
6.2	NaN	5.1	5.1	5	5.9	5.7	5.8	NaN	NaN	NaN	5.2	NaN	NaN	NaN	NaN	NaN	NaN	5.1	NaN	5	5.9	5.1	5	NaN	NaN	NaN	8.2	5.9	5.4	5.1	5	5.6	5.2	5.1	NaN	5.1	NaN	5.2	5.9	5	5.2	NaN	NaN	5.4	5.7	5.5	5.8	5.4	NaN
6.2	NaN	5.4	5.3	5.1	5.9	5.7	5.8	NaN	NaN	NaN	5.2	NaN	NaN	NaN	NaN	NaN	NaN	5.1	NaN	5	5.9	5.5	5	NaN	NaN	NaN	8.4	5.3	5.4	5.1	5	8.9	5.2	5.1	NaN	5.1	NaN	5.2	5.9	5	5.5	NaN	NaN	5.4	5.7	5.1	5.8	5.4	NaN
NaN	5.4	NaN	NaN	NaN	5.2	NaN	NaN	NaN	NaN	5.2	NaN	NaN	5.4	NaN	NaN	NaN	NaN	NaN	NaN	NaN	NaN	NaN	NaN	5.4	5.4	NaN	6.4	NaN	NaN	NaN	5.7	NaN	5.4	NaN	NaN	NaN	NaN	NaN	5.3	NaN	NaN	NaN	NaN	NaN	NaN	NaN	NaN	NaN	NaN
6.2	NaN	5.1	5.1	5	NaN	NaN	7.5	NaN	NaN	NaN	5.1	NaN	NaN	NaN	NaN	NaN	NaN	7.8	4	5	NaN	5.1	5	NaN	6.4	NaN	5.1	5.8	5.4	NaN	NaN	5.6	NaN	5.1	NaN	NaN	NaN	5.2	5.9	NaN	5.2	NaN	NaN	NaN	6.4	5.5	5.8	5.7	NaN
6.2	NaN	5.1	5.1	5	NaN	NaN	6.2	NaN	NaN	NaN	5.1	NaN	NaN	NaN	NaN	NaN	NaN	5.1	NaN	NaN	NaN	5.1	5	NaN	NaN	NaN	NaN	5	5.4	NaN	NaN	8.2	NaN	5.1	NaN	NaN	NaN	6.1	5.9	NaN	5.2	NaN	NaN	NaN	5.7	5.5	5.8	5.4	NaN
6.2	NaN	5.1	5.1	5	5.9	5.7	5.8	NaN	NaN	5.9	5.3	NaN	NaN	5.5	5.6	5.6	NaN	5.2	NaN	6.3	7.4	5.1	5	5.8	NaN	NaN	5.1	5.8	NaN	5.8	6.9	5.6	5.3	5.3	6	6.4	5.7	7	6.1	5	6.5	NaN	5.6	NaN	5.7	5.5	5.8	NaN	5.8
NaN	NaN	4.1	4.1	4	4.5	NaN	NaN	NaN	NaN	4.1	NaN	4.5	NaN	NaN	NaN	NaN	NaN	NaN	4	NaN	NaN	NaN	4.5	NaN	NaN	4.2	5	NaN	NaN	NaN	5.9	4.8	4.2	NaN	NaN	NaN	NaN	NaN	4.6	NaN	4.1	4.4	NaN	NaN	4.7	NaN	4.8	NaN	NaN
6.2	NaN	5.1	5.1	5	5.9	5.7	5.8	NaN	NaN	5.9	5.3	NaN	NaN	5.1	5.2	5.4	NaN	5.1	4	5	5.9	5.1	5	NaN	NaN	NaN	5.1	8	NaN	6.9	6.2	5.6	5.3	5.3	6.1	5.2	5.6	5.2	5.9	5	6.2	NaN	5.1	NaN	5.7	5.5	5.8	5.4	5.8
6.2	NaN	5.1	5.1	5	5.9	5.7	5.8	NaN	NaN	5.9	5.1	NaN	NaN	5.1	5.2	5.3	NaN	5.1	NaN	5	5.9	5.1	5	NaN	NaN	NaN	5.1	7.2	NaN	6.4	6.1	5.6	5.2	5.3	5.6	5.4	5.2	5.2	5.9	5	5.4	NaN	5.1	NaN	5.7	5.5	5.8	5.4	5.8
6.2	NaN	5.1	5.1	5	5.8	NaN	5.8	NaN	NaN	NaN	5.1	NaN	NaN	NaN	NaN	NaN	NaN	5.1	4	5	NaN	5.1	5	NaN	NaN	NaN	5.1	7.7	5.4	NaN	NaN	5.6	NaN	6.4	NaN	NaN	NaN	5.2	5.9	NaN	6.1	NaN	NaN	NaN	5.7	5.1	5.8	5.4	NaN
6.2	NaN	5.2	5.1	5	NaN	NaN	5.8	NaN	NaN	NaN	5.1	NaN	NaN	NaN	NaN	NaN	NaN	5.1	NaN	5	NaN	5.1	5	NaN	NaN	NaN	5.1	5	5.4	NaN	NaN	6.7	NaN	5.2	NaN	NaN	NaN	5.2	5.9	NaN	5.2	NaN	NaN	NaN	5.7	5.1	5.8	5.4	NaN
5.6	5.9	NaN	NaN	NaN	5.2	NaN	NaN	NaN	NaN	5.2	NaN	5.6	5.4	NaN	NaN	NaN	NaN	NaN	NaN	NaN	NaN	NaN	6.8	6	7.1	6.4	5.7	NaN	NaN	6.3	7.8	5.6	5.8	NaN	NaN	NaN	NaN	NaN	5.4	NaN	6.9	7.4	NaN	NaN	NaN	NaN	NaN	NaN	NaN
NaN	NaN	NaN	NaN	NaN	NaN	NaN	NaN	NaN	NaN	NaN	NaN	NaN	NaN	NaN	NaN	NaN	NaN	NaN	NaN	NaN	NaN	NaN	NaN	NaN	NaN	NaN	NaN	NaN	NaN	NaN	NaN	NaN	NaN	NaN	NaN	NaN	NaN	4.9	NaN	NaN	NaN	NaN	NaN	NaN	NaN	NaN	NaN	NaN	NaN
NaN	NaN	NaN	NaN	NaN	NaN	NaN	NaN	NaN	NaN	NaN	NaN	NaN	NaN	NaN	NaN	NaN	NaN	NaN	NaN	NaN	NaN	NaN	NaN	NaN	NaN	NaN	5.8	NaN	NaN	NaN	NaN	NaN	NaN	NaN	NaN	NaN	NaN	NaN	NaN	NaN	NaN	NaN	NaN	NaN	NaN	NaN	NaN	NaN	NaN
NaN	NaN	5.1	5.1	5	5.9	5.7	5.8	NaN	NaN	5.9	5.3	NaN	NaN	5.1	5.2	5.2	NaN	5.1	NaN	5	5.9	5.1	5	5.8	NaN	NaN	6.9	5.8	NaN	5.3	6.2	5.6	5.2	5.2	5.2	5.2	5.2	6.9	5.9	5	6.5	NaN	5.1	NaN	5.7	5.5	5.8	NaN	5.8
6.1	7.8	NaN	NaN	NaN	5.8	NaN	NaN	NaN	NaN	5.2	NaN	5.6	5.4	NaN	NaN	NaN	NaN	NaN	NaN	NaN	NaN	NaN	7.8	5.4	5.9	6.8	6.4	NaN	NaN	5.4	6.3	5.6	5.4	NaN	NaN	NaN	NaN	NaN	6.1	NaN	6	6.5	NaN	NaN	NaN	NaN	NaN	NaN	NaN
NaN	NaN	NaN	NaN	NaN	5.8	NaN	NaN	NaN	NaN	NaN	NaN	NaN	NaN	NaN	NaN	NaN	NaN	NaN	NaN	NaN	NaN	NaN	NaN	NaN	NaN	NaN	NaN	NaN	NaN	NaN	5.6	NaN	NaN	NaN	NaN	NaN	NaN	NaN	NaN	NaN	NaN	5.7	NaN	NaN	NaN	NaN	NaN	NaN	NaN
6.2	NaN	6.9	6.5	6.5	5.7	NaN	5.8	NaN	NaN	6.4	5.3	NaN	NaN	5.1	5.9	5.2	NaN	5.1	NaN	5	6.1	5.1	5	NaN	NaN	NaN	5.1	5.8	NaN	5.1	5	5.7	5.2	5.1	5.4	5.1	5.2	7.1	5.9	5	5.2	NaN	6.9	NaN	5.7	5.5	7.4	5.4	5.8
NaN	NaN	5.3	5.1	5	NaN	NaN	NaN	NaN	NaN	NaN	5.1	NaN	NaN	NaN	NaN	NaN	NaN	5.1	NaN	5	NaN	5.1	5	NaN	NaN	NaN	5.1	NaN	NaN	NaN	NaN	NaN	NaN	5.1	NaN	NaN	NaN	5.2	6	NaN	5.2	NaN	NaN	NaN	NaN	NaN	NaN	NaN	NaN
8.5	6.4	5.1	5.1	5	6.7	8.8	8.6	NaN	NaN	7.6	6	6	5.4	5.2	5.5	5.3	NaN	5.1	NaN	5	5.9	5.1	5.5	5.4	6.8	5.8	5.5	7.1	NaN	5.4	6	8.5	5.4	5.9	5.8	5.7	5.2	5.2	5.3	5	5.7	5.6	5.1	5.4	6.3	7.2	6.3	6.7	7.3
8.8	7	NaN	NaN	NaN	6.5	NaN	NaN	NaN	NaN	7.2	NaN	5.9	5.4	NaN	NaN	NaN	NaN	NaN	NaN	NaN	NaN	NaN	5.5	5.4	7.7	5.8	5.5	NaN	NaN	5.4	5.6	8	5.4	NaN	NaN	NaN	NaN	NaN	5.3	NaN	5.7	5.6	NaN	NaN	NaN	NaN	NaN	NaN	NaN
8.5	6.7	5.1	5.1	5	5.9	8.2	8	NaN	NaN	6.6	5.3	5.6	5.4	5.1	5.2	5.2	NaN	5.1	NaN	5	5.9	5.1	5.2	5.4	6.7	5.9	5.2	5.8	NaN	5.2	5.2	8.2	5.3	5.1	5.2	5.1	5.2	5.2	5.5	5	5.4	5.6	5.1	5.4	NaN	5.9	NaN	5.4	7.4
6.2	NaN	6.1	5.5	6	NaN	NaN	5.9	NaN	NaN	NaN	5.1	NaN	NaN	NaN	NaN	NaN	NaN	6.5	NaN	5.5	NaN	6.9	6.7	NaN	NaN	NaN	5.6	7.4	6.8	NaN	NaN	5.6	NaN	6.4	NaN	NaN	NaN	5.2	6.2	NaN	6.5	NaN	NaN	NaN	6.8	5.1	5.8	5.4	NaN
5.6	5.5	6.6	5.7	6.6	5.4	6.3	5.8	NaN	NaN	5.4	5.5	5.6	5.3	5.5	6.8	6.3	5.6	7.5	6.4	6.2	7.9	7.9	5.8	NaN	5.4	5.8	5.9	7.7	NaN	5.6	7.5	5.6	5.4	6.9	5.6	5.9	5.2	7	7.1	5.6	6	6.2	6.1	NaN	5.7	5.5	5.8	5.4	5.8
NaN	NaN	5.1	5.1	5	NaN	NaN	NaN	NaN	NaN	NaN	5.1	NaN	NaN	NaN	NaN	NaN	NaN	5.1	NaN	5	NaN	5.1	5	NaN	NaN	NaN	5.1	NaN	5.4	NaN	NaN	NaN	NaN	5.1	NaN	NaN	NaN	5.2	NaN	NaN	5.2	NaN	NaN	NaN	NaN	5.5	NaN	5.4	NaN
5.8	5.5	NaN	NaN	NaN	5.6	NaN	NaN	NaN	NaN	5.4	NaN	6.3	6	NaN	NaN	NaN	NaN	NaN	NaN	NaN	NaN	NaN	5.6	6.2	6.2	6.4	6	NaN	NaN	5.4	6.2	5.8	6	NaN	NaN	NaN	NaN	NaN	5.4	NaN	6.2	6.1	NaN	NaN	NaN	NaN	NaN	NaN	NaN
6.1	5.5	NaN	NaN	NaN	7.3	NaN	NaN	NaN	NaN	5.2	NaN	5.6	5.4	NaN	5.5	NaN	NaN	NaN	NaN	NaN	NaN	5.5	5.4	5.4	5.4	5.8	5.5	NaN	NaN	5.5	5.7	6.5	5.4	NaN	NaN	NaN	NaN	NaN	5.4	NaN	5.7	5.6	NaN	NaN	NaN	NaN	NaN	NaN	NaN
5.6	5.4	NaN	NaN	NaN	5.2	NaN	NaN	NaN	NaN	5.2	NaN	5.6	5.4	NaN	NaN	NaN	NaN	NaN	NaN	NaN	NaN	NaN	5.5	5.4	5.4	NaN	5.5	NaN	NaN	5.4	5.6	5.6	5.4	NaN	NaN	NaN	NaN	NaN	5.3	NaN	NaN	5.6	NaN	NaN	NaN	NaN	NaN	NaN	NaN
5.6	6.9	NaN	NaN	NaN	5.2	NaN	NaN	NaN	NaN	5.2	NaN	5.6	5.4	NaN	NaN	NaN	NaN	NaN	NaN	NaN	NaN	NaN	5.5	5.4	5.4	5.8	5.5	NaN	NaN	5.4	5.6	5.6	5.4	NaN	NaN	NaN	NaN	NaN	5.3	NaN	5.7	5.6	NaN	NaN	NaN	NaN	NaN	NaN	NaN
NaN	5.4	NaN	NaN	NaN	5.2	NaN	NaN	NaN	NaN	5.2	NaN	NaN	5.4	NaN	NaN	NaN	NaN	NaN	NaN	NaN	NaN	NaN	5.5	5.4	5.4	NaN	5.5	NaN	NaN	5.4	NaN	NaN	5.4	NaN	NaN	NaN	NaN	NaN	5.3	NaN	NaN	NaN	NaN	NaN	NaN	NaN	NaN	NaN	NaN
6.2	NaN	5.1	5.1	5	5.9	6.7	7.6	NaN	NaN	6	5.2	NaN	NaN	5.1	5.2	5.2	NaN	5.1	NaN	5	5.9	5.1	5	5.8	NaN	NaN	5.1	5.8	NaN	5.1	5	5.9	5.2	5.3	5.3	5.3	5.2	5.2	5.9	5	5.2	NaN	5.1	5.4	7.5	5.5	7.1	7.7	6.6
NaN	NaN	NaN	5.1	5	5.9	NaN	7.3	NaN	NaN	NaN	5.1	NaN	NaN	5.1	5.2	5.2	NaN	5.1	NaN	5	5.9	5.1	5	NaN	NaN	NaN	5.1	5.8	NaN	5.1	5	6	5.2	6.2	5.2	5.1	5.2	5.2	5.9	5	5.2	NaN	5.1	NaN	8.4	7	8.2	8.2	5.8
NaN	NaN	NaN	NaN	NaN	NaN	NaN	NaN	NaN	NaN	NaN	NaN	NaN	NaN	NaN	NaN	NaN	NaN	NaN	6.2	NaN	NaN	NaN	NaN	NaN	NaN	NaN	NaN	NaN	NaN	NaN	NaN	NaN	NaN	NaN	NaN	NaN	NaN	NaN	NaN	NaN	NaN	NaN	NaN	NaN	NaN	NaN	NaN	NaN	NaN
5.6	5.4	NaN	NaN	NaN	5.2	NaN	NaN	NaN	NaN	7.7	NaN	5.6	5.4	NaN	NaN	NaN	NaN	NaN	NaN	NaN	NaN	NaN	5.5	5.4	5.4	5.8	5.5	NaN	NaN	5.4	5.6	5.6	5.4	NaN	NaN	NaN	NaN	NaN	5.3	NaN	5.7	5.6	NaN	NaN	NaN	NaN	NaN	NaN	NaN
7	NaN	NaN	NaN	NaN	7	5.9	5.8	NaN	NaN	5.2	NaN	NaN	NaN	NaN	NaN	NaN	NaN	NaN	NaN	NaN	6.1	NaN	NaN	NaN	NaN	NaN	NaN	NaN	NaN	NaN	7	6.4	NaN	NaN	NaN	NaN	NaN	5.2	NaN	NaN	5.9	NaN	NaN	NaN	NaN	5.5	NaN	NaN	6.7
5.8	5.7	NaN	NaN	NaN	6.3	NaN	NaN	NaN	NaN	5.3	NaN	5.6	5.4	NaN	NaN	NaN	NaN	NaN	NaN	NaN	NaN	NaN	NaN	6.1	6	5.8	NaN	NaN	NaN	5.5	NaN	5.6	5.6	NaN	NaN	NaN	NaN	NaN	5.6	NaN	5.7	6.2	NaN	NaN	NaN	NaN	NaN	NaN	NaN
5.4	5.4	NaN	NaN	NaN	5.2	NaN	NaN	NaN	NaN	5.2	NaN	NaN	5.1	NaN	NaN	NaN	NaN	NaN	NaN	NaN	NaN	NaN	NaN	NaN	6.4	NaN	NaN	NaN	NaN	NaN	NaN	NaN	5.4	NaN	NaN	NaN	NaN	NaN	5.3	NaN	NaN	NaN	NaN	NaN	NaN	NaN	NaN	NaN	NaN
6.2	NaN	5.1	5.1	5	5.9	5.7	5.8	NaN	NaN	5.9	5.3	NaN	NaN	5.1	5.2	5.2	NaN	5.1	4	5	5.9	5.1	5	NaN	NaN	NaN	5.1	5.8	NaN	5.1	5.6	5.6	5.2	5.1	5.2	5.1	5.2	5.2	5.9	5	5.2	NaN	5.1	5.4	5.7	5.5	5.8	5.4	5.8
NaN	NaN	NaN	NaN	NaN	NaN	NaN	NaN	NaN	NaN	NaN	NaN	NaN	NaN	NaN	NaN	NaN	NaN	NaN	NaN	NaN	NaN	NaN	NaN	NaN	NaN	NaN	NaN	NaN	NaN	NaN	NaN	NaN	NaN	NaN	NaN	NaN	NaN	NaN	NaN	NaN	NaN	NaN	NaN	NaN	NaN	NaN	NaN	NaN	NaN
6	6.2	5.3	5.1	5.2	5.7	6.2	5.8	NaN	NaN	5.4	5.5	5.8	6.1	6.5	7.1	6.7	NaN	7.4	NaN	5.7	6.5	6.3	6.3	6.2	6.7	6.8	5.8	5.8	NaN	8.2	NaN	5.7	5.4	6.2	5.2	5.5	5.8	5.8	5.9	5	NaN	8.4	6.2	5.4	5.7	5.8	5.8	5.4	5.8
6.3	NaN	5.4	5.1	5.9	6.5	NaN	7.3	NaN	NaN	5.9	5.3	NaN	NaN	6	7.1	7	NaN	7.6	NaN	7.8	NaN	7.7	8.3	7.6	NaN	7	5.1	5.8	NaN	8.4	NaN	6.8	6.7	7.2	7.8	8.2	7.7	5.8	7.2	5	8.4	NaN	5.6	NaN	6.7	5.5	5.8	5.8	6.9
6.6	NaN	5.1	5.1	5	6	6.4	6.6	NaN	NaN	6.6	5.3	NaN	NaN	5.9	5.9	6.1	NaN	5.5	NaN	5.7	5.9	5.1	5.3	NaN	NaN	NaN	5.1	5.8	NaN	5.8	6.5	5.9	5.2	5.7	5.2	5.1	5.2	5.2	5.9	5.6	6.3	NaN	5.1	5.4	6	5.5	5.8	5.4	5.8
7.3	NaN	5.1	5.1	5	NaN	7.4	5.9	NaN	NaN	5.9	5.3	NaN	NaN	6.4	7.2	7.3	NaN	7.2	NaN	6.1	6.2	6.5	7.2	NaN	NaN	NaN	5.5	6.4	NaN	7.4	7.8	6.4	5.3	5.7	5.4	5.4	5.2	6.3	5.9	5	7.6	NaN	6.6	5.4	6.4	5.5	5.8	5.4	7
8	NaN	5.1	5.1	5	6	6.6	7.2	NaN	NaN	6.9	5.3	NaN	NaN	6	6.2	6.3	NaN	5.4	NaN	6	5.9	5.4	5.1	NaN	NaN	NaN	5.1	5.8	NaN	5.8	6.4	6.5	5.4	5.2	5.3	5.3	5.2	5.9	5.9	5	5.3	NaN	5.1	5.4	6.6	5.5	5.8	5.4	6.3
6.2	5.4	5.1	5.1	5	5.4	NaN	5.8	NaN	NaN	5.4	5.2	5.6	5.5	5.8	5.9	6.3	NaN	7.5	NaN	6.9	9.3	6.7	6.9	5.2	8.4	6.1	5.4	5.8	NaN	5.9	NaN	5.8	5.8	7.2	6.9	7.4	7.5	6.4	6.3	5	7.7	8.1	6.3	NaN	5.7	5.5	5.8	5.4	6.4
5.4	5.6	NaN	NaN	NaN	5.8	NaN	NaN	NaN	NaN	5.2	NaN	5.6	6.4	NaN	5.9	NaN	NaN	NaN	NaN	NaN	9.5	7.6	8	7	7.8	8.3	NaN	NaN	NaN	7.4	8.6	6.3	6.6	NaN	NaN	NaN	NaN	NaN	7.2	NaN	7.4	7.6	NaN	NaN	NaN	NaN	NaN	NaN	NaN
6.2	NaN	6.2	5.8	6.3	5.9	NaN	5.8	NaN	NaN	5.9	5.7	NaN	NaN	6.5	7.4	7.1	NaN	6.8	NaN	7.2	8	7.9	7.3	8.2	NaN	7.5	5.9	5.8	NaN	7.4	8.2	5.6	6	6.1	6.5	6.4	6.6	5.2	7.4	5.5	8.1	NaN	6.8	NaN	5.7	5.5	5.8	5.4	5.8
6.2	5.4	5.7	5.3	5	5.4	NaN	6.4	NaN	NaN	5.4	6	5.6	5.5	5.5	5.5	5.8	NaN	5.5	NaN	7.4	8.7	5.8	5.4	5.2	5.5	5.4	6	6.5	NaN	5.5	6.8	5.8	5.3	5.9	5.6	5.9	5.7	6.6	5.6	5	6.2	6.3	5.9	NaN	6.1	5.5	5.8	5.4	6.4
6.2	NaN	5.1	5.1	5.2	5.9	6.6	5.8	NaN	NaN	5.9	5.3	NaN	NaN	5.3	5.3	5.2	NaN	5.7	NaN	5.7	5.9	5.8	5.6	NaN	NaN	NaN	5.8	5.9	NaN	5.9	7.2	5.6	5.2	5.2	5.2	5.1	5.2	5.2	5.9	5	6.2	NaN	5.1	5.4	5.7	5.5	5.8	5.4	5.8
NaN	5.4	NaN	NaN	NaN	5.7	NaN	NaN	NaN	NaN	5.2	NaN	5.6	5.8	NaN	NaN	NaN	NaN	NaN	NaN	NaN	NaN	NaN	7	5.4	7.5	5.8	NaN	NaN	NaN	6.2	7.5	5.6	5.4	NaN	NaN	NaN	NaN	NaN	5.3	NaN	5.9	6.4	NaN	NaN	NaN	NaN	NaN	NaN	NaN
NaN	5.4	NaN	NaN	NaN	5.4	NaN	NaN	NaN	NaN	5.2	NaN	5.6	5.7	NaN	NaN	NaN	NaN	NaN	NaN	NaN	8	NaN	8.2	7.6	8.9	7.9	NaN	NaN	NaN	7.8	9.2	5.6	5.4	NaN	NaN	NaN	NaN	NaN	6.6	NaN	8.3	8.7	NaN	NaN	NaN	NaN	NaN	NaN	NaN
6.2	NaN	5.1	5.1	5	NaN	6.7	6.3	NaN	NaN	NaN	5.2	NaN	NaN	5.8	7.1	6.7	NaN	6.4	NaN	5.1	6.6	6.6	6.7	NaN	NaN	NaN	5.2	5.7	5.6	7.3	8.1	5.6	5.2	5.1	5.2	5.1	NaN	5.2	5.9	5	6.7	NaN	NaN	5.4	5.7	5.1	5.8	5.4	NaN
6.2	NaN	5.1	5.1	5	5.9	6.1	6.9	NaN	NaN	5.9	5.3	NaN	NaN	5.8	5.9	6.2	NaN	5.2	NaN	5	5.9	5.1	5.1	NaN	NaN	NaN	5.1	5.8	NaN	6	6.7	5.6	5.2	5.4	6	5.2	5.2	5.5	5.9	5	6.3	NaN	5.4	5.4	5.7	5.5	5.8	6.1	5.8
NaN	NaN	5.1	5.1	5	5.9	6.4	6	NaN	NaN	5.9	5.3	NaN	NaN	5.8	5.9	6.1	NaN	5.3	NaN	5.1	5.9	5.1	5.1	NaN	NaN	NaN	5.1	5.8	NaN	5.9	6.7	5.7	5.2	5.2	6.2	5.1	5.2	5.7	5.9	5	6.1	NaN	5.6	5.4	6	5.5	5.8	5.4	5.8
6.2	NaN	5.1	5.1	5	5.9	6.6	6	NaN	NaN	5.9	5.2	NaN	NaN	6	6.8	6.6	NaN	6	NaN	5.1	6.4	6.2	6.4	NaN	NaN	NaN	5.1	5.4	6.1	6.7	7.7	5.7	5.2	5.4	5.2	5.1	5.2	5.2	5.9	5	6.7	NaN	5.1	5.4	5.7	5.3	5.8	5.4	5.8
NaN	NaN	5.1	5.1	5	NaN	6.2	NaN	NaN	NaN	NaN	5.4	NaN	NaN	5.5	5.7	5.8	NaN	5.1	NaN	5	NaN	5.1	5	NaN	NaN	NaN	5.1	5.8	NaN	5.3	6.5	5.6	5.2	5.1	5.2	5.1	5.2	5.2	NaN	5	5.3	NaN	5.1	5.4	5.7	5.5	NaN	5.4	5.8
6.2	NaN	5.1	5.1	5	NaN	NaN	6.2	NaN	NaN	NaN	5.1	NaN	NaN	NaN	NaN	NaN	NaN	6.5	NaN	5.3	7.9	6.6	6.5	NaN	NaN	NaN	5.4	5.4	5.4	NaN	NaN	5.6	NaN	5.1	NaN	NaN	NaN	5.2	5.9	NaN	6.4	NaN	NaN	NaN	5.8	5.1	5.8	5.4	NaN
6.2	NaN	5.1	5.1	5	5.9	5.7	5.8	NaN	NaN	5.9	5.3	NaN	NaN	6.4	6.5	6.5	NaN	6.4	4	5	5.9	6.6	6.6	5.8	NaN	NaN	5.1	5.8	NaN	6.4	7.1	5.6	5.2	5.1	5.2	5.1	5.2	6.1	5.9	5	6.8	NaN	5.1	NaN	5.7	5.5	5.8	NaN	6.9
6.2	5.4	5.3	5.1	5.2	5.6	NaN	6.1	NaN	NaN	5.6	5.8	5.6	5.5	5.6	5.8	6.1	5.6	6	NaN	7.7	9	6.6	5.8	5.2	6.3	6.6	6	6.4	NaN	6.1	7.7	6.7	5.6	6.7	5.5	5.3	5.3	7	6.5	5	7.3	6.5	5.8	NaN	6.2	5.5	6	5.4	6.3
NaN	NaN	NaN	NaN	NaN	NaN	NaN	NaN	NaN	NaN	NaN	NaN	NaN	NaN	NaN	6.6	NaN	NaN	NaN	NaN	NaN	9	6.8	6.9	7.6	7.6	7.8	NaN	NaN	NaN	7.8	NaN	NaN	6.7	NaN	NaN	NaN	NaN	NaN	7.9	NaN	7.4	NaN	NaN	NaN	NaN	NaN	NaN	NaN	NaN
NaN	NaN	NaN	NaN	NaN	NaN	NaN	NaN	NaN	NaN	NaN	NaN	NaN	NaN	NaN	6.3	NaN	NaN	NaN	NaN	NaN	8.2	6.3	6.5	6.8	7.6	7	NaN	NaN	NaN	7.5	8.3	NaN	5.8	NaN	NaN	NaN	NaN	NaN	7.8	NaN	7.2	NaN	NaN	NaN	NaN	NaN	NaN	NaN	NaN
NaN	NaN	NaN	NaN	NaN	NaN	NaN	NaN	NaN	NaN	NaN	NaN	NaN	NaN	NaN	6.1	NaN	NaN	NaN	NaN	NaN	9	6.7	6.5	7.2	NaN	7.5	NaN	NaN	NaN	7.5	8.3	NaN	5.4	NaN	NaN	NaN	NaN	NaN	7.2	NaN	7.2	NaN	NaN	NaN	NaN	NaN	NaN	NaN	NaN
NaN	NaN	NaN	NaN	NaN	NaN	NaN	NaN	NaN	NaN	NaN	NaN	NaN	NaN	NaN	6.4	NaN	NaN	NaN	NaN	NaN	9.5	7.2	7.2	6.6	NaN	7.6	NaN	NaN	NaN	7.8	NaN	NaN	6.4	NaN	NaN	NaN	NaN	NaN	6.7	NaN	7.9	NaN	NaN	NaN	NaN	NaN	NaN	NaN	NaN
NaN	NaN	NaN	NaN	NaN	NaN	NaN	NaN	NaN	NaN	NaN	NaN	NaN	NaN	NaN	6	NaN	NaN	NaN	NaN	NaN	8.6	6.4	7.5	7	7.7	7.1	NaN	NaN	NaN	7.7	8.3	NaN	6.4	NaN	NaN	NaN	NaN	NaN	7.1	NaN	7.8	NaN	NaN	NaN	NaN	NaN	NaN	NaN	NaN
NaN	NaN	NaN	NaN	NaN	NaN	NaN	NaN	NaN	NaN	NaN	NaN	NaN	NaN	NaN	6.1	NaN	NaN	NaN	NaN	NaN	9	6.6	7.2	6.9	8.8	7.2	NaN	NaN	NaN	7.4	8.4	NaN	5.9	NaN	NaN	NaN	NaN	NaN	7.3	NaN	8	NaN	NaN	NaN	NaN	NaN	NaN	NaN	NaN
NaN	NaN	NaN	NaN	NaN	NaN	NaN	NaN	NaN	NaN	NaN	NaN	NaN	NaN	NaN	5.7	NaN	NaN	NaN	NaN	NaN	8.5	5.9	6.6	7.2	8.7	6.7	NaN	NaN	NaN	7	7.9	NaN	5.9	NaN	NaN	NaN	NaN	NaN	7.1	NaN	7	NaN	NaN	NaN	NaN	NaN	NaN	NaN	NaN
NaN	NaN	NaN	NaN	NaN	NaN	NaN	NaN	NaN	NaN	NaN	NaN	NaN	NaN	NaN	6.2	NaN	NaN	NaN	NaN	NaN	9.2	6.9	7	7.1	NaN	7.3	NaN	NaN	NaN	7.8	8.5	NaN	5.5	NaN	NaN	NaN	NaN	NaN	6.6	NaN	7.3	NaN	NaN	NaN	NaN	NaN	NaN	NaN	NaN
NaN	NaN	NaN	NaN	NaN	NaN	NaN	NaN	NaN	NaN	NaN	NaN	NaN	NaN	NaN	6.4	NaN	NaN	NaN	NaN	NaN	9.6	7	7.5	6.7	NaN	8.6	NaN	NaN	NaN	7.5	8.7	NaN	5.8	NaN	NaN	NaN	NaN	NaN	6.7	NaN	7.6	NaN	NaN	NaN	NaN	NaN	NaN	NaN	NaN
NaN	NaN	NaN	NaN	NaN	NaN	NaN	NaN	NaN	NaN	NaN	NaN	NaN	NaN	NaN	6.5	NaN	NaN	NaN	NaN	NaN	9	7.4	8.9	6.8	NaN	8.3	NaN	NaN	NaN	7.3	8.2	NaN	6	NaN	NaN	NaN	NaN	NaN	7.6	NaN	7.4	NaN	NaN	NaN	NaN	NaN	NaN	NaN	NaN
NaN	NaN	NaN	NaN	NaN	NaN	NaN	NaN	NaN	NaN	NaN	NaN	NaN	NaN	NaN	6.9	NaN	NaN	NaN	NaN	NaN	9.8	7.8	8.2	7	NaN	8.5	NaN	NaN	NaN	7.8	NaN	NaN	6.2	NaN	NaN	NaN	NaN	NaN	6.8	NaN	8.6	NaN	NaN	NaN	NaN	NaN	NaN	NaN	NaN
NaN	NaN	NaN	NaN	NaN	NaN	NaN	NaN	NaN	NaN	NaN	NaN	NaN	NaN	NaN	6	NaN	NaN	NaN	NaN	NaN	9	6.6	7.2	7.5	8.4	7.8	NaN	NaN	NaN	7.4	NaN	NaN	6.8	NaN	NaN	NaN	NaN	NaN	6.5	NaN	7.5	NaN	NaN	NaN	NaN	NaN	NaN	NaN	NaN
NaN	NaN	NaN	NaN	NaN	NaN	NaN	NaN	NaN	NaN	NaN	NaN	NaN	NaN	NaN	6.4	NaN	NaN	NaN	NaN	NaN	8.7	6.5	6.8	6.4	7.3	7	NaN	NaN	NaN	7.6	NaN	NaN	6.3	NaN	NaN	NaN	NaN	NaN	7.6	NaN	8.2	NaN	NaN	NaN	NaN	NaN	NaN	NaN	NaN
NaN	NaN	NaN	NaN	NaN	NaN	NaN	NaN	NaN	NaN	NaN	NaN	NaN	NaN	NaN	6.2	NaN	NaN	NaN	NaN	NaN	9.1	6.3	6.7	6.6	8.5	6.9	NaN	NaN	NaN	7.3	NaN	NaN	5.7	NaN	NaN	NaN	NaN	NaN	6.9	NaN	7.6	NaN	NaN	NaN	NaN	NaN	NaN	NaN	NaN
NaN	NaN	NaN	NaN	NaN	NaN	NaN	NaN	NaN	NaN	NaN	NaN	NaN	NaN	NaN	6.4	NaN	NaN	NaN	NaN	NaN	9.5	7.7	8.2	7.4	8.8	8.5	NaN	NaN	NaN	8.5	8.9	NaN	7.4	NaN	NaN	NaN	NaN	NaN	7.5	NaN	8.5	NaN	NaN	NaN	NaN	NaN	NaN	NaN	NaN
NaN	NaN	NaN	NaN	NaN	NaN	NaN	NaN	NaN	NaN	NaN	NaN	NaN	NaN	NaN	6.8	NaN	NaN	NaN	NaN	NaN	9.7	8	8.2	6.3	NaN	8.4	NaN	NaN	NaN	7.8	NaN	NaN	6.4	NaN	NaN	NaN	NaN	NaN	6.9	NaN	9	NaN	NaN	NaN	NaN	NaN	NaN	NaN	NaN
NaN	NaN	NaN	NaN	NaN	NaN	NaN	NaN	NaN	NaN	NaN	NaN	NaN	NaN	NaN	6.5	NaN	NaN	NaN	NaN	NaN	9	8.1	NaN	6.8	NaN	8.1	NaN	NaN	NaN	7.8	NaN	NaN	6	NaN	NaN	NaN	NaN	NaN	5.7	NaN	7.9	NaN	NaN	NaN	NaN	NaN	NaN	NaN	NaN
NaN	NaN	NaN	NaN	NaN	NaN	NaN	NaN	NaN	NaN	NaN	NaN	NaN	NaN	NaN	5.6	NaN	NaN	NaN	NaN	NaN	8.8	7.4	8.7	8.2	NaN	8.4	NaN	NaN	NaN	8.4	8.8	NaN	5.9	NaN	NaN	NaN	NaN	NaN	7.4	NaN	9.1	NaN	NaN	NaN	NaN	NaN	NaN	NaN	NaN
NaN	NaN	NaN	NaN	NaN	NaN	NaN	NaN	NaN	NaN	NaN	NaN	NaN	NaN	NaN	6.2	NaN	NaN	NaN	NaN	NaN	9.5	7.4	7.9	7.4	8.8	8.3	NaN	NaN	NaN	8	8.7	NaN	7.1	NaN	NaN	NaN	NaN	NaN	6.6	NaN	8	NaN	NaN	NaN	NaN	NaN	NaN	NaN	NaN
NaN	NaN	NaN	NaN	NaN	5.3	NaN	NaN	NaN	NaN	NaN	NaN	NaN	NaN	NaN	NaN	NaN	NaN	NaN	NaN	NaN	8.1	7.5	NaN	NaN	NaN	NaN	NaN	NaN	NaN	NaN	NaN	NaN	NaN	NaN	NaN	NaN	NaN	NaN	NaN	NaN	NaN	NaN	NaN	NaN	NaN	NaN	NaN	NaN	NaN
NaN	NaN	NaN	NaN	NaN	NaN	NaN	NaN	NaN	NaN	NaN	NaN	NaN	NaN	NaN	NaN	NaN	NaN	NaN	NaN	NaN	8.9	8.3	NaN	NaN	NaN	NaN	NaN	NaN	NaN	NaN	NaN	NaN	NaN	NaN	NaN	NaN	NaN	NaN	NaN	NaN	NaN	NaN	NaN	NaN	NaN	NaN	NaN	NaN	NaN
NaN	NaN	NaN	NaN	NaN	NaN	NaN	NaN	NaN	NaN	NaN	NaN	NaN	NaN	NaN	5.5	NaN	NaN	NaN	NaN	NaN	8.3	6.9	7.9	7.1	7.9	7.1	NaN	NaN	NaN	6.4	7.5	NaN	5.4	NaN	NaN	NaN	NaN	NaN	7.1	NaN	7.7	NaN	NaN	NaN	NaN	NaN	NaN	NaN	NaN
NaN	NaN	NaN	NaN	NaN	NaN	NaN	NaN	NaN	NaN	NaN	NaN	NaN	NaN	NaN	5.5	NaN	NaN	NaN	NaN	NaN	6.7	5.5	6	5.7	7.3	6	NaN	NaN	NaN	6.2	7.2	NaN	5.4	NaN	NaN	NaN	NaN	NaN	5.9	NaN	7.3	NaN	NaN	NaN	NaN	NaN	NaN	NaN	NaN
NaN	NaN	NaN	NaN	NaN	NaN	NaN	NaN	NaN	NaN	NaN	NaN	NaN	NaN	NaN	NaN	NaN	NaN	NaN	NaN	NaN	7.9	6.3	NaN	NaN	NaN	NaN	NaN	NaN	NaN	NaN	8	NaN	NaN	NaN	NaN	NaN	NaN	NaN	NaN	NaN	NaN	NaN	NaN	NaN	NaN	NaN	NaN	NaN	NaN
NaN	NaN	NaN	NaN	NaN	NaN	NaN	NaN	NaN	NaN	NaN	NaN	NaN	NaN	NaN	NaN	NaN	NaN	NaN	NaN	NaN	7.2	5.9	NaN	NaN	NaN	NaN	NaN	NaN	NaN	NaN	7.4	NaN	NaN	NaN	NaN	NaN	NaN	NaN	NaN	NaN	NaN	NaN	NaN	NaN	NaN	NaN	NaN	NaN	NaN
NaN	NaN	NaN	NaN	NaN	NaN	NaN	NaN	NaN	NaN	NaN	NaN	NaN	NaN	NaN	NaN	NaN	NaN	NaN	NaN	NaN	9.1	7	NaN	NaN	NaN	NaN	NaN	NaN	NaN	NaN	8.4	NaN	NaN	NaN	NaN	NaN	NaN	NaN	NaN	NaN	NaN	NaN	NaN	NaN	NaN	NaN	NaN	NaN	NaN
NaN	NaN	NaN	NaN	NaN	NaN	NaN	NaN	NaN	NaN	NaN	NaN	NaN	NaN	NaN	NaN	NaN	NaN	NaN	NaN	NaN	7.7	NaN	NaN	NaN	NaN	NaN	NaN	NaN	NaN	NaN	8.5	NaN	NaN	NaN	NaN	NaN	NaN	NaN	NaN	NaN	NaN	NaN	NaN	NaN	NaN	NaN	NaN	NaN	NaN
NaN	NaN	NaN	NaN	NaN	NaN	NaN	NaN	NaN	NaN	NaN	NaN	NaN	NaN	NaN	NaN	NaN	NaN	NaN	NaN	NaN	8.2	6.7	NaN	NaN	NaN	NaN	NaN	NaN	NaN	NaN	7.7	NaN	NaN	NaN	NaN	NaN	NaN	NaN	NaN	NaN	NaN	NaN	NaN	NaN	NaN	NaN	NaN	NaN	NaN
NaN	NaN	NaN	NaN	NaN	NaN	NaN	NaN	NaN	NaN	NaN	NaN	NaN	NaN	NaN	NaN	NaN	NaN	NaN	NaN	NaN	8.6	7.4	NaN	NaN	NaN	NaN	NaN	NaN	NaN	NaN	8.2	NaN	NaN	NaN	NaN	NaN	NaN	NaN	NaN	NaN	NaN	NaN	NaN	NaN	NaN	NaN	NaN	NaN	NaN
NaN	NaN	NaN	NaN	NaN	NaN	NaN	NaN	NaN	NaN	NaN	NaN	NaN	NaN	NaN	NaN	NaN	NaN	NaN	NaN	NaN	8	5.7	NaN	NaN	NaN	NaN	NaN	NaN	NaN	NaN	8	NaN	NaN	NaN	NaN	NaN	NaN	NaN	NaN	NaN	NaN	NaN	NaN	NaN	NaN	NaN	NaN	NaN	NaN
NaN	NaN	NaN	NaN	NaN	NaN	NaN	NaN	NaN	NaN	NaN	NaN	NaN	NaN	NaN	NaN	NaN	NaN	NaN	NaN	NaN	8.7	6.6	NaN	NaN	NaN	NaN	NaN	NaN	NaN	NaN	8.3	NaN	NaN	NaN	NaN	NaN	NaN	NaN	NaN	NaN	NaN	NaN	NaN	NaN	NaN	NaN	NaN	NaN	NaN
NaN	NaN	NaN	NaN	NaN	NaN	NaN	NaN	NaN	NaN	NaN	NaN	NaN	NaN	NaN	NaN	NaN	NaN	NaN	NaN	NaN	8.7	6.8	NaN	NaN	NaN	NaN	NaN	NaN	NaN	NaN	8.2	NaN	NaN	NaN	NaN	NaN	NaN	NaN	NaN	NaN	NaN	NaN	NaN	NaN	NaN	NaN	NaN	NaN	NaN
NaN	NaN	NaN	NaN	NaN	NaN	NaN	NaN	NaN	NaN	NaN	NaN	NaN	NaN	NaN	NaN	NaN	NaN	NaN	NaN	NaN	8.9	6.7	NaN	NaN	NaN	NaN	NaN	NaN	NaN	NaN	8.3	NaN	NaN	NaN	NaN	NaN	NaN	NaN	NaN	NaN	NaN	NaN	NaN	NaN	NaN	NaN	NaN	NaN	NaN
NaN	5.4	NaN	NaN	NaN	5.2	NaN	NaN	NaN	NaN	5.2	NaN	5.6	5.1	NaN	5.5	NaN	NaN	NaN	NaN	NaN	9.1	5.9	6.9	6.4	8.1	6.7	NaN	NaN	NaN	6.7	8.1	5.6	5.6	NaN	NaN	NaN	NaN	NaN	6.5	NaN	7.6	7.8	NaN	NaN	NaN	NaN	NaN	NaN	NaN
NaN	5.4	NaN	NaN	NaN	5.2	NaN	NaN	NaN	NaN	5.2	NaN	5.6	5.1	NaN	5.5	NaN	NaN	NaN	NaN	NaN	8.6	5.5	5.4	5.4	7.2	5.8	NaN	NaN	NaN	5.6	8	5.6	5.4	NaN	NaN	NaN	NaN	NaN	5.5	NaN	6.6	7.3	NaN	NaN	NaN	NaN	NaN	NaN	NaN
NaN	NaN	NaN	NaN	NaN	NaN	NaN	NaN	NaN	NaN	NaN	NaN	NaN	NaN	NaN	5.5	NaN	NaN	NaN	NaN	NaN	8.7	5.7	6.2	7.2	NaN	6.9	NaN	NaN	NaN	6.8	8.2	NaN	6	NaN	NaN	NaN	NaN	NaN	6.6	NaN	7.3	NaN	NaN	NaN	NaN	NaN	NaN	NaN	NaN
NaN	NaN	NaN	NaN	NaN	NaN	NaN	NaN	NaN	NaN	NaN	NaN	NaN	NaN	NaN	5.5	NaN	NaN	NaN	NaN	NaN	9	6.2	5.5	5.4	6.1	6.2	NaN	NaN	NaN	6.1	7.4	NaN	5.4	NaN	NaN	NaN	NaN	NaN	7.1	NaN	8.3	NaN	NaN	NaN	NaN	NaN	NaN	NaN	NaN
NaN	NaN	NaN	NaN	NaN	NaN	NaN	NaN	NaN	NaN	NaN	NaN	NaN	NaN	NaN	NaN	NaN	NaN	NaN	NaN	NaN	8.6	6.5	NaN	NaN	NaN	NaN	NaN	NaN	NaN	NaN	NaN	NaN	NaN	NaN	NaN	NaN	NaN	NaN	NaN	NaN	NaN	NaN	NaN	NaN	NaN	NaN	NaN	NaN	NaN
NaN	NaN	NaN	NaN	NaN	NaN	NaN	NaN	NaN	NaN	NaN	NaN	NaN	NaN	NaN	NaN	NaN	NaN	NaN	NaN	NaN	9.1	6.9	NaN	NaN	NaN	NaN	NaN	NaN	NaN	NaN	NaN	NaN	NaN	NaN	NaN	NaN	NaN	NaN	NaN	NaN	NaN	NaN	NaN	NaN	NaN	NaN	NaN	NaN	NaN
NaN	NaN	NaN	NaN	NaN	NaN	NaN	NaN	NaN	NaN	NaN	NaN	NaN	NaN	NaN	5.5	NaN	NaN	NaN	NaN	NaN	8.9	6.4	6.4	5.4	5.5	7.2	NaN	NaN	NaN	6.6	7.6	NaN	6.3	NaN	NaN	NaN	NaN	NaN	6.8	NaN	7.2	NaN	NaN	NaN	NaN	NaN	NaN	NaN	NaN
NaN	NaN	NaN	NaN	NaN	NaN	NaN	NaN	NaN	NaN	NaN	NaN	NaN	NaN	NaN	NaN	NaN	NaN	NaN	NaN	NaN	8.7	6.6	NaN	6.8	NaN	6.7	NaN	NaN	NaN	NaN	NaN	NaN	NaN	NaN	NaN	NaN	NaN	NaN	NaN	NaN	NaN	NaN	NaN	NaN	NaN	NaN	NaN	NaN	NaN
NaN	NaN	NaN	NaN	NaN	NaN	NaN	NaN	NaN	NaN	NaN	NaN	NaN	NaN	NaN	5.5	NaN	NaN	NaN	NaN	NaN	9.4	6.4	6.4	5.4	7	6.4	NaN	NaN	NaN	5.7	7.2	NaN	5.4	NaN	NaN	NaN	NaN	NaN	7.4	NaN	7.3	NaN	NaN	NaN	NaN	NaN	NaN	NaN	NaN
NaN	NaN	NaN	NaN	NaN	NaN	NaN	NaN	NaN	NaN	NaN	NaN	NaN	NaN	NaN	NaN	NaN	NaN	NaN	NaN	NaN	9.2	7	NaN	7.1	NaN	6.8	NaN	NaN	NaN	NaN	NaN	NaN	NaN	NaN	NaN	NaN	NaN	NaN	NaN	NaN	NaN	NaN	NaN	NaN	NaN	NaN	NaN	NaN	NaN
NaN	5.4	NaN	NaN	NaN	5.2	NaN	NaN	NaN	NaN	5.2	NaN	5.6	5.1	NaN	5.5	NaN	NaN	NaN	NaN	NaN	9.3	5.5	6	5.4	7.8	5.8	NaN	NaN	NaN	5.8	7.9	5.6	6.1	NaN	NaN	NaN	NaN	NaN	5.5	NaN	7.4	7.4	NaN	NaN	NaN	NaN	NaN	NaN	NaN
NaN	5.4	NaN	NaN	NaN	5.2	NaN	NaN	NaN	NaN	5.2	NaN	5.6	5.1	NaN	5.5	NaN	NaN	NaN	NaN	NaN	8.8	5.5	5.4	5.4	7.1	5.8	NaN	NaN	NaN	5.5	7.6	5.6	5.6	NaN	NaN	NaN	NaN	NaN	5.4	NaN	6.6	6.5	NaN	NaN	NaN	NaN	NaN	NaN	NaN
NaN	NaN	NaN	NaN	NaN	NaN	NaN	NaN	NaN	NaN	NaN	NaN	NaN	NaN	NaN	NaN	NaN	NaN	NaN	NaN	NaN	NaN	NaN	NaN	NaN	NaN	NaN	NaN	NaN	NaN	NaN	NaN	NaN	4.3	NaN	NaN	NaN	NaN	NaN	NaN	NaN	NaN	4.2	NaN	NaN	NaN	NaN	NaN	NaN	NaN
NaN	NaN	NaN	NaN	NaN	5.5	NaN	NaN	NaN	NaN	NaN	NaN	NaN	NaN	NaN	NaN	NaN	NaN	NaN	NaN	NaN	6.5	NaN	NaN	NaN	NaN	NaN	NaN	NaN	NaN	NaN	NaN	NaN	NaN	NaN	NaN	NaN	NaN	NaN	NaN	NaN	NaN	NaN	NaN	NaN	NaN	NaN	NaN	NaN	NaN
NaN	NaN	NaN	NaN	NaN	NaN	NaN	NaN	NaN	NaN	NaN	NaN	NaN	NaN	NaN	NaN	NaN	NaN	NaN	NaN	NaN	7	NaN	NaN	5.6	NaN	5.6	NaN	NaN	NaN	NaN	NaN	NaN	NaN	NaN	NaN	NaN	NaN	NaN	NaN	NaN	NaN	NaN	NaN	NaN	NaN	NaN	NaN	NaN	NaN
NaN	NaN	NaN	NaN	NaN	NaN	NaN	NaN	NaN	NaN	NaN	NaN	NaN	NaN	NaN	NaN	NaN	NaN	NaN	NaN	NaN	7	NaN	NaN	NaN	NaN	NaN	NaN	NaN	NaN	NaN	NaN	NaN	NaN	NaN	NaN	NaN	NaN	NaN	NaN	NaN	NaN	NaN	NaN	NaN	NaN	NaN	NaN	NaN	NaN
6.7	5.4	NaN	NaN	NaN	5.2	NaN	NaN	NaN	NaN	6.5	NaN	5.6	5.4	NaN	NaN	NaN	NaN	NaN	NaN	NaN	NaN	NaN	5.5	5.4	7.6	5.8	5.5	NaN	NaN	5.4	5.6	7.2	5.4	NaN	NaN	NaN	NaN	NaN	5.3	NaN	5.7	5.6	NaN	NaN	NaN	NaN	NaN	NaN	NaN
8.7	5.4	NaN	NaN	NaN	5.6	NaN	NaN	NaN	NaN	7	NaN	5.6	5.4	NaN	NaN	NaN	NaN	NaN	NaN	NaN	NaN	NaN	5.5	5.4	7.2	5.8	5.5	NaN	NaN	5.4	5.6	8.4	5.4	NaN	NaN	NaN	NaN	NaN	5.3	NaN	5.7	5.6	NaN	NaN	NaN	NaN	NaN	NaN	NaN
8.1	7.3	NaN	NaN	NaN	6.3	NaN	6.9	5.7	NaN	6.2	NaN	5.6	5.1	NaN	NaN	NaN	NaN	NaN	NaN	NaN	6.1	5.5	5.5	6.4	7.1	5.8	NaN	NaN	NaN	5.5	6.4	8.6	5.4	NaN	NaN	NaN	NaN	NaN	5.4	NaN	5.7	5.6	NaN	NaN	NaN	NaN	NaN	NaN	5.5
6.4	5.4	NaN	NaN	NaN	6.1	NaN	NaN	NaN	NaN	5.7	NaN	5.6	5.4	NaN	NaN	NaN	NaN	NaN	NaN	NaN	NaN	NaN	5.5	5.4	8.1	5.8	5.5	NaN	NaN	5.4	5.6	8.3	5.4	NaN	NaN	NaN	NaN	NaN	5.3	NaN	5.7	5.6	NaN	NaN	NaN	NaN	NaN	NaN	NaN
7.6	NaN	5.1	5.1	5	6.8	8.6	7.7	NaN	NaN	6.8	5.3	NaN	NaN	5.1	5.2	5.2	NaN	5.1	NaN	5	5.9	5.1	5	NaN	NaN	NaN	5.1	5.8	NaN	5.1	5	7	5.2	5.1	5.2	5.1	5.2	5.2	5.9	5	5.2	NaN	5.1	5.4	5.7	6.1	5.8	5.4	6.1
6.6	NaN	5.1	5.1	5	5.9	6.4	6.9	NaN	NaN	5.9	5.6	NaN	NaN	5.2	5.4	5.3	NaN	5.1	NaN	5	5.9	5.1	5	NaN	NaN	NaN	5.1	5.8	NaN	5.4	6.4	6.7	6.1	5.8	7.7	6.1	6	5.2	5.9	5	5.7	NaN	5.1	NaN	5.7	5.5	5.8	5.4	6.4
7.4	NaN	5.1	5.1	5	5.9	7	7	NaN	NaN	5.9	5.1	NaN	NaN	5.1	5.2	5.2	NaN	5.1	NaN	5	5.9	5.1	5	NaN	NaN	NaN	5.1	5.8	NaN	5.2	5	8	5.2	5.1	5.8	6	5.2	5.2	5.9	5	5.2	NaN	5.1	NaN	5.7	5.5	5.8	5.4	6.5
8.6	NaN	5.1	5.1	5	6.3	8.2	8.7	NaN	NaN	5.9	5.3	NaN	NaN	5.1	5.2	5.2	NaN	5.1	NaN	5	5.9	5.1	5	NaN	NaN	NaN	5.1	5.8	NaN	5.1	5	8.1	5.2	5.1	5.2	5.1	5.2	5.2	5.9	5	5.2	NaN	5.1	5.4	5.7	5.7	5.8	5.4	6.5
8.6	NaN	5.1	5.1	5	6.6	8.7	8.5	NaN	NaN	7.9	5.3	NaN	NaN	5.1	5.3	5.2	NaN	5.1	NaN	5	5.9	5.1	5.1	NaN	NaN	NaN	5.1	5.9	NaN	5.1	5	7.9	5.2	5.1	5.2	5.1	5.2	5.2	5.9	5	5.2	NaN	5.4	5.4	5.9	7	5.8	5.5	7.2
8.4	NaN	5.1	5.1	5	6.7	8.7	8.8	NaN	NaN	5.9	5.3	NaN	NaN	5.1	5.2	5.2	NaN	5.1	NaN	5	5.9	5.1	5	NaN	NaN	NaN	5.1	5.8	NaN	5.1	5	8	5.2	5.1	5.2	5.1	5.2	5.2	5.9	5	5.2	NaN	5.1	5.4	5.7	5.8	5.8	5.4	5.8
6.5	NaN	5.2	5.4	5	NaN	7.7	7.3	NaN	NaN	5.9	5.5	NaN	NaN	5.1	6.1	6.3	NaN	6.5	NaN	5	5.9	5.1	5.3	NaN	NaN	NaN	5.1	6.2	NaN	5.8	6.2	6.9	5.2	5.4	5.8	5.3	5.6	5.2	5.9	5	5.5	NaN	5.1	5.4	5.7	6.5	5.8	5.4	6.1
6.3	NaN	NaN	NaN	NaN	NaN	NaN	5.8	NaN	NaN	NaN	NaN	NaN	NaN	NaN	NaN	NaN	NaN	NaN	NaN	NaN	NaN	NaN	NaN	NaN	NaN	NaN	NaN	NaN	NaN	NaN	NaN	8.9	NaN	NaN	NaN	NaN	NaN	NaN	NaN	NaN	NaN	NaN	NaN	NaN	NaN	NaN	NaN	NaN	NaN
9.3	NaN	5.1	5.1	5	NaN	NaN	8.5	NaN	NaN	NaN	5.1	NaN	NaN	NaN	NaN	NaN	NaN	5.1	NaN	5	NaN	5.1	5	NaN	NaN	NaN	5.1	5	5.4	NaN	NaN	8.8	NaN	5.9	NaN	NaN	NaN	5.2	6.1	NaN	5.2	NaN	NaN	NaN	5.9	8	6.9	5.4	NaN
8.7	NaN	5.1	5.1	5	NaN	NaN	8.3	NaN	NaN	NaN	5.3	NaN	NaN	5.1	5.2	5.2	NaN	5.1	6.3	5	5.9	5.1	5	NaN	NaN	NaN	5.1	5.4	5.4	5.7	5.9	8.5	5.3	5.5	6.2	5.4	NaN	5.2	5.9	5	5.2	NaN	NaN	5.6	5.8	7.7	5.9	5.4	NaN
8.8	NaN	5.1	5.4	5	NaN	NaN	8.8	NaN	NaN	NaN	5.2	NaN	NaN	5.1	5.2	5.2	NaN	5.1	NaN	5	5.9	5.1	5	NaN	NaN	NaN	5.1	5.8	5.4	5.6	5	8.8	5.2	5.1	5.8	5.3	NaN	5.2	5.9	5	5.2	NaN	NaN	5.4	6.1	7.7	5.8	5.4	NaN
8.7	6.7	5.1	5.1	5	5.7	NaN	8.5	NaN	NaN	NaN	5.1	NaN	NaN	NaN	NaN	NaN	NaN	5.1	NaN	5	NaN	5.1	5	NaN	5.8	NaN	5.1	6.3	5.4	5.4	5.6	8.7	5.4	5.9	NaN	NaN	NaN	5.2	5.9	NaN	5.7	5.6	NaN	NaN	6.5	6.6	5.9	6	6
8.9	NaN	5.1	5.1	5	NaN	7.7	7.9	NaN	NaN	7.6	5.3	NaN	NaN	5.1	5.2	5.2	NaN	5.1	NaN	5	5.9	5.1	5	NaN	NaN	NaN	5.1	5.8	NaN	5.1	5	8.5	5.2	5.1	5.2	5.1	5.2	5.2	5.9	5	5.2	NaN	5.1	5.4	NaN	7.1	NaN	6.2	7.6
6.9	NaN	5.1	5.1	5	NaN	NaN	7.4	NaN	NaN	NaN	6.1	NaN	NaN	NaN	NaN	NaN	NaN	NaN	NaN	5	NaN	5.2	5	NaN	NaN	NaN	5.1	5.4	5.4	NaN	NaN	7.4	NaN	6.9	NaN	NaN	NaN	5.2	6.2	NaN	6.3	NaN	NaN	NaN	5.7	6.9	5.8	6.2	NaN
9.2	NaN	5.1	5.1	5	NaN	7.8	8.3	NaN	NaN	7.1	5.3	NaN	NaN	5.1	5.2	5.2	NaN	5.1	NaN	5.1	5.9	5.1	5	NaN	NaN	NaN	5.1	5.8	NaN	5.1	5	8.6	5.2	5.1	5.2	5.1	5.2	5.2	6	5	5.2	NaN	5.1	5.4	NaN	6.1	NaN	5.4	7.7
9.6	NaN	5.1	5.1	5	NaN	8.5	8.9	NaN	NaN	6.6	5.3	NaN	NaN	5.1	5.2	5.2	NaN	5.1	4	5	5.9	5.1	5	NaN	NaN	NaN	5.1	5.8	NaN	5.1	5	NaN	5.2	5.1	5.2	5.1	5.2	5.2	5.9	5	5.2	NaN	5.1	5.4	NaN	5.5	NaN	5.4	8.2
8.6	NaN	5.1	5.1	5	6.2	NaN	7	NaN	NaN	5.9	6.7	NaN	NaN	5.5	5.9	6	NaN	5.1	NaN	5.1	5.9	5.3	5	NaN	NaN	NaN	5.1	6.3	NaN	5.5	5	7.8	5.3	5.1	5.9	5.4	5.2	5.2	5.9	5	5.2	NaN	5.1	5.4	5.7	7.7	5.8	5.9	6.1
9.1	NaN	5.1	5.1	5	NaN	7.7	7.9	NaN	NaN	7.7	5.8	NaN	NaN	5.1	5.3	5.2	NaN	5.1	NaN	5	5.9	5.1	5	NaN	NaN	NaN	5.1	5.8	NaN	5.7	5.2	8.5	5.2	5.4	5.9	5.5	5.2	5.2	5.9	5	5.2	NaN	5.1	5.4	NaN	7	NaN	6.3	7.7
8.1	7	NaN	NaN	NaN	5.6	NaN	7	5.7	NaN	6.2	NaN	5.6	5.1	NaN	NaN	NaN	NaN	NaN	NaN	NaN	6.1	5.5	5.5	5.7	6.3	5.8	NaN	NaN	NaN	5.4	6	8.6	5.4	NaN	NaN	NaN	NaN	NaN	5.3	NaN	5.7	5.6	NaN	NaN	NaN	NaN	NaN	NaN	5.5
6.2	NaN	5.3	5.3	5	6.8	8.5	6.1	NaN	NaN	5.9	5.2	NaN	NaN	5.1	5.2	5.2	NaN	5.1	5.5	5.2	5.9	5.4	5	NaN	NaN	NaN	5.2	5.3	5.4	5.2	6.5	7.7	5.2	5.1	5.5	5.2	5.2	5.2	5.9	5	5.3	NaN	5.4	5.4	5.7	6.8	5.8	5.4	5.8
6.2	NaN	5.1	5.4	5	5.9	6.5	6.9	NaN	NaN	5.9	5.3	NaN	NaN	5.1	6.1	5.6	NaN	6.2	NaN	5.4	5.9	5.1	5	NaN	NaN	NaN	5.1	NaN	NaN	5.2	5.3	5.6	5.2	5.1	5.5	5.3	5.2	5.2	5.9	5	5.2	NaN	5.1	NaN	5.7	5.5	5.8	5.4	5.8
6.2	NaN	5.1	5.1	5	7.3	7.3	5.9	NaN	NaN	5.9	5.2	NaN	NaN	5.1	5.2	5.2	NaN	5.1	6	5.1	5.9	5.2	5	NaN	NaN	NaN	5.1	5.4	5.8	5.4	5.2	7.8	5.2	5.1	5.6	5.5	5.2	5.2	5.9	5.3	5.2	NaN	5.1	5.4	5.7	5.9	5.8	5.4	5.8
NaN	NaN	5.1	5.1	5	7.8	8	7.9	NaN	NaN	7.2	5.3	NaN	NaN	5.1	5.2	5.2	NaN	5.1	NaN	5	5.9	5.1	5	NaN	NaN	NaN	5.1	5.8	NaN	5.2	5	7.3	5.2	5.1	5.2	5.1	5.2	5.2	5.9	5	5.2	NaN	5.1	5.4	NaN	6.9	NaN	6	6.6
NaN	NaN	5.1	5.1	5	6	7.8	7.6	NaN	NaN	7.4	5.8	NaN	NaN	5.1	5.3	5.2	NaN	5.1	NaN	5	5.9	5.1	5	NaN	NaN	NaN	5.1	6.3	NaN	5.7	5.2	8.3	5.4	5.8	6.2	6.1	5.3	5.2	5.9	5	5.2	NaN	5.1	5.4	NaN	6.7	NaN	6.3	7.2
NaN	NaN	NaN	NaN	NaN	6	NaN	7.5	NaN	NaN	NaN	NaN	NaN	NaN	NaN	NaN	NaN	NaN	NaN	NaN	NaN	NaN	5.5	NaN	NaN	NaN	NaN	NaN	NaN	NaN	5.4	NaN	NaN	5.4	NaN	NaN	NaN	NaN	NaN	5.5	NaN	NaN	NaN	NaN	NaN	NaN	NaN	NaN	NaN	6.1
NaN	NaN	NaN	NaN	NaN	7.6	NaN	NaN	NaN	NaN	NaN	NaN	NaN	NaN	NaN	NaN	NaN	NaN	NaN	NaN	NaN	NaN	NaN	NaN	NaN	NaN	NaN	NaN	NaN	NaN	NaN	NaN	NaN	NaN	NaN	NaN	NaN	NaN	NaN	NaN	NaN	NaN	NaN	NaN	NaN	NaN	NaN	NaN	NaN	NaN
6.2	NaN	5.1	5.1	5	NaN	6.6	7.2	NaN	NaN	5.9	5.2	NaN	NaN	5.1	5.2	5.2	NaN	5.1	NaN	5	5.9	5.1	5	NaN	NaN	NaN	5.1	5.8	NaN	6.4	7.3	5.6	5.2	5.4	5.7	5.5	5.3	5.2	5.9	5	7	NaN	5.2	5.4	6.3	5.5	5.8	5.8	5.8
6.2	NaN	5.1	5.1	5	NaN	6.5	6.3	NaN	NaN	5.9	5.2	NaN	NaN	5.1	5.2	5.2	NaN	5.9	NaN	5	5.9	5.1	5	NaN	NaN	NaN	5.1	5.8	NaN	5.1	5.4	5.6	5.2	5.1	5.6	5.4	5.2	5.2	5.9	5	5.2	NaN	5.1	5.4	5.7	5.5	5.8	5.4	5.8
6.2	NaN	5.1	5.1	5	5.9	6.1	6.9	NaN	NaN	5.9	5.4	NaN	NaN	5.3	5.7	5.3	NaN	7.3	4	5	5.9	5.1	5	NaN	NaN	NaN	5.1	9.2	NaN	5.2	6.2	5.6	5.2	5.1	5.2	5.5	5.2	5.2	5.9	5	5.2	NaN	5.1	NaN	5.7	5.5	5.8	5.4	6.2
6.2	NaN	5.1	5.1	5	5.9	7.3	7.2	NaN	NaN	5.9	5.3	NaN	NaN	5.1	5.2	5.2	NaN	7.1	NaN	5	5.9	5.1	5	NaN	NaN	NaN	5.1	8.8	NaN	5.1	5	5.8	5.2	5.1	5.2	5.1	5.2	5.2	5.9	5	5.2	NaN	5.1	NaN	5.7	5.5	5.8	5.4	5.8
6.2	NaN	5.1	5.1	5	NaN	6.2	7.2	NaN	NaN	5.9	5.2	NaN	NaN	5.1	5.2	5.2	NaN	5.1	5.7	5	5.9	5.1	5	NaN	NaN	NaN	5.1	5.8	NaN	5.7	6.7	5.6	5.2	5.1	5.6	5.4	5.2	5.2	5.9	5	6.4	NaN	5.1	5.4	5.7	5.5	5.8	5.4	5.8
6.2	NaN	5.1	5.1	5	NaN	7.2	5.8	NaN	NaN	NaN	5.2	NaN	NaN	5.2	5.2	5.2	NaN	5.1	NaN	5	5.9	5.1	5	NaN	NaN	NaN	5.5	5.3	5.4	5.6	6	7.5	5.2	5.1	5.2	5.4	NaN	5.2	5.9	5	5.2	NaN	NaN	5.4	5.7	5.9	5.8	5.4	NaN
6.2	NaN	5.1	5.1	5	NaN	8.5	7	NaN	NaN	5.9	5.2	NaN	NaN	5.1	5.2	5.2	NaN	5.1	5.4	5.2	5.9	5.1	5	NaN	NaN	NaN	5.1	5.8	NaN	6	6.7	5.6	5.2	5.1	5.6	5.3	5.2	5.2	5.9	5	6.1	NaN	5.3	5.4	5.7	7.7	5.8	5.4	6
6.2	NaN	5.1	5.1	5	5.9	7	5.8	NaN	NaN	5.9	5.2	NaN	NaN	5.1	5.2	5.2	NaN	5.1	NaN	5	5.9	5.1	5	NaN	NaN	NaN	5.1	5.3	5.4	5.1	5.4	8.5	5.2	5.2	5.2	5.1	5.2	5.2	5.9	5	5.2	NaN	5.1	5.4	5.7	5.5	5.8	5.4	5.8
NaN	NaN	5.1	5.1	5	NaN	5.7	5.9	NaN	NaN	5.9	5.3	NaN	NaN	5.1	5.3	5.2	NaN	5.3	NaN	5	5.9	5.1	5.2	NaN	NaN	NaN	5.4	5.8	NaN	5.1	5.2	5.6	5.2	5.1	5.2	5.2	5.2	5.2	5.9	5	5.2	NaN	5.1	5.4	5.7	5.5	5.8	5.4	6.2
5.8	5.4	5.1	5.1	5	5.2	NaN	6.4	NaN	NaN	5.2	5.1	5.6	5.4	NaN	NaN	NaN	NaN	5.1	4	5	NaN	5.1	5.2	5.4	8.7	5.8	5.2	5	5.4	5.4	5.6	7.6	5.4	5.1	NaN	NaN	NaN	5.2	5.5	NaN	5.4	5.6	NaN	NaN	5.7	6.3	5.8	5.4	NaN
6.2	NaN	NaN	NaN	NaN	NaN	NaN	6.3	NaN	NaN	NaN	NaN	NaN	NaN	NaN	NaN	NaN	NaN	NaN	NaN	NaN	NaN	NaN	NaN	NaN	NaN	NaN	NaN	NaN	NaN	NaN	NaN	8.9	NaN	NaN	NaN	NaN	NaN	NaN	NaN	NaN	NaN	NaN	NaN	NaN	NaN	NaN	NaN	NaN	NaN
6.2	NaN	5.1	5.1	5	5.9	5.7	5.8	NaN	NaN	5.9	5.3	NaN	NaN	5.5	5.3	5.2	NaN	5.1	4	5	5.9	5.1	5.1	NaN	NaN	NaN	5.1	5.8	NaN	5.1	5	6.5	5.2	5.1	5.2	5.1	5.2	5.2	5.9	5	5.4	NaN	5.1	5.4	5.7	5.5	5.8	5.4	5.8
6.2	NaN	5.1	5.1	5	5.9	5.7	5.8	NaN	NaN	5.9	5.3	NaN	NaN	5.1	5.2	5.2	NaN	5.1	NaN	5	5.9	5.1	5	NaN	NaN	NaN	5.1	5.8	NaN	5.1	5	6.4	5.2	5.1	5.2	5.1	5.2	5.2	5.9	5	5.2	NaN	5.1	5.4	5.7	5.5	5.8	5.4	5.8
6.2	NaN	5.1	5.1	5	NaN	5.7	5.8	NaN	NaN	NaN	5.2	NaN	NaN	5.1	5.2	5.2	NaN	5.1	4	5	5.9	5.1	5	NaN	NaN	NaN	5.1	5.3	5.4	5.1	5	7.2	5.2	5.1	5.2	5.1	NaN	5.2	5.9	5	5.2	NaN	NaN	5.4	5.7	5.5	5.8	5.4	NaN
NaN	NaN	NaN	NaN	NaN	6.8	NaN	NaN	NaN	NaN	NaN	NaN	NaN	NaN	NaN	NaN	NaN	NaN	NaN	4	NaN	NaN	NaN	NaN	NaN	NaN	NaN	NaN	NaN	NaN	NaN	NaN	NaN	NaN	NaN	NaN	NaN	NaN	NaN	NaN	NaN	NaN	NaN	NaN	NaN	NaN	NaN	NaN	NaN	NaN
NaN	NaN	NaN	NaN	NaN	6.8	NaN	NaN	NaN	NaN	NaN	NaN	NaN	NaN	NaN	NaN	NaN	NaN	NaN	4	NaN	NaN	NaN	NaN	NaN	NaN	NaN	NaN	NaN	NaN	NaN	NaN	NaN	NaN	NaN	NaN	NaN	NaN	NaN	NaN	NaN	NaN	NaN	NaN	NaN	NaN	NaN	NaN	NaN	NaN
NaN	NaN	NaN	NaN	NaN	NaN	NaN	NaN	NaN	NaN	NaN	NaN	NaN	NaN	NaN	NaN	NaN	NaN	NaN	4	NaN	NaN	NaN	NaN	NaN	NaN	NaN	NaN	NaN	NaN	NaN	NaN	NaN	NaN	NaN	NaN	NaN	NaN	NaN	NaN	NaN	NaN	NaN	NaN	NaN	NaN	NaN	NaN	NaN	NaN
NaN	NaN	NaN	NaN	NaN	NaN	NaN	NaN	NaN	NaN	NaN	NaN	NaN	NaN	NaN	NaN	NaN	NaN	NaN	4	NaN	NaN	NaN	NaN	NaN	NaN	NaN	NaN	NaN	NaN	NaN	NaN	NaN	NaN	NaN	NaN	NaN	NaN	NaN	NaN	NaN	NaN	NaN	NaN	NaN	NaN	NaN	NaN	NaN	NaN
NaN	NaN	NaN	NaN	NaN	NaN	NaN	NaN	NaN	NaN	NaN	NaN	NaN	NaN	NaN	NaN	NaN	NaN	NaN	4	NaN	NaN	NaN	NaN	NaN	NaN	NaN	NaN	NaN	NaN	NaN	NaN	NaN	NaN	NaN	NaN	NaN	NaN	NaN	NaN	NaN	NaN	NaN	NaN	NaN	NaN	NaN	NaN	NaN	NaN
NaN	NaN	NaN	NaN	NaN	NaN	NaN	NaN	NaN	NaN	NaN	NaN	NaN	NaN	NaN	NaN	NaN	NaN	NaN	4	NaN	NaN	NaN	NaN	NaN	NaN	NaN	NaN	NaN	NaN	NaN	NaN	NaN	NaN	NaN	NaN	NaN	NaN	NaN	NaN	NaN	NaN	NaN	NaN	NaN	NaN	NaN	NaN	NaN	NaN
NaN	NaN	NaN	NaN	NaN	NaN	NaN	NaN	NaN	NaN	NaN	NaN	NaN	NaN	NaN	NaN	NaN	NaN	NaN	NaN	NaN	NaN	NaN	NaN	NaN	NaN	NaN	NaN	NaN	NaN	NaN	NaN	NaN	NaN	NaN	NaN	NaN	NaN	NaN	NaN	NaN	NaN	NaN	NaN	NaN	NaN	NaN	NaN	NaN	NaN
NaN	NaN	NaN	NaN	NaN	NaN	NaN	NaN	NaN	NaN	NaN	NaN	NaN	NaN	NaN	NaN	NaN	NaN	NaN	NaN	NaN	NaN	NaN	NaN	NaN	NaN	NaN	NaN	NaN	NaN	NaN	NaN	NaN	NaN	NaN	NaN	NaN	NaN	NaN	NaN	NaN	NaN	NaN	NaN	NaN	NaN	NaN	NaN	NaN	NaN
NaN	NaN	NaN	NaN	NaN	NaN	NaN	NaN	NaN	NaN	NaN	NaN	NaN	NaN	NaN	NaN	NaN	NaN	NaN	NaN	NaN	NaN	NaN	NaN	NaN	NaN	NaN	NaN	NaN	NaN	NaN	NaN	NaN	NaN	NaN	NaN	NaN	NaN	NaN	NaN	NaN	NaN	NaN	NaN	NaN	NaN	NaN	NaN	NaN	NaN
7	7	NaN	NaN	NaN	7.6	NaN	NaN	NaN	NaN	6.4	NaN	6.1	5.4	NaN	NaN	NaN	NaN	NaN	NaN	NaN	NaN	NaN	7	7.1	5.4	6.3	6.2	NaN	NaN	6.6	7.6	7.8	5.4	NaN	NaN	NaN	NaN	NaN	6.7	NaN	6.2	7	NaN	NaN	NaN	NaN	NaN	NaN	NaN
5.9	5.4	NaN	NaN	NaN	5.5	NaN	NaN	NaN	NaN	5.7	NaN	NaN	NaN	NaN	NaN	NaN	NaN	NaN	NaN	NaN	NaN	NaN	NaN	NaN	NaN	NaN	NaN	NaN	NaN	NaN	5.7	5.6	NaN	NaN	NaN	NaN	NaN	NaN	NaN	NaN	5.8	NaN	NaN	NaN	NaN	NaN	NaN	NaN	NaN
5.7	5.4	NaN	NaN	NaN	5.5	NaN	NaN	NaN	NaN	5.5	NaN	NaN	NaN	NaN	NaN	NaN	NaN	NaN	4	NaN	NaN	NaN	NaN	NaN	NaN	NaN	NaN	NaN	NaN	NaN	6.6	6.3	NaN	NaN	NaN	NaN	NaN	NaN	NaN	NaN	5.8	NaN	NaN	NaN	NaN	NaN	NaN	NaN	NaN
6.3	NaN	NaN	NaN	NaN	NaN	NaN	NaN	NaN	NaN	5.2	NaN	NaN	NaN	NaN	NaN	NaN	NaN	NaN	NaN	NaN	NaN	NaN	NaN	NaN	NaN	NaN	NaN	NaN	NaN	NaN	NaN	NaN	NaN	NaN	NaN	NaN	NaN	NaN	NaN	NaN	NaN	NaN	NaN	NaN	NaN	NaN	NaN	NaN	NaN
NaN	NaN	NaN	5.1	5	6.1	NaN	6.9	NaN	NaN	NaN	5.3	NaN	NaN	5.1	5.2	5.2	NaN	5.1	NaN	5.1	5.9	5.1	5	NaN	NaN	NaN	5.1	6	NaN	5.1	5	5.6	5.2	6.2	5.2	5.1	5.2	5.2	5.9	5	5.2	NaN	5.1	NaN	7.8	7	8.4	8.3	5.8
NaN	NaN	NaN	NaN	NaN	5.5	NaN	NaN	NaN	NaN	NaN	NaN	NaN	NaN	NaN	NaN	NaN	NaN	NaN	5.5	NaN	NaN	NaN	NaN	NaN	NaN	NaN	NaN	NaN	NaN	NaN	NaN	NaN	NaN	NaN	NaN	NaN	NaN	NaN	NaN	NaN	NaN	NaN	NaN	NaN	NaN	NaN	NaN	NaN	NaN
6.2	NaN	5.1	5.1	5	5.6	NaN	7.7	NaN	NaN	7	5.7	NaN	NaN	5.6	5.4	5.5	NaN	5.1	6.3	6.5	5.9	5.1	5	NaN	NaN	NaN	5.1	6.1	NaN	5.1	5	7.5	5.2	6.1	5.2	5.1	5.2	5.2	6.9	5	5.2	NaN	5.1	NaN	8.2	7	8	8.6	6.1
NaN	NaN	NaN	5.1	5	5.9	NaN	7.2	NaN	NaN	NaN	5.3	NaN	NaN	5.1	5.2	5.2	NaN	5.1	4	6.2	5.9	5.1	5	NaN	NaN	NaN	5.1	6	NaN	5.1	5	6.1	5.2	5.5	5.2	5.1	5.2	5.2	5.9	5	5.2	NaN	5.1	NaN	8.7	5.5	8.4	8	5.8
6.2	NaN	5.1	5.1	5	5.9	NaN	5.8	NaN	NaN	5.9	5.3	NaN	NaN	5.1	5.2	5.2	NaN	5.1	4	5	5.9	5.1	5	NaN	NaN	NaN	5.4	5.8	NaN	5.1	5.1	6.1	5.2	5.1	5.2	5.1	5.2	5.2	5.9	5	5.2	NaN	5.1	NaN	5.7	5.5	5.8	5.4	6
5.6	5.4	NaN	NaN	NaN	5.5	NaN	NaN	NaN	NaN	5.2	NaN	NaN	NaN	NaN	NaN	NaN	NaN	NaN	NaN	NaN	NaN	NaN	NaN	NaN	NaN	NaN	NaN	NaN	NaN	NaN	5.7	6.8	NaN	NaN	NaN	NaN	NaN	NaN	NaN	NaN	5.8	NaN	NaN	NaN	NaN	NaN	NaN	NaN	NaN
5.6	5.4	NaN	NaN	NaN	5.5	NaN	NaN	NaN	NaN	5.2	NaN	NaN	NaN	NaN	NaN	NaN	NaN	NaN	4	NaN	NaN	NaN	NaN	NaN	NaN	NaN	NaN	NaN	NaN	NaN	5.7	6.2	NaN	NaN	NaN	NaN	NaN	NaN	NaN	NaN	5.8	NaN	NaN	NaN	NaN	NaN	NaN	NaN	NaN
5.6	5.4	NaN	NaN	NaN	5.5	NaN	NaN	NaN	NaN	5.2	NaN	NaN	NaN	NaN	NaN	NaN	NaN	NaN	NaN	NaN	NaN	NaN	NaN	NaN	NaN	NaN	NaN	NaN	NaN	NaN	5.7	6.9	NaN	NaN	NaN	NaN	NaN	NaN	NaN	NaN	5.8	NaN	NaN	NaN	NaN	NaN	NaN	NaN	NaN
5.6	5.4	NaN	NaN	NaN	5.5	NaN	NaN	NaN	NaN	5.2	NaN	NaN	NaN	NaN	NaN	NaN	NaN	NaN	NaN	NaN	NaN	NaN	NaN	NaN	NaN	NaN	NaN	NaN	NaN	NaN	5.7	7.1	NaN	NaN	NaN	NaN	NaN	NaN	NaN	NaN	5.8	NaN	NaN	NaN	NaN	NaN	NaN	NaN	NaN
5.6	5.4	NaN	NaN	NaN	5.5	NaN	NaN	NaN	NaN	5.2	NaN	NaN	NaN	NaN	NaN	NaN	NaN	NaN	NaN	NaN	NaN	NaN	NaN	NaN	NaN	NaN	NaN	NaN	NaN	NaN	5.7	5.9	NaN	NaN	NaN	NaN	NaN	NaN	NaN	NaN	5.8	NaN	NaN	NaN	NaN	NaN	NaN	NaN	NaN
5.6	5.4	NaN	NaN	NaN	5.5	NaN	NaN	NaN	NaN	5.2	NaN	NaN	NaN	NaN	NaN	NaN	NaN	NaN	NaN	NaN	NaN	NaN	NaN	NaN	NaN	NaN	NaN	NaN	NaN	NaN	5.7	5.9	NaN	NaN	NaN	NaN	NaN	NaN	NaN	NaN	5.8	NaN	NaN	NaN	NaN	NaN	NaN	NaN	NaN
NaN	NaN	NaN	NaN	NaN	NaN	NaN	NaN	NaN	NaN	5.2	NaN	NaN	NaN	NaN	NaN	NaN	NaN	NaN	NaN	NaN	NaN	NaN	NaN	NaN	NaN	NaN	NaN	NaN	NaN	NaN	NaN	6.2	NaN	NaN	NaN	NaN	NaN	NaN	NaN	NaN	NaN	NaN	NaN	NaN	NaN	NaN	NaN	NaN	NaN
NaN	NaN	NaN	NaN	NaN	NaN	NaN	NaN	NaN	NaN	5.2	NaN	NaN	NaN	NaN	NaN	NaN	NaN	NaN	NaN	NaN	NaN	NaN	NaN	NaN	NaN	NaN	NaN	NaN	NaN	NaN	NaN	NaN	NaN	NaN	NaN	NaN	NaN	NaN	NaN	NaN	6.4	NaN	NaN	NaN	NaN	NaN	NaN	NaN	NaN
5.6	5.4	NaN	NaN	NaN	5.5	NaN	NaN	NaN	NaN	5.2	NaN	NaN	NaN	NaN	NaN	NaN	NaN	NaN	NaN	NaN	NaN	NaN	NaN	NaN	NaN	NaN	NaN	NaN	NaN	NaN	5.7	5.6	NaN	NaN	NaN	NaN	NaN	NaN	NaN	NaN	5.8	NaN	NaN	NaN	NaN	NaN	NaN	NaN	NaN
NaN	NaN	NaN	NaN	NaN	NaN	NaN	NaN	NaN	NaN	NaN	NaN	NaN	NaN	NaN	NaN	NaN	NaN	NaN	NaN	NaN	NaN	NaN	NaN	NaN	NaN	NaN	NaN	NaN	NaN	NaN	NaN	NaN	NaN	NaN	NaN	NaN	NaN	NaN	NaN	NaN	NaN	NaN	NaN	NaN	NaN	NaN	NaN	NaN	NaN
NaN	NaN	NaN	NaN	NaN	6.5	NaN	NaN	NaN	NaN	NaN	NaN	NaN	NaN	NaN	NaN	NaN	NaN	NaN	5.2	NaN	NaN	NaN	NaN	NaN	NaN	NaN	NaN	NaN	NaN	NaN	NaN	NaN	NaN	NaN	NaN	NaN	NaN	NaN	NaN	NaN	NaN	NaN	NaN	NaN	NaN	NaN	NaN	NaN	NaN
NaN	NaN	NaN	NaN	NaN	NaN	NaN	NaN	NaN	NaN	NaN	NaN	NaN	NaN	NaN	NaN	NaN	NaN	NaN	4.5	NaN	6.6	NaN	NaN	NaN	NaN	NaN	NaN	NaN	NaN	NaN	NaN	NaN	NaN	NaN	NaN	NaN	NaN	NaN	NaN	NaN	NaN	NaN	NaN	NaN	NaN	NaN	NaN	NaN	NaN
NaN	NaN	NaN	NaN	NaN	NaN	NaN	NaN	NaN	NaN	NaN	NaN	NaN	NaN	NaN	NaN	NaN	NaN	NaN	5	NaN	NaN	NaN	NaN	NaN	NaN	NaN	NaN	NaN	NaN	NaN	NaN	NaN	NaN	NaN	NaN	NaN	NaN	NaN	NaN	NaN	NaN	NaN	NaN	NaN	NaN	NaN	NaN	NaN	NaN
6.2	7.4	NaN	NaN	NaN	6.3	NaN	NaN	NaN	NaN	5.5	NaN	5.8	5.8	NaN	NaN	NaN	NaN	NaN	NaN	NaN	NaN	NaN	6.5	5.5	6.2	6	6.5	NaN	NaN	7.8	8.8	7.5	7.5	NaN	NaN	NaN	NaN	NaN	7	NaN	7.2	7.7	NaN	NaN	NaN	NaN	NaN	NaN	NaN
6.3	NaN	5.1	5.1	5	NaN	7.1	7	NaN	NaN	5.9	5.5	NaN	NaN	5.1	5.2	5.2	NaN	5.1	NaN	5	5.9	5.1	5	NaN	NaN	NaN	5.1	6.5	NaN	5.3	5.4	5.6	5.2	5.1	5.2	5.1	5.2	5.2	5.9	5	5.2	NaN	5.1	5.4	5.7	5.5	5.8	5.6	6.5
5.6	5.4	NaN	NaN	NaN	5.2	NaN	NaN	NaN	NaN	5.2	NaN	5.6	5.4	NaN	NaN	NaN	NaN	NaN	NaN	NaN	NaN	NaN	5.6	5.4	6.9	5.8	5.5	NaN	NaN	5.4	5.6	5.6	5.4	NaN	NaN	NaN	NaN	NaN	5.3	NaN	5.7	5.6	NaN	NaN	NaN	NaN	NaN	NaN	NaN
NaN	NaN	NaN	NaN	NaN	5.2	NaN	NaN	NaN	NaN	5.2	NaN	NaN	5.1	NaN	NaN	NaN	NaN	NaN	NaN	NaN	NaN	NaN	NaN	NaN	5.5	NaN	NaN	NaN	NaN	NaN	5.7	NaN	NaN	NaN	NaN	NaN	NaN	NaN	NaN	NaN	NaN	NaN	NaN	NaN	NaN	NaN	NaN	NaN	NaN
5.6	5.4	NaN	NaN	NaN	5.2	NaN	NaN	NaN	NaN	5.2	NaN	5.6	5.4	NaN	NaN	NaN	NaN	NaN	NaN	NaN	NaN	NaN	5.5	5.4	6.7	5.8	5.5	NaN	NaN	5.4	5.6	5.6	5.4	NaN	NaN	NaN	NaN	NaN	5.3	NaN	5.7	5.6	NaN	NaN	NaN	NaN	NaN	NaN	NaN
5.6	5.4	NaN	NaN	NaN	5.2	NaN	NaN	NaN	NaN	5.2	NaN	5.6	5.4	NaN	NaN	NaN	NaN	NaN	NaN	NaN	NaN	NaN	5.5	5.4	6.8	5.8	5.5	NaN	NaN	5.4	5.6	5.6	5.4	NaN	NaN	NaN	NaN	NaN	5.3	NaN	5.7	5.6	NaN	NaN	NaN	NaN	NaN	NaN	NaN
5.6	5.4	NaN	NaN	NaN	5.2	NaN	NaN	NaN	NaN	5.2	NaN	5.6	5.4	NaN	NaN	NaN	NaN	NaN	NaN	NaN	NaN	NaN	5.5	5.4	7.2	5.8	5.5	NaN	NaN	6	6.1	5.6	5.4	NaN	NaN	NaN	NaN	NaN	5.3	NaN	5.7	5.6	NaN	NaN	NaN	NaN	NaN	NaN	NaN
NaN	NaN	5.1	5.1	5	NaN	5.7	NaN	NaN	NaN	NaN	5.2	NaN	NaN	5.1	5.2	5.2	NaN	5.1	NaN	5	NaN	5.1	5	NaN	NaN	NaN	5.1	5.6	5.4	5.7	5.4	5.6	5.2	5.1	5.2	5.1	5.2	5.2	6.8	5	5.2	NaN	5.1	5.4	5.7	5.1	NaN	5.4	NaN
7.2	6.1	NaN	NaN	NaN	6.7	NaN	NaN	NaN	NaN	5.4	NaN	7.2	7.2	NaN	NaN	NaN	NaN	NaN	NaN	NaN	NaN	NaN	9.2	8	5.8	6.8	6.6	NaN	NaN	9.1	9.5	6.2	5.7	NaN	NaN	NaN	NaN	NaN	8.3	NaN	9.4	9	NaN	NaN	NaN	NaN	NaN	NaN	NaN
6.2	NaN	8.5	7.8	8.2	5.9	6.1	5.8	NaN	NaN	5.9	6.5	NaN	NaN	6.3	7.6	7.3	NaN	7	NaN	7.4	7.7	7.4	7.7	NaN	NaN	NaN	5.1	6	NaN	NaN	NaN	5.6	6.2	6.9	6.6	6.6	6.3	5.3	6.6	5.1	NaN	NaN	5.7	5.4	NaN	5.5	5.8	5.4	5.8
6.2	NaN	5.9	5.8	6.1	5.9	NaN	5.8	NaN	NaN	5.9	5.8	NaN	NaN	5.7	6.3	5.9	NaN	6.5	NaN	6.7	8.8	7.3	6.4	NaN	NaN	NaN	5.1	5.6	5.4	7	8.1	5.6	5.2	5.5	6	6	6.3	6.3	7	5	7.5	NaN	5.1	NaN	5.7	5.5	5.8	5.4	5.8
6.2	NaN	5.3	5.2	5.7	5.9	NaN	5.8	NaN	NaN	5.9	5.7	NaN	NaN	5.7	5.7	5.8	NaN	6.3	NaN	7.3	8.8	6.9	6.3	5.6	NaN	6.3	5.1	5.8	NaN	6.6	8.2	5.6	5.2	5.1	5.7	5.9	5.9	6.4	6.8	5	7.4	NaN	5.1	NaN	5.7	5.5	5.8	5.4	5.8
NaN	NaN	6.2	5.1	5.2	NaN	NaN	NaN	NaN	NaN	NaN	5.1	NaN	NaN	NaN	NaN	NaN	NaN	NaN	NaN	5	NaN	5.1	5	NaN	NaN	NaN	5.1	5	5.4	NaN	NaN	5.6	NaN	5.1	NaN	NaN	NaN	5.2	NaN	NaN	6.7	NaN	NaN	NaN	NaN	5.5	NaN	5.4	NaN
6.2	NaN	5.7	5.1	5.4	5.9	5.7	5.8	NaN	NaN	5.9	5.7	NaN	NaN	6.2	6.8	6.4	NaN	6.2	NaN	6.2	7	6.6	7	NaN	7.4	NaN	5.1	5.8	NaN	8	NaN	5.6	5.5	6.8	5.7	5.8	5.5	5.2	5.9	5	8	NaN	5.5	5.4	NaN	5.5	5.8	5.4	5.8
6.2	NaN	5.5	5.1	5.7	5.9	5.7	5.8	NaN	NaN	5.9	5.6	NaN	NaN	5.2	5.2	5.6	NaN	5.7	NaN	5	5.9	5.5	5.1	NaN	NaN	NaN	5.1	5.8	NaN	5.6	6.3	5.6	5.2	5.1	5.2	5.1	5.2	5.2	6.6	5.3	6.2	NaN	5.1	5.4	5.7	5.5	5.8	5.4	5.8
6.2	NaN	5.7	5.1	5.2	5.9	5.7	5.8	NaN	NaN	5.9	5.4	NaN	NaN	5.6	5.4	5.7	NaN	5.1	NaN	5	5.9	5.1	5	5.8	NaN	NaN	5.1	5.9	NaN	5.9	5.7	5.6	5.3	5.7	5.3	5.1	5.2	5.2	5.9	5	5.9	NaN	5.1	5.5	5.7	5.5	5.8	5.5	5.8
6.2	NaN	5.2	5.1	5	5.9	5.7	5.8	NaN	NaN	5.9	5.3	NaN	NaN	5.1	5.3	5.2	NaN	6.3	NaN	5.2	5.9	6.4	5.8	NaN	NaN	NaN	5.1	5.8	NaN	7.3	8.3	5.6	5.2	5.1	5.2	5.1	5.2	5.2	5.9	5	7.3	NaN	5.1	5.4	5.7	5.5	5.8	5.4	5.8
6.2	NaN	5.3	5.1	5	NaN	NaN	5.8	NaN	NaN	NaN	NaN	NaN	NaN	NaN	NaN	NaN	NaN	5.1	NaN	5	NaN	5.1	5	NaN	NaN	NaN	5.1	5.5	6	NaN	NaN	5.6	NaN	5.6	NaN	NaN	NaN	5.2	5.9	NaN	6.7	NaN	NaN	NaN	5.7	5.5	5.8	5.4	NaN
6.2	NaN	NaN	7.9	8.4	6.1	6.7	5.8	NaN	NaN	5.9	6.6	NaN	NaN	6.6	7.9	7.8	NaN	7.3	NaN	8.1	7.9	7.6	7.9	7.7	7.9	6.7	5.1	6.4	NaN	NaN	NaN	5.6	6.5	7.4	6.9	6.9	6.8	5.2	6.9	5.7	NaN	NaN	6	5.5	NaN	5.5	5.8	5.4	5.9
6.2	NaN	5.1	5.1	5.7	5.9	NaN	5.8	NaN	NaN	5.9	5.5	NaN	NaN	5.3	5.2	5.5	NaN	6.4	NaN	5.5	7.7	6.6	6.3	NaN	NaN	NaN	5.1	5.8	NaN	7	8	5.6	5.9	5.7	7.1	7.5	7	5.8	6.8	5	7	NaN	5.6	NaN	5.7	5.5	5.8	5.4	5.8
5.6	5.4	NaN	NaN	NaN	5.2	NaN	NaN	NaN	NaN	5.2	NaN	5.7	6	NaN	NaN	NaN	NaN	NaN	NaN	NaN	8.5	NaN	8.1	6.4	7.5	7.9	5.5	NaN	NaN	6.3	7.6	5.8	5.4	NaN	NaN	NaN	NaN	NaN	6.4	NaN	6.1	6.8	NaN	NaN	NaN	NaN	NaN	NaN	NaN
NaN	NaN	5.1	5.1	5	5.9	5.7	5.8	NaN	NaN	5.9	5.6	NaN	NaN	5.4	5.4	5.6	NaN	5.6	4.2	5	6	5.5	5.3	NaN	NaN	NaN	5.1	5.8	NaN	5.5	6.7	5.6	5.2	5.1	5.2	5.1	5.2	5.2	7	5	6.1	NaN	5.3	5.4	5.7	5.5	5.8	5.4	5.8
6.2	NaN	5.1	5.1	5	5.9	5.7	5.8	NaN	NaN	5.9	5.3	NaN	NaN	5.1	5.2	5.2	NaN	5.4	NaN	5	5.9	5.4	5.2	NaN	NaN	NaN	5.1	5.8	NaN	5.5	6.4	5.6	5.2	5.1	5.2	5.1	5.2	5.2	6.3	5	6	NaN	5.4	NaN	5.7	5.5	5.8	5.4	5.8
NaN	NaN	NaN	NaN	NaN	NaN	NaN	NaN	NaN	NaN	NaN	NaN	NaN	NaN	NaN	NaN	NaN	NaN	NaN	NaN	NaN	7.2	6.5	NaN	NaN	NaN	NaN	NaN	NaN	NaN	NaN	NaN	NaN	NaN	NaN	NaN	NaN	NaN	NaN	NaN	NaN	NaN	NaN	NaN	NaN	NaN	NaN	NaN	NaN	NaN
NaN	NaN	NaN	NaN	NaN	NaN	NaN	NaN	NaN	NaN	NaN	NaN	NaN	NaN	NaN	NaN	NaN	NaN	NaN	NaN	NaN	7.9	6.2	NaN	6.7	NaN	7	NaN	NaN	NaN	NaN	7.9	NaN	NaN	NaN	NaN	NaN	NaN	NaN	NaN	NaN	NaN	NaN	NaN	NaN	NaN	NaN	NaN	NaN	NaN
NaN	NaN	NaN	NaN	NaN	NaN	NaN	NaN	NaN	NaN	NaN	NaN	NaN	NaN	NaN	NaN	NaN	NaN	NaN	NaN	NaN	7.8	6	NaN	NaN	NaN	NaN	NaN	NaN	NaN	NaN	8	NaN	NaN	NaN	NaN	NaN	NaN	NaN	NaN	NaN	NaN	NaN	NaN	NaN	NaN	NaN	NaN	NaN	NaN
NaN	NaN	NaN	NaN	NaN	NaN	NaN	NaN	NaN	NaN	NaN	NaN	NaN	NaN	NaN	NaN	NaN	NaN	NaN	NaN	NaN	7.9	5.5	NaN	NaN	NaN	NaN	NaN	NaN	NaN	NaN	7.1	NaN	NaN	NaN	NaN	NaN	NaN	NaN	NaN	NaN	NaN	NaN	NaN	NaN	NaN	NaN	NaN	NaN	NaN
NaN	NaN	NaN	NaN	NaN	NaN	NaN	NaN	NaN	NaN	NaN	NaN	NaN	NaN	NaN	NaN	NaN	NaN	NaN	NaN	NaN	8.6	6.9	NaN	NaN	NaN	NaN	NaN	NaN	NaN	NaN	7.9	NaN	NaN	NaN	NaN	NaN	NaN	NaN	NaN	NaN	NaN	NaN	NaN	NaN	NaN	NaN	NaN	NaN	NaN
NaN	NaN	NaN	NaN	NaN	NaN	NaN	NaN	NaN	NaN	NaN	NaN	NaN	NaN	NaN	NaN	NaN	NaN	NaN	NaN	NaN	7.9	6.3	NaN	NaN	NaN	NaN	NaN	NaN	NaN	NaN	NaN	NaN	NaN	NaN	NaN	NaN	NaN	NaN	NaN	NaN	NaN	NaN	NaN	NaN	NaN	NaN	NaN	NaN	NaN
NaN	NaN	NaN	NaN	NaN	NaN	NaN	NaN	NaN	NaN	NaN	NaN	NaN	NaN	NaN	NaN	NaN	NaN	NaN	NaN	NaN	9.4	6.9	NaN	NaN	NaN	NaN	NaN	NaN	NaN	NaN	NaN	NaN	NaN	NaN	NaN	NaN	NaN	NaN	NaN	NaN	NaN	NaN	NaN	NaN	NaN	NaN	NaN	NaN	NaN
NaN	NaN	NaN	NaN	NaN	5.2	NaN	NaN	NaN	NaN	5.2	NaN	NaN	NaN	NaN	NaN	NaN	NaN	NaN	NaN	NaN	NaN	NaN	NaN	NaN	6.2	NaN	NaN	NaN	NaN	NaN	NaN	NaN	NaN	NaN	NaN	NaN	NaN	NaN	5.3	NaN	NaN	NaN	NaN	NaN	NaN	NaN	NaN	NaN	NaN
NaN	NaN	5.2	5.1	5	5.9	NaN	5.8	NaN	NaN	5.9	5.3	NaN	NaN	5.1	5.2	5.2	NaN	5.1	NaN	5	5.9	5.1	5	NaN	NaN	NaN	5.1	5.5	5.4	5.1	5	5.6	5.2	5.2	5.2	5.1	5.2	5.2	5.9	5	5.5	NaN	5.1	NaN	5.7	5.5	5.8	5.4	5.8
6.2	NaN	5.1	5.1	5	5.7	7	6.6	NaN	NaN	5.9	5.4	NaN	NaN	6.5	7.4	7.3	NaN	6.6	NaN	5.9	7.4	6.8	6.6	NaN	NaN	NaN	5.3	5.4	5.7	7.9	NaN	6.5	5.2	6.2	5.3	5.2	5.2	5.4	5.9	5	7.7	NaN	5.2	5.4	5.7	5.3	5.8	5.4	6.8
6.2	NaN	5.1	5.1	5	5.9	5.7	5.8	NaN	NaN	5.9	5.3	NaN	NaN	5.2	5.4	5.8	NaN	5.4	NaN	5	5.9	5.5	5.3	NaN	NaN	NaN	5.1	5.8	NaN	6.5	7.4	5.6	5.2	6	5.2	5.1	5.2	5.2	5.9	6.5	6	NaN	5.1	5.4	5.7	5.5	5.8	5.4	5.8
6.2	6	5.2	5.1	5.9	5.2	NaN	5.9	NaN	NaN	5.4	5.8	6.6	6.4	5.9	6.1	6.5	NaN	7.4	NaN	5.2	8.9	7.9	7.9	6.9	5.4	6.3	5.4	7.3	NaN	7.2	NaN	5.8	6.4	6	7.6	8.2	7.1	7.8	7.5	5.3	7	7.8	5.2	NaN	5.7	5.5	NaN	5.4	6.6
5.6	5.4	NaN	NaN	NaN	5.2	NaN	NaN	NaN	NaN	5.2	NaN	6.2	5.4	NaN	5.5	NaN	NaN	NaN	NaN	NaN	8.5	7.6	8	6.7	5.4	6.4	5.5	NaN	NaN	6.9	8	5.6	5.8	NaN	NaN	NaN	NaN	NaN	7.3	NaN	7.3	8.3	NaN	NaN	NaN	NaN	NaN	NaN	NaN
6.2	NaN	5.8	5.5	5.8	5.9	5.7	5.8	NaN	NaN	5.9	5.7	NaN	NaN	5.3	5.6	5.9	NaN	6.7	NaN	6.7	7.9	7	6.4	NaN	NaN	NaN	5.1	5.8	NaN	6.9	8.2	5.6	5.2	5.1	5.9	5.9	6.3	6.1	6.3	5	7.2	NaN	5.5	5.4	NaN	5.5	NaN	5.4	5.8
6.2	NaN	5.8	5.4	6.6	5.9	NaN	5.8	NaN	NaN	5.9	5.9	NaN	NaN	5.6	6.3	6.3	NaN	8	NaN	5.2	9.2	7.6	7.9	7	5.9	6.9	5.2	7.7	NaN	7.8	NaN	5.6	6.6	5.9	7.9	8.4	7.7	8.2	7.3	5.4	7.5	NaN	5.7	NaN	5.7	5.5	5.8	5.4	6.1
6.2	NaN	5.3	5.1	5.1	NaN	5.7	5.8	NaN	NaN	5.9	5.2	NaN	NaN	5.1	5.2	5.2	NaN	7	NaN	7.5	6.3	7	5.1	NaN	NaN	NaN	5.1	5.8	NaN	5.1	6.1	5.6	5.2	5.1	NaN	5.2	NaN	5.2	5.9	5	6.7	NaN	5.1	5.4	5.7	5.5	5.8	5.4	5.8
6.2	NaN	5.5	5.1	5	5.9	5.7	5.8	NaN	NaN	5.9	5.1	NaN	NaN	5.1	5.2	5.2	NaN	6.3	NaN	6.8	5.9	6.2	5.7	NaN	NaN	NaN	5.1	5.8	NaN	5.4	6.1	5.6	5.2	5.1	5.2	5.1	5.2	5.2	5.9	5	6.9	NaN	5.1	NaN	5.7	5.5	5.8	5.4	5.8
6.2	NaN	5.1	5.1	5	5.9	5.7	5.8	NaN	NaN	5.9	5.3	NaN	NaN	5.1	5.2	5.2	NaN	6.2	4	6.7	6.2	6.7	5.8	NaN	NaN	NaN	5.1	5.8	NaN	5.5	6.3	5.6	5.2	5.1	5.2	5.3	5.2	5.2	5.9	5	5.8	NaN	5.1	NaN	5.7	5.5	5.8	5.4	5.8
NaN	NaN	NaN	NaN	NaN	NaN	NaN	NaN	NaN	NaN	NaN	NaN	NaN	NaN	NaN	6.6	NaN	NaN	NaN	NaN	NaN	9.4	6.8	6.8	6.7	7.9	6.9	NaN	NaN	NaN	6.7	NaN	NaN	6.5	NaN	NaN	NaN	NaN	NaN	7.3	NaN	7.7	NaN	NaN	NaN	NaN	NaN	NaN	NaN	NaN
NaN	NaN	NaN	NaN	NaN	NaN	NaN	NaN	NaN	NaN	NaN	NaN	NaN	NaN	NaN	5.8	NaN	NaN	NaN	NaN	NaN	9.4	6.6	6.8	6.4	7.5	5.8	NaN	NaN	NaN	7.5	8.6	NaN	5.4	NaN	NaN	NaN	NaN	NaN	7.8	NaN	6.8	NaN	NaN	NaN	NaN	NaN	NaN	NaN	NaN
NaN	NaN	NaN	NaN	NaN	NaN	NaN	NaN	NaN	NaN	NaN	NaN	NaN	NaN	NaN	5.7	NaN	NaN	NaN	NaN	NaN	9.1	7.4	7.2	6.9	5.4	5.8	NaN	NaN	NaN	7.5	NaN	NaN	5.9	NaN	NaN	NaN	NaN	NaN	7.9	NaN	7.5	NaN	NaN	NaN	NaN	NaN	NaN	NaN	NaN
6.2	NaN	5.1	5.1	5	5.9	5.7	5.8	NaN	NaN	5.9	5.3	NaN	NaN	5.1	5.2	5.2	NaN	5.1	NaN	5	5.9	5.1	5	NaN	NaN	NaN	5.1	5.8	NaN	5.2	6.2	5.6	5.2	5.1	7.7	5.1	5.2	5.2	5.9	5	5.2	NaN	5.1	NaN	5.7	5.5	5.8	5.4	5.8
6.2	NaN	5.1	5.1	5	5.9	5.7	5.8	NaN	NaN	NaN	5.2	NaN	NaN	NaN	NaN	NaN	NaN	7	NaN	5	6.6	7.6	7	NaN	5.5	NaN	5.1	5.6	5.4	6.2	7.1	5.6	5.2	5.3	NaN	7.5	NaN	5.5	6	5	6.8	NaN	NaN	5.4	5.7	5.1	5.8	5.4	NaN
NaN	NaN	NaN	NaN	NaN	NaN	NaN	NaN	NaN	NaN	NaN	NaN	NaN	NaN	NaN	NaN	NaN	NaN	NaN	NaN	NaN	8.6	8.4	NaN	NaN	NaN	NaN	NaN	NaN	NaN	NaN	8.1	NaN	NaN	NaN	NaN	NaN	NaN	NaN	NaN	NaN	NaN	NaN	NaN	NaN	NaN	NaN	NaN	NaN	NaN
NaN	NaN	NaN	NaN	NaN	NaN	NaN	NaN	NaN	NaN	NaN	NaN	NaN	NaN	NaN	5.5	NaN	NaN	NaN	NaN	NaN	8.5	7.9	8.3	7.6	5.6	6.7	NaN	NaN	NaN	7.4	8.9	NaN	6.6	NaN	NaN	NaN	NaN	NaN	6.9	NaN	7.5	NaN	NaN	NaN	NaN	NaN	NaN	NaN	NaN
NaN	NaN	NaN	NaN	NaN	NaN	NaN	NaN	NaN	NaN	NaN	NaN	NaN	NaN	NaN	5.5	NaN	NaN	NaN	NaN	NaN	8.9	7.5	7.9	7	5.6	7.1	NaN	NaN	NaN	7.1	8.4	NaN	5.9	NaN	NaN	NaN	NaN	NaN	6.8	NaN	7.5	NaN	NaN	NaN	NaN	NaN	NaN	NaN	NaN
NaN	NaN	NaN	NaN	NaN	NaN	NaN	NaN	NaN	NaN	NaN	NaN	NaN	NaN	NaN	5.5	NaN	NaN	NaN	NaN	NaN	9.1	7.9	8.2	7.6	5.7	6.9	NaN	NaN	NaN	7.6	NaN	NaN	6.8	NaN	NaN	NaN	NaN	NaN	7.3	NaN	7.9	NaN	NaN	NaN	NaN	NaN	NaN	NaN	NaN
NaN	NaN	NaN	NaN	NaN	NaN	NaN	NaN	NaN	NaN	NaN	NaN	NaN	NaN	NaN	NaN	NaN	NaN	NaN	NaN	NaN	8.4	6.6	NaN	NaN	NaN	NaN	NaN	NaN	NaN	NaN	8.4	NaN	NaN	NaN	NaN	NaN	NaN	NaN	NaN	NaN	NaN	NaN	NaN	NaN	NaN	NaN	NaN	NaN	NaN
NaN	NaN	NaN	NaN	NaN	NaN	NaN	NaN	NaN	NaN	NaN	NaN	NaN	NaN	NaN	5.5	NaN	NaN	NaN	NaN	NaN	9.1	7.1	7.6	6.8	5.4	6.2	NaN	NaN	NaN	7	8.1	NaN	5.5	NaN	NaN	NaN	NaN	NaN	6.6	NaN	7.4	NaN	NaN	NaN	NaN	NaN	NaN	NaN	NaN
NaN	NaN	NaN	NaN	NaN	NaN	NaN	NaN	NaN	NaN	NaN	NaN	NaN	NaN	NaN	5.5	NaN	NaN	NaN	NaN	NaN	8.9	7.7	7.7	7	5.4	6.6	NaN	NaN	NaN	6.6	NaN	NaN	5.6	NaN	NaN	NaN	NaN	NaN	6.6	NaN	7	NaN	NaN	NaN	NaN	NaN	NaN	NaN	NaN
NaN	NaN	NaN	NaN	NaN	NaN	NaN	NaN	NaN	NaN	NaN	NaN	NaN	NaN	NaN	5.5	NaN	NaN	NaN	NaN	NaN	9.5	7.3	7.5	7	5.4	6.7	NaN	NaN	NaN	7.1	8.4	NaN	5.8	NaN	NaN	NaN	NaN	NaN	7.4	NaN	7.5	NaN	NaN	NaN	NaN	NaN	NaN	NaN	NaN
NaN	NaN	5.1	5.1	5	NaN	NaN	NaN	NaN	NaN	NaN	5.3	NaN	NaN	5.1	5.2	5.2	NaN	5.1	NaN	5	NaN	5.1	5	NaN	NaN	NaN	5.1	NaN	NaN	5.2	6.4	NaN	5.2	5.1	NaN	5.1	5.2	5.2	NaN	5	5.2	NaN	5.1	NaN	NaN	NaN	NaN	5.4	NaN
NaN	NaN	NaN	NaN	NaN	NaN	NaN	NaN	NaN	NaN	NaN	NaN	NaN	NaN	NaN	NaN	NaN	NaN	NaN	NaN	NaN	NaN	NaN	NaN	NaN	NaN	NaN	NaN	NaN	NaN	NaN	NaN	NaN	NaN	NaN	NaN	NaN	NaN	NaN	NaN	NaN	NaN	NaN	NaN	NaN	NaN	NaN	NaN	NaN	NaN
6.2	NaN	5.7	5.4	5.3	5.9	5.7	5.8	NaN	NaN	5.9	5.3	NaN	NaN	5.1	5.2	5.2	NaN	5.3	NaN	5.3	5.9	5.5	5.2	NaN	NaN	NaN	5.1	5.8	NaN	5.3	6.4	5.6	5.2	5.1	5.2	5.1	5.2	5.2	5.9	5	5.6	NaN	5.1	5.4	NaN	5.5	5.8	5.4	5.8
6.2	NaN	5.5	5.2	5	NaN	5.7	5.8	NaN	NaN	5.9	5.3	NaN	NaN	5.1	5.2	5.2	NaN	5.1	NaN	5.1	5.9	5.1	5	NaN	NaN	NaN	5.1	5.8	NaN	5.1	7.1	5.6	5.2	5.1	5.2	5.1	5.2	5.2	5.9	5	5.2	NaN	5.1	5.4	NaN	5.5	NaN	5.4	5.8
6.2	NaN	6.7	6.5	6.2	5.9	5.7	5.8	NaN	NaN	5.9	5.3	NaN	NaN	5.1	5.2	5.2	NaN	5.1	NaN	6.5	5.9	5.6	5.2	NaN	NaN	NaN	5.1	6.4	NaN	5.1	6.5	5.6	5.2	5.1	5.2	5.1	5.2	5.2	5.9	5	5.3	NaN	5.1	5.4	5.7	5.5	5.8	5.4	5.8
6.2	NaN	6.2	5.9	5.7	5.9	NaN	5.8	NaN	NaN	5.9	5.3	NaN	NaN	5.1	5.2	5.2	NaN	5.8	NaN	5.7	5.9	5.7	5.1	NaN	NaN	NaN	5.3	5.8	NaN	5.4	6.1	5.6	5.2	5.1	5.2	5.1	5.2	5.2	5.9	5	5.6	NaN	5.1	NaN	5.7	5.5	5.8	5.4	5.8
6.2	NaN	5.9	5.9	5.4	5.9	NaN	5.8	NaN	NaN	5.9	5.3	NaN	NaN	5.1	5.2	5.2	NaN	5.5	NaN	5.8	5.9	5.7	5.2	NaN	NaN	NaN	5.1	5.8	NaN	5.1	5.8	5.6	5.2	5.1	5.2	5.1	5.2	5.2	5.9	5	5.2	NaN	5.1	NaN	5.7	5.5	5.8	5.4	5.8
6.2	NaN	5.7	5.4	5.1	5.9	NaN	5.8	NaN	NaN	5.9	5.3	NaN	NaN	5.1	5.2	5.2	NaN	5.1	NaN	5.7	5.9	5.4	5	NaN	NaN	NaN	5.1	5.8	NaN	5.1	5.7	5.6	5.2	5.1	5.2	5.1	5.2	5.2	5.9	5	5.2	NaN	5.1	NaN	5.7	5.5	5.8	5.4	5.8
6.2	NaN	6.4	6.2	5.8	5.9	NaN	5.8	NaN	NaN	5.9	5.3	NaN	NaN	5.1	5.2	5.2	NaN	5.1	NaN	5.4	5.9	5.7	5	NaN	NaN	NaN	5.1	5.8	NaN	5.4	6	5.6	5.2	5.6	6	5.6	5.8	5.2	5.9	5	7.1	NaN	5.1	NaN	5.7	5.5	5.8	5.4	5.8
6.2	NaN	5.8	5.4	5.5	5.9	NaN	5.8	NaN	NaN	5.9	5.3	NaN	NaN	5.1	5.2	5.2	NaN	5.1	NaN	6	5.9	5.2	5	NaN	NaN	NaN	5.1	5.8	NaN	5.1	5.5	5.6	5.2	5.1	5.2	5.1	5.2	5.2	5.9	5	5.4	NaN	5.1	NaN	5.7	5.5	5.8	5.4	NaN
6.2	NaN	5.5	5.1	5	NaN	5.7	5.8	NaN	NaN	5.9	5.3	NaN	NaN	5.1	5.2	5.2	NaN	5.3	NaN	5.3	5.9	5.4	5	NaN	NaN	NaN	5.1	5.8	NaN	5.1	6.2	5.6	5.2	5.1	5.2	5.1	5.2	5.2	5.9	5	5.2	NaN	5.1	5.4	NaN	5.5	NaN	5.4	5.8
6.2	NaN	5.1	5.6	5	5.9	NaN	5.8	NaN	NaN	5.9	5.2	NaN	NaN	5.1	5.2	5.2	NaN	5.1	NaN	5	5.9	6.1	5.3	NaN	NaN	NaN	5.1	5.8	NaN	5.1	7.2	5.6	5.2	5.1	5.2	5.1	5.2	5.2	5.9	5	5.2	NaN	5.1	NaN	5.7	5.5	5.8	5.4	5.8
NaN	NaN	NaN	NaN	NaN	NaN	NaN	NaN	NaN	NaN	NaN	NaN	4	NaN	NaN	NaN	NaN	NaN	NaN	NaN	NaN	NaN	NaN	NaN	NaN	NaN	NaN	NaN	NaN	NaN	NaN	NaN	NaN	NaN	NaN	NaN	NaN	NaN	NaN	NaN	NaN	NaN	NaN	NaN	NaN	NaN	NaN	NaN	NaN	NaN
NaN	NaN	NaN	NaN	NaN	NaN	NaN	NaN	NaN	NaN	NaN	NaN	NaN	NaN	NaN	NaN	NaN	NaN	NaN	NaN	NaN	6.9	NaN	NaN	5.6	NaN	6	NaN	NaN	NaN	NaN	NaN	NaN	NaN	NaN	NaN	NaN	NaN	NaN	NaN	NaN	NaN	NaN	NaN	NaN	NaN	NaN	NaN	NaN	NaN
NaN	NaN	NaN	NaN	NaN	NaN	NaN	NaN	NaN	NaN	NaN	NaN	NaN	NaN	NaN	NaN	NaN	NaN	NaN	NaN	NaN	8.1	6	NaN	NaN	NaN	NaN	NaN	NaN	NaN	NaN	7.4	NaN	NaN	NaN	NaN	NaN	NaN	NaN	NaN	NaN	NaN	NaN	NaN	NaN	NaN	NaN	NaN	NaN	NaN
NaN	NaN	NaN	NaN	NaN	NaN	NaN	NaN	NaN	NaN	NaN	NaN	NaN	NaN	NaN	NaN	NaN	NaN	NaN	NaN	NaN	7	5.1	NaN	NaN	NaN	NaN	NaN	NaN	NaN	NaN	6.5	NaN	NaN	NaN	NaN	NaN	NaN	NaN	NaN	NaN	NaN	NaN	NaN	NaN	NaN	NaN	NaN	NaN	NaN
NaN	NaN	NaN	NaN	NaN	NaN	NaN	NaN	NaN	NaN	NaN	NaN	NaN	NaN	NaN	NaN	NaN	NaN	NaN	NaN	NaN	6.8	5.5	NaN	NaN	NaN	NaN	NaN	NaN	NaN	NaN	7	NaN	NaN	NaN	NaN	NaN	NaN	NaN	NaN	NaN	NaN	NaN	NaN	NaN	NaN	NaN	NaN	NaN	NaN
NaN	NaN	5.1	5.1	5	5.9	5.7	5.8	NaN	NaN	NaN	5.3	NaN	NaN	5.1	5.2	5.2	NaN	5.1	NaN	5	5.9	5.1	5	NaN	NaN	NaN	5.1	5.8	NaN	5.1	5.9	5.6	5.2	5.1	6.2	5.1	5.2	5.2	5.9	5	5.2	NaN	5.1	NaN	5.7	5.5	5.8	5.4	5.8
5.6	5.4	NaN	NaN	NaN	5.2	NaN	NaN	NaN	NaN	5.2	NaN	5.6	5.4	NaN	NaN	NaN	NaN	NaN	NaN	NaN	NaN	NaN	6.4	5.4	7.1	7	5.5	NaN	NaN	5.5	7.8	5.6	5.4	NaN	NaN	NaN	NaN	NaN	5.3	NaN	6.6	6.5	NaN	NaN	NaN	NaN	NaN	NaN	NaN
4.3	4.1	NaN	NaN	NaN	NaN	NaN	NaN	NaN	NaN	NaN	NaN	4.3	4.1	NaN	NaN	NaN	NaN	NaN	NaN	NaN	NaN	NaN	5.7	4.1	4.1	4.5	4.2	NaN	NaN	4.1	5.4	4.3	4.1	NaN	NaN	NaN	NaN	NaN	NaN	NaN	4.9	4.3	NaN	NaN	NaN	NaN	NaN	NaN	NaN
5.4	5.4	NaN	NaN	NaN	5.2	NaN	NaN	NaN	NaN	5.2	NaN	5.6	5.1	NaN	NaN	NaN	NaN	NaN	NaN	NaN	NaN	NaN	5.5	5.4	5.6	5.8	5.5	NaN	NaN	5.4	6.5	5.6	5.4	NaN	NaN	NaN	NaN	NaN	5.3	NaN	5.7	5.6	NaN	NaN	NaN	NaN	NaN	NaN	NaN
NaN	NaN	NaN	NaN	NaN	NaN	NaN	NaN	NaN	NaN	NaN	NaN	4	NaN	NaN	NaN	NaN	NaN	NaN	NaN	NaN	NaN	NaN	NaN	NaN	NaN	4.2	NaN	NaN	NaN	NaN	5.6	4	NaN	NaN	NaN	NaN	NaN	NaN	5.5	NaN	4.1	NaN	NaN	NaN	NaN	NaN	NaN	NaN	NaN
NaN	NaN	5.1	5.1	5	NaN	5.7	5.8	NaN	NaN	NaN	5.2	NaN	NaN	5.1	5.2	5.2	NaN	5.1	NaN	5	NaN	5.1	5	NaN	NaN	NaN	5.1	5.3	5.4	5.1	6.2	5.6	5.2	5.1	5.2	5.1	5.2	5.2	NaN	5	5.2	NaN	5.1	5.4	5.7	5.5	5.8	5.4	5.8
6.2	NaN	5.2	5.1	5	5.9	5.7	5.8	NaN	NaN	5.9	5.2	NaN	NaN	5.1	5.2	5.2	NaN	5.1	NaN	5	5.9	5.1	5	NaN	NaN	NaN	5.1	5.3	5.4	5.1	6.8	5.6	5.2	5.1	5.2	5.1	5.2	5.2	5.9	5	5.2	NaN	5.1	5.4	5.7	5.5	5.8	5.4	5.8
NaN	5.4	NaN	NaN	NaN	5.2	NaN	NaN	NaN	NaN	5.2	NaN	5.6	5.1	NaN	NaN	NaN	NaN	NaN	NaN	NaN	NaN	NaN	5.5	5.4	5.4	5.8	NaN	NaN	NaN	5.4	7	5.6	5.4	NaN	NaN	NaN	NaN	NaN	5.3	NaN	5.7	5.6	NaN	NaN	NaN	NaN	NaN	NaN	NaN
NaN	NaN	NaN	NaN	NaN	NaN	NaN	NaN	NaN	NaN	NaN	NaN	4	NaN	NaN	NaN	NaN	NaN	NaN	NaN	NaN	NaN	NaN	NaN	NaN	NaN	4.2	NaN	NaN	NaN	NaN	6	4	NaN	NaN	NaN	NaN	NaN	NaN	NaN	NaN	4.1	4.7	NaN	NaN	NaN	NaN	NaN	NaN	NaN
5.4	5.4	NaN	NaN	NaN	5.2	NaN	NaN	NaN	NaN	5.2	NaN	5.6	5.1	NaN	NaN	NaN	NaN	NaN	NaN	NaN	NaN	NaN	5.5	5.4	5.4	5.8	5.5	NaN	NaN	5.4	5.6	5.6	5.4	NaN	NaN	NaN	NaN	NaN	5.3	NaN	5.7	5.6	NaN	NaN	NaN	NaN	NaN	NaN	NaN
NaN	NaN	NaN	NaN	NaN	NaN	NaN	NaN	NaN	NaN	NaN	NaN	NaN	NaN	NaN	NaN	NaN	NaN	NaN	NaN	NaN	NaN	NaN	NaN	NaN	NaN	NaN	NaN	NaN	NaN	NaN	NaN	NaN	NaN	NaN	NaN	NaN	NaN	NaN	NaN	NaN	NaN	NaN	NaN	NaN	NaN	NaN	NaN	NaN	NaN
8.1	6.8	5.4	5.1	5	8.4	NaN	9	NaN	NaN	6.9	6.5	6	6.2	6.4	7.7	7.4	8.9	NaN	4	7	8.3	NaN	NaN	7.5	5.4	7	7.3	7.1	NaN	6.6	7.6	6.8	5.4	5.1	5.2	5.1	5.2	6.9	5.3	6.9	6.6	6.5	5.9	NaN	7.1	8.2	6.8	6.8	NaN
6.7	NaN	5.1	5.1	5.1	6.7	7.9	7.1	NaN	NaN	6.8	5.7	NaN	NaN	5.1	5.6	6	NaN	6.1	NaN	5	6.2	6.7	6.4	NaN	NaN	NaN	5.2	7	NaN	6.4	6.6	6.5	5.2	5.1	5.5	5.7	5.2	6.2	6.5	5.2	5.7	NaN	5.1	5.4	6.4	5.9	6.1	6.9	6
NaN	6.9	NaN	NaN	NaN	7	NaN	NaN	NaN	NaN	6.4	NaN	5.9	5.4	NaN	NaN	NaN	NaN	NaN	6	NaN	NaN	NaN	6.7	7.2	5.4	6.2	NaN	NaN	NaN	6.4	7.6	8.2	5.6	NaN	NaN	NaN	NaN	NaN	6.7	NaN	5.8	6.8	NaN	NaN	NaN	NaN	NaN	NaN	NaN
6.2	NaN	5.1	5.1	5	8.8	7.2	7.1	NaN	NaN	NaN	6.6	NaN	NaN	NaN	NaN	NaN	NaN	7.4	NaN	6.3	6.3	7	7.2	NaN	NaN	NaN	6.1	6.6	5.4	7.7	7.6	6.8	5.2	5.1	NaN	5.1	NaN	5.7	6.2	6.5	6.3	NaN	NaN	5.4	7	5.9	6.6	5.9	NaN
6.2	NaN	5.1	5.1	5	6.6	7.2	6.4	NaN	NaN	5.9	5.7	NaN	NaN	5.1	5.8	6.1	NaN	6.3	4	5	5.9	7	6.7	NaN	NaN	NaN	5.1	6.6	NaN	5.7	6.5	6.6	5.2	5.1	5.2	5.4	5.2	5.6	6.7	5	5.4	NaN	5.1	5.4	6.2	5.5	5.9	6.2	5.8
NaN	NaN	NaN	NaN	NaN	6.9	NaN	NaN	NaN	NaN	NaN	NaN	NaN	NaN	NaN	7.5	NaN	NaN	NaN	4	NaN	8.6	8.8	NaN	8.5	6.1	8.7	NaN	NaN	NaN	8.4	NaN	NaN	7	NaN	NaN	NaN	NaN	NaN	7.9	NaN	8.2	NaN	NaN	NaN	NaN	NaN	NaN	NaN	NaN
NaN	NaN	NaN	NaN	NaN	6	NaN	NaN	NaN	NaN	NaN	NaN	NaN	NaN	NaN	NaN	NaN	NaN	NaN	5.3	NaN	NaN	NaN	NaN	NaN	NaN	NaN	NaN	NaN	NaN	NaN	NaN	NaN	NaN	NaN	NaN	NaN	NaN	NaN	NaN	NaN	NaN	NaN	NaN	NaN	NaN	NaN	NaN	NaN	NaN
NaN	NaN	NaN	NaN	NaN	5.8	NaN	NaN	NaN	NaN	NaN	NaN	NaN	NaN	NaN	NaN	NaN	NaN	NaN	5.7	NaN	NaN	NaN	NaN	NaN	NaN	NaN	NaN	NaN	NaN	NaN	NaN	NaN	NaN	NaN	NaN	NaN	NaN	NaN	NaN	NaN	NaN	NaN	NaN	NaN	NaN	NaN	NaN	NaN	NaN
NaN	NaN	NaN	NaN	NaN	5.9	NaN	NaN	NaN	NaN	NaN	NaN	NaN	NaN	NaN	NaN	NaN	NaN	NaN	5.7	NaN	NaN	NaN	NaN	NaN	NaN	NaN	NaN	NaN	NaN	NaN	NaN	NaN	NaN	NaN	NaN	NaN	NaN	NaN	NaN	NaN	NaN	NaN	NaN	NaN	NaN	NaN	NaN	NaN	NaN
NaN	NaN	NaN	NaN	NaN	5.5	NaN	NaN	NaN	NaN	NaN	NaN	NaN	NaN	NaN	NaN	NaN	NaN	NaN	5.2	NaN	NaN	NaN	NaN	NaN	NaN	NaN	NaN	NaN	NaN	NaN	NaN	NaN	NaN	NaN	NaN	NaN	NaN	NaN	NaN	NaN	NaN	NaN	NaN	NaN	NaN	NaN	NaN	NaN	NaN
NaN	NaN	NaN	NaN	NaN	NaN	NaN	NaN	NaN	NaN	NaN	NaN	NaN	NaN	NaN	7	NaN	NaN	NaN	4	NaN	8.3	8.9	NaN	8.2	5.4	8.6	NaN	NaN	NaN	8	NaN	NaN	6.7	NaN	NaN	NaN	NaN	NaN	8.3	NaN	8	NaN	NaN	NaN	NaN	NaN	NaN	NaN	NaN
NaN	NaN	NaN	NaN	NaN	NaN	NaN	NaN	NaN	NaN	NaN	NaN	NaN	NaN	NaN	NaN	NaN	NaN	NaN	NaN	NaN	8.3	NaN	NaN	8.3	NaN	7.4	NaN	NaN	NaN	NaN	NaN	NaN	NaN	NaN	NaN	NaN	NaN	NaN	NaN	NaN	NaN	NaN	NaN	NaN	NaN	NaN	NaN	NaN	NaN
NaN	NaN	NaN	NaN	NaN	NaN	NaN	NaN	NaN	NaN	NaN	NaN	NaN	NaN	NaN	5.5	NaN	NaN	NaN	NaN	NaN	8.6	6	5.5	5.4	5.4	6.1	NaN	NaN	NaN	5.4	5.6	NaN	5.4	NaN	NaN	NaN	NaN	NaN	6.2	NaN	5.8	NaN	NaN	NaN	NaN	NaN	NaN	NaN	NaN
NaN	NaN	NaN	NaN	NaN	NaN	NaN	NaN	NaN	NaN	NaN	NaN	NaN	NaN	NaN	5.5	NaN	NaN	NaN	NaN	NaN	NaN	6.5	6.6	5.8	5.4	6.7	NaN	NaN	NaN	5.5	6.9	NaN	5.7	NaN	NaN	NaN	NaN	NaN	6.7	NaN	6.6	NaN	NaN	NaN	NaN	NaN	NaN	NaN	NaN
NaN	NaN	NaN	NaN	NaN	NaN	NaN	NaN	NaN	NaN	NaN	NaN	NaN	NaN	NaN	5.5	NaN	NaN	NaN	NaN	NaN	9.4	6.2	6.2	5.8	5.4	6.8	NaN	NaN	NaN	5.4	6.3	NaN	5.8	NaN	NaN	NaN	NaN	NaN	6.5	NaN	6.1	NaN	NaN	NaN	NaN	NaN	NaN	NaN	NaN
NaN	NaN	NaN	NaN	NaN	NaN	NaN	NaN	NaN	NaN	NaN	NaN	NaN	NaN	NaN	NaN	NaN	NaN	NaN	NaN	NaN	7.5	5.1	NaN	NaN	NaN	NaN	NaN	NaN	NaN	NaN	5.3	NaN	NaN	NaN	NaN	NaN	NaN	NaN	NaN	NaN	NaN	NaN	NaN	NaN	NaN	NaN	NaN	NaN	NaN
NaN	NaN	NaN	NaN	NaN	NaN	NaN	NaN	NaN	NaN	NaN	NaN	NaN	NaN	NaN	NaN	NaN	NaN	NaN	NaN	NaN	NaN	NaN	NaN	NaN	NaN	NaN	NaN	NaN	NaN	NaN	NaN	NaN	NaN	NaN	NaN	NaN	NaN	5	NaN	NaN	NaN	NaN	NaN	NaN	NaN	NaN	NaN	NaN	NaN
NaN	NaN	NaN	NaN	NaN	NaN	NaN	NaN	NaN	NaN	NaN	NaN	NaN	NaN	NaN	NaN	NaN	NaN	NaN	NaN	NaN	7.5	5.1	NaN	NaN	NaN	NaN	NaN	NaN	NaN	NaN	5	NaN	NaN	NaN	NaN	NaN	NaN	NaN	NaN	NaN	NaN	NaN	NaN	NaN	NaN	NaN	NaN	NaN	NaN
NaN	NaN	NaN	NaN	NaN	NaN	NaN	NaN	NaN	NaN	NaN	NaN	NaN	NaN	NaN	NaN	NaN	NaN	NaN	NaN	NaN	9.9	NaN	NaN	NaN	NaN	NaN	NaN	NaN	NaN	NaN	NaN	NaN	NaN	NaN	NaN	NaN	NaN	NaN	NaN	NaN	NaN	NaN	NaN	NaN	NaN	NaN	NaN	NaN	NaN
NaN	NaN	NaN	NaN	NaN	5.6	NaN	NaN	NaN	NaN	NaN	NaN	NaN	NaN	NaN	NaN	NaN	NaN	NaN	4	NaN	NaN	NaN	NaN	NaN	NaN	NaN	NaN	NaN	NaN	NaN	NaN	NaN	NaN	NaN	NaN	NaN	NaN	NaN	NaN	NaN	NaN	NaN	NaN	NaN	NaN	NaN	NaN	NaN	NaN
NaN	NaN	NaN	NaN	NaN	7.2	NaN	NaN	NaN	NaN	NaN	NaN	NaN	NaN	NaN	NaN	NaN	NaN	NaN	6	NaN	NaN	NaN	NaN	NaN	NaN	NaN	NaN	NaN	NaN	NaN	NaN	NaN	NaN	NaN	NaN	NaN	NaN	NaN	NaN	NaN	NaN	NaN	NaN	NaN	NaN	NaN	NaN	NaN	NaN
NaN	NaN	NaN	NaN	NaN	6.5	NaN	NaN	NaN	NaN	NaN	NaN	NaN	NaN	NaN	NaN	NaN	NaN	NaN	NaN	NaN	5.4	NaN	NaN	NaN	NaN	NaN	NaN	NaN	NaN	NaN	NaN	NaN	NaN	NaN	NaN	NaN	NaN	NaN	NaN	NaN	NaN	NaN	NaN	NaN	NaN	NaN	NaN	NaN	NaN
NaN	NaN	NaN	NaN	NaN	6.3	NaN	NaN	NaN	NaN	NaN	NaN	NaN	NaN	NaN	NaN	NaN	NaN	NaN	NaN	NaN	NaN	NaN	NaN	NaN	NaN	NaN	NaN	NaN	NaN	NaN	NaN	NaN	NaN	NaN	NaN	NaN	NaN	NaN	NaN	NaN	NaN	NaN	NaN	NaN	NaN	NaN	NaN	NaN	NaN
NaN	NaN	NaN	NaN	NaN	NaN	NaN	NaN	NaN	NaN	NaN	NaN	NaN	NaN	NaN	NaN	NaN	NaN	NaN	NaN	NaN	7	NaN	NaN	NaN	NaN	NaN	NaN	NaN	NaN	NaN	NaN	NaN	NaN	NaN	NaN	NaN	NaN	NaN	NaN	NaN	NaN	NaN	NaN	NaN	NaN	NaN	NaN	NaN	NaN
5.6	5.4	NaN	NaN	NaN	5.3	NaN	NaN	NaN	NaN	5.2	NaN	5.6	5.4	NaN	NaN	NaN	NaN	NaN	NaN	NaN	NaN	NaN	5.8	5.4	5.4	5.8	5.6	NaN	NaN	5.5	6.3	5.6	6	NaN	NaN	NaN	NaN	NaN	5.6	NaN	5.8	5.9	NaN	NaN	NaN	NaN	NaN	NaN	NaN
5.6	5.4	NaN	NaN	NaN	5.4	NaN	NaN	NaN	NaN	5.2	NaN	5.6	5.4	NaN	NaN	NaN	NaN	NaN	NaN	NaN	NaN	NaN	6	5.4	5.4	5.8	5.5	NaN	NaN	5.8	6.4	6	5.4	NaN	NaN	NaN	NaN	NaN	5.4	NaN	5.7	5.6	NaN	NaN	NaN	NaN	NaN	NaN	NaN
6.2	NaN	5.1	5.1	5	5.8	5.7	5.8	NaN	NaN	5.9	5.3	NaN	NaN	5.1	5.3	5.6	NaN	5.1	NaN	5	5.9	5.1	5	NaN	NaN	NaN	5.1	5.8	NaN	5.7	5	5.6	5.2	5.1	5.7	5.1	5.5	5.2	5.9	5	5.2	NaN	5.1	NaN	5.7	5.5	5.8	5.4	5.8
NaN	NaN	NaN	NaN	5	NaN	NaN	NaN	NaN	NaN	NaN	NaN	NaN	NaN	NaN	NaN	NaN	NaN	5.1	NaN	5	NaN	NaN	5	NaN	NaN	NaN	5.1	NaN	NaN	5.5	5.9	NaN	NaN	NaN	NaN	NaN	NaN	NaN	NaN	5	NaN	NaN	NaN	NaN	NaN	NaN	NaN	NaN	NaN
6.3	5.4	NaN	NaN	NaN	5.6	NaN	NaN	NaN	NaN	5.9	NaN	5.6	5.3	NaN	NaN	NaN	NaN	NaN	NaN	NaN	NaN	NaN	5.5	NaN	5.4	5.8	NaN	NaN	NaN	6.1	6.8	8.3	5.4	NaN	NaN	NaN	NaN	NaN	5.7	NaN	5.7	5.6	NaN	NaN	NaN	NaN	NaN	NaN	NaN
6.2	NaN	5.3	6.3	5.3	NaN	NaN	5.8	NaN	NaN	5.9	5.9	NaN	NaN	5.3	5.6	5.6	NaN	5.3	4	5.6	5.9	5.1	5.5	NaN	NaN	NaN	5.4	7	NaN	6.7	7.3	5.6	5.2	5.5	6.3	6.5	5.7	5.2	6.3	5	5.2	NaN	5.1	NaN	5.7	5.5	NaN	5.4	5.8
NaN	NaN	5.1	5.4	5.2	NaN	NaN	NaN	NaN	NaN	NaN	NaN	NaN	NaN	5.9	6.1	5.4	NaN	5.1	NaN	5.4	NaN	5.9	5.1	NaN	NaN	NaN	5.2	5.8	NaN	5.1	6.1	5.6	5.9	5.9	5.2	5.1	5.2	5.2	6	5	5.2	NaN	5.1	NaN	NaN	5.5	NaN	5.4	NaN
NaN	NaN	5.1	5.1	5	NaN	NaN	5.8	NaN	NaN	5.9	5.4	NaN	NaN	5.2	5.3	6	NaN	5.1	NaN	5.3	5.9	5.7	5.1	NaN	NaN	NaN	5.4	5.8	NaN	5.1	6.1	5.6	6.6	5.6	5.2	5.5	5.2	5.2	5.9	5	5.2	NaN	5.1	NaN	5.7	5.9	NaN	5.4	5.8
6.2	NaN	5.1	5.1	5	NaN	NaN	5.8	NaN	NaN	5.9	5.3	NaN	NaN	5.1	5.2	5.2	NaN	5.1	NaN	5	5.9	5.3	5	NaN	NaN	NaN	5.1	5.8	NaN	5.1	6.1	5.6	5.2	5.1	5.2	5.1	5.2	5.2	5.9	5	5.7	NaN	5.1	NaN	5.7	5.5	NaN	5.4	5.8
NaN	NaN	NaN	NaN	NaN	NaN	NaN	NaN	NaN	NaN	NaN	NaN	NaN	NaN	NaN	NaN	NaN	NaN	NaN	NaN	NaN	NaN	NaN	NaN	NaN	NaN	NaN	NaN	NaN	NaN	NaN	NaN	NaN	NaN	NaN	NaN	NaN	NaN	NaN	NaN	NaN	NaN	NaN	NaN	NaN	NaN	NaN	NaN	NaN	NaN
NaN	NaN	NaN	NaN	NaN	NaN	NaN	NaN	NaN	NaN	NaN	NaN	NaN	NaN	NaN	NaN	NaN	NaN	NaN	NaN	NaN	NaN	NaN	NaN	NaN	NaN	NaN	NaN	NaN	NaN	NaN	NaN	NaN	NaN	NaN	NaN	NaN	NaN	NaN	NaN	NaN	NaN	NaN	NaN	NaN	NaN	NaN	NaN	NaN	NaN
6.2	NaN	5.1	5.1	5	5.9	5.7	5.8	NaN	NaN	5.9	5.3	NaN	NaN	5.1	5.2	5.2	NaN	5.1	NaN	5	5.9	5.1	5.3	NaN	NaN	NaN	5.1	5.8	NaN	5.1	7.1	5.6	5.2	5.1	5.2	5.1	5.2	5.2	5.9	5	5.6	NaN	5.1	5.4	5.7	5.5	5.8	5.4	5.8
6.2	NaN	5.7	5.7	5.9	5.9	5.7	5.8	NaN	NaN	5.9	5.3	NaN	NaN	5.1	5.2	5.2	NaN	6.3	NaN	7	5.9	5.9	5.2	NaN	NaN	NaN	6	6.7	NaN	6.1	7.2	5.6	5.2	5.1	5.2	5.1	5.2	5.5	5.9	5	6.1	NaN	5.2	5.4	5.7	5.5	5.8	5.4	5.8
6.2	NaN	5.3	5.1	5.4	5.9	5.7	5.8	NaN	NaN	5.9	5.3	NaN	NaN	5.1	5.2	5.2	NaN	5.1	NaN	5.1	5.9	5.1	5.1	NaN	NaN	NaN	5.1	5.8	NaN	6.1	6.7	5.6	5.2	5.3	6.3	5.4	5.5	5.5	5.9	5	5.8	NaN	5.1	NaN	5.7	5.5	5.8	5.4	5.8
NaN	NaN	NaN	5.1	NaN	NaN	NaN	NaN	NaN	NaN	NaN	NaN	NaN	NaN	NaN	NaN	NaN	NaN	NaN	NaN	NaN	NaN	NaN	NaN	NaN	NaN	NaN	NaN	NaN	NaN	NaN	NaN	NaN	NaN	NaN	NaN	NaN	NaN	NaN	NaN	5	NaN	NaN	NaN	NaN	NaN	NaN	NaN	NaN	NaN
6.2	NaN	5.1	5.1	5	NaN	NaN	5.8	NaN	NaN	NaN	NaN	NaN	NaN	NaN	NaN	NaN	NaN	5.1	NaN	7	5.9	5.1	5	NaN	NaN	NaN	5.1	7.4	5.4	NaN	NaN	5.6	NaN	5.1	NaN	NaN	NaN	5.2	5.9	NaN	7.3	NaN	NaN	NaN	5.7	5.5	5.8	5.4	NaN
NaN	NaN	NaN	NaN	NaN	NaN	NaN	NaN	NaN	NaN	NaN	NaN	NaN	NaN	NaN	NaN	NaN	NaN	NaN	NaN	NaN	6.7	NaN	NaN	NaN	NaN	NaN	NaN	NaN	NaN	NaN	NaN	NaN	NaN	NaN	NaN	NaN	NaN	NaN	NaN	NaN	NaN	NaN	NaN	NaN	NaN	NaN	NaN	NaN	NaN
NaN	NaN	NaN	NaN	NaN	NaN	NaN	NaN	NaN	NaN	NaN	NaN	NaN	NaN	NaN	NaN	NaN	NaN	NaN	NaN	NaN	7.3	NaN	NaN	NaN	NaN	NaN	NaN	NaN	NaN	NaN	NaN	NaN	NaN	NaN	NaN	NaN	NaN	NaN	NaN	NaN	NaN	NaN	NaN	NaN	NaN	NaN	NaN	NaN	NaN
NaN	NaN	NaN	NaN	NaN	NaN	NaN	NaN	NaN	NaN	NaN	NaN	NaN	NaN	NaN	NaN	NaN	NaN	NaN	NaN	NaN	6.9	NaN	NaN	NaN	NaN	NaN	NaN	NaN	NaN	NaN	NaN	NaN	NaN	NaN	NaN	NaN	NaN	NaN	NaN	NaN	NaN	NaN	NaN	NaN	NaN	NaN	NaN	NaN	NaN
NaN	NaN	NaN	NaN	NaN	5.5	NaN	NaN	NaN	NaN	NaN	NaN	NaN	NaN	NaN	NaN	NaN	NaN	NaN	NaN	NaN	NaN	NaN	NaN	NaN	5.6	NaN	5.5	NaN	NaN	NaN	5.6	NaN	NaN	NaN	NaN	NaN	NaN	NaN	NaN	NaN	NaN	5.6	NaN	NaN	NaN	NaN	NaN	NaN	NaN
NaN	NaN	5.1	5.1	5	5.9	5.7	5.8	NaN	NaN	NaN	5.3	NaN	NaN	5.1	5.2	5.2	NaN	6.2	NaN	5.9	NaN	6	5.1	NaN	NaN	NaN	6.9	5.8	NaN	5.1	5	5.6	5.2	5.1	5.2	5.1	5.2	5.2	5.9	5	5.2	NaN	5.1	5.4	6.6	5.5	6.5	5.4	5.8
NaN	NaN	NaN	NaN	NaN	NaN	NaN	NaN	NaN	NaN	NaN	NaN	NaN	NaN	NaN	NaN	NaN	NaN	NaN	NaN	NaN	NaN	NaN	NaN	NaN	NaN	NaN	NaN	NaN	NaN	NaN	NaN	NaN	NaN	NaN	NaN	NaN	NaN	NaN	NaN	NaN	NaN	NaN	NaN	NaN	NaN	NaN	NaN	NaN	NaN
6.2	NaN	5.1	5.1	5	5.9	5.7	5.8	NaN	NaN	5.9	5.9	NaN	NaN	5.7	5.6	5.8	NaN	5.9	NaN	5.2	6.5	6.1	5.6	NaN	NaN	NaN	5.1	5.8	NaN	6.4	7	5.6	5.5	6.3	7.7	5.1	5.2	5.7	5.9	5	6.8	NaN	5.1	NaN	5.7	5.5	5.8	5.4	5.9
NaN	NaN	NaN	NaN	NaN	5.2	NaN	NaN	NaN	NaN	5.2	NaN	NaN	NaN	NaN	NaN	NaN	NaN	NaN	NaN	NaN	NaN	NaN	NaN	NaN	5.9	NaN	6.3	NaN	NaN	NaN	NaN	NaN	NaN	NaN	NaN	NaN	NaN	NaN	5.3	NaN	5.8	NaN	NaN	NaN	NaN	NaN	NaN	NaN	NaN
5.8	5.4	7	6.2	6.4	5.4	5.7	5.8	NaN	NaN	5.4	5.4	5.6	5.4	5.1	5.6	5.6	NaN	NaN	NaN	6.5	6	5.4	5.2	5.4	5.4	6	5.2	5.5	6.2	5.8	7.1	5.6	5.3	5.7	5.2	5.1	5.2	5.2	5.8	5	6.6	6.6	5.1	5.4	5.7	5.5	5.8	5.4	5.8
7	5.9	5.1	5.1	NaN	6.2	6.6	7.9	NaN	NaN	5.7	5.2	5.7	5.5	5.1	6.5	6.1	6.8	5.1	NaN	5	5.9	5.1	5.4	6.6	5.4	5.8	6.8	5.8	5.4	6.1	7	7.4	5.3	5.8	5.2	5.1	NaN	5.2	5.6	5	5.6	5.6	NaN	5.4	5.7	5.5	5.8	5.4	NaN
NaN	NaN	5.1	5.1	5	NaN	NaN	NaN	NaN	NaN	NaN	5.3	NaN	NaN	5.1	5.4	5.2	NaN	5.1	NaN	5	NaN	5.1	5	NaN	NaN	NaN	5.1	NaN	NaN	5.1	5.5	NaN	5.2	5.1	5.2	5.1	5.2	5.2	NaN	5	5.6	NaN	5.1	5.4	NaN	NaN	NaN	5.4	NaN
NaN	NaN	5.1	5.1	5	NaN	NaN	5.8	NaN	NaN	5.9	5.3	NaN	NaN	5.1	5.2	5.2	NaN	5.1	NaN	5	5.9	5.1	5	NaN	NaN	NaN	5.1	5.8	NaN	5.3	6.2	6	5.3	5.4	5.2	5.1	5.2	5.8	5.9	5	5.5	NaN	5.2	NaN	5.7	5.5	NaN	5.4	5.8
NaN	NaN	NaN	NaN	NaN	NaN	NaN	NaN	NaN	NaN	NaN	NaN	NaN	NaN	NaN	NaN	NaN	NaN	NaN	4	NaN	NaN	NaN	NaN	NaN	NaN	NaN	NaN	NaN	NaN	NaN	5.2	NaN	NaN	NaN	NaN	NaN	NaN	5.5	NaN	NaN	NaN	NaN	NaN	NaN	NaN	NaN	NaN	NaN	NaN
NaN	NaN	NaN	NaN	NaN	NaN	NaN	NaN	NaN	NaN	NaN	NaN	NaN	NaN	NaN	NaN	NaN	NaN	NaN	NaN	NaN	NaN	NaN	NaN	NaN	NaN	NaN	NaN	NaN	NaN	NaN	NaN	NaN	NaN	NaN	NaN	NaN	NaN	NaN	NaN	NaN	NaN	NaN	NaN	NaN	NaN	NaN	NaN	NaN	NaN
NaN	NaN	NaN	NaN	NaN	5.5	NaN	NaN	NaN	NaN	NaN	NaN	NaN	NaN	NaN	NaN	NaN	NaN	NaN	NaN	NaN	NaN	NaN	NaN	NaN	NaN	NaN	NaN	NaN	NaN	NaN	NaN	NaN	NaN	NaN	NaN	NaN	NaN	NaN	NaN	NaN	NaN	NaN	NaN	NaN	NaN	NaN	NaN	NaN	NaN
NaN	NaN	NaN	NaN	NaN	NaN	NaN	NaN	NaN	NaN	NaN	NaN	NaN	NaN	NaN	NaN	NaN	NaN	NaN	NaN	NaN	NaN	NaN	NaN	NaN	NaN	NaN	NaN	NaN	NaN	NaN	NaN	NaN	NaN	NaN	NaN	NaN	NaN	NaN	NaN	NaN	NaN	NaN	NaN	NaN	NaN	NaN	NaN	NaN	NaN
NaN	NaN	NaN	NaN	NaN	NaN	NaN	NaN	NaN	NaN	NaN	NaN	NaN	NaN	NaN	NaN	NaN	NaN	NaN	NaN	NaN	NaN	NaN	NaN	NaN	NaN	NaN	NaN	NaN	NaN	NaN	NaN	NaN	NaN	NaN	NaN	NaN	NaN	NaN	NaN	NaN	NaN	NaN	NaN	NaN	NaN	NaN	NaN	NaN	NaN
6.2	NaN	5.1	5.1	5	NaN	6.3	5.8	NaN	NaN	5.9	5.3	NaN	NaN	5.1	5.2	5.2	NaN	5.1	NaN	5	5.9	5.1	5	NaN	NaN	NaN	5.3	7.8	NaN	5.6	6.4	5.6	5.2	5.3	5.6	6	5.5	5.2	6.5	5	6.4	NaN	5.1	5.4	5.7	5.5	5.8	5.4	5.8
6.2	NaN	5.1	5.7	5	5.9	6.6	6.5	NaN	NaN	5.9	5.3	NaN	NaN	5.1	5.2	5.2	NaN	6.4	4	5.3	5.9	5.1	5	NaN	NaN	NaN	5.1	8.5	NaN	5.1	5.5	5.6	5.2	5.1	5.2	5.1	5.3	5.2	5.9	5	5.2	NaN	5.1	NaN	5.7	5.5	5.8	5.4	5.8
5.7	6.3	NaN	NaN	NaN	5	NaN	NaN	NaN	NaN	4.3	NaN	4	4.4	NaN	NaN	NaN	NaN	NaN	4	NaN	NaN	NaN	5.9	4.5	NaN	5.4	NaN	NaN	NaN	NaN	6.7	5.6	5.1	NaN	NaN	NaN	NaN	NaN	4.8	NaN	4.1	4.2	NaN	NaN	NaN	NaN	NaN	NaN	NaN
4.7	4	4.3	4.3	4.3	4.3	NaN	NaN	NaN	NaN	NaN	NaN	4	NaN	NaN	NaN	NaN	NaN	NaN	NaN	NaN	NaN	NaN	5.3	NaN	NaN	4.2	NaN	NaN	NaN	NaN	4.3	4.4	NaN	NaN	NaN	NaN	NaN	NaN	NaN	NaN	4.4	NaN	NaN	NaN	NaN	NaN	NaN	NaN	NaN
6.2	NaN	5.7	5.8	5.5	5.9	5.7	5.8	NaN	NaN	5.9	5.8	NaN	NaN	5.1	6	5.6	NaN	7.1	5.5	5	5.9	6.3	7.6	5.8	5.5	NaN	7.2	6.3	NaN	5.3	5.6	5.6	5.2	5.2	5.7	5.3	5.5	5.2	6.6	5	5.3	NaN	5.1	NaN	6.3	5.5	5.9	NaN	5.9
NaN	NaN	NaN	NaN	NaN	NaN	NaN	NaN	NaN	NaN	NaN	NaN	NaN	NaN	NaN	NaN	NaN	NaN	5.4	NaN	5.2	NaN	5.7	5.3	NaN	NaN	NaN	NaN	NaN	NaN	NaN	NaN	NaN	NaN	NaN	NaN	NaN	NaN	NaN	NaN	NaN	NaN	NaN	NaN	NaN	NaN	NaN	NaN	NaN	NaN
NaN	NaN	NaN	NaN	NaN	NaN	NaN	NaN	NaN	NaN	NaN	NaN	NaN	NaN	NaN	NaN	NaN	NaN	5.1	NaN	NaN	NaN	5.2	NaN	NaN	NaN	NaN	NaN	NaN	NaN	NaN	NaN	NaN	NaN	NaN	NaN	NaN	NaN	NaN	NaN	NaN	NaN	NaN	NaN	NaN	NaN	NaN	NaN	NaN	NaN
NaN	NaN	5.1	5.1	5	NaN	NaN	NaN	NaN	NaN	NaN	NaN	NaN	NaN	5.1	NaN	NaN	NaN	5.1	NaN	5.3	NaN	5.1	5	NaN	NaN	NaN	5.1	NaN	NaN	5.1	5	NaN	NaN	5.1	NaN	NaN	NaN	NaN	NaN	5	NaN	NaN	NaN	NaN	NaN	NaN	NaN	NaN	6
NaN	NaN	NaN	NaN	NaN	NaN	NaN	NaN	NaN	NaN	NaN	NaN	NaN	NaN	NaN	NaN	NaN	NaN	NaN	NaN	NaN	6.9	6.3	NaN	NaN	NaN	NaN	NaN	NaN	NaN	NaN	7.2	NaN	NaN	NaN	NaN	NaN	NaN	NaN	NaN	NaN	NaN	NaN	NaN	NaN	NaN	NaN	NaN	NaN	NaN
NaN	NaN	NaN	NaN	NaN	NaN	NaN	NaN	NaN	NaN	NaN	NaN	NaN	NaN	NaN	NaN	NaN	NaN	NaN	NaN	NaN	8.4	6.4	NaN	NaN	NaN	NaN	NaN	NaN	NaN	NaN	7.6	NaN	NaN	NaN	NaN	NaN	NaN	NaN	NaN	NaN	NaN	NaN	NaN	NaN	NaN	NaN	NaN	NaN	NaN
NaN	NaN	NaN	NaN	NaN	NaN	NaN	NaN	NaN	NaN	NaN	NaN	NaN	NaN	NaN	NaN	NaN	NaN	NaN	NaN	NaN	7.7	6.3	NaN	NaN	NaN	NaN	NaN	NaN	NaN	NaN	7.2	NaN	NaN	NaN	NaN	NaN	NaN	NaN	NaN	NaN	NaN	NaN	NaN	NaN	NaN	NaN	NaN	NaN	NaN
5.8	5.4	5.1	5.1	5	5.4	NaN	5.8	NaN	NaN	5.4	5.3	5.6	5.4	5.1	5.2	5.2	5.6	5.1	NaN	5	5.9	5.4	5.2	5.4	5.5	6	5.2	5.8	NaN	5.3	5.2	5.6	5.3	5.1	5.2	5.1	5.2	5.2	5.5	5	5.5	5.6	5.1	NaN	5.7	5.5	5.8	5.4	NaN
NaN	NaN	5.1	5.1	5	NaN	NaN	NaN	NaN	NaN	NaN	NaN	NaN	NaN	5.1	NaN	NaN	NaN	5.1	NaN	5	NaN	5.1	5.1	NaN	NaN	NaN	5.1	NaN	NaN	5.1	5	5.9	NaN	5.1	NaN	5.1	NaN	NaN	NaN	5	NaN	NaN	5.1	NaN	NaN	NaN	NaN	NaN	NaN
6.2	NaN	5.1	5.1	5	NaN	NaN	5.8	NaN	NaN	NaN	5.1	NaN	NaN	NaN	NaN	NaN	NaN	5.1	NaN	5	NaN	5.1	5	NaN	NaN	NaN	7.7	5	5.4	NaN	NaN	5.6	NaN	5.1	NaN	NaN	NaN	5.2	5.9	NaN	5.2	NaN	NaN	NaN	5.9	5.5	5.8	5.4	NaN
NaN	NaN	NaN	NaN	NaN	NaN	NaN	NaN	NaN	NaN	NaN	NaN	NaN	NaN	NaN	NaN	NaN	NaN	NaN	NaN	NaN	NaN	NaN	NaN	NaN	NaN	NaN	NaN	NaN	NaN	NaN	NaN	NaN	NaN	NaN	NaN	NaN	NaN	NaN	NaN	NaN	NaN	NaN	NaN	NaN	NaN	NaN	NaN	NaN	NaN
NaN	NaN	NaN	NaN	NaN	NaN	NaN	NaN	NaN	NaN	NaN	NaN	NaN	NaN	NaN	NaN	NaN	NaN	NaN	NaN	NaN	NaN	NaN	NaN	NaN	NaN	NaN	NaN	NaN	NaN	NaN	NaN	NaN	NaN	NaN	NaN	NaN	NaN	NaN	NaN	NaN	NaN	NaN	NaN	NaN	NaN	NaN	NaN	NaN	NaN
6.2	NaN	5.4	5.5	5.3	5.9	5.7	5.8	NaN	NaN	5.9	5.3	NaN	NaN	5.1	5.2	5.2	NaN	5.1	NaN	7.2	6.3	5.1	5	NaN	NaN	NaN	6	6.1	NaN	5.1	5	5.6	5.2	5.1	5.2	5.1	6.9	5.2	7.2	5	5.3	NaN	5.1	5.4	5.7	5.5	5.8	5.4	5.8
NaN	NaN	NaN	NaN	NaN	6	NaN	NaN	NaN	NaN	NaN	NaN	NaN	NaN	NaN	NaN	NaN	NaN	NaN	NaN	NaN	NaN	NaN	NaN	NaN	NaN	NaN	NaN	NaN	NaN	NaN	NaN	NaN	NaN	NaN	NaN	NaN	NaN	NaN	NaN	NaN	NaN	NaN	NaN	NaN	NaN	NaN	NaN	NaN	NaN
NaN	NaN	5.1	5.1	5	NaN	NaN	NaN	NaN	NaN	NaN	5.1	NaN	NaN	NaN	NaN	NaN	NaN	5.1	NaN	5.5	NaN	5.1	5	NaN	NaN	NaN	5.1	5	NaN	NaN	NaN	NaN	NaN	5.1	NaN	NaN	NaN	5.2	NaN	NaN	5.2	NaN	NaN	NaN	NaN	NaN	NaN	NaN	NaN
NaN	NaN	NaN	NaN	NaN	NaN	NaN	NaN	NaN	NaN	NaN	NaN	NaN	NaN	NaN	NaN	NaN	NaN	NaN	4	NaN	6.4	NaN	NaN	NaN	NaN	NaN	NaN	NaN	NaN	NaN	NaN	NaN	NaN	NaN	NaN	NaN	NaN	NaN	NaN	NaN	NaN	NaN	NaN	NaN	NaN	NaN	NaN	NaN	NaN
4.6	5.4	NaN	NaN	NaN	4.9	NaN	NaN	NaN	NaN	NaN	NaN	4.8	4.9	NaN	NaN	NaN	NaN	NaN	NaN	NaN	NaN	NaN	6.9	5.1	7.6	6.1	4.2	NaN	NaN	7.2	8.7	4.5	5.1	NaN	NaN	NaN	NaN	NaN	5.7	NaN	7.4	7.9	NaN	NaN	NaN	NaN	NaN	NaN	NaN
6.2	NaN	5.1	5.1	5	NaN	5.7	5.8	NaN	NaN	5.9	5.2	NaN	NaN	5.1	5.2	5.2	NaN	6.3	NaN	5	5.9	6.9	6.8	NaN	5.9	NaN	5.1	5.8	NaN	7	8.5	5.6	5.2	5.1	5.2	5.1	5.2	5.2	5.9	5	7.6	NaN	5.5	5.4	5.7	5.5	5.8	5.4	5.8
6.2	NaN	5.1	5.1	5	5.9	5.7	5.8	NaN	NaN	5.9	5.3	NaN	NaN	5.3	5.2	5.3	NaN	5.3	4	5	5.9	6.1	5.8	NaN	NaN	NaN	5.1	5.8	NaN	6.8	8	5.6	5.2	5.1	5.2	5.4	5.2	5.8	5.9	5	7.1	NaN	5.1	5.4	5.7	5.5	5.8	5.4	5.8
6.2	NaN	5.1	5.1	5	5.9	NaN	5.8	NaN	NaN	5.9	5.2	NaN	NaN	5.5	5.3	5.3	NaN	6.1	NaN	7.6	5.9	7.3	6	NaN	NaN	NaN	5.1	5.8	NaN	5.5	7.5	5.6	5.2	5.1	5.2	5.1	5.2	5.2	5.9	5	5.2	NaN	5.1	NaN	5.7	5.5	5.8	5.4	5.8
6.6	6.4	5.1	5.1	5	7	NaN	7	NaN	NaN	6.4	6	6.3	5.5	5.3	6.7	6.6	NaN	7.4	NaN	5.7	6.5	7.8	7.9	7	5.4	6.5	7.8	7.3	NaN	6.2	6.7	7.2	5.4	5.5	5.4	5.9	5.2	5.8	6.6	5.6	6.2	6.4	5.1	NaN	5.7	6	5.8	5.6	8.5
6.2	NaN	5.1	5.1	5	5.9	7.4	5.9	NaN	NaN	5.9	5.3	NaN	NaN	5.2	5.2	5.2	NaN	5.1	NaN	5	5.9	5.1	5	NaN	NaN	NaN	5.1	5.8	NaN	5.1	5	NaN	5.2	5.1	5.2	5.1	5.2	5.2	5.9	5	5.2	NaN	5.1	5.4	5.7	7.7	5.8	5.4	5.8
6.2	NaN	6.8	6.7	6.8	NaN	NaN	5.8	NaN	NaN	NaN	5.8	NaN	NaN	NaN	NaN	NaN	NaN	6.8	NaN	6.7	NaN	6.9	6.5	NaN	NaN	NaN	6.8	6.4	6.3	NaN	NaN	5.6	NaN	5.7	NaN	NaN	NaN	5.2	7.4	NaN	5.2	NaN	NaN	NaN	5.7	5.5	5.8	5.4	NaN
6.2	NaN	5.1	5.1	5	5.9	5.7	5.8	NaN	NaN	5.9	5.3	NaN	NaN	5.1	5.2	5.2	NaN	5.1	NaN	5	5.9	5.1	5	NaN	NaN	NaN	5.1	5.8	NaN	5.3	5.6	5.6	5.2	5.1	5.2	5.1	5.2	5.2	5.9	5	5.9	NaN	5.1	NaN	5.7	5.5	5.8	5.4	5.8
6.2	NaN	5.1	5.1	5	5.9	5.7	5.8	NaN	NaN	5.9	5.3	NaN	NaN	5.1	5.2	5.2	NaN	5.1	NaN	5	5.9	5.1	5	NaN	NaN	NaN	5.1	5.8	NaN	5.1	6.3	5.6	5.2	5.1	7.7	5.1	5.2	6	5.9	5	6.1	NaN	5.1	NaN	5.7	5.5	5.8	5.4	5.8
NaN	NaN	5.1	5.1	5	5.9	5.7	5.9	NaN	NaN	5.9	5.9	NaN	NaN	6	5.5	5.6	NaN	6	4	5	6.2	5.7	5.4	NaN	NaN	NaN	5.1	5.8	NaN	6.2	7	5.6	5.2	5.9	5.2	5.1	5.2	5.6	5.9	5	6.7	NaN	5.1	5.4	5.7	5.5	5.8	5.4	5.8
NaN	NaN	NaN	NaN	NaN	NaN	NaN	NaN	NaN	NaN	NaN	NaN	NaN	NaN	NaN	NaN	NaN	NaN	NaN	NaN	NaN	NaN	NaN	NaN	NaN	NaN	NaN	NaN	NaN	NaN	NaN	NaN	NaN	NaN	NaN	NaN	NaN	NaN	NaN	NaN	NaN	NaN	NaN	NaN	NaN	NaN	NaN	NaN	NaN	NaN
6.2	NaN	7.7	6.9	6.4	5.9	5.7	5.8	NaN	NaN	5.9	5.1	NaN	NaN	5.1	5.2	5.3	NaN	5.1	4	5.4	6.4	5.1	5.3	NaN	NaN	NaN	5.1	5.3	6.2	7.6	8.5	5.6	5.2	5.5	5.5	5.8	5.2	5.2	5.9	5	7.4	NaN	5.4	5.4	5.7	5.5	5.8	5.4	5.8
6.2	NaN	5.6	5.1	5.1	5.9	5.7	5.8	NaN	NaN	5.9	5.3	NaN	NaN	5.1	5.5	5.2	NaN	5.1	NaN	5.6	6	5.1	5	NaN	NaN	NaN	5.1	5.8	NaN	6.3	7.8	5.6	5.2	5.1	5.2	5.1	5.2	5.2	5.9	5	5.7	NaN	5.1	5.4	5.7	5.5	5.8	5.4	5.8
6.2	NaN	6.9	5.8	6.7	NaN	NaN	5.8	NaN	NaN	NaN	5.2	NaN	NaN	NaN	NaN	NaN	NaN	5.6	NaN	5.8	NaN	5.4	5.6	NaN	NaN	NaN	5.1	5.8	5.8	NaN	NaN	5.6	NaN	6.3	NaN	NaN	NaN	5.2	5.9	NaN	7.5	NaN	NaN	NaN	5.7	5.5	5.8	5.4	NaN
6.2	NaN	7.2	6.1	6.1	NaN	NaN	5.8	NaN	NaN	NaN	5.1	NaN	NaN	NaN	NaN	NaN	NaN	NaN	NaN	5.4	NaN	5.1	5	NaN	NaN	NaN	5.1	5	5.4	NaN	NaN	5.6	NaN	5.1	NaN	NaN	NaN	5.2	5.9	NaN	6.4	NaN	NaN	NaN	5.7	5.5	5.8	5.4	NaN
6.2	NaN	NaN	NaN	8.3	5.9	8	6.7	NaN	NaN	6.3	5.9	NaN	NaN	6.6	7.8	7.6	NaN	6.6	4	6.5	6.6	6.9	6.7	NaN	NaN	NaN	6.4	7.3	6.4	NaN	NaN	5.6	6.3	6.4	5.9	6.1	5.9	5.2	7.7	6	8.6	NaN	6.4	5.9	6.6	5.5	6	5.4	6.4
NaN	NaN	NaN	NaN	NaN	NaN	NaN	NaN	NaN	NaN	NaN	NaN	NaN	NaN	NaN	NaN	NaN	NaN	NaN	NaN	NaN	7.9	6.7	NaN	NaN	NaN	NaN	NaN	NaN	NaN	NaN	8.5	NaN	NaN	NaN	NaN	NaN	NaN	NaN	NaN	NaN	NaN	NaN	NaN	NaN	NaN	NaN	NaN	NaN	NaN
NaN	NaN	NaN	NaN	NaN	NaN	NaN	NaN	NaN	NaN	NaN	NaN	NaN	NaN	NaN	NaN	NaN	NaN	NaN	NaN	NaN	NaN	NaN	NaN	NaN	NaN	NaN	NaN	NaN	NaN	NaN	6	NaN	NaN	NaN	NaN	NaN	NaN	5.5	NaN	NaN	NaN	NaN	NaN	NaN	NaN	NaN	NaN	NaN	NaN
6.2	NaN	5.1	5.1	5	5.9	5.7	5.8	NaN	NaN	5.9	5.3	NaN	NaN	5.1	5.2	5.2	NaN	5.1	NaN	5	5.9	5.3	5	NaN	NaN	NaN	5.1	5.8	NaN	5.1	5.4	5.6	5.4	7.8	5.2	5.1	5.2	5.2	5.9	5	5.2	NaN	5.1	5.4	NaN	5.5	NaN	5.4	5.8
6.2	NaN	5.1	5.1	5	5.9	5.7	5.8	NaN	NaN	5.9	5.3	NaN	NaN	5.1	5.2	5.2	NaN	5.1	NaN	5	5.9	5.1	5	NaN	NaN	NaN	5.1	5.8	NaN	6.3	6.7	5.6	6.2	7.8	5.2	5.3	5.7	5.2	5.9	5	5.2	NaN	5.1	5.4	NaN	5.5	NaN	5.4	5.8
6.2	NaN	5.1	5.1	5	5.9	5.7	5.8	NaN	NaN	5.9	5.2	NaN	NaN	5.1	5.2	5.2	NaN	5.1	NaN	5	5.9	5.1	5	NaN	NaN	NaN	5.1	5.4	5.4	5.1	5.5	5.6	5.9	7.8	5.3	5.6	5.4	5.2	5.9	5	5.2	NaN	5.1	5.4	5.7	5.3	5.8	5.4	5.8
6.2	NaN	5.1	5.1	5	5.9	5.7	5.8	NaN	NaN	5.9	5.3	NaN	NaN	5.1	5.2	5.2	NaN	5.1	NaN	5	5.9	5.1	5	NaN	NaN	NaN	5.1	5.8	NaN	5.1	5.8	5.6	6.8	8.1	5.3	6.2	6	5.2	5.9	5	5.2	NaN	5.1	5.4	NaN	5.5	NaN	5.4	5.8
6.2	NaN	5.1	5.1	5	NaN	5.7	5.8	NaN	NaN	5.9	5.3	NaN	NaN	5.1	5.2	5.2	NaN	5.1	NaN	5	5.9	5.1	5	NaN	NaN	NaN	5.1	5.8	NaN	5.1	5	5.6	6	8	5.4	5.6	5.4	5.2	5.9	5	5.2	NaN	5.1	5.4	NaN	5.5	NaN	5.4	5.8
6.2	NaN	5.1	5.1	5	NaN	5.7	5.8	NaN	NaN	5.9	5.3	NaN	NaN	5.1	5.2	5.2	NaN	5.1	4	5	5.9	5.1	5	NaN	NaN	NaN	5.1	5.8	NaN	5.1	5	5.6	6.1	7.7	5.5	5.7	5.6	5.2	5.9	5	5.2	NaN	5.1	5.4	NaN	5.5	NaN	5.4	5.8
6.2	NaN	5.1	5.1	5	NaN	5.7	5.8	NaN	NaN	5.9	5.3	NaN	NaN	5.1	5.2	5.2	NaN	5.1	NaN	5	5.9	5.1	5	NaN	NaN	NaN	5.1	5.8	NaN	5.1	5	5.6	6.3	7.9	5.6	5.8	5.5	5.2	5.9	5	5.2	NaN	5.1	5.4	NaN	5.5	NaN	5.4	5.8
6.2	NaN	5.1	5.1	5	NaN	5.7	5.8	NaN	NaN	5.9	5.3	NaN	NaN	5.1	5.2	5.2	NaN	5.1	NaN	5	5.9	5.1	5	NaN	NaN	NaN	5.1	5.8	NaN	5.1	5	5.6	6.7	8.1	6.1	6.1	5.9	5.2	5.9	5	5.2	NaN	5.1	5.4	NaN	5.5	NaN	5.4	5.8
6.2	NaN	5.1	5.1	5	NaN	5.7	5.8	NaN	NaN	5.9	5.4	NaN	NaN	5.1	5.2	5.2	NaN	5.1	NaN	5	5.9	5.1	5	NaN	NaN	NaN	5.1	5.8	NaN	5.1	5	5.6	6	8	5.7	5.7	5.5	5.2	5.9	5	5.2	NaN	5.1	5.4	NaN	5.5	NaN	5.4	5.8
6.2	NaN	5.1	5.1	5	NaN	5.7	5.8	NaN	NaN	5.9	5.3	NaN	NaN	5.1	5.2	5.2	NaN	5.1	NaN	5	5.9	5.1	5	NaN	NaN	NaN	5.1	5.8	NaN	5.1	5	5.6	6.1	7.7	5.6	5.8	5.4	5.2	5.9	5	5.2	NaN	5.1	5.4	NaN	5.5	NaN	5.4	5.8
6.2	NaN	5.1	5.1	5	NaN	5.7	5.8	NaN	NaN	5.9	5.3	NaN	NaN	5.1	5.2	5.2	NaN	5.1	NaN	5	5.9	5.1	5	NaN	NaN	NaN	5.1	5.8	NaN	5.1	5	5.6	5.7	7.5	5.2	5.2	5.2	5.2	5.9	5	5.2	NaN	5.1	5.4	NaN	5.5	NaN	5.4	5.8
6.2	NaN	5.1	5.1	5	NaN	5.7	5.8	NaN	NaN	5.9	5.3	NaN	NaN	5.1	5.2	5.2	NaN	5.1	NaN	5	5.9	5.1	5	NaN	NaN	NaN	5.1	5.8	NaN	5.1	5	5.6	6.3	7.8	5.2	5.5	5.3	5.2	5.9	5	5.2	NaN	5.1	5.4	NaN	5.5	NaN	5.4	5.8
NaN	NaN	5.1	5.1	5	5.9	5.7	5.8	NaN	NaN	5.9	5.3	NaN	NaN	5.1	5.2	5.2	NaN	5.1	NaN	5	5.9	5.1	5	NaN	NaN	NaN	5.1	5.8	NaN	5.1	5	5.6	5.3	6.9	5.2	5.1	5.2	5.2	5.9	5	5.2	NaN	5.1	5.4	NaN	5.5	5.8	5.4	5.8
5.8	5.4	5.1	5.1	5	5.2	NaN	5.8	NaN	NaN	5.2	NaN	5.6	5.4	NaN	NaN	NaN	NaN	5.1	NaN	5	NaN	5.1	5.2	5.4	5.4	5.8	5.2	5	5.4	5.4	5.6	5.6	6.7	7.8	NaN	NaN	NaN	5.2	5.6	NaN	5.7	5.6	NaN	NaN	5.7	5.5	5.8	5.4	NaN
5.8	5.4	5.1	5.1	5	5.2	NaN	5.8	NaN	NaN	5.2	NaN	5.6	5.4	NaN	NaN	NaN	NaN	5.1	NaN	5	NaN	5.1	5.2	5.4	5.4	5.8	5.2	5	5.4	5.4	5.6	5.6	6.5	7.5	NaN	NaN	NaN	5.2	5.6	NaN	5.4	5.6	NaN	NaN	5.7	5.5	5.8	5.4	NaN
NaN	NaN	5.1	5.1	5	NaN	NaN	NaN	NaN	NaN	NaN	5.3	NaN	NaN	5.1	5.2	5.2	NaN	5.1	NaN	5	NaN	5.1	5	NaN	NaN	NaN	5.1	NaN	NaN	5.1	5	5.6	5.2	6.6	5.2	5.1	5.2	5.2	NaN	5	5.2	NaN	5.1	5.4	NaN	5.5	NaN	5.4	NaN
6.4	NaN	5.1	5.1	5	NaN	8.1	7.8	NaN	NaN	7.4	7.1	NaN	NaN	5.1	5.4	5.2	NaN	6.4	NaN	6	5.9	5.1	5.3	NaN	NaN	NaN	5.1	5.8	NaN	5.1	5.1	7.2	5.2	6.7	NaN	5.1	NaN	5.2	7.2	5	5.2	NaN	5.1	5.4	6.7	7.5	5.8	6.1	7.1
6.3	NaN	5.1	5.1	5	NaN	NaN	7.3	NaN	NaN	NaN	6.4	NaN	NaN	NaN	NaN	NaN	NaN	5.9	NaN	5	NaN	5.1	5.6	NaN	NaN	NaN	5.1	5.1	5.4	NaN	NaN	7	NaN	6.7	NaN	NaN	NaN	5.2	7.1	NaN	5.2	NaN	NaN	NaN	6.3	7	5.8	5.4	NaN
5.8	5.4	5.1	5.1	5	5.6	5.7	6.1	NaN	NaN	5.4	5.3	5.6	5.4	5.1	5.2	5.2	NaN	5.4	4	5	5.9	5.3	5.5	5.5	6.3	5.8	5.2	6.2	NaN	5.6	6.2	5.6	5.3	5.3	5.2	5.6	5.2	5.9	5.7	5.7	5.7	6.1	5.1	5.4	5.7	5.5	5.8	5.4	6.9
6.2	NaN	5.1	5.1	5	5.9	6.3	6.5	NaN	NaN	5.9	5.6	NaN	NaN	5.1	5.2	5.2	NaN	5.7	NaN	5	5.9	6	5.6	NaN	NaN	NaN	5.1	5.8	NaN	7.1	7.8	5.6	6.8	7	5.2	5.5	5.2	5.2	5.9	5	6.6	NaN	5.1	5.4	5.7	6	5.8	5.4	6
NaN	NaN	NaN	NaN	NaN	NaN	NaN	NaN	NaN	NaN	NaN	NaN	NaN	NaN	NaN	NaN	NaN	NaN	NaN	NaN	NaN	NaN	NaN	NaN	NaN	NaN	NaN	NaN	NaN	NaN	NaN	NaN	NaN	NaN	NaN	NaN	NaN	NaN	NaN	NaN	NaN	NaN	NaN	NaN	NaN	NaN	NaN	NaN	NaN	NaN
NaN	NaN	NaN	NaN	NaN	NaN	NaN	NaN	NaN	NaN	NaN	NaN	NaN	NaN	NaN	NaN	NaN	NaN	NaN	NaN	NaN	NaN	NaN	NaN	NaN	NaN	NaN	NaN	NaN	NaN	NaN	NaN	NaN	NaN	NaN	NaN	NaN	NaN	NaN	NaN	NaN	NaN	NaN	NaN	NaN	NaN	NaN	NaN	NaN	NaN
NaN	NaN	NaN	NaN	NaN	NaN	NaN	NaN	NaN	NaN	NaN	NaN	NaN	NaN	NaN	NaN	NaN	NaN	NaN	NaN	NaN	NaN	NaN	NaN	NaN	NaN	NaN	NaN	NaN	NaN	NaN	NaN	NaN	NaN	NaN	NaN	NaN	NaN	NaN	NaN	NaN	NaN	NaN	NaN	NaN	NaN	NaN	NaN	NaN	NaN
NaN	NaN	5.1	5.1	5	5.9	6.2	9.1	NaN	NaN	8	5.3	NaN	NaN	5.1	5.2	5.2	NaN	5.1	NaN	5.4	5.9	5.1	5	NaN	NaN	NaN	5.1	5.8	NaN	5.1	5.6	7.3	5.2	5.8	5.2	5.1	5.2	5.2	5.9	5	5.2	NaN	5.1	5.4	6.7	8.5	5.9	5.8	6
6.2	NaN	5.1	5.1	5	5.9	NaN	5.8	NaN	NaN	5.9	5.3	NaN	NaN	5.3	5.2	5.2	NaN	6.2	NaN	5.5	8.6	6.6	6.1	6.2	NaN	7.3	5.1	5.8	NaN	6.3	7.7	5.6	6.2	6.3	5.4	5.5	5.6	5.4	5.9	5	7.4	NaN	5.3	NaN	5.7	5.5	5.8	5.4	5.8
NaN	NaN	NaN	NaN	NaN	NaN	NaN	NaN	NaN	NaN	NaN	NaN	NaN	NaN	NaN	NaN	NaN	NaN	NaN	NaN	NaN	7.8	5.1	NaN	NaN	NaN	NaN	NaN	NaN	NaN	NaN	7.5	NaN	NaN	NaN	NaN	NaN	NaN	NaN	NaN	NaN	NaN	NaN	NaN	NaN	NaN	NaN	NaN	NaN	NaN
NaN	NaN	NaN	NaN	NaN	NaN	NaN	NaN	NaN	NaN	NaN	NaN	NaN	NaN	NaN	NaN	NaN	NaN	NaN	NaN	NaN	8.3	5.1	NaN	NaN	NaN	NaN	NaN	NaN	NaN	NaN	7.6	NaN	NaN	NaN	NaN	NaN	NaN	NaN	NaN	NaN	NaN	NaN	NaN	NaN	NaN	NaN	NaN	NaN	NaN
6.3	6.7	NaN	NaN	NaN	5.2	NaN	NaN	NaN	NaN	5.2	NaN	5.6	6	NaN	NaN	NaN	NaN	NaN	NaN	NaN	NaN	NaN	6.3	5.4	5.4	7.5	5.5	NaN	NaN	5.4	6.3	5.6	5.4	NaN	NaN	NaN	NaN	NaN	5.3	NaN	5.7	6.1	NaN	NaN	NaN	NaN	NaN	NaN	NaN
NaN	NaN	NaN	NaN	NaN	NaN	NaN	NaN	NaN	NaN	NaN	NaN	NaN	NaN	NaN	NaN	NaN	NaN	NaN	NaN	NaN	NaN	NaN	NaN	NaN	NaN	NaN	NaN	NaN	NaN	NaN	4.1	NaN	NaN	NaN	NaN	NaN	NaN	NaN	NaN	NaN	NaN	NaN	NaN	NaN	NaN	NaN	NaN	NaN	NaN
NaN	NaN	NaN	NaN	NaN	NaN	NaN	NaN	NaN	NaN	NaN	NaN	NaN	NaN	NaN	NaN	NaN	NaN	NaN	NaN	NaN	5.7	NaN	NaN	NaN	NaN	NaN	NaN	NaN	NaN	NaN	NaN	NaN	NaN	NaN	NaN	NaN	NaN	NaN	NaN	NaN	NaN	NaN	NaN	NaN	NaN	NaN	NaN	NaN	NaN
6.2	NaN	5.4	5.1	5	5.9	5.7	5.8	NaN	NaN	NaN	5.2	NaN	NaN	NaN	NaN	NaN	NaN	5.1	NaN	5	5.9	5.2	5	NaN	NaN	NaN	8.5	5.6	5.4	5.1	5	5.6	5.2	5.1	NaN	5.1	NaN	5.2	5.9	5	5.2	NaN	NaN	5.4	5.7	5.5	5.8	5.4	NaN
6.2	NaN	5.1	5.1	5	NaN	6.8	6.6	NaN	NaN	NaN	5.3	NaN	NaN	5.6	5.9	5.5	NaN	5.1	NaN	5.2	5.9	5.4	5	NaN	NaN	NaN	5.2	5.7	5.4	5.4	5.5	8.5	5.2	5.1	5.2	5.1	NaN	5.2	5.9	5	5.2	NaN	NaN	5.4	5.7	5.5	5.8	5.4	NaN
5.6	5.4	NaN	NaN	NaN	5.2	NaN	NaN	NaN	NaN	5.2	NaN	5.6	5.4	NaN	NaN	NaN	NaN	NaN	NaN	NaN	NaN	NaN	6.4	5.4	5.4	5.8	5.5	NaN	NaN	5.4	6.3	5.6	5.4	NaN	NaN	NaN	NaN	NaN	5.3	NaN	5.7	5.6	NaN	NaN	NaN	NaN	NaN	NaN	NaN
6.2	NaN	5.1	5.1	5	NaN	NaN	5.8	NaN	NaN	NaN	5.1	NaN	NaN	NaN	NaN	NaN	NaN	5.1	NaN	5	NaN	5.1	5	NaN	NaN	NaN	7.4	6.1	5.4	NaN	NaN	5.6	NaN	5.1	NaN	NaN	NaN	5.2	5.9	NaN	5.2	NaN	NaN	NaN	5.7	5.5	5.8	5.4	NaN
6.2	NaN	5.1	5.1	5	NaN	NaN	5.8	NaN	NaN	NaN	5.1	NaN	NaN	NaN	NaN	NaN	NaN	5.1	NaN	5	NaN	5.1	5	NaN	NaN	NaN	NaN	6.1	5.4	NaN	NaN	6.4	NaN	5.1	NaN	NaN	NaN	5.2	5.9	NaN	5.2	NaN	NaN	NaN	5.7	5.1	5.8	5.4	NaN
8	NaN	5.1	5.1	5	6.4	NaN	6	NaN	NaN	5.9	5.3	NaN	NaN	5.1	5.2	5.2	NaN	5.7	NaN	5	5.9	5.1	5	NaN	NaN	NaN	5.1	5.8	NaN	6.2	8	6.4	5.7	7.1	7.5	7.6	7.4	7.2	5.9	5	7.3	NaN	5.1	NaN	6.6	5.5	6.4	6	6.7
5.6	5.4	NaN	NaN	NaN	5.3	NaN	NaN	NaN	NaN	5.2	NaN	5.6	5.4	NaN	NaN	NaN	NaN	NaN	NaN	NaN	NaN	NaN	5.6	5.4	6.8	6.3	5.5	NaN	NaN	5.7	6.7	5.6	6.5	NaN	NaN	NaN	NaN	NaN	5.3	NaN	5.7	6.4	NaN	NaN	NaN	NaN	NaN	NaN	NaN
5.6	5.4	NaN	NaN	NaN	5.4	NaN	NaN	NaN	NaN	5.2	NaN	5.6	5.4	NaN	NaN	NaN	NaN	NaN	NaN	NaN	NaN	NaN	5.5	5.4	5.5	5.8	5.5	NaN	NaN	5.4	5.9	5.6	5.4	NaN	NaN	NaN	NaN	NaN	5.3	NaN	5.7	5.7	NaN	NaN	NaN	NaN	NaN	NaN	NaN
5.6	5.4	NaN	NaN	NaN	5.2	NaN	NaN	NaN	NaN	5.2	NaN	5.6	5.4	NaN	NaN	NaN	NaN	NaN	NaN	NaN	NaN	NaN	6.9	5.4	5.4	7	5.5	NaN	NaN	5.5	6.5	5.6	5.4	NaN	NaN	NaN	NaN	NaN	5.3	NaN	5.8	6.4	NaN	NaN	NaN	NaN	NaN	NaN	NaN
5.8	5.7	NaN	NaN	NaN	5.5	NaN	NaN	NaN	NaN	5.2	NaN	5.6	5.5	NaN	NaN	NaN	NaN	NaN	NaN	NaN	NaN	NaN	NaN	5.8	6	5.8	NaN	NaN	NaN	5.5	NaN	5.6	5.4	NaN	NaN	NaN	NaN	NaN	5.3	NaN	5.7	6.1	NaN	NaN	NaN	NaN	NaN	NaN	NaN
NaN	NaN	NaN	NaN	NaN	NaN	NaN	NaN	NaN	NaN	NaN	NaN	NaN	NaN	NaN	NaN	NaN	NaN	NaN	NaN	NaN	NaN	NaN	5.8	NaN	5.7	NaN	NaN	NaN	NaN	NaN	NaN	NaN	5.4	NaN	NaN	NaN	NaN	NaN	NaN	NaN	NaN	NaN	NaN	NaN	NaN	NaN	NaN	NaN	NaN
NaN	5.4	NaN	NaN	NaN	5.2	NaN	NaN	NaN	NaN	5.2	NaN	NaN	5.1	NaN	NaN	NaN	NaN	NaN	NaN	NaN	NaN	NaN	5.5	5.7	5.8	NaN	NaN	NaN	NaN	5.4	NaN	NaN	5.4	NaN	NaN	NaN	NaN	NaN	5.3	NaN	NaN	NaN	NaN	NaN	NaN	NaN	NaN	NaN	NaN
NaN	NaN	NaN	NaN	NaN	5.2	NaN	NaN	NaN	NaN	5.2	NaN	NaN	5.1	NaN	NaN	NaN	NaN	NaN	NaN	NaN	NaN	NaN	NaN	5.4	NaN	NaN	NaN	NaN	NaN	NaN	NaN	NaN	NaN	NaN	NaN	NaN	NaN	NaN	5.3	NaN	NaN	NaN	NaN	NaN	NaN	NaN	NaN	NaN	NaN
5.6	5.4	NaN	NaN	NaN	5.2	NaN	NaN	NaN	NaN	5.2	NaN	5.6	5.4	NaN	NaN	NaN	NaN	NaN	NaN	NaN	NaN	NaN	5.5	5.4	6	NaN	5.5	NaN	NaN	5.4	5.6	5.6	5.4	NaN	NaN	NaN	NaN	NaN	5.3	NaN	NaN	5.6	NaN	NaN	NaN	NaN	NaN	NaN	NaN
NaN	NaN	NaN	NaN	NaN	NaN	NaN	NaN	NaN	NaN	NaN	NaN	NaN	5.1	NaN	NaN	NaN	NaN	NaN	NaN	NaN	NaN	NaN	NaN	NaN	5.6	NaN	NaN	NaN	NaN	NaN	NaN	NaN	NaN	NaN	NaN	NaN	NaN	NaN	NaN	NaN	NaN	NaN	NaN	NaN	NaN	NaN	NaN	NaN	NaN
NaN	NaN	NaN	NaN	NaN	5.2	NaN	NaN	NaN	NaN	5.2	NaN	NaN	NaN	NaN	NaN	NaN	NaN	NaN	NaN	NaN	NaN	NaN	NaN	NaN	5.8	NaN	NaN	NaN	NaN	NaN	NaN	NaN	NaN	NaN	NaN	NaN	NaN	NaN	NaN	NaN	NaN	NaN	NaN	NaN	NaN	NaN	NaN	NaN	NaN
5.4	5.4	NaN	NaN	NaN	NaN	NaN	NaN	NaN	NaN	5.2	NaN	5.6	5.1	NaN	NaN	NaN	NaN	NaN	NaN	NaN	NaN	NaN	5.5	5.4	6.4	5.8	NaN	NaN	NaN	5.4	5.6	5.6	5.4	NaN	NaN	NaN	NaN	NaN	5.3	NaN	5.7	5.6	NaN	NaN	NaN	NaN	NaN	NaN	NaN
5.4	5.4	NaN	NaN	NaN	5.2	NaN	NaN	NaN	NaN	5.2	NaN	5.6	5.1	NaN	NaN	NaN	NaN	NaN	NaN	NaN	NaN	NaN	5.5	5.4	5.7	5.8	NaN	NaN	NaN	5.4	8.3	5.6	5.4	NaN	NaN	NaN	NaN	NaN	5.3	NaN	5.7	5.6	NaN	NaN	NaN	NaN	NaN	NaN	NaN
5.4	5.4	NaN	NaN	NaN	5.2	NaN	NaN	NaN	NaN	5.2	NaN	5.6	5.1	NaN	NaN	NaN	NaN	NaN	NaN	NaN	NaN	NaN	5.5	NaN	6.6	5.8	NaN	NaN	NaN	5.4	5.8	5.6	5.4	NaN	NaN	NaN	NaN	NaN	5.3	NaN	5.7	5.6	NaN	NaN	NaN	NaN	NaN	NaN	NaN
5.4	5.4	NaN	NaN	NaN	5.2	NaN	NaN	NaN	NaN	5.2	NaN	5.6	5.1	NaN	NaN	NaN	NaN	NaN	NaN	NaN	NaN	NaN	5.5	NaN	6.2	5.8	NaN	NaN	NaN	5.4	5.6	5.6	5.4	NaN	NaN	NaN	NaN	NaN	5.3	NaN	5.7	5.6	NaN	NaN	NaN	NaN	NaN	NaN	NaN
NaN	NaN	NaN	NaN	NaN	5.2	NaN	NaN	NaN	NaN	5.2	NaN	NaN	5.1	NaN	NaN	NaN	NaN	NaN	NaN	NaN	NaN	NaN	NaN	NaN	5.5	NaN	NaN	NaN	NaN	NaN	NaN	NaN	NaN	NaN	NaN	NaN	NaN	NaN	NaN	NaN	NaN	NaN	NaN	NaN	NaN	NaN	NaN	NaN	NaN
NaN	NaN	NaN	NaN	NaN	NaN	NaN	NaN	NaN	NaN	NaN	NaN	NaN	5.1	NaN	NaN	NaN	NaN	NaN	NaN	NaN	NaN	NaN	NaN	NaN	6.1	NaN	NaN	NaN	NaN	NaN	NaN	NaN	NaN	NaN	NaN	NaN	NaN	NaN	NaN	NaN	NaN	NaN	NaN	NaN	NaN	NaN	NaN	NaN	NaN
5.6	5.4	NaN	NaN	NaN	5.2	NaN	NaN	NaN	NaN	5.2	NaN	5.6	5.4	NaN	NaN	NaN	NaN	NaN	NaN	NaN	NaN	NaN	5.5	5.4	6.5	5.8	5.5	NaN	NaN	5.4	5.6	5.6	5.4	NaN	NaN	NaN	NaN	NaN	5.3	NaN	5.7	5.6	NaN	NaN	NaN	NaN	NaN	NaN	NaN
5.6	5.4	NaN	NaN	NaN	5.2	NaN	NaN	NaN	NaN	5.2	NaN	5.6	5.4	NaN	NaN	NaN	NaN	NaN	NaN	NaN	NaN	NaN	5.5	5.4	6.3	NaN	5.5	NaN	NaN	5.4	5.6	5.6	5.4	NaN	NaN	NaN	NaN	NaN	5.3	NaN	5.7	5.6	NaN	NaN	NaN	NaN	NaN	NaN	NaN
5.6	5.4	NaN	NaN	NaN	5.2	NaN	NaN	NaN	NaN	5.2	NaN	5.6	5.4	NaN	NaN	NaN	NaN	NaN	NaN	NaN	NaN	NaN	5.5	5.4	6.3	5.8	5.5	NaN	NaN	5.4	5.6	5.6	5.4	NaN	NaN	NaN	NaN	NaN	5.3	NaN	5.7	5.6	NaN	NaN	NaN	NaN	NaN	NaN	NaN
NaN	5.4	NaN	NaN	NaN	5.2	NaN	NaN	NaN	NaN	5.2	NaN	NaN	5.4	NaN	NaN	NaN	NaN	NaN	NaN	NaN	NaN	NaN	5.5	5.4	6.2	NaN	5.5	NaN	NaN	5.4	NaN	NaN	5.4	NaN	NaN	NaN	NaN	NaN	5.3	NaN	NaN	NaN	NaN	NaN	NaN	NaN	NaN	NaN	NaN
NaN	NaN	5.1	5.1	5	NaN	NaN	NaN	NaN	NaN	NaN	5.3	NaN	NaN	5.1	5.2	5.2	NaN	5.1	NaN	5	NaN	5.1	5	NaN	NaN	NaN	5.1	5.8	NaN	5.1	5	5.6	5.2	5.1	5.2	5.1	5.2	5.2	NaN	5	5.2	NaN	5.1	NaN	5.7	5.5	NaN	5.4	5.8
NaN	NaN	NaN	NaN	NaN	NaN	NaN	NaN	NaN	NaN	NaN	NaN	NaN	NaN	NaN	NaN	NaN	NaN	NaN	NaN	NaN	NaN	NaN	NaN	NaN	NaN	NaN	NaN	NaN	NaN	NaN	NaN	NaN	NaN	NaN	NaN	NaN	NaN	NaN	NaN	NaN	NaN	NaN	NaN	NaN	NaN	NaN	NaN	NaN	NaN
NaN	NaN	NaN	NaN	NaN	NaN	NaN	NaN	NaN	NaN	NaN	NaN	NaN	NaN	NaN	NaN	NaN	NaN	NaN	NaN	NaN	NaN	NaN	NaN	NaN	NaN	NaN	NaN	NaN	NaN	NaN	NaN	NaN	NaN	NaN	NaN	NaN	NaN	NaN	NaN	NaN	NaN	NaN	NaN	NaN	NaN	NaN	NaN	NaN	NaN
NaN	NaN	NaN	NaN	NaN	NaN	NaN	NaN	NaN	NaN	NaN	NaN	NaN	NaN	NaN	NaN	NaN	NaN	NaN	NaN	NaN	NaN	NaN	NaN	NaN	NaN	NaN	NaN	NaN	NaN	NaN	NaN	NaN	NaN	NaN	NaN	NaN	NaN	NaN	NaN	NaN	NaN	NaN	NaN	NaN	NaN	NaN	NaN	NaN	NaN
5.4	5.4	NaN	NaN	NaN	5.2	NaN	NaN	NaN	NaN	5.2	NaN	NaN	5.1	NaN	NaN	NaN	NaN	NaN	NaN	NaN	NaN	NaN	NaN	5.4	5.6	NaN	NaN	NaN	NaN	5.4	NaN	NaN	5.4	NaN	NaN	NaN	NaN	NaN	5.3	NaN	NaN	5.6	NaN	NaN	NaN	NaN	NaN	NaN	NaN
5.4	5.4	NaN	NaN	NaN	5.2	NaN	NaN	NaN	NaN	5.2	NaN	NaN	5.1	NaN	NaN	NaN	NaN	NaN	NaN	NaN	NaN	NaN	NaN	NaN	5.4	NaN	NaN	NaN	NaN	5.4	NaN	NaN	5.4	NaN	NaN	NaN	NaN	NaN	5.3	NaN	NaN	NaN	NaN	NaN	NaN	NaN	NaN	NaN	NaN
NaN	NaN	NaN	NaN	NaN	5.2	NaN	NaN	NaN	NaN	5.2	NaN	NaN	5.1	NaN	NaN	NaN	NaN	NaN	NaN	NaN	NaN	NaN	NaN	NaN	NaN	NaN	NaN	NaN	NaN	NaN	NaN	NaN	NaN	NaN	NaN	NaN	NaN	NaN	NaN	NaN	NaN	NaN	NaN	NaN	NaN	NaN	NaN	NaN	NaN
6.2	NaN	5.4	5.1	5.2	NaN	NaN	5.8	NaN	NaN	NaN	5.1	NaN	NaN	NaN	NaN	NaN	NaN	5.2	NaN	5	NaN	5.5	5.5	NaN	NaN	NaN	5.1	5	5.4	NaN	NaN	8.3	NaN	5.6	NaN	NaN	NaN	5.6	5.9	NaN	5.8	NaN	NaN	NaN	5.7	5.1	5.8	5.4	NaN
6.2	NaN	5.1	5.1	5	5.9	6.5	6.5	NaN	NaN	6.1	5.2	NaN	NaN	5.4	5.5	5.4	NaN	5.1	4	5	5.9	5.1	5	NaN	NaN	NaN	5.1	5.3	5.4	5.6	6	7.6	5.2	5.5	5.4	5.3	5.2	5.2	5.9	5	5.2	NaN	5.1	5.4	5.7	5.5	5.8	5.4	5.8
6.2	NaN	NaN	NaN	NaN	NaN	NaN	6.7	NaN	NaN	NaN	NaN	NaN	NaN	NaN	NaN	NaN	NaN	NaN	NaN	NaN	NaN	NaN	NaN	NaN	NaN	NaN	NaN	NaN	NaN	NaN	NaN	8.8	NaN	NaN	NaN	NaN	NaN	NaN	NaN	NaN	NaN	NaN	NaN	NaN	NaN	NaN	NaN	NaN	NaN
6.2	NaN	5.1	5.1	5	NaN	5.7	5.8	NaN	NaN	NaN	5.4	NaN	NaN	5.1	5.2	5.2	NaN	5.4	NaN	5	6.6	5.7	5.4	NaN	NaN	NaN	5.1	5.2	5.4	5.9	7.6	6	5.2	5.3	5.2	5.9	NaN	5.8	5.9	5	5.6	NaN	NaN	5.4	5.7	5.1	5.8	5.4	NaN
5.6	5.4	NaN	NaN	NaN	5.2	NaN	NaN	NaN	NaN	5.2	NaN	5.6	5.4	NaN	NaN	NaN	NaN	NaN	NaN	NaN	NaN	NaN	5.5	5.4	7.3	5.8	5.5	NaN	NaN	5.4	5.6	7.5	5.4	NaN	NaN	NaN	NaN	NaN	5.3	NaN	5.7	5.6	NaN	NaN	NaN	NaN	NaN	NaN	NaN
6.7	5.4	NaN	NaN	NaN	5.5	NaN	NaN	NaN	NaN	5.2	NaN	5.8	5.4	NaN	NaN	NaN	NaN	NaN	NaN	NaN	NaN	NaN	5.5	7.5	5.5	5.8	5.5	NaN	NaN	5.4	6.7	5.8	5.4	NaN	NaN	NaN	NaN	NaN	5.3	NaN	5.7	5.6	NaN	NaN	NaN	NaN	NaN	NaN	NaN
6.8	5.4	NaN	NaN	NaN	5.6	NaN	NaN	NaN	NaN	5.2	NaN	6.1	5.6	NaN	NaN	NaN	NaN	NaN	NaN	NaN	NaN	NaN	7.6	7.2	5.6	6.1	5.5	NaN	NaN	5.5	6.8	6.2	5.4	NaN	NaN	NaN	NaN	NaN	5.3	NaN	5.7	5.9	NaN	NaN	NaN	NaN	NaN	NaN	NaN
5.9	5.4	NaN	NaN	NaN	5.2	NaN	NaN	NaN	NaN	5.2	NaN	5.6	5.4	NaN	NaN	NaN	NaN	NaN	NaN	NaN	NaN	NaN	7.2	6.3	5.4	5.8	5.5	NaN	NaN	5.4	6.4	5.6	5.4	NaN	NaN	NaN	NaN	NaN	5.3	NaN	5.7	5.6	NaN	NaN	NaN	NaN	NaN	NaN	NaN
5.9	5.4	NaN	NaN	NaN	5.7	NaN	NaN	NaN	NaN	5.2	NaN	6	5.7	NaN	NaN	NaN	NaN	NaN	NaN	NaN	NaN	NaN	5.5	5.5	6.1	NaN	6.3	NaN	NaN	5.4	5.6	5.7	5.4	NaN	NaN	NaN	NaN	NaN	5.3	NaN	NaN	5.6	NaN	NaN	NaN	NaN	NaN	NaN	NaN
NaN	NaN	NaN	NaN	NaN	NaN	NaN	NaN	NaN	NaN	NaN	NaN	NaN	NaN	NaN	NaN	NaN	NaN	NaN	NaN	NaN	NaN	NaN	NaN	NaN	5.6	NaN	5.5	NaN	NaN	NaN	NaN	NaN	NaN	NaN	NaN	NaN	NaN	NaN	NaN	NaN	NaN	NaN	NaN	NaN	NaN	NaN	NaN	NaN	NaN
5.4	6	NaN	NaN	NaN	5.2	NaN	NaN	NaN	NaN	5.2	NaN	5.6	5.1	NaN	NaN	NaN	NaN	NaN	NaN	NaN	NaN	NaN	5.5	5.4	5.4	5.8	NaN	NaN	NaN	5.4	5.9	5.6	5.4	NaN	NaN	NaN	NaN	NaN	5.3	NaN	5.7	5.6	NaN	NaN	NaN	NaN	NaN	NaN	NaN
5.7	5.8	NaN	NaN	NaN	5.2	NaN	NaN	NaN	NaN	5.2	NaN	5.6	5.1	NaN	NaN	NaN	NaN	NaN	NaN	NaN	NaN	NaN	5.5	5.4	7.2	5.8	NaN	NaN	NaN	5.5	6.8	5.6	5.4	NaN	NaN	NaN	NaN	NaN	5.3	NaN	5.7	5.8	NaN	NaN	NaN	NaN	NaN	NaN	NaN
5.6	6.7	NaN	NaN	NaN	5.2	NaN	NaN	NaN	NaN	5.2	NaN	5.6	5.1	NaN	NaN	NaN	NaN	NaN	NaN	NaN	NaN	NaN	5.9	5.4	5.4	5.8	NaN	NaN	NaN	6.5	7.1	5.6	6	NaN	NaN	NaN	NaN	NaN	5.3	NaN	5.7	5.6	NaN	NaN	NaN	NaN	NaN	NaN	NaN
5.6	5.6	NaN	NaN	NaN	5.5	NaN	NaN	NaN	NaN	5.2	NaN	5.6	5.4	NaN	NaN	NaN	NaN	NaN	NaN	NaN	NaN	NaN	8.2	5.4	6.5	6.7	6.6	NaN	NaN	5.7	6.9	5.6	6.6	NaN	NaN	NaN	NaN	NaN	6.5	NaN	5.9	6.2	NaN	NaN	NaN	NaN	NaN	NaN	NaN
NaN	6.5	5.1	5.1	5	5.4	NaN	5.8	NaN	NaN	5.9	5.5	NaN	NaN	5.1	5.2	5.2	NaN	6.3	NaN	5	5.9	7.1	6.5	NaN	6.7	NaN	5.1	5.8	NaN	5.7	7	5.6	5.3	5.1	5.2	5.1	5.2	6.6	5.9	5	6	5.6	5.1	NaN	5.7	5.5	5.8	5.4	NaN
NaN	5.8	NaN	NaN	NaN	5.2	NaN	NaN	NaN	NaN	NaN	NaN	NaN	NaN	NaN	NaN	NaN	NaN	NaN	NaN	NaN	NaN	NaN	NaN	NaN	7.1	NaN	NaN	NaN	NaN	5.5	7	NaN	5.4	NaN	NaN	NaN	NaN	NaN	NaN	NaN	5.7	5.7	NaN	NaN	NaN	NaN	NaN	NaN	NaN
NaN	5.9	NaN	NaN	NaN	NaN	NaN	NaN	NaN	NaN	NaN	NaN	NaN	NaN	NaN	NaN	NaN	NaN	NaN	NaN	NaN	NaN	NaN	NaN	NaN	NaN	NaN	NaN	NaN	NaN	NaN	5.6	NaN	NaN	NaN	NaN	NaN	NaN	NaN	NaN	NaN	NaN	NaN	NaN	NaN	NaN	NaN	NaN	NaN	NaN
NaN	6.1	NaN	NaN	NaN	5.2	NaN	NaN	NaN	NaN	NaN	NaN	NaN	NaN	NaN	NaN	NaN	NaN	NaN	NaN	NaN	NaN	NaN	NaN	NaN	7.2	NaN	NaN	NaN	NaN	5.4	6.6	NaN	5.4	NaN	NaN	NaN	NaN	NaN	NaN	NaN	5.7	5.6	NaN	NaN	NaN	NaN	NaN	NaN	NaN
5.5	6.9	NaN	NaN	NaN	5.2	NaN	NaN	NaN	NaN	5.2	NaN	5.6	5.2	NaN	NaN	NaN	NaN	NaN	NaN	NaN	NaN	NaN	5.5	5.4	5.4	5.8	5.5	NaN	NaN	5.4	6.9	5.6	5.4	NaN	NaN	NaN	NaN	NaN	5.3	NaN	5.7	5.6	NaN	NaN	NaN	NaN	NaN	NaN	NaN
5.4	6.9	NaN	NaN	NaN	5.2	NaN	NaN	NaN	NaN	5.2	NaN	5.6	5.1	NaN	NaN	NaN	NaN	NaN	NaN	NaN	NaN	NaN	5.5	5.4	5.4	5.8	NaN	NaN	NaN	5.4	7.2	5.6	5.4	NaN	NaN	NaN	NaN	NaN	5.3	NaN	5.7	5.6	NaN	NaN	NaN	NaN	NaN	NaN	NaN
5.4	5.5	NaN	NaN	NaN	5.2	NaN	NaN	NaN	NaN	5.2	NaN	5.6	5.1	NaN	NaN	NaN	NaN	NaN	NaN	NaN	NaN	NaN	5.5	5.4	7	5.8	NaN	NaN	NaN	5.4	5.6	5.6	5.4	NaN	NaN	NaN	NaN	NaN	5.3	NaN	5.7	5.6	NaN	NaN	NaN	NaN	NaN	NaN	NaN
5.4	7.2	NaN	NaN	NaN	5.2	NaN	NaN	NaN	NaN	5.2	NaN	5.6	5.1	NaN	NaN	NaN	NaN	NaN	NaN	NaN	NaN	NaN	5.5	5.4	5.4	5.8	NaN	NaN	NaN	5.4	5.6	5.6	5.4	NaN	NaN	NaN	NaN	NaN	5.3	NaN	5.7	5.6	NaN	NaN	NaN	NaN	NaN	NaN	NaN
6.2	NaN	5.1	5.1	5	5.9	NaN	5.8	NaN	NaN	5.9	5.1	NaN	NaN	5.1	5.3	5.2	NaN	6.9	NaN	5	5.9	7.3	6.7	NaN	5.4	NaN	5.1	5.8	NaN	7.4	7.9	5.9	5.2	5.1	5.2	5.1	5.2	7.1	5.9	5	NaN	NaN	5.6	NaN	5.7	5.5	5.8	5.4	NaN
NaN	NaN	5.1	5.4	5	NaN	NaN	NaN	NaN	NaN	NaN	5.3	NaN	NaN	5.1	5.2	5.2	NaN	5.1	NaN	5	NaN	5.5	5	NaN	NaN	NaN	5.1	NaN	NaN	5.1	5	5.6	5.2	5.1	5.2	5.1	5.5	5.2	NaN	5	5.2	NaN	5.8	NaN	NaN	5.5	NaN	5.4	NaN
6.2	NaN	5.1	5.1	5	5.9	NaN	5.8	NaN	NaN	5.9	5.3	NaN	NaN	5.1	5.2	5.2	NaN	5.1	NaN	5	5.9	6.1	5.2	NaN	NaN	NaN	5.1	5.8	NaN	6.1	8.3	5.6	5.2	5.1	5.2	5.1	5.2	5.2	5.9	5	6.6	NaN	5.1	NaN	5.7	5.5	5.8	5.4	5.8
6.2	NaN	5.1	5.1	5	5.9	5.7	5.8	NaN	NaN	5.9	5.2	NaN	NaN	5.1	5.2	5.2	NaN	5.1	NaN	5.2	5.9	5.2	5	NaN	NaN	NaN	7.9	5.3	5.4	5.1	5	5.6	5.2	5.1	5.2	5.1	5.2	5.2	5.9	5.5	5.2	NaN	5.1	5.4	5.7	5.5	5.8	5.4	5.8
5.4	5.4	NaN	NaN	NaN	5.2	NaN	NaN	NaN	NaN	5.2	NaN	5.6	5.1	NaN	NaN	NaN	NaN	NaN	NaN	NaN	NaN	NaN	5.5	5.4	5.8	5.8	NaN	NaN	NaN	5.6	7.1	5.6	5.4	NaN	NaN	NaN	NaN	NaN	5.3	NaN	5.7	5.6	NaN	NaN	NaN	NaN	NaN	NaN	NaN
6.2	NaN	5.1	5.1	5	5.9	NaN	5.8	NaN	NaN	5.9	5.3	NaN	NaN	5.1	5.2	5.2	NaN	5.1	NaN	5	5.9	5.1	5	NaN	NaN	NaN	5.1	5.8	NaN	5.7	7.8	5.6	5.2	5.1	5.2	5.1	5.2	5.2	5.9	5	5.2	NaN	5.1	NaN	5.7	5.5	5.8	5.4	5.8
6.2	NaN	5.1	5.1	5	5.9	NaN	5.8	NaN	NaN	5.9	5.3	NaN	NaN	5.1	5.2	5.2	NaN	5.1	NaN	5	5.9	5.1	5	NaN	NaN	NaN	5.1	5.8	NaN	5.1	6.5	5.6	5.2	5.1	5.2	5.1	5.2	5.2	5.9	5	5.5	NaN	5.1	NaN	5.7	5.5	5.8	5.4	5.8
6.2	NaN	5.1	5.1	5	5.9	NaN	5.8	NaN	NaN	5.9	5.3	NaN	NaN	5.1	5.2	5.2	NaN	5.1	NaN	5	5.9	5.1	5	NaN	NaN	NaN	5.1	5.8	NaN	5.1	6.8	5.6	5.2	5.1	5.2	5.1	5.6	5.2	5.9	5	5.2	NaN	5.1	NaN	5.7	5.5	5.8	5.4	5.8
6.2	NaN	5.1	5.1	5	5.9	NaN	5.8	NaN	NaN	5.9	5.3	NaN	NaN	5.1	5.2	5.2	NaN	5.1	NaN	5	5.9	5.1	5	NaN	NaN	NaN	5.1	5.8	NaN	5.1	5.9	5.6	5.2	5.1	5.2	5.1	5.2	7.3	5.9	5	5.2	NaN	5.1	NaN	5.7	5.5	5.8	5.4	NaN
NaN	NaN	5.1	5.1	5	NaN	NaN	5.8	NaN	NaN	NaN	5.1	NaN	NaN	NaN	NaN	NaN	NaN	NaN	NaN	5	NaN	5.1	5	NaN	NaN	NaN	7.1	5	5.4	NaN	NaN	5.6	NaN	5.1	NaN	NaN	NaN	5.2	5.9	NaN	5.2	NaN	NaN	NaN	5.7	5.5	5.8	5.4	NaN
6.2	NaN	5.1	5.1	5	5.9	NaN	5.8	NaN	NaN	5.9	5.3	NaN	NaN	5.1	5.2	5.2	NaN	5.1	NaN	5	5.9	5.1	5	NaN	NaN	NaN	5.1	5.8	NaN	5.1	5	5.6	5.2	5.1	5.2	5.1	5.2	5.2	5.9	5	5.2	NaN	5.1	NaN	5.7	5.5	5.8	5.4	5.8
5.5	5.7	NaN	NaN	NaN	5.2	NaN	NaN	NaN	NaN	5.2	NaN	5.6	5.2	NaN	NaN	NaN	NaN	NaN	NaN	NaN	NaN	NaN	5.5	5.4	5.5	5.9	5.5	NaN	NaN	5.4	6.8	5.6	5.4	NaN	NaN	NaN	NaN	NaN	5.3	NaN	5.7	5.6	NaN	NaN	NaN	NaN	NaN	NaN	NaN
5.7	5.4	NaN	NaN	NaN	5.8	NaN	NaN	NaN	NaN	5.2	NaN	6	5.4	NaN	NaN	NaN	NaN	NaN	NaN	NaN	NaN	NaN	7.7	6.2	5.4	6.1	5.7	NaN	NaN	6.4	7.6	5.6	6.7	NaN	NaN	NaN	NaN	NaN	5.9	NaN	6.4	6.3	NaN	NaN	NaN	NaN	NaN	NaN	NaN
NaN	NaN	NaN	NaN	NaN	NaN	NaN	NaN	NaN	NaN	NaN	NaN	NaN	NaN	NaN	NaN	NaN	NaN	NaN	NaN	NaN	NaN	NaN	NaN	NaN	NaN	NaN	NaN	NaN	NaN	NaN	5.9	NaN	NaN	NaN	NaN	NaN	NaN	NaN	NaN	NaN	NaN	NaN	NaN	NaN	NaN	NaN	NaN	NaN	NaN
6.2	NaN	5.1	5.1	5.1	5.9	NaN	5.8	NaN	NaN	5.9	5.3	NaN	NaN	5.1	5.2	5.2	NaN	5.1	NaN	5	5.9	5.1	5	NaN	NaN	NaN	5.1	5.8	NaN	5.7	6.2	5.6	5.2	5.1	5.3	5.1	5.2	5.2	5.9	5	5.2	NaN	5.1	NaN	5.7	5.5	5.8	5.4	5.8
5.4	5.4	NaN	NaN	NaN	5.2	NaN	NaN	NaN	NaN	5.2	NaN	5.6	5.1	NaN	NaN	NaN	NaN	NaN	NaN	NaN	NaN	NaN	5.5	5.4	5.4	5.8	5.5	NaN	NaN	5.4	5.6	5.6	5.4	NaN	NaN	NaN	NaN	NaN	5.3	NaN	5.7	5.6	NaN	NaN	NaN	NaN	NaN	NaN	NaN
5.6	5.4	NaN	NaN	NaN	5.2	NaN	NaN	NaN	NaN	5.2	NaN	5.6	5.4	NaN	NaN	NaN	NaN	NaN	NaN	NaN	NaN	NaN	5.5	5.4	5.4	5.8	5.5	NaN	NaN	5.4	5.6	5.6	5.4	NaN	NaN	NaN	NaN	NaN	5.3	NaN	5.7	5.6	NaN	NaN	NaN	NaN	NaN	NaN	NaN
5.8	5.4	7.5	7.1	7.1	5.5	NaN	6.5	NaN	NaN	5.5	5.3	5.6	5.4	5.8	6.6	6.6	NaN	5.1	4	5.7	7	5.1	5.2	5.4	5.4	5.8	5.2	5.8	NaN	5.2	5.2	5.8	5.3	5.1	6.2	5.1	6.8	7.8	5.5	5	5.4	5.6	7.4	NaN	6.3	5.5	7.5	5.4	5.8
NaN	NaN	5.1	5.1	5	NaN	5.7	NaN	NaN	NaN	NaN	5.3	NaN	NaN	5.1	5.2	5.2	NaN	5.1	4	5	NaN	5.1	5.1	NaN	NaN	NaN	5.1	NaN	NaN	5.1	6.6	5.6	5.2	6.8	5.2	5.1	5.2	5.2	NaN	5.4	5.2	NaN	5.1	5.4	5.7	5.5	NaN	5.4	NaN
NaN	NaN	NaN	NaN	NaN	NaN	NaN	NaN	NaN	NaN	NaN	NaN	NaN	NaN	NaN	NaN	NaN	NaN	NaN	4	NaN	NaN	NaN	NaN	NaN	NaN	NaN	NaN	NaN	NaN	NaN	NaN	NaN	NaN	NaN	NaN	NaN	NaN	NaN	NaN	NaN	NaN	NaN	NaN	NaN	NaN	NaN	NaN	NaN	NaN
NaN	NaN	NaN	NaN	NaN	5.5	NaN	NaN	NaN	NaN	NaN	NaN	NaN	NaN	NaN	NaN	NaN	NaN	NaN	NaN	NaN	NaN	NaN	NaN	NaN	NaN	NaN	NaN	NaN	NaN	NaN	NaN	NaN	NaN	NaN	NaN	NaN	NaN	NaN	NaN	NaN	NaN	NaN	NaN	NaN	NaN	NaN	NaN	NaN	NaN
NaN	5.4	NaN	NaN	NaN	6	NaN	NaN	NaN	NaN	5.2	NaN	6.3	5.6	NaN	NaN	NaN	NaN	NaN	NaN	NaN	NaN	NaN	5.5	5.4	5.5	5.8	NaN	NaN	NaN	5.4	5.8	5.8	5.4	NaN	NaN	NaN	NaN	NaN	6.1	NaN	5.7	5.6	NaN	NaN	NaN	NaN	NaN	NaN	NaN
5.4	5.4	NaN	NaN	NaN	5.2	NaN	NaN	NaN	NaN	5.2	NaN	6.1	5.1	NaN	NaN	NaN	NaN	NaN	NaN	NaN	NaN	NaN	5.5	5.4	5.5	5.8	NaN	NaN	NaN	5.4	5.6	5.6	5.4	NaN	NaN	NaN	NaN	NaN	5.3	NaN	5.7	5.6	NaN	NaN	NaN	NaN	NaN	NaN	NaN
5.6	5.6	NaN	NaN	NaN	5.2	NaN	NaN	NaN	NaN	5.2	NaN	5.6	5.4	NaN	NaN	NaN	NaN	NaN	NaN	NaN	NaN	NaN	5.5	5.4	5.5	5.8	7.1	NaN	NaN	5.4	6.5	5.6	5.8	NaN	NaN	NaN	NaN	NaN	5.3	NaN	5.7	5.6	NaN	NaN	NaN	NaN	NaN	NaN	NaN
5.6	5.4	NaN	NaN	NaN	5.2	NaN	NaN	NaN	NaN	5.2	NaN	5.6	5.4	NaN	NaN	NaN	NaN	NaN	NaN	NaN	NaN	NaN	5.5	5.4	5.4	5.8	5.5	NaN	NaN	5.4	5.6	5.6	5.4	NaN	NaN	NaN	NaN	NaN	5.3	NaN	5.7	5.6	NaN	NaN	NaN	NaN	NaN	NaN	NaN
NaN	NaN	5.1	5.1	5	NaN	NaN	NaN	NaN	NaN	NaN	5.1	NaN	NaN	NaN	NaN	NaN	NaN	5.1	NaN	5	NaN	5.3	5	NaN	NaN	NaN	5.1	5	NaN	NaN	NaN	NaN	NaN	5.6	NaN	NaN	NaN	6	NaN	NaN	5.7	NaN	NaN	NaN	NaN	5.1	NaN	NaN	NaN
NaN	NaN	5.1	5.1	5	NaN	NaN	NaN	NaN	NaN	NaN	5.1	NaN	NaN	NaN	NaN	NaN	NaN	5.1	NaN	5	NaN	5.2	5	NaN	NaN	NaN	5.1	5	NaN	NaN	NaN	NaN	NaN	5.1	NaN	NaN	NaN	5.3	NaN	NaN	5.4	NaN	NaN	NaN	NaN	5.1	NaN	NaN	NaN
NaN	5.4	NaN	NaN	NaN	5.2	NaN	NaN	NaN	NaN	5.2	NaN	NaN	5.4	NaN	NaN	NaN	NaN	NaN	NaN	NaN	NaN	NaN	NaN	5.4	5.4	NaN	6.4	NaN	NaN	5.4	NaN	NaN	5.4	NaN	NaN	NaN	NaN	NaN	5.3	NaN	NaN	NaN	NaN	NaN	NaN	NaN	NaN	NaN	NaN
NaN	NaN	NaN	NaN	NaN	5.2	NaN	NaN	NaN	NaN	5.2	NaN	NaN	NaN	NaN	NaN	NaN	NaN	NaN	NaN	NaN	NaN	NaN	NaN	5.6	NaN	NaN	NaN	NaN	NaN	NaN	NaN	NaN	NaN	NaN	NaN	NaN	NaN	NaN	5.3	NaN	NaN	NaN	NaN	NaN	NaN	NaN	NaN	NaN	NaN
NaN	NaN	NaN	NaN	NaN	NaN	NaN	NaN	NaN	NaN	NaN	NaN	NaN	NaN	NaN	NaN	NaN	NaN	NaN	NaN	NaN	NaN	NaN	NaN	NaN	NaN	NaN	NaN	NaN	NaN	NaN	NaN	NaN	NaN	NaN	NaN	NaN	NaN	NaN	NaN	NaN	NaN	NaN	NaN	NaN	NaN	NaN	NaN	NaN	NaN
5.6	5.4	NaN	NaN	NaN	5.2	NaN	NaN	NaN	NaN	5.2	NaN	5.6	5.4	NaN	NaN	NaN	NaN	NaN	NaN	NaN	NaN	NaN	5.5	5.4	5.4	5.8	5.5	NaN	NaN	5.4	5.6	5.6	5.4	NaN	NaN	NaN	NaN	NaN	5.3	NaN	5.7	5.6	NaN	NaN	NaN	NaN	NaN	NaN	NaN
NaN	5.4	NaN	NaN	NaN	5.2	NaN	NaN	NaN	NaN	5.2	NaN	NaN	5.4	NaN	NaN	NaN	NaN	NaN	NaN	NaN	NaN	NaN	NaN	5.4	5.4	NaN	NaN	NaN	NaN	5.4	NaN	NaN	5.4	NaN	NaN	NaN	NaN	NaN	5.3	NaN	NaN	NaN	NaN	NaN	NaN	NaN	NaN	NaN	NaN
7.1	NaN	NaN	NaN	NaN	NaN	NaN	NaN	NaN	NaN	5.2	NaN	NaN	5.4	NaN	NaN	NaN	NaN	NaN	NaN	NaN	NaN	NaN	NaN	5.8	NaN	NaN	NaN	NaN	NaN	NaN	NaN	6.2	NaN	NaN	NaN	NaN	NaN	NaN	NaN	NaN	NaN	NaN	NaN	NaN	NaN	NaN	NaN	NaN	NaN
5.6	5.4	NaN	NaN	NaN	5.7	NaN	NaN	NaN	NaN	5.4	NaN	5.9	5.4	NaN	NaN	NaN	NaN	NaN	4	NaN	NaN	NaN	7.6	6.7	5.5	6.4	5.6	NaN	NaN	5.4	6.2	6.3	5.4	NaN	NaN	NaN	NaN	NaN	6.4	NaN	5.7	5.9	NaN	NaN	NaN	NaN	NaN	NaN	NaN
5.6	5.4	NaN	NaN	NaN	5.2	NaN	NaN	NaN	NaN	5.2	NaN	5.9	5.4	NaN	NaN	NaN	NaN	NaN	4	NaN	NaN	NaN	6.4	6	5.4	5.9	5.5	NaN	NaN	5.4	5.7	6.3	5.4	NaN	NaN	NaN	NaN	NaN	5.3	NaN	5.7	5.8	NaN	NaN	NaN	NaN	NaN	NaN	NaN
6.2	NaN	5.1	5.1	5	5.9	6.5	5.8	NaN	NaN	NaN	5.7	NaN	NaN	NaN	NaN	NaN	NaN	6.4	NaN	5.2	6.9	6.5	5.9	NaN	NaN	NaN	6.9	7.7	5.4	5.1	6.2	5.9	5.2	5.1	NaN	7.2	NaN	6.5	7.8	5	6	NaN	NaN	5.4	5.7	5.1	5.8	5.4	NaN
6.2	NaN	5.1	5.1	5	5.5	NaN	5.8	NaN	NaN	NaN	5.3	NaN	NaN	NaN	NaN	NaN	NaN	6.6	NaN	5.4	NaN	6.2	6.1	NaN	NaN	NaN	7	7.5	5.4	NaN	NaN	5.6	NaN	5.1	NaN	NaN	NaN	6.5	7.7	NaN	5.5	NaN	NaN	NaN	5.7	5.1	5.8	5.4	NaN
NaN	NaN	5.1	5.1	5	5.9	5.7	5.8	NaN	NaN	NaN	5.3	NaN	NaN	5.1	5.7	5.5	NaN	5.7	4	5	5.9	5.3	5.2	NaN	NaN	NaN	5.1	6.8	NaN	6.4	6.9	5.6	5.2	5.1	5.9	6.3	6	6	6.4	5	5.3	NaN	5.1	5.4	5.7	5.5	5.8	5.4	6.2
NaN	NaN	NaN	NaN	NaN	5.3	NaN	NaN	NaN	NaN	NaN	NaN	NaN	NaN	NaN	NaN	NaN	NaN	NaN	4	NaN	NaN	NaN	NaN	NaN	NaN	NaN	NaN	NaN	NaN	NaN	NaN	NaN	NaN	NaN	NaN	NaN	NaN	NaN	NaN	NaN	NaN	5.7	NaN	NaN	NaN	NaN	NaN	NaN	NaN
NaN	NaN	NaN	NaN	5	NaN	NaN	NaN	NaN	NaN	NaN	NaN	NaN	NaN	NaN	NaN	NaN	NaN	5.1	NaN	5	NaN	NaN	5	NaN	NaN	NaN	NaN	NaN	NaN	NaN	NaN	NaN	NaN	NaN	NaN	NaN	NaN	NaN	NaN	NaN	5.9	NaN	NaN	NaN	NaN	NaN	NaN	NaN	NaN
NaN	NaN	NaN	NaN	NaN	NaN	NaN	NaN	NaN	NaN	NaN	NaN	NaN	NaN	NaN	NaN	NaN	NaN	NaN	NaN	NaN	NaN	NaN	NaN	NaN	NaN	NaN	NaN	NaN	NaN	NaN	NaN	NaN	NaN	NaN	NaN	NaN	NaN	NaN	NaN	NaN	NaN	NaN	NaN	NaN	NaN	5.7	NaN	NaN	NaN
NaN	NaN	NaN	NaN	NaN	NaN	NaN	NaN	NaN	NaN	NaN	NaN	NaN	NaN	NaN	NaN	NaN	NaN	NaN	NaN	NaN	NaN	NaN	NaN	NaN	NaN	NaN	NaN	NaN	NaN	NaN	NaN	NaN	NaN	NaN	NaN	NaN	NaN	NaN	NaN	NaN	NaN	NaN	NaN	NaN	NaN	NaN	NaN	NaN	NaN
NaN	NaN	NaN	NaN	NaN	NaN	NaN	NaN	NaN	NaN	NaN	NaN	NaN	NaN	5.3	NaN	NaN	NaN	NaN	NaN	5.2	NaN	NaN	NaN	NaN	NaN	NaN	NaN	NaN	NaN	NaN	NaN	NaN	NaN	NaN	NaN	NaN	NaN	NaN	NaN	NaN	NaN	NaN	NaN	NaN	NaN	NaN	6	NaN	NaN
NaN	NaN	5.1	5.1	5	NaN	NaN	NaN	NaN	NaN	NaN	5.5	NaN	NaN	5.1	5.2	5.2	NaN	5.1	NaN	5	NaN	5.1	5	NaN	NaN	NaN	5.1	NaN	NaN	5.1	5	5.6	5.2	5.1	5.2	5.1	5.2	5.2	NaN	5	5.2	NaN	5.1	NaN	NaN	5.5	NaN	5.4	NaN
NaN	NaN	NaN	NaN	NaN	NaN	NaN	NaN	NaN	NaN	NaN	NaN	NaN	NaN	NaN	NaN	NaN	NaN	NaN	NaN	NaN	NaN	NaN	NaN	NaN	NaN	NaN	NaN	NaN	NaN	NaN	NaN	NaN	NaN	NaN	NaN	NaN	NaN	NaN	NaN	NaN	NaN	NaN	NaN	NaN	NaN	NaN	NaN	NaN	NaN
NaN	NaN	5.8	6.1	5.3	NaN	5.7	5.8	NaN	NaN	5.9	5.4	NaN	NaN	5.2	6	5.7	NaN	5.1	NaN	5	6.2	5.3	5	NaN	NaN	NaN	5.1	5.8	NaN	5.1	5	5.6	5.2	5.1	5.3	5.1	5.7	6	5.9	5	5.8	NaN	6.2	6.1	5.7	5.5	5.8	5.4	5.8
NaN	NaN	5.1	5.1	5	NaN	NaN	NaN	NaN	NaN	NaN	5.1	NaN	NaN	NaN	NaN	NaN	NaN	5.1	NaN	5.4	NaN	5.1	5	NaN	NaN	NaN	5.1	5	5.4	NaN	NaN	5.6	NaN	5.1	NaN	NaN	NaN	5.2	6.7	NaN	5.2	NaN	NaN	NaN	NaN	5.5	NaN	5.4	NaN
NaN	NaN	5.1	5.1	5	NaN	NaN	NaN	NaN	NaN	NaN	5.3	NaN	NaN	5.1	5.2	5.2	NaN	5.1	NaN	5.3	NaN	5.1	5	NaN	NaN	NaN	5.1	5.8	NaN	5.1	5.8	5.6	5.2	5.1	5.2	5.3	5.3	5.2	NaN	5.6	5.2	NaN	5.1	5.4	NaN	5.5	NaN	5.4	NaN
6.2	NaN	5.1	5.6	5	5.9	5.7	5.8	NaN	NaN	5.9	5.3	NaN	NaN	5.1	5.5	5.2	NaN	5.8	NaN	5.4	6.9	6.4	6.1	NaN	NaN	NaN	5.1	7.4	NaN	6	7.6	5.6	5.2	5.5	5.2	5.1	5.2	5.2	6	5	7	NaN	5.7	NaN	5.7	5.5	6	5.4	5.8
6.2	NaN	5.6	5.3	5	NaN	5.7	5.8	NaN	NaN	5.9	5.3	NaN	NaN	5.1	5.3	5.2	NaN	5.1	NaN	5.3	6.4	5.1	5	NaN	NaN	NaN	5.1	5.8	NaN	6	6.3	5.6	5.3	6.1	5.2	5.1	5.2	5.2	6	5	7	NaN	5.5	5.4	NaN	5.5	NaN	5.4	5.8
NaN	NaN	6	5.1	5	NaN	NaN	5.8	NaN	NaN	NaN	5.1	NaN	NaN	NaN	NaN	NaN	NaN	5.1	NaN	5.3	NaN	5.1	5	NaN	NaN	NaN	5.1	5	5.8	NaN	NaN	5.6	NaN	5.1	NaN	NaN	NaN	5.2	5.9	NaN	6.7	NaN	NaN	NaN	5.7	5.5	5.8	5.4	NaN
NaN	NaN	5.5	5.1	5	NaN	NaN	NaN	NaN	NaN	NaN	5.2	NaN	NaN	5.1	5.2	5.2	NaN	NaN	NaN	5	NaN	5.1	5	NaN	NaN	NaN	5.1	5.3	5.8	5.2	6.4	5.6	5.2	5.1	5.2	5.1	5.2	5.2	NaN	5	5.9	NaN	5.1	5.4	NaN	5.5	NaN	5.4	NaN
NaN	NaN	5.4	5.1	5	NaN	5.7	NaN	NaN	NaN	NaN	5.2	NaN	NaN	5.1	5.2	5.2	NaN	5.1	NaN	5	NaN	5.1	5	NaN	NaN	NaN	5.1	5.3	5.9	5.5	6.8	5.6	5.2	5.1	5.2	5.1	5.2	5.2	NaN	5	6.2	NaN	5.1	5.4	5.7	5.5	NaN	5.4	5.8
NaN	NaN	5.1	5.1	5	NaN	NaN	NaN	NaN	NaN	NaN	5.2	NaN	NaN	5.1	5.2	5.2	NaN	5.1	NaN	5	NaN	5.1	5	NaN	NaN	NaN	5.1	5.3	5.4	5.4	6.6	5.6	5.2	5.1	5.2	5.1	5.2	5.2	NaN	5	5.7	NaN	5.1	5.4	NaN	5.5	NaN	5.4	NaN
NaN	NaN	5.1	5.1	5	NaN	NaN	NaN	NaN	NaN	NaN	5.1	NaN	NaN	5.1	5.2	5.2	NaN	5.1	NaN	5	NaN	5.1	5	NaN	NaN	NaN	5.1	NaN	NaN	5.1	6.4	NaN	5.2	5.1	5.2	5.1	5.2	5.2	NaN	5	5.7	NaN	5.1	NaN	NaN	NaN	NaN	NaN	NaN
4.4	4.1	NaN	NaN	NaN	4.5	NaN	NaN	NaN	NaN	NaN	NaN	4	NaN	NaN	NaN	NaN	NaN	NaN	NaN	NaN	NaN	NaN	NaN	4.1	4.2	4.4	4.6	NaN	NaN	NaN	4.7	4.7	4.3	NaN	NaN	NaN	NaN	NaN	4.4	NaN	4.2	4.7	NaN	NaN	NaN	NaN	NaN	NaN	NaN
NaN	NaN	NaN	NaN	NaN	5.4	NaN	NaN	NaN	NaN	NaN	NaN	6	5.7	NaN	NaN	NaN	NaN	NaN	NaN	NaN	NaN	NaN	NaN	5.5	5.5	6.1	NaN	NaN	NaN	NaN	6.1	6	NaN	NaN	NaN	NaN	NaN	NaN	NaN	NaN	5.9	6.1	NaN	NaN	NaN	NaN	NaN	NaN	NaN
6.2	NaN	5.1	5.1	5	5.9	NaN	5.8	NaN	NaN	5.9	5.3	NaN	NaN	5.1	5.2	5.2	NaN	5.1	NaN	5	7.2	5.1	5	NaN	NaN	NaN	5.1	5.8	NaN	5.1	5.6	5.6	5.2	5.1	5.2	5.1	5.2	6.9	6.8	5	6.2	NaN	5.7	NaN	5.7	5.5	5.8	5.4	5.8
5.7	5.4	NaN	NaN	NaN	6.4	5.9	5.9	NaN	NaN	5.2	NaN	6.4	5.2	NaN	NaN	NaN	NaN	NaN	NaN	NaN	6.1	NaN	5.5	5.4	5.4	5.8	6.2	NaN	NaN	5.4	5.6	6.1	5.4	NaN	NaN	NaN	NaN	5.2	6.7	NaN	5.7	5.6	NaN	NaN	NaN	5.5	NaN	NaN	6.8
6	6.1	NaN	NaN	NaN	6.5	NaN	NaN	NaN	NaN	5.2	NaN	5.6	5.4	NaN	NaN	NaN	NaN	NaN	NaN	NaN	NaN	NaN	7	5.8	7.2	5.8	5.5	NaN	NaN	6.9	8.2	5.9	7.3	NaN	NaN	NaN	NaN	NaN	5.4	NaN	6.6	7	NaN	NaN	NaN	NaN	NaN	NaN	NaN
5.6	5.4	NaN	NaN	NaN	5.2	NaN	NaN	NaN	NaN	7.1	NaN	5.6	5.4	NaN	NaN	NaN	NaN	NaN	NaN	NaN	NaN	NaN	5.5	5.4	6.6	5.8	5.5	NaN	NaN	5.4	5.6	5.6	5.4	NaN	NaN	NaN	NaN	NaN	5.3	NaN	5.7	5.6	NaN	NaN	NaN	NaN	NaN	NaN	NaN
6.2	NaN	5.1	5.1	5	7.2	6.3	6.6	NaN	NaN	6.4	5.4	NaN	NaN	5.5	5.8	5.6	NaN	5.1	NaN	5.4	5.9	5.1	5	NaN	NaN	NaN	5.1	6	5.4	5.1	5	6.9	5.2	5.6	5.2	5.1	5.2	5.2	5.9	5.1	5.2	NaN	5.1	5.4	5.7	5.3	5.8	5.8	5.8
6.2	NaN	5.1	5.1	5	5.9	5.7	5.8	NaN	NaN	5.9	5.3	NaN	NaN	5.1	5.3	5.2	NaN	5.3	4	5	5.9	5.1	5.4	NaN	NaN	NaN	5.1	7.8	NaN	5.2	6.4	5.6	5.2	5.1	5.8	5.9	5.2	5.2	7.7	5	5.9	NaN	5.1	5.4	5.7	5.5	5.8	5.4	5.8
NaN	NaN	5.1	5.1	5	5.9	5.7	5.8	NaN	NaN	5.9	5.3	NaN	NaN	5.1	5.4	5.4	NaN	5.1	4	5	5.9	5.1	5	NaN	NaN	NaN	5.1	7.1	NaN	5.1	6.1	5.6	5.2	5.3	5.2	5.1	5.2	5.2	5.9	6	5.2	NaN	5.1	5.4	5.7	5.5	5.8	5.4	5.8
6.2	NaN	5.1	5.1	5	NaN	5.9	5.8	NaN	NaN	5.9	5.3	NaN	NaN	5.1	5.2	5.2	NaN	5.1	NaN	5	5.9	5.1	5	NaN	NaN	NaN	5.1	7.7	NaN	5.6	6.3	5.6	5.2	5.1	5.3	5.9	5.2	5.2	5.9	5	5.6	NaN	5.1	5.4	5.7	5.5	5.8	5.4	5.8
NaN	NaN	5.1	5.1	5	NaN	NaN	NaN	NaN	NaN	NaN	5.3	NaN	NaN	5.1	5.2	5.2	NaN	5.1	NaN	5	NaN	5.1	5	NaN	NaN	NaN	5.1	6.5	NaN	5.6	6.2	NaN	5.2	5.1	5.2	6.1	6.3	5.2	NaN	5	5.4	NaN	5.1	5.4	NaN	NaN	NaN	5.4	NaN
6.2	NaN	5.1	5.1	5	5.9	5.7	5.8	NaN	NaN	5.9	5.3	NaN	NaN	5.1	5.2	5.2	NaN	5.1	4	5	5.9	5.1	5	NaN	NaN	NaN	5.1	7.4	NaN	5.1	5.4	5.6	5.2	5.1	5.2	5.9	5.2	5.2	5.9	6	5.2	NaN	5.1	5.4	5.7	5.5	5.8	5.4	6.2
5.4	NaN	NaN	NaN	NaN	5.2	NaN	NaN	NaN	NaN	5.2	NaN	5.6	5.1	NaN	NaN	NaN	NaN	NaN	4	NaN	NaN	NaN	NaN	NaN	5.4	5.8	NaN	NaN	NaN	5.4	5.6	5.6	5.4	NaN	NaN	NaN	NaN	NaN	5.3	NaN	5.7	NaN	NaN	NaN	NaN	NaN	NaN	NaN	NaN
7	6.3	NaN	NaN	NaN	6.9	NaN	NaN	NaN	NaN	6.8	NaN	5.6	5.1	NaN	NaN	NaN	NaN	NaN	NaN	NaN	NaN	NaN	6.3	5.7	5.4	5.8	NaN	NaN	NaN	6.1	6.4	6.9	6.5	NaN	NaN	NaN	NaN	NaN	6.6	NaN	5.7	5.8	NaN	NaN	NaN	NaN	NaN	NaN	NaN
5.6	5.4	NaN	NaN	NaN	5.2	NaN	NaN	NaN	NaN	5.2	NaN	5.6	5.4	NaN	NaN	NaN	NaN	NaN	NaN	NaN	NaN	NaN	5.5	5.4	5.4	5.8	5.5	NaN	NaN	5.4	6.8	5.6	5.4	NaN	NaN	NaN	NaN	NaN	5.3	NaN	5.7	5.6	NaN	NaN	NaN	NaN	NaN	NaN	NaN
4.6	5.5	NaN	NaN	NaN	4	NaN	NaN	NaN	NaN	NaN	NaN	4	NaN	NaN	NaN	NaN	NaN	NaN	NaN	NaN	NaN	NaN	5.3	4.3	5.5	4.4	4.4	NaN	NaN	NaN	5.3	4.8	4.6	NaN	NaN	NaN	NaN	NaN	NaN	NaN	4.9	5	NaN	NaN	NaN	NaN	NaN	NaN	NaN
NaN	NaN	5.1	5.1	5	5.7	5.7	NaN	NaN	NaN	NaN	5.3	NaN	NaN	5.1	5.2	5.2	NaN	5.1	NaN	5	NaN	5.1	5	NaN	NaN	NaN	5.1	NaN	NaN	5.2	5.2	5.6	5.2	5.1	5.2	5.2	5.2	5.2	NaN	5	5.2	NaN	5.1	5.4	5.7	5.5	NaN	5.4	NaN
5.6	5.4	NaN	NaN	NaN	5.6	NaN	NaN	NaN	NaN	5.2	NaN	5.6	5.4	NaN	NaN	NaN	NaN	NaN	NaN	NaN	NaN	NaN	5.5	5.4	5.4	5.8	5.8	NaN	NaN	5.4	5.7	6.3	5.4	NaN	NaN	NaN	NaN	NaN	5.3	NaN	5.7	5.6	NaN	NaN	NaN	NaN	NaN	NaN	NaN
5.8	5.4	NaN	NaN	NaN	5.4	NaN	NaN	NaN	NaN	5.2	NaN	5.6	5.4	NaN	NaN	NaN	NaN	NaN	NaN	NaN	NaN	NaN	5.5	5.4	5.4	5.8	5.7	NaN	NaN	5.4	5.8	5.8	6.1	NaN	NaN	NaN	NaN	NaN	5.8	NaN	5.7	5.6	NaN	NaN	NaN	NaN	NaN	NaN	NaN
5.6	5.4	NaN	NaN	NaN	5.6	NaN	NaN	NaN	NaN	5.2	NaN	5.6	5.4	NaN	NaN	NaN	NaN	NaN	NaN	NaN	NaN	NaN	5.5	5.4	5.4	5.8	5.5	NaN	NaN	5.4	5.6	5.6	5.4	NaN	NaN	NaN	NaN	NaN	5.3	NaN	5.7	5.6	NaN	NaN	NaN	NaN	NaN	NaN	NaN
NaN	NaN	NaN	NaN	NaN	NaN	NaN	NaN	NaN	NaN	NaN	NaN	NaN	NaN	NaN	NaN	NaN	NaN	NaN	NaN	NaN	NaN	NaN	NaN	NaN	NaN	NaN	NaN	NaN	NaN	NaN	NaN	NaN	NaN	NaN	NaN	NaN	NaN	NaN	NaN	NaN	NaN	NaN	NaN	NaN	NaN	NaN	NaN	NaN	NaN
NaN	NaN	NaN	NaN	NaN	NaN	NaN	NaN	NaN	NaN	NaN	NaN	NaN	NaN	NaN	NaN	NaN	NaN	NaN	NaN	NaN	NaN	NaN	NaN	NaN	NaN	NaN	NaN	NaN	NaN	NaN	NaN	NaN	NaN	NaN	NaN	NaN	NaN	NaN	NaN	NaN	NaN	NaN	NaN	NaN	NaN	NaN	NaN	NaN	NaN
NaN	NaN	NaN	NaN	NaN	NaN	NaN	NaN	NaN	NaN	NaN	NaN	NaN	NaN	NaN	NaN	NaN	NaN	NaN	NaN	NaN	NaN	NaN	NaN	NaN	NaN	NaN	NaN	NaN	NaN	NaN	NaN	NaN	NaN	NaN	NaN	NaN	NaN	NaN	NaN	NaN	NaN	NaN	NaN	NaN	NaN	NaN	NaN	NaN	NaN
NaN	NaN	NaN	NaN	NaN	NaN	NaN	NaN	NaN	NaN	NaN	NaN	NaN	NaN	NaN	NaN	NaN	NaN	NaN	NaN	NaN	NaN	NaN	NaN	NaN	NaN	NaN	NaN	NaN	NaN	NaN	NaN	NaN	NaN	NaN	NaN	NaN	NaN	NaN	NaN	NaN	NaN	NaN	NaN	NaN	NaN	NaN	NaN	NaN	NaN
NaN	NaN	NaN	NaN	NaN	NaN	NaN	NaN	NaN	NaN	NaN	NaN	NaN	NaN	NaN	NaN	NaN	NaN	NaN	NaN	NaN	NaN	NaN	NaN	NaN	NaN	NaN	NaN	NaN	NaN	NaN	NaN	NaN	NaN	NaN	NaN	NaN	NaN	NaN	NaN	NaN	NaN	NaN	NaN	NaN	NaN	NaN	NaN	NaN	NaN
NaN	NaN	NaN	NaN	NaN	NaN	NaN	NaN	NaN	NaN	NaN	NaN	NaN	NaN	NaN	NaN	NaN	NaN	NaN	NaN	NaN	NaN	NaN	NaN	NaN	NaN	NaN	NaN	NaN	NaN	NaN	NaN	NaN	NaN	NaN	NaN	NaN	NaN	NaN	NaN	NaN	NaN	NaN	NaN	NaN	NaN	NaN	NaN	NaN	NaN
NaN	NaN	NaN	NaN	NaN	NaN	NaN	NaN	NaN	NaN	NaN	NaN	NaN	NaN	NaN	NaN	NaN	NaN	NaN	NaN	NaN	NaN	NaN	NaN	NaN	NaN	NaN	NaN	NaN	NaN	NaN	NaN	NaN	NaN	NaN	NaN	NaN	NaN	NaN	NaN	NaN	NaN	NaN	NaN	NaN	NaN	NaN	NaN	NaN	NaN
NaN	NaN	NaN	NaN	NaN	NaN	NaN	NaN	NaN	NaN	NaN	NaN	NaN	NaN	NaN	NaN	NaN	NaN	NaN	NaN	NaN	NaN	NaN	NaN	NaN	NaN	NaN	NaN	NaN	NaN	NaN	NaN	NaN	NaN	NaN	NaN	NaN	NaN	NaN	NaN	NaN	NaN	NaN	NaN	NaN	NaN	NaN	NaN	NaN	NaN
5.6	5.4	NaN	NaN	NaN	7.4	5.9	5.8	NaN	NaN	5.2	NaN	5.6	5.4	NaN	5.5	NaN	NaN	NaN	NaN	NaN	6.1	5.5	5.4	5.4	5.4	5.8	5.5	NaN	NaN	5.4	5.7	5.6	5.4	NaN	NaN	NaN	NaN	5.2	5.4	NaN	5.8	5.6	NaN	NaN	NaN	5.5	NaN	NaN	6
NaN	NaN	5.1	5.1	5	NaN	NaN	NaN	NaN	NaN	NaN	5.1	NaN	NaN	NaN	NaN	NaN	NaN	5.1	4	5	NaN	5.1	5	NaN	NaN	NaN	5.1	5	5.4	NaN	NaN	5.6	NaN	5.1	NaN	NaN	NaN	5.2	NaN	NaN	5.3	NaN	NaN	NaN	NaN	5.5	NaN	5.4	NaN
4.8	6	NaN	NaN	NaN	4.2	NaN	NaN	NaN	NaN	NaN	NaN	4.3	4.6	NaN	NaN	NaN	NaN	NaN	NaN	NaN	NaN	NaN	4.7	4.7	NaN	4.2	NaN	NaN	NaN	5.7	7.4	5.1	5.1	NaN	NaN	NaN	NaN	NaN	4.4	NaN	4.6	5.2	NaN	NaN	NaN	NaN	NaN	NaN	NaN
6.5	NaN	NaN	NaN	NaN	NaN	NaN	6.6	NaN	NaN	NaN	NaN	NaN	NaN	NaN	NaN	NaN	NaN	NaN	NaN	NaN	NaN	NaN	NaN	NaN	NaN	NaN	NaN	NaN	NaN	NaN	NaN	8.5	NaN	NaN	NaN	NaN	NaN	NaN	NaN	NaN	NaN	NaN	NaN	NaN	NaN	NaN	NaN	NaN	NaN
NaN	4.1	NaN	NaN	NaN	NaN	NaN	NaN	NaN	NaN	NaN	NaN	NaN	NaN	NaN	NaN	NaN	NaN	NaN	NaN	NaN	NaN	NaN	4.3	NaN	NaN	NaN	NaN	NaN	NaN	NaN	4.1	4.2	4.4	NaN	NaN	NaN	NaN	NaN	NaN	NaN	NaN	4.3	NaN	NaN	NaN	NaN	NaN	NaN	NaN
NaN	NaN	5.3	5.1	5.3	NaN	NaN	6.4	NaN	NaN	NaN	5.1	NaN	NaN	NaN	NaN	NaN	NaN	5.4	NaN	5	NaN	5.4	NaN	NaN	NaN	NaN	5.1	5	NaN	NaN	NaN	5.9	NaN	NaN	NaN	NaN	NaN	5.3	5.9	NaN	NaN	NaN	NaN	NaN	5.7	5.5	5.8	5.4	NaN
6.2	NaN	NaN	NaN	NaN	NaN	NaN	6.6	NaN	NaN	NaN	NaN	NaN	NaN	NaN	NaN	NaN	NaN	NaN	NaN	NaN	NaN	NaN	NaN	NaN	NaN	NaN	NaN	NaN	NaN	NaN	NaN	8.5	NaN	NaN	NaN	NaN	NaN	NaN	NaN	NaN	NaN	NaN	NaN	NaN	NaN	NaN	NaN	NaN	NaN
6.2	NaN	5.1	5.1	5	5.9	5.7	5.8	NaN	NaN	5.9	5.5	NaN	NaN	5.4	5.2	5.4	NaN	7.4	NaN	5	5.9	7.8	7.5	5.8	5.8	NaN	5.1	5.8	NaN	7	7.7	5.6	5.2	5.1	5.2	5.1	5.2	5.2	6.1	5	7.1	NaN	5.1	NaN	5.7	5.5	5.8	NaN	5.8
NaN	5.4	NaN	NaN	NaN	5.2	NaN	NaN	NaN	NaN	5.2	NaN	NaN	5.1	NaN	NaN	NaN	NaN	NaN	NaN	NaN	NaN	NaN	5.8	5.4	5.6	NaN	NaN	NaN	NaN	NaN	6.4	NaN	5.4	NaN	NaN	NaN	NaN	NaN	5.3	NaN	NaN	NaN	NaN	NaN	NaN	NaN	NaN	NaN	NaN
6.2	NaN	5.2	5.1	5.1	NaN	NaN	5.9	NaN	NaN	NaN	5.6	NaN	NaN	NaN	NaN	NaN	NaN	6.7	NaN	5.1	NaN	6.8	7.4	NaN	NaN	NaN	5.3	6.9	5.4	NaN	NaN	5.6	NaN	6.2	NaN	NaN	NaN	5.4	6.5	NaN	6.7	NaN	NaN	NaN	5.7	5.5	5.8	5.4	NaN
6.2	NaN	5.2	5.1	5.4	NaN	NaN	5.8	NaN	NaN	NaN	5.6	NaN	NaN	NaN	NaN	NaN	NaN	6.6	NaN	6.2	NaN	6.5	7.3	NaN	NaN	NaN	5.1	6.4	5.4	NaN	NaN	5.6	NaN	6	NaN	NaN	NaN	5.2	6.1	NaN	6.5	NaN	NaN	NaN	5.7	5.5	5.8	5.4	NaN
6.2	NaN	5.1	5.1	5	NaN	NaN	5.8	NaN	NaN	NaN	NaN	NaN	NaN	NaN	NaN	NaN	NaN	6.1	NaN	5	NaN	6	6.3	NaN	NaN	NaN	5.1	6.4	5.4	NaN	NaN	5.6	NaN	5.8	NaN	NaN	NaN	5.5	5.9	NaN	6	NaN	NaN	NaN	5.7	5.5	5.8	5.4	NaN
NaN	NaN	5.1	5.1	5	NaN	NaN	5.8	NaN	NaN	NaN	5.1	NaN	NaN	NaN	NaN	NaN	NaN	6	NaN	5	NaN	5.5	5.4	NaN	NaN	NaN	5.1	5	5.4	NaN	NaN	5.6	NaN	5.1	NaN	NaN	NaN	5.2	5.9	NaN	6.2	NaN	NaN	NaN	5.7	5.5	5.8	5.4	NaN
NaN	NaN	5.1	5.1	5	5.3	NaN	NaN	NaN	NaN	NaN	5.1	NaN	NaN	NaN	NaN	NaN	NaN	5.5	NaN	5	NaN	5.5	5	NaN	NaN	NaN	5.1	6.2	5.4	NaN	NaN	5.6	NaN	5.7	NaN	NaN	NaN	5.7	6.8	NaN	6.3	NaN	NaN	NaN	5.7	5.5	NaN	5.4	NaN
NaN	NaN	5.1	5.1	5	NaN	NaN	5.8	NaN	NaN	NaN	5.1	NaN	NaN	NaN	NaN	NaN	NaN	5.5	NaN	5	NaN	5.1	5	NaN	NaN	NaN	5.1	6.3	5.4	NaN	NaN	5.6	NaN	6.1	NaN	NaN	NaN	5.9	6.8	NaN	6.3	NaN	NaN	NaN	5.7	5.5	5.8	5.4	NaN
6.2	NaN	5.1	5.1	5	NaN	NaN	5.8	NaN	NaN	NaN	5.1	NaN	NaN	NaN	NaN	NaN	NaN	NaN	NaN	5	NaN	5.8	6	NaN	NaN	NaN	5.1	6	5.4	NaN	NaN	5.6	NaN	5.5	NaN	NaN	NaN	5.4	5.9	NaN	5.7	NaN	NaN	NaN	5.7	5.5	5.8	5.4	NaN
NaN	NaN	5.1	5.1	5	NaN	NaN	NaN	NaN	NaN	NaN	5.1	NaN	NaN	NaN	NaN	NaN	NaN	5.1	NaN	5	NaN	5.1	5	NaN	NaN	NaN	5.1	5	NaN	NaN	NaN	NaN	NaN	5.5	NaN	NaN	NaN	NaN	NaN	NaN	6.1	NaN	NaN	NaN	NaN	NaN	NaN	NaN	NaN
6.2	NaN	5.1	5.1	5	5.9	5.7	6.2	NaN	NaN	5.9	5.3	NaN	NaN	5.1	5.2	5.2	NaN	5.1	NaN	5	5.9	5.1	5	NaN	NaN	NaN	5.1	5.8	NaN	7	7.3	5.6	5.2	5.7	5.2	5.1	5.2	5.8	5.9	5	6	NaN	5.1	5.4	5.7	5.5	5.8	5.4	5.8
6.2	NaN	5.1	5.1	5	5.9	5.7	5.8	NaN	NaN	5.9	5.2	NaN	NaN	5.1	5.2	5.2	NaN	5.1	NaN	5	5.9	5.1	5	NaN	NaN	NaN	5.1	5.8	5.4	5.1	5	5.6	5.2	5.1	5.2	5.1	5.2	5.2	5.9	5	5.2	NaN	5.1	5.4	5.7	5.5	5.8	5.4	5.8
6.2	NaN	5.1	5.1	5	5.9	5.7	5.8	NaN	NaN	5.9	5.3	NaN	NaN	5.2	5.2	5.2	NaN	5.1	NaN	5	5.9	5.1	5	NaN	NaN	NaN	5.1	5.8	NaN	5.1	5	5.6	5.3	6.1	NaN	5.1	5.2	5.2	5.9	5	5.2	NaN	5.1	NaN	7.2	5.5	6.3	5.5	5.8
6.2	NaN	5.1	5.1	5	5.9	5.7	5.8	NaN	NaN	5.9	5.3	NaN	NaN	5.1	5.2	5.2	NaN	5.1	NaN	5	5.9	5.1	5	NaN	NaN	NaN	5.1	5.8	NaN	5.1	5	5.6	5.2	6.4	5.2	5.2	5.2	5.2	5.9	5	5.2	NaN	5.1	5.4	NaN	5.5	NaN	5.4	5.8
NaN	NaN	5.1	5.1	5	5.9	NaN	5.8	NaN	NaN	5.9	5.2	NaN	NaN	5.1	5.2	5.2	NaN	5.1	NaN	5	5.9	5.1	5	NaN	NaN	NaN	5.1	5.8	NaN	5.1	5	5.6	5.2	5.5	5.2	5.1	5.2	5.2	5.9	5	6.1	NaN	5.1	NaN	5.9	5.5	6	5.4	5.8
NaN	NaN	5.1	5.1	5	NaN	NaN	NaN	NaN	NaN	NaN	5.3	NaN	NaN	5.1	5.2	5.2	NaN	5.1	NaN	5	NaN	5.1	5	NaN	NaN	NaN	5.1	NaN	NaN	5.1	5	NaN	5.2	5.9	5.2	5.1	5.2	5.2	NaN	5	5.2	NaN	5.1	5.4	6.1	NaN	NaN	5.4	NaN
NaN	NaN	5.1	5.1	5	5.9	NaN	5.8	NaN	NaN	5.9	5.2	NaN	NaN	5.1	5.2	5.2	NaN	5.1	NaN	5	5.9	5.1	5	NaN	NaN	NaN	5.1	5.8	NaN	5.1	5	5.6	5.2	5.3	5.2	5.1	5.2	5.2	5.9	5	5.2	NaN	5.1	NaN	6.1	5.5	5.8	5.4	5.8
NaN	NaN	NaN	NaN	NaN	4.1	NaN	NaN	NaN	NaN	NaN	NaN	4.3	4	NaN	NaN	NaN	NaN	NaN	NaN	NaN	NaN	NaN	4.3	NaN	NaN	4.2	NaN	NaN	NaN	NaN	5.4	4	5.3	NaN	NaN	NaN	NaN	NaN	NaN	NaN	4.1	4.7	NaN	NaN	NaN	NaN	NaN	NaN	NaN
NaN	NaN	4.1	4.1	4	4.9	NaN	NaN	NaN	NaN	NaN	NaN	NaN	NaN	NaN	NaN	NaN	NaN	NaN	NaN	NaN	NaN	NaN	NaN	NaN	NaN	NaN	4.1	NaN	NaN	NaN	NaN	4.6	NaN	NaN	NaN	NaN	NaN	NaN	NaN	NaN	NaN	NaN	NaN	NaN	4.7	NaN	4.8	NaN	NaN
6.2	NaN	5.1	5.1	5	5.9	5.7	5.8	NaN	NaN	5.9	5.1	NaN	NaN	5.1	5.2	5.3	NaN	5.1	4	5	5.9	5.1	5	NaN	NaN	NaN	5.1	5.8	NaN	6.4	6.7	5.6	5.7	6.7	5.9	5.8	6.1	5.2	5.9	5	5.4	NaN	5.1	NaN	5.7	5.5	5.8	5.4	5.8
NaN	5.4	NaN	NaN	NaN	5.2	NaN	NaN	NaN	NaN	5.2	NaN	NaN	5.4	NaN	NaN	NaN	NaN	NaN	NaN	NaN	NaN	NaN	5.5	5.4	5.4	6.1	5.5	NaN	NaN	5.7	6.5	NaN	5.4	NaN	NaN	NaN	NaN	NaN	5.3	NaN	NaN	NaN	NaN	NaN	NaN	NaN	NaN	NaN	NaN
5.6	5.8	NaN	NaN	NaN	5.2	NaN	NaN	NaN	NaN	5.2	NaN	5.6	5.4	NaN	NaN	NaN	NaN	NaN	NaN	NaN	NaN	NaN	6.4	5.4	5.4	6.9	5.5	NaN	NaN	5.4	5.6	5.8	5.4	NaN	NaN	NaN	NaN	NaN	5.3	NaN	5.7	6	NaN	NaN	NaN	NaN	NaN	NaN	NaN
NaN	NaN	NaN	NaN	NaN	NaN	NaN	NaN	NaN	NaN	NaN	NaN	NaN	NaN	NaN	NaN	NaN	NaN	NaN	NaN	NaN	NaN	NaN	6.1	NaN	NaN	NaN	NaN	NaN	NaN	NaN	5.9	NaN	NaN	NaN	NaN	NaN	NaN	NaN	NaN	NaN	NaN	NaN	NaN	NaN	NaN	NaN	NaN	NaN	NaN
NaN	NaN	NaN	NaN	NaN	NaN	NaN	NaN	NaN	NaN	NaN	NaN	NaN	NaN	NaN	NaN	NaN	NaN	NaN	NaN	NaN	NaN	NaN	NaN	NaN	NaN	NaN	NaN	NaN	NaN	NaN	NaN	NaN	NaN	NaN	NaN	NaN	NaN	NaN	NaN	NaN	NaN	NaN	NaN	NaN	NaN	NaN	NaN	NaN	NaN
5.1	5.1	NaN	NaN	NaN	5.3	NaN	NaN	NaN	NaN	NaN	NaN	5	5	NaN	NaN	NaN	NaN	NaN	4	NaN	NaN	NaN	5.5	5.3	NaN	4.2	5.8	NaN	NaN	6.6	7.3	4.9	5.5	NaN	NaN	NaN	NaN	NaN	5.7	NaN	6.2	6.6	NaN	NaN	NaN	NaN	NaN	NaN	NaN
NaN	NaN	NaN	NaN	NaN	NaN	NaN	NaN	NaN	NaN	NaN	NaN	NaN	NaN	NaN	NaN	NaN	NaN	NaN	NaN	NaN	NaN	NaN	5.8	NaN	NaN	NaN	NaN	NaN	NaN	NaN	NaN	NaN	NaN	NaN	NaN	NaN	NaN	NaN	NaN	NaN	NaN	NaN	NaN	NaN	NaN	NaN	NaN	NaN	NaN
7.3	NaN	5.1	5.1	5	NaN	5.7	7.5	NaN	NaN	6.2	5.3	NaN	NaN	5.1	5.2	5.2	NaN	5.1	NaN	5	5.9	5.1	5	NaN	NaN	NaN	5.1	5.8	NaN	5.1	5.1	8.4	5.2	5.3	5.2	5.1	5.2	5.2	5.9	5	5.2	NaN	5.1	5.4	5.7	5.5	5.8	5.4	5.8
7.3	NaN	5.1	5.1	5	NaN	5.7	6.9	NaN	NaN	6	5.3	NaN	NaN	5.1	5.6	5.2	NaN	5.1	NaN	5	5.9	5.1	5	NaN	NaN	NaN	5.1	5.8	NaN	5.1	6.2	7.3	5.2	6	5.8	6.4	5.2	5.2	5.9	5	5.3	NaN	5.1	5.4	5.7	5.5	5.8	5.4	5.8
7.9	5.9	NaN	NaN	NaN	5.3	NaN	NaN	NaN	NaN	7.9	NaN	5.6	5.4	NaN	NaN	NaN	NaN	NaN	NaN	NaN	NaN	NaN	6.1	5.5	5.7	5.8	5.5	NaN	NaN	5.4	5.6	7.1	5.4	NaN	NaN	NaN	NaN	NaN	5.3	NaN	5.7	5.8	NaN	NaN	NaN	NaN	NaN	NaN	NaN
8.7	NaN	5.1	5.1	5	NaN	6.6	7.5	NaN	NaN	NaN	5.3	NaN	NaN	5.1	5.2	5.3	NaN	5.1	NaN	5	5.9	5.1	5	NaN	NaN	NaN	5.1	5.7	5.4	5.9	7.2	8.4	5.2	5.4	5.2	5.2	NaN	5.5	5.9	5	5.3	NaN	NaN	5.4	6.6	6.5	6	5.4	NaN
NaN	NaN	5.1	5.1	5.1	5.9	6	7.9	NaN	NaN	6.9	5.5	NaN	NaN	5.1	5.2	5.2	NaN	5.1	NaN	5	5.9	5.1	5	NaN	NaN	NaN	5.1	5.8	NaN	5.1	5.4	7.5	5.2	5.4	5.2	5.1	5.2	5.2	5.9	5	5.2	NaN	5.1	5.4	5.7	7.7	5.8	5.4	5.9
6.2	NaN	5.1	5.3	5	5.9	NaN	5.8	NaN	NaN	5.9	5.3	NaN	NaN	5.1	5.2	5.2	NaN	5.1	NaN	5	5.9	5.6	5	NaN	NaN	NaN	5.1	5.8	NaN	5.4	5.9	5.6	5.2	5.1	5.2	5.1	5.2	5.2	5.9	5	5.2	NaN	5.3	NaN	5.7	5.5	5.8	5.4	NaN
6.2	NaN	5.1	5.1	5	5.9	NaN	5.8	NaN	NaN	5.9	5.3	NaN	NaN	5.1	5.2	5.2	NaN	5.1	NaN	5	5.9	5.1	5	NaN	NaN	NaN	5.1	5.8	NaN	5.1	5.3	5.6	5.2	5.1	5.2	5.1	5.2	5.2	5.9	5	5.2	NaN	5.1	NaN	5.7	5.5	5.8	5.4	NaN
NaN	5.4	NaN	NaN	NaN	5.2	NaN	NaN	NaN	NaN	5.2	NaN	NaN	5.4	NaN	NaN	NaN	NaN	NaN	NaN	NaN	NaN	NaN	5.6	5.4	5.5	NaN	6.4	NaN	NaN	5.4	6.3	NaN	5.6	NaN	NaN	NaN	NaN	NaN	5.3	NaN	6	NaN	NaN	NaN	NaN	NaN	NaN	NaN	NaN
NaN	NaN	NaN	NaN	NaN	NaN	NaN	NaN	NaN	NaN	NaN	NaN	NaN	NaN	NaN	NaN	NaN	NaN	5.6	NaN	NaN	NaN	NaN	NaN	NaN	NaN	NaN	NaN	NaN	NaN	NaN	NaN	NaN	NaN	NaN	NaN	NaN	NaN	NaN	NaN	NaN	NaN	NaN	NaN	NaN	NaN	NaN	NaN	NaN	NaN
7.3	5.5	NaN	NaN	NaN	7.9	NaN	NaN	NaN	NaN	5.2	NaN	6.3	5.6	NaN	NaN	NaN	NaN	NaN	4	NaN	NaN	NaN	5.5	5.4	5.4	7.1	7.7	NaN	NaN	5.4	5.9	5.9	5.4	NaN	NaN	NaN	NaN	NaN	8.1	NaN	5.7	6.4	NaN	NaN	NaN	NaN	NaN	NaN	NaN
6.2	NaN	5.1	5.1	5	6	6.2	6.2	NaN	NaN	5.9	5.3	NaN	NaN	5.2	5.2	5.4	NaN	5.1	4	5	5.9	5.1	5	5.8	NaN	NaN	5.1	5.8	NaN	5.1	5.9	5.6	5.2	5.4	5.2	5.1	5.2	5.4	5.9	5	6.2	NaN	5.1	NaN	5.7	5.5	5.8	NaN	5.8
6.2	NaN	5.7	5.6	6.2	5.9	NaN	5.8	NaN	NaN	5.9	5.3	NaN	NaN	5.1	5.2	5.3	NaN	6.1	NaN	7.1	5.9	6.5	6.2	NaN	NaN	NaN	7.4	6.3	NaN	6.6	7.1	5.6	5.2	5.1	5.2	5.1	5.2	5.2	5.9	5	6.8	NaN	5.1	NaN	5.7	5.5	5.8	5.4	5.8
6.2	NaN	5.3	5.1	5.1	5.9	NaN	5.8	NaN	NaN	5.9	5.3	NaN	NaN	5.1	5.2	5.2	NaN	6.1	NaN	6.4	5.9	6.7	5.6	NaN	NaN	NaN	5.1	5.8	NaN	5.2	6.5	5.6	5.2	5.1	5.2	5.1	5.2	5.2	5.9	5	6	NaN	5.1	NaN	5.7	5.5	5.8	5.4	NaN
NaN	NaN	5.1	5.1	5	5.9	NaN	5.8	NaN	NaN	5.9	5.3	NaN	NaN	5.1	5.2	5.2	NaN	5.1	NaN	5	5.9	5.1	5	NaN	NaN	NaN	5.1	5.8	NaN	5.1	6.7	5.6	5.2	5.1	5.2	5.1	5.2	5.2	5.9	5	5.2	NaN	5.1	NaN	5.7	5.5	5.8	5.4	5.8
NaN	NaN	NaN	NaN	NaN	NaN	NaN	NaN	NaN	NaN	NaN	NaN	NaN	NaN	NaN	NaN	NaN	NaN	NaN	NaN	NaN	NaN	NaN	NaN	NaN	5.6	NaN	NaN	NaN	NaN	NaN	5.7	NaN	NaN	NaN	NaN	NaN	NaN	NaN	NaN	NaN	NaN	NaN	NaN	NaN	NaN	NaN	NaN	NaN	NaN
NaN	NaN	NaN	NaN	NaN	NaN	NaN	NaN	NaN	NaN	NaN	NaN	NaN	NaN	NaN	NaN	NaN	NaN	NaN	NaN	NaN	NaN	NaN	NaN	NaN	NaN	NaN	NaN	NaN	NaN	NaN	NaN	NaN	NaN	NaN	NaN	NaN	NaN	NaN	NaN	NaN	NaN	NaN	NaN	NaN	NaN	NaN	NaN	NaN	NaN
NaN	NaN	NaN	NaN	NaN	NaN	NaN	NaN	NaN	NaN	NaN	NaN	NaN	NaN	NaN	NaN	NaN	NaN	NaN	NaN	NaN	7.2	5.1	NaN	NaN	NaN	NaN	NaN	NaN	NaN	NaN	6.8	NaN	NaN	NaN	NaN	NaN	NaN	NaN	NaN	NaN	NaN	NaN	NaN	NaN	NaN	NaN	NaN	NaN	NaN
NaN	NaN	NaN	NaN	NaN	NaN	NaN	NaN	NaN	NaN	NaN	NaN	NaN	NaN	NaN	NaN	NaN	NaN	NaN	NaN	NaN	7.3	5.1	NaN	NaN	NaN	NaN	NaN	NaN	NaN	NaN	6.8	NaN	NaN	NaN	NaN	NaN	NaN	NaN	NaN	NaN	NaN	NaN	NaN	NaN	NaN	NaN	NaN	NaN	NaN
4.3	NaN	NaN	NaN	NaN	5.2	NaN	NaN	NaN	NaN	NaN	NaN	4	NaN	NaN	NaN	NaN	NaN	NaN	4	NaN	NaN	NaN	NaN	NaN	NaN	4.2	4.9	NaN	NaN	NaN	NaN	4	NaN	NaN	NaN	NaN	NaN	NaN	4.1	NaN	4.1	4.2	NaN	NaN	NaN	NaN	NaN	NaN	NaN
6.2	NaN	5.1	5.1	5	5.9	5.7	5.8	NaN	NaN	5.9	5.3	NaN	NaN	5.1	5.2	5.2	NaN	6.8	NaN	5	5.9	7.2	6.4	NaN	NaN	NaN	5.1	5.8	NaN	5.7	6.4	5.6	5.2	5.1	5.6	5.1	5.2	5.2	6.4	5	6.5	NaN	5.1	NaN	5.7	5.5	5.8	5.4	5.8
6.2	NaN	5.1	5.1	5.1	5.9	5.7	5.8	NaN	NaN	5.9	5.3	NaN	NaN	5.1	5.2	5.2	NaN	6.4	6	5	5.9	7	6.3	NaN	NaN	NaN	5.1	5.8	NaN	5.8	6.8	5.6	5.2	5.1	7.7	5.1	5.2	5.2	6.2	5	6.1	NaN	5.1	NaN	5.7	5.5	5.8	5.4	5.8
NaN	NaN	NaN	NaN	NaN	5.2	NaN	NaN	NaN	NaN	5.2	NaN	NaN	NaN	NaN	NaN	NaN	NaN	NaN	NaN	NaN	NaN	NaN	NaN	NaN	5.6	NaN	5.7	NaN	NaN	NaN	6.3	NaN	NaN	NaN	NaN	NaN	NaN	NaN	5.3	NaN	NaN	5.9	NaN	NaN	NaN	NaN	NaN	NaN	NaN
NaN	NaN	4.7	4.7	4.6	NaN	NaN	NaN	NaN	NaN	NaN	NaN	NaN	NaN	NaN	NaN	NaN	NaN	4.7	NaN	4.6	NaN	4.7	NaN	NaN	NaN	NaN	4.7	4.6	NaN	NaN	NaN	NaN	NaN	NaN	NaN	NaN	NaN	4.8	NaN	NaN	NaN	NaN	NaN	NaN	NaN	4.7	NaN	5	NaN
NaN	NaN	NaN	NaN	NaN	NaN	NaN	NaN	NaN	NaN	NaN	NaN	NaN	NaN	NaN	NaN	NaN	NaN	NaN	NaN	NaN	8.1	5.9	NaN	NaN	NaN	NaN	NaN	NaN	NaN	NaN	8.5	NaN	NaN	NaN	NaN	NaN	NaN	NaN	NaN	NaN	NaN	NaN	NaN	NaN	NaN	NaN	NaN	NaN	NaN
6.2	NaN	5.1	5.1	5	5.9	5.7	5.8	NaN	NaN	5.9	5.2	NaN	NaN	5.1	5.2	5.2	NaN	5.1	NaN	5	5.9	5.1	5	NaN	NaN	NaN	7	5.3	5.4	5.5	5.7	6	5.2	5.1	5.2	5.1	5.2	5.2	5.9	5	5.2	NaN	5.1	5.4	5.7	5.5	5.8	5.4	6.3
6.2	NaN	5.1	5.1	5	5.9	5.7	5.8	NaN	NaN	5.9	5.2	NaN	NaN	5.1	5.2	5.2	NaN	5.1	NaN	5	5.9	5.1	5	NaN	NaN	NaN	8	5.3	5.4	5.1	5	5.6	5.2	5.1	5.2	5.1	5.2	5.2	5.9	5	5.2	NaN	5.1	5.4	5.7	5.5	5.8	5.4	5.8
6.2	NaN	5.1	5.1	5	NaN	NaN	5.8	NaN	NaN	NaN	5.1	NaN	NaN	NaN	NaN	NaN	NaN	5.1	NaN	5	NaN	5.1	5	NaN	NaN	NaN	8.2	5	5.4	NaN	NaN	6.8	NaN	5.1	NaN	NaN	NaN	5.2	5.9	NaN	5.2	NaN	NaN	NaN	5.7	5.5	5.8	5.4	NaN
6	6.2	NaN	NaN	NaN	5.2	NaN	NaN	NaN	NaN	5.2	NaN	5.6	5.4	NaN	NaN	NaN	NaN	NaN	NaN	NaN	NaN	NaN	6.4	6.6	5.4	6.5	5.5	NaN	NaN	5.8	7.2	5.6	5.4	NaN	NaN	NaN	NaN	NaN	5.3	NaN	5.7	5.6	NaN	NaN	NaN	NaN	NaN	NaN	NaN
NaN	NaN	NaN	NaN	NaN	7.4	NaN	NaN	NaN	NaN	NaN	NaN	NaN	NaN	NaN	NaN	NaN	NaN	NaN	NaN	NaN	NaN	NaN	NaN	NaN	NaN	NaN	NaN	NaN	NaN	NaN	NaN	NaN	NaN	NaN	NaN	NaN	NaN	NaN	NaN	NaN	NaN	NaN	NaN	NaN	NaN	NaN	NaN	NaN	NaN
NaN	NaN	NaN	NaN	NaN	7.8	NaN	NaN	NaN	NaN	NaN	NaN	NaN	NaN	NaN	NaN	NaN	NaN	NaN	NaN	NaN	NaN	NaN	NaN	NaN	NaN	NaN	NaN	NaN	NaN	NaN	NaN	NaN	NaN	NaN	NaN	NaN	NaN	NaN	NaN	NaN	NaN	NaN	NaN	NaN	NaN	NaN	NaN	NaN	NaN
NaN	5.4	5.1	5.1	5	5.4	NaN	5.8	NaN	NaN	5.3	5.2	5.6	5.2	5.1	5.2	5.3	NaN	5.7	NaN	5	5.9	6	6.4	6	5.4	5.8	5.1	5.8	NaN	5.3	5.6	5.6	5.3	5.1	5.2	5.1	5.2	5.2	5.4	5	5.5	6	5.1	NaN	5.7	5.5	5.8	5.4	5.8
NaN	NaN	NaN	NaN	NaN	NaN	NaN	NaN	NaN	NaN	NaN	NaN	NaN	NaN	NaN	NaN	NaN	NaN	NaN	NaN	NaN	NaN	NaN	NaN	NaN	NaN	NaN	NaN	NaN	NaN	NaN	NaN	NaN	NaN	NaN	NaN	NaN	NaN	NaN	NaN	NaN	NaN	NaN	NaN	NaN	NaN	NaN	NaN	NaN	NaN
NaN	NaN	NaN	NaN	NaN	NaN	NaN	NaN	NaN	NaN	NaN	NaN	NaN	NaN	NaN	NaN	NaN	NaN	NaN	NaN	NaN	NaN	NaN	NaN	NaN	NaN	NaN	NaN	NaN	NaN	5.8	5.6	NaN	NaN	NaN	NaN	NaN	NaN	NaN	NaN	NaN	5.6	NaN	NaN	NaN	NaN	NaN	NaN	NaN	NaN
NaN	NaN	NaN	NaN	NaN	NaN	NaN	NaN	NaN	NaN	NaN	NaN	NaN	NaN	NaN	NaN	NaN	NaN	NaN	NaN	NaN	NaN	NaN	NaN	NaN	NaN	NaN	NaN	NaN	NaN	NaN	NaN	NaN	NaN	NaN	NaN	NaN	NaN	NaN	NaN	NaN	NaN	NaN	NaN	NaN	NaN	NaN	NaN	NaN	NaN
NaN	NaN	5.1	5.1	5	NaN	6.4	5.9	NaN	NaN	NaN	5.3	NaN	NaN	5.2	5.2	5.3	NaN	5.1	NaN	5	6.1	5.1	5	NaN	NaN	NaN	5.1	NaN	NaN	5.1	5	5.6	5.2	5.1	5.2	5.1	5.2	5.2	NaN	5	5.2	NaN	5.1	5.6	NaN	5.5	NaN	5.4	NaN
NaN	NaN	5.1	5.1	5	NaN	6.2	NaN	NaN	NaN	NaN	NaN	NaN	NaN	5.1	5.2	5.2	NaN	5.1	NaN	5	NaN	5.1	5	NaN	NaN	NaN	5.1	NaN	NaN	5.1	5	NaN	5.2	5.1	5.2	5.1	5.2	5.2	NaN	5	5.2	NaN	5.1	5.6	NaN	NaN	NaN	NaN	NaN
NaN	NaN	NaN	5.1	5	NaN	NaN	NaN	NaN	NaN	NaN	5.6	NaN	NaN	5.7	5.7	5.7	NaN	5.1	NaN	5	NaN	5.1	5	NaN	NaN	NaN	5.1	NaN	NaN	5.1	5	NaN	5.2	5.1	5.2	5.1	5.2	5.2	NaN	5	5.2	NaN	5.1	NaN	NaN	NaN	6.5	5.4	NaN
NaN	NaN	NaN	5.1	5	NaN	NaN	NaN	NaN	NaN	NaN	NaN	NaN	NaN	5.7	5.7	5.7	NaN	5.1	NaN	5.5	NaN	5.1	5	NaN	NaN	NaN	5.1	6	NaN	5.6	5	NaN	5.3	5.1	5.2	5.1	5.2	5.2	6.4	5	5.2	NaN	5.1	NaN	NaN	NaN	NaN	NaN	NaN
NaN	NaN	NaN	NaN	NaN	NaN	NaN	NaN	NaN	NaN	NaN	NaN	NaN	NaN	5.3	NaN	5.4	NaN	NaN	NaN	NaN	NaN	NaN	NaN	NaN	NaN	NaN	NaN	NaN	NaN	NaN	NaN	NaN	NaN	NaN	NaN	NaN	NaN	NaN	NaN	NaN	NaN	NaN	NaN	NaN	NaN	NaN	NaN	NaN	NaN
NaN	NaN	NaN	NaN	NaN	NaN	NaN	NaN	NaN	NaN	NaN	NaN	NaN	NaN	5.2	NaN	NaN	NaN	NaN	NaN	NaN	NaN	NaN	NaN	NaN	NaN	NaN	NaN	NaN	NaN	NaN	NaN	NaN	NaN	NaN	NaN	NaN	NaN	NaN	NaN	NaN	NaN	NaN	NaN	NaN	NaN	NaN	NaN	NaN	NaN
NaN	NaN	5.1	5.1	5	5.9	5.7	5.8	NaN	NaN	NaN	5.3	NaN	NaN	5.1	5.2	5.2	NaN	5.1	NaN	5	NaN	5.1	5	NaN	NaN	NaN	5.1	5.8	NaN	5.1	5	5.6	5.8	5.3	5.2	5.1	5.2	5.2	5.9	5	5.5	NaN	5.1	5.4	6.9	5.5	5.8	5.4	5.8
NaN	NaN	NaN	5.1	NaN	NaN	NaN	NaN	NaN	NaN	NaN	NaN	NaN	NaN	NaN	NaN	NaN	NaN	NaN	NaN	NaN	NaN	NaN	NaN	NaN	NaN	NaN	NaN	NaN	NaN	5.2	5.5	NaN	NaN	NaN	NaN	NaN	NaN	NaN	NaN	NaN	5.3	NaN	NaN	NaN	NaN	NaN	NaN	NaN	NaN
NaN	5.4	NaN	NaN	NaN	5.2	NaN	NaN	NaN	NaN	5.2	NaN	NaN	5.4	NaN	NaN	NaN	NaN	NaN	4	NaN	NaN	NaN	5.5	5.4	5.5	NaN	6.1	NaN	NaN	5.4	6.5	NaN	5.4	NaN	NaN	NaN	NaN	NaN	5.3	NaN	NaN	6	NaN	NaN	NaN	NaN	NaN	NaN	NaN
6.2	NaN	5.3	5.1	5	NaN	NaN	5.8	NaN	NaN	NaN	5.1	NaN	NaN	NaN	NaN	NaN	NaN	5.1	NaN	5	NaN	5.1	5	NaN	NaN	NaN	5.1	5	5.4	NaN	NaN	5.8	NaN	5.1	NaN	NaN	NaN	5.5	5.9	NaN	5.2	NaN	NaN	NaN	5.7	5.1	5.8	5.4	NaN
NaN	NaN	5.1	5.1	5	NaN	NaN	NaN	NaN	NaN	NaN	5.2	NaN	NaN	5.1	5.2	5.2	NaN	5.1	4	5	NaN	5.1	5	NaN	NaN	NaN	5.1	NaN	NaN	5.1	5.3	NaN	5.2	5.1	5.2	5.1	5.2	5.2	NaN	5	5.9	NaN	5.1	NaN	NaN	NaN	NaN	NaN	NaN
NaN	NaN	5.1	5.1	5	NaN	NaN	5.8	NaN	NaN	NaN	5.1	NaN	NaN	NaN	NaN	NaN	NaN	5.1	NaN	5	NaN	NaN	5	NaN	NaN	NaN	5.1	5	5.4	NaN	NaN	5.6	NaN	5.1	NaN	NaN	NaN	5.7	5.9	NaN	5.7	NaN	NaN	NaN	5.7	5.5	5.8	5.4	NaN
NaN	NaN	5.1	5.1	5	NaN	NaN	NaN	NaN	NaN	NaN	5.2	NaN	NaN	5.1	5.2	5.2	NaN	5.1	NaN	5	NaN	5.1	5	NaN	NaN	NaN	5.1	NaN	NaN	5.1	5	NaN	5.2	5.1	5.2	5.1	5.2	5.2	NaN	5	5.2	NaN	5.1	5.4	NaN	5.5	NaN	5.4	NaN
NaN	NaN	NaN	NaN	NaN	NaN	NaN	NaN	NaN	NaN	NaN	NaN	NaN	NaN	NaN	NaN	NaN	NaN	NaN	NaN	NaN	NaN	NaN	NaN	NaN	NaN	NaN	NaN	NaN	NaN	NaN	NaN	NaN	NaN	NaN	NaN	NaN	NaN	NaN	NaN	NaN	NaN	NaN	NaN	NaN	NaN	NaN	NaN	NaN	NaN
4.4	NaN	NaN	NaN	NaN	4.2	NaN	NaN	NaN	NaN	NaN	NaN	4	NaN	NaN	NaN	NaN	NaN	NaN	4	NaN	NaN	NaN	NaN	NaN	NaN	5.4	NaN	NaN	NaN	NaN	NaN	5.2	NaN	NaN	NaN	NaN	NaN	NaN	4.9	NaN	4.1	4	NaN	NaN	NaN	NaN	NaN	NaN	NaN
6.2	NaN	5.1	5.1	5	NaN	NaN	5.8	NaN	NaN	NaN	5.1	NaN	NaN	NaN	NaN	NaN	NaN	NaN	NaN	5	NaN	5.1	5	NaN	NaN	NaN	5.1	5	5.4	NaN	NaN	5.6	NaN	5.1	NaN	NaN	NaN	5.2	5.9	NaN	5.2	NaN	NaN	NaN	5.7	5.5	5.8	5.4	NaN
4	4.3	NaN	NaN	NaN	4.6	NaN	NaN	NaN	NaN	NaN	NaN	4	NaN	NaN	NaN	NaN	NaN	NaN	NaN	NaN	NaN	NaN	4.4	4.2	4.7	4.4	NaN	NaN	NaN	4.2	5.4	4.1	5.2	NaN	NaN	NaN	NaN	NaN	4.3	NaN	4.4	4.7	NaN	NaN	NaN	NaN	NaN	NaN	NaN
7.3	NaN	5.1	5.1	5	5.9	6.2	6.4	NaN	NaN	5.9	5.3	NaN	NaN	5.4	5.6	5.5	NaN	6.5	4	5.2	5.9	5.9	5.6	NaN	NaN	NaN	5.4	5.8	NaN	5.9	7.1	5.6	5.2	5.6	5.2	5.6	5.4	5.8	5.9	5	6.7	NaN	5.1	5.4	5.7	5.5	5.8	5.4	6.1
NaN	NaN	NaN	NaN	NaN	NaN	NaN	NaN	NaN	NaN	NaN	NaN	NaN	NaN	NaN	NaN	NaN	NaN	NaN	NaN	NaN	NaN	NaN	NaN	NaN	NaN	NaN	NaN	NaN	NaN	NaN	NaN	NaN	NaN	NaN	NaN	NaN	NaN	NaN	NaN	NaN	NaN	NaN	NaN	NaN	NaN	NaN	NaN	NaN	NaN
NaN	NaN	6.4	5.7	6.4	NaN	NaN	NaN	NaN	NaN	NaN	5.2	NaN	NaN	NaN	NaN	NaN	NaN	5.9	NaN	6.3	NaN	6	5.8	NaN	NaN	NaN	5.2	5.8	5.4	NaN	NaN	5.6	NaN	5.1	NaN	NaN	NaN	5.2	6.6	NaN	5.2	NaN	NaN	NaN	NaN	5.5	NaN	5.4	NaN
NaN	NaN	NaN	NaN	NaN	NaN	NaN	NaN	NaN	NaN	NaN	NaN	NaN	NaN	NaN	NaN	NaN	NaN	NaN	NaN	NaN	NaN	NaN	NaN	NaN	NaN	NaN	NaN	NaN	NaN	NaN	NaN	NaN	NaN	NaN	NaN	NaN	NaN	NaN	NaN	NaN	NaN	NaN	NaN	NaN	NaN	NaN	NaN	NaN	NaN
5.6	5.4	NaN	NaN	NaN	5.7	NaN	NaN	NaN	NaN	5.2	NaN	6.4	5.8	NaN	NaN	NaN	NaN	NaN	4	NaN	NaN	NaN	5.5	5.4	5.9	NaN	5.5	NaN	NaN	5.4	5.6	6.4	5.4	NaN	NaN	NaN	NaN	NaN	5.3	NaN	NaN	6.1	NaN	NaN	NaN	NaN	NaN	NaN	NaN
NaN	NaN	NaN	NaN	NaN	5.4	NaN	NaN	NaN	NaN	NaN	NaN	NaN	NaN	NaN	NaN	NaN	NaN	NaN	4	NaN	NaN	NaN	NaN	NaN	NaN	NaN	NaN	NaN	NaN	NaN	NaN	NaN	NaN	NaN	NaN	NaN	NaN	NaN	NaN	NaN	NaN	NaN	NaN	NaN	NaN	NaN	NaN	NaN	NaN
4.3	4.2	NaN	NaN	NaN	4.3	NaN	NaN	NaN	NaN	NaN	NaN	4.2	NaN	NaN	NaN	NaN	NaN	NaN	NaN	NaN	NaN	NaN	NaN	NaN	4.5	4.2	NaN	NaN	NaN	NaN	5.3	4.2	NaN	NaN	NaN	NaN	NaN	NaN	4.1	NaN	4.1	4.5	NaN	NaN	NaN	NaN	NaN	NaN	NaN
NaN	NaN	NaN	NaN	NaN	4	NaN	NaN	NaN	NaN	NaN	NaN	4	NaN	NaN	NaN	NaN	NaN	NaN	4	NaN	NaN	NaN	NaN	NaN	NaN	4.2	NaN	NaN	NaN	NaN	6.1	4	NaN	NaN	NaN	NaN	NaN	NaN	NaN	NaN	4.7	4.8	NaN	NaN	NaN	NaN	NaN	NaN	NaN
NaN	NaN	NaN	NaN	NaN	NaN	NaN	NaN	NaN	NaN	NaN	NaN	NaN	NaN	NaN	NaN	NaN	NaN	NaN	NaN	NaN	NaN	NaN	NaN	NaN	NaN	NaN	NaN	NaN	NaN	NaN	NaN	NaN	NaN	NaN	NaN	NaN	NaN	5.4	NaN	NaN	NaN	NaN	NaN	NaN	NaN	NaN	NaN	NaN	NaN
6.2	NaN	6.2	5.5	5.3	5.9	5.7	5.8	NaN	NaN	5.9	5.3	NaN	NaN	5.1	5.2	5.2	NaN	5.1	NaN	5.3	5.9	5.1	5.3	NaN	NaN	NaN	5.1	5.8	NaN	5.1	6	5.6	5.2	5.1	5.2	5.1	5.2	5.2	5.9	5	5.7	NaN	5.1	5.4	5.7	5.5	5.8	5.4	5.8
NaN	NaN	NaN	5.1	5	6.5	NaN	5.8	NaN	NaN	NaN	5.8	NaN	NaN	5.7	6.7	6.9	NaN	7.3	NaN	5	7.4	7.6	7.3	NaN	5.4	NaN	5.6	6.6	NaN	7.3	8.3	5.6	5.2	5.3	5.9	6.4	5.2	7.4	6.9	5.3	6.7	NaN	5.5	NaN	6.4	7	5.8	6.3	7.3
NaN	NaN	NaN	5.1	5	7.1	NaN	5.8	NaN	NaN	NaN	5.4	NaN	NaN	5.8	6.3	6.5	NaN	6.7	NaN	5	5.9	7	7.1	NaN	NaN	NaN	5.1	5.8	NaN	6.7	7	5.6	5.2	5.1	5.4	5.6	5.2	5.3	5.9	5.6	5.8	NaN	5.1	NaN	5.9	6.7	5.8	5.6	6
NaN	NaN	5.1	5.1	5	5.9	5.7	5.8	NaN	NaN	5.9	5.3	NaN	NaN	5.1	5.2	5.2	NaN	5.1	NaN	5.1	5.9	5.1	5	NaN	NaN	NaN	5.1	5.8	NaN	5.1	5	5.6	5.5	7.1	5.2	5.1	5.2	5.2	5.9	5	5.2	NaN	5.1	NaN	5.7	5.5	5.8	5.4	5.8
NaN	NaN	5.1	5.1	5	NaN	5.7	NaN	NaN	NaN	NaN	5.3	NaN	NaN	5.1	5.2	5.2	NaN	5.1	NaN	5	NaN	5.1	5	NaN	NaN	NaN	5.1	NaN	NaN	5.1	5	5.6	6.1	6.8	5.2	5.1	5.2	5.2	NaN	5	5.2	NaN	5.1	5.4	5.7	5.5	NaN	5.4	NaN
6.3	NaN	5.7	5.1	5	5.9	7.3	6.3	NaN	NaN	NaN	5.2	NaN	NaN	NaN	NaN	NaN	NaN	6.6	4	5.1	7	5.8	5.9	NaN	NaN	NaN	6.3	7.8	6.9	7.6	8.2	6.2	7.3	7.5	NaN	8.4	NaN	6.4	7.7	5	NaN	NaN	NaN	5.4	6.4	5.1	5.8	5.4	NaN
6.2	NaN	6.1	5.9	5.9	NaN	5.7	5.8	NaN	NaN	5.9	5.3	NaN	NaN	5.1	5.2	5.2	NaN	5.1	NaN	6.9	5.9	5.1	5	NaN	NaN	NaN	6.4	7.1	NaN	5.3	6.9	5.6	5.2	5.1	6.8	6.6	6.9	5.2	5.9	5	5.7	NaN	5.1	5.4	5.7	5.5	5.8	5.4	5.8
NaN	NaN	5.1	5.4	5	NaN	NaN	NaN	NaN	NaN	6.3	5.3	NaN	NaN	5.5	5.8	5.9	NaN	5.1	4	5	6.5	5.1	5.2	NaN	NaN	NaN	5.1	NaN	NaN	5.2	6	NaN	5.2	5.1	5.2	5.6	5.7	6.2	NaN	5	5.8	NaN	5.1	5.8	NaN	5.5	NaN	5.4	NaN
NaN	NaN	5.1	5.1	5	NaN	NaN	NaN	NaN	NaN	NaN	NaN	NaN	NaN	5.1	5.2	5.2	NaN	5.1	NaN	6.1	NaN	5.1	5	NaN	NaN	NaN	5.1	NaN	NaN	5.1	5	NaN	5.2	5.1	5.2	5.1	5.4	5.2	NaN	5	5.2	NaN	5.1	NaN	NaN	NaN	6.1	NaN	NaN
6.2	NaN	5.1	5.1	5	NaN	NaN	5.8	NaN	NaN	NaN	NaN	NaN	NaN	NaN	NaN	NaN	NaN	5.1	NaN	5	NaN	5.1	5	NaN	NaN	NaN	5.1	6.6	5.4	NaN	NaN	5.6	NaN	5.1	NaN	NaN	NaN	5.2	5.9	NaN	5.4	NaN	NaN	NaN	5.7	5.5	5.8	5.4	NaN
NaN	NaN	5.1	5.1	5	NaN	5.7	5.8	NaN	NaN	5.9	5.3	NaN	NaN	5.1	5.2	5.2	NaN	5.1	NaN	5	5.9	5.1	5	NaN	NaN	NaN	5.1	5.8	NaN	5.5	6.3	5.6	5.2	5.1	5.3	5.1	5.2	5.2	5.9	5	5.2	NaN	5.1	6	5.7	5.5	5.8	5.4	5.8
8	6.8	NaN	NaN	NaN	7.2	NaN	NaN	NaN	NaN	6.2	NaN	NaN	NaN	NaN	NaN	NaN	NaN	NaN	NaN	NaN	NaN	NaN	NaN	NaN	NaN	NaN	NaN	NaN	NaN	NaN	8.4	7.4	NaN	NaN	NaN	NaN	NaN	NaN	NaN	NaN	6.4	NaN	NaN	NaN	NaN	NaN	NaN	NaN	NaN
4.1	NaN	NaN	NaN	NaN	NaN	NaN	NaN	NaN	NaN	NaN	NaN	4.2	4.1	NaN	NaN	NaN	NaN	NaN	NaN	NaN	NaN	NaN	4.3	4.2	NaN	4.3	NaN	NaN	NaN	4.7	5.6	4.2	4.3	NaN	NaN	NaN	NaN	NaN	4.2	NaN	4.7	4.7	NaN	NaN	NaN	NaN	NaN	NaN	NaN
NaN	4.9	NaN	NaN	NaN	5.3	NaN	NaN	NaN	NaN	4.3	NaN	5.2	4.8	NaN	NaN	NaN	NaN	NaN	4	NaN	NaN	NaN	NaN	5.2	4.3	4.2	NaN	NaN	NaN	5.7	7.1	5.5	4.7	NaN	NaN	NaN	NaN	NaN	5.5	NaN	5.4	6.1	NaN	NaN	NaN	NaN	NaN	NaN	NaN
NaN	NaN	NaN	NaN	NaN	NaN	NaN	NaN	NaN	NaN	NaN	NaN	NaN	NaN	NaN	NaN	NaN	NaN	NaN	NaN	NaN	NaN	NaN	NaN	NaN	NaN	NaN	NaN	NaN	NaN	NaN	NaN	NaN	NaN	NaN	NaN	NaN	NaN	NaN	NaN	NaN	NaN	NaN	NaN	NaN	NaN	NaN	NaN	NaN	NaN
NaN	NaN	5.1	5.1	5	5.9	5.7	5.8	NaN	NaN	5.9	5.3	NaN	NaN	5.1	5.2	5.2	NaN	5.1	NaN	5	5.9	5.1	5	NaN	NaN	NaN	5.1	5.8	NaN	5.6	6.1	5.6	5.6	5.1	5.2	5.1	5.2	6.3	6.3	5	5.3	NaN	6.1	5.4	5.7	5.5	5.8	5.4	5.8
NaN	NaN	5.1	5.1	5	NaN	NaN	5.8	NaN	NaN	NaN	5.1	NaN	NaN	NaN	NaN	NaN	NaN	NaN	NaN	5	NaN	5.1	5	NaN	NaN	NaN	5.1	5	5.4	NaN	NaN	5.6	NaN	5.1	NaN	NaN	NaN	5.2	5.9	NaN	5.2	NaN	NaN	NaN	5.7	5.5	5.8	5.4	NaN
NaN	NaN	5.1	5.1	5	NaN	NaN	NaN	NaN	NaN	NaN	5.2	NaN	NaN	5.1	5.2	5.2	NaN	5.1	NaN	5	NaN	5.1	5	NaN	NaN	NaN	5.1	NaN	NaN	5.1	5.7	NaN	5.2	5.3	5.2	5.1	5.2	6.3	NaN	5	5.7	NaN	5.1	NaN	NaN	NaN	NaN	NaN	NaN
NaN	NaN	NaN	NaN	NaN	NaN	NaN	NaN	NaN	NaN	NaN	NaN	NaN	NaN	NaN	NaN	NaN	NaN	NaN	NaN	NaN	NaN	NaN	NaN	NaN	NaN	NaN	NaN	NaN	NaN	NaN	NaN	NaN	NaN	NaN	NaN	NaN	NaN	NaN	NaN	NaN	NaN	NaN	NaN	NaN	NaN	NaN	NaN	NaN	NaN
NaN	NaN	5.1	5.1	5.1	NaN	5.7	5.8	NaN	NaN	5.9	5.8	NaN	NaN	5.4	5.8	5.7	NaN	6.3	NaN	5	6.5	6.3	5.7	NaN	NaN	NaN	5.1	5.8	NaN	6.3	7.1	5.7	5.3	6.2	5.3	5.2	5.2	5.9	5.9	5	6.9	NaN	5.1	5.5	5.7	5.5	5.8	5.4	5.8
6.2	NaN	5.1	5.1	5	5.9	5.7	5.8	NaN	NaN	5.9	5.3	NaN	NaN	5.2	5.5	5.3	NaN	5.2	NaN	5	5.9	5.2	5	5.8	NaN	NaN	5.1	5.8	NaN	5.1	6.1	5.6	5.2	5.1	5.2	5.1	5.2	7.3	6.6	5	6.6	NaN	5.1	NaN	5.7	5.5	5.8	NaN	5.8
NaN	NaN	4.1	4.1	4	NaN	NaN	NaN	NaN	NaN	NaN	NaN	4	NaN	NaN	NaN	NaN	NaN	NaN	NaN	NaN	NaN	NaN	4.1	NaN	4.6	4.2	4.1	NaN	NaN	NaN	5.5	4.2	4.3	NaN	NaN	NaN	NaN	NaN	4.3	NaN	4.6	4.9	NaN	NaN	NaN	NaN	NaN	NaN	NaN
NaN	NaN	NaN	NaN	NaN	NaN	NaN	NaN	NaN	NaN	NaN	NaN	NaN	NaN	NaN	NaN	NaN	NaN	NaN	NaN	NaN	NaN	NaN	NaN	NaN	NaN	NaN	NaN	NaN	NaN	NaN	5.7	NaN	NaN	NaN	NaN	NaN	NaN	NaN	NaN	NaN	NaN	NaN	NaN	NaN	NaN	NaN	NaN	NaN	NaN
NaN	NaN	NaN	NaN	NaN	NaN	NaN	NaN	NaN	NaN	NaN	NaN	NaN	NaN	NaN	NaN	NaN	NaN	NaN	NaN	NaN	NaN	NaN	NaN	5.8	5.7	5.8	5.7	NaN	NaN	NaN	5.8	NaN	NaN	NaN	NaN	NaN	NaN	NaN	NaN	NaN	NaN	NaN	NaN	NaN	NaN	NaN	NaN	NaN	NaN
7	NaN	5.1	5.1	5	5.9	6.4	5.9	NaN	NaN	5.9	5.3	NaN	NaN	5.3	5.2	5.2	NaN	5.1	4	5	5.9	5.1	5	NaN	NaN	NaN	5.1	5.8	NaN	5.1	5.2	6.4	5.2	5.1	5.2	5.7	5.2	5.2	5.9	5	5.2	NaN	5.1	5.4	5.7	7.3	5.8	5.4	5.8
NaN	NaN	5.1	5.1	5	NaN	NaN	NaN	NaN	NaN	NaN	5.3	NaN	NaN	5.1	5.2	5.2	NaN	5.1	NaN	5	NaN	5.1	5	NaN	NaN	NaN	5.1	NaN	NaN	6	6.3	NaN	5.2	5.8	5.2	5.1	5.2	5.2	NaN	5	5.2	NaN	5.1	NaN	NaN	NaN	NaN	NaN	NaN
5.7	7	NaN	NaN	NaN	5.3	NaN	NaN	NaN	NaN	5.2	NaN	5.6	5.1	NaN	NaN	NaN	NaN	NaN	NaN	NaN	NaN	NaN	6.7	5.5	6.7	6.1	5.5	NaN	NaN	5.4	6.6	5.6	6.4	NaN	NaN	NaN	NaN	NaN	5.3	NaN	5.7	5.6	NaN	NaN	NaN	NaN	NaN	NaN	NaN
6.1	5.4	NaN	NaN	NaN	5.2	NaN	NaN	NaN	NaN	5.2	NaN	5.6	5.1	NaN	NaN	NaN	NaN	NaN	NaN	NaN	NaN	NaN	8.1	6.8	5.4	5.8	5.5	NaN	NaN	5.4	7	5.6	5.4	NaN	NaN	NaN	NaN	NaN	5.3	NaN	5.7	5.6	NaN	NaN	NaN	NaN	NaN	NaN	NaN
NaN	NaN	NaN	NaN	NaN	NaN	NaN	NaN	NaN	NaN	NaN	NaN	NaN	NaN	NaN	NaN	NaN	NaN	NaN	NaN	NaN	NaN	NaN	NaN	NaN	5.5	NaN	NaN	NaN	NaN	NaN	NaN	NaN	NaN	NaN	NaN	NaN	NaN	NaN	NaN	NaN	NaN	NaN	NaN	NaN	NaN	NaN	NaN	NaN	NaN
6.7	5.4	NaN	NaN	NaN	5.5	NaN	NaN	NaN	NaN	5.6	NaN	5.6	5.4	NaN	NaN	NaN	NaN	NaN	NaN	NaN	NaN	NaN	6.5	6.7	5.4	5.8	5.5	NaN	NaN	5.6	6.6	5.8	5.4	NaN	NaN	NaN	NaN	NaN	5.3	NaN	5.7	5.9	NaN	NaN	NaN	NaN	NaN	NaN	NaN
NaN	NaN	NaN	NaN	NaN	NaN	NaN	NaN	NaN	NaN	NaN	NaN	NaN	NaN	NaN	NaN	NaN	NaN	NaN	4	NaN	6.8	NaN	NaN	NaN	NaN	NaN	NaN	NaN	NaN	NaN	NaN	NaN	NaN	NaN	NaN	NaN	NaN	NaN	NaN	NaN	NaN	NaN	NaN	NaN	NaN	NaN	NaN	NaN	NaN
4.6	5.5	4.1	4.1	4	4.9	NaN	NaN	NaN	NaN	NaN	NaN	4	NaN	NaN	NaN	NaN	NaN	NaN	4	NaN	NaN	NaN	4.2	NaN	5.2	4.2	4.1	NaN	NaN	NaN	4.9	4.2	6	NaN	NaN	NaN	NaN	NaN	NaN	NaN	4.1	4.1	NaN	NaN	4.7	NaN	4.8	NaN	NaN
5.6	5.4	NaN	NaN	NaN	5.3	NaN	NaN	NaN	NaN	5.2	NaN	5.6	5.4	NaN	NaN	NaN	NaN	NaN	NaN	NaN	NaN	NaN	5.5	5.4	7.7	5.8	5.5	NaN	NaN	5.4	5.6	7.8	5.4	NaN	NaN	NaN	NaN	NaN	5.3	NaN	5.7	5.6	NaN	NaN	NaN	NaN	NaN	NaN	NaN
5.6	5.4	NaN	NaN	NaN	5.2	NaN	NaN	NaN	NaN	5.2	NaN	5.6	5.4	NaN	NaN	NaN	NaN	NaN	NaN	NaN	NaN	NaN	5.5	5.4	6.8	5.8	5.5	NaN	NaN	5.4	5.6	5.6	5.4	NaN	NaN	NaN	NaN	NaN	5.3	NaN	5.7	5.6	NaN	NaN	NaN	NaN	NaN	NaN	NaN
5.4	5.4	NaN	NaN	NaN	5.2	NaN	NaN	NaN	NaN	5.2	NaN	NaN	5.1	NaN	NaN	NaN	NaN	NaN	NaN	NaN	NaN	NaN	NaN	NaN	5.4	NaN	NaN	NaN	NaN	NaN	NaN	NaN	5.4	NaN	NaN	NaN	NaN	NaN	5.3	NaN	NaN	NaN	NaN	NaN	NaN	NaN	NaN	NaN	NaN
5.6	5.4	NaN	NaN	NaN	5.2	NaN	NaN	NaN	NaN	5.2	NaN	5.6	5.4	NaN	NaN	NaN	NaN	NaN	NaN	NaN	NaN	NaN	5.5	5.4	5.4	5.8	5.5	NaN	NaN	5.4	5.6	5.6	5.4	NaN	NaN	NaN	NaN	NaN	5.3	NaN	5.7	5.6	NaN	NaN	NaN	NaN	NaN	NaN	NaN
NaN	NaN	NaN	NaN	NaN	NaN	5.8	NaN	NaN	NaN	NaN	NaN	NaN	NaN	NaN	NaN	NaN	NaN	NaN	NaN	NaN	NaN	NaN	NaN	NaN	NaN	NaN	NaN	NaN	NaN	NaN	5.2	NaN	NaN	NaN	NaN	NaN	NaN	NaN	NaN	NaN	NaN	NaN	NaN	NaN	NaN	NaN	NaN	NaN	NaN
NaN	NaN	NaN	NaN	NaN	NaN	NaN	NaN	NaN	NaN	NaN	NaN	NaN	NaN	NaN	NaN	NaN	NaN	NaN	NaN	NaN	NaN	NaN	NaN	NaN	NaN	NaN	NaN	NaN	NaN	NaN	5.2	NaN	NaN	NaN	5.4	NaN	NaN	NaN	NaN	NaN	NaN	NaN	NaN	NaN	NaN	NaN	NaN	NaN	NaN
NaN	NaN	NaN	NaN	NaN	NaN	NaN	NaN	NaN	NaN	NaN	NaN	NaN	NaN	NaN	NaN	NaN	NaN	NaN	4	NaN	NaN	NaN	NaN	NaN	NaN	NaN	NaN	NaN	NaN	NaN	5.4	NaN	NaN	NaN	NaN	NaN	NaN	NaN	NaN	NaN	NaN	NaN	NaN	NaN	NaN	NaN	NaN	NaN	NaN
6.2	NaN	5.1	5.1	5	NaN	5.7	6.1	NaN	NaN	5.9	5.3	NaN	NaN	5.2	5.8	5.5	NaN	5.8	NaN	6.1	5.9	6.2	5.8	NaN	NaN	NaN	5.1	5.8	NaN	6.2	6.8	5.6	5.2	5.9	5.2	5.1	5.2	5.2	5.9	5	5.7	NaN	5.1	5.4	NaN	5.5	NaN	5.4	5.8
NaN	NaN	NaN	NaN	NaN	NaN	NaN	NaN	NaN	NaN	NaN	NaN	NaN	NaN	5.3	5.3	5.4	NaN	NaN	NaN	NaN	NaN	NaN	NaN	NaN	NaN	NaN	NaN	NaN	NaN	NaN	NaN	NaN	NaN	NaN	NaN	NaN	NaN	NaN	NaN	NaN	NaN	NaN	NaN	NaN	NaN	NaN	NaN	NaN	NaN
6.2	NaN	5.1	5.1	5	NaN	NaN	5.8	NaN	NaN	NaN	5.1	NaN	NaN	NaN	NaN	NaN	NaN	5.4	NaN	6.6	NaN	5.4	5.3	NaN	NaN	NaN	5.1	5	5.4	NaN	NaN	5.6	NaN	5.2	NaN	NaN	NaN	5.2	5.9	NaN	5.2	NaN	NaN	NaN	5.7	5.5	5.8	5.4	NaN
NaN	NaN	NaN	NaN	NaN	NaN	NaN	NaN	NaN	NaN	NaN	NaN	NaN	NaN	NaN	NaN	NaN	NaN	NaN	NaN	NaN	8.2	6.2	NaN	NaN	NaN	NaN	NaN	NaN	NaN	NaN	8	NaN	NaN	NaN	NaN	NaN	NaN	NaN	NaN	NaN	NaN	NaN	NaN	NaN	NaN	NaN	NaN	NaN	NaN
NaN	NaN	NaN	NaN	NaN	NaN	NaN	NaN	NaN	NaN	NaN	NaN	NaN	NaN	NaN	NaN	NaN	NaN	NaN	NaN	NaN	NaN	NaN	NaN	NaN	5.5	NaN	NaN	NaN	NaN	NaN	NaN	NaN	NaN	NaN	NaN	NaN	NaN	NaN	NaN	NaN	NaN	NaN	NaN	NaN	NaN	NaN	NaN	NaN	NaN
NaN	NaN	NaN	NaN	NaN	NaN	NaN	NaN	NaN	NaN	NaN	NaN	NaN	NaN	5.2	NaN	NaN	NaN	NaN	NaN	NaN	NaN	5.1	NaN	NaN	NaN	NaN	NaN	NaN	NaN	NaN	NaN	NaN	NaN	NaN	NaN	NaN	NaN	NaN	NaN	NaN	5.6	NaN	NaN	NaN	NaN	NaN	NaN	NaN	NaN
NaN	NaN	6.4	6.1	6.4	NaN	NaN	NaN	NaN	NaN	NaN	5.5	NaN	NaN	NaN	NaN	NaN	NaN	6.2	NaN	6.5	NaN	6.3	5.7	NaN	NaN	NaN	6.1	6.1	6.3	NaN	NaN	5.6	NaN	5.1	NaN	NaN	NaN	5.2	6.8	NaN	5.2	NaN	NaN	NaN	5.7	5.5	NaN	5.4	NaN
6.2	6.3	NaN	NaN	NaN	6	NaN	NaN	NaN	NaN	6.1	NaN	6.3	6.3	NaN	NaN	NaN	NaN	NaN	NaN	NaN	NaN	NaN	7.1	6	6	7	9	NaN	NaN	5.4	7.6	5.9	5.9	NaN	NaN	NaN	NaN	NaN	6.1	NaN	7.2	6.8	NaN	NaN	NaN	NaN	NaN	NaN	NaN
NaN	NaN	4.1	4.1	4	4.9	NaN	NaN	NaN	NaN	NaN	NaN	NaN	NaN	NaN	NaN	NaN	NaN	NaN	NaN	NaN	NaN	NaN	NaN	NaN	NaN	NaN	4.1	NaN	NaN	NaN	NaN	4.6	NaN	NaN	NaN	NaN	NaN	NaN	NaN	NaN	NaN	NaN	NaN	NaN	NaN	NaN	NaN	NaN	NaN
NaN	NaN	5.1	5.1	5	NaN	NaN	NaN	NaN	NaN	NaN	5.3	NaN	NaN	5.4	5.8	5.6	NaN	6.6	NaN	5	NaN	6.3	5.8	NaN	NaN	NaN	5.1	NaN	NaN	5.9	6.5	5.6	5.2	5.1	5.2	5.1	5.2	5.4	NaN	5	6	NaN	5.1	5.4	NaN	5.5	NaN	5.4	NaN
6.2	NaN	5.1	5.1	5	5.9	5.7	5.8	NaN	NaN	5.9	5.5	NaN	NaN	5.1	5.4	5.6	NaN	5.1	NaN	5	5.9	5.1	5	5.8	NaN	NaN	5.1	5.8	NaN	6.6	7.2	5.6	5.8	6.5	5.2	5.5	5.2	5.2	5.9	5	5.8	NaN	5.1	NaN	5.7	5.5	5.8	NaN	5.8
5.6	5.4	NaN	NaN	NaN	5.2	NaN	NaN	NaN	NaN	5.2	NaN	5.6	5.4	NaN	NaN	NaN	NaN	NaN	NaN	NaN	NaN	NaN	5.9	5.4	5.4	5.8	5.5	NaN	NaN	5.4	5.6	5.6	5.4	NaN	NaN	NaN	NaN	NaN	5.3	NaN	5.7	5.6	NaN	NaN	NaN	NaN	NaN	NaN	NaN
6.2	NaN	5.1	5.1	5	5.9	5.7	5.8	NaN	NaN	5.9	5.2	NaN	NaN	5.1	5.2	5.2	NaN	6	NaN	5	5.9	6.2	5.9	NaN	NaN	NaN	5.1	5.3	5.4	5.1	6.1	5.6	5.2	5.1	5.2	5.1	5.2	5.2	5.9	5	6.3	NaN	5.1	5.4	5.7	5.5	5.8	5.4	5.8
6.2	NaN	5.1	5.1	5	5.9	5.7	5.8	NaN	NaN	5.9	5.2	NaN	NaN	5.1	5.2	5.2	NaN	6.3	NaN	5	5.9	6.5	6	NaN	NaN	NaN	5.1	5.3	5.4	5.1	5.8	5.6	5.2	5.1	5.2	5.1	5.2	5.2	5.9	5	6	NaN	5.1	5.4	5.7	5.1	5.8	5.4	5.8
6.2	NaN	5.1	5.1	5	5.9	5.7	5.8	NaN	NaN	NaN	5.2	NaN	NaN	NaN	NaN	NaN	NaN	5.9	NaN	5	5.9	6	5.6	NaN	NaN	NaN	5.1	5.3	5.4	6.6	6	5.6	5.2	5.1	NaN	5.1	NaN	5.2	5.9	5	6.8	NaN	NaN	5.4	5.7	5.1	5.8	5.4	NaN
6.2	NaN	5.1	5.1	5	5.9	5.7	5.8	NaN	NaN	NaN	5.2	NaN	NaN	5.1	5.2	5.2	NaN	NaN	NaN	5	5.9	7.6	7.2	NaN	5.4	NaN	5.1	5.4	5.4	6.6	6.8	5.6	5.2	5.1	5.2	5.1	NaN	5.3	5.9	5	7.6	NaN	NaN	5.4	5.7	5.5	5.8	5.4	NaN
NaN	NaN	5.2	5.1	5	NaN	NaN	NaN	NaN	NaN	NaN	NaN	NaN	NaN	NaN	NaN	NaN	NaN	5.1	NaN	5	NaN	5.1	NaN	NaN	NaN	NaN	5.1	5	NaN	NaN	NaN	NaN	NaN	NaN	NaN	NaN	NaN	5.2	NaN	NaN	NaN	NaN	NaN	NaN	NaN	5.1	NaN	NaN	NaN
6.2	NaN	5.1	5.1	5	NaN	NaN	5.8	NaN	NaN	NaN	5.1	NaN	NaN	NaN	NaN	NaN	NaN	5.1	NaN	5	NaN	5.1	5	NaN	NaN	NaN	5.1	5	5.4	NaN	NaN	5.6	NaN	5.2	NaN	NaN	NaN	5.2	5.9	NaN	5.2	NaN	NaN	NaN	5.7	5.1	5.8	5.4	NaN
NaN	NaN	5.1	5.1	5	NaN	NaN	NaN	NaN	NaN	NaN	NaN	NaN	NaN	5.1	5.2	5.2	NaN	5.1	NaN	5	NaN	5.1	5	NaN	NaN	NaN	5.1	NaN	NaN	5.1	5	NaN	5.2	5.1	5.2	5.1	5.2	5.2	NaN	5	5.2	NaN	5.1	NaN	NaN	NaN	NaN	NaN	NaN
NaN	NaN	NaN	NaN	NaN	NaN	NaN	NaN	NaN	NaN	NaN	NaN	NaN	NaN	NaN	NaN	NaN	NaN	NaN	NaN	NaN	NaN	NaN	NaN	NaN	NaN	NaN	NaN	NaN	NaN	NaN	NaN	NaN	NaN	NaN	NaN	NaN	NaN	NaN	NaN	NaN	NaN	NaN	NaN	NaN	NaN	NaN	NaN	NaN	NaN
NaN	NaN	NaN	NaN	NaN	NaN	NaN	NaN	NaN	NaN	NaN	NaN	NaN	NaN	NaN	NaN	NaN	NaN	NaN	NaN	NaN	NaN	NaN	NaN	NaN	NaN	NaN	NaN	NaN	NaN	NaN	NaN	NaN	NaN	NaN	NaN	NaN	NaN	NaN	NaN	NaN	NaN	NaN	NaN	NaN	NaN	NaN	NaN	NaN	NaN
NaN	NaN	NaN	NaN	NaN	NaN	NaN	NaN	NaN	NaN	NaN	NaN	NaN	NaN	NaN	NaN	NaN	NaN	NaN	NaN	NaN	NaN	NaN	NaN	NaN	NaN	NaN	NaN	NaN	NaN	NaN	NaN	NaN	NaN	NaN	NaN	NaN	NaN	NaN	NaN	NaN	NaN	NaN	NaN	NaN	NaN	NaN	NaN	NaN	NaN
6.6	5.4	NaN	NaN	NaN	6.1	NaN	NaN	NaN	NaN	5.8	NaN	5.6	5.4	NaN	NaN	NaN	NaN	NaN	NaN	NaN	NaN	NaN	6	5.4	5.4	5.8	5.5	NaN	NaN	5.4	5.6	6.1	5.4	NaN	NaN	NaN	NaN	NaN	5.3	NaN	5.7	5.6	NaN	NaN	NaN	NaN	NaN	NaN	NaN
6.2	NaN	5.1	5.1	5	NaN	NaN	5.8	NaN	NaN	NaN	5.1	NaN	NaN	NaN	NaN	NaN	NaN	6.3	NaN	5	NaN	5.8	6	NaN	NaN	NaN	5.4	5.1	5.7	NaN	NaN	7.2	NaN	5.6	NaN	NaN	NaN	5.2	5.9	NaN	6.1	NaN	NaN	NaN	5.7	5.1	5.8	5.4	NaN
5.4	NaN	NaN	NaN	NaN	5.2	NaN	NaN	NaN	NaN	5.2	NaN	5.6	5.1	NaN	NaN	NaN	NaN	NaN	NaN	NaN	NaN	NaN	NaN	NaN	5.4	5.8	NaN	NaN	NaN	5.4	5.6	5.6	5.4	NaN	NaN	NaN	NaN	NaN	5.3	NaN	5.7	NaN	NaN	NaN	NaN	NaN	NaN	NaN	NaN
5.4	NaN	NaN	NaN	NaN	5.2	NaN	NaN	NaN	NaN	5.2	NaN	5.6	5.1	NaN	NaN	NaN	NaN	NaN	NaN	NaN	NaN	NaN	NaN	NaN	5.4	5.8	NaN	NaN	NaN	5.4	5.6	5.6	5.4	NaN	NaN	NaN	NaN	NaN	5.3	NaN	5.7	NaN	NaN	NaN	NaN	NaN	NaN	NaN	NaN
4.6	NaN	NaN	NaN	NaN	NaN	NaN	NaN	NaN	NaN	NaN	NaN	4.6	NaN	NaN	NaN	NaN	NaN	NaN	NaN	NaN	NaN	NaN	NaN	4.1	4.4	4.8	NaN	NaN	NaN	NaN	4.8	NaN	NaN	NaN	NaN	NaN	NaN	NaN	4.3	NaN	4.3	4.4	NaN	NaN	NaN	NaN	NaN	NaN	NaN
NaN	NaN	NaN	NaN	NaN	NaN	NaN	NaN	NaN	NaN	NaN	NaN	NaN	NaN	NaN	NaN	NaN	NaN	NaN	NaN	NaN	NaN	NaN	NaN	NaN	NaN	NaN	NaN	NaN	NaN	NaN	NaN	NaN	NaN	NaN	NaN	NaN	NaN	NaN	NaN	NaN	NaN	NaN	NaN	NaN	NaN	NaN	NaN	NaN	NaN
6.4	5.4	NaN	NaN	NaN	5.7	NaN	NaN	NaN	NaN	5.2	NaN	5.6	5.5	NaN	NaN	NaN	NaN	NaN	NaN	NaN	NaN	NaN	5.5	5.7	5.4	5.8	5.5	NaN	NaN	5.4	5.6	6.5	5.4	NaN	NaN	NaN	NaN	NaN	5.4	NaN	5.7	6.1	NaN	NaN	NaN	NaN	NaN	NaN	NaN
NaN	NaN	5.1	5.1	5	5.9	5.7	5.8	NaN	NaN	5.9	5.3	NaN	NaN	5.1	5.2	5.2	NaN	5.1	NaN	5	5.9	5.3	5	NaN	NaN	NaN	5.1	5.8	NaN	6.1	7.1	5.6	5.2	5.1	5.2	5.1	5.2	5.2	6.3	5	6.3	NaN	5.1	5.4	5.7	5.5	5.8	5.4	5.8
NaN	NaN	NaN	NaN	NaN	NaN	NaN	NaN	NaN	NaN	NaN	NaN	NaN	NaN	NaN	NaN	NaN	NaN	NaN	NaN	NaN	NaN	NaN	NaN	NaN	NaN	NaN	NaN	NaN	NaN	NaN	NaN	NaN	NaN	NaN	NaN	NaN	NaN	NaN	NaN	NaN	NaN	NaN	NaN	NaN	NaN	NaN	NaN	NaN	NaN
NaN	NaN	NaN	NaN	NaN	4.2	NaN	NaN	NaN	NaN	NaN	NaN	NaN	NaN	NaN	NaN	NaN	NaN	NaN	NaN	NaN	NaN	NaN	4.3	4.2	4	NaN	4.6	NaN	NaN	NaN	4.6	4.1	4.7	NaN	NaN	NaN	NaN	NaN	4.8	NaN	NaN	4.4	NaN	NaN	NaN	NaN	NaN	NaN	NaN
NaN	NaN	5.1	5.1	5	NaN	NaN	5.8	NaN	NaN	NaN	5.3	NaN	NaN	NaN	NaN	NaN	NaN	6.1	NaN	5	NaN	6.5	6.4	NaN	NaN	NaN	5.1	5.6	5.4	NaN	NaN	5.6	NaN	6.8	NaN	NaN	NaN	5.2	5.9	NaN	5.3	NaN	NaN	NaN	5.7	5.1	5.8	5.4	NaN
NaN	NaN	5.1	5.1	5	6.1	5.7	NaN	NaN	NaN	NaN	5.2	NaN	NaN	5.1	5.2	5.2	NaN	5.1	NaN	5	NaN	NaN	5	NaN	NaN	NaN	5.1	5.3	5.4	5.1	5	5.6	5.2	5.1	5.2	5.1	5.2	6.8	NaN	5	5.6	NaN	5.1	5.4	5.7	5.5	NaN	5.4	5.8
NaN	4.4	NaN	NaN	NaN	NaN	NaN	NaN	NaN	NaN	NaN	NaN	NaN	NaN	NaN	NaN	NaN	NaN	NaN	NaN	NaN	NaN	NaN	NaN	NaN	NaN	NaN	NaN	NaN	NaN	NaN	4.8	4	4.6	NaN	NaN	NaN	NaN	NaN	NaN	NaN	4.3	4.5	NaN	NaN	NaN	NaN	NaN	NaN	NaN
NaN	NaN	NaN	NaN	NaN	NaN	NaN	NaN	NaN	NaN	NaN	NaN	NaN	NaN	NaN	NaN	NaN	NaN	NaN	NaN	NaN	8.2	6.1	NaN	NaN	NaN	NaN	NaN	NaN	NaN	NaN	7.9	NaN	NaN	NaN	NaN	NaN	NaN	NaN	NaN	NaN	NaN	NaN	NaN	NaN	NaN	NaN	NaN	NaN	NaN
6.2	NaN	5.1	5.1	5	5.9	5.7	5.8	NaN	NaN	5.9	5.3	NaN	NaN	5.1	5.2	5.2	NaN	5.1	NaN	5	5.9	5.1	5	NaN	NaN	NaN	5.1	5.8	NaN	5.1	5.8	5.6	5.4	5.3	5.2	5.1	5.2	5.2	5.9	5.4	5.2	NaN	5.1	5.4	7.3	5.5	5.8	5.4	5.8
NaN	NaN	NaN	NaN	NaN	NaN	NaN	NaN	NaN	NaN	NaN	NaN	NaN	NaN	NaN	NaN	NaN	NaN	NaN	NaN	NaN	NaN	NaN	NaN	NaN	NaN	NaN	NaN	NaN	NaN	NaN	NaN	NaN	NaN	NaN	NaN	NaN	NaN	NaN	NaN	NaN	NaN	NaN	NaN	NaN	NaN	NaN	NaN	NaN	NaN
6.2	5.4	5.1	5.1	5	5.2	NaN	5.8	NaN	NaN	5.2	5.1	5.6	5.1	NaN	NaN	NaN	NaN	NaN	NaN	5	NaN	5.1	5.2	5.4	5.4	5.8	7.7	5	5.4	5.4	5.6	5.6	5.4	5.1	NaN	NaN	NaN	5.2	5.5	NaN	5.4	5.6	NaN	NaN	5.7	5.5	5.8	5.4	NaN
5.6	5.4	NaN	NaN	NaN	5.2	NaN	NaN	NaN	NaN	5.2	NaN	5.6	5.2	NaN	NaN	NaN	NaN	NaN	NaN	NaN	NaN	NaN	5.9	5.4	5.4	6.7	5.5	NaN	NaN	5.6	6.5	5.6	5.4	NaN	NaN	NaN	NaN	NaN	5.3	NaN	6.5	6.7	NaN	NaN	NaN	NaN	NaN	NaN	NaN
NaN	NaN	5.1	5.1	5	NaN	NaN	NaN	NaN	NaN	NaN	5.3	NaN	NaN	5.1	5.2	5.2	NaN	5.1	NaN	5	NaN	5.1	5	NaN	NaN	NaN	5.1	NaN	NaN	5.1	5	NaN	5.2	5.1	5.2	5.1	5.2	5.2	NaN	5	5.2	NaN	5.1	NaN	NaN	NaN	NaN	NaN	NaN
NaN	4.3	NaN	NaN	NaN	NaN	NaN	NaN	NaN	NaN	NaN	NaN	NaN	NaN	NaN	NaN	NaN	NaN	NaN	NaN	NaN	NaN	NaN	NaN	NaN	4.5	NaN	NaN	NaN	NaN	NaN	NaN	NaN	NaN	NaN	NaN	NaN	NaN	NaN	NaN	NaN	NaN	NaN	NaN	NaN	NaN	NaN	NaN	NaN	NaN
NaN	NaN	NaN	NaN	NaN	NaN	NaN	NaN	NaN	NaN	NaN	NaN	NaN	NaN	NaN	NaN	NaN	NaN	NaN	NaN	NaN	NaN	NaN	4.3	NaN	4.3	NaN	NaN	NaN	NaN	NaN	4.5	NaN	NaN	NaN	NaN	NaN	NaN	NaN	NaN	NaN	NaN	NaN	NaN	NaN	NaN	NaN	NaN	NaN	NaN
4.9	NaN	4.1	4.1	4.4	4.8	NaN	NaN	NaN	NaN	4.3	NaN	4.9	NaN	NaN	NaN	NaN	NaN	NaN	4	NaN	NaN	NaN	NaN	5	NaN	NaN	4.7	NaN	NaN	NaN	6	4.4	4.9	NaN	NaN	NaN	NaN	NaN	4.6	NaN	NaN	NaN	NaN	NaN	4.7	NaN	4.8	NaN	NaN
NaN	NaN	5.1	5.1	5	5.9	5.8	5.8	NaN	NaN	5.9	5.5	NaN	NaN	5.1	5.2	5.2	NaN	5.1	NaN	5	5.9	5.1	5	NaN	NaN	NaN	5.1	5.8	NaN	5.1	5	5.6	5.2	5.1	5.2	5.1	5.2	5.2	5.9	5	5.3	NaN	5.1	5.4	6.5	5.5	5.8	5.4	5.8
NaN	NaN	5.1	5.1	5	5.9	NaN	5.8	NaN	NaN	5.9	5.3	NaN	NaN	5.1	5.2	5.2	NaN	5.1	NaN	5	5.9	5.1	5	NaN	NaN	NaN	5.1	5.8	NaN	6.3	6.4	5.6	5.2	5.8	5.2	5.1	5.2	5.2	5.9	5	5.2	NaN	5.1	NaN	5.8	5.5	5.8	5.4	5.8
5.7	5.4	NaN	NaN	NaN	5.2	NaN	NaN	NaN	NaN	5.2	NaN	5.6	5.4	NaN	NaN	NaN	NaN	NaN	NaN	NaN	NaN	NaN	5.5	5.4	6.5	5.8	5.5	NaN	NaN	5.4	5.6	7	5.4	NaN	NaN	NaN	NaN	NaN	5.3	NaN	5.7	5.6	NaN	NaN	NaN	NaN	NaN	NaN	NaN
NaN	NaN	NaN	NaN	NaN	NaN	NaN	NaN	NaN	NaN	NaN	NaN	NaN	NaN	5.9	5.4	5.4	NaN	NaN	NaN	NaN	NaN	NaN	NaN	NaN	NaN	NaN	NaN	NaN	NaN	NaN	NaN	NaN	NaN	NaN	NaN	NaN	NaN	NaN	NaN	NaN	NaN	NaN	NaN	NaN	NaN	NaN	NaN	NaN	NaN
NaN	NaN	5.1	5.1	5	5.5	5.7	5.8	NaN	NaN	5.9	5.4	NaN	NaN	6	5.2	5.2	NaN	5.4	4	5	5.9	5.1	5.1	NaN	NaN	NaN	5.1	5.8	NaN	5.3	6.5	5.6	5.2	5.1	5.2	5.1	5.2	5.2	5.9	5	6.1	NaN	5.1	5.4	5.7	5.5	5.8	5.4	5.8
NaN	NaN	5.1	5.1	5	NaN	NaN	NaN	NaN	NaN	NaN	NaN	NaN	NaN	5.1	5.2	5.2	NaN	5.1	NaN	5	NaN	5.1	5	NaN	NaN	NaN	5.1	NaN	NaN	5.3	6.3	NaN	5.2	5.1	5.2	5.1	5.2	5.2	NaN	5	5.8	NaN	5.1	NaN	NaN	NaN	NaN	NaN	NaN
NaN	NaN	5.1	5.1	5	NaN	NaN	NaN	NaN	NaN	NaN	NaN	NaN	NaN	5.1	NaN	NaN	NaN	5.1	NaN	5	NaN	5.1	5	NaN	NaN	NaN	5.1	NaN	NaN	5.1	5.7	NaN	NaN	5.1	NaN	NaN	NaN	NaN	NaN	5	NaN	NaN	NaN	NaN	NaN	NaN	NaN	NaN	NaN
6.2	NaN	NaN	8.2	NaN	5.9	5.7	5.8	NaN	NaN	5.9	6.3	NaN	NaN	7	8.3	8	NaN	7.5	NaN	NaN	8	8	7.2	NaN	7.9	NaN	5.4	7.1	NaN	NaN	NaN	5.6	5.6	6.5	7.2	6.8	7.1	6.1	8.4	6.1	NaN	NaN	6.9	5.4	5.7	5.5	5.8	5.4	5.8
NaN	5.7	NaN	NaN	NaN	5.5	NaN	NaN	NaN	NaN	5.5	NaN	NaN	5.7	NaN	NaN	NaN	NaN	NaN	NaN	NaN	NaN	NaN	NaN	5.7	NaN	NaN	6.7	NaN	NaN	NaN	5.9	NaN	NaN	NaN	NaN	NaN	NaN	NaN	5.6	NaN	NaN	NaN	NaN	NaN	NaN	NaN	NaN	NaN	NaN
4.2	NaN	NaN	NaN	NaN	NaN	NaN	NaN	NaN	NaN	NaN	NaN	4.1	4.1	NaN	NaN	NaN	NaN	NaN	4	NaN	NaN	NaN	NaN	NaN	NaN	4.2	5.4	NaN	NaN	NaN	5.1	4	NaN	NaN	NaN	NaN	NaN	NaN	4.1	NaN	4.2	4.3	NaN	NaN	NaN	NaN	NaN	NaN	NaN
6.6	6.8	NaN	NaN	NaN	5.5	NaN	NaN	NaN	NaN	5.3	NaN	5.6	5.4	NaN	NaN	NaN	NaN	NaN	4	NaN	NaN	NaN	6.9	6.6	5.4	6.8	5.5	NaN	NaN	5.8	6.9	6.1	5.4	NaN	NaN	NaN	NaN	NaN	5.8	NaN	6.3	6.2	NaN	NaN	NaN	NaN	NaN	NaN	NaN
NaN	4.8	NaN	NaN	NaN	NaN	NaN	NaN	NaN	NaN	NaN	NaN	4	NaN	NaN	NaN	NaN	NaN	NaN	4	NaN	NaN	NaN	6.2	NaN	5.7	4.2	NaN	NaN	NaN	4.3	6	5.4	5.1	NaN	NaN	NaN	NaN	NaN	NaN	NaN	4.1	NaN	NaN	NaN	NaN	NaN	NaN	NaN	NaN
4.2	4.4	NaN	NaN	NaN	NaN	NaN	NaN	NaN	NaN	4.3	NaN	4	4.2	NaN	NaN	NaN	NaN	NaN	NaN	NaN	NaN	NaN	4.8	4.3	4.5	4.4	4.9	NaN	NaN	4.3	5.3	5	4.7	NaN	NaN	NaN	NaN	NaN	NaN	NaN	4.8	4.8	NaN	NaN	NaN	NaN	NaN	NaN	NaN
NaN	NaN	NaN	NaN	NaN	NaN	NaN	NaN	NaN	NaN	NaN	NaN	NaN	NaN	NaN	NaN	NaN	NaN	NaN	NaN	5	NaN	NaN	NaN	NaN	NaN	NaN	NaN	NaN	NaN	NaN	NaN	NaN	NaN	NaN	NaN	NaN	NaN	NaN	NaN	NaN	NaN	NaN	NaN	NaN	NaN	NaN	NaN	NaN	NaN
NaN	NaN	NaN	NaN	NaN	NaN	NaN	NaN	NaN	NaN	NaN	NaN	NaN	NaN	NaN	NaN	NaN	NaN	NaN	NaN	NaN	NaN	NaN	NaN	NaN	NaN	NaN	NaN	NaN	NaN	NaN	4.6	NaN	4.9	NaN	NaN	NaN	NaN	NaN	5	NaN	NaN	4.1	NaN	NaN	NaN	NaN	NaN	NaN	NaN
NaN	NaN	NaN	NaN	NaN	NaN	NaN	NaN	NaN	NaN	NaN	NaN	NaN	NaN	NaN	NaN	NaN	NaN	NaN	NaN	NaN	NaN	NaN	NaN	NaN	NaN	NaN	NaN	NaN	NaN	NaN	4.7	NaN	NaN	NaN	NaN	NaN	NaN	NaN	NaN	NaN	NaN	NaN	NaN	NaN	NaN	NaN	NaN	NaN	NaN
NaN	NaN	NaN	NaN	NaN	4.3	NaN	NaN	NaN	NaN	NaN	NaN	4.2	NaN	NaN	NaN	NaN	NaN	NaN	NaN	NaN	NaN	NaN	4.7	NaN	4.4	4.3	NaN	NaN	NaN	4.1	4.6	4.3	4.1	NaN	NaN	NaN	NaN	NaN	4.1	NaN	4.3	4.6	NaN	NaN	NaN	NaN	NaN	NaN	NaN
NaN	NaN	NaN	NaN	NaN	NaN	NaN	NaN	NaN	NaN	NaN	NaN	NaN	NaN	NaN	NaN	NaN	NaN	NaN	NaN	NaN	NaN	NaN	NaN	NaN	4.4	4.5	NaN	NaN	NaN	NaN	4.9	NaN	NaN	NaN	NaN	NaN	NaN	NaN	NaN	NaN	NaN	4.4	NaN	NaN	NaN	NaN	NaN	NaN	NaN
NaN	NaN	NaN	NaN	NaN	NaN	NaN	NaN	NaN	NaN	NaN	NaN	NaN	NaN	NaN	NaN	NaN	NaN	NaN	NaN	NaN	NaN	NaN	NaN	NaN	NaN	NaN	NaN	NaN	NaN	NaN	NaN	NaN	NaN	NaN	NaN	NaN	NaN	NaN	NaN	NaN	NaN	NaN	NaN	NaN	NaN	NaN	NaN	NaN	NaN
NaN	NaN	5.1	5.1	5	NaN	NaN	NaN	NaN	NaN	NaN	NaN	NaN	NaN	5.6	5.4	5.5	NaN	5.1	NaN	5	NaN	5.1	5	NaN	NaN	NaN	5.1	NaN	NaN	5.1	5	NaN	5.2	5.1	NaN	5.1	NaN	NaN	NaN	5	5.2	NaN	5.1	NaN	NaN	NaN	NaN	NaN	NaN
5.6	5.4	NaN	NaN	NaN	5.2	NaN	NaN	NaN	NaN	5.2	NaN	5.6	5.4	NaN	NaN	NaN	NaN	NaN	NaN	NaN	NaN	NaN	5.5	5.4	7.9	5.8	5.5	NaN	NaN	5.4	5.6	5.6	5.4	NaN	NaN	NaN	NaN	NaN	5.3	NaN	5.7	5.6	NaN	NaN	NaN	NaN	NaN	NaN	NaN
NaN	NaN	5.1	5.1	5	NaN	NaN	5.8	NaN	NaN	NaN	5.1	NaN	NaN	NaN	NaN	NaN	NaN	5.1	NaN	7	NaN	5.1	5	NaN	NaN	NaN	5.1	5	5.4	NaN	NaN	5.6	NaN	5.1	NaN	NaN	NaN	5.2	5.9	NaN	5.2	NaN	NaN	NaN	5.8	5.5	5.8	5.4	NaN
6.6	NaN	5.1	5.1	5.4	6.6	7.7	7.8	NaN	NaN	7	6	NaN	NaN	5.2	6	6	NaN	5.2	4	5.3	5.9	5.5	5	NaN	NaN	NaN	5.6	7.1	5.4	6.5	7.3	7.6	5.2	5.1	5.2	5.1	5.2	5.2	7.2	5	5.2	NaN	5.1	5.4	7.1	6.4	5.8	5.6	7.5
NaN	NaN	NaN	NaN	NaN	7.1	NaN	NaN	NaN	NaN	NaN	NaN	NaN	NaN	NaN	NaN	NaN	NaN	NaN	NaN	NaN	NaN	NaN	NaN	NaN	NaN	NaN	NaN	NaN	NaN	NaN	NaN	NaN	NaN	NaN	NaN	NaN	NaN	NaN	NaN	NaN	NaN	NaN	NaN	NaN	NaN	NaN	NaN	NaN	NaN
NaN	NaN	NaN	NaN	NaN	6.9	NaN	NaN	NaN	NaN	NaN	NaN	NaN	NaN	NaN	NaN	NaN	NaN	NaN	NaN	NaN	NaN	NaN	NaN	NaN	NaN	NaN	NaN	NaN	NaN	NaN	NaN	NaN	NaN	NaN	NaN	NaN	NaN	NaN	NaN	NaN	NaN	NaN	NaN	NaN	NaN	NaN	NaN	NaN	NaN
NaN	NaN	NaN	NaN	NaN	NaN	NaN	NaN	NaN	NaN	NaN	NaN	NaN	NaN	NaN	NaN	NaN	NaN	NaN	NaN	NaN	NaN	NaN	NaN	NaN	NaN	NaN	NaN	NaN	NaN	5.2	5.3	NaN	NaN	NaN	NaN	NaN	NaN	NaN	NaN	NaN	NaN	NaN	NaN	NaN	NaN	NaN	NaN	NaN	NaN
NaN	NaN	NaN	NaN	NaN	NaN	NaN	NaN	NaN	NaN	NaN	NaN	NaN	NaN	NaN	NaN	NaN	NaN	4.8	NaN	NaN	NaN	4.7	NaN	NaN	NaN	NaN	NaN	5.2	NaN	NaN	NaN	NaN	NaN	NaN	NaN	NaN	NaN	5.2	NaN	NaN	NaN	NaN	NaN	NaN	NaN	NaN	NaN	NaN	NaN
NaN	NaN	NaN	NaN	NaN	NaN	NaN	NaN	NaN	NaN	NaN	NaN	NaN	NaN	NaN	NaN	NaN	NaN	NaN	NaN	NaN	NaN	5.2	NaN	NaN	NaN	NaN	NaN	NaN	NaN	NaN	NaN	5.9	NaN	NaN	NaN	NaN	NaN	NaN	NaN	NaN	NaN	NaN	NaN	NaN	NaN	NaN	NaN	NaN	NaN
6.2	NaN	5.4	5.4	5.4	5.9	5.7	6.2	NaN	NaN	6.1	5.2	NaN	NaN	5.1	5.7	5.2	NaN	5.1	5.5	5.4	5.9	5.5	5.2	NaN	NaN	NaN	7	7.7	5.4	5.1	5.8	5.6	5.5	5.1	5.7	5.6	5.6	5.2	5.9	5.8	5.2	NaN	5.1	5.4	6.6	5.5	5.8	6.2	6.1
NaN	NaN	NaN	5.1	5	NaN	NaN	NaN	NaN	NaN	NaN	NaN	6.1	NaN	5.1	NaN	NaN	NaN	5.1	NaN	5	NaN	5.1	NaN	NaN	NaN	NaN	5.1	NaN	NaN	NaN	NaN	NaN	NaN	NaN	NaN	NaN	NaN	NaN	NaN	5	NaN	NaN	NaN	NaN	NaN	NaN	NaN	NaN	5.9
4.2	4.7	NaN	NaN	NaN	NaN	NaN	NaN	NaN	NaN	4.1	NaN	4	4.5	NaN	NaN	NaN	NaN	NaN	NaN	NaN	NaN	NaN	4.9	4.4	5	4.9	5.6	NaN	NaN	4.7	5.4	4	4.7	NaN	NaN	NaN	NaN	NaN	4.6	NaN	5.2	5	NaN	NaN	NaN	NaN	NaN	NaN	NaN
NaN	NaN	4.1	4.1	4	NaN	NaN	NaN	NaN	NaN	NaN	NaN	4	NaN	NaN	NaN	NaN	NaN	NaN	4	NaN	NaN	NaN	NaN	NaN	NaN	4.2	4.2	NaN	NaN	NaN	5.3	4.2	4.8	NaN	NaN	NaN	NaN	NaN	NaN	NaN	4.5	4.8	NaN	NaN	NaN	NaN	NaN	NaN	NaN
NaN	NaN	NaN	NaN	NaN	NaN	NaN	NaN	NaN	NaN	NaN	NaN	NaN	NaN	NaN	NaN	NaN	NaN	NaN	NaN	NaN	NaN	NaN	NaN	NaN	4.9	4.4	NaN	NaN	NaN	NaN	4.1	NaN	NaN	NaN	NaN	NaN	NaN	NaN	NaN	NaN	NaN	NaN	NaN	NaN	NaN	NaN	NaN	NaN	NaN
6.1	6	NaN	NaN	NaN	6.1	NaN	NaN	NaN	NaN	5.4	NaN	6	5.4	NaN	NaN	NaN	NaN	NaN	NaN	NaN	NaN	NaN	7.5	5.6	5.4	5.9	5.5	NaN	NaN	5.4	5.9	5.9	5.4	NaN	NaN	NaN	NaN	NaN	6.3	NaN	5.7	5.8	NaN	NaN	NaN	NaN	NaN	NaN	NaN
NaN	NaN	NaN	NaN	NaN	NaN	NaN	NaN	NaN	NaN	NaN	NaN	NaN	NaN	NaN	NaN	NaN	NaN	NaN	NaN	NaN	NaN	NaN	NaN	NaN	NaN	NaN	NaN	NaN	NaN	NaN	NaN	NaN	NaN	NaN	NaN	NaN	NaN	NaN	NaN	NaN	NaN	NaN	NaN	NaN	NaN	NaN	NaN	NaN	NaN
6.2	NaN	5.1	5.1	5	NaN	NaN	5.8	NaN	NaN	NaN	5.1	NaN	NaN	NaN	NaN	NaN	NaN	5.7	4	5	NaN	5.1	5	NaN	NaN	NaN	5.3	6.1	5.4	NaN	NaN	5.6	NaN	5.9	NaN	NaN	NaN	8.2	6.6	NaN	6.1	NaN	NaN	NaN	5.7	5.5	5.8	5.4	NaN
5.6	5.4	NaN	NaN	NaN	5.2	NaN	NaN	NaN	NaN	5.2	NaN	5.6	5.4	NaN	NaN	NaN	NaN	NaN	NaN	NaN	NaN	NaN	5.5	5.4	5.4	5.8	5.5	NaN	NaN	5.4	5.6	5.6	7.3	NaN	NaN	NaN	NaN	NaN	5.3	NaN	5.7	5.6	NaN	NaN	NaN	NaN	NaN	NaN	NaN
4	4.4	NaN	NaN	NaN	NaN	NaN	NaN	NaN	NaN	NaN	NaN	4	4.2	NaN	NaN	NaN	NaN	NaN	NaN	NaN	NaN	NaN	4.3	4.1	4.7	4.4	4.9	NaN	NaN	NaN	5.5	4	4.1	NaN	NaN	NaN	NaN	NaN	4.2	NaN	4.9	4.6	NaN	NaN	NaN	NaN	NaN	NaN	NaN
NaN	NaN	NaN	NaN	NaN	NaN	NaN	NaN	NaN	NaN	NaN	NaN	NaN	NaN	NaN	NaN	NaN	NaN	NaN	4	NaN	6.3	NaN	NaN	NaN	NaN	NaN	NaN	NaN	NaN	NaN	NaN	NaN	NaN	NaN	NaN	NaN	NaN	NaN	NaN	NaN	NaN	NaN	NaN	NaN	NaN	NaN	NaN	NaN	NaN
7.2	NaN	5.1	5.1	5	NaN	6.5	6.9	NaN	NaN	6.5	5.3	NaN	NaN	5.1	5.2	5.2	NaN	6.3	NaN	5	5.9	5.1	6.2	NaN	NaN	NaN	5.1	5.8	NaN	5.3	6.7	8	5.2	5.1	5.2	5.1	5.2	5.2	5.9	5	5.2	NaN	5.1	5.4	5.7	7.9	5.8	5.4	6.1
NaN	NaN	NaN	NaN	NaN	NaN	NaN	NaN	NaN	NaN	NaN	NaN	4.1	NaN	NaN	NaN	NaN	NaN	NaN	NaN	NaN	NaN	NaN	NaN	NaN	NaN	NaN	NaN	NaN	NaN	NaN	NaN	NaN	NaN	NaN	NaN	NaN	NaN	NaN	NaN	NaN	NaN	NaN	NaN	NaN	NaN	NaN	NaN	NaN	NaN
7	7.2	8.6	8	8.2	8.3	NaN	8.8	NaN	NaN	7.1	7.9	8.4	8.5	NaN	NaN	NaN	9.7	8.4	NaN	8.4	NaN	NaN	8.4	7.2	7.7	7.9	8.6	8	7.3	7.7	8.7	8.1	5.9	5.6	NaN	NaN	NaN	5.8	8.7	NaN	8.6	8.3	NaN	6	7.6	6.6	7.5	6.6	8.5
NaN	NaN	5.5	5.1	5	NaN	NaN	NaN	NaN	NaN	NaN	5.1	NaN	NaN	NaN	NaN	NaN	NaN	5.1	NaN	5	NaN	5.1	5	NaN	NaN	NaN	5.1	NaN	NaN	NaN	NaN	NaN	NaN	5.1	NaN	NaN	NaN	5.2	NaN	NaN	5.2	NaN	NaN	NaN	NaN	NaN	NaN	NaN	NaN
6.1	5.4	5.1	5.1	5	5.2	5.7	5.8	NaN	NaN	5.2	5.2	5.6	5.4	5.1	5.3	5.2	NaN	6.4	NaN	5	5.9	5.9	6.5	6.7	5.4	7.2	5.3	5.9	5.4	6.6	8	6.1	5.5	6.1	6.8	7.3	NaN	5.3	5.4	5	6.4	6.8	NaN	5.4	5.7	5.1	5.8	5.4	NaN
NaN	NaN	NaN	NaN	NaN	NaN	NaN	NaN	NaN	NaN	NaN	NaN	NaN	NaN	5.4	5.2	5.2	NaN	NaN	NaN	NaN	NaN	NaN	NaN	NaN	NaN	NaN	NaN	NaN	NaN	NaN	NaN	NaN	NaN	NaN	NaN	NaN	NaN	NaN	NaN	NaN	NaN	NaN	NaN	NaN	NaN	NaN	NaN	NaN	NaN
6.2	NaN	5.1	5.1	5	5.9	5.7	5.8	NaN	NaN	5.9	5.3	NaN	NaN	5.1	5.2	5.2	NaN	5.1	NaN	5	5.9	5.1	5	NaN	NaN	NaN	5.1	5.8	NaN	5.1	5	5.6	5.2	6.5	5.2	5.1	5.2	5.2	5.9	5	5.2	NaN	5.1	5.4	7.6	5.5	5.8	5.4	5.8
NaN	5.4	5.1	5.1	5	5.3	NaN	NaN	NaN	NaN	5.2	5.1	5.7	5.4	NaN	NaN	NaN	NaN	5.1	NaN	5	NaN	6	5.2	5.4	5.4	5.8	5.2	5	5.4	5.4	NaN	NaN	5.4	5.1	NaN	NaN	NaN	5.2	5.5	NaN	5.4	NaN	NaN	NaN	NaN	5.5	NaN	5.4	NaN
6	5.4	NaN	NaN	NaN	6.2	NaN	NaN	NaN	NaN	5.8	NaN	6.5	6.8	NaN	NaN	NaN	NaN	NaN	NaN	NaN	NaN	NaN	6.5	6.2	6.6	7.3	6.4	NaN	NaN	5.4	7.4	6.6	6.1	NaN	NaN	NaN	NaN	NaN	6.1	NaN	6.9	7.2	NaN	NaN	NaN	NaN	NaN	NaN	NaN
5.6	5.4	NaN	NaN	NaN	5.2	NaN	NaN	NaN	NaN	8.5	NaN	5.6	5.4	NaN	NaN	NaN	NaN	NaN	NaN	NaN	NaN	NaN	5.5	5.4	5.4	5.8	5.5	NaN	NaN	6.2	5.6	5.6	5.4	NaN	NaN	NaN	NaN	NaN	5.3	NaN	5.7	5.6	NaN	NaN	NaN	NaN	NaN	NaN	NaN
6.7	7.5	5.1	5.1	5	5.6	NaN	7.2	NaN	NaN	6.3	5.4	5.6	5.2	5.1	5.2	5.2	NaN	5.1	NaN	5	5.9	5.1	5.2	7.3	5.4	5.8	6.2	5.8	NaN	5.3	6.3	6.9	5.3	5.1	5.2	5.1	5.2	5.2	7.7	5	5.7	6.6	5.1	NaN	5.7	5.6	5.8	5.4	6.5
5.7	5.4	5.1	5.1	5	5.4	5.7	5.8	NaN	NaN	5.4	5.2	5.6	5.3	5.4	5.2	5.3	5.6	5.1	NaN	5.6	5.9	5.1	5.1	5.4	5.4	5.8	5.2	5.3	5.4	5.3	5.2	5.6	5.6	7	5.2	5.1	5.2	5.2	5.6	5	5.4	5.6	5.1	5.4	6.2	5.5	5.9	6.3	5.8
NaN	NaN	NaN	NaN	NaN	NaN	NaN	NaN	NaN	NaN	NaN	NaN	NaN	NaN	NaN	NaN	NaN	NaN	NaN	NaN	NaN	NaN	NaN	NaN	NaN	NaN	NaN	NaN	NaN	NaN	NaN	NaN	NaN	NaN	NaN	NaN	NaN	NaN	NaN	NaN	NaN	NaN	NaN	NaN	NaN	NaN	NaN	NaN	NaN	NaN
5.6	5.7	NaN	NaN	NaN	5.6	NaN	NaN	NaN	NaN	5.2	NaN	5.6	5.4	NaN	NaN	NaN	NaN	NaN	NaN	NaN	NaN	NaN	5.5	7.4	5.4	6.2	5.5	NaN	NaN	6.4	7.5	6.9	7.4	NaN	NaN	NaN	NaN	NaN	5.9	NaN	7	6.9	NaN	NaN	NaN	NaN	NaN	NaN	NaN
6.2	NaN	6.1	5.1	5.7	NaN	NaN	5.8	NaN	NaN	NaN	5.1	NaN	NaN	NaN	NaN	NaN	NaN	6.9	NaN	5.6	NaN	6.9	7	NaN	NaN	NaN	5.1	6	5.4	NaN	NaN	5.6	NaN	6.1	NaN	NaN	NaN	6.3	6.6	NaN	7.7	NaN	NaN	NaN	5.7	5.5	5.8	5.4	NaN
6.2	NaN	5.1	5.1	5.4	5.9	6.1	5.8	NaN	NaN	5.9	5.5	NaN	NaN	5.5	5.3	5.6	NaN	5.1	NaN	5.8	5.9	5.5	5	NaN	NaN	NaN	5.1	5.8	NaN	5.4	6.3	5.6	5.2	5.6	5.6	5.7	5.2	5.2	5.9	5	6.3	NaN	5.1	NaN	5.9	5.5	5.8	5.4	6.2
6.2	NaN	5.1	5.1	5	5.9	5.7	5.8	NaN	NaN	5.9	5.4	NaN	NaN	5.2	5.9	5.5	NaN	5.7	NaN	5	5.9	5.9	5.3	NaN	NaN	NaN	5.1	5.8	NaN	5.1	5.9	5.6	5.2	5.1	5.2	5.1	5.2	5.2	6.5	5	5.3	NaN	5.1	6	5.7	5.5	5.8	5.4	5.9
6	6.2	5.1	5.1	5	5.2	5.7	5.8	NaN	NaN	4.4	5.3	4.2	4.3	5.1	5.6	5.2	NaN	5.1	NaN	5	5.9	5.1	5.2	4.7	6.3	4.8	5.1	5.8	NaN	4.7	5.9	5.3	5.3	5.2	5.2	5.1	5.2	5.2	4.6	5	5.7	5.5	5.1	5.4	5.7	5.5	5.8	5.4	5.8
NaN	5.4	4.3	4.3	4.3	5.1	NaN	NaN	NaN	NaN	5	5.3	5.2	5.4	5.1	5.2	5.2	NaN	5.1	4	5	NaN	5.1	5.1	5	5.3	4.5	5.2	5.9	NaN	5.2	5.4	4.5	5.3	5.1	5.2	5.1	5.2	5.2	5.3	5	4.5	5.6	5.1	5.4	5	5.5	5.1	5.4	NaN
NaN	NaN	5.7	5.8	5.6	NaN	NaN	5.8	NaN	NaN	NaN	5.1	NaN	NaN	NaN	NaN	NaN	NaN	5.1	NaN	5	NaN	5.4	5.9	NaN	NaN	NaN	5.1	5	5.6	NaN	NaN	5.6	NaN	5.1	NaN	NaN	NaN	5.2	6.3	NaN	5.2	NaN	NaN	NaN	5.7	5.1	5.8	5.4	NaN
5.6	5.4	NaN	NaN	NaN	5.2	NaN	NaN	NaN	NaN	5.2	NaN	5.6	5.4	NaN	NaN	NaN	NaN	NaN	NaN	NaN	NaN	NaN	5.5	5.4	8.1	5.8	5.5	NaN	NaN	5.4	5.6	5.6	5.4	NaN	NaN	NaN	NaN	NaN	5.3	NaN	5.7	5.6	NaN	NaN	NaN	NaN	NaN	NaN	NaN
5.4	NaN	NaN	NaN	NaN	5.2	NaN	NaN	NaN	NaN	5.2	NaN	5.6	5.1	NaN	NaN	NaN	NaN	NaN	NaN	NaN	NaN	NaN	NaN	NaN	5.4	5.8	NaN	NaN	NaN	5.4	5.6	5.6	5.4	NaN	NaN	NaN	NaN	NaN	5.3	NaN	5.7	NaN	NaN	NaN	NaN	NaN	NaN	NaN	NaN
NaN	NaN	NaN	NaN	NaN	NaN	NaN	NaN	NaN	NaN	NaN	NaN	NaN	NaN	NaN	NaN	NaN	NaN	NaN	NaN	NaN	NaN	NaN	NaN	NaN	NaN	NaN	NaN	NaN	NaN	NaN	4.4	NaN	NaN	NaN	NaN	NaN	NaN	NaN	NaN	NaN	4.2	4.1	NaN	NaN	NaN	NaN	NaN	NaN	NaN
NaN	NaN	NaN	NaN	NaN	NaN	NaN	NaN	NaN	NaN	NaN	NaN	NaN	NaN	NaN	NaN	NaN	NaN	NaN	NaN	NaN	NaN	NaN	NaN	NaN	NaN	NaN	4.8	NaN	NaN	NaN	4.9	NaN	NaN	NaN	NaN	NaN	NaN	NaN	NaN	NaN	4.6	4.2	NaN	NaN	NaN	NaN	NaN	NaN	NaN
NaN	NaN	NaN	NaN	NaN	NaN	NaN	NaN	NaN	NaN	NaN	NaN	4	NaN	NaN	NaN	NaN	NaN	NaN	NaN	NaN	NaN	NaN	NaN	NaN	NaN	4.2	5.7	NaN	NaN	NaN	6.7	4	4.7	NaN	NaN	NaN	NaN	NaN	5.3	NaN	4.1	6.2	NaN	NaN	NaN	NaN	NaN	NaN	NaN
5.6	5.9	NaN	NaN	NaN	6.6	NaN	NaN	NaN	NaN	5.2	NaN	5.6	5.4	NaN	NaN	NaN	NaN	NaN	NaN	NaN	NaN	NaN	6.4	5.4	6.3	6.2	5.5	NaN	NaN	6.1	7.6	5.6	5.4	NaN	NaN	NaN	NaN	NaN	5.4	NaN	5.7	6.1	NaN	NaN	NaN	NaN	NaN	NaN	NaN
6.2	NaN	5.1	5.1	5	7.3	5.7	5.8	NaN	NaN	6.2	6	NaN	NaN	5.4	6.4	6.3	NaN	5.6	NaN	5.3	5.9	6.8	5.8	NaN	NaN	NaN	5.1	5.9	NaN	6	6.6	5.6	5.2	5.1	5.2	5.1	5.2	5.2	5.9	5.5	5.6	NaN	5.1	5.4	NaN	5.5	5.8	5.6	6.6
NaN	NaN	5.1	5.1	5	5.9	5.7	5.8	NaN	NaN	5.9	5.9	NaN	NaN	5.9	5.6	5.8	NaN	6.1	NaN	5	6.3	5.7	5.4	NaN	NaN	NaN	5.1	5.8	NaN	6.4	7.1	5.6	5.3	6	5.2	5.1	5.2	5.4	5.9	5	7	NaN	5.1	5.4	5.7	5.9	5.8	5.4	5.8
NaN	NaN	NaN	NaN	NaN	NaN	NaN	NaN	NaN	NaN	NaN	NaN	NaN	NaN	NaN	NaN	NaN	NaN	NaN	NaN	NaN	NaN	NaN	NaN	NaN	NaN	NaN	NaN	5.4	NaN	NaN	NaN	NaN	NaN	NaN	NaN	NaN	NaN	NaN	NaN	NaN	5.8	NaN	NaN	NaN	NaN	NaN	NaN	NaN	NaN
NaN	NaN	NaN	NaN	NaN	NaN	NaN	NaN	NaN	NaN	NaN	NaN	NaN	NaN	5.7	5.7	5.8	NaN	NaN	NaN	NaN	NaN	NaN	NaN	NaN	NaN	NaN	NaN	NaN	NaN	NaN	NaN	NaN	NaN	NaN	NaN	NaN	NaN	NaN	NaN	NaN	NaN	NaN	NaN	NaN	NaN	NaN	NaN	NaN	NaN
NaN	5.2	4.1	4.1	4	NaN	NaN	NaN	NaN	NaN	NaN	NaN	4	4.2	NaN	NaN	NaN	NaN	NaN	NaN	NaN	NaN	NaN	5.1	4.4	4.8	4.9	NaN	NaN	NaN	4.4	5.3	4.2	4.7	NaN	NaN	NaN	NaN	NaN	4.5	NaN	5.2	4.8	NaN	NaN	NaN	NaN	NaN	NaN	NaN
5.6	6.2	NaN	NaN	NaN	5.2	NaN	NaN	NaN	NaN	5.2	NaN	5.6	5.4	NaN	NaN	NaN	NaN	NaN	NaN	NaN	NaN	NaN	6.3	5.4	6.5	6	5.5	NaN	NaN	5.7	7.6	5.6	5.4	NaN	NaN	NaN	NaN	NaN	5.3	NaN	6.9	7.3	NaN	NaN	NaN	NaN	NaN	NaN	NaN
NaN	NaN	NaN	NaN	NaN	NaN	NaN	NaN	NaN	NaN	NaN	NaN	NaN	NaN	NaN	NaN	NaN	NaN	NaN	NaN	NaN	NaN	NaN	NaN	NaN	NaN	NaN	NaN	NaN	NaN	NaN	NaN	NaN	NaN	NaN	NaN	NaN	NaN	NaN	NaN	NaN	NaN	NaN	NaN	NaN	NaN	NaN	NaN	NaN	NaN
NaN	NaN	5.1	5.1	5	NaN	5.7	5.8	NaN	NaN	NaN	5.2	NaN	NaN	5.1	5.2	5.2	NaN	5.1	4	5	NaN	5.1	5	NaN	NaN	NaN	5.1	5.3	5.4	5.1	5	5.6	5.2	5.1	5.2	5.1	5.2	5.2	5.9	5	5.2	NaN	5.1	5.4	5.7	5.5	5.8	5.4	5.8
NaN	NaN	NaN	NaN	NaN	5.7	NaN	NaN	NaN	NaN	NaN	NaN	5.9	5.9	NaN	NaN	NaN	NaN	NaN	NaN	NaN	NaN	NaN	NaN	5.6	5.6	6	6.1	NaN	NaN	NaN	6.1	5.7	NaN	NaN	NaN	NaN	NaN	NaN	NaN	NaN	6	5.9	NaN	NaN	NaN	NaN	NaN	NaN	NaN
NaN	NaN	NaN	NaN	NaN	NaN	NaN	NaN	NaN	NaN	NaN	NaN	NaN	NaN	NaN	NaN	NaN	NaN	NaN	NaN	NaN	NaN	NaN	NaN	NaN	NaN	NaN	NaN	NaN	NaN	NaN	NaN	NaN	NaN	NaN	NaN	NaN	NaN	NaN	NaN	NaN	NaN	NaN	NaN	NaN	NaN	NaN	NaN	NaN	NaN
5.6	5.5	NaN	NaN	NaN	5.2	NaN	NaN	NaN	NaN	5.2	NaN	6	5.4	NaN	NaN	NaN	NaN	NaN	NaN	NaN	NaN	NaN	5.5	5.4	5.8	5.8	6	NaN	NaN	5.4	5.6	5.6	5.4	NaN	NaN	NaN	NaN	NaN	5.3	NaN	5.7	5.6	NaN	NaN	NaN	NaN	NaN	NaN	NaN
NaN	NaN	NaN	NaN	NaN	NaN	NaN	NaN	NaN	NaN	NaN	NaN	NaN	NaN	5.6	5.3	5.5	NaN	NaN	NaN	NaN	NaN	NaN	NaN	NaN	NaN	NaN	NaN	NaN	NaN	NaN	NaN	NaN	5.8	5.4	NaN	NaN	NaN	NaN	NaN	NaN	NaN	NaN	NaN	NaN	NaN	NaN	NaN	NaN	NaN
NaN	NaN	NaN	NaN	NaN	NaN	NaN	NaN	NaN	NaN	NaN	NaN	NaN	NaN	NaN	NaN	NaN	NaN	NaN	NaN	NaN	NaN	NaN	NaN	NaN	NaN	NaN	NaN	NaN	NaN	5.1	NaN	NaN	NaN	NaN	NaN	NaN	NaN	NaN	NaN	NaN	5.5	NaN	NaN	NaN	NaN	NaN	NaN	NaN	NaN
NaN	NaN	5.1	5.1	5	NaN	NaN	6.6	NaN	NaN	NaN	5.3	NaN	NaN	NaN	NaN	NaN	NaN	6.2	4	5.9	NaN	6.1	5.9	NaN	NaN	NaN	5.1	5	5.4	NaN	NaN	6.8	NaN	5.5	NaN	NaN	NaN	5.2	5.9	NaN	6.2	NaN	NaN	NaN	6.5	5.1	5.8	7	NaN
NaN	NaN	5.1	5.1	5	NaN	NaN	NaN	NaN	NaN	NaN	NaN	NaN	NaN	5.3	NaN	5.2	NaN	5.1	NaN	5	NaN	5.1	5	NaN	NaN	NaN	5.1	NaN	NaN	5.1	5	NaN	5.2	5.1	NaN	5.1	NaN	NaN	NaN	5	5.2	NaN	5.1	NaN	NaN	NaN	NaN	NaN	NaN
NaN	4.6	4.1	4.1	4	4.9	NaN	NaN	NaN	NaN	NaN	NaN	4	NaN	NaN	NaN	NaN	NaN	NaN	NaN	NaN	NaN	NaN	5.1	NaN	4.7	4.5	4.1	NaN	NaN	4.4	6	4.2	6.4	NaN	NaN	NaN	NaN	NaN	4.2	NaN	5.1	5.2	NaN	NaN	4.7	NaN	4.8	NaN	NaN
4.6	4.9	NaN	NaN	NaN	4.5	NaN	NaN	NaN	NaN	NaN	NaN	4	4.7	NaN	NaN	NaN	NaN	NaN	4	NaN	NaN	NaN	NaN	4.5	NaN	4.2	5.8	NaN	NaN	4.5	6.3	4.1	4.9	NaN	NaN	NaN	NaN	NaN	5.2	NaN	5.8	5.5	NaN	NaN	NaN	NaN	NaN	NaN	NaN
6.2	NaN	5.1	5.1	5	5.9	5.7	5.8	NaN	NaN	5.9	5.3	NaN	NaN	5.1	5.2	5.2	NaN	5.2	NaN	5	5.9	5.5	5.1	NaN	NaN	NaN	5.1	5.8	NaN	6.1	7.5	5.6	5.5	6	5.2	5.1	5.2	5.2	6	5.1	6.4	NaN	5.1	5.4	5.7	5.5	5.8	5.4	5.8
NaN	5.4	NaN	NaN	NaN	5.2	NaN	NaN	NaN	NaN	5.4	NaN	NaN	5.4	NaN	NaN	NaN	NaN	NaN	NaN	NaN	NaN	NaN	NaN	5.4	5.4	NaN	5.7	NaN	NaN	NaN	6.4	NaN	5.4	NaN	NaN	NaN	NaN	NaN	5.3	NaN	6.1	5.6	NaN	NaN	NaN	NaN	NaN	NaN	NaN
NaN	NaN	NaN	NaN	NaN	NaN	NaN	NaN	NaN	NaN	NaN	NaN	NaN	NaN	NaN	NaN	NaN	NaN	NaN	NaN	NaN	NaN	NaN	NaN	NaN	NaN	NaN	NaN	NaN	NaN	NaN	NaN	NaN	5.5	NaN	NaN	NaN	NaN	NaN	NaN	NaN	NaN	NaN	NaN	NaN	NaN	NaN	NaN	NaN	NaN
NaN	5.8	NaN	NaN	NaN	6.9	NaN	NaN	NaN	NaN	6	NaN	6.8	6.5	NaN	NaN	NaN	NaN	NaN	NaN	NaN	NaN	NaN	7.3	6.5	5.4	6.3	NaN	NaN	NaN	5.6	6.3	5.6	6	NaN	NaN	NaN	NaN	NaN	5.3	NaN	5.7	5.6	NaN	NaN	NaN	NaN	NaN	NaN	NaN
6.2	NaN	6.8	6.3	6.2	NaN	NaN	5.8	NaN	NaN	NaN	5.1	NaN	NaN	NaN	NaN	NaN	NaN	5.1	NaN	5.5	NaN	5.7	5.2	NaN	NaN	NaN	5.1	6.4	5.5	NaN	NaN	5.6	NaN	5.4	NaN	NaN	NaN	5.8	6.8	NaN	5.4	NaN	NaN	NaN	5.7	5.5	5.8	5.4	NaN
6.4	6.7	NaN	NaN	NaN	6.2	NaN	NaN	NaN	NaN	6.4	NaN	6.3	6.7	NaN	NaN	NaN	NaN	NaN	NaN	NaN	NaN	NaN	6.9	6.2	6.9	7.4	7.3	NaN	NaN	6.7	7.7	5.9	6.9	NaN	NaN	NaN	NaN	NaN	6.6	NaN	7.5	7.1	NaN	NaN	NaN	NaN	NaN	NaN	NaN
NaN	5.4	NaN	NaN	NaN	5.2	NaN	NaN	NaN	NaN	5.2	NaN	5.6	5.1	NaN	NaN	NaN	NaN	NaN	NaN	NaN	NaN	NaN	5.5	5.6	5.4	5.8	NaN	NaN	NaN	6	7.2	5.6	5.4	NaN	NaN	NaN	NaN	NaN	7.1	NaN	7	7.5	NaN	NaN	NaN	NaN	NaN	NaN	NaN
NaN	NaN	NaN	NaN	NaN	NaN	NaN	NaN	NaN	NaN	NaN	NaN	4	NaN	NaN	NaN	NaN	NaN	NaN	4	NaN	NaN	NaN	NaN	NaN	4.9	4.2	NaN	NaN	NaN	NaN	5.4	4	NaN	NaN	NaN	NaN	NaN	NaN	NaN	NaN	4.1	NaN	NaN	NaN	NaN	NaN	NaN	NaN	NaN
NaN	NaN	NaN	NaN	NaN	NaN	NaN	NaN	NaN	NaN	NaN	NaN	NaN	NaN	NaN	NaN	NaN	NaN	NaN	NaN	NaN	NaN	NaN	NaN	NaN	NaN	NaN	NaN	NaN	NaN	NaN	NaN	NaN	NaN	NaN	NaN	NaN	NaN	NaN	NaN	NaN	5.8	NaN	NaN	NaN	NaN	NaN	NaN	NaN	NaN
NaN	NaN	NaN	NaN	NaN	NaN	NaN	NaN	NaN	NaN	NaN	NaN	NaN	NaN	NaN	NaN	NaN	NaN	NaN	NaN	NaN	NaN	6	NaN	NaN	NaN	NaN	NaN	NaN	NaN	NaN	NaN	NaN	NaN	NaN	NaN	NaN	NaN	NaN	NaN	NaN	NaN	NaN	NaN	NaN	NaN	NaN	NaN	NaN	NaN
6.1	5.4	NaN	NaN	NaN	5.5	NaN	NaN	NaN	NaN	5.2	NaN	5.6	5.4	NaN	NaN	NaN	NaN	NaN	NaN	NaN	NaN	NaN	7.3	6.6	5.7	5.9	5.5	NaN	NaN	5.4	5.6	5.7	5.4	NaN	NaN	NaN	NaN	NaN	5.3	NaN	5.7	5.6	NaN	NaN	NaN	NaN	NaN	NaN	NaN
5.6	5.4	NaN	NaN	NaN	5.2	NaN	NaN	NaN	NaN	5.2	NaN	5.6	5.4	NaN	NaN	NaN	NaN	NaN	NaN	NaN	NaN	NaN	6.8	5.4	5.4	6.1	5.5	NaN	NaN	5.4	6.4	5.6	5.4	NaN	NaN	NaN	NaN	NaN	5.3	NaN	5.7	5.6	NaN	NaN	NaN	NaN	NaN	NaN	NaN
[truncated: 106 more columns]

## Sheet: drug similarity
100	34	52	51	54	52	54	30	76	26	91	73	68	65	34	59	33	54	33	66	23	49	55	39	38	70	56	67	56	41	51	46	61	63	28	36	36	52	48	59	75	68	48	28	78	44	68	43	60	54
34	100	14	31	41	37	39	52	38	67	32	36	39	40	51	44	53	38	43	37	55	45	44	47	58	34	43	34	45	51	46	47	16	39	69	55	61	35	43	45	37	28	49	58	35	27	33	47	36	43
52	14	100	42	34	29	32	11	60	7	50	51	45	42	18	35	12	26	12	46	6	23	34	17	19	37	30	48	36	21	31	29	69	43	12	16	13	36	24	37	49	43	25	10	57	28	48	30	39	34
51	31	42	100	47	40	42	28	62	26	55	57	65	49	33	44	30	37	30	52	24	35	46	33	43	51	43	52	50	35	47	48	36	54	27	37	32	49	47	49	53	55	37	29	59	57	61	43	49	48
54	41	34	47	100	52	66	38	57	25	50	57	55	65	43	61	37	63	39	66	29	51	70	41	38	53	50	54	46	57	67	53	30	50	31	50	42	44	50	75	54	43	56	36	56	43	53	40	46	53
52	37	29	40	52	100	59	34	52	28	50	60	55	56	37	61	47	45	39	65	25	52	51	46	38	62	45	64	48	45	48	49	32	58	29	35	38	51	50	60	62	43	44	31	58	36	55	44	52	47
54	39	32	42	66	59	100	35	53	28	51	53	50	59	40	62	39	64	40	68	28	52	77	42	42	54	48	53	48	60	72	48	30	53	32	48	44	47	54	78	61	45	55	36	54	43	49	37	48	52
30	52	11	28	38	34	35	100	33	47	29	32	38	39	59	39	45	41	39	33	63	39	38	41	43	32	48	31	41	45	39	48	14	31	52	54	54	27	49	39	32	23	44	60	31	22	30	41	30	45
76	38	60	62	57	52	53	33	100	29	73	77	75	66	40	60	34	47	34	68	25	47	56	41	43	59	54	68	58	45	53	49	51	64	32	37	38	54	46	59	73	57	50	30	83	42	71	50	57	57
26	67	7	26	25	28	28	47	29	100	25	26	32	26	38	29	53	30	33	28	68	37	30	34	49	25	34	25	38	35	33	32	10	27	65	47	57	25	39	29	29	21	33	44	27	23	24	37	24	31
91	32	50	55	50	50	51	29	73	25	100	69	64	60	32	55	32	51	37	63	22	46	53	43	43	74	53	64	54	39	48	49	58	60	27	35	34	50	51	56	72	73	45	33	75	49	74	42	58	51
73	36	51	57	57	60	53	32	77	26	69	100	84	74	41	66	34	48	30	73	23	50	56	46	42	68	52	79	57	46	51	54	48	69	28	36	37	59	48	63	77	57	50	29	86	44	84	50	62	63
68	39	45	65	55	55	50	38	75	32	64	84	100	68	44	61	37	46	30	64	30	46	52	43	45	60	56	74	61	43	53	57	44	62	33	41	42	54	53	58	68	52	46	31	77	40	74	52	58	63
65	40	42	49	65	56	59	39	66	26	60	74	68	100	47	70	34	54	36	62	29	47	64	43	42	63	54	66	58	59	59	62	42	67	30	43	40	55	49	70	73	49	62	34	70	36	68	46	61	65
34	51	18	33	43	37	40	59	40	38	32	41	44	47	100	46	46	40	34	38	50	43	43	42	51	34	52	36	49	52	51	53	18	36	48	59	58	32	49	43	37	26	52	50	36	25	36	43	33	60
59	44	35	44	61	61	62	39	60	29	55	66	61	70	46	100	38	53	39	68	29	54	70	49	45	59	48	58	50	61	64	58	35	74	34	44	48	60	50	74	65	46	64	40	63	39	61	46	65	58
33	53	12	30	37	47	39	45	34	53	32	34	37	34	46	38	100	46	43	40	45	57	40	41	57	37	48	37	46	45	43	41	14	35	50	56	65	36	48	40	40	27	45	44	34	31	31	41	30	39
54	38	26	37	63	45	64	41	47	30	51	48	46	54	40	53	46	100	45	58	33	55	66	39	40	51	51	45	43	55	59	44	32	43	33	48	49	39	47	67	53	43	57	36	49	51	44	32	44	50
33	43	12	30	39	39	40	39	34	33	37	30	30	36	34	39	43	45	100	35	34	39	49	59	41	33	27	34	25	50	44	37	15	31	43	44	40	35	34	43	30	36	49	50	33	39	34	33	32	37
66	37	46	52	66	65	68	33	68	28	63	73	64	62	38	68	40	58	35	100	23	59	70	42	41	67	48	70	51	52	63	51	42	67	30	40	40	56	55	80	71	51	50	31	76	52	65	45	58	51
23	55	6	24	29	25	28	63	25	68	22	23	30	29	50	29	45	33	34	23	100	30	31	31	39	23	39	23	42	35	35	41	8	22	63	50	53	20	41	29	24	17	35	52	22	18	22	36	21	35
49	45	23	35	51	52	52	39	47	37	46	50	46	47	43	54	57	55	39	59	30	100	55	49	53	52	47	46	43	63	50	41	24	52	35	48	54	47	47	54	58	40	66	37	50	41	46	36	43	44
55	44	34	46	70	51	77	38	56	30	53	56	52	64	43	70	40	66	49	70	31	55	100	43	46	52	48	55	46	67	86	53	32	60	39	53	47	53	52	86	60	50	64	41	59	47	50	42	56	57
39	47	17	33	41	46	42	41	41	34	43	46	43	43	42	49	41	39	59	42	31	49	43	100	47	44	35	48	33	54	40	43	18	41	38	37	43	41	43	43	40	36	48	46	41	35	47	38	38	42
38	58	19	43	38	38	42	43	43	49	43	42	45	42	51	45	57	40	41	41	39	53	46	47	100	45	50	40	47	52	46	58	19	47	48	55	67	44	53	43	45	40	51	54	40	39	43	46	40	47
70	34	37	51	53	62	54	32	59	25	74	68	60	63	34	59	37	51	33	67	23	52	52	44	45	100	57	63	54	43	48	56	45	66	25	34	37	52	60	61	73	64	46	34	66	48	70	41	62	55
56	43	30	43	50	45	48	48	54	34	53	52	56	54	52	48	48	51	27	48	39	47	48	35	50	57	100	49	69	41	49	61	35	51	42	46	48	43	60	49	55	46	44	42	51	33	50	51	48	52
67	34	48	52	54	64	53	31	68	25	64	79	74	66	36	58	37	45	34	70	23	46	55	48	40	63	49	100	54	43	51	52	45	65	30	34	36	62	48	62	70	53	45	28	75	40	71	52	58	55
56	45	36	50	46	48	48	41	58	38	54	57	61	58	49	50	46	43	25	51	42	43	46	33	47	54	69	54	100	39	48	63	35	54	44	42	45	44	66	50	68	43	44	39	56	31	53	53	48	51
41	51	21	35	57	45	60	45	45	35	39	46	43	59	52	61	45	55	50	52	35	63	67	54	52	43	41	43	39	100	60	48	19	51	40	55	53	46	42	61	51	37	78	46	46	39	42	37	46	53
51	46	31	47	67	48	72	39	53	33	48	51	53	59	51	64	43	59	44	63	35	50	86	40	46	48	49	51	48	60	100	52	28	53	41	61	54	48	54	77	53	45	57	42	52	41	47	42	49	63
46	47	29	48	53	49	48	48	49	32	49	54	57	62	53	58	41	44	37	51	41	41	53	43	58	56	61	52	63	48	52	100	28	54	41	47	47	45	63	58	51	41	49	50	51	37	55	54	50	55
61	16	69	36	30	32	30	14	51	10	58	48	44	42	18	35	14	32	15	42	8	24	32	18	19	45	35	45	35	19	28	28	100	44	14	17	14	36	24	37	47	52	25	12	55	27	45	30	49	35
63	39	43	54	50	58	53	31	64	27	60	69	62	67	36	74	35	43	31	67	22	52	60	41	47	66	51	65	54	51	53	54	44	100	29	37	39	76	47	64	75	61	55	32	72	43	62	50	81	59
28	69	12	27	31	29	32	52	32	65	27	28	33	30	48	34	50	33	43	30	63	35	39	38	48	25	42	30	44	40	41	41	14	29	100	50	53	33	42	34	28	24	39	56	28	24	26	51	29	34
36	55	16	37	50	35	48	54	37	47	35	36	41	43	59	44	56	48	44	40	50	48	53	37	55	34	46	34	42	55	61	47	17	37	50	100	63	36	47	50	36	32	51	52	37	31	33	41	34	53
36	61	13	32	42	38	44	54	38	57	34	37	42	40	58	48	65	49	40	40	53	54	47	43	67	37	48	36	45	53	54	47	14	39	53	63	100	36	51	46	39	29	52	51	36	33	35	42	34	47
52	35	36	49	44	51	47	27	54	25	50	59	54	55	32	60	36	39	35	56	20	47	53	41	44	52	43	62	44	46	48	45	36	76	33	36	36	100	38	56	58	50	50	29	59	39	53	64	65	50
48	43	24	47	50	50	54	49	46	39	51	48	53	49	49	50	48	47	34	55	41	47	52	43	53	60	60	48	66	42	54	63	24	47	42	47	51	38	100	53	57	45	42	53	46	44	53	48	41	48
59	45	37	49	75	60	78	39	59	29	56	63	58	70	43	74	40	67	43	80	29	54	86	43	43	61	49	62	50	61	77	58	37	64	34	50	46	56	53	100	65	46	61	38	63	44	57	44	58	57
75	37	49	53	54	62	61	32	73	29	72	77	68	73	37	65	40	53	30	71	24	58	60	40	45	73	55	70	68	51	53	51	47	75	28	36	39	58	57	65	100	59	56	31	78	43	70	44	64	59
68	28	43	55	43	43	45	23	57	21	73	57	52	49	26	46	27	43	36	51	17	40	50	36	40	64	46	53	43	37	45	41	52	61	24	32	29	50	45	46	59	100	39	30	66	54	60	37	64	49
48	49	25	37	56	44	55	44	50	33	45	50	46	62	52	64	45	57	49	50	35	66	64	48	51	46	44	45	44	78	57	49	25	55	39	51	52	50	42	61	56	39	100	44	48	35	45	41	51	58
28	58	10	29	36	31	36	60	30	44	33	29	31	34	50	40	44	36	50	31	52	37	41	46	54	34	42	28	39	46	42	50	12	32	56	52	51	29	53	38	31	30	44	100	29	29	33	44	31	38
78	35	57	59	56	58	54	31	83	27	75	86	77	70	36	63	34	49	33	76	22	50	59	41	40	66	51	75	56	46	52	51	55	72	28	37	36	59	46	63	78	66	48	29	100	46	78	50	65	59
44	27	28	57	43	36	43	22	42	23	49	44	40	36	25	39	31	51	39	52	18	41	47	35	39	48	33	40	31	39	41	37	27	43	24	31	33	39	44	44	43	54	35	29	46	100	49	29	42	34
68	33	48	61	53	55	49	30	71	24	74	84	74	68	36	61	31	44	34	65	22	46	50	47	43	70	50	71	53	42	47	55	45	62	26	33	35	53	53	57	70	60	45	33	78	49	100	46	56	57
43	47	30	43	40	44	37	41	50	37	42	50	52	46	43	46	41	32	33	45	36	36	42	38	46	41	51	52	53	37	42	54	30	50	51	41	42	64	48	44	44	37	41	44	50	29	46	100	47	46
60	36	39	49	46	52	48	30	57	24	58	62	58	61	33	65	30	44	32	58	21	43	56	38	40	62	48	58	48	46	49	50	49	81	29	34	34	65	41	58	64	64	51	31	65	42	56	47	100	57
54	43	34	48	53	47	52	45	57	31	51	63	63	65	60	58	39	50	37	51	35	44	57	42	47	55	52	55	51	53	63	55	35	59	34	53	47	50	48	57	59	49	58	38	59	34	57	46	57	100
35	18	42	39	29	27	25	16	41	13	33	38	41	33	19	30	17	23	13	35	11	19	30	16	23	36	32	36	29	21	29	28	43	39	16	20	19	34	22	33	33	35	23	13	41	26	35	34	40	33
41	47	14	27	39	42	38	47	39	45	38	41	40	36	34	45	41	39	40	43	35	64	40	52	38	40	34	38	30	47	38	31	18	39	38	39	45	35	37	41	40	30	45	38	40	31	39	32	33	35
75	38	47	54	50	60	53	33	70	30	71	82	74	71	37	70	37	48	33	70	24	56	59	42	45	68	50	72	58	48	52	52	50	79	29	37	40	64	50	62	83	59	55	32	83	43	72	50	69	58
50	44	24	34	42	37	46	44	44	38	48	44	45	40	42	47	46	58	34	48	37	44	50	36	43	44	54	41	47	40	49	46	30	40	44	43	49	36	52	46	43	39	40	48	45	44	41	43	41	41
50	44	24	34	42	37	46	44	44	38	48	47	47	40	44	47	46	58	34	48	37	44	50	38	45	44	54	43	47	40	49	47	30	40	44	43	49	36	52	46	43	39	40	48	45	44	41	43	41	43
73	34	54	64	57	57	55	31	78	28	70	82	76	68	34	61	34	47	33	78	22	51	59	39	41	65	48	76	55	46	53	51	50	73	28	39	35	60	49	65	77	65	49	28	91	50	74	49	64	57
41	64	20	36	41	41	44	51	43	51	39	43	45	46	55	47	54	41	40	42	53	50	50	44	58	40	56	44	60	53	50	54	20	45	71	53	60	48	56	47	45	35	58	52	41	31	40	58	42	46
45	48	28	44	52	39	49	35	51	30	43	47	46	49	42	52	38	45	45	50	28	54	58	45	51	40	42	44	38	66	53	43	25	55	39	49	44	52	37	52	46	43	59	42	49	43	43	41	49	48
38	44	16	37	50	43	54	48	38	33	43	41	40	49	51	51	44	53	52	45	36	57	56	52	55	50	39	39	38	68	54	49	16	43	35	52	51	39	51	54	47	38	65	49	38	40	47	32	38	53
48	35	40	54	48	35	47	39	55	26	46	49	50	52	45	42	33	45	30	48	32	33	51	27	40	40	53	49	56	41	51	54	33	47	35	42	37	42	48	50	50	45	40	37	52	38	46	51	44	50
46	48	23	37	46	40	50	37	45	33	44	44	42	49	42	57	41	51	45	47	30	58	60	45	53	45	43	41	37	67	54	43	27	57	40	49	49	52	38	53	47	46	65	43	44	43	40	38	61	47
58	34	28	37	49	51	69	30	49	30	56	51	46	46	32	49	42	73	37	62	25	54	58	37	39	52	46	47	41	46	51	36	35	45	30	38	42	40	46	58	57	46	44	30	53	56	46	32	43	40
37	44	16	37	49	43	54	47	37	32	42	41	39	49	51	51	43	53	53	45	36	56	55	53	52	51	39	38	38	67	54	50	16	42	35	51	50	38	53	53	46	37	64	50	38	39	47	32	38	53
69	35	49	53	47	58	50	30	68	25	65	79	70	70	37	67	34	43	27	63	21	51	52	41	44	67	50	70	58	46	47	52	50	84	25	33	36	65	46	58	81	62	50	28	77	41	69	45	72	61
64	34	42	57	44	50	44	36	65	27	61	69	69	66	38	59	34	44	26	55	25	41	48	35	42	62	57	60	60	40	47	52	48	70	27	35	37	55	48	52	68	58	44	30	68	39	62	46	71	57
52	46	29	46	43	44	44	45	51	37	58	50	52	47	45	50	42	38	36	48	37	43	49	42	54	55	56	48	57	41	48	60	31	54	42	42	46	43	68	45	53	54	42	55	51	38	54	53	51	51
72	31	49	50	51	54	52	27	69	24	69	68	61	62	32	56	36	46	32	65	21	48	53	40	37	62	49	69	55	41	49	45	47	61	29	35	34	63	46	57	74	56	45	26	72	40	63	50	56	53
44	46	23	35	50	49	63	41	46	31	42	47	43	57	49	59	41	51	47	48	32	58	60	45	47	44	40	42	41	73	54	45	23	52	36	48	47	48	39	57	53	37	86	43	46	33	42	38	48	56
62	43	41	52	48	52	53	43	64	36	60	63	64	64	50	56	47	47	27	58	36	48	52	36	51	60	67	60	86	44	51	63	39	62	41	46	45	50	72	56	79	49	49	44	64	35	59	57	54	56
53	32	38	50	53	45	57	26	55	23	51	53	49	55	31	53	34	49	40	54	22	41	63	40	39	48	43	58	44	46	56	44	34	61	31	38	36	74	41	60	56	52	49	29	55	44	48	50	55	51
37	10	38	27	22	21	21	9	30	8	35	32	29	27	10	21	14	22	14	24	7	17	26	16	16	31	26	36	23	15	24	19	42	29	15	12	13	43	18	24	31	40	19	10	32	23	29	32	31	24
36	41	17	37	41	44	46	37	38	31	41	39	37	42	42	51	44	44	54	41	31	53	51	60	53	45	36	43	35	57	46	43	16	45	38	44	47	48	46	45	44	39	57	46	37	41	41	37	41	44
33	64	14	34	43	35	45	55	36	51	32	35	40	45	69	46	55	43	40	38	61	47	51	38	56	34	51	34	56	61	57	56	15	39	64	66	66	36	55	48	39	28	57	58	34	27	33	47	35	52
50	45	30	51	43	45	48	35	52	40	56	53	56	49	39	46	51	43	38	50	33	44	51	44	62	54	53	57	55	41	50	57	29	52	44	47	50	62	58	49	55	50	44	42	53	42	56	59	46	52
17	25	19	19	19	17	17	22	20	15	16	18	21	21	23	21	18	16	22	16	15	17	21	23	19	16	17	20	15	22	23	18	23	21	25	25	21	26	13	21	17	17	29	19	19	12	16	23	25	29
67	37	41	52	73	50	64	38	64	25	64	63	61	73	41	59	34	62	39	63	28	47	68	38	38	61	54	61	52	52	65	53	47	58	30	47	40	51	48	75	65	54	56	33	63	41	58	43	59	58
49	49	29	40	58	49	56	50	50	34	47	48	50	55	56	58	44	50	39	53	41	41	58	43	45	46	58	51	58	50	60	62	28	46	49	53	49	49	62	60	49	38	50	48	48	34	45	60	43	55
46	44	24	40	60	47	60	54	46	33	43	46	49	56	57	54	45	55	34	52	45	44	59	36	47	48	63	45	63	50	64	65	24	45	43	54	52	38	68	60	51	36	51	50	43	33	43	46	41	54
71	35	41	48	47	58	49	29	62	27	68	69	63	60	31	58	34	47	33	64	22	47	53	40	38	66	48	73	50	42	47	46	56	67	31	34	34	64	44	57	68	65	46	28	72	42	63	51	68	53
60	36	30	43	50	50	52	32	50	30	57	52	51	47	35	56	38	55	35	62	24	56	59	38	40	56	47	49	42	45	54	41	37	53	30	41	40	45	48	56	56	52	49	30	55	50	47	41	52	45
70	36	50	54	49	59	51	30	68	26	66	78	69	71	35	68	34	44	28	65	21	51	54	39	43	69	51	69	59	47	48	52	50	86	25	33	37	67	47	60	84	63	51	28	79	43	70	46	74	59
65	32	41	62	44	49	45	32	64	23	69	69	65	63	36	57	31	46	33	54	22	43	47	42	47	69	56	58	52	41	44	51	48	66	26	33	34	57	48	52	63	67	45	32	64	50	69	42	63	53
65	37	39	49	61	53	55	36	61	25	62	65	63	67	40	62	32	54	37	63	27	42	61	40	38	64	51	62	49	53	56	56	44	61	30	41	38	51	44	67	61	52	55	34	68	42	60	50	66	61
30	53	12	28	34	34	41	55	30	54	28	29	33	32	46	33	42	39	37	31	59	32	40	32	38	27	40	28	43	37	43	41	14	27	61	48	53	25	45	38	29	23	35	50	30	26	27	41	26	37
39	68	20	38	40	39	42	49	42	55	37	41	45	44	55	45	57	40	38	40	56	48	48	42	60	39	54	42	58	52	50	52	20	44	75	56	61	47	54	45	44	34	56	51	40	30	38	56	40	48
85	35	49	54	52	53	52	29	71	26	81	75	70	64	32	60	32	51	31	67	22	47	56	36	38	71	54	68	54	42	50	47	60	68	26	37	34	56	46	60	75	69	46	29	84	45	68	45	66	55
43	43	27	42	44	41	47	32	47	31	41	48	45	47	38	52	40	41	44	47	25	55	54	46	52	40	41	45	36	60	49	42	23	59	40	46	43	62	36	48	47	46	55	38	47	43	42	44	52	45
51	30	31	34	37	39	38	26	45	24	49	45	41	39	30	40	33	40	36	43	19	44	42	41	36	44	38	47	33	38	39	32	36	43	30	33	32	47	33	39	45	47	41	26	48	35	41	39	45	40
58	32	47	54	49	57	56	25	63	21	55	64	58	58	32	61	29	39	32	64	17	42	56	35	39	55	45	60	46	45	50	47	44	81	26	35	32	67	39	58	62	60	46	27	69	45	58	49	72	53
50	31	33	42	51	41	44	28	49	21	48	47	46	50	32	45	29	45	36	46	22	33	50	39	32	47	42	52	37	45	45	42	35	48	28	34	30	50	34	50	45	46	46	29	50	38	44	45	54	49
44	40	32	49	56	42	50	48	51	27	43	50	52	56	57	50	36	44	29	49	38	37	51	33	43	44	59	45	59	46	54	64	27	48	37	47	42	41	56	52	48	38	44	42	48	35	46	48	45	55
54	40	30	45	60	47	63	35	51	27	60	52	49	64	43	60	36	72	49	62	28	48	67	45	46	59	49	49	43	59	60	54	38	52	33	48	40	46	50	73	55	50	57	41	54	53	55	37	52	50
59	46	38	50	54	52	52	45	63	33	56	68	67	77	56	65	42	49	35	56	36	45	58	40	49	59	55	59	61	55	62	62	40	66	36	51	51	53	50	62	69	49	60	39	66	32	62	49	62	78
79	36	44	50	51	52	52	30	68	27	74	71	62	59	36	57	34	51	33	62	22	49	57	40	43	67	53	63	50	44	50	47	53	64	29	37	35	54	44	56	69	74	51	29	73	45	63	44	63	61
83	38	45	49	55	56	54	32	70	28	76	70	63	64	35	57	34	53	34	63	25	51	57	40	41	70	57	66	54	44	53	47	55	64	30	37	38	53	48	59	72	75	51	30	73	45	66	45	64	57
53	35	37	56	39	44	39	38	55	28	57	56	59	52	40	48	37	36	30	48	30	34	42	39	47	52	57	57	61	32	40	60	37	55	38	35	37	59	57	45	54	51	37	39	57	39	58	62	51	46
51	33	33	38	50	39	49	32	46	22	49	46	47	52	41	55	27	57	37	51	25	39	57	32	31	45	40	42	36	48	52	42	43	45	28	41	34	40	37	58	45	39	52	30	49	38	42	34	46	49
58	42	31	40	62	47	67	41	53	28	56	53	51	60	48	65	38	74	44	61	31	55	72	46	42	54	52	49	45	64	66	48	37	53	34	51	45	45	48	67	57	48	64	39	55	48	49	37	54	57
42	52	18	35	46	42	49	47	42	41	40	46	48	48	52	51	53	51	41	43	41	53	51	48	62	45	49	44	42	57	55	50	22	45	43	56	64	45	47	50	45	36	55	46	40	34	40	43	46	53
41	49	18	40	45	40	48	44	40	39	44	41	44	47	49	48	51	49	47	42	39	52	50	51	64	50	48	41	42	55	53	53	21	42	41	53	60	42	55	49	44	39	54	52	38	39	45	41	43	48
46	19	58	34	27	33	25	13	45	9	46	48	43	42	18	38	13	20	14	36	7	23	28	20	21	41	28	41	35	20	25	30	67	49	12	14	14	38	24	32	49	42	26	17	51	21	45	30	48	35
64	26	44	64	47	43	48	23	58	21	69	60	56	50	27	44	29	46	34	57	18	40	49	34	41	66	44	54	44	39	44	44	43	56	22	32	29	48	51	47	61	76	39	28	63	68	60	37	53	45
48	42	23	38	41	36	44	42	42	37	52	43	44	38	41	45	44	56	39	46	36	42	48	41	48	48	52	39	45	39	47	51	29	38	43	42	47	35	57	45	41	44	39	53	43	49	46	41	39	40
34	45	18	34	37	30	37	50	35	33	32	32	35	38	45	38	38	41	40	32	40	32	43	36	41	31	46	35	42	42	43	47	22	38	50	46	42	40	41	39	34	34	45	48	34	31	30	47	43	42
26	34	23	26	27	23	26	31	32	22	25	27	31	31	27	33	23	25	23	25	20	29	31	28	29	26	28	26	24	32	29	27	25	35	28	28	27	29	23	30	29	23	39	28	29	17	26	26	34	33
28	67	12	27	30	29	31	52	31	63	27	28	32	29	47	33	49	33	42	30	61	35	38	38	47	25	41	30	43	39	40	40	14	28	94	47	52	35	42	34	28	23	39	54	28	24	26	52	29	34
39	68	20	38	40	39	42	49	42	55	37	41	45	44	55	45	57	40	38	40	56	48	48	42	60	39	54	42	58	52	50	52	20	44	75	56	61	47	54	45	44	34	56	51	40	30	38	56	40	48
42	47	26	39	52	49	50	40	48	31	40	50	48	52	48	61	40	43	37	48	29	61	52	55	47	45	43	44	40	67	50	47	22	56	34	46	47	48	42	52	50	39	60	38	46	39	46	38	49	49
56	44	37	54	65	42	55	38	61	31	54	57	60	64	50	49	38	53	37	51	34	39	59	35	45	48	53	55	53	51	66	54	37	50	36	57	48	45	49	58	55	50	50	40	59	42	55	46	52	65
41	52	15	32	44	41	43	53	37	49	39	38	42	39	49	40	62	56	31	43	52	53	42	36	50	44	64	37	60	42	44	48	20	37	53	47	61	32	63	43	43	31	43	48	36	36	36	44	35	39
54	39	38	53	60	43	56	43	57	29	52	55	59	60	47	48	39	57	37	54	36	41	62	33	43	50	56	55	54	50	63	56	36	49	37	52	46	45	50	61	53	47	50	39	56	41	51	48	52	59
35	24	34	34	33	34	30	24	39	13	34	39	38	40	26	40	19	23	20	33	17	21	35	26	25	33	36	41	34	24	33	40	37	41	24	22	23	52	26	39	35	30	29	22	38	17	37	47	41	36
38	45	19	36	34	33	36	51	39	41	36	38	43	38	52	43	49	37	31	36	43	45	40	35	53	34	56	35	52	42	40	49	18	42	48	44	59	39	52	36	39	34	46	48	37	34	36	47	38	38
54	46	36	51	47	48	47	42	59	36	52	59	62	64	50	50	43	41	25	50	40	40	45	35	45	54	70	53	89	40	47	64	35	54	43	43	43	44	63	50	65	42	42	40	56	31	57	56	48	53
40	41	17	35	40	40	42	43	38	32	44	41	41	45	37	45	37	46	54	37	34	43	46	62	44	47	36	46	33	48	42	45	20	40	37	38	41	42	40	46	41	38	55	47	38	37	42	37	40	45
57	36	39	54	50	51	47	33	66	24	61	65	64	68	42	57	34	42	40	53	24	41	51	50	45	59	50	63	52	47	50	56	40	59	33	37	36	64	47	55	61	52	50	35	63	37	69	55	56	58
39	47	22	41	38	40	39	51	43	36	38	42	44	43	55	46	44	40	30	41	38	45	41	40	54	43	59	39	54	45	40	54	24	50	44	46	51	43	52	40	45	40	48	47	42	34	38	47	50	44
54	43	35	48	44	51	51	41	56	35	51	58	61	58	48	48	41	40	23	49	39	40	43	33	44	54	67	54	87	37	45	61	34	51	40	40	41	42	63	48	64	42	41	37	55	30	55	51	46	54
61	38	35	41	65	59	63	36	57	24	58	58	55	67	42	66	38	66	43	67	28	45	67	48	36	59	51	63	48	53	61	55	42	54	32	43	39	52	48	75	59	46	54	33	58	41	54	44	56	54
53	44	36	46	74	52	70	41	57	28	50	60	56	66	51	68	37	61	45	66	31	52	85	47	43	50	50	56	45	67	80	58	32	55	36	51	45	50	48	81	55	46	65	38	58	42	52	43	53	64
58	40	42	52	56	62	53	32	62	27	54	72	63	67	38	73	35	42	31	69	23	49	58	42	46	63	47	63	50	52	54	58	39	84	29	36	39	66	47	64	66	54	51	31	68	45	64	50	72	57
61	45	37	47	55	66	56	35	61	31	57	72	63	68	39	75	36	45	35	68	26	52	61	45	47	65	49	62	52	53	56	58	42	80	32	38	41	63	49	67	68	54	54	35	68	40	64	51	72	59
42	61	21	37	42	42	45	53	44	48	40	44	47	47	57	48	57	43	42	43	48	53	53	45	61	42	57	45	56	56	52	56	21	48	66	56	60	50	56	49	47	37	61	55	43	33	41	59	44	48
60	44	33	43	64	63	65	42	59	30	55	66	62	73	46	89	40	56	39	69	31	56	69	50	45	62	52	61	52	61	64	59	35	70	33	45	52	57	54	75	66	44	62	39	63	39	61	45	61	59
33	55	14	27	35	29	35	62	33	50	30	32	35	38	57	37	46	38	40	30	65	32	38	38	46	28	46	31	42	43	43	48	16	32	61	57	54	32	40	37	31	25	43	55	31	22	29	46	30	47
32	43	16	29	39	31	35	45	34	33	30	31	34	35	37	36	35	37	47	30	36	35	43	43	35	27	34	36	30	42	45	35	18	31	48	41	42	41	31	40	30	28	42	45	31	26	29	42	32	41
57	39	45	57	49	47	44	31	65	31	55	61	64	56	39	49	40	38	27	57	27	36	48	35	44	51	53	65	58	36	47	53	41	59	36	41	40	63	47	52	57	52	38	30	67	38	58	59	54	52
40	47	22	40	43	35	43	53	41	34	44	39	40	44	57	43	44	43	46	40	45	41	46	42	55	41	51	36	49	50	47	60	22	38	44	55	48	37	53	47	40	37	56	63	39	34	42	46	36	49
67	42	38	49	52	46	49	47	62	31	64	62	63	65	49	55	37	53	32	53	39	39	55	35	43	59	68	57	68	44	52	65	45	56	40	44	44	47	56	58	62	52	48	40	63	36	57	54	58	59
51	44	24	34	43	37	45	45	43	38	48	46	47	39	44	45	45	56	34	46	38	42	48	38	43	42	55	43	46	39	48	47	30	38	44	43	51	35	52	45	41	38	39	48	43	43	41	42	39	43
30	51	15	30	39	28	35	56	33	40	29	30	34	35	47	34	40	39	44	29	51	32	41	36	41	27	44	30	40	42	42	46	17	30	58	49	47	34	39	39	28	28	41	56	31	25	28	48	31	41
44	44	23	44	60	42	54	50	45	38	41	43	51	49	54	46	51	57	33	49	48	43	55	32	45	43	60	42	58	45	62	55	23	39	41	62	54	34	63	56	45	36	47	44	43	34	40	41	37	55
50	20	70	43	40	37	39	16	59	11	48	56	49	51	21	44	19	33	19	52	10	25	40	26	24	43	35	56	39	28	36	36	59	52	19	22	19	52	28	47	51	42	32	16	60	29	51	40	49	40
57	35	27	36	44	46	48	31	47	30	55	53	48	44	32	52	38	63	37	59	24	50	53	38	36	53	43	48	36	42	48	37	39	48	31	36	40	43	39	55	50	44	42	30	54	50	48	36	48	40
48	42	23	33	41	42	50	42	42	37	46	43	44	38	41	45	44	56	33	46	36	42	48	34	41	42	52	39	45	39	47	44	29	38	43	42	47	35	50	45	41	38	39	46	43	42	40	41	39	40
29	49	15	29	38	27	33	56	31	40	28	28	32	34	48	33	39	37	42	28	52	31	40	35	40	25	42	30	39	40	43	45	17	28	59	49	48	32	38	37	27	26	40	54	29	24	27	46	29	41
51	42	30	42	52	38	46	45	50	31	49	47	51	51	48	44	36	50	35	45	40	35	53	34	42	47	60	46	53	47	51	58	32	43	42	45	42	37	51	51	45	43	47	44	49	36	44	52	47	53
72	35	51	56	60	50	53	28	75	25	69	71	64	60	33	52	33	50	31	68	21	48	56	36	39	62	51	65	51	45	51	46	51	62	27	36	35	51	47	57	69	67	46	29	79	52	66	43	62	55
50	51	31	47	64	51	64	50	51	36	48	53	55	59	56	61	46	56	37	65	42	45	70	36	47	51	63	53	64	50	71	68	31	52	48	56	52	46	65	81	54	39	51	50	53	37	49	55	48	54
51	42	32	43	47	37	40	46	52	33	49	49	53	49	45	42	36	41	30	43	39	35	45	35	41	46	63	47	54	40	45	56	37	44	43	42	40	39	48	45	45	42	43	44	51	34	46	57	49	50
42	50	20	41	51	47	54	40	44	36	47	47	44	51	45	57	47	51	53	53	32	66	61	64	61	54	41	44	39	72	54	51	18	51	39	49	50	46	55	56	52	43	64	54	45	46	51	37	45	45
59	37	42	55	61	50	60	30	63	24	56	61	59	62	34	50	31	52	34	54	24	41	59	36	39	51	48	58	48	49	55	48	40	57	29	40	36	50	43	58	58	56	48	33	63	48	57	41	59	54
57	18	59	34	30	35	31	13	48	9	55	47	42	40	17	35	12	27	15	39	7	21	31	17	18	45	34	42	33	19	27	28	81	45	13	17	13	36	23	35	46	54	23	15	54	25	43	29	48	35
58	22	52	41	35	42	36	18	54	15	56	52	47	45	22	40	25	32	26	46	12	33	38	31	27	44	34	55	41	27	34	32	57	50	21	23	21	56	31	41	57	50	33	18	57	30	47	42	48	40
74	29	46	53	58	55	52	29	67	22	70	71	66	62	32	51	33	49	28	69	21	45	52	37	34	70	52	71	53	39	49	45	51	58	26	34	32	55	48	60	69	61	42	25	75	42	66	47	55	52
45	39	32	48	56	42	50	48	51	27	43	49	51	55	57	50	36	44	29	48	38	37	51	33	43	44	59	45	59	47	54	64	27	47	37	47	42	40	56	51	49	38	45	42	48	35	46	48	44	55
33	41	16	31	39	32	37	45	35	33	31	32	36	37	40	38	36	38	48	31	38	36	44	45	36	28	35	37	32	43	48	36	18	32	48	43	44	42	33	40	30	29	43	45	32	27	30	44	33	43
51	40	36	62	40	45	39	41	58	32	55	56	64	56	45	51	38	35	27	46	35	37	41	36	53	56	62	52	70	35	42	67	37	60	37	38	41	48	59	45	58	51	39	41	56	37	60	51	53	51
56	47	39	51	56	46	51	46	57	35	52	60	63	65	52	53	38	47	33	56	43	35	54	35	42	50	59	62	69	44	57	65	37	52	45	49	45	45	57	61	55	43	47	43	61	33	57	57	50	58
50	56	27	37	49	43	48	41	53	35	48	50	47	53	42	58	38	50	48	48	31	52	57	51	45	46	44	46	39	60	52	45	31	54	43	44	44	47	37	55	50	42	68	44	51	39	46	45	58	53
30	57	13	29	29	29	30	55	33	59	29	29	35	32	44	34	48	32	40	29	63	35	37	38	47	27	44	31	42	38	39	43	15	31	74	48	51	35	43	33	30	25	41	55	30	24	27	52	32	37
46	46	26	50	50	53	48	41	48	40	51	51	56	51	50	53	50	44	31	56	36	48	47	41	57	59	55	49	59	38	51	58	28	49	37	46	53	40	72	54	55	41	41	42	49	40	56	44	44	49
52	45	27	46	62	51	66	47	51	37	49	51	55	57	51	58	48	59	40	61	40	49	68	38	47	52	50	48	52	54	73	54	27	50	37	60	56	41	64	68	57	44	52	41	52	41	46	39	46	61
54	39	32	43	68	53	85	36	53	28	51	53	51	59	40	62	41	66	41	68	29	55	77	42	44	54	49	53	50	60	72	49	30	53	32	49	47	47	54	78	61	45	56	37	54	43	49	42	48	53
44	39	32	49	56	42	49	48	51	27	42	50	52	56	58	51	35	44	29	48	38	37	51	33	42	44	59	45	59	46	54	64	27	48	37	47	42	41	56	52	48	38	44	42	48	35	46	48	45	56
56	35	33	42	55	45	49	32	53	24	53	53	51	55	37	49	33	50	40	50	26	38	55	44	35	52	46	58	41	50	51	46	36	48	32	38	35	50	38	55	50	45	50	33	55	38	48	49	53	53
44	40	28	48	46	39	47	43	45	34	47	44	46	50	44	42	40	44	41	43	45	34	51	38	48	46	52	48	54	41	51	60	26	43	43	51	43	50	60	50	46	43	44	49	44	38	46	59	40	51
34	59	14	36	45	36	45	55	36	46	38	37	40	44	55	48	57	46	50	39	48	48	51	49	76	41	45	35	42	60	52	60	15	40	49	69	64	37	53	48	39	35	56	62	35	34	40	40	36	51
27	53	7	23	26	33	35	47	28	65	26	26	32	25	37	30	49	30	31	28	50	37	30	33	45	26	34	26	32	33	34	31	10	25	51	44	58	23	40	29	27	20	32	42	26	22	24	35	23	30
71	37	39	46	54	61	60	33	60	29	68	71	64	60	36	70	37	62	34	78	24	55	63	42	40	70	51	65	49	48	56	49	51	66	30	39	40	55	52	70	68	56	48	31	72	50	63	43	64	51
62	43	39	51	49	53	53	47	64	35	59	63	66	64	48	55	45	47	27	57	38	46	50	36	50	61	74	59	85	43	50	66	38	61	39	41	46	49	71	55	77	48	47	42	63	35	59	54	53	56
57	36	41	66	59	42	52	29	60	23	61	58	57	59	33	48	30	50	39	52	23	40	57	40	45	57	47	55	46	48	53	52	39	55	28	39	35	49	48	56	56	61	46	37	61	61	65	40	58	52
50	39	35	48	55	43	50	40	52	29	48	51	52	56	43	45	39	52	36	51	36	36	54	36	43	46	55	57	56	44	52	59	35	46	41	45	42	48	48	57	49	42	46	39	52	37	48	61	46	51
24	52	6	24	30	26	30	69	26	65	23	24	31	30	51	31	46	36	37	25	89	33	34	32	42	24	39	24	38	38	36	42	9	24	58	55	56	22	44	32	26	18	38	57	24	20	23	39	23	38
45	44	22	36	53	45	48	47	47	31	43	43	48	50	46	49	41	49	46	43	35	50	49	52	42	42	44	48	37	54	49	43	25	42	39	51	43	48	39	51	43	35	53	38	43	29	41	42	41	51
61	38	34	45	52	61	52	33	56	28	58	63	58	58	35	65	36	47	37	64	24	48	58	47	40	62	48	64	47	46	53	49	44	71	33	37	37	62	46	62	62	56	50	33	65	41	57	50	75	53
53	45	34	51	48	46	47	52	57	32	57	58	62	66	53	58	39	43	36	47	40	40	51	42	53	58	67	53	68	45	50	77	36	57	40	46	47	47	60	55	58	47	49	51	57	34	61	56	52	58
50	51	26	39	68	47	58	48	51	32	47	52	49	60	50	59	45	62	51	52	36	63	65	49	53	48	50	49	42	67	62	54	26	52	39	61	54	49	42	66	50	39	69	43	50	37	48	41	47	55
50	51	26	39	68	47	58	48	51	32	47	52	49	60	50	59	45	62	51	52	36	63	65	49	53	48	50	49	42	67	62	54	26	52	39	61	54	49	42	66	50	39	69	43	50	37	48	41	47	55
49	50	26	38	69	47	59	48	51	32	47	51	49	61	51	59	46	63	50	54	35	64	66	49	52	48	51	48	43	69	63	53	25	51	39	60	54	49	43	67	51	39	70	42	49	36	47	41	46	55
53	40	29	40	48	48	50	36	51	30	51	54	51	58	40	51	46	50	54	45	30	49	56	45	49	49	47	56	42	58	52	47	33	52	36	47	44	55	37	53	54	49	62	37	51	35	47	45	52	57
63	32	54	61	56	48	57	25	68	25	61	67	61	58	30	50	33	48	30	66	20	46	63	33	41	55	45	67	50	47	55	43	43	65	26	36	34	56	45	61	68	63	45	27	71	53	62	44	57	51
60	47	35	48	56	63	56	41	61	33	57	72	67	68	45	74	39	52	39	69	30	54	66	49	50	63	50	67	52	57	60	61	38	76	36	43	44	63	52	70	69	51	59	38	67	41	61	50	70	65
46	17	69	42	33	33	32	13	53	8	46	52	47	47	20	43	14	26	17	44	7	23	36	21	25	40	33	45	36	26	32	34	63	57	14	20	16	47	25	40	48	45	30	15	57	29	48	36	51	39
62	38	43	50	77	50	64	37	64	24	57	64	61	69	44	55	36	62	38	62	29	49	64	41	40	54	53	66	51	53	61	53	39	53	29	46	41	47	47	69	61	47	58	33	62	40	59	43	50	60
64	33	43	48	50	48	51	29	61	22	61	64	58	65	36	58	33	50	32	52	22	40	54	45	37	59	55	65	50	44	51	48	48	61	30	34	34	60	42	54	61	59	46	28	62	41	60	46	63	57
44	46	19	32	58	46	56	46	42	32	42	45	44	56	50	54	47	66	46	48	36	63	60	49	48	47	48	41	39	75	57	48	23	44	36	56	53	41	44	58	47	36	70	44	43	38	42	35	47	52
45	43	19	30	45	39	48	47	43	36	42	44	43	45	43	51	38	56	46	42	39	48	52	48	40	41	40	42	35	51	50	39	24	42	39	41	52	37	39	49	43	35	57	46	42	36	40	34	45	51
73	35	37	37	48	46	53	33	56	31	69	56	51	48	32	47	38	68	37	59	26	50	52	40	37	61	51	54	43	42	48	37	47	47	30	37	41	39	45	54	58	57	42	31	60	52	52	33	49	44
62	31	45	56	47	53	47	31	67	22	59	72	68	66	36	59	33	42	29	57	22	44	50	41	38	58	52	69	55	39	46	49	44	67	29	32	34	72	44	54	66	53	45	26	67	39	65	54	60	54
78	36	66	56	54	52	54	29	86	27	74	79	70	63	36	57	32	47	33	73	22	46	56	41	40	60	48	74	54	44	51	48	55	64	29	35	33	54	44	61	76	58	48	29	83	44	69	48	56	57
56	42	31	41	62	49	66	37	53	28	54	56	53	64	44	63	39	78	44	65	29	54	70	43	45	55	51	53	46	62	63	53	40	54	34	49	43	48	45	76	58	45	61	37	56	48	49	38	54	54
56	37	38	46	67	64	89	35	59	25	54	61	56	63	41	68	36	58	37	78	26	48	70	42	38	58	46	59	48	57	65	52	36	59	30	45	40	50	51	79	62	43	53	34	63	42	55	42	53	52
73	39	41	44	57	47	60	34	64	27	69	64	60	60	40	59	35	63	37	60	26	49	62	46	43	63	59	61	49	49	57	48	50	57	32	42	41	48	45	63	61	58	52	33	64	45	57	40	59	56
66	43	43	49	50	50	46	45	66	35	63	66	67	61	47	53	40	42	29	57	38	42	46	38	44	57	66	60	69	38	47	60	46	55	41	43	45	46	61	53	60	50	40	40	68	32	64	58	52	56
70	35	45	47	56	56	54	31	68	26	67	67	63	65	36	60	39	49	35	60	24	50	54	46	43	60	54	70	56	44	51	49	45	63	32	39	40	67	47	59	70	52	51	30	67	37	62	52	56	53
70	35	45	47	57	56	54	32	68	26	67	67	63	65	36	60	39	50	35	60	24	50	54	46	43	60	54	69	56	44	51	49	45	63	32	39	40	65	47	59	70	52	51	30	67	37	62	52	56	53
68	34	43	46	57	57	53	32	66	25	64	64	60	64	35	57	41	52	34	58	24	51	52	45	42	61	56	67	55	43	50	47	43	61	31	39	39	62	47	57	68	50	50	29	65	35	61	51	53	53
76	38	60	62	57	52	53	33	98	29	72	78	76	67	41	60	34	46	33	67	25	46	55	42	42	59	54	68	58	45	53	50	51	63	31	37	38	54	46	60	72	57	49	29	82	42	72	49	57	58
52	43	38	48	49	41	51	50	56	33	50	53	55	53	52	44	40	46	35	50	44	37	54	34	46	45	59	55	60	45	54	61	33	46	41	51	47	40	54	52	52	44	46	50	55	34	50	51	44	58
76	37	42	54	51	54	52	31	66	27	82	67	59	58	33	53	33	50	39	60	23	48	54	44	46	76	54	62	51	43	49	50	52	62	28	36	35	51	51	57	69	81	47	34	70	50	71	43	61	56
33	62	11	29	32	32	34	58	34	57	31	32	37	33	57	37	52	41	37	32	66	40	38	39	48	32	49	30	52	41	42	45	15	31	69	48	60	29	50	35	33	25	41	57	31	28	30	44	33	41
22	32	16	18	23	17	21	28	22	23	21	20	22	22	24	24	23	30	26	20	23	26	27	23	25	20	23	19	20	29	25	23	20	23	32	24	28	22	21	23	20	21	30	30	20	21	18	23	30	24
67	35	50	57	60	54	60	28	70	27	64	75	66	64	35	55	36	55	32	75	23	52	63	37	42	63	50	71	52	49	57	48	48	62	28	37	37	56	48	68	71	58	50	28	75	51	67	47	60	54
45	49	26	41	52	44	51	39	50	34	43	47	47	48	46	48	43	49	44	50	33	56	55	42	54	41	45	45	42	61	51	46	24	48	43	50	50	46	41	50	46	39	58	43	48	40	43	43	44	48
44	47	27	43	48	42	49	37	48	32	41	46	46	45	44	47	40	46	42	48	31	52	54	40	51	39	42	43	39	59	50	43	24	50	41	47	46	49	40	49	44	41	55	41	47	42	42	42	46	46
34	61	13	31	34	33	36	58	36	50	34	36	38	34	56	39	48	44	41	35	57	40	39	43	47	34	51	31	52	42	41	48	17	32	62	47	53	31	51	38	34	28	43	57	34	32	34	46	35	43
51	45	37	51	55	46	52	33	59	31	49	57	56	56	43	54	40	57	38	58	28	45	58	38	49	48	48	50	44	53	55	48	35	56	38	46	43	51	43	58	53	47	50	34	58	53	51	43	56	54
54	35	35	44	61	58	57	32	55	23	51	56	53	62	38	57	40	50	43	58	24	42	61	42	38	54	47	63	48	47	58	52	35	57	30	41	36	60	43	69	58	44	50	31	58	34	52	50	54	55
40	43	19	34	52	46	66	37	41	30	39	41	38	46	42	53	42	51	52	48	30	53	68	46	46	37	38	41	34	64	62	40	19	44	42	52	46	50	37	60	43	37	60	42	42	36	37	40	41	44
46	45	22	40	53	48	54	36	46	31	51	51	47	52	43	60	42	52	46	53	29	57	58	55	58	54	45	46	41	58	55	55	26	52	34	46	48	46	48	60	48	45	60	44	47	45	52	39	52	48
63	36	50	58	59	46	60	28	66	24	60	64	60	63	33	53	32	55	34	62	22	43	64	37	41	54	49	64	50	53	58	47	45	64	30	39	35	56	44	64	64	61	50	31	67	53	60	43	67	54
38	66	14	33	41	36	38	57	36	58	36	37	42	40	50	42	45	42	35	37	62	40	43	43	45	37	52	36	52	42	44	50	18	37	62	49	52	32	54	43	36	29	41	53	35	29	34	48	37	39
56	44	34	47	75	61	73	44	59	29	53	63	59	72	48	69	40	64	43	70	33	56	76	48	43	59	53	59	52	69	69	60	31	60	35	49	45	51	58	78	67	46	62	40	60	45	57	42	54	62
60	41	37	47	59	42	50	45	58	29	58	56	57	65	55	50	37	50	30	51	36	36	52	34	43	54	71	51	63	42	54	62	40	48	38	46	43	41	54	57	55	47	44	39	56	32	55	49	47	56
53	45	40	54	60	42	56	49	62	32	51	56	59	63	55	49	40	52	35	54	41	41	59	36	48	46	65	57	68	52	59	65	35	49	42	51	48	44	58	60	56	45	54	44	58	37	54	56	47	60
40	44	25	36	41	46	44	48	44	32	38	44	45	43	48	44	37	36	36	37	38	35	44	41	44	35	51	41	47	41	45	53	26	40	45	43	38	41	42	44	39	33	42	44	41	27	39	51	40	50
72	34	55	60	62	59	55	30	80	25	69	80	71	69	37	61	35	47	31	74	22	51	57	38	41	66	53	73	59	46	52	53	50	70	27	37	37	58	48	63	77	63	51	28	88	47	74	49	62	57
58	38	31	44	48	40	55	32	51	28	64	51	48	53	37	56	34	59	46	49	27	44	63	46	48	60	51	48	42	53	57	48	38	53	33	42	40	47	44	57	53	58	53	42	52	49	55	37	54	50
46	40	27	47	43	51	44	42	48	33	51	47	48	45	43	50	43	38	37	55	33	40	46	44	51	52	53	51	54	37	44	61	32	50	42	40	41	53	60	51	48	46	37	46	50	39	48	59	47	43
62	33	58	46	52	48	50	24	65	18	59	67	60	65	32	59	25	40	26	58	17	36	52	35	33	53	45	61	48	39	48	47	60	61	23	31	29	50	37	58	60	52	43	25	69	31	63	43	59	54
35	57	15	40	41	37	44	48	37	46	40	37	40	41	53	45	58	42	43	41	43	50	48	48	74	43	48	35	44	54	51	52	15	41	48	62	60	37	59	46	42	35	50	63	36	37	43	41	36	45
75	38	52	51	61	55	64	34	73	25	70	75	69	75	41	77	34	54	37	69	26	47	67	42	42	63	53	70	56	51	62	55	54	71	31	42	42	59	47	74	71	57	57	34	77	39	70	48	65	64
65	43	41	51	49	49	46	46	65	35	62	63	66	57	48	53	42	42	29	55	38	40	47	37	44	55	66	58	71	36	49	58	45	55	41	44	43	46	60	55	60	50	39	41	66	32	60	57	52	56
49	40	33	54	55	44	46	43	53	30	47	52	57	54	46	44	40	42	33	49	40	36	48	37	42	44	56	56	67	40	51	62	30	44	43	52	41	47	52	52	49	40	41	39	52	33	48	57	42	52
75	29	49	46	43	54	51	24	63	22	72	62	57	54	29	51	27	46	29	59	18	39	47	31	32	62	47	59	46	35	43	40	68	59	24	30	27	49	37	52	63	69	39	24	70	41	57	41	65	48
69	34	49	52	54	62	53	31	68	25	65	81	74	66	36	59	36	45	32	72	23	47	55	48	40	64	49	97	54	43	51	52	46	65	30	34	36	62	48	62	71	54	45	28	76	41	73	52	58	55
63	40	48	55	55	48	52	40	69	32	60	66	69	60	49	52	42	46	27	67	33	42	54	34	44	56	67	64	73	40	55	60	45	56	39	43	42	47	62	61	64	49	42	38	71	36	62	58	51	54
72	36	51	58	58	60	54	34	78	27	68	96	87	74	43	67	34	48	31	71	25	50	57	46	42	66	54	79	59	46	52	56	48	69	30	36	38	59	50	63	74	56	51	31	84	43	83	52	62	63
67	34	43	46	54	54	53	30	65	25	64	67	62	63	36	57	38	48	34	59	23	48	52	47	45	59	52	69	54	43	49	49	43	62	31	38	38	65	45	58	69	51	49	29	66	36	60	51	55	55
52	41	36	45	51	57	51	36	56	27	50	61	57	61	44	80	35	47	34	62	26	49	61	43	41	54	46	53	48	54	56	55	36	70	32	38	43	57	47	63	61	48	57	34	58	39	55	43	67	57
53	43	34	51	51	41	47	48	57	32	51	54	59	63	54	49	38	44	30	49	40	33	48	31	44	49	62	50	66	41	51	65	36	50	40	50	42	42	53	54	54	42	44	40	56	30	52	50	48	61
57	38	32	41	52	85	56	34	56	28	54	63	58	56	40	66	48	45	41	67	25	54	52	52	38	61	44	65	48	48	50	49	35	60	30	35	39	52	50	60	62	43	47	31	60	36	57	45	52	49
50	44	33	47	48	44	44	45	53	36	47	55	59	64	54	53	38	41	30	48	44	37	48	35	43	48	58	52	72	48	49	67	33	53	41	48	43	43	53	52	56	39	50	42	55	28	53	60	50	58
57	41	34	53	77	56	70	43	61	28	55	59	62	66	45	67	38	59	40	71	31	50	74	41	41	57	53	57	51	54	71	57	35	57	35	51	45	50	53	84	59	45	54	38	60	41	55	44	53	55
65	37	51	56	68	52	63	35	72	25	62	70	65	77	42	63	34	59	40	73	26	46	69	40	41	59	50	70	55	61	62	58	46	66	30	44	39	56	45	75	70	53	63	33	75	43	65	47	63	64
44	44	25	40	47	54	51	48	45	32	43	43	45	49	48	51	40	42	39	50	39	36	49	39	42	42	50	48	51	42	48	60	30	46	44	47	42	48	51	55	44	36	42	45	46	30	40	56	45	47
51	46	31	45	49	48	48	44	58	29	48	57	56	59	49	63	38	43	36	49	29	55	53	48	49	52	54	50	48	56	50	50	31	64	36	41	44	54	44	52	57	46	65	39	53	36	53	43	60	58
52	46	33	48	51	45	50	48	56	34	50	54	57	67	54	52	40	46	30	47	44	39	50	33	44	52	69	50	85	44	51	67	33	51	44	47	45	42	61	54	62	40	48	42	53	29	52	52	47	58
56	42	37	53	58	52	55	39	60	27	60	63	59	70	46	64	34	49	43	55	28	46	61	53	51	64	50	58	51	62	57	63	35	68	30	42	41	54	52	61	65	59	63	41	61	45	65	44	64	70
55	43	33	43	78	56	80	40	54	27	51	57	53	65	46	65	40	69	42	68	31	56	78	45	43	56	51	57	49	62	73	56	31	54	33	52	46	47	54	82	60	43	63	36	54	42	51	39	49	58
56	42	39	54	50	46	50	41	59	36	54	59	63	56	49	47	42	44	26	56	41	40	50	33	43	51	67	56	84	36	52	60	37	49	42	43	42	43	62	55	62	43	40	38	57	32	53	52	45	52
51	44	34	49	49	45	46	51	56	31	52	57	58	68	59	56	39	43	34	47	38	40	50	38	51	54	62	51	69	48	51	71	35	55	39	49	47	45	59	55	58	44	53	47	55	30	58	55	52	63
47	40	25	45	46	44	42	43	44	30	51	42	44	47	44	45	36	42	41	47	37	32	47	40	44	50	53	46	49	38	45	61	33	44	40	43	38	45	52	52	42	45	39	48	45	34	43	54	47	46
60	42	38	47	56	46	53	50	60	31	57	57	60	65	52	56	40	49	35	51	41	41	54	37	46	52	65	53	68	48	55	66	38	54	40	52	47	47	55	59	60	44	52	45	57	31	54	54	51	59
62	39	37	46	61	58	58	39	61	25	59	66	63	74	40	66	35	53	41	61	29	44	64	48	41	62	51	73	53	53	59	58	39	68	35	43	41	69	47	70	66	48	56	35	65	36	62	56	62	62
69	34	50	55	54	54	50	28	70	23	74	79	69	66	34	58	30	44	32	68	21	43	52	43	41	70	49	74	54	41	48	55	47	62	25	31	34	52	50	59	69	58	44	33	76	45	84	45	56	54
67	42	42	53	52	47	48	46	67	35	64	63	66	58	49	51	41	44	28	55	38	41	49	36	44	55	71	58	74	36	52	59	43	53	40	44	44	45	64	55	62	50	40	41	66	33	61	54	49	55
51	42	37	46	50	45	48	41	58	29	50	58	60	59	60	55	36	45	36	49	33	41	54	40	43	48	49	52	48	51	61	52	37	55	35	50	44	46	42	53	54	46	56	37	56	30	51	46	55	85
50	41	36	44	50	50	53	40	57	28	49	54	56	58	57	54	35	44	35	47	33	39	52	38	40	46	48	49	47	49	60	50	35	53	34	48	44	44	42	51	52	44	54	36	54	29	51	44	53	79
36	63	18	35	56	38	48	54	39	46	33	39	43	50	68	48	52	46	35	41	56	47	48	42	52	37	55	37	54	62	53	57	16	37	58	60	61	34	52	49	39	27	57	50	37	28	37	47	35	50
64	31	49	53	49	57	47	27	66	21	61	78	67	67	34	59	32	41	28	61	19	45	50	42	36	60	47	72	52	40	46	49	45	68	27	31	32	73	43	55	69	55	45	25	72	41	70	54	60	54
64	35	45	52	72	53	65	36	68	23	61	72	67	72	42	59	32	52	35	66	26	42	62	42	38	61	50	66	54	51	60	54	42	59	29	43	37	50	47	71	66	51	51	33	72	38	64	45	56	62
74	35	54	60	63	60	56	31	80	26	70	88	79	71	39	63	34	48	31	77	23	50	58	43	42	69	53	79	58	47	54	55	49	70	27	37	37	58	50	66	77	60	48	28	85	47	78	49	62	61
59	42	38	47	57	45	52	50	60	30	57	56	59	64	52	56	41	50	35	51	40	42	53	36	46	51	66	53	68	47	54	67	38	54	40	51	48	47	55	58	59	44	53	45	57	31	53	53	50	58
47	47	23	34	62	49	59	44	46	30	44	50	47	62	52	64	44	64	45	53	33	59	63	47	47	50	49	44	41	67	60	51	27	50	35	55	51	45	43	66	50	37	69	41	47	37	46	38	51	55
66	44	42	48	61	48	56	42	64	31	63	63	63	70	48	59	42	54	37	56	34	44	59	39	48	56	61	59	63	50	58	62	42	58	36	52	49	50	52	63	65	48	56	40	63	35	59	54	54	63
65	43	40	51	50	48	46	46	65	35	62	63	66	57	48	52	41	42	29	55	38	41	47	37	44	55	68	58	70	36	49	58	45	54	40	44	43	46	61	55	60	50	39	41	66	31	60	56	51	55
58	47	41	52	57	46	51	47	63	34	55	63	65	68	57	55	40	48	33	56	43	38	55	36	43	51	64	59	74	48	57	66	39	53	45	49	45	46	59	60	59	46	50	44	67	34	60	57	51	61
74	32	45	50	55	65	53	29	68	24	71	70	65	69	37	57	41	52	38	65	22	46	53	41	38	67	58	72	57	41	50	48	52	62	27	36	35	55	47	61	73	57	45	27	72	40	65	45	57	53
41	52	20	35	54	45	54	49	47	34	39	47	46	57	57	60	43	52	48	49	36	61	62	52	53	43	44	44	41	78	57	50	20	50	39	52	52	44	42	61	50	34	76	43	43	33	42	39	45	58
59	47	41	52	55	46	48	45	63	34	56	64	65	66	55	53	37	45	32	55	42	36	51	35	42	52	62	59	72	44	54	64	40	53	46	48	43	45	57	56	57	47	47	43	67	33	60	58	51	61
50	40	34	43	45	51	42	30	56	29	48	59	54	52	31	52	35	36	39	53	23	42	47	44	40	48	41	60	40	43	44	45	35	60	37	34	34	77	35	51	52	43	46	32	58	34	53	81	55	47
66	38	47	52	70	58	70	37	69	25	63	73	68	81	45	67	35	58	36	71	28	47	68	42	40	65	55	67	58	53	66	57	45	62	30	45	40	53	51	78	72	50	56	34	70	38	68	46	58	64
34	59	16	33	48	35	46	51	36	46	31	36	40	47	63	45	52	45	35	39	55	47	47	39	52	34	51	35	53	62	50	53	15	35	58	56	60	32	52	46	38	26	54	50	35	28	34	48	32	46
61	35	47	53	53	55	50	28	66	22	58	74	67	71	36	63	33	43	31	58	21	43	53	45	38	57	49	70	52	44	49	53	43	69	31	34	34	75	43	58	65	53	48	28	68	39	67	57	63	55
59	42	38	47	57	45	54	50	60	30	57	56	59	66	53	56	41	50	35	52	40	42	55	36	45	51	66	53	68	49	56	66	38	54	40	51	47	47	56	60	60	44	53	45	57	31	53	53	50	58
61	42	36	46	61	50	63	42	59	29	58	66	64	73	47	64	37	56	41	56	32	49	68	47	48	60	53	61	53	63	63	59	36	67	33	48	45	53	51	65	68	53	64	39	64	38	58	43	62	75
45	51	24	45	57	50	53	50	45	38	47	49	54	60	56	60	48	50	40	54	40	46	55	45	56	56	53	47	54	52	58	70	27	51	40	56	54	43	62	61	51	41	56	49	48	36	51	45	49	61
67	36	39	58	50	50	51	33	66	25	73	74	72	66	39	60	33	52	36	58	24	42	53	47	48	69	55	64	52	42	51	56	49	60	30	37	37	53	49	59	63	59	45	34	66	44	73	45	62	58
45	48	26	46	67	44	62	42	44	37	47	44	47	53	50	50	49	59	41	55	39	43	64	38	54	50	56	44	54	48	70	61	25	43	42	63	53	38	63	66	47	42	48	48	44	40	45	41	39	52
58	41	37	44	72	59	73	40	59	26	55	64	57	74	47	70	36	63	41	75	29	48	74	43	39	63	49	59	50	60	69	58	37	59	32	47	41	51	53	84	64	44	61	37	61	40	58	42	56	63
55	35	32	42	62	80	53	35	55	26	51	63	58	62	38	61	50	50	37	68	24	57	51	46	38	65	49	65	50	46	49	50	33	56	27	36	40	50	54	60	62	42	48	29	59	37	59	43	50	50
57	41	32	44	52	48	53	35	54	27	55	57	53	64	42	61	34	54	37	55	26	46	58	44	43	62	51	53	45	68	52	52	40	67	31	42	39	53	40	59	58	55	61	35	59	43	52	42	67	59
64	43	41	48	59	47	56	41	62	31	61	63	62	68	47	57	42	53	36	56	33	43	57	39	50	55	59	58	62	50	56	63	40	58	35	51	47	50	50	62	65	48	55	40	63	35	57	53	54	64
52	39	36	54	58	47	50	44	56	29	49	56	59	56	45	46	42	45	35	52	38	38	52	39	44	47	56	60	60	43	52	62	32	48	40	51	41	51	52	56	53	43	43	39	57	36	50	58	45	55
59	42	37	46	57	45	52	49	58	31	56	57	59	64	53	55	42	51	34	51	40	42	53	37	49	51	65	54	67	47	54	70	37	53	39	51	48	46	54	58	58	43	53	45	56	31	53	53	50	61
74	32	46	56	48	51	48	27	66	23	78	72	65	61	35	57	30	47	33	59	20	44	51	43	45	73	54	65	52	40	47	53	56	65	25	33	33	54	48	55	68	75	45	30	71	50	72	42	62	56
64	39	43	53	49	53	44	34	68	30	60	75	70	60	33	56	33	38	35	62	26	50	51	42	39	55	44	69	47	44	47	45	44	64	31	36	37	60	41	53	64	55	48	31	77	39	69	55	59	51
58	42	37	46	56	44	52	48	57	30	55	57	59	63	53	54	41	51	34	50	40	41	53	37	49	51	64	53	66	47	53	69	37	53	39	51	47	46	53	57	58	43	53	45	56	31	52	53	50	62
35	63	18	35	56	38	47	55	39	46	33	40	43	50	68	47	52	45	35	41	56	47	47	42	52	36	55	37	54	62	53	57	17	37	58	60	61	34	52	49	38	27	57	50	37	28	37	47	35	50
58	41	40	58	45	49	46	44	61	32	62	60	61	55	44	49	38	40	33	56	35	37	46	37	51	59	62	59	67	35	46	64	44	55	39	41	40	46	61	54	58	56	39	44	61	37	62	55	52	53
72	36	52	56	56	61	57	32	72	27	68	86	78	69	37	62	34	48	31	78	23	50	59	43	43	69	50	88	56	47	53	54	49	71	28	36	37	59	50	67	77	58	48	30	83	44	76	49	63	60
44	45	27	45	47	40	47	46	48	35	42	47	47	46	51	48	43	48	42	48	39	54	54	42	53	41	46	44	44	60	51	47	24	50	45	51	50	49	44	49	46	41	57	45	47	42	43	45	47	52
73	38	54	52	50	56	51	32	78	30	69	80	69	67	37	65	34	44	31	67	24	51	55	44	42	64	49	68	56	49	49	50	49	73	29	34	36	57	45	57	81	56	52	32	82	40	71	49	63	57
44	46	23	40	49	40	50	41	46	31	49	45	42	55	49	57	39	49	58	46	32	56	57	54	52	49	39	41	39	70	52	50	23	50	36	47	45	46	45	55	51	43	83	52	44	39	48	37	46	54
62	36	38	45	58	60	55	32	61	25	59	68	61	65	37	61	38	47	34	66	23	48	54	48	45	65	53	72	52	44	52	54	40	67	30	39	39	65	48	63	65	49	47	30	65	37	61	50	59	58
65	39	33	40	67	48	68	36	55	28	60	55	52	61	40	60	41	80	40	60	29	55	68	42	43	61	61	52	49	56	63	47	40	51	32	47	47	44	50	69	59	51	59	36	55	47	51	36	53	51
62	38	35	44	61	52	58	31	57	26	59	61	56	60	38	58	39	66	33	64	23	55	60	40	44	60	57	55	48	47	56	49	43	56	29	41	40	50	45	69	60	48	50	30	60	46	56	41	54	48
67	36	36	42	60	48	61	31	58	27	64	60	56	58	38	53	41	72	34	60	25	56	60	41	48	63	64	57	51	49	56	46	43	55	31	43	43	48	49	61	63	54	50	31	58	48	54	38	54	50
49	50	25	38	67	46	57	47	50	31	46	52	50	59	50	58	44	61	50	51	35	61	63	50	55	47	50	49	41	66	60	56	25	50	38	60	53	48	42	65	49	38	67	42	49	36	47	41	46	57
57	50	30	42	68	65	63	47	55	31	52	63	59	73	46	82	38	56	44	67	34	53	70	49	43	60	47	60	48	64	65	63	34	67	35	49	47	55	52	79	61	46	65	42	59	37	57	46	63	60
56	43	39	53	45	48	44	41	58	32	53	62	64	61	48	58	41	38	27	51	33	39	48	38	48	51	61	59	71	39	49	64	39	66	43	45	43	60	58	51	60	48	44	41	60	34	57	65	59	54
48	40	33	49	40	43	41	39	51	33	46	55	57	58	47	51	35	34	23	43	39	34	41	32	44	50	60	50	74	35	43	62	34	57	38	41	39	46	53	45	55	41	39	38	52	28	50	52	51	52
60	40	44	54	79	52	65	39	66	25	57	67	62	72	42	59	35	62	40	64	29	47	72	41	41	56	52	65	50	57	66	55	38	57	31	49	41	51	47	76	63	50	56	35	65	43	61	45	53	60
68	37	36	42	60	49	62	31	58	28	64	59	54	58	37	53	42	74	35	62	25	56	61	40	47	64	65	55	51	50	57	45	43	56	31	44	43	49	50	63	64	55	51	32	59	49	54	38	55	49
60	42	32	43	56	43	53	36	56	34	56	52	57	52	44	48	47	64	32	52	32	49	53	37	53	55	68	50	53	44	56	49	38	47	37	48	49	42	51	54	54	46	47	35	50	41	47	41	47	52
62	35	44	56	70	52	63	39	69	23	59	68	65	70	43	58	32	51	34	64	27	41	61	39	37	60	53	62	56	50	59	53	41	58	30	42	37	49	47	69	65	50	50	33	70	37	63	46	54	59
64	38	32	40	66	47	67	35	54	27	59	56	53	60	41	59	40	78	39	59	29	54	67	43	44	60	60	53	48	55	62	48	39	51	32	47	46	44	49	68	58	51	58	36	54	47	51	36	52	52
71	37	50	51	57	47	51	33	70	25	67	70	67	65	38	57	29	49	34	60	24	39	56	41	39	57	51	67	50	45	53	54	54	59	30	37	33	50	40	61	60	54	48	31	71	38	64	48	58	57
68	36	35	42	59	47	61	31	57	27	63	59	55	58	37	53	40	71	34	60	25	53	59	40	49	62	62	56	50	49	55	47	43	55	30	42	42	48	49	61	63	54	51	31	58	48	53	38	54	50
42	40	31	57	40	40	36	38	51	33	45	49	54	47	45	46	35	29	26	45	35	32	39	34	54	49	57	46	57	35	41	63	28	56	35	37	40	47	52	42	46	43	35	43	49	36	50	53	49	45
66	35	40	46	47	52	47	30	58	23	63	61	59	62	34	60	31	46	36	54	22	40	53	43	36	61	51	64	48	45	48	47	53	68	32	35	33	65	40	55	61	63	51	29	64	38	56	51	76	57
65	36	40	46	59	61	55	33	65	26	62	66	62	65	37	63	40	48	35	66	24	52	56	48	44	64	55	71	55	46	53	53	43	69	32	40	41	67	48	65	66	51	49	30	67	37	61	52	60	55
68	36	37	42	61	49	62	31	59	28	65	59	55	58	37	54	41	73	35	61	26	57	61	40	47	64	65	56	51	50	57	46	44	56	31	43	43	48	50	62	64	55	51	32	59	49	55	39	55	49
58	38	32	41	59	58	56	33	56	29	55	55	52	54	36	52	49	57	44	56	26	58	57	46	48	55	54	58	46	49	54	45	33	56	34	45	45	55	47	57	57	47	51	33	55	42	52	44	48	49
71	37	38	45	63	51	60	32	61	27	68	64	60	61	39	57	41	67	34	63	25	58	60	42	47	67	67	59	53	49	56	49	44	59	31	43	42	51	50	64	67	55	52	31	62	46	57	41	55	53
63	36	44	55	58	52	50	35	71	25	60	76	74	66	41	60	31	43	29	62	25	41	54	40	42	56	55	68	55	43	50	56	41	61	31	35	37	52	48	61	63	49	46	31	72	37	67	51	56	54
47	46	31	55	45	44	40	43	55	35	50	54	58	53	52	50	41	33	29	50	38	36	43	38	59	54	63	51	61	39	46	67	29	56	40	42	47	47	57	47	51	43	39	48	54	36	55	57	49	49
42	38	32	54	40	43	36	38	49	27	45	48	51	48	45	46	37	29	29	45	31	33	39	35	52	49	55	50	59	35	40	63	28	56	35	37	39	49	53	42	46	42	36	43	49	36	51	55	49	44
51	45	37	45	41	43	39	50	57	33	49	59	60	59	51	52	35	35	27	43	38	34	43	37	46	48	62	51	64	37	43	64	41	58	43	39	39	47	50	47	54	42	43	43	54	26	53	57	54	57
45	44	25	42	51	39	48	50	44	34	48	43	46	50	53	44	46	51	41	43	44	41	50	38	55	48	63	42	55	47	52	64	25	42	44	56	50	38	58	51	44	41	47	53	43	38	46	50	39	52
62	36	42	54	58	52	50	35	70	25	59	78	74	68	43	61	32	43	29	61	25	41	54	42	42	58	55	67	56	43	51	57	40	60	31	35	37	52	47	60	63	48	46	32	70	36	69	51	56	57
57	45	38	49	51	51	45	46	61	34	54	65	66	65	51	56	46	42	27	51	37	46	47	40	54	56	73	57	74	42	48	73	37	59	40	47	47	49	58	51	62	45	47	43	60	31	60	58	52	58
62	36	42	54	57	52	50	35	70	24	59	80	74	68	42	60	31	43	29	62	25	41	53	42	42	58	54	67	55	43	50	56	40	61	30	35	36	52	47	60	64	49	45	32	71	36	69	50	56	57
67	36	36	42	60	48	61	31	57	28	63	60	56	57	38	52	41	72	34	61	25	55	60	41	48	64	64	57	50	49	56	46	43	55	30	43	42	48	49	62	63	54	50	31	58	48	54	38	54	50
42	40	31	58	39	39	36	37	50	33	45	48	53	47	44	45	34	29	25	44	36	31	38	33	53	49	56	46	58	34	40	63	28	55	36	36	40	47	51	42	46	42	35	42	48	36	50	52	48	44
62	41	44	58	53	49	48	43	68	34	59	68	71	61	49	52	41	43	28	60	36	40	50	35	44	55	67	63	75	39	51	62	42	56	39	44	42	47	62	56	63	50	40	39	72	37	64	58	52	56
64	36	39	46	59	61	55	32	62	25	61	67	61	67	36	62	39	48	34	67	24	50	56	46	43	66	54	71	55	44	53	52	42	69	31	39	40	66	49	65	66	50	48	30	66	37	63	51	60	56
45	49	25	38	52	39	48	50	45	38	43	45	48	50	55	45	48	53	36	43	49	43	50	35	50	43	64	44	60	48	52	60	25	43	50	57	53	38	54	51	44	36	49	47	43	32	41	51	40	54
67	36	36	42	60	48	61	31	58	27	64	60	56	58	38	53	41	72	34	60	25	56	60	41	48	63	64	57	51	49	56	46	43	55	31	43	43	48	49	61	63	54	50	31	58	48	54	38	54	50
73	35	46	49	63	57	59	31	69	25	69	73	68	66	39	63	35	60	31	74	23	48	58	43	43	71	62	70	54	46	55	55	52	65	28	39	39	55	49	67	67	55	47	29	72	46	65	46	63	54
59	41	36	48	49	44	51	42	58	31	56	56	59	59	51	50	39	49	27	50	36	37	49	35	45	56	70	54	75	40	51	62	42	50	39	46	43	43	59	53	61	47	44	40	54	33	52	53	52	56
68	36	41	47	65	54	61	36	64	23	65	71	64	79	42	63	34	62	36	61	27	44	59	40	41	69	58	63	55	49	56	58	46	60	28	44	39	52	48	69	67	52	54	32	66	38	63	43	58	63
61	39	44	52	47	48	48	39	62	31	63	64	63	58	45	53	40	42	31	58	32	40	49	38	51	60	64	61	70	37	48	70	45	57	37	42	41	49	60	55	61	53	42	41	64	37	63	55	52	56
49	58	26	40	59	56	54	59	48	40	45	54	57	63	59	69	46	49	38	56	49	45	59	41	49	52	60	52	61	53	60	75	29	56	51	54	55	46	64	66	52	39	55	53	50	32	50	58	53	55
78	34	53	51	57	58	58	31	73	25	73	82	70	68	36	62	34	51	31	75	22	48	58	39	41	70	52	75	57	42	54	52	54	68	27	36	36	56	48	68	77	59	47	28	82	41	73	45	61	60
45	43	27	41	43	44	45	44	47	32	43	46	49	51	49	51	48	38	34	40	44	35	48	38	44	43	62	52	63	42	50	59	27	49	43	46	46	46	52	45	49	39	43	49	46	27	44	54	44	52
74	36	47	50	64	57	60	32	70	25	71	71	67	67	38	64	36	61	32	75	24	49	59	41	43	73	63	68	55	47	56	55	53	66	29	39	39	55	50	68	68	56	48	30	73	46	66	47	64	53
81	35	46	49	58	56	56	32	71	25	76	73	68	69	38	64	35	54	31	65	24	49	56	41	45	72	63	69	57	45	53	55	57	68	28	39	39	58	47	64	71	63	50	29	74	40	67	46	64	57
52	41	33	46	56	49	51	47	53	29	50	53	54	61	50	52	40	47	36	54	35	36	54	38	46	53	60	58	58	43	53	65	34	53	41	48	45	53	54	62	54	41	45	42	55	32	50	59	50	56
80	35	55	53	56	60	59	31	76	26	75	82	70	70	35	63	35	52	32	77	22	50	60	38	40	72	53	75	58	44	55	51	56	70	27	37	36	58	49	69	80	61	49	29	85	42	75	47	63	60
51	46	36	46	52	46	47	49	58	32	49	61	61	70	62	57	38	42	32	48	40	37	50	36	48	51	64	53	65	46	51	69	35	55	42	48	47	46	53	53	57	41	50	43	57	29	58	57	51	62
76	36	47	50	65	59	59	32	72	26	72	73	68	68	38	66	36	58	32	75	24	50	59	42	43	74	64	68	56	48	56	56	51	67	29	40	40	57	50	68	70	57	49	30	74	46	68	48	63	54
44	40	26	44	40	43	44	43	45	31	46	45	47	50	48	49	46	37	38	39	43	34	47	41	48	45	60	51	61	41	49	62	26	48	42	45	45	45	56	44	47	42	42	50	45	31	46	52	43	50
51	44	34	46	45	42	46	42	54	31	49	52	53	55	47	57	39	38	30	45	34	40	52	35	49	47	62	48	66	45	52	60	34	60	41	44	44	49	56	47	57	48	47	47	53	33	49	54	56	54
41	46	19	39	39	37	43	47	40	42	45	43	46	40	50	41	52	46	37	43	42	47	44	45	57	47	53	41	55	44	44	57	22	41	47	48	55	36	67	42	44	40	45	53	41	43	45	48	40	44
58	49	36	46	41	48	40	48	58	45	55	60	64	56	47	52	41	37	27	48	49	39	42	36	45	52	63	55	76	35	42	60	42	55	49	38	46	45	58	47	59	44	40	43	59	28	56	59	52	51
50	48	30	44	48	42	49	49	52	36	48	51	54	57	54	57	46	42	32	45	48	40	54	36	50	47	68	47	69	47	56	65	30	55	44	51	51	45	58	50	54	43	49	54	51	30	48	55	50	57
40	54	20	43	41	37	40	48	41	45	38	41	46	40	50	41	49	37	36	41	44	47	44	39	56	37	55	40	58	45	46	53	21	43	55	60	51	44	52	44	40	34	44	48	41	31	37	55	37	45
72	35	49	58	62	55	56	32	76	27	67	76	77	71	39	59	38	52	30	70	25	48	54	39	41	66	56	69	62	43	53	52	47	61	28	38	39	51	53	62	74	55	49	28	79	40	73	46	56	60
45	43	27	41	43	44	44	44	47	32	43	46	49	51	49	50	47	38	34	40	43	35	48	37	44	42	62	52	62	42	50	59	27	49	42	46	46	46	52	45	48	38	43	48	46	27	43	54	44	52
80	35	55	52	57	60	59	31	76	25	75	82	70	71	36	64	34	51	31	76	23	49	60	39	40	71	54	75	58	43	56	51	56	70	27	36	36	57	49	68	79	61	48	29	84	42	76	46	62	60
51	54	30	42	51	57	51	54	53	40	48	59	59	59	57	67	47	48	32	59	45	48	55	43	51	54	62	53	67	51	55	73	31	59	47	48	54	49	66	61	58	40	51	50	56	34	53	57	54	56
67	44	41	48	57	52	61	34	67	30	64	69	64	69	39	71	39	52	36	62	26	53	69	45	50	63	56	62	56	57	61	53	39	76	34	41	44	59	53	62	75	57	59	39	70	41	63	47	67	61
74	36	46	50	64	57	58	32	70	25	71	73	68	67	39	64	36	57	32	73	24	49	58	42	45	73	63	68	55	47	55	57	50	66	29	39	39	55	50	67	68	56	48	30	73	45	66	47	62	55
81	36	47	49	60	56	56	33	71	25	77	72	67	70	37	65	36	56	32	66	24	50	56	40	43	73	63	68	58	45	53	52	57	69	29	39	40	58	48	65	72	64	50	30	75	40	67	47	65	56
77	35	46	48	55	54	56	30	67	25	73	71	66	66	36	61	35	57	31	65	22	47	55	40	44	70	60	69	55	44	52	52	59	66	27	38	37	56	45	64	69	61	48	29	72	40	64	45	65	57
72	35	44	56	61	56	57	31	68	25	77	70	65	66	37	63	34	54	36	71	23	46	56	46	47	79	61	65	53	46	53	58	49	64	28	38	37	54	54	65	66	62	45	34	71	52	72	46	60	52
55	42	34	51	54	49	51	41	56	31	60	62	64	69	53	57	40	50	39	52	33	42	51	45	52	62	53	57	56	46	58	64	35	55	32	52	48	47	57	58	60	46	50	43	58	36	65	46	51	69
65	37	43	49	62	58	61	34	66	25	62	72	66	75	43	68	38	52	41	61	27	48	64	42	44	59	53	68	57	50	61	58	45	66	31	43	41	58	45	69	68	52	57	33	70	36	65	48	61	65
51	44	35	47	44	42	46	41	54	31	49	52	53	54	47	56	40	38	29	46	34	40	52	34	49	48	62	48	66	45	51	60	34	61	42	44	43	50	56	47	58	48	47	47	54	33	48	55	57	54
58	44	37	45	67	57	70	40	58	28	56	65	58	70	46	76	35	61	45	73	29	48	79	44	41	58	45	60	46	63	71	58	38	64	34	50	42	55	48	84	60	48	63	38	65	42	58	45	61	64
54	40	37	50	54	46	50	49	59	29	52	64	63	68	55	55	36	47	30	55	38	36	51	34	43	54	61	57	66	45	53	68	36	53	37	47	43	46	56	57	58	42	46	42	60	32	58	55	51	61
80	35	46	48	58	55	55	31	70	25	76	73	68	69	38	63	35	54	31	65	23	48	55	41	45	71	62	69	57	44	52	54	56	67	28	39	39	57	47	63	71	62	49	29	73	39	66	46	63	58
38	57	17	31	47	40	41	66	37	43	37	39	42	47	58	44	46	48	39	38	56	41	44	45	42	41	57	36	51	46	46	57	21	35	51	53	53	30	54	44	37	30	45	57	37	28	37	46	38	47
60	43	38	47	58	46	53	50	59	31	57	57	59	65	53	56	42	52	35	51	41	42	54	37	47	52	66	53	68	48	55	68	38	54	40	52	49	47	55	59	60	44	54	45	57	31	54	54	51	60
49	50	28	39	59	43	53	50	48	38	47	47	48	55	52	49	53	59	39	47	43	48	56	37	54	47	63	46	54	53	57	58	28	47	43	63	57	42	52	56	49	40	54	47	47	36	45	49	44	58
65	37	40	46	59	61	55	33	65	26	62	66	61	64	37	64	40	48	35	66	24	51	56	47	44	64	54	71	55	46	53	54	42	69	32	40	41	67	48	65	66	50	50	30	66	37	61	53	60	55
41	40	31	59	39	39	36	37	50	33	44	48	54	47	44	45	34	29	25	44	36	31	38	33	53	48	56	46	57	34	40	62	28	55	36	36	40	46	51	41	46	42	35	42	48	36	50	52	48	44
49	47	27	41	58	43	49	56	50	34	45	49	51	56	57	49	48	54	36	47	40	44	51	39	53	48	66	47	54	49	52	59	28	47	39	58	51	40	50	54	47	39	51	43	47	32	45	47	44	60
43	49	26	40	54	51	49	49	48	32	41	48	49	56	54	57	46	44	40	48	40	40	56	44	44	43	56	53	58	50	56	69	24	47	45	49	46	45	55	54	47	35	49	47	46	31	44	54	43	52
44	50	27	40	55	54	50	50	48	32	42	48	50	56	55	58	48	45	43	48	40	40	56	43	44	43	56	49	58	51	57	70	24	48	44	50	46	43	56	55	48	36	50	48	47	31	45	53	44	52
46	49	31	44	56	49	51	48	51	31	45	55	54	63	54	63	39	46	33	55	38	40	58	37	44	50	55	48	61	51	56	74	30	56	42	49	44	46	56	61	52	38	51	48	53	33	50	53	52	54
66	38	47	52	69	58	70	37	68	25	63	74	68	80	44	66	35	59	37	71	27	46	68	42	40	65	55	67	58	53	65	57	45	62	30	45	40	54	51	79	72	50	56	35	71	38	68	46	58	64
44	47	24	37	50	43	53	49	44	37	42	42	45	49	52	43	46	50	35	42	48	40	49	33	47	42	61	41	58	46	51	56	25	42	49	55	50	37	53	50	43	36	46	46	42	31	40	50	39	51
45	48	25	38	51	39	48	50	44	38	43	44	47	50	55	44	47	51	35	43	50	41	50	34	50	43	63	43	61	47	52	60	25	42	50	57	52	38	54	51	44	36	47	47	43	32	41	51	39	54
60	42	38	47	51	46	51	42	60	31	58	57	60	59	48	51	40	51	27	54	35	40	50	33	46	57	76	55	72	38	50	62	45	52	39	40	42	45	58	55	61	48	43	38	58	35	55	53	52	52
64	37	41	50	70	59	61	35	65	26	60	70	67	70	38	62	35	54	31	74	25	50	58	41	40	65	56	63	53	47	54	53	40	61	27	40	38	52	56	67	68	47	46	31	69	42	65	45	54	53
50	43	35	56	58	40	49	45	58	32	48	54	61	58	52	46	40	46	33	49	40	37	52	33	46	44	60	51	67	45	57	65	31	47	42	56	48	42	54	54	51	42	47	42	54	36	51	59	44	57
58	44	36	45	68	58	70	41	58	27	55	69	61	71	48	74	35	61	44	72	30	48	77	47	42	59	46	63	47	61	70	60	37	63	34	49	42	53	49	84	60	46	62	38	64	42	59	44	59	66
55	40	31	42	52	44	53	34	52	27	53	53	49	60	41	56	34	54	38	50	26	46	59	43	44	58	51	49	43	69	53	49	35	62	32	43	39	48	41	54	56	57	60	36	55	44	48	38	61	58
42	46	19	36	45	45	49	41	46	35	40	44	44	48	50	58	46	44	46	47	33	60	56	52	51	41	42	43	41	65	55	42	19	49	43	52	53	50	42	49	47	36	63	41	43	36	41	41	45	49
19	25	17	16	21	20	23	21	20	14	18	18	18	21	18	26	17	25	25	21	13	24	25	24	20	18	17	18	14	28	23	19	22	25	22	20	21	24	14	25	18	19	29	22	20	21	16	18	33	21
38	46	21	39	44	41	47	34	42	32	39	43	40	45	41	55	40	43	47	47	27	57	57	48	53	41	36	39	34	67	51	43	18	55	40	47	45	51	39	50	44	43	60	45	42	45	40	36	52	43
20	30	18	22	24	22	24	29	24	23	20	21	24	25	32	29	25	28	29	23	24	23	31	25	25	19	21	22	19	28	34	25	20	25	31	30	32	26	20	29	20	18	31	26	22	19	19	24	26	36
71	31	58	66	57	51	52	26	75	24	68	76	68	62	31	55	32	46	31	71	19	48	55	35	39	59	45	67	52	44	49	46	48	70	25	35	33	61	45	58	73	67	46	26	81	55	67	45	63	52
31	46	9	28	41	33	38	54	30	41	36	31	33	38	37	39	36	47	56	32	44	42	41	50	41	37	29	30	27	49	40	39	12	29	38	41	46	27	41	41	31	29	46	53	29	32	37	27	28	39
47	40	30	46	55	56	51	31	54	28	46	52	51	52	42	56	45	48	44	59	25	51	57	46	45	46	45	52	40	52	55	46	31	53	36	46	44	53	40	59	49	40	50	32	54	44	48	45	48	48
57	34	34	43	47	50	50	28	53	28	55	56	51	47	30	48	38	45	38	55	23	50	57	41	39	51	42	58	41	42	51	39	34	54	34	37	36	63	43	52	56	50	44	29	58	41	50	51	49	47
46	37	29	52	43	40	45	28	48	29	51	49	43	42	34	46	38	41	45	52	22	57	50	47	58	51	37	45	35	57	45	44	24	54	31	42	40	51	43	46	49	55	50	38	51	61	51	36	46	41
41	51	20	36	49	41	48	50	42	38	39	43	48	53	55	50	49	50	46	42	42	54	54	51	48	41	43	45	41	64	58	46	20	44	44	57	58	47	43	51	47	33	72	45	42	32	40	43	41	60
55	33	27	36	44	47	47	29	46	28	53	50	46	43	30	48	39	60	41	57	23	44	52	44	33	48	40	54	35	39	47	35	38	44	32	33	37	50	37	54	47	43	40	28	52	49	45	40	44	38
33	52	13	26	39	33	42	58	35	47	32	34	35	40	49	48	44	43	48	36	48	47	50	43	47	32	37	32	34	57	52	41	14	38	54	51	58	34	39	45	35	25	55	61	34	28	31	38	34	44
43	49	19	31	46	39	45	48	41	40	41	40	41	46	42	53	38	53	49	44	39	50	55	48	40	40	37	39	33	57	49	41	22	42	44	42	48	36	36	50	41	33	58	49	41	36	37	36	43	44
42	50	21	37	65	51	56	52	49	32	40	47	48	58	58	58	47	56	43	51	37	65	57	51	50	47	50	44	43	67	58	51	21	46	38	57	54	41	46	59	50	33	67	42	43	32	44	37	41	52
81	38	47	53	55	53	56	34	71	26	78	72	68	71	38	65	33	56	38	65	25	45	62	41	40	68	56	66	54	51	55	53	58	69	31	41	37	57	46	66	71	67	55	32	80	43	66	47	72	62
41	50	18	40	44	41	47	45	41	40	45	42	45	46	48	49	51	49	46	41	40	51	49	51	66	51	47	41	41	55	52	54	21	43	42	54	61	43	53	49	43	40	53	51	39	40	44	41	44	49
55	41	36	44	52	47	52	37	56	26	53	57	54	65	45	60	31	44	38	48	27	44	58	42	40	54	47	51	48	54	53	51	39	65	32	41	36	50	43	54	61	52	61	36	57	33	52	43	64	70
54	38	31	54	63	56	60	34	60	28	59	56	57	54	39	57	42	52	41	65	26	51	60	52	46	59	50	59	48	45	58	50	30	51	33	42	42	51	58	65	57	50	46	34	55	47	61	42	45	49
48	49	29	44	56	49	55	48	48	37	46	49	52	54	58	55	42	48	35	55	47	40	55	36	41	48	56	47	63	47	57	63	31	47	51	55	47	41	60	61	48	36	47	50	50	33	45	53	45	53
74	33	46	47	47	55	50	30	67	27	70	66	60	56	31	55	36	45	36	62	22	48	50	44	38	58	45	68	51	40	46	41	49	60	31	35	34	64	43	55	71	55	46	28	70	37	59	51	56	50
73	37	42	49	50	48	47	30	65	30	70	67	63	57	33	52	33	46	31	59	25	48	54	38	39	63	49	63	48	45	48	43	45	60	28	34	36	48	47	48	66	65	46	33	70	45	62	42	57	50
68	43	41	50	59	57	64	39	67	30	65	68	63	69	40	74	35	52	44	68	29	49	70	45	44	63	51	64	51	55	63	55	47	78	34	46	43	64	46	75	68	57	59	39	73	38	62	52	72	64
33	42	12	30	39	39	40	38	34	33	37	30	30	36	33	39	43	44	91	35	34	39	48	55	41	33	27	34	25	50	44	38	15	31	42	43	40	35	33	43	30	36	48	48	33	39	33	33	32	37
52	40	36	48	40	57	43	40	54	31	49	56	60	55	42	51	44	35	30	47	32	37	41	35	45	51	61	58	68	37	40	61	37	61	36	37	40	53	52	46	59	46	40	38	57	31	52	56	55	51
68	31	46	54	46	53	49	26	66	24	71	64	57	58	31	55	35	43	37	61	19	46	51	45	43	63	46	66	53	42	47	47	46	65	28	34	33	67	46	54	72	62	46	30	69	44	63	48	57	51
58	41	39	54	42	46	45	32	60	34	61	55	56	52	40	49	46	40	33	52	28	39	46	41	53	54	51	58	63	38	48	54	39	56	38	47	43	58	54	49	61	53	41	38	59	38	55	56	50	53
59	42	40	54	43	47	45	33	62	35	62	56	58	53	39	50	46	40	34	53	29	40	47	41	54	55	54	59	61	39	47	55	40	58	39	44	44	59	53	50	62	54	42	37	60	38	56	55	51	53
70	40	48	53	59	59	55	34	74	28	66	81	73	75	42	67	38	48	31	64	25	53	57	47	50	64	57	71	61	53	53	59	43	74	29	39	41	59	49	61	79	54	56	32	77	40	72	50	64	61
69	40	47	52	58	58	54	33	73	28	65	81	74	74	42	67	37	48	31	64	25	52	57	47	50	64	57	72	60	52	52	59	43	73	29	38	41	59	48	60	78	53	55	32	76	40	71	49	63	61
69	40	47	52	58	58	54	33	73	28	65	81	74	74	42	67	37	48	31	64	25	52	57	47	50	64	57	72	60	52	52	59	43	73	29	38	41	59	48	60	78	53	55	32	76	40	71	49	63	61
74	36	53	60	59	56	53	32	84	27	71	86	84	70	41	62	34	47	31	69	25	45	55	42	41	64	53	76	58	43	53	53	50	65	30	38	38	54	48	62	71	58	47	28	84	41	76	49	59	62
54	40	29	45	55	44	55	36	50	27	58	51	48	61	44	56	37	58	46	50	28	48	61	49	51	62	52	48	45	71	56	56	33	56	32	44	42	44	47	56	56	59	64	43	53	47	53	38	56	59
42	45	25	43	50	50	48	48	46	31	44	46	47	54	53	55	45	43	44	46	39	38	54	48	47	46	54	51	56	49	55	72	23	46	44	48	44	44	59	53	46	38	48	49	44	35	47	52	42	50
60	42	37	50	50	45	52	43	60	31	58	57	62	60	52	51	40	50	28	51	37	38	50	35	47	57	72	55	76	41	53	63	43	51	40	46	44	44	60	54	62	48	44	40	55	33	52	53	53	58
48	35	35	49	38	49	36	38	52	27	49	55	56	56	46	48	41	32	28	44	29	35	38	39	46	51	56	58	63	34	39	58	34	54	34	37	39	51	54	42	53	45	36	37	53	31	56	56	49	50
74	35	48	50	58	57	57	30	71	26	70	73	68	67	37	59	39	52	37	64	24	50	58	44	45	62	55	71	58	45	53	51	47	65	31	39	39	62	48	62	74	54	51	30	71	40	65	50	57	57
73	37	45	54	49	52	47	32	72	28	70	70	72	65	39	58	35	46	30	58	26	41	50	37	40	65	57	61	56	39	52	50	56	62	30	38	37	52	45	55	65	63	44	29	71	38	66	49	63	61
73	36	52	60	58	55	52	32	83	27	69	84	82	69	41	62	34	46	31	68	25	44	54	41	41	63	53	75	57	43	52	52	49	64	29	38	38	53	48	61	70	58	46	28	83	41	76	48	58	63
74	36	52	60	59	56	53	32	84	27	70	85	83	70	40	61	34	47	31	69	25	44	55	42	42	64	53	76	58	43	53	53	50	64	30	38	38	54	48	62	70	58	47	28	84	41	76	49	59	62
74	36	52	59	58	55	53	33	82	27	70	85	81	70	42	61	34	47	31	69	25	44	55	41	44	64	53	75	56	43	53	53	49	64	29	38	38	53	48	61	70	58	46	29	83	41	75	48	59	64
75	36	53	59	59	56	53	33	84	27	71	86	81	71	41	62	34	48	31	70	25	45	55	42	43	65	54	76	57	44	53	54	50	65	29	38	38	54	48	62	71	59	47	29	85	41	77	49	60	63
54	41	39	54	56	43	48	46	62	29	51	60	61	66	51	51	35	44	31	53	38	34	52	33	42	50	62	55	69	43	53	66	37	51	39	49	42	43	54	57	55	43	44	42	60	32	58	59	48	57
66	38	42	47	58	53	55	35	66	25	62	62	60	69	39	59	38	53	40	56	27	48	58	46	42	56	52	65	56	50	56	54	42	60	34	43	40	63	44	63	67	50	56	32	63	35	58	51	56	58
65	37	36	43	62	54	61	32	58	28	62	62	58	62	39	59	41	73	35	67	26	58	61	41	47	64	61	58	50	50	57	50	45	58	31	43	43	52	50	68	62	49	52	32	61	49	57	42	55	48
67	36	36	42	60	48	61	31	58	27	64	60	56	58	38	53	41	72	34	60	25	56	60	41	48	63	64	57	51	49	56	46	43	55	31	43	43	48	49	61	63	54	50	31	58	48	54	38	54	50
70	39	49	49	65	53	62	35	71	25	66	70	65	78	45	68	32	55	39	65	27	44	66	40	43	60	52	68	55	53	63	60	51	67	31	46	39	56	45	73	69	54	58	33	72	37	64	47	62	67
61	42	40	51	78	60	72	39	65	27	58	67	63	72	46	74	38	62	42	81	29	53	80	46	41	60	50	62	50	62	73	58	38	63	34	49	44	54	53	90	64	47	60	37	69	45	61	45	57	58
50	36	25	37	55	44	47	42	45	25	46	45	47	50	42	47	35	62	40	46	31	40	51	46	32	43	45	48	40	46	50	42	31	38	34	41	38	40	39	52	41	37	46	32	44	37	42	38	40	48
49	41	32	45	56	48	50	47	52	29	47	54	56	58	52	54	39	45	36	53	39	36	55	41	40	47	57	55	57	46	56	65	32	49	43	48	43	49	52	60	48	40	48	41	54	32	50	56	48	56
62	38	34	45	51	60	52	33	56	28	58	63	59	59	36	66	35	48	37	64	24	48	58	47	40	61	48	64	47	46	52	49	45	71	33	37	37	62	46	62	62	55	50	32	66	41	57	50	75	54
63	39	34	43	59	52	62	34	56	29	60	61	57	60	37	59	40	72	36	68	26	53	62	42	44	62	56	57	47	50	56	47	44	58	32	41	42	52	48	69	62	49	50	33	61	52	56	42	55	47
64	38	46	52	72	50	65	38	68	25	60	70	65	73	46	60	35	62	39	66	28	47	68	44	42	56	52	69	53	59	63	56	40	57	30	45	41	49	48	72	66	51	63	34	67	42	64	43	55	66
64	38	46	52	71	50	65	38	68	25	60	72	66	74	46	61	35	61	39	65	28	46	68	45	42	55	52	69	54	59	63	56	40	58	30	44	41	50	48	71	66	51	63	34	68	42	64	43	55	67
60	36	43	57	67	47	61	36	63	23	62	65	61	69	43	56	33	58	43	61	26	43	63	49	46	59	49	64	50	55	59	60	37	53	28	42	39	46	53	67	61	54	58	38	63	48	68	41	51	62
55	42	35	49	64	54	67	39	56	26	60	62	55	66	44	72	33	58	50	70	28	45	75	49	45	63	44	57	44	60	67	62	36	61	33	48	41	52	52	80	57	53	60	42	62	46	63	43	58	61
64	33	44	49	47	66	45	30	65	25	60	72	66	69	36	59	39	40	34	58	22	48	48	43	40	62	50	71	55	44	45	50	46	70	26	32	36	60	44	53	71	53	46	27	70	36	68	47	61	57
64	37	44	54	48	56	45	31	68	27	67	73	67	66	37	62	33	41	34	59	24	46	48	47	47	67	47	65	54	45	45	57	43	67	26	33	36	54	49	54	71	57	49	34	72	41	75	54	59	56
68	38	39	46	61	48	54	37	62	25	63	59	58	70	43	58	35	56	35	56	29	41	59	35	41	59	59	56	58	50	56	57	48	58	31	44	40	49	45	65	62	53	55	34	62	34	56	49	57	59
62	48	37	46	58	59	57	39	61	30	58	67	62	68	43	74	36	52	40	64	28	50	65	47	44	63	51	61	51	58	60	58	43	72	36	44	41	59	48	70	66	53	64	39	66	41	60	50	75	64
48	57	24	36	47	46	46	45	52	39	45	54	50	54	43	57	42	45	47	47	34	58	53	58	51	48	43	49	42	61	49	45	25	56	42	42	49	51	40	53	55	39	70	46	50	34	49	44	53	52
54	40	30	45	60	47	63	35	51	27	60	52	49	61	41	60	38	74	49	62	28	52	67	45	48	59	49	49	44	59	60	56	38	52	33	47	42	46	50	73	55	50	59	41	54	53	55	37	52	50
54	44	33	46	49	51	48	44	54	37	52	57	60	60	52	52	45	43	24	56	40	42	45	34	43	59	68	53	82	38	48	61	34	54	42	43	45	43	68	53	62	40	40	39	55	31	54	53	49	53
75	31	46	58	59	52	53	32	75	25	71	71	72	66	37	54	33	52	28	67	23	42	53	36	37	68	58	65	57	40	50	46	51	58	25	36	34	49	50	61	70	57	43	26	73	42	66	43	57	54
64	29	41	50	52	54	48	31	64	22	61	62	60	61	35	48	38	53	32	59	22	43	50	40	36	60	57	66	53	37	48	45	48	52	27	33	33	53	44	55	60	50	41	25	63	37	59	47	52	50
50	48	23	35	42	42	43	40	48	38	48	48	44	45	35	51	38	47	44	47	30	55	49	48	44	47	42	44	35	49	44	38	32	54	40	39	42	47	36	47	48	44	53	42	51	38	43	42	54	44
76	34	53	61	57	57	54	32	78	27	73	83	77	66	34	61	34	47	32	77	23	50	58	40	40	66	49	77	54	45	52	50	52	72	27	39	36	59	49	64	75	66	47	28	94	48	75	49	64	57
31	47	11	28	42	37	39	58	31	46	30	32	36	40	55	41	59	47	44	34	58	46	43	37	48	33	49	34	44	48	47	50	12	33	49	62	65	32	49	42	33	25	48	53	30	28	30	42	29	42
62	36	38	52	55	60	55	31	60	25	66	63	58	62	35	60	38	46	41	65	23	47	54	53	49	70	51	69	50	44	51	55	40	67	30	39	37	67	52	63	65	56	45	35	65	44	65	51	59	53
62	33	40	47	59	65	57	31	60	24	59	63	59	60	35	56	42	49	36	72	22	47	58	43	38	62	51	75	53	41	55	48	41	61	29	36	36	60	49	67	66	48	44	27	64	38	59	47	54	51
66	34	40	48	53	62	54	31	63	26	64	66	59	60	35	62	40	47	36	72	22	52	56	46	40	66	49	72	50	44	51	48	44	69	30	39	38	69	48	64	69	54	47	28	71	41	60	51	61	53
63	37	39	45	57	64	54	32	62	26	60	63	60	62	37	61	41	46	38	64	24	49	54	46	43	62	53	70	54	44	52	53	41	66	31	39	40	64	47	63	63	48	48	30	64	36	59	52	58	54
63	38	39	46	62	59	58	35	63	26	60	63	61	67	39	64	39	50	38	63	26	50	59	49	44	62	56	68	53	47	56	55	41	66	33	43	42	64	48	67	63	49	51	33	64	36	60	52	60	57
69	34	41	45	58	57	54	30	62	24	66	64	60	62	36	60	37	55	33	64	23	46	56	44	40	64	57	68	52	42	52	50	51	63	30	37	37	61	45	64	63	52	46	28	64	39	60	50	61	53
66	36	40	46	58	61	55	33	64	26	63	65	61	64	37	63	40	48	35	66	24	51	56	47	44	64	54	71	55	46	53	53	42	69	32	40	41	67	48	65	66	50	49	30	66	37	61	52	60	54
66	36	40	46	58	61	55	33	64	26	63	65	61	64	37	63	40	48	35	66	24	51	56	47	44	64	54	71	55	46	53	53	42	69	32	40	41	67	48	65	66	50	49	30	66	37	61	52	60	54
65	37	40	46	59	61	55	33	65	26	62	66	61	64	37	64	40	48	35	66	24	51	56	47	44	64	54	71	55	46	53	54	42	69	32	40	41	67	48	65	66	50	50	30	66	37	61	53	60	55
65	36	40	46	59	61	55	33	65	26	62	66	62	65	37	63	40	48	35	66	24	52	56	48	44	64	55	71	55	46	53	53	43	69	32	40	41	67	48	65	66	51	49	30	67	37	61	52	60	55
51	42	31	44	55	49	50	48	52	30	49	53	55	59	52	53	41	45	35	53	39	38	52	41	45	51	61	58	61	44	56	66	33	53	41	50	45	52	54	60	52	40	45	43	52	30	48	58	49	59
51	42	31	44	55	49	50	48	52	30	49	53	55	59	52	53	41	45	35	53	39	38	52	41	45	51	61	58	61	44	56	66	33	53	41	50	45	52	54	60	52	40	45	43	52	30	48	58	49	59
61	36	38	49	57	58	53	37	65	26	58	63	62	65	39	60	39	46	34	62	25	48	54	46	44	62	58	67	56	44	52	53	41	64	32	39	40	62	48	62	62	48	47	30	63	35	60	52	58	55
65	36	40	48	60	60	55	33	65	26	62	66	61	64	37	62	39	48	35	66	24	51	58	47	43	63	55	71	54	45	55	52	43	68	32	40	40	66	48	66	65	51	48	30	67	37	61	52	59	55
63	36	39	46	57	61	57	32	62	26	60	66	61	65	37	62	40	48	36	68	23	50	57	49	45	64	53	73	52	47	54	53	41	69	31	39	38	69	49	67	68	50	48	30	67	37	60	53	61	56
62	36	38	45	55	67	61	31	60	25	59	63	58	62	35	60	38	46	35	65	23	47	54	46	41	63	51	69	50	44	51	50	40	67	30	39	37	67	46	63	65	49	45	30	65	37	58	51	59	53
64	37	39	47	57	62	57	32	63	26	61	68	63	64	37	63	39	47	36	68	23	49	57	50	44	65	53	75	52	46	53	53	42	71	31	40	38	70	48	66	67	51	47	31	68	38	60	53	62	57
65	37	40	47	59	63	56	33	64	26	62	66	62	65	37	64	40	49	36	67	24	51	57	48	44	65	55	73	54	46	54	54	43	70	32	40	41	70	49	66	67	51	49	30	67	38	62	54	62	55
50	45	26	45	46	53	46	54	51	38	47	57	61	52	51	60	43	39	28	57	41	45	50	39	48	52	60	52	62	41	49	62	31	55	42	45	50	45	66	54	52	42	42	44	53	33	52	54	51	50
52	47	28	47	47	51	47	55	54	40	50	56	62	50	54	59	43	40	31	58	42	45	51	40	48	50	61	52	62	40	51	61	33	54	45	48	50	46	67	55	50	42	42	47	54	34	51	57	50	52
54	40	29	39	57	66	64	39	52	27	52	52	50	58	39	63	36	51	47	62	29	45	61	48	36	52	40	57	41	51	56	50	35	54	35	44	39	56	44	69	52	42	52	35	55	35	47	47	53	51
47	43	24	41	48	46	45	47	44	33	45	43	47	48	47	48	37	43	37	49	41	34	50	38	41	44	52	49	51	39	49	60	31	43	43	45	41	45	52	55	42	38	40	43	44	31	40	55	44	48
56	41	31	41	59	59	58	40	54	28	54	56	53	60	42	66	38	53	49	65	29	46	63	52	39	53	41	62	42	53	58	53	36	56	36	45	40	58	45	71	54	44	54	37	57	36	49	49	55	56
56	41	31	41	60	60	59	40	54	28	54	57	54	60	42	66	38	54	49	65	30	47	63	53	38	54	41	62	42	53	58	52	36	57	36	46	40	58	45	72	54	44	54	37	57	36	49	49	56	55
46	46	26	41	48	50	47	49	47	34	44	46	49	51	52	53	41	43	41	52	41	37	51	43	45	44	52	51	53	43	50	63	31	48	46	48	43	49	52	57	45	38	44	47	47	31	41	58	47	51
57	42	31	41	60	61	60	41	55	28	55	55	52	61	41	68	38	54	50	66	30	47	64	51	37	54	42	61	42	54	59	52	37	58	36	46	41	59	46	73	55	45	55	37	58	37	50	50	57	54
53	37	34	48	53	48	50	39	57	26	57	57	55	62	44	54	36	47	44	50	30	47	55	53	46	57	48	60	46	53	52	57	33	55	33	42	41	61	48	54	56	51	56	39	56	39	61	52	52	63
69	42	40	47	42	49	47	43	61	37	66	58	62	53	42	51	38	43	29	53	36	38	45	33	42	56	63	56	64	35	44	54	52	55	42	41	42	46	57	50	57	55	39	40	65	34	55	58	55	50
60	44	38	47	65	62	59	45	63	29	57	72	68	78	47	78	37	51	39	65	31	52	66	50	44	64	52	66	52	60	61	64	38	71	32	44	46	59	50	72	66	49	64	39	67	37	67	50	67	66
54	45	29	38	59	46	59	40	51	30	52	54	50	59	44	63	38	74	47	56	32	51	72	45	42	49	47	49	40	62	63	51	34	50	38	48	46	46	42	65	52	44	63	39	52	49	49	40	53	53
64	31	42	54	53	56	48	29	64	24	60	76	71	61	33	54	33	41	30	66	21	44	51	43	37	59	44	78	49	40	47	47	41	61	28	33	33	67	45	58	65	52	42	26	74	40	66	55	55	52
73	40	50	55	56	57	57	37	78	31	69	72	75	67	43	63	41	50	31	69	28	48	56	40	46	64	59	70	61	44	58	53	51	66	32	44	44	56	52	66	72	55	48	32	75	37	67	50	59	62
43	58	18	31	59	41	53	52	44	37	40	41	39	48	42	54	40	57	60	47	38	54	60	53	42	39	37	39	31	63	54	41	20	42	44	56	47	40	35	61	40	34	63	47	42	33	38	38	40	46
41	49	21	35	60	43	59	43	45	34	39	45	43	60	53	60	45	55	49	51	35	64	66	52	52	42	43	43	40	96	59	49	19	50	39	55	54	44	42	59	50	36	79	45	45	38	42	37	45	52
48	56	26	41	60	52	55	53	48	42	45	52	58	64	61	65	52	52	36	56	45	49	58	41	52	52	58	50	59	55	63	67	28	54	44	58	59	45	59	64	53	38	59	45	50	32	49	47	51	63
57	42	31	45	68	63	67	48	55	31	54	61	61	71	46	72	41	64	39	71	35	55	68	43	40	65	48	60	54	59	62	58	33	62	31	47	46	50	62	79	69	43	60	37	59	40	56	41	56	60
60	32	32	42	43	38	50	26	50	28	65	47	43	42	29	43	37	63	46	54	22	47	52	41	41	58	45	44	39	41	46	37	40	44	29	34	36	38	47	50	54	60	42	35	51	64	51	32	45	40
53	40	31	43	58	59	57	37	53	27	51	54	52	61	38	66	37	51	49	64	27	46	65	48	37	52	40	59	42	54	58	53	37	60	35	44	38	62	44	70	55	48	54	35	58	40	49	50	60	53
38	45	20	37	52	40	46	45	42	32	36	44	47	50	72	49	44	48	42	43	37	49	53	49	45	35	41	43	38	58	62	43	20	38	41	60	52	42	40	52	40	30	59	40	41	31	39	39	36	65
57	40	33	46	56	50	53	46	55	32	54	55	57	53	52	55	42	54	27	64	35	42	54	35	43	56	70	52	64	39	56	59	39	48	38	44	45	42	64	63	54	42	40	39	53	38	51	50	48	48
59	41	33	45	55	51	54	48	56	33	56	57	59	55	51	57	43	57	28	64	36	44	53	36	44	57	71	53	64	40	52	61	41	50	38	44	46	43	65	62	56	44	41	39	55	40	53	50	50	48
52	42	34	49	48	44	46	44	53	35	50	57	60	62	51	56	37	43	30	48	44	35	50	33	43	50	61	53	72	43	51	66	35	55	42	49	43	47	54	54	56	42	46	44	56	30	54	58	51	59
59	27	40	52	46	43	47	22	55	21	57	56	51	49	25	44	32	43	33	52	17	41	53	34	35	51	42	57	42	36	47	37	40	55	27	32	30	65	40	50	57	65	40	23	60	47	51	46	52	45
39	40	16	30	45	39	60	38	38	30	37	37	34	44	42	48	40	60	55	43	31	49	58	41	41	35	35	33	31	65	52	37	21	38	37	48	47	38	33	52	39	36	64	40	39	43	33	31	43	45
33	59	11	29	36	40	34	47	34	51	30	35	40	34	46	38	57	34	41	34	44	41	34	52	53	32	40	42	40	38	39	41	13	33	52	50	55	37	47	36	32	23	38	44	31	24	31	50	29	38
75	35	44	48	48	49	48	30	67	30	72	69	62	57	33	53	36	48	33	60	25	50	55	40	42	66	51	63	49	47	48	44	47	63	29	35	38	50	46	50	69	68	48	32	73	47	62	43	61	53
54	44	31	43	56	42	51	48	54	30	51	52	56	60	54	53	37	57	36	48	36	42	57	40	45	52	67	49	51	51	58	57	36	49	38	50	46	42	48	56	51	45	51	41	51	37	50	45	50	57
50	51	26	39	68	47	58	48	51	32	47	52	49	60	50	59	45	62	51	52	36	63	65	49	53	48	50	49	42	67	62	54	26	52	39	61	54	49	42	66	50	39	69	43	50	37	48	41	47	55
38	52	17	29	51	44	57	44	41	33	36	38	35	43	40	49	36	50	59	43	34	48	57	47	38	35	34	35	28	57	51	38	19	39	42	51	42	38	31	55	36	32	57	45	39	32	34	36	38	42
53	48	32	45	61	50	61	48	53	39	50	56	57	53	53	55	48	53	31	65	39	50	64	40	51	51	64	54	63	45	63	60	31	50	45	50	53	44	71	67	56	43	45	43	54	40	50	51	44	52
53	44	28	40	64	78	73	42	52	29	50	60	55	65	41	74	39	55	37	66	30	53	63	45	41	64	47	57	49	55	58	55	33	63	31	43	44	51	53	74	63	44	55	38	57	36	55	43	59	54
39	57	18	34	55	43	51	58	41	38	36	43	46	53	61	54	48	50	43	42	46	56	56	47	57	38	51	41	48	64	56	60	18	43	47	58	58	40	50	54	44	31	67	53	38	30	38	44	38	53
60	31	57	50	48	47	47	25	70	19	58	65	63	62	33	56	26	38	26	56	18	35	50	33	35	51	46	59	48	37	48	46	58	59	25	32	30	49	36	55	59	51	41	23	67	31	61	43	57	53
61	38	36	49	54	50	58	29	58	27	68	59	54	59	37	57	37	64	41	65	23	52	59	44	51	66	53	54	47	49	52	53	45	58	30	39	37	52	50	66	62	55	50	35	61	56	62	42	55	48
70	36	46	53	53	51	57	28	65	24	67	65	60	64	34	69	31	53	34	66	21	44	63	38	40	68	56	59	52	47	56	50	53	76	30	38	35	64	45	66	68	66	51	29	70	48	59	46	75	54
52	43	35	44	54	56	53	36	56	27	49	61	58	64	45	81	34	46	35	60	26	49	62	45	42	53	48	53	48	55	58	56	35	70	33	40	43	58	46	65	59	47	57	35	58	38	55	44	67	57
77	37	52	53	54	62	59	32	73	27	73	76	67	64	34	64	35	50	34	79	22	52	61	39	41	69	50	75	55	44	55	49	57	74	29	37	37	60	48	70	77	65	50	30	83	42	69	49	67	57
80	36	55	50	54	59	55	33	76	27	75	79	68	67	36	62	33	48	33	71	23	48	55	41	38	67	51	73	55	41	52	48	59	66	28	36	35	55	46	65	74	61	47	30	80	38	72	47	61	58
57	41	36	52	50	47	48	43	59	34	53	59	64	61	49	49	42	44	24	52	38	40	45	32	44	55	70	54	82	36	48	59	35	50	40	44	42	43	63	50	63	43	41	37	57	31	57	51	46	56
50	45	31	48	57	51	55	47	53	34	48	54	56	54	56	55	44	47	29	64	38	42	57	36	48	52	67	52	65	41	60	62	32	51	42	48	49	44	64	66	53	39	41	43	52	35	50	53	46	50
59	41	33	45	55	51	54	48	56	33	56	56	58	54	50	56	43	56	28	64	36	44	53	35	44	57	70	53	65	40	52	61	40	49	38	45	46	43	65	62	55	44	41	39	55	39	53	50	49	48
53	42	32	46	57	55	56	49	54	33	49	57	57	55	51	55	45	51	28	66	37	45	54	35	45	59	66	53	66	40	55	61	32	50	39	46	46	43	69	63	56	40	42	41	53	36	53	51	46	51
50	45	31	47	64	51	61	52	53	33	48	54	56	58	56	60	43	52	33	64	40	42	63	37	46	52	65	52	63	45	65	66	31	51	41	52	50	44	64	73	53	38	45	46	52	35	50	52	47	53
51	44	33	46	61	54	57	49	54	32	47	55	57	57	53	56	43	49	29	64	37	44	55	37	45	55	66	52	64	42	57	65	32	49	41	47	46	43	66	63	53	38	43	43	52	34	52	54	45	51
54	46	33	45	54	62	56	40	56	31	52	62	59	63	44	76	38	51	39	68	29	54	66	46	44	60	45	58	49	58	58	56	36	73	35	42	43	59	51	69	65	50	61	39	62	40	55	45	69	59
59	41	34	45	55	51	54	47	58	32	57	56	58	54	51	57	43	56	28	66	35	44	54	35	45	57	71	53	64	40	54	61	41	51	39	44	46	44	64	63	55	44	42	39	56	40	52	51	50	47
50	40	31	46	52	53	52	44	53	32	48	55	54	50	49	52	45	45	30	64	34	41	53	40	43	52	61	57	62	38	55	58	31	48	41	43	44	50	63	62	52	38	39	39	52	35	50	58	44	48
62	42	43	50	60	57	53	36	69	28	58	74	69	73	44	70	37	47	34	64	28	51	59	48	46	64	53	68	57	60	55	63	39	73	31	39	43	60	47	63	70	49	64	34	71	39	68	52	68	64
52	43	31	48	46	47	47	50	57	37	50	58	62	58	53	56	42	43	31	45	43	43	49	39	45	51	59	50	61	42	55	56	33	52	39	50	50	44	56	48	58	44	47	43	54	29	53	50	48	62
50	33	40	53	49	39	47	35	58	23	47	53	54	56	45	47	31	40	31	46	27	37	51	33	39	43	50	49	51	47	51	51	33	52	32	41	37	46	43	47	52	49	46	32	56	38	50	48	50	54
64	37	50	54	69	53	62	37	71	24	61	72	66	80	43	61	34	58	38	70	27	45	66	41	40	62	52	70	56	59	61	58	46	63	29	43	39	53	47	74	69	52	60	33	74	41	68	46	61	67
66	36	51	54	69	52	62	36	72	24	62	73	67	80	44	63	33	57	38	70	27	45	67	41	40	60	52	70	56	58	62	59	47	64	30	43	39	53	46	73	69	53	61	33	74	41	68	46	61	66
64	38	50	53	71	50	64	37	72	25	61	70	63	76	45	60	34	59	39	66	28	47	70	42	41	57	53	67	55	60	64	56	43	60	30	44	40	50	47	70	67	54	63	34	70	43	65	44	57	68
65	39	51	54	71	50	65	37	73	25	62	68	63	75	45	60	34	59	40	67	28	47	71	42	41	56	53	67	55	61	65	56	44	61	31	44	41	51	47	71	68	55	64	33	71	43	64	45	58	67
64	38	50	55	72	49	64	37	72	25	61	67	62	73	44	59	34	58	39	66	27	46	72	41	41	55	52	66	54	60	66	55	43	60	30	44	40	50	46	73	67	54	62	33	71	43	62	44	58	66
49	46	29	46	42	44	41	48	51	43	47	54	56	55	52	46	46	37	27	45	45	46	41	37	50	50	60	49	73	41	43	57	29	49	44	49	47	44	58	44	56	38	46	44	50	27	51	53	43	50
56	38	38	50	37	41	38	35	52	35	54	54	57	50	42	48	37	42	24	47	36	35	41	29	42	51	62	51	69	33	42	55	46	55	39	41	38	48	50	44	53	50	38	35	54	36	50	52	56	48
55	38	29	46	60	48	64	34	51	26	60	53	50	57	39	61	37	69	44	61	26	50	63	47	45	60	50	49	44	52	58	52	37	49	29	44	43	44	52	71	52	48	52	40	52	54	62	36	49	47
60	38	35	44	54	49	48	31	56	26	57	58	55	60	39	55	36	47	32	52	26	38	54	39	40	57	56	59	52	43	51	53	40	57	34	40	37	61	44	58	56	47	48	32	58	35	54	60	56	55
45	46	31	50	51	42	44	46	53	32	49	51	54	59	57	52	38	39	35	49	38	36	49	37	56	52	59	49	58	46	50	72	29	55	41	46	46	47	55	51	50	42	47	51	53	35	53	56	50	54
48	46	34	53	48	46	41	43	56	34	52	58	59	58	53	52	40	35	30	51	35	39	45	40	59	57	65	54	62	41	46	70	31	58	40	41	45	49	60	48	54	45	42	49	56	37	60	59	51	51
61	35	33	49	50	41	52	38	54	26	65	52	54	57	43	53	33	58	46	50	29	43	57	44	47	62	52	50	47	52	54	54	38	51	29	44	39	43	51	55	57	57	57	39	55	46	55	39	51	62
62	35	33	51	52	43	54	40	56	26	67	53	56	59	43	55	33	60	46	52	30	44	59	44	44	63	55	50	50	52	55	53	38	52	30	44	40	44	54	56	59	58	58	39	56	46	57	40	52	60
62	36	33	50	53	44	57	39	54	27	66	53	56	60	43	53	35	63	46	51	31	44	60	44	45	65	56	51	49	53	57	54	37	51	30	45	41	43	56	57	60	59	56	40	56	47	58	38	51	61
60	47	39	50	55	54	53	45	63	34	57	67	67	76	56	66	44	50	35	57	36	45	58	40	49	59	56	60	63	56	62	64	40	66	36	51	52	53	51	64	71	49	61	39	66	33	62	50	62	76
56	50	36	49	51	50	50	46	58	38	53	61	63	71	58	60	47	48	33	53	39	42	55	37	52	56	57	56	68	53	60	65	38	62	39	58	54	50	55	60	66	46	56	43	62	31	57	52	58	73
57	51	36	49	51	50	51	47	59	38	54	62	66	72	57	61	47	49	34	54	39	43	55	38	53	56	60	57	67	53	58	67	39	63	39	55	55	51	54	60	67	46	57	43	63	32	58	52	59	73
59	46	38	49	53	52	53	44	62	34	56	67	69	75	56	64	43	50	35	57	36	45	58	41	50	59	55	62	62	56	61	64	40	66	35	51	51	53	51	63	70	48	60	39	65	33	60	49	61	77
60	46	38	49	56	53	53	44	63	34	57	65	68	76	55	65	44	51	35	56	37	47	58	40	50	58	57	61	64	56	62	65	41	66	36	51	53	53	52	63	70	48	62	39	65	33	61	49	61	75
59	46	38	49	55	51	52	43	61	33	56	66	69	76	57	64	43	50	35	56	36	45	58	40	50	58	56	61	62	55	61	64	40	65	36	51	51	52	51	62	69	48	60	39	64	32	60	49	60	76
57	45	36	48	52	50	51	42	59	33	54	62	64	72	53	61	42	48	34	54	35	45	56	38	47	57	53	57	60	54	59	60	39	63	35	50	50	51	49	61	67	47	57	38	63	32	58	53	59	72
65	41	41	50	57	48	56	39	63	30	62	61	63	72	51	56	39	60	35	60	32	40	58	35	44	61	59	59	59	49	61	57	50	58	33	50	45	49	49	66	66	52	52	35	64	38	57	45	59	68
65	41	41	50	57	48	56	39	63	30	62	61	63	69	49	56	40	62	35	60	32	43	58	35	45	61	59	59	60	49	61	58	50	58	33	49	46	49	49	66	66	52	54	35	64	38	57	45	59	68
59	47	38	49	53	52	52	44	62	34	56	67	68	74	56	63	44	50	35	56	36	45	57	41	51	58	55	61	61	56	60	63	40	65	36	51	51	52	50	62	70	48	60	39	65	32	60	49	61	78
55	50	35	48	50	48	49	46	58	37	53	62	64	69	59	59	47	47	33	52	39	42	53	39	53	54	56	57	67	52	59	65	38	61	39	58	54	49	54	58	65	45	56	43	60	30	56	52	56	75
61	35	47	53	53	55	50	28	66	22	58	74	67	71	36	63	33	43	31	58	21	43	53	45	38	57	49	70	52	44	49	53	43	69	31	34	34	75	43	58	65	53	48	28	68	39	67	57	63	55
44	48	20	32	64	50	58	50	45	31	42	50	46	59	53	60	46	61	45	53	34	65	59	53	48	50	49	46	42	67	56	50	21	48	35	54	51	43	47	63	52	34	68	42	43	33	45	35	43	55
45	49	27	42	56	45	57	47	45	38	44	45	47	49	58	50	43	50	36	51	48	39	58	35	42	44	56	43	61	48	60	59	26	42	52	57	48	36	63	56	46	37	46	51	46	35	41	49	40	52
40	46	25	45	50	51	47	51	44	34	44	48	51	57	52	55	42	41	41	49	43	40	50	48	49	52	51	51	55	48	50	70	25	48	45	50	46	46	66	54	47	38	46	53	46	35	51	59	44	53
58	44	33	43	64	63	65	43	59	30	55	66	62	71	46	88	40	56	39	69	31	56	69	50	45	62	52	61	52	61	64	59	35	70	33	45	52	57	54	75	66	44	60	39	63	39	61	45	61	59
54	45	29	44	49	49	47	46	50	35	51	55	57	50	47	52	42	50	27	55	38	40	48	34	42	55	67	50	61	36	49	57	37	47	40	42	45	41	60	54	49	42	36	41	53	36	50	50	48	47
67	27	53	47	43	46	44	22	65	20	64	61	54	55	28	47	30	40	29	56	16	40	45	36	33	54	42	60	48	34	41	39	48	56	25	29	28	59	39	49	67	52	40	22	64	38	55	46	51	47
64	31	49	53	49	57	47	27	66	21	61	78	67	67	34	59	32	41	28	61	19	45	50	42	36	60	47	72	52	40	46	49	45	68	27	31	32	73	43	55	69	55	45	25	72	41	70	54	60	54
73	42	53	58	57	54	56	36	76	33	67	73	75	66	43	60	41	50	30	72	30	44	56	37	46	61	57	73	62	43	59	54	49	63	35	44	46	53	55	64	69	53	47	33	77	41	68	52	56	59
53	45	35	45	51	46	46	48	57	31	51	60	60	68	61	56	38	43	31	47	39	37	49	36	47	53	65	52	64	45	50	66	37	54	41	47	46	45	52	52	56	43	49	43	56	30	57	56	54	61
61	38	36	43	54	57	64	29	57	27	58	59	54	57	35	56	38	65	34	64	23	54	58	37	46	58	54	54	48	48	52	48	44	57	30	39	38	52	44	65	61	48	51	30	60	48	54	42	55	47
50	41	31	49	49	44	45	48	51	33	54	55	59	61	59	51	43	44	34	46	43	37	45	40	50	55	59	51	64	41	53	68	32	48	39	58	49	42	62	51	53	41	44	48	51	31	58	51	45	62
68	37	47	52	60	63	61	32	73	27	65	79	70	76	40	68	38	51	31	76	24	53	60	42	44	73	57	70	62	53	54	55	44	79	29	36	38	62	54	67	84	52	54	33	79	42	71	51	67	60
67	39	45	50	66	57	63	40	67	25	63	75	70	80	46	70	34	58	39	67	29	47	68	43	40	62	52	70	54	57	65	59	45	66	31	46	41	56	47	74	68	51	61	35	73	37	68	48	64	66
62	37	43	55	59	52	60	36	63	25	68	73	68	75	45	66	32	54	43	64	26	43	65	49	46	64	48	68	51	55	60	63	43	64	30	43	38	55	49	70	66	56	58	39	71	42	72	46	62	65
42	49	22	45	41	33	38	49	44	38	44	40	47	47	48	40	37	36	41	34	47	31	42	40	44	39	50	40	52	38	47	56	25	39	47	49	46	35	53	42	39	40	42	52	41	29	45	53	37	52
65	44	43	54	54	49	51	39	67	30	62	68	69	72	47	59	37	48	32	58	29	41	55	39	47	60	59	61	58	47	56	59	45	61	36	45	43	52	48	60	63	52	49	35	68	38	65	50	62	66
66	36	45	50	61	60	59	33	69	26	63	78	69	74	40	66	37	51	29	73	23	50	57	42	45	71	56	69	59	50	51	56	42	75	28	36	37	59	52	65	80	50	52	31	75	41	69	49	63	60
67	36	45	50	61	60	59	31	69	26	63	78	69	74	39	67	38	52	29	73	23	52	57	42	47	71	56	69	61	50	51	57	42	75	28	35	38	59	52	65	80	50	55	31	75	41	69	49	63	60
66	36	45	51	60	61	59	33	70	26	64	79	70	73	40	67	37	51	30	74	23	51	58	43	46	72	56	70	60	51	52	56	43	75	28	35	37	60	53	66	81	50	52	32	76	41	69	50	64	60
67	37	46	52	59	62	59	32	71	27	64	80	71	74	41	67	37	50	30	74	24	52	59	44	46	72	56	71	61	52	53	56	44	77	28	36	37	61	53	66	82	51	53	32	77	42	70	50	65	62
65	36	41	52	56	58	58	39	69	26	62	73	70	74	42	65	36	49	29	65	26	49	55	42	46	70	61	65	63	47	52	56	42	71	29	35	38	57	54	64	77	49	51	32	69	36	66	47	61	61
67	37	46	52	59	62	60	32	72	27	64	81	72	74	41	67	38	51	30	75	24	52	59	44	45	72	56	71	61	52	53	56	44	77	28	36	37	61	53	66	83	51	53	32	77	42	70	50	66	61
79	35	45	49	59	54	54	31	70	25	75	72	67	68	37	62	34	53	31	64	23	47	57	40	44	70	61	68	56	44	54	53	56	67	28	39	39	56	46	65	69	62	49	29	73	39	66	46	63	57
81	36	46	50	60	55	55	32	71	25	77	71	67	70	37	63	35	54	32	65	24	48	58	40	43	72	62	67	57	45	55	52	57	68	29	39	39	57	47	66	71	63	50	30	75	40	67	46	64	56
83	32	51	50	55	54	54	28	70	23	78	77	66	65	33	60	31	52	29	70	21	44	57	36	37	72	55	70	54	40	53	47	60	64	25	33	34	53	45	66	72	64	44	26	77	41	70	43	62	55
51	47	40	53	56	44	53	45	58	33	50	59	61	62	54	56	42	47	35	58	40	40	65	34	47	47	61	57	64	48	65	67	36	54	46	52	46	51	54	66	54	43	51	48	60	35	54	62	51	56
74	37	53	59	59	57	54	32	82	28	71	87	82	71	41	63	36	48	31	70	25	45	56	42	43	65	53	76	58	44	54	55	50	66	30	39	39	55	48	63	72	58	48	29	85	41	77	49	60	64
60	30	41	54	61	56	48	27	62	23	57	68	65	59	33	50	36	42	34	62	21	43	50	40	37	54	45	74	49	39	48	47	39	54	27	34	34	62	42	57	59	48	41	25	68	40	61	52	49	49
61	30	42	54	61	52	48	27	63	23	58	70	65	59	33	51	33	43	30	64	20	43	51	40	37	56	45	72	48	40	47	47	40	55	26	34	34	63	42	58	61	50	41	24	70	41	63	52	50	51
62	30	42	54	62	53	49	27	64	23	59	71	66	60	33	52	34	43	30	65	21	44	52	40	37	56	46	73	49	40	48	47	40	55	27	34	34	63	43	59	61	50	42	25	70	41	64	53	50	50
65	36	43	60	57	53	57	32	66	24	70	70	65	70	37	59	34	48	36	60	24	46	54	47	45	70	54	62	57	45	51	58	40	59	28	36	36	50	59	61	72	54	49	35	65	47	81	45	54	56
60	30	45	58	48	50	48	24	62	20	64	62	57	58	30	54	30	41	35	57	18	37	50	43	41	60	45	64	49	37	46	49	42	66	26	31	29	72	44	57	62	58	41	28	64	45	63	52	57	49
63	41	38	47	57	53	52	43	61	26	60	73	68	79	44	66	32	54	38	55	30	43	57	46	40	61	50	63	51	52	54	58	45	63	30	41	39	52	44	62	64	50	56	37	67	34	64	47	64	66
55	39	35	46	42	54	48	39	57	32	52	54	58	56	45	46	45	38	26	46	36	37	42	36	45	53	61	57	73	35	45	57	34	50	39	42	42	46	60	45	61	41	39	37	54	29	53	54	45	53
60	41	38	48	53	45	52	43	59	31	57	56	59	60	48	50	40	52	28	54	35	40	52	33	45	56	77	54	73	39	52	62	45	52	39	41	42	44	58	57	60	48	43	38	58	35	54	51	52	52
61	42	38	47	51	46	53	41	58	32	58	56	60	60	46	51	41	53	29	55	37	40	52	33	45	57	75	55	76	40	51	64	45	53	41	42	43	45	59	56	61	49	44	40	58	36	54	52	52	53
57	29	42	58	46	46	46	29	64	21	61	61	57	56	34	49	31	41	34	51	20	39	46	45	41	57	49	59	50	36	43	46	38	57	25	30	30	58	47	49	60	58	40	28	59	45	62	43	51	52
74	36	52	58	58	55	53	33	82	27	70	85	80	70	42	62	34	47	31	69	24	44	55	41	43	64	53	75	56	43	52	53	49	64	29	37	38	53	48	61	70	58	46	29	83	41	76	48	59	64
75	36	53	59	59	56	53	33	84	27	71	86	81	71	41	62	34	48	31	70	25	45	55	42	43	65	54	76	57	44	53	54	50	65	29	38	38	54	48	62	71	59	47	29	85	41	77	49	60	63
36	51	18	42	42	32	41	48	38	40	41	36	40	42	66	42	49	42	43	38	45	44	46	40	59	39	46	34	45	51	54	53	20	37	44	65	57	35	49	44	38	35	53	51	37	35	39	41	35	56
45	46	25	47	60	45	55	56	48	37	43	45	53	51	60	49	50	54	34	52	49	44	55	33	44	46	65	44	61	43	63	60	25	42	44	62	53	37	67	59	47	37	44	45	46	34	43	46	39	56
45	44	28	46	62	45	55	52	52	34	43	49	53	54	63	50	48	55	32	53	45	44	53	35	45	45	66	45	62	47	61	61	26	41	42	57	52	37	61	57	48	35	47	45	48	34	46	46	38	57
68	32	42	54	56	46	48	33	66	23	64	66	67	58	36	52	29	44	28	59	23	37	51	36	38	58	55	63	50	39	47	51	47	56	28	35	33	47	45	56	57	56	40	28	69	38	60	46	55	52
58	38	34	43	63	44	57	42	56	25	55	57	57	66	51	54	34	65	37	54	30	43	58	43	40	56	61	52	49	53	57	52	39	48	31	46	39	41	46	61	54	47	54	34	53	40	53	38	50	61
64	34	38	46	67	55	57	31	59	26	61	65	59	58	37	57	36	64	31	76	23	52	58	40	37	61	52	59	46	47	54	45	44	52	26	38	37	46	48	68	61	47	45	28	65	51	59	39	51	44
66	35	39	47	65	56	58	32	61	26	63	67	61	59	38	58	37	66	32	77	23	53	60	41	38	63	53	61	47	48	55	46	45	54	27	39	38	48	49	70	62	48	46	29	66	52	60	40	53	45
70	34	41	48	61	53	57	30	62	26	66	66	60	58	36	56	36	63	31	75	22	52	58	39	38	67	55	61	48	47	53	44	50	56	26	38	37	49	46	68	64	53	46	27	69	51	61	41	57	47
69	38	40	48	69	53	59	35	64	26	65	65	63	66	41	64	35	61	35	69	26	49	62	44	38	65	59	60	50	50	57	50	46	57	30	43	40	48	48	70	62	52	50	32	66	46	61	43	58	51
69	37	42	49	66	51	60	32	65	25	65	65	62	66	39	61	35	63	34	69	25	47	63	41	40	65	59	62	50	51	58	50	49	59	30	41	39	51	46	71	63	51	52	31	66	46	61	45	60	50
48	43	24	37	55	40	53	45	43	35	46	44	45	51	50	48	46	70	37	53	37	40	55	35	41	46	51	42	48	48	57	50	32	40	37	53	51	37	49	62	45	36	47	40	45	42	41	42	42	50
64	37	39	47	70	49	60	36	61	24	61	63	59	70	42	60	34	68	38	65	28	44	65	40	38	63	57	59	49	55	60	52	46	56	30	44	39	49	44	74	60	49	55	33	63	44	58	42	58	54
48	41	25	37	55	39	52	44	43	33	46	44	44	51	49	49	45	69	38	53	36	40	57	33	41	45	50	42	47	47	57	49	33	40	37	53	49	37	49	61	44	36	48	40	45	43	41	43	42	49
65	35	38	46	64	54	58	31	60	26	62	65	59	57	39	58	37	64	32	76	23	53	60	40	38	61	51	59	46	48	55	45	44	53	27	39	38	47	48	69	61	48	46	28	65	52	60	39	52	47
63	35	37	51	62	53	56	35	63	28	60	63	63	57	40	60	38	64	33	74	25	49	60	40	39	59	55	57	50	47	56	48	44	53	30	39	39	47	50	67	58	46	46	31	64	50	57	42	53	47
49	44	27	39	59	42	53	45	46	31	47	48	49	55	53	51	41	63	36	54	34	39	56	38	41	46	54	44	48	48	58	56	33	42	36	55	46	37	49	62	45	37	47	41	48	39	44	45	44	51
51	43	28	40	59	43	53	47	48	32	49	50	50	55	53	51	42	66	35	56	35	41	56	38	40	48	54	45	49	48	57	54	35	42	35	54	47	37	51	62	47	39	47	40	50	40	45	44	44	53
45	43	23	40	51	37	50	44	44	35	43	42	46	48	52	46	46	65	37	50	38	37	53	32	42	43	50	39	46	44	57	47	31	38	39	53	51	35	46	57	42	34	45	39	43	40	38	42	40	50
66	35	38	47	66	55	58	32	60	27	62	66	60	58	38	58	37	67	32	77	24	53	60	41	38	63	53	60	47	48	55	46	45	53	27	39	39	47	49	69	62	48	46	29	66	52	60	39	52	46
65	35	39	48	62	56	60	30	61	27	62	65	59	58	36	59	39	65	33	79	23	58	63	39	40	63	53	60	48	50	57	47	46	55	27	38	39	48	48	71	63	50	48	28	68	53	59	40	54	47
69	34	40	46	63	50	57	31	61	26	65	62	57	55	38	53	36	63	32	70	23	52	59	40	38	63	56	58	47	47	54	42	45	52	27	38	38	45	47	64	62	53	46	28	64	51	58	38	53	49
51	40	26	36	54	35	51	42	44	33	49	42	43	48	48	45	44	68	37	47	36	39	56	32	41	45	55	40	48	46	57	46	32	38	37	52	50	34	48	54	45	41	47	39	44	42	40	41	42	51
51	42	25	36	54	36	53	44	44	35	48	42	43	49	48	44	46	70	37	48	37	39	55	33	42	47	55	40	49	47	57	47	32	39	37	53	50	34	49	57	46	41	47	40	44	42	40	41	42	51
71	32	47	58	61	52	54	35	73	24	68	76	75	67	40	56	33	57	29	69	23	45	56	40	39	64	59	69	57	42	52	50	53	58	26	36	35	51	48	64	68	55	44	27	73	44	67	45	58	53
66	35	39	48	64	55	59	31	61	27	63	66	60	58	37	59	37	65	33	79	23	54	61	40	38	63	51	60	47	49	55	45	46	54	27	39	38	48	48	71	63	49	47	28	67	53	60	40	54	45
67	34	39	46	67	56	58	32	60	26	62	64	60	59	37	59	38	67	31	76	23	55	60	39	37	63	53	60	47	47	56	45	45	52	27	40	39	47	48	69	60	47	47	28	65	51	59	40	52	44
65	34	37	46	65	55	57	31	58	26	60	64	59	57	37	56	37	65	31	75	22	54	58	40	39	62	51	59	45	46	53	46	44	52	26	39	37	46	46	68	59	46	46	27	64	50	57	39	51	45
75	32	51	54	63	55	55	30	73	23	71	78	70	68	37	58	32	56	28	74	21	46	56	38	37	68	56	70	56	43	52	49	56	61	24	35	34	51	47	66	73	59	45	26	79	45	72	44	60	54
76	31	52	54	63	54	54	29	74	23	72	78	70	67	37	59	32	55	28	74	21	46	57	37	36	67	56	69	55	42	53	48	57	62	25	35	34	52	46	65	72	60	46	25	79	45	71	45	60	53
66	31	40	46	54	51	55	27	58	24	63	63	57	58	32	52	36	57	32	64	20	46	56	38	37	62	51	65	49	40	51	43	49	56	28	35	34	64	44	63	64	52	44	25	63	43	58	50	54	48
66	32	40	45	54	51	53	27	58	24	62	63	56	58	32	52	36	57	32	63	20	45	55	39	36	61	51	64	48	39	50	43	48	55	28	33	34	64	43	63	63	50	44	25	63	43	58	51	53	48
77	31	52	54	63	54	55	29	74	23	73	77	69	68	37	58	32	56	28	75	21	46	58	37	36	67	56	70	56	42	53	48	57	62	25	35	34	52	47	66	72	60	46	26	80	45	71	45	60	53
75	31	50	56	62	53	55	29	72	24	72	76	69	67	35	57	33	57	29	76	20	47	58	37	37	66	54	68	53	43	52	47	57	62	25	36	33	53	46	66	72	61	45	26	81	47	68	44	61	52
66	33	41	56	55	46	47	33	67	25	63	65	69	57	38	51	30	44	28	58	25	37	50	36	40	57	55	62	51	38	48	52	46	55	29	36	35	46	44	55	56	55	40	29	68	37	59	47	54	53
76	34	45	58	59	48	50	32	74	27	72	71	72	59	37	51	33	49	30	61	24	43	54	40	41	61	54	66	50	41	52	46	49	56	27	37	37	47	47	56	62	62	43	27	72	43	64	43	55	57
53	43	31	41	64	57	58	40	54	27	51	55	52	60	44	56	46	61	51	53	31	52	62	49	47	52	52	56	45	56	59	54	31	54	35	51	45	52	43	65	54	43	58	37	53	38	49	44	50	60
40	43	21	44	47	36	46	46	41	31	46	42	44	47	61	47	40	48	50	43	35	51	53	48	55	43	40	39	39	58	58	50	22	42	35	58	49	39	46	50	42	40	61	49	42	39	43	38	40	62
56	46	33	44	56	61	57	42	58	32	53	67	62	64	47	78	39	53	37	67	29	53	63	49	48	59	47	59	51	58	59	60	35	69	34	42	46	56	50	69	65	45	60	37	62	39	58	45	63	63
59	47	35	45	57	62	57	40	61	32	54	65	62	68	47	82	40	53	38	68	30	55	66	47	46	60	49	58	52	60	61	59	36	71	35	43	47	58	51	70	66	46	64	38	64	40	59	47	64	61
59	45	33	43	61	64	57	43	59	31	55	65	62	66	47	81	41	56	36	68	30	56	64	48	45	61	50	58	51	57	61	58	35	67	34	44	48	55	52	69	63	44	61	37	62	38	59	45	61	59
54	45	32	49	53	60	55	39	57	31	60	62	58	63	45	75	38	50	43	65	29	52	62	53	51	65	47	55	50	57	57	63	34	67	33	41	44	55	55	67	63	51	58	43	61	45	64	45	61	59
55	42	39	47	56	45	50	45	59	30	52	58	61	66	61	53	38	46	31	53	37	37	54	36	45	49	65	57	66	45	56	67	40	51	39	47	44	44	53	60	55	43	47	42	58	30	54	54	49	60
20	20	21	16	19	20	21	16	22	15	19	20	18	19	14	23	17	20	24	21	12	20	25	24	20	18	18	23	16	22	22	17	22	26	24	16	17	30	15	22	21	21	24	19	20	18	18	23	24	19
47	39	32	55	52	42	43	42	52	33	45	50	58	50	48	41	41	40	30	46	43	34	45	34	42	42	54	54	64	37	51	59	29	42	42	55	43	44	52	49	47	38	38	36	50	32	46	55	39	54
49	43	21	33	41	43	43	36	45	36	46	45	42	41	32	45	39	48	47	44	30	48	49	51	41	44	39	46	35	45	44	34	29	48	41	37	42	47	37	45	46	43	49	39	47	41	41	42	51	42
56	39	30	46	59	49	65	34	52	28	61	54	50	62	42	63	38	70	46	64	27	50	67	47	47	61	51	50	44	56	60	53	39	53	31	47	42	47	51	72	56	51	54	41	55	55	55	37	52	47
59	37	35	45	49	58	49	31	56	27	57	60	57	57	34	65	34	45	36	62	23	48	57	44	40	59	46	62	46	45	51	48	46	72	33	35	36	63	45	60	61	56	50	31	63	41	55	50	78	51
80	33	47	56	46	49	47	29	70	27	84	69	64	58	30	53	30	47	37	58	21	45	51	40	41	68	50	60	51	39	45	46	59	61	27	35	31	51	47	52	70	80	44	32	78	48	69	43	61	52
53	36	29	38	54	44	52	31	46	24	51	46	45	51	38	52	34	56	43	48	26	43	59	43	35	46	43	49	38	49	54	43	35	44	35	41	36	51	39	57	48	42	51	31	46	41	42	41	46	46
60	38	38	51	59	51	56	30	62	30	58	59	59	55	40	57	42	63	33	72	25	52	62	37	43	57	53	55	49	47	58	48	44	53	32	41	42	47	48	66	58	48	48	29	63	50	54	43	54	49
63	34	39	48	65	54	57	28	59	26	60	63	57	56	35	56	37	62	31	76	22	54	60	37	38	61	51	58	48	49	54	46	45	54	27	36	37	47	46	68	62	49	47	27	66	53	57	40	53	45
65	34	42	50	56	62	55	30	63	25	62	69	62	62	34	58	38	47	34	70	22	47	55	43	39	65	49	74	51	41	50	49	42	64	29	37	36	70	48	65	68	51	45	28	69	41	63	55	56	53
63	36	44	56	61	58	58	35	70	26	60	74	72	70	40	62	38	50	30	69	25	51	57	40	43	66	62	65	64	47	55	56	42	68	30	38	38	57	53	65	73	48	50	31	72	39	68	51	60	59
44	39	25	40	47	42	48	35	45	27	49	44	40	48	41	49	38	46	57	44	28	47	52	57	45	45	36	46	36	56	47	46	25	43	35	44	39	49	41	52	45	41	64	44	44	40	47	40	40	48
51	49	33	52	52	43	43	50	57	36	48	61	68	59	48	50	39	39	30	49	40	37	47	36	48	46	60	57	60	40	48	65	32	50	45	46	46	46	55	52	50	39	43	46	58	31	55	61	47	52
59	41	42	61	69	48	59	37	70	28	57	65	68	69	42	55	36	55	40	59	31	45	63	39	44	52	50	61	53	55	61	55	37	57	34	49	43	51	45	66	61	51	56	33	66	43	60	51	53	61
80	35	55	52	57	60	59	31	76	25	75	83	71	71	36	64	34	51	31	76	23	49	60	39	40	71	54	75	58	43	56	51	56	70	27	36	36	57	49	68	79	61	48	29	84	42	76	46	62	60
79	35	54	52	56	60	58	31	76	25	75	83	71	70	36	64	34	51	31	76	23	50	59	39	40	71	53	75	58	43	55	51	55	69	27	36	36	57	49	68	79	60	48	29	84	41	75	46	62	60
63	36	44	47	48	61	45	31	68	27	59	72	66	66	37	62	37	40	33	58	24	46	48	48	40	59	47	74	54	44	45	50	43	66	29	32	36	60	43	53	69	49	49	29	71	35	67	60	58	56
54	45	29	44	49	49	47	46	50	35	51	55	57	50	47	52	42	50	27	55	38	40	48	34	42	55	67	50	61	36	49	57	37	47	40	42	45	41	60	54	49	42	36	41	53	36	50	50	48	47
43	36	33	54	41	42	37	36	50	25	46	50	51	46	43	44	35	31	28	45	28	32	38	36	49	47	55	51	57	33	40	60	29	52	35	37	36	58	51	43	45	42	34	41	50	36	51	63	46	45
41	63	21	37	49	48	46	50	46	52	39	46	50	45	59	49	72	47	33	50	46	69	48	45	64	45	61	43	54	55	51	53	20	44	49	60	68	40	56	50	48	33	55	48	43	33	43	45	38	47
70	37	46	54	61	53	57	34	68	24	66	72	68	73	42	59	31	56	36	64	26	42	60	42	41	65	55	68	54	54	56	58	50	66	30	42	36	55	44	67	67	59	54	31	72	43	64	46	65	64
62	38	41	50	67	64	62	35	66	27	59	73	69	76	43	70	39	54	30	74	26	55	60	44	46	68	58	68	59	54	56	58	38	69	29	38	42	56	58	68	75	46	53	32	70	43	68	47	59	54
50	42	29	44	44	51	44	43	50	34	48	48	50	46	45	49	42	38	34	53	34	38	46	39	44	47	55	53	56	36	46	56	34	52	43	43	42	52	54	52	49	41	39	41	51	32	44	63	49	47
54	39	28	38	56	42	59	39	49	29	52	49	46	56	41	56	37	77	49	58	30	45	63	40	36	48	43	45	38	57	57	44	38	46	34	44	42	42	40	67	50	42	57	36	50	50	44	35	50	50
64	42	44	55	73	48	60	36	68	26	59	68	66	77	42	60	33	57	40	59	29	46	64	40	41	52	51	61	53	56	60	55	39	57	32	45	40	51	46	65	65	51	58	37	68	43	63	46	52	61
64	43	44	55	74	48	59	37	69	26	59	68	66	77	42	61	32	57	40	59	29	45	64	40	41	53	52	62	52	56	60	55	39	58	32	45	40	52	46	66	64	51	57	37	68	43	64	46	53	61
63	42	44	55	73	49	60	36	69	25	59	68	66	78	43	61	33	57	40	59	29	46	64	41	41	53	52	61	53	57	60	55	39	58	31	45	40	52	45	66	65	50	58	36	68	42	64	46	53	62
44	50	27	40	55	53	50	50	48	32	42	48	50	56	55	58	46	45	42	48	40	40	56	42	44	43	56	50	58	51	57	70	24	48	44	50	46	43	56	55	48	36	50	48	47	31	45	53	44	52
67	36	46	49	55	60	54	30	66	24	63	67	61	62	33	58	35	44	35	66	22	44	57	44	38	60	49	75	51	41	53	48	50	66	30	36	34	66	43	65	65	57	45	29	71	35	62	54	61	54
43	45	26	41	47	46	50	33	48	30	41	50	45	52	43	64	40	44	39	53	25	61	55	48	48	44	40	44	38	67	49	42	23	62	35	42	44	55	40	53	51	41	63	39	49	44	44	39	54	44
47	47	27	40	60	48	57	41	54	33	45	52	48	54	50	63	43	50	47	57	30	64	62	54	51	45	46	47	41	68	57	48	25	53	39	54	51	48	43	58	51	41	66	42	52	42	47	40	47	50
54	48	34	46	65	53	52	44	57	32	50	60	62	70	51	60	45	52	34	58	35	47	54	39	49	59	59	58	55	52	60	62	33	62	35	53	52	52	50	62	60	41	55	41	60	33	56	50	55	65
34	58	16	35	49	36	45	53	37	46	31	36	40	46	67	45	53	45	35	39	56	45	47	40	56	34	52	35	57	62	52	55	14	35	58	61	65	32	54	46	37	26	54	51	34	27	34	44	32	47
70	35	48	52	59	62	55	31	72	25	66	81	70	76	39	62	37	49	27	71	23	54	53	40	41	73	55	71	64	48	49	54	45	68	25	33	37	54	53	62	85	52	51	28	77	41	74	46	60	58
54	43	35	50	73	58	64	39	59	28	51	62	58	68	45	68	36	56	43	69	29	50	74	43	43	57	48	57	49	61	68	62	34	63	34	50	42	54	48	77	60	47	58	36	64	43	56	45	57	59
65	42	38	50	49	46	49	44	61	30	62	59	61	63	52	54	38	48	30	53	36	37	51	35	48	58	69	57	69	43	52	64	45	56	40	48	44	47	57	57	59	51	45	42	63	34	57	55	55	57
67	36	38	50	55	56	53	33	66	26	64	65	65	61	39	59	37	50	34	62	24	43	53	46	44	64	58	67	52	42	52	49	46	62	32	39	38	60	45	62	62	51	44	29	63	37	58	50	58	56
59	41	33	47	49	50	47	42	58	31	56	56	61	54	47	51	42	45	30	54	33	38	47	40	50	56	69	59	62	37	48	61	41	54	41	44	43	53	54	55	55	45	38	38	56	33	51	59	51	53
61	41	34	47	51	51	48	42	58	32	58	56	60	56	47	53	43	46	30	55	34	39	48	40	48	57	70	59	63	38	50	60	42	55	42	44	44	54	56	56	56	46	40	39	57	33	53	60	52	52
68	29	45	50	61	57	51	29	65	22	65	71	65	63	34	52	35	53	30	68	20	43	52	43	34	62	52	71	51	39	49	45	50	55	25	33	32	55	45	61	66	53	41	24	71	42	65	47	54	49
68	29	45	50	61	57	51	29	65	22	65	71	65	63	34	52	35	53	30	68	20	43	52	43	34	62	52	71	51	39	49	45	50	55	25	33	32	55	45	61	66	53	41	24	71	42	65	47	54	49
68	44	40	50	51	48	51	44	62	32	65	62	64	65	51	56	40	50	31	55	35	39	53	36	46	60	69	59	72	44	54	66	47	58	42	50	43	49	59	59	62	53	47	43	65	36	59	58	58	59
51	40	31	47	60	47	53	43	55	29	48	51	55	58	46	48	41	50	37	49	33	38	54	39	42	50	54	54	50	42	59	51	30	47	37	50	45	53	49	58	52	41	47	34	50	32	48	51	44	60
60	33	41	53	52	61	49	31	63	24	66	74	64	67	37	59	35	42	33	63	23	51	50	47	47	77	50	66	53	43	47	58	40	67	25	34	36	53	55	56	69	57	47	34	69	43	78	46	58	59
30	58	11	38	33	33	32	55	34	49	35	31	38	32	53	36	48	32	40	32	53	41	33	49	51	35	47	30	46	37	41	49	13	30	53	51	55	28	57	34	30	29	36	58	30	31	39	44	28	39
31	60	11	37	32	33	32	58	35	50	34	32	39	33	52	37	46	32	41	32	52	40	34	50	54	35	45	30	46	40	41	52	14	32	53	52	56	29	57	35	32	30	38	60	31	30	35	46	30	41
40	54	14	32	40	39	38	43	42	43	36	39	42	41	43	49	40	37	45	39	36	52	44	53	42	35	33	36	34	50	47	35	17	40	42	45	50	37	36	41	38	31	52	40	38	30	36	35	39	44
57	33	39	52	60	52	52	36	65	23	55	69	67	71	39	59	33	47	34	58	25	41	55	43	39	56	53	67	53	46	52	53	37	56	30	37	38	62	44	62	60	45	47	30	66	34	64	54	52	55
57	33	39	52	60	52	52	36	65	23	55	69	67	72	40	59	33	47	34	58	25	40	55	43	39	56	53	67	53	46	52	53	37	56	30	37	38	62	44	62	60	45	47	30	66	34	64	54	52	55
61	34	42	50	63	54	55	34	66	23	58	72	68	73	38	63	34	49	35	61	25	43	59	45	39	58	52	72	53	48	54	55	40	60	31	38	39	66	46	65	64	48	51	31	70	36	67	55	55	56
57	38	35	48	63	54	55	44	60	25	53	64	62	78	49	65	37	52	35	57	30	48	59	42	42	61	59	59	55	57	56	62	36	64	31	44	44	52	47	64	62	45	62	35	61	32	61	47	60	66
62	34	42	53	52	61	50	32	64	25	65	77	67	69	39	61	34	41	32	65	23	50	51	47	47	76	50	68	54	44	48	60	41	68	25	33	37	54	55	57	71	57	48	33	71	43	76	47	60	61
62	41	35	43	68	51	60	39	59	26	59	60	57	69	45	60	40	68	39	55	30	54	64	42	43	63	71	55	52	58	61	57	38	57	32	47	45	50	47	66	62	51	62	36	59	39	57	44	56	61
61	43	33	45	65	49	59	39	60	27	58	57	58	66	45	59	42	67	38	53	32	52	63	39	45	62	70	53	53	55	63	55	37	56	34	48	46	49	47	65	61	49	61	35	56	37	53	42	55	62
62	35	39	47	61	52	57	34	60	23	59	64	59	69	39	62	33	51	39	61	26	41	61	43	37	58	48	65	49	49	56	52	41	60	31	41	36	65	44	67	61	47	54	32	63	35	58	53	57	61
46	47	20	32	43	37	45	39	45	37	44	44	42	43	35	50	39	52	50	44	31	50	52	49	46	41	37	42	34	53	47	39	25	48	41	40	44	42	37	48	45	40	56	42	44	42	39	37	50	45
67	39	45	54	60	54	59	37	65	26	70	64	60	70	38	65	32	54	47	66	27	44	64	44	44	66	47	66	50	51	59	59	48	65	31	44	38	54	49	73	64	62	57	40	69	42	66	46	62	60
72	35	48	55	53	59	55	31	68	25	77	75	64	64	33	59	33	47	37	73	22	47	56	43	44	76	49	71	53	41	52	53	53	67	27	35	35	55	52	65	72	68	46	34	77	45	76	46	62	57
67	40	49	51	65	57	63	38	70	26	64	73	67	75	43	66	35	56	40	71	28	46	67	44	43	63	50	74	53	56	61	60	48	67	31	46	41	56	46	77	68	54	58	35	73	39	65	48	62	67
70	42	47	48	63	56	62	41	68	27	66	67	63	72	40	64	33	56	43	67	30	45	65	42	39	62	48	69	52	52	60	55	51	66	32	45	39	54	46	76	67	56	56	36	70	36	62	47	63	63
68	40	49	52	66	57	64	38	70	26	64	73	68	75	43	66	35	56	40	71	28	46	66	44	44	63	50	74	53	56	61	59	48	68	31	45	41	56	47	76	68	54	57	35	74	39	66	48	62	67
76	33	52	56	54	58	56	30	72	24	80	79	68	67	35	61	33	49	36	73	22	47	57	44	44	76	52	72	56	41	53	55	53	66	26	35	35	55	53	65	75	65	46	33	80	46	80	45	60	58
76	33	53	56	55	57	55	30	73	24	80	79	69	68	36	61	33	48	35	71	22	48	57	44	43	75	52	72	56	41	53	55	54	65	26	35	35	54	53	64	74	65	46	32	80	45	81	45	59	58
78	34	56	54	58	61	58	31	77	25	74	84	72	71	37	63	34	50	31	77	22	48	59	40	39	70	53	76	58	45	55	52	55	68	27	36	36	56	48	67	78	60	47	28	85	42	76	47	61	59
74	34	51	54	53	58	54	30	71	25	76	77	66	66	34	61	32	47	35	71	21	46	55	42	43	72	50	70	55	41	51	53	55	68	26	34	34	56	50	63	74	66	46	31	78	44	77	45	62	58
69	43	47	57	56	58	56	38	75	31	65	71	73	65	42	61	39	47	33	67	29	46	58	40	47	62	58	69	58	43	60	54	50	68	34	44	43	57	50	66	68	57	47	34	73	37	65	52	62	63
83	36	56	50	54	59	56	32	78	27	78	77	68	66	36	65	34	48	33	73	23	50	57	41	39	66	52	73	56	43	54	49	59	68	29	36	37	57	47	66	75	60	49	29	81	38	71	48	62	57
75	33	54	57	53	55	55	28	72	24	81	76	66	65	33	60	33	48	36	73	20	47	57	41	44	74	50	71	54	41	52	53	55	66	26	35	33	55	52	65	75	68	46	32	81	47	77	45	61	56
75	38	51	56	52	57	55	34	82	30	72	73	72	63	40	63	36	48	34	69	26	46	56	40	43	62	53	69	56	43	55	48	54	66	31	39	39	55	46	64	70	57	48	30	76	36	66	48	61	59
60	48	43	50	59	51	55	50	63	34	57	62	64	67	55	58	42	50	35	61	42	40	58	37	47	55	63	64	67	49	58	70	42	58	44	51	48	49	58	66	59	47	50	45	63	34	59	59	53	60
60	47	42	50	59	51	55	49	63	33	57	61	63	67	53	58	40	50	35	61	42	40	58	37	47	55	61	63	67	48	59	68	42	57	44	52	49	49	60	66	58	47	50	47	63	34	58	62	53	61
76	39	52	54	52	57	56	33	81	30	73	73	71	64	38	63	37	48	34	70	25	47	56	40	42	63	52	69	57	43	55	49	56	67	32	39	38	56	46	65	71	58	48	30	77	37	66	48	63	58
65	39	47	56	63	55	61	37	68	25	70	68	63	73	41	63	34	54	45	68	27	45	64	46	46	67	49	69	52	54	59	62	46	65	30	45	40	54	51	74	66	59	56	39	71	43	72	47	60	62
75	39	51	55	53	56	54	35	79	29	70	74	74	65	39	60	36	48	33	67	26	45	54	40	40	63	52	69	56	41	53	49	55	64	31	39	38	53	47	63	69	57	46	31	75	35	68	48	60	60
75	36	50	50	51	65	61	30	70	27	71	70	62	60	33	58	33	45	33	72	22	47	56	37	38	64	46	71	51	41	50	46	55	67	28	35	34	55	45	65	71	60	46	29	76	38	64	46	61	54
68	37	47	60	51	55	52	32	73	28	70	71	74	64	38	58	36	46	34	65	25	42	53	41	46	66	53	66	59	40	54	55	51	64	30	38	38	53	51	61	68	61	45	33	72	41	71	47	59	61
75	33	52	56	54	57	56	30	72	24	80	79	68	68	35	61	33	49	36	72	22	47	57	44	44	75	51	72	56	41	53	55	53	66	26	35	35	55	53	65	75	65	46	32	80	46	80	44	59	58
74	34	50	54	53	58	55	30	69	24	78	74	64	64	33	60	32	46	36	71	22	47	55	43	43	73	49	71	53	40	52	53	54	65	27	34	36	54	52	64	70	68	46	32	76	44	76	46	61	56
70	33	47	53	51	62	53	30	67	24	74	70	63	62	33	57	35	44	40	67	22	44	53	43	42	70	49	72	52	39	51	52	51	63	28	34	35	54	50	62	66	64	44	32	72	42	73	46	59	55
71	34	49	60	53	55	55	33	72	25	75	74	70	67	37	60	34	48	35	68	24	44	56	43	44	71	54	69	60	41	54	57	50	63	28	36	36	53	55	64	70	62	45	34	75	43	76	46	59	58
71	34	50	56	53	59	54	29	70	25	76	74	64	63	33	58	33	46	37	74	21	47	55	43	44	74	47	71	51	42	50	53	53	67	27	35	34	55	50	64	70	69	45	33	78	45	76	47	62	55
68	33	48	55	52	63	52	29	68	25	73	71	63	62	33	57	35	44	40	70	22	45	54	43	43	69	47	74	51	40	50	53	51	63	28	34	34	55	50	61	66	64	44	32	73	43	73	48	59	54
76	33	53	56	55	57	55	30	73	24	80	79	69	69	36	61	33	48	35	71	22	48	57	44	43	75	52	72	56	41	53	55	54	65	26	35	35	54	53	64	74	65	46	32	80	45	81	45	59	58
72	33	50	55	53	61	54	29	70	24	76	74	66	66	35	59	36	47	39	68	22	45	55	43	43	71	51	74	55	40	52	54	51	63	27	34	35	55	51	62	70	61	45	32	75	43	77	45	57	56
72	33	50	55	53	61	54	29	70	24	76	74	66	65	35	59	36	47	39	68	22	45	55	43	43	71	51	74	55	40	52	54	51	63	27	34	35	55	51	62	70	61	45	32	75	43	77	45	57	56
77	33	53	56	54	56	55	29	72	24	81	76	67	66	34	60	32	47	35	71	22	47	57	41	43	74	52	72	55	40	53	54	54	65	26	35	35	54	53	64	73	66	46	32	79	46	78	45	59	56
74	36	51	56	57	56	58	30	72	25	78	76	68	70	36	64	33	49	37	70	23	46	59	45	45	73	54	71	56	43	56	57	52	68	28	37	36	56	53	67	72	63	48	34	77	44	78	47	60	58
76	33	52	55	54	57	55	29	72	24	80	78	68	67	35	62	33	48	35	71	22	48	57	43	43	75	52	72	56	41	53	55	53	65	26	35	35	54	53	64	74	64	46	32	79	45	81	45	59	58
76	35	51	50	54	60	56	31	72	25	72	80	69	66	36	62	33	47	31	74	22	48	57	40	40	68	51	76	55	42	53	50	56	68	28	35	37	56	47	66	72	62	47	28	78	39	71	47	64	60
72	37	50	56	58	55	59	31	72	25	77	75	68	72	37	65	33	50	38	68	24	45	61	46	45	72	54	70	56	44	57	59	51	67	30	38	37	56	53	68	71	62	49	36	75	44	77	47	62	58
71	36	50	56	59	56	58	31	72	24	75	75	68	71	37	64	33	49	38	69	23	45	60	47	45	70	53	70	55	45	56	60	50	65	29	37	36	55	52	67	69	61	48	35	76	44	77	48	61	57
74	36	51	56	57	56	58	30	72	25	78	76	68	70	36	64	33	49	37	70	23	46	59	45	45	73	54	71	56	43	56	57	52	68	28	37	36	56	53	67	72	63	48	34	77	44	78	47	60	58
64	43	42	50	50	53	50	44	64	35	61	68	66	59	48	54	40	43	29	63	36	41	51	37	47	59	61	67	69	37	52	61	46	59	42	43	45	50	63	59	62	52	42	42	66	34	61	62	56	59
72	34	49	55	52	58	55	29	68	25	77	73	63	62	32	59	33	46	37	73	21	47	56	42	44	75	47	70	52	41	51	52	54	67	27	35	34	56	51	65	71	70	46	33	77	45	75	46	63	56
71	36	51	56	59	56	58	31	73	24	75	76	68	72	37	63	32	49	37	68	23	45	59	47	44	70	53	70	55	45	56	60	50	65	29	38	36	54	52	67	69	61	48	35	76	43	78	48	60	58
74	34	50	56	55	59	54	32	69	25	78	75	66	65	34	59	32	46	37	71	23	48	55	44	43	74	49	72	53	40	52	54	54	65	27	35	35	54	53	64	70	69	45	33	76	45	77	46	61	57
77	34	54	51	56	59	57	30	73	25	73	81	70	68	35	60	34	51	31	74	22	49	58	38	41	71	53	75	56	42	53	52	55	67	27	37	35	56	48	67	77	60	47	28	82	41	72	46	61	60
75	33	53	58	56	58	55	29	73	24	79	80	69	68	36	60	33	48	35	73	22	46	56	44	43	75	51	73	56	43	52	55	52	65	26	35	34	54	52	64	74	64	45	32	81	47	81	45	59	57
75	33	53	57	53	55	55	28	71	24	80	75	65	65	32	59	32	48	36	73	20	46	56	40	43	74	50	70	54	41	51	53	54	66	26	35	33	54	51	64	74	68	45	32	80	47	77	45	60	55
70	40	49	49	65	55	65	39	71	26	67	70	65	78	44	68	35	58	40	67	28	47	65	42	41	63	53	68	55	54	63	57	50	66	31	48	41	56	46	76	70	54	59	34	73	36	65	46	62	66
76	36	51	52	54	61	57	31	71	27	73	78	68	63	35	62	34	48	33	77	22	50	59	40	41	67	49	78	54	43	54	49	56	72	29	37	36	59	47	68	75	64	48	30	80	41	68	48	65	58
72	34	49	55	52	58	55	29	68	25	77	73	63	62	32	59	33	46	37	73	21	47	56	42	44	75	47	70	52	41	51	52	54	67	27	35	34	56	51	65	71	70	46	33	77	45	75	46	63	56
82	35	55	52	57	60	59	31	76	25	77	82	71	71	36	64	34	51	31	77	23	50	60	39	39	71	54	76	59	43	56	51	56	69	27	36	37	57	50	69	78	60	48	28	83	41	76	47	62	59
80	34	57	52	56	59	58	30	77	25	77	81	70	70	35	64	34	50	31	77	22	50	61	37	40	69	53	75	58	43	56	51	58	70	28	36	36	57	48	68	78	62	49	28	85	41	74	47	64	58
80	34	55	51	59	59	58	32	76	25	76	82	71	70	36	64	34	52	31	76	23	49	60	39	39	71	54	76	58	43	56	51	56	68	27	36	37	56	50	68	78	60	48	28	83	41	76	46	61	59
70	35	47	59	54	56	53	35	72	26	74	70	67	63	36	58	33	45	37	67	24	45	55	43	45	70	52	69	55	40	52	54	52	63	29	36	36	53	53	63	65	66	45	34	72	42	73	48	61	56
70	36	47	58	53	57	54	32	72	27	74	70	66	63	36	59	35	46	37	68	24	45	56	43	47	71	50	69	54	40	54	54	51	65	29	37	38	54	53	64	66	65	46	34	72	42	73	47	62	58
70	34	47	58	54	56	55	34	72	25	74	72	67	63	37	60	33	46	36	69	23	45	56	44	45	71	52	69	55	41	52	54	51	65	28	35	37	54	54	64	67	64	46	33	72	43	74	47	61	56
72	34	48	54	56	60	54	32	68	25	76	73	64	63	33	58	33	47	36	71	22	48	55	43	43	76	50	71	53	40	52	53	52	65	27	35	35	54	52	64	69	66	45	33	74	44	76	46	60	56
69	38	47	54	57	56	59	32	67	25	73	69	63	68	35	64	33	48	41	68	24	45	61	45	45	71	50	68	52	45	56	57	51	68	30	39	38	57	51	70	66	65	50	37	72	42	72	48	65	58
64	38	43	52	60	54	59	36	63	24	68	69	62	71	39	62	32	52	44	65	27	42	62	46	45	68	48	67	50	49	57	61	47	64	30	42	37	54	49	71	63	61	53	39	68	40	68	46	61	65
71	36	51	56	59	56	58	31	73	24	75	76	68	73	38	63	32	49	37	68	23	45	59	47	44	70	53	70	55	45	56	60	50	65	29	38	36	54	52	67	69	61	48	35	76	43	78	48	60	58
67	37	46	61	50	54	52	32	72	28	69	70	71	63	39	57	36	46	34	64	25	42	52	41	45	66	52	65	60	40	55	53	50	63	30	40	37	52	53	60	67	60	44	34	71	40	70	48	58	62
68	35	47	60	52	56	54	32	74	27	73	69	66	62	35	58	34	46	37	69	23	45	56	42	47	71	50	67	53	41	52	52	51	65	29	36	36	54	51	64	67	66	46	33	73	43	71	47	62	57
69	37	46	60	52	56	54	32	72	28	73	70	69	62	35	58	35	45	37	68	25	44	55	43	46	71	50	68	55	40	54	54	50	64	30	37	38	53	52	64	66	65	45	33	72	42	72	47	61	58
74	34	51	54	52	58	54	29	71	24	76	77	66	66	34	60	32	47	35	70	21	47	55	42	42	72	50	70	55	41	51	52	55	67	26	34	34	56	50	63	74	66	46	31	78	44	76	45	61	58
69	34	47	59	53	56	54	33	72	26	74	69	65	62	35	59	33	46	37	69	23	45	56	42	45	71	51	68	54	41	51	53	52	65	29	35	36	54	52	64	67	66	46	34	73	43	72	48	62	55
70	33	49	53	51	62	52	29	69	24	73	73	65	64	34	59	35	45	39	66	22	45	53	42	42	68	50	72	55	40	51	52	52	64	28	34	34	56	48	61	69	62	45	31	73	41	73	46	59	57
68	37	45	60	52	55	53	32	71	27	72	68	68	61	37	57	35	44	36	66	25	44	54	42	46	69	51	67	55	39	56	53	50	63	30	38	39	52	54	62	64	63	44	34	70	41	71	48	60	59
69	38	46	54	58	56	59	33	68	25	73	69	63	69	35	65	32	48	41	67	25	44	61	46	45	70	50	68	52	45	57	58	50	67	30	39	39	56	51	70	65	64	50	37	71	42	72	48	64	58
65	39	44	53	61	54	60	37	64	25	69	67	60	72	39	63	32	53	46	65	27	43	64	45	44	69	49	66	51	50	59	60	48	65	31	43	38	55	50	73	64	61	54	40	69	41	69	46	62	63
57	43	43	50	59	53	56	39	64	28	55	68	62	69	39	63	34	53	44	63	29	45	65	42	39	55	45	66	46	54	59	53	43	64	34	44	39	58	39	69	61	50	58	37	69	37	62	54	63	60
65	50	44	53	50	54	52	39	66	41	63	64	65	57	45	56	48	45	31	65	34	43	53	35	51	59	58	66	64	39	56	55	48	63	42	50	49	52	57	62	64	55	44	39	69	36	59	56	58	60
67	40	47	54	51	51	51	43	70	31	64	67	67	62	47	55	40	44	29	62	32	41	52	34	44	58	66	64	70	37	54	59	48	58	38	43	42	49	59	59	63	52	42	39	69	35	63	57	54	57
72	40	48	46	62	54	59	39	69	26	67	70	66	74	43	66	32	55	41	63	29	43	61	44	40	60	50	69	52	51	58	56	51	62	31	43	39	52	44	72	66	53	57	35	70	34	63	46	61	65
62	44	36	47	48	46	46	41	57	35	60	58	60	57	48	50	40	45	27	51	37	38	46	34	47	58	71	55	70	37	49	59	44	54	43	44	44	46	57	53	56	50	40	39	59	32	54	55	52	55
59	42	33	50	49	49	46	41	58	33	56	54	61	54	47	51	43	45	29	53	35	38	47	38	47	55	69	57	64	37	49	59	41	53	44	45	44	52	54	54	54	45	39	38	55	32	51	59	50	51
60	39	38	44	65	57	58	39	61	25	57	61	58	70	45	65	37	53	41	60	29	47	60	48	41	58	53	65	51	54	58	58	40	62	33	46	42	60	45	69	60	46	58	34	61	34	58	50	58	64
52	43	32	45	56	47	50	54	55	31	50	56	58	63	57	54	41	48	33	52	41	41	52	37	48	53	67	53	66	46	54	70	34	54	40	51	48	46	55	59	52	41	49	43	53	30	52	53	50	63
68	37	40	47	60	58	55	32	63	25	64	65	63	66	39	62	36	51	35	63	24	45	56	49	40	63	57	67	51	46	53	53	47	62	31	40	38	60	45	64	62	52	46	30	66	38	61	51	59	55
70	36	45	48	54	56	55	31	68	26	67	67	62	65	35	59	39	49	35	62	23	49	54	46	43	61	53	69	55	45	51	47	45	65	32	39	38	68	46	60	72	53	50	30	69	37	62	53	57	54
66	36	40	47	59	61	57	32	64	25	63	71	65	68	37	62	37	48	34	69	24	48	58	48	43	68	54	75	53	44	54	54	42	69	31	39	38	66	50	66	68	50	46	30	68	39	64	51	60	58
72	35	40	46	58	59	55	31	64	25	68	66	62	64	36	62	37	52	34	65	23	47	56	46	41	67	58	69	52	44	53	50	50	66	31	39	37	64	47	65	66	54	46	29	67	39	61	51	61	54
61	40	34	45	51	51	48	41	56	31	58	57	61	56	46	53	42	46	30	55	33	39	49	41	48	57	69	61	63	38	49	63	42	55	41	43	43	54	56	56	56	46	40	39	57	34	53	60	52	53
68	37	40	46	60	58	55	32	63	25	64	65	62	65	39	63	36	51	35	63	24	44	56	48	40	63	56	67	51	46	53	54	47	62	31	39	38	60	45	65	62	51	47	30	65	38	61	52	59	55
70	35	45	47	57	57	54	31	68	26	66	66	62	65	35	59	40	50	34	60	24	51	53	46	43	61	55	69	56	44	51	49	44	63	32	40	40	66	46	59	70	51	50	29	67	36	62	52	55	53
67	36	36	42	60	48	60	30	57	27	63	60	56	57	38	53	41	71	34	60	25	56	60	41	48	63	64	57	50	49	56	47	43	54	31	43	42	48	49	61	62	53	50	31	58	48	54	38	53	51
58	38	36	48	61	55	56	37	58	24	62	58	56	68	43	62	35	50	46	58	28	43	58	52	45	63	49	63	48	52	56	61	38	60	32	44	39	58	49	66	58	50	55	38	59	39	61	49	56	61
60	39	37	43	64	56	58	38	60	25	57	62	59	69	46	64	37	52	41	60	28	46	59	49	42	58	52	67	51	54	58	60	39	61	33	45	42	60	45	68	60	45	58	34	60	34	56	50	58	65
71	35	40	46	59	58	54	31	63	25	68	65	61	64	36	61	37	53	34	65	23	48	56	45	41	66	58	69	53	44	52	50	49	65	31	38	38	63	46	64	65	54	47	29	66	39	61	50	60	54
71	34	40	46	57	58	54	31	63	25	67	67	63	63	37	61	36	52	34	64	23	46	56	47	41	66	57	71	52	43	52	50	49	65	30	38	37	63	46	64	65	53	45	29	66	39	61	50	60	55
71	34	40	46	57	58	54	31	63	25	67	67	63	63	37	61	36	52	34	64	23	46	56	47	41	66	57	71	52	43	52	50	49	65	30	38	37	63	46	64	65	53	45	29	66	39	61	50	60	55
65	39	41	53	62	48	56	43	64	28	62	61	64	67	51	55	36	54	35	58	34	40	57	37	42	59	63	60	61	50	62	61	42	55	35	52	45	47	54	62	61	52	51	40	63	39	58	51	55	64
61	40	34	46	51	51	48	42	57	31	58	56	60	56	45	53	42	46	30	55	34	39	49	40	46	57	72	59	66	38	49	62	42	55	41	43	43	54	56	56	56	46	40	39	57	34	53	60	52	51
60	41	34	47	50	50	48	42	59	32	58	56	62	56	47	53	43	46	30	55	34	39	48	39	48	57	70	59	63	38	49	60	42	55	42	44	44	54	56	55	55	46	40	38	56	33	53	60	51	52
62	41	41	47	63	61	55	35	65	26	59	65	62	69	41	63	39	49	38	65	26	49	58	50	43	61	55	70	52	49	56	58	41	65	34	43	41	63	47	67	63	49	52	32	66	36	62	54	61	58
67	36	38	50	55	56	52	33	66	26	64	64	67	61	40	59	37	50	33	61	25	43	53	45	44	63	59	67	52	42	52	50	46	61	32	39	39	60	46	61	61	51	44	29	63	37	58	50	57	56
60	39	38	44	64	57	58	39	61	25	57	63	60	70	47	65	36	51	41	60	29	45	60	50	41	58	51	67	50	54	58	58	40	62	33	46	41	60	45	69	60	46	57	34	61	34	57	50	58	66
67	34	43	45	57	57	53	32	65	25	64	64	60	63	35	57	41	51	34	58	24	51	52	45	42	61	56	67	55	42	49	47	43	60	31	38	39	62	47	57	68	50	49	29	64	35	60	50	53	52
66	38	42	47	58	53	55	35	66	25	62	62	60	71	40	59	37	51	40	56	27	46	58	46	41	56	52	65	54	50	56	53	42	60	34	44	39	63	44	63	67	50	55	32	63	35	58	51	56	58
65	34	34	39	59	51	64	30	55	26	60	54	51	56	35	50	39	69	33	56	24	53	56	37	44	59	61	51	48	46	53	43	41	51	29	41	41	45	46	57	58	50	49	30	54	45	51	37	50	46
60	39	37	43	63	57	58	38	61	25	57	63	60	70	46	65	36	52	41	60	29	45	60	49	41	58	51	67	50	54	58	59	39	62	33	46	41	60	45	69	61	46	57	34	61	34	57	51	59	66
68	36	39	46	59	57	54	32	62	25	65	66	63	65	39	61	36	51	35	63	24	44	56	49	41	63	56	69	51	45	53	54	46	62	31	39	38	60	45	64	62	51	46	30	64	37	59	50	59	56
67	35	38	49	57	56	52	33	66	25	64	64	65	61	39	59	38	51	33	61	24	45	53	45	44	63	59	67	53	42	52	50	46	61	32	39	39	60	45	61	61	51	45	28	63	37	58	50	57	55
71	35	40	46	59	58	54	31	63	25	68	65	61	64	36	61	37	53	34	65	23	48	56	45	41	66	58	69	53	44	52	50	49	65	31	38	38	63	46	64	65	54	47	29	66	39	61	50	60	54
67	34	43	46	56	57	53	32	65	25	64	64	60	63	35	57	42	52	34	58	23	51	51	45	42	61	56	66	55	43	49	47	42	61	30	39	38	63	46	57	69	50	49	29	65	35	60	50	54	53
61	38	40	49	66	63	61	35	65	27	58	75	70	75	44	69	39	53	30	73	25	54	59	46	46	67	57	69	58	53	55	59	37	67	28	38	42	55	57	67	74	45	52	32	69	42	67	46	58	55
64	38	43	48	56	53	55	34	65	25	61	62	59	68	38	58	36	51	40	56	26	45	57	45	40	56	50	64	53	50	55	52	43	62	33	42	37	65	43	62	67	51	53	31	63	36	57	50	58	58
65	38	42	46	60	53	55	36	65	25	62	62	60	68	38	59	37	53	40	56	27	47	57	46	42	56	51	65	55	50	55	54	42	59	34	43	40	62	44	62	66	49	55	32	62	34	58	50	55	58
67	33	43	45	57	57	54	31	65	25	64	63	60	65	36	57	42	52	34	59	24	52	53	45	41	60	57	66	56	44	50	47	43	60	31	38	38	62	48	58	69	49	50	29	64	35	60	50	53	52
64	37	34	42	62	50	63	31	56	28	61	60	56	58	39	55	42	74	35	62	26	58	62	42	51	59	61	56	49	51	58	48	40	53	32	44	44	48	51	63	61	50	51	32	57	50	53	38	51	49
68	34	43	46	57	57	53	32	66	25	64	64	60	64	35	57	41	52	34	58	24	51	52	45	42	61	56	67	55	43	50	47	43	61	31	39	39	62	47	57	68	50	50	29	65	35	61	51	53	53
67	35	42	45	55	53	56	31	65	27	64	64	60	62	36	56	40	51	36	57	25	50	56	46	45	57	54	67	54	46	53	47	42	60	33	40	41	63	48	56	67	53	50	30	64	38	59	50	53	53
70	40	47	55	59	61	60	34	73	29	67	76	69	67	38	71	38	50	37	78	24	54	66	45	48	67	54	71	53	54	59	55	46	85	33	43	42	69	49	71	73	59	55	34	81	45	68	56	72	62
61	38	39	49	65	63	61	35	64	27	57	74	68	74	43	68	39	53	30	73	25	54	58	45	48	67	57	67	58	53	54	60	37	67	28	38	41	55	57	67	74	45	51	32	69	42	66	46	58	55
67	36	36	42	60	48	60	30	57	27	63	60	56	57	38	53	41	71	34	60	25	56	60	41	48	63	64	57	50	49	56	47	43	54	31	43	42	48	49	61	62	53	50	31	58	48	54	38	53	51
53	38	30	41	56	62	55	32	52	28	51	59	54	54	37	55	48	55	43	61	25	56	55	48	51	56	50	60	44	48	51	49	33	57	33	44	43	58	45	62	55	42	50	32	56	41	51	45	49	50
47	50	22	35	60	46	56	49	46	35	44	50	48	61	50	60	47	59	50	48	38	65	63	50	58	47	48	47	43	73	60	53	22	53	40	57	59	48	45	60	51	37	72	46	46	35	46	39	46	53
56	39	31	41	59	63	55	34	54	29	53	58	54	56	37	58	48	56	43	61	26	58	56	47	48	56	52	60	45	49	53	48	34	58	34	44	44	59	46	62	56	43	51	32	56	42	53	46	50	47
68	36	40	47	60	58	55	32	64	25	65	65	63	66	38	61	36	51	35	64	24	45	56	48	40	64	57	68	51	45	53	53	48	63	32	40	38	61	45	64	63	52	46	30	66	38	61	52	60	54
58	38	36	48	61	55	56	37	58	24	62	58	56	68	43	62	35	50	46	58	28	43	58	52	45	63	49	63	48	52	56	61	38	60	32	44	39	58	49	66	58	50	55	38	59	39	61	49	56	61
54	43	32	45	58	49	52	52	54	31	51	57	59	65	56	56	42	50	34	55	41	41	55	37	47	55	66	55	66	47	55	72	35	56	40	52	48	47	57	62	54	42	50	44	55	31	53	54	53	64
72	35	46	48	55	56	55	32	69	26	68	68	63	66	36	61	38	49	35	61	24	50	55	47	43	61	54	70	56	45	52	48	45	65	32	39	39	66	47	60	72	53	50	30	68	37	64	53	56	55
72	35	45	47	58	55	55	31	68	26	66	66	62	68	37	60	40	51	34	61	24	51	55	46	43	60	55	68	57	45	52	49	44	63	32	38	40	64	47	60	72	51	53	29	67	36	62	52	55	53
69	35	43	48	57	59	55	32	67	25	66	72	66	71	36	63	37	48	33	65	23	47	55	46	41	66	54	73	56	44	52	50	47	68	31	38	37	67	48	63	71	53	47	29	71	37	67	53	60	57
87	36	50	51	59	53	58	31	75	26	82	72	67	69	36	61	36	58	33	65	25	51	59	40	44	71	63	67	60	45	54	51	57	66	30	40	40	56	49	63	75	64	52	30	75	43	68	46	61	56
66	40	35	42	65	46	58	35	57	27	61	57	55	61	40	53	39	72	36	57	26	54	60	42	47	60	63	53	49	50	57	50	42	51	33	45	42	45	46	62	59	50	54	33	55	44	52	39	54	53
66	33	42	45	55	56	52	31	64	25	63	65	60	62	35	56	41	51	34	57	23	50	50	46	44	60	55	67	54	42	48	49	42	60	30	38	38	61	46	56	67	49	48	29	64	35	59	49	53	54
75	31	49	54	56	54	54	29	70	23	75	74	66	70	35	56	33	56	31	69	21	50	55	40	41	74	57	67	58	42	51	53	57	62	25	34	35	52	50	62	74	62	46	28	74	47	73	43	60	55
52	32	36	52	57	48	48	36	59	21	55	65	63	69	41	54	31	46	38	53	25	37	52	45	41	57	50	64	49	45	49	59	34	51	29	36	35	57	45	58	55	46	46	33	60	35	64	50	48	56
52	40	36	49	55	47	47	44	58	30	50	61	63	62	50	54	39	43	30	52	35	37	50	39	46	50	61	61	63	41	50	62	34	51	41	43	47	56	56	55	54	41	43	40	59	31	57	66	47	53
55	32	37	50	62	50	51	36	61	22	52	67	66	73	43	56	33	48	34	56	26	40	55	42	38	53	52	66	52	48	52	55	36	53	30	37	36	58	43	61	58	43	49	30	62	33	61	52	50	57
[truncated: 633 more rows]
[truncated: 1,371 more columns]

## Sheet: target similarity
100	49.2908	46.6942	47.3282	46.9027	51.963	62.5899	61.488	56.3525	53.3101	62.7193	49.8433	50.4	47.2103	44	47.6378	47.1223	48.8479	52.9954	49.2683	46.0251	41.5584	52.6316	52.451	52.193	48.7805	53.2338	45.9459	47.9853	50	43.75	47.0199	64.8148	50	43.6813	48.3333	44.6328	46.875	47.7273	50.7109	54.9505	46.6102	47.4138	45.7944	43.038	58.4507	63.2353	57.5439	60	58.4071
[truncated: 155 more rows]
[truncated: 106 more columns]
